# Supplementary material
Source: MDPI journal article supplement (https://www.mdpi.com/1424-2818/15/4/572)
Supplement: s1 [file s1 › Table S1.xlsx]

## Sheet: Лист1
Table S1. Physical, chemical and biological characteristics of samples
№	Sample ID	Sample site	Station coordinates	Month	Distance from the shore (m)	Sampling depth	pH	Т, ᵒC	Ес25 µS/cm	О2		Si, mg/L			N-NH4, mg/L			N-NO2 , mg/L			N-NO3, mg/L			P-PО4, mg/L			Р total, mg/L			Total organic matter (mg С/L)	Total phytoplankton abundance (TPA), (×103) cells/L	Total phytoplankton biomass (TPB), mg/m3
										mg/L	% saturation	dissolved	particulated	sum	dissolved	particulated	sum	dissolved	particulated	sum	dissolved	particulated	sum	dissolved	particulated	sum	dissolved	particulated	sum
1	V1UI-0	Varnachka	51°54′08.0″N, 105°06′10.8″E	April	50	0	8.11	0.4	119.7	14.24	104	0.46	0.15	0.61	˂0,01	-	˂0,01	0.001	0.001	0.002	0.04	0.01	0.05	0.003	0.002	0.005	0.032	0.031	0.063	1.58062	1010.57	35589.2
2	V1UI-5	Varnachka	51°54′08.0″N, 105°06′10.8″E	April	50	5	8.11	0.4	118.5	14.24	104	0.47	0.1	0.57	˂0,01	-	˂0,01	˂0,001	0.002	0.002	0.04	0.01	0.05	0.003	0.001	0.004	0.028	0.021	0.049	2.5875	606.499	18633.6
3	V2UI-0	Varnachka	51°54′00.9″N, 105°06′06.0″E	April	200	0	8.12	0.4	113	13.55	99	0.43	0.07	0.5	˂0,01	-	˂0,01	0.001	-	0.001	0.05	-	0.05	0.003	0.002	0.005	0.02	0.011	0.031	0.78	220.89	5041.22
4	V2UI-5	Varnachka	51°54′00.9″N, 105°06′06.0″E	April	200	5	8.13	0.4	121.5	14.32	105	0.46	0.04	0.5	˂0,01	-	˂0,01	˂0,001	0.001	0.001	0.07	-	0.07	0.004	0.001	0.005	0.016	0.007	0.023	0.66375	155.165	638.289
5	V2UI-10	Varnachka	51°54′00.9″N, 105°06′06.0″E	April	200	10	8.09	0.4	122.2	14.25	104	0.47	0.03	0.5	˂0,01	-	˂0,01	˂0,001	-	0	0.06	0.01	0.07	0.005	0.001	0.006	0.017	0.008	0.025	0.4875	128.557	418.221
6	V2UI-30	Varnachka	51°54′00.9″N, 105°06′06.0″E	April	200	30	8.11	0.4	123.6	14.29	105	0.46	0.02	0.48	˂0,01	-	˂0,01	˂0,001	0.001	0.001	0.06	-	0.06	0.005	0.001	0.006	0.018	0.007	0.025	0.975	210.833	348.599
7	V3UI-0	Varnachka	51°54′37.1″ N, 105°05′45.5″E	April	1000	0	8.1	0.4	121.9	14.21	104	0.46	0.05	0.51	˂0,01	-	˂0,01	˂0,001	0.001	0.001	0.06	-	0.06	0.006	0	0.006	0.022	0.003	0.025	0.7125	126.667	1828.29
8	V3UI-5	Varnachka	51°54′37.1″ N, 105°05′45.5″E	April	1000	5	8.09	0.4	123.4	14.35	105	0.45	0.04	0.49	˂0,01	-	˂0,01	˂0,001	0.001	0.001	0.06	-	0.06	0.005	0.001	0.006	0.019	0.007	0.026	0.62625	167.443	381.934
9	V3UI-10	Varnachka	51°54′37.1″ N, 105°05′45.5″E	April	1000	10	8.08	0.4	123.5	14.32	105	0.43	0.06	0.49	˂0,01	-	˂0,01	˂0,001	0.001	0.001	0.06	0.01	0.07	0.005	0.001	0.006	0.018	0.011	0.029	0.525	213.059	343.455
10	V3UI-30	Varnachka	51°54′37.1″ N, 105°05′45.5″E	April	1000	30	8.1	0.4	123.9	14.29	105	0.46	0.04	0.5	˂0,01	-	˂0,01	˂0,001	0.001	0.001	0.07	-	0.07	0.006	0.001	0.007	0.019	0.006	0.025	0.7875	287.226	367.899
11	V1OW-0	Varnachka	51°54′08.0″N, 105°06′10.8″E	July	50	0	7.95	3.2	123.2	12.74	101	0.53328	ND	ND	˂0,01	ND	ND	˂0,001	ND	ND	0.1	ND	ND	0.009	ND	ND	0.013	ND	ND	3.4875	49.0909	41.3867
12	V1OW-3	Varnachka	51°54′08.0″N, 105°06′10.8″E	July	50	3	7.67	4.5	123.1	13.21	108	0.57772	ND	ND	˂0,01	ND	ND	˂0,001	ND	ND	0.2	ND	ND	0.01	ND	ND	0.012	ND	ND	1.725	51.9622	33.4271
13	V1OW-7	Varnachka	51°54′08.0″N, 105°06′10.8″E	July	50	7	7.77	3.7	123.5	13.22	106	0.5656	ND	ND	˂0,01	ND	ND	˂0,001	ND	ND	0.1	ND	ND	0.009	ND	ND	0.011	ND	ND	1.425	48.9091	51.9705
14	V2OW-0	Varnachka	51°54′00.9″N, 105°06′06.0″E	July	200	0	8.03	3.6	122.7	13.31	106	0.5656	ND	ND	˂0,01	ND	ND	˂0,001	ND	ND	0.1	ND	ND	0.009	ND	ND	0.012	ND	ND	1.2	56.4619	42.3309
15	V2OW-5	Varnachka	51°54′00.9″N, 105°06′06.0″E	July	200	5	7.95	3.4	123.2	13.37	106	0.54944	ND	ND	˂0,01	ND	ND	˂0,001	ND	ND	0.1	ND	ND	0.008	ND	ND	0.011	ND	ND	1.1625	83.125	81.0453
16	V2OW-10	Varnachka	51°54′00.9″N, 105°06′06.0″E	July	200	10	7.87	3.6	122.5	13.38	107	0.56156	ND	ND	˂0,01	ND	ND	˂0,001	ND	ND	0.1	ND	ND	0.009	ND	ND	0.014	ND	ND	1.4625	74.6633	81.5321
17	V2OW-30	Varnachka	51°54′00.9″N, 105°06′06.0″E	July	200	30	7.84	3.7	122.2	13.29	106	0.58984	ND	ND	˂0,01	ND	ND	˂0,001	ND	ND	0.1	ND	ND	0.01	ND	ND	0.011	ND	ND	1.1625	66.8209	87.3701
18	V3OW-0	Varnachka	51°54′37.1″ N, 105°05′45.5″E	July	1000	0	7.93	4.4	122.4	13.24	108	0.57772	ND	ND	˂0,01	ND	ND	˂0,001	ND	ND	0.1	ND	ND	0.009	ND	ND	0.019	ND	ND	1.65	88.2428	68.2649
19	V3OW-5	Varnachka	51°54′37.1″ N, 105°05′45.5″E	July	1000	5	7.94	4	122.4	13.78	111	0.58176	ND	ND	˂0,01	ND	ND	˂0,001	ND	ND	0.1	ND	ND	0.01	ND	ND	0.013	ND	ND	0.9	62.6289	67.2919
20	V3OW-10	Varnachka	51°54′37.1″ N, 105°05′45.5″E	July	1000	10	7.92	3.6	122.2	13.19	105	0.57368	ND	ND	˂0,01	ND	ND	˂0,001	ND	ND	0.1	ND	ND	0.01	ND	ND	0.011	ND	ND	1.5	68.0488	106.564
21	V3OW-30	Varnachka	51°54′37.1″ N, 105°05′45.5″E	July	1000	30	7.84	4.7	122.3	13.14	108	0.5858	ND	ND	˂0,01	ND	ND	˂0,001	ND	ND	0.1	ND	ND	0.01	ND	ND	0.011	ND	ND	1.4625	51.7907	75.9672
22	S1UI-0	Selenga	52°16.468′N, 106°15.490′E	March	0 (mouth)	0	7.45	0.4	225.7	7.6	56	6.02	0.08	6.1	0.04	0.028	0.068	0.002	0.002	0.004	0.26	0.12	0.38	0.012	0.007	0.019	0.021	0.003	0.024	2.3625	189.678	21.9371
23	S1UI-4	Selenga	52°16.468′N, 106°15.490′E	March	0 (mouth)	4	7.51	0.4	224.2	7.27	53	5.96	0.04	6	0.03	0.049	0.082	0.002	0.008	0.01	0.38	0.01	0.39	0.006	0.016	0.022	0.02	0.009	0.029	2.5125	235.979	66.1623
24	S2UI-0	Selenga	52°16.917′N, 106°14.020′E	March	1000	0	8.11	0.4	133.9	13.85	101	1.02	0.02	1.04	˂0,01	0.017	0.017	0.001	-	0.001	0.06	0.01	0.07	0.001	0.003	0.004	0.005	0.004	0.009	1.6125	329.88	2701.03
25	S2UI-4	Selenga	52°16.917′N, 106°14.020′E	March	1000	4	7.98	1.7	131.7	14.07	107	0.86	0.14	1	˂0,01	0.023	0.024	0.001	-	0.001	0.04	0.01	0.05	0.001	0.004	0.005	0.004	0.01	0.014	2.1375	348.686	2932.09
26	S3UI-0	Selenga	52°17.472′N, 106°12.475′E	March	3000	0	8.03	0.4	128.2	13.45	98	0.72	0.08	0.8	˂0,01	0.035	0.04	0.001	-	0.001	0.06	0.01	0.07	0.001	0.007	0.008	0.017	0.001	0.018	1.95	382.621	7243.76
27	S3UI-10	Selenga	52°17.472′N, 106°12.475′E	March	3000	10	8.07	1.3	127.9	13.28	100	0.7	0.02	0.72	˂0,01	-	˂0,01	0.001	-	0.001	0.04	0.01	0.05	0.001	0.003	0.004	0.016	0.002	0.018	1.4625	244.613	667.871
28	S3UI-15	Selenga	52°17.472′N, 106°12.475′E	March	3000	15	8.1	1.3	127.4	13.32	100	0.71	0.05	0.76	˂0,01	-	˂0,01	0.001	-	0.001	0.06	0.01	0.07	0.001	0.005	0.006	0.007	0.006	0.013	1.0125	229.897	822.295
29	S4UI-0	Selenga	52°18.029′N, 106°11.136′E	March	5000	0	8.06	0.4	130.7	13.08	96	0.72	0.05	0.77	˂0,01	0.075	0.076	0.001	0.001	0.002	0.06	0.03	0.09	˂0,001	0.02	0.02	0.013	0.028	0.041	2.2875	573.898	14012.7
30	S4UI-10	Selenga	52°18.029′N, 106°11.136′E	March	5000	10	8.1	1.1	127.2	12.71	95	0.64	0.02	0.66	˂0,01	0.015	0.018	0.001	-	0.001	0.06	0.01	0.07	0.002	0.005	0.007	0.012	0.003	0.015	3.7875	100.714	758.201
31	S4UI-20	Selenga	52°18.029′N, 106°11.136′E	March	5000	20	ND	ND	ND	ND	ND	ND	ND	ND	ND	ND	ND	ND	ND	ND	ND	ND	ND	ND	ND	ND	ND	ND	ND	ND	200.08	0.132203
32	S4UI-30	Selenga	52°18.029′N, 106°11.136′E	March	5000	30	7.91	1.1	141.2	13.35	100	1.42	0.07	1.49	˂0,01	0.015	0.015	0.001	0.002	0.003	0.09	0.01	0.1	0	0.007	0.007	0.009	0.001	0.01	2.2875	271.695	287.582
