# Supplementary material
Source: MDPI journal article supplement (https://www.mdpi.com/1424-2818/15/4/572)
Supplement: s1 [file s1 › Table S2.xlsx]

## Sheet: Alpha.idxs
Table S2. Non-parametric alpha-diversity metrics calculated for the bacterial (FL and PA) and microeukariotic samples
				Bacteria						Eukaryota
id	code	month	lifestyle	Reads	Observed	ACE	Shannon	Simpson	InvSimpson	Reads	Observed	ACE	Shannon	Simpson	InvSimpson
1	V1UI-0-FL	Apr	FL	10432	388	426.093	4.09308	0.956233	22.8485	ND	ND	ND	ND	ND	ND
2	V1UI-0-PA	Apr	PA	5419	272	401.785	3.31138	0.884111	8.62893	15932	96	126.46	1.72863	0.63998	2.77762
3	V1UI-5-FL	Apr	FL	11281	372	399.429	3.98983	0.951763	20.7309	ND	ND	ND	ND	ND	ND
4	V1UI-5-PA	Apr	PA	4816	222	325.491	3.08678	0.862552	7.27549	9995	70	85.8538	1.82965	0.732136	3.73323
5	V2UI-0-FL	Apr	FL	11032	375	413.985	4.00047	0.945607	18.3846	ND	ND	ND	ND	ND	ND
6	V2UI-0-PA	Apr	PA	5205	144	173.355	2.59974	0.787637	4.70892	14587	82	100.223	1.40021	0.52058	2.08586
7	V2UI-5-FL	Apr	FL	17359	415	443.943	4.00046	0.955442	22.4429	ND	ND	ND	ND	ND	ND
8	V2UI-5-PA	Apr	PA	2275	92	124.771	2.32323	0.793263	4.83706	4760	68	95.9594	0.88383	0.277382	1.38386
9	V2UI-10-FL	Apr	FL	ND	ND	ND	ND	ND	ND	ND	ND	ND	ND	ND	ND
10	V2UI-10-PA	Apr	PA	ND	ND	ND	ND	ND	ND	21061	125	131.374	3.11797	0.901109	10.1121
11	V2UI-30-FL	Apr	FL	10058	371	442.674	3.96156	0.954691	22.0708	ND	ND	ND	ND	ND	ND
12	V2UI-30-PA	Apr	PA	5193	151	193.218	1.81741	0.609657	2.56185	ND	ND	ND	ND	ND	ND
13	V3UI-0-FL	Apr	FL	11668	366	393.682	3.91981	0.949635	19.8551	ND	ND	ND	ND	ND	ND
14	V3UI-0-PA	Apr	PA	7811	209	284.692	2.52824	0.767619	4.30328	14936	88	96.8765	1.54644	0.584941	2.40929
15	V3UI-5-FL	Apr	FL	6592	324	381.25	3.97283	0.955034	22.239	ND	ND	ND	ND	ND	ND
16	V3UI-5-PA	Apr	PA	ND	ND	ND	ND	ND	ND	1740	65	74.3574	2.37704	0.778977	4.52441
17	V3UI-10-FL	Apr	FL	6770	310	362.253	3.77021	0.940532	16.8156	ND	ND	ND	ND	ND	ND
18	V3UI-10-PA	Apr	PA	3673	107	164.448	1.52325	0.540966	2.17849	2847	97	130.976	2.86278	0.883874	8.61135
19	V3UI-30-FL	Apr	FL	11805	358	394.668	4.01302	0.959812	24.8831	ND	ND	ND	ND	ND	ND
20	V3UI-30-PA	Apr	PA	1962	84	170.415	1.3905	0.480893	1.92639	3416	65	92.4516	1.46171	0.49659	1.98645
21	V1OW-0-FL	Jul	FL	14063	372	449.634	3.64503	0.933454	15.0272	ND	ND	ND	ND	ND	ND
22	V1OW-0-PA	Jul	PA	5162	207	249.012	3.87013	0.95341	21.4636	8527	115	134.452	2.67897	0.824798	5.70771
23	V1OW-3-FL	Jul	FL	10627	388	451.753	4.14008	0.964422	28.1069	ND	ND	ND	ND	ND	ND
24	V1OW-3-PA	Jul	PA	5697	210	243.093	3.57708	0.930118	14.3098	6494	125	135.431	3.41746	0.939579	16.5506
25	V1OW-7-FL	Jul	FL	8619	375	429.161	4.18019	0.966198	29.5839	ND	ND	ND	ND	ND	ND
26	V1OW-7-PA	Jul	PA	2529	122	181.13	2.70006	0.845807	6.4854	5167	104	118.841	2.99708	0.886148	8.78334
27	V2OW-0-FL	Jul	FL	10923	388	442.624	4.10221	0.962917	26.9665	ND	ND	ND	ND	ND	ND
28	V2OW-0-PA	Jul	PA	5509	271	347.192	3.93108	0.954894	22.1698	6162	129	139.091	3.46768	0.946607	18.7289
29	V2OW-5-FL	Jul	FL	11281	388	424.149	4.09137	0.958085	23.8579	ND	ND	ND	ND	ND	ND
30	V2OW-5-PA	Jul	PA	5882	262	324.381	3.95942	0.951609	20.665	7686	135	162.402	3.33803	0.933121	14.9524
31	V2OW-10-FL	Jul	FL	10849	396	451.627	4.13952	0.961362	25.8815	ND	ND	ND	ND	ND	ND
32	V2OW-10-PA	Jul	PA	4973	239	297.734	3.99746	0.958417	24.0485	6697	143	168.738	3.3046	0.930708	14.4316				.
33	V2OW-30-FL	Jul	FL	8672	370	454.486	4.04726	0.957959	23.7863	ND	ND	ND	ND	ND	ND
34	V2OW-30-PA	Jul	PA	5240	255	318.767	3.96131	0.948988	19.6033	6733	138	147.446	3.49577	0.947764	19.1437
35	V3OW-0-FL	Jul	FL	6029	338	392.421	4.11547	0.96258	26.7237	ND	ND	ND	ND	ND	ND
36	V3OW-0-PA	Jul	PA	4574	219	247.765	3.76548	0.949058	19.6301	7135	112	129.031	2.92486	0.864238	7.36582
37	V3OW-5-FL	Jul	FL	8635	355	404.856	3.97988	0.956034	22.7449	ND	ND	ND	ND	ND	ND
38	V3OW-5-PA	Jul	PA	5557	202	223.395	3.40967	0.905193	10.5478	5795	121	133.307	3.49655	0.949851	19.9406
39	V3OW-10-FL	Jul	FL	8246	343	420.472	3.89538	0.954011	21.7443	ND	ND	ND	ND	ND	ND
40	V3OW-10-PA	Jul	PA	5295	252	322.806	3.81333	0.947126	18.9128	5026	128	137.011	3.51812	0.945481	18.3423
41	V3OW-30-FL	Jul	FL	9537	366	408.498	4.07742	0.961967	26.2933	ND	ND	ND	ND	ND	ND
42	V3OW-30-PA	Jul	PA	6748	233	284.836	3.569	0.926319	13.5721	5889	117	125.207	3.47276	0.945478	18.3414
43	S1UI-0-FL	Mar	FL	9816	205	244.437	3.63302	0.937363	15.9651	ND	ND	ND	ND	ND	ND
44	S1UI-0-PA	Mar	PA	4326	171	239.584	3.32475	0.907741	10.8391	12733	104	118.16	2.18149	0.732911	3.74407
45	S1UI-4-FL	Mar	FL	12083	201	233.412	3.62801	0.941309	17.0385	ND	ND	ND	ND	ND	ND
46	S1UI-4-PA	Mar	PA	4170	155	189.616	3.06815	0.884529	8.66018	12753	99	109.767	1.98406	0.666474	2.99826
47	S2UI-0-FL	Mar	FL	9424	405	487.392	4.14123	0.963822	27.6412	ND	ND	ND	ND	ND	ND
48	S2UI-0-PA	Mar	PA	2316	174	237.658	3.30069	0.884059	8.62509	13105	117	142.952	2.28538	0.741514	3.86868
49	S2UI-4-FL	Mar	FL	9017	356	419.193	3.99761	0.960176	25.1108	ND	ND	ND	ND	ND	ND
50	S2UI-4-PA	Mar	PA	4086	159	248.768	2.55616	0.804059	5.10357	2732	110	147.364	2.46234	0.745445	3.92843
51	S3UI-0-FL	Mar	FL	9330	383	458.082	4.02842	0.962408	26.6013	ND	ND	ND	ND	ND	ND
52	S3UI-0-PA	Mar	PA	4892	176	252.198	2.37679	0.765308	4.26091	12669	105	133.375	1.27124	0.413964	1.70638
53	S3UI-10-FL	Mar	FL	9372	360	422.474	3.96248	0.959876	24.9224	ND	ND	ND	ND	ND	ND
54	S3UI-10-PA	Mar	PA	7273	182	256.841	2.41029	0.778436	4.51338	6753	107	122.43	1.33798	0.391003	1.64205
55	S3UI-15-FL	Mar	FL	8827	364	413.462	4.03988	0.960971	25.6218	ND	ND	ND	ND	ND	ND
56	S3UI-15-PA	Mar	PA	4241	172	236.285	2.53319	0.782973	4.60772	4893	121	150.179	3.39209	0.940014	16.6705
57	S4UI-0-FL	Mar	FL	11065	296	347.641	3.61932	0.939904	16.64	ND	ND	ND	ND	ND	ND
58	S4UI-0-PA	Mar	PA	10532	130	164.676	2.329	0.818749	5.51722	17317	46	68.2839	0.174922	0.0505408	1.05323
59	S4UI-10-FL	Mar	FL	8386	360	406.139	4.0381	0.958216	23.9325	ND	ND	ND	ND	ND	ND
60	S4UI-10-PA	Mar	PA	8222	183	257.028	2.49343	0.779497	4.53508	ND	ND	ND	ND	ND	ND
61	S4UI-20-FL	Mar	FL	10263	386	456.36	3.9941	0.95847	24.0787	ND	ND	ND	ND	ND	ND
62	S4UI-20-PA	Mar	PA	7214	196	278.181	2.60124	0.807061	5.18298	2210	95	136.381	3.4492	0.946759	18.7827
63	S4UI-30-FL	Mar	FL	8502	400	450.071	4.30512	0.962487	26.6571	ND	ND	ND	ND	ND	ND
64	S4UI-30-PA	Mar	PA	2345	165	261.241	2.81401	0.812648	5.33755	4476	86	98.5283	1.63027	0.51658	2.0686
