# Supplementary material
Source: MDPI journal article supplement (https://www.mdpi.com/1424-2818/15/4/572)
Supplement: s1 [file s1 › Table S3.xlsx]

## Sheet: Euk_tax_merged
id	embl	slv	mothur	counts	tot_abund	tax_class_merged	nearest_acc	nearest_id	GenBank Summary
OTU4	Eukaryota;	Eukaryota;SAR;Alveolata;	Eukaryota;Dinoflagellata;Dinophyceae;Dinophyceae_unclassified;Dinophyceae_unclassified;Dinophyceae_unclassified	67418	0.210831	Dinoflagellata	EF417316,EF417314,KC771146,KJ763731,KJ758116,KJ760672,KR535601,KJ763230,KJ763426	0.993939,0.981818,0.981818,0.981818,0.981818,0.981818,0.981818	NCBI Hits Summary
OTU22	Eukaryota;environmental samples;	Eukaryota;SAR;Alveolata;	Eukaryota;Dinoflagellata;Dinophyceae;Gymnodiniphycidae;Gymnodinium_clade;Gymnodinium_clade_ge	21952	0.0521581	Dinoflagellata	KJ758547,DQ103871,KJ758254,AF022196,KJ757985,KJ759537,KJ759489,KJ758214	0.984848,0.984848,0.981818,0.981818,0.981818,0.981818,0.981818,0.981818	NCBI Hits Summary
OTU12	Eukaryota;Viridiplantae;Chlorophyta;Chlorophyceae;Chlamydomonadales;	Eukaryota;Archaeplastida;Chloroplastida;Chlorophyta;Chlorophyceae;Chlamydomonadales;	Eukaryota;Chlorophyta_ph;Chlorophyceae;Chlorophyceae_or;Chlorophyceae_fa;Chlorophyceae_ge	13318	0.034954	Chlorophyta	KM020018,FR854385	0.990854,0.984756	NCBI Hits Summary
OTU31	Eukaryota;	Eukaryota;SAR;Stramenopiles;Ochrophyta;Diatomea;Bacillariophytina;Mediophyceae;Thalassiosira;	Eukaryota;Diatomea;Mediophyceae;Mediophyceae_or;Mediophyceae_fa;Mediophyceae_fa_unclassified	8768	0.0457717	Bacillariophyceae	AB831890,DQ093366,EU050968,AJ810854,HM991689,DQ093369,KC771208	0.990937,0.990937,0.987915,0.987915,0.987915,0.987915,0.984894	NCBI Hits Summary
OTU6	Eukaryota;Stramenopiles;Bacillariophyta;Fragilariophyceae;Fragilariophycidae;	Eukaryota;SAR;Stramenopiles;Ochrophyta;Diatomea;Coscinodiscophytina;Fragilariales;	Eukaryota;Diatomea;Coscinodiscophytina_cl;Fragilariales;Fragilariales_fa;Ulnaria	8386	0.0720765	Bacillariophyceae	OM837381,OM837380,EF423422,EF465476	1,1	NCBI Hits Summary
OTU16	Eukaryota;Viridiplantae;Chlorophyta;Ulvophyceae;	Eukaryota;Archaeplastida;Chloroplastida;Chlorophyta;Ulvophyceae;	Eukaryota;Chlorophyta_ph;Ulvophyceae;Ulvophyceae_or;Ulvophyceae_fa;Ulvophyceae_ge	7970	0.0356735	Chlorophyta	MF034653,AY278217,Z47996,MF034602,FR865654,MF034647,MF034601	0.990798,0.990798,0.990798,0.97546,0.97546	NCBI Hits Summary
OTU1	Eukaryota;environmental samples;	Eukaryota;SAR;Alveolata;	Eukaryota;Dinoflagellata;Dinophyceae;Dinophyceae_unclassified;Dinophyceae_unclassified;Dinophyceae_unclassified	6702	0.0180824	Dinoflagellata	KJ763588,DQ103862,KJ758039,KJ757956,KJ758372,KJ757407	0.981818,0.981818,0.981818,0.975758,0.975758,0.975758	NCBI Hits Summary
OTU9	Eukaryota;environmental samples;	Eukaryota;SAR;Alveolata;	Eukaryota;Dinoflagellata;Dinophyceae;Dinophyceae_unclassified;Dinophyceae_unclassified;Dinophyceae_unclassified	6655	0.0312919	Dinoflagellata	KJ762691,KJ762416,KJ763359,KJ762321,KJ759266,KJ759500,KJ763108,KJ762900,KJ757950	0.966463,0.966463,0.966463,0.966463,0.966463,0.966463,0.966463,0.966463,0.966463	NCBI Hits Summary
OTU30	Eukaryota;Stramenopiles;Bacillariophyta;Coscinodiscophyceae;	Eukaryota;SAR;Stramenopiles;Ochrophyta;Diatomea;	Eukaryota;Diatomea;Coscinodiscophytina_cl;Coscinodiscophytina_or;Melosirids;Aulacoseira	6389	0.0399361	Bacillariophyceae	AY121820	1	NCBI Hits Summary
OTU21	Eukaryota;	Eukaryota;SAR;Alveolata;Dinoflagellata;Dinophyceae;Peridiniphycidae;	Eukaryota;Dinoflagellata;Dinophyceae;Peridiniphycidae_or;Thoracosphaeraceae;Thoracosphaeraceae_ge	6332	0.0356239	Dinoflagellata	JN090875	0.99697	NCBI Hits Summary
OTU20	Eukaryota;	Eukaryota;SAR;Alveolata;Ciliophora;Intramacronucleata;Spirotrichea;Choreotrichia;	Eukaryota;Ciliophora;Intramacronucleata;Spirotrichea;Choreotrichia;Tintinnidium	5241	0.0265033	Ciliophora	EU162620	0.984326	NCBI Hits Summary
OTU231	Eukaryota;	Eukaryota;SAR;Alveolata;Dinoflagellata;Dinophyceae;Gymnodiniphycidae;	Eukaryota;Dinoflagellata;Dinophyceae;Dinophyceae_unclassified;Dinophyceae_unclassified;Dinophyceae_unclassified	4244	0.01117	Dinoflagellata	GU295203	0.963636	NCBI Hits Summary
OTU3	Eukaryota;Alveolata;	Eukaryota;SAR;Alveolata;Ciliophora;Intramacronucleata;Spirotrichea;Hypotrichia;	Eukaryota;Ciliophora;Intramacronucleata;Spirotrichea;Hypotrichia;Halteria	3560	0.0178938	Ciliophora	DQ244036,DQ244039,GU067965,AF164137	0.984227,0.984227,0.962145,0.962145	NCBI Hits Summary
OTU5	Eukaryota;Stramenopiles;	Eukaryota;SAR;Stramenopiles;Ochrophyta;Eustigmatophyceae;Eustigmatales;Nannochloropsis;	Eukaryota;Ochrophyta_ph;Eustigmatophyceae;Eustigmatales;Eustigmatales_fa;Nannochloropsis	3408	0.00643602	Eustigmatophyceae	AF045042,GQ122355,KC594687	0.996914,0.996914,0.993827	NCBI Hits Summary
OTU17	Eukaryota;Stramenopiles;Bacillariophyta;Fragilariophyceae;Fragilariophycidae;	Eukaryota;SAR;Stramenopiles;Ochrophyta;Diatomea;	Eukaryota;Diatomea;Bacillariophyceae;Bacillariophyceae_or;Bacillariophyceae_fa;Diatoma	3400	0.00894691	Bacillariophyceae	EF423403	1	NCBI Hits Summary
OTU32	Eukaryota;Stramenopiles;Bacillariophyta;Fragilariophyceae;Fragilariophycidae;	Eukaryota;SAR;Stramenopiles;Ochrophyta;Diatomea;Coscinodiscophytina;Fragilariales;Fragilaria;	Eukaryota;Diatomea;Coscinodiscophytina_cl;Fragilariales;Fragilariales_fa;Fragilariales_fa_unclassified	3342	0.0179683	Bacillariophyceae	EF465469,AJ971376,AM497722,EF465478,AJ535137,AM497738,EF423405,AM497721	0.993884,0.993884,0.993884,0.993884,0.993884,0.993884,0.990826,0.990826	NCBI Hits Summary
OTU27	Unclassified;	Eukaryota;SAR;Stramenopiles;Ochrophyta;Chrysophyceae;	Eukaryota;Ochrophyta_ph;Chrysophyceae;Chrysophyceae_unclassified;Chrysophyceae_unclassified;Chrysophyceae_unclassified	2843	0.0156707	Chrysophyceae	EF165134	0.981707	NCBI Hits Summary
OTU7	Eukaryota;Alveolata;Ciliophora;Intramacronucleata;Spirotrichea;Choreotrichia;Tintinnida;	Eukaryota;SAR;Alveolata;Ciliophora;Intramacronucleata;Spirotrichea;Choreotrichia;	Eukaryota;Ciliophora;Intramacronucleata;Spirotrichea;Choreotrichia;Choreotrichia_unclassified	2769	0.0144004	Ciliophora	KF662622,JQ924053,DQ487193,JX567470,FJ196072	0.965517,0.965517,0.965517,0.962382,0.959248	NCBI Hits Summary
OTU19	Eukaryota;Alveolata;Ciliophora;Intramacronucleata;	Eukaryota;SAR;Alveolata;Ciliophora;Intramacronucleata;Conthreep;Oligohymenophorea;Peniculia;	Eukaryota;Ciliophora;Intramacronucleata;Conthreep;Oligohymenophorea;Stokesia	2370	0.0108475	Ciliophora	HM030738,MF926593	0.95356,0.947368	NCBI Hits Summary
OTU18	Unclassified;	Unclassified;	Eukaryota;Eukaryota_unclassified;Eukaryota_unclassified;Eukaryota_unclassified;Eukaryota_unclassified;Eukaryota_unclassified	2122	0.0101676	Apicomplexa	HQ891115,HQ891114,HQ891116,AY605184		NCBI Hits Summary
OTU43	Eukaryota;	Eukaryota;Archaeplastida;Chloroplastida;Chlorophyta;	Eukaryota;Chlorophyta_ph;Chlorophyta_ph_unclassified;Chlorophyta_ph_unclassified;Chlorophyta_ph_unclassified;Chlorophyta_ph_unclassified	1959	0.00708607	Chlorophyta	HQ191395,JN090900	0.981707,0.972561	NCBI Hits Summary
OTU13	Eukaryota;	Eukaryota;SAR;Rhizaria;Cercozoa;Thecofilosea;	Eukaryota;Cercozoa;Cercozoa_unclassified;Cercozoa_unclassified;Cercozoa_unclassified;Cercozoa_unclassified	1897	0.00623257	Cercozoa	KC771152,KC771151	0.98494,0.98494	NCBI Hits Summary
OTU29	Eukaryota;	Eukaryota;SAR;Stramenopiles;Ochrophyta;Chrysophyceae;	Eukaryota;Ochrophyta_ph;Chrysophyceae;Chrysophyceae_unclassified;Chrysophyceae_unclassified;Chrysophyceae_unclassified	1885	0.0134179	Chrysophyceae	HG315742,AB749076,EF185316,AY651071	0.963415,0.963415,0.948171	NCBI Hits Summary
OTU25	Eukaryota;environmental samples;	Eukaryota;SAR;Rhizaria;Cercozoa;Thecofilosea;Ebriacea;Ebria;	Eukaryota;Cercozoa;Cercozoa_unclassified;Cercozoa_unclassified;Cercozoa_unclassified;Cercozoa_unclassified	1834	0.00990463	Cercozoa	JN090861,KJ925395	0.958084,0.931138	NCBI Hits Summary
OTU36	Eukaryota;Stramenopiles;Chrysophyceae;	Eukaryota;SAR;Stramenopiles;Ochrophyta;Chrysophyceae;	Eukaryota;Ochrophyta_ph;Chrysophyceae;Chrysophyceae_unclassified;Chrysophyceae_unclassified;Chrysophyceae_unclassified	1758	0.0111353	Chrysophyceae	MG674913,AB749145,AY651092,FPLS01004254	0.966463,0.957317,0.957317,0.957317	NCBI Hits Summary
OTU158	Eukaryota;	Eukaryota;SAR;Alveolata;Dinoflagellata;Dinophyceae;	Eukaryota;Dinoflagellata;Dinophyceae;Gymnodiniphycidae;Gymnodiniphycidae_unclassified;Gymnodiniphycidae_unclassified	1746	0.0046645	Dinoflagellata	KJ758334,KJ758106,KJ757816,KJ757777,HG005135,KJ763394,AF022199,GU295203	0.969512,0.966463,0.966463,0.966463,0.966463,0.966463,0.966463,0.966463	NCBI Hits Summary
OTU37	Unclassified;	Eukaryota;SAR;Alveolata;Ciliophora;Intramacronucleata;Conthreep;Prostomatea;Cryptocaryon;	Eukaryota;Ciliophora;Intramacronucleata;Conthreep;Prostomatea;Cryptocaryon	1736	0.00972599	Ciliophora	KJ761752,LC424403	0.949843,0.943574	NCBI Hits Summary
OTU40	Eukaryota;Alveolata;Ciliophora;Intramacronucleata;Oligohymenophorea;Scuticociliatia;Pleuronematida;	Eukaryota;SAR;Alveolata;Ciliophora;Intramacronucleata;Conthreep;Oligohymenophorea;Scuticociliatia;	Eukaryota;Ciliophora;Intramacronucleata;Conthreep;Oligohymenophorea;Pseudocohnilembus	1649	0.00808845	Ciliophora	JX310013,FJ848873	0.962264,0.927673	NCBI Hits Summary
OTU78	Eukaryota;Stramenopiles;Bacillariophyta;Fragilariophyceae;Fragilariophycidae;	Eukaryota;SAR;Stramenopiles;Ochrophyta;Diatomea;Coscinodiscophytina;Fragilariales;Fragilaria;	Eukaryota;Diatomea;Coscinodiscophytina_cl;Fragilariales;Fragilariales_fa;Fragilariales_fa_unclassified	1542	0.0070563	Bacillariophyceae	AM497722,AJ535137,EF465469,EF465478,AM497738,AM497721,EF423405	0.975831,0.975831,0.975831,0.975831,0.975831,0.97281,0.97281	NCBI Hits Summary
OTU35	Eukaryota;	Eukaryota;SAR;Alveolata;Ciliophora;Intramacronucleata;Spirotrichea;	Eukaryota;Ciliophora;Intramacronucleata;Spirotrichea;Spirotrichea_unclassified;Spirotrichea_unclassified	1467	0.00711089	Ciliophora	GU290112,KR263893,FJ881862,HQ219462	0.943925,0.931464,0.931464,0.925234	NCBI Hits Summary
OTU8	Eukaryota;	Eukaryota;SAR;Stramenopiles;Ochrophyta;Diatomea;Bacillariophytina;Bacillariophyceae;	Eukaryota;Diatomea;Bacillariophyceae;Bacillariophyceae_or;Bacillariophyceae_fa;Nitzschia	1449	0.003811	Bacillariophyceae	KC771177,KC771173,KC771164,KC771191,AY485457,KC771171,KC771170,HM805036	0.99696,0.99696,0.99696,0.99696,0.993921,0.993921,0.993921,0.993921	NCBI Hits Summary
OTU23	Eukaryota;Viridiplantae;Chlorophyta;Chlorophyceae;Chlamydomonadales;	Eukaryota;Archaeplastida;Chloroplastida;Chlorophyta;Chlorophyceae;Chlamydomonadales;	Eukaryota;Chlorophyta_ph;Chlorophyceae;Chlorophyceae_or;Chlorophyceae_fa;Chlorophyceae_ge	1250	0.00833656	Chlorophyta	AF514405,AB058371,AY731083	1,0.966463,0.966463	NCBI Hits Summary
OTU41	Unclassified;	Eukaryota;SAR;Alveolata;Ciliophora;Intramacronucleata;Spirotrichea;Oligotrichia;	Eukaryota;Ciliophora;Intramacronucleata;Spirotrichea;Oligotrichia;Oligotrichia_unclassified	1248	0.00613829	Ciliophora	FPLK01000763,FPLK01003043	0.987539,0.987539	NCBI Hits Summary
OTU46	Unclassified;	Eukaryota;Cryptophyceae;Cryptomonadales;Cryptomonas;	Eukaryota;Cryptophyceae_ph;Cryptophyceae_cl;Cryptomonadales;Cryptomonadales_fa;Cryptomonadales_fa_unclassified	1117	0.0033247	Cryptophyceae	FPLK01001319,L28811	0.957317,0.939024	NCBI Hits Summary
OTU14	Eukaryota;	Eukaryota;SAR;Alveolata;Ciliophora;Intramacronucleata;Spirotrichea;	Eukaryota;Ciliophora;Intramacronucleata;Spirotrichea;Spirotrichea_unclassified;Spirotrichea_unclassified	1065	0.0054932	Ciliophora	GU290112,JX461344	0.928571,0.916149	NCBI Hits Summary
OTU47	Eukaryota;Viridiplantae;Chlorophyta;Chlorophyceae;Chaetophorales;	Eukaryota;Archaeplastida;Chloroplastida;Chlorophyta;Chlorophyceae;Chaetophorales;	Eukaryota;Chlorophyta_ph;Chlorophyta_ph_unclassified;Chlorophyta_ph_unclassified;Chlorophyta_ph_unclassified;Chlorophyta_ph_unclassified	995	0.00481337	Chlorophyta	FR865749,FN824371,U83130	0.972561,0.972561,0.972561	NCBI Hits Summary
OTU11	Eukaryota;	Eukaryota;SAR;Stramenopiles;Ochrophyta;Diatomea;Bacillariophytina;Bacillariophyceae;	Eukaryota;Diatomea;Bacillariophyceae;Bacillariophyceae_or;Bacillariophyceae_fa;Bacillariophyceae_fa_unclassified	985	0.00312125	Bacillariophyceae	AM501966,KC771164,KC771177,KC771191,HM805036,KC771171,DQ310201,KC771170	0.96988,0.96988,0.96988,0.96988,0.96988,0.96988,0.966867,0.966867	NCBI Hits Summary
OTU24	Eukaryota;	Eukaryota;SAR;Stramenopiles;Ochrophyta;Chrysophyceae;	Eukaryota;Ochrophyta_ph;Chrysophyceae;Chrysophyceae_unclassified;Chrysophyceae_unclassified;Chrysophyceae_unclassified	983	0.00543861	Chrysophyceae	MG674913,AF123293,AB749105	0.960366,0.957317,0.954268	NCBI Hits Summary
OTU59	Eukaryota;	Eukaryota;SAR;Stramenopiles;Ochrophyta;Chrysophyceae;Ochromonadales;Paraphysomonas;	Eukaryota;Ochrophyta_ph;Chrysophyceae;Ochromonadales;Ochromonadales_fa;Paraphysomonas	851	0.00427745	Chrysophyceae	AY642717,DQ103873,DQ103782,DQ103874,AF109322,DQ103808	1,0.957447,0.957447,0.957447,0.957447,0.957447	NCBI Hits Summary
OTU10	Eukaryota;	Eukaryota;SAR;Alveolata;Ciliophora;Intramacronucleata;Spirotrichea;	Eukaryota;Ciliophora;Intramacronucleata;Spirotrichea;Spirotrichea_unclassified;Spirotrichea_unclassified	799	0.00690743	Ciliophora	GU290112	0.928125	NCBI Hits Summary
OTU15	Unclassified;	Eukaryota;SAR;Alveolata;Ciliophora;Intramacronucleata;Spirotrichea;Oligotrichia;	Eukaryota;Ciliophora;Intramacronucleata;Spirotrichea;Oligotrichia;Oligotrichia_unclassified	743	0.00138943	Ciliophora	FPLK01002665	0.987578	NCBI Hits Summary
OTU82	Unclassified;	Eukaryota;SAR;Stramenopiles;Ochrophyta;Chrysophyceae;	Eukaryota;Ochrophyta_ph;Chrysophyceae;Ochromonadales;Ochromonadales_fa;Dinobryon	684	0.0042576	Chrysophyceae	AF123289,FPLS01038393	1,0.957317	NCBI Hits Summary
OTU57	Eukaryota;Stramenopiles;Synurophyceae;Synurales;Mallomonadaceae;	Eukaryota;SAR;Stramenopiles;Ochrophyta;Chrysophyceae;Synurales;	Eukaryota;Ochrophyta_ph;Chrysophyceae;Synurales;Synurales_fa;Synurales_fa_unclassified	617	0.00348349	Chrysophyceae	U73225,U73229	0.978659,0.97561	NCBI Hits Summary
OTU144	Eukaryota;	Eukaryota;SAR;Alveolata;Dinoflagellata;Dinophyceae;Gymnodiniphycidae;	Eukaryota;Dinoflagellata;Dinophyceae;Dinophyceae_unclassified;Dinophyceae_unclassified;Dinophyceae_unclassified	604	0.00159784	Dinoflagellata	GU295203	0.966667	NCBI Hits Summary
OTU26	Unclassified;	Eukaryota;SAR;Stramenopiles;Ochrophyta;Chrysophyceae;	Eukaryota;Ochrophyta_ph;Chrysophyceae;Chrysophyceae_unclassified;Chrysophyceae_unclassified;Chrysophyceae_unclassified	590	0.00319568	Chrysophyceae	FPLS01038393,U73229,M87331,EF165132	0.966463,0.957317,0.957317,0.957317	NCBI Hits Summary
OTU66	Eukaryota;Viridiplantae;Chlorophyta;	Eukaryota;Archaeplastida;Chloroplastida;Chlorophyta;	Eukaryota;Chlorophyta_ph;Trebouxiophyceae;Trebouxiophyceae_or;Trebouxiophyceae_fa;Trebouxiophyceae_ge	494	0.00084358	Chlorophyta/Trebouxiophyceae	AB080305	1	NCBI Hits Summary
OTU28	Eukaryota;environmental samples;	Eukaryota;SAR;Alveolata;Ciliophora;Intramacronucleata;Spirotrichea;Oligotrichia;	Eukaryota;Ciliophora;Intramacronucleata;Spirotrichea;Oligotrichia;Oligotrichia_unclassified	491	0.0027987	Ciliophora	KJ761989,KJ761751,KJ763881,KJ760877,KJ757562,KT730064,KJ757113,KC771186	0.972136,0.972136,0.972136,0.972136,0.96904,0.96904,0.96904,0.96904	NCBI Hits Summary
OTU55	Eukaryota;	Eukaryota;SAR;Rhizaria;Cercozoa;Thecofilosea;	Eukaryota;Cercozoa;Cercozoa_unclassified;Cercozoa_unclassified;Cercozoa_unclassified;Cercozoa_unclassified	450	0.0013795	Cercozoa	FJ824124	0.939759	NCBI Hits Summary
OTU39	Eukaryota;Stramenopiles;	Eukaryota;SAR;Stramenopiles;Ochrophyta;Chrysophyceae;	Eukaryota;Ochrophyta_ph;Chrysophyceae;Chrysophyceae_or;Chrysophyceae_fa;Chrysophyceae_ge	412	0.00108177	Chrysophyceae	FM955256	1	NCBI Hits Summary
OTU34	Eukaryota;Stramenopiles;Synurophyceae;Synurales;Mallomonadaceae;	Eukaryota;SAR;Stramenopiles;Ochrophyta;Chrysophyceae;Synurales;	Eukaryota;Ochrophyta_ph;Chrysophyceae;Synurales;Synurales_fa;Mallomonas	408	0.00202956	Chrysophyceae	U73232,KY942077,U73225,DQ487199,M55285	0.981707,0.978659,0.97561,0.97561,0.97561	NCBI Hits Summary
OTU466	Unclassified;	Eukaryota;SAR;Alveolata;	Eukaryota;Eukaryota_unclassified;Eukaryota_unclassified;Eukaryota_unclassified;Eukaryota_unclassified;Eukaryota_unclassified	390	0.00205933	Dinoflagellata	AB120004,FLLY01000077,KJ757950,KJ762691,KJ762321,KJ758503,KJ762416,KJ763097,KJ762846	0.951219,0.951219,0.951219,0.948171,0.948171,0.948171,0.948171,0.948171	NCBI Hits Summary
OTU67	Eukaryota;Stramenopiles;Chrysophyceae;	Eukaryota;SAR;Stramenopiles;Ochrophyta;Chrysophyceae;	Eukaryota;Ochrophyta_ph;Chrysophyceae;Chrysophyceae_unclassified;Chrysophyceae_unclassified;Chrysophyceae_unclassified	362	0.00155318	Chrysophyceae	M87332	0.969512	NCBI Hits Summary
OTU309	Eukaryota;environmental samples;	Eukaryota;SAR;Alveolata;	Eukaryota;Dinoflagellata;Dinophyceae;Dinophyceae_unclassified;Dinophyceae_unclassified;Dinophyceae_unclassified	362	0.00175663	Dinoflagellata	KJ762571,KJ757926,KJ762196,KJ757673,KJ757867,KJ762277,HM581709,KJ759327	0.942424,0.942424,0.942424,0.939394,0.939394,0.939394,0.939394,0.939394	NCBI Hits Summary
OTU70	Eukaryota;	Eukaryota;Incertae Sedis;Telonema;	Eukaryota;Incertae_Sedis_ph;Incertae_Sedis_cl;Incertae_Sedis_or;Incertae_Sedis_fa;Telonema	346	0.0017219	SAR/Telonema	HQ191379,KJ763137	0.960843,0.954819	NCBI Hits Summary
OTU68	Unclassified;	Eukaryota;SAR;Stramenopiles;Ochrophyta;Chrysophyceae;	Eukaryota;Ochrophyta_ph;Chrysophyceae;Chrysophyceae_unclassified;Chrysophyceae_unclassified;Chrysophyceae_unclassified	343	0.00185091	Chrysophyceae	FPLK01002545	0.972561	NCBI Hits Summary
OTU38	Unclassified;	Unclassified;	Eukaryota;Eukaryota_unclassified;Eukaryota_unclassified;Eukaryota_unclassified;Eukaryota_unclassified;Eukaryota_unclassified	331	0.00172686	Eukaryota_unclassified			NCBI Hits Summary
OTU58	Eukaryota;	Eukaryota;SAR;Alveolata;Ciliophora;Intramacronucleata;Spirotrichea;	Eukaryota;Ciliophora;Intramacronucleata;Spirotrichea;Choreotrichia;Choreotrichia_unclassified	319	0.00247119	Ciliophora	GU290112,AY498652,KU525298,LN870020	0.937888,0.919255,0.919255,0.919255	NCBI Hits Summary
OTU61	Unclassified;	Unclassified;	Eukaryota;Eukaryota_unclassified;Eukaryota_unclassified;Eukaryota_unclassified;Eukaryota_unclassified;Eukaryota_unclassified	317	0.00108177	Eukaryota_unclassified	AY605189		NCBI Hits Summary
OTU75	Eukaryota;	Eukaryota;Amorphea;Obazoa;Opisthokonta;Nucletmycea;Fungi;Cryptomycota;LKM11;	Eukaryota;Eukaryota_unclassified;Eukaryota_unclassified;Eukaryota_unclassified;Eukaryota_unclassified;Eukaryota_unclassified	309	0.00165739	Cryptomycota	EU162624,DQ244016,LC109026	0.98452,0.96904,0.959752	NCBI Hits Summary
OTU213	Eukaryota;	Eukaryota;SAR;Stramenopiles;Ochrophyta;Diatomea;Bacillariophytina;Bacillariophyceae;	Eukaryota;Diatomea;Bacillariophyceae;Bacillariophyceae_or;Bacillariophyceae_fa;Nitzschia	299	0.00188069	Bacillariophyceae	AJ867278,Y10566,AY881968,KC771177,AJ867279,KC771164	0.978723,0.975684,0.972644,0.972644,0.972644,0.972644	NCBI Hits Summary
OTU42	Eukaryota;	Eukaryota;SAR;Alveolata;Ciliophora;Intramacronucleata;Spirotrichea;Choreotrichia;	Eukaryota;Ciliophora;Intramacronucleata;Spirotrichea;Choreotrichia;Choreotrichia_unclassified	298	0.00079892	Ciliophora	LN870020,GU067892	0.978193,0.953271	NCBI Hits Summary
OTU154	Eukaryota;	Eukaryota;SAR;Alveolata;	Eukaryota;Dinoflagellata;Dinoflagellata_unclassified;Dinoflagellata_unclassified;Dinoflagellata_unclassified;Dinoflagellata_unclassified	293	0.000932901	Dinoflagellata	KJ762571,HM581709,EU371138,KJ762277,JF791024,KJ757673,KJ763337,JF791060	0.966667,0.963636,0.963636,0.963636,0.963636,0.963636,0.963636,0.963636	NCBI Hits Summary
OTU49	Eukaryota;	Eukaryota;SAR;Alveolata;Dinoflagellata;Dinophyceae;	Eukaryota;Dinoflagellata;Dinophyceae;Gymnodiniphycidae;Suessiaceae;Biecheleria	278	0.00167724	Dinoflagellata	EU162619	0.966565	NCBI Hits Summary
OTU99	Eukaryota;	Eukaryota;Amorphea;Obazoa;Opisthokonta;Nucletmycea;Fungi;Chytridiomycota;Incertae Sedis;Chytridiomycetes;	Eukaryota;Chytridiomycota;Chytridiomycetes;Rhizophydiales;Rhizophydiaceae;Rhizophydium	274	0.000739373	Chytridiomycota	DQ103819	0.951662	NCBI Hits Summary
OTU168	Eukaryota;environmental samples;	Eukaryota;SAR;Alveolata;Dinoflagellata;	Eukaryota;Dinoflagellata;Dinophyceae;Dinophyceae_unclassified;Dinophyceae_unclassified;Dinophyceae_unclassified	266	0.000734411	Dinoflagellata	KJ758039,KJ763588,KJ758372	0.969697,0.969697,0.963636	NCBI Hits Summary
OTU72	Eukaryota;	Eukaryota;SAR;Alveolata;Dinoflagellata;Dinophyceae;Gymnodiniphycidae;	Eukaryota;Dinoflagellata;Dinophyceae;Gymnodiniphycidae;Suessiaceae;Suessiaceae_unclassified	261	0.00148867	Dinoflagellata	GU067954,GU290072	0.978788,0.966667	NCBI Hits Summary
OTU45	Eukaryota;	Eukaryota;	Eukaryota;Eukaryota_unclassified;Eukaryota_unclassified;Eukaryota_unclassified;Eukaryota_unclassified;Eukaryota_unclassified	256	0.00051111	Cryptophyceae	JX869389,JX869388,HQ191348,HQ191366,MW139959,MW139922	0.963303	NCBI Hits Summary
OTU196	Eukaryota;environmental samples;	Eukaryota;SAR;Alveolata;Dinoflagellata;	Eukaryota;Dinoflagellata;Dinophyceae;Dinophyceae_unclassified;Dinophyceae_unclassified;Dinophyceae_unclassified	256	0.000650053	Dinoflagellata	KJ758217,KJ758318,KJ762844,KJ759088,KJ758345,KJ757751,KJ758039	0.978788,0.978788,0.978788,0.975758,0.975758,0.975758,0.975758	NCBI Hits Summary
OTU343	Eukaryota;	Eukaryota;SAR;Alveolata;Dinoflagellata;Dinophyceae;Gymnodiniphycidae;	Eukaryota;Dinoflagellata;Dinophyceae;Gymnodiniphycidae;Gymnodinium_clade;Gymnodinium_clade_unclassified	238	0.000655015	Dinoflagellata	GU295203,KJ757816,KJ758334,AB626150,KJ758152,AF022199,KJ763394	0.963636,0.960606,0.960606,0.960606,0.960606,0.957576,0.957576	NCBI Hits Summary
OTU51	Unclassified;	Eukaryota;SAR;Alveolata;	Eukaryota;Protalveolata;Perkinsidae;A31;A31_fa;A31_ge	236	0.00128026	Perkinsidae	EU162617	0.981538	NCBI Hits Summary
OTU203	Eukaryota;Stramenopiles;	Eukaryota;SAR;Stramenopiles;Ochrophyta;Diatomea;Bacillariophytina;Mediophyceae;Thalassiosira;	Eukaryota;Diatomea;Mediophyceae;Mediophyceae_or;Mediophyceae_fa;Mediophyceae_fa_unclassified	232	0.000808845	Bacillariophyceae	AB831892,AB831890,DQ093369,DQ093366,KT347147,EU050968,HM991689,HM991694,AJ810859	0.969512,0.969512,0.969512,0.966463,0.966463,0.966463,0.966463,0.966463	NCBI Hits Summary
OTU76	Eukaryota;Alveolata;	Eukaryota;SAR;Alveolata;Dinoflagellata;Dinophyceae;	Eukaryota;Dinoflagellata;Dinophyceae;Dinophyceae_unclassified;Dinophyceae_unclassified;Dinophyceae_unclassified	219	0.000833656	Dinoflagellata	EF058253,JQ616823,EU162619,AY551273	0.954545,0.930303,0.930303,0.930303	NCBI Hits Summary
OTU79	Eukaryota;Viridiplantae;Chlorophyta;Trebouxiophyceae;Chlorellales;Chlorellaceae;	Eukaryota;Archaeplastida;Chloroplastida;Chlorophyta;Trebouxiophyceae;	Eukaryota;Chlorophyta_ph;Chlorophyta_ph_unclassified;Chlorophyta_ph_unclassified;Chlorophyta_ph_unclassified;Chlorophyta_ph_unclassified	217	0.000640129	Chlorophyta/Trebouxiophyceae	FM205842,MF070534	0.978723,0.972644	NCBI Hits Summary
OTU62	Eukaryota;Viridiplantae;Chlorophyta;Chlorophyceae;Sphaeropleales;	Eukaryota;Archaeplastida;Chloroplastida;Chlorophyta;Chlorophyceae;Sphaeropleales;	Eukaryota;Chlorophyta_ph;Chlorophyceae;Chlorophyceae_or;Chlorophyceae_fa;Chlorophyceae_ge	216	0.00112147	Chlorophyta	KF673373,KP017571,Y17924,HM483517,KF673366,X91263,AY846382	0.987768,0.987768,0.987768,0.981651,0.981651,0.981651,0.978593	NCBI Hits Summary
OTU214	Eukaryota;	Eukaryota;SAR;Alveolata;	Eukaryota;Dinoflagellata;Dinophyceae;Dinophyceae_unclassified;Dinophyceae_unclassified;Dinophyceae_unclassified	214	0.000898165	Dinoflagellata	KC771146,AY590483,EF417316,EF417314	0.993808,0.981424	NCBI Hits Summary
OTU56	Eukaryota;Stramenopiles;Bacillariophyta;Bacillariophyceae;Bacillariophycidae;Cymbellales;	Eukaryota;SAR;Stramenopiles;Ochrophyta;Diatomea;Bacillariophytina;Bacillariophyceae;	Eukaryota;Diatomea;Bacillariophyceae;Bacillariophyceae_or;Bacillariophyceae_fa;Gomphonema	211	0.000962674	Bacillariophyceae	AM502005	1	NCBI Hits Summary
OTU94	Eukaryota;Viridiplantae;Chlorophyta;Trebouxiophyceae;	Eukaryota;Archaeplastida;Chloroplastida;Chlorophyta;Trebouxiophyceae;	Eukaryota;Chlorophyta_ph;Trebouxiophyceae;Trebouxiophyceae_or;Trebouxiophyceae_fa;Trebouxiophyceae_ge	207	0.000650053	Chlorophyta/Trebouxiophyceae	AB080306,AB080305	0.99697,0.951515	NCBI Hits Summary
OTU106	Unclassified;	Eukaryota;SAR;Rhizaria;Cercozoa;Thecofilosea;uncultured;	Eukaryota;Cercozoa;Cercozoa_unclassified;Cercozoa_unclassified;Cercozoa_unclassified;Cercozoa_unclassified	206	0.00112643	Cercozoa	EF526980	0.924242	NCBI Hits Summary
OTU316	Eukaryota;	Eukaryota;SAR;Alveolata;Dinoflagellata;Dinophyceae;	Eukaryota;Dinoflagellata;Dinophyceae;Dinophyceae_unclassified;Dinophyceae_unclassified;Dinophyceae_unclassified	206	0.000818769	Dinoflagellata	KC771146,AY590483,AY251288	0.984472,0.981366,0.981366	NCBI Hits Summary
OTU50	Unclassified;	Eukaryota;SAR;Alveolata;	Eukaryota;Eukaryota_unclassified;Eukaryota_unclassified;Eukaryota_unclassified;Eukaryota_unclassified;Eukaryota_unclassified	197	0.000456526	Dinoflagellata	AY829526,AY827953,FPLK01002358	0.975232,0.959752	NCBI Hits Summary
OTU60	Eukaryota;Viridiplantae;Chlorophyta;	Eukaryota;Archaeplastida;Chloroplastida;Chlorophyta;Trebouxiophyceae;	Eukaryota;Chlorophyta_ph;Trebouxiophyceae;Trebouxiophyceae_or;Trebouxiophyceae_fa;Trebouxiophyceae_ge	188	0.000650053	Chlorophyta/Trebouxiophyceae	AB903011,LC371411	1,1	NCBI Hits Summary
OTU89	Unclassified;	Eukaryota;SAR;Rhizaria;Cercozoa;Thecofilosea;uncultured;	Eukaryota;Cercozoa;Cercozoa_unclassified;Cercozoa_unclassified;Cercozoa_unclassified;Cercozoa_unclassified	180	0.000913052	Cercozoa	EU371159	0.936556	NCBI Hits Summary
OTU80	Eukaryota;	Eukaryota;SAR;Alveolata;Ciliophora;Intramacronucleata;Conthreep;Prostomatea;Cryptocaryon;	Eukaryota;Ciliophora;Intramacronucleata;Intramacronucleata_unclassified;Intramacronucleata_unclassified;Intramacronucleata_unclassified	177	0.00122071	Ciliophora	FJ876971	0.950464	NCBI Hits Summary
OTU601	Eukaryota;Viridiplantae;Chlorophyta;Trebouxiophyceae;	Eukaryota;Archaeplastida;Chloroplastida;Chlorophyta;Trebouxiophyceae;	Eukaryota;Chlorophyta_ph;Trebouxiophyceae;Trebouxiophyceae_or;Trebouxiophyceae_fa;Trebouxiophyceae_ge	173	0.000297734	Chlorophyta/Trebouxiophyceae	AY195972	0.978788	NCBI Hits Summary
OTU112	Unclassified;	Eukaryota;Amorphea;Amoebozoa;SAR;Stramenopiles;Labyrinthulomycetes;Sorodiplophrys;	Eukaryota;Eukaryota_unclassified;Eukaryota_unclassified;Eukaryota_unclassified;Eukaryota_unclassified;Eukaryota_unclassified	171	0.000446601	Eukaryota_unclassified	AY919687,FPLS01016464	0.922156	NCBI Hits Summary
OTU793	Eukaryota;environmental samples;	Eukaryota;SAR;Alveolata;	Eukaryota;Eukaryota_unclassified;Eukaryota_unclassified;Eukaryota_unclassified;Eukaryota_unclassified;Eukaryota_unclassified	171	0.000793958	Eukaryota_unclassified	KJ758961,KJ758231,KJ757926,KJ762571,KF129687,KJ759327,KJ758255	0.945455,0.942424,0.942424,0.942424,0.939394,0.939394,0.939394	NCBI Hits Summary
OTU104	Eukaryota;Stramenopiles;Oomycetes;	Eukaryota;SAR;Stramenopiles;Peronosporomycetes;	Eukaryota;Peronosporomycetes;Peronosporomycetes_cl;Peronosporomycetes_or;Peronosporomycetes_fa;Peronosporomycetes_fa_unclassified	169	0.000922976	Peronosporomycetes	X54266	0.981982	NCBI Hits Summary
OTU208	Eukaryota;	Eukaryota;SAR;Alveolata;	Eukaryota;Dinoflagellata;Dinophyceae;Dinophyceae_unclassified;Dinophyceae_unclassified;Dinophyceae_unclassified	158	0.00109665	Dinoflagellata	KJ757613,KJ757673,KJ763641,KJ764212,KJ761221,JF791024,HM581709,EF492511,EU371138	0.981818,0.981818,0.981818,0.981818,0.981818,0.981818,0.981818,0.981818,0.981818	NCBI Hits Summary
OTU95	Eukaryota;Fungi;Dikarya;Ascomycota;Pezizomycotina;Dothideomycetes;Pleosporomycetidae;Pleosporales;Pleosporineae;Didymellaceae;	Eukaryota;Amorphea;Obazoa;Opisthokonta;Nucletmycea;Fungi;Dikarya;Ascomycota;Pezizomycotina;Dothideomycetes;Pleosporales;Didymellaceae;	Eukaryota;Ascomycota;Dothideomycetes;Pleosporales;Leptosphaeriaceae;Neophaeosphaeria	155	0.000416828	Ascomycota	EU167567,EU167575,AB303549,EU167559,EU342933,EU342888,EU342932	0.996997,0.993994,0.993994,0.993994,0.990991,0.990991,0.990991	NCBI Hits Summary
OTU44	Eukaryota;	Eukaryota;SAR;Stramenopiles;Ochrophyta;Diatomea;Bacillariophytina;Bacillariophyceae;	Eukaryota;Diatomea;Bacillariophyceae;Bacillariophyceae_or;Bacillariophyceae_fa;Encyonema	153	0.000714562	Bacillariophyceae	AM501961	1	NCBI Hits Summary
OTU77	Unclassified;	Eukaryota;SAR;Stramenopiles;Ochrophyta;Chrysophyceae;	Eukaryota;Ochrophyta_ph;Chrysophyceae;Chrysophyceae_unclassified;Chrysophyceae_unclassified;Chrysophyceae_unclassified	153	0.000828694	Chrysophyceae	AY651079,AY651081,FPLS01055925	0.981595,0.978528,0.978528	NCBI Hits Summary
OTU52	Eukaryota;	Eukaryota;SAR;Alveolata;Dinoflagellata;Dinophyceae;	Eukaryota;Dinoflagellata;Dinophyceae;Peridiniphycidae_or;Thoracosphaeraceae;Scrippsiella	151	0.000555771	Dinoflagellata	KC771146,KJ758195,KJ758066,KJ762730,KR535601,KJ763731,KJ758116	0.957576,0.948485,0.948485,0.945455,0.945455,0.945455,0.945455	NCBI Hits Summary
OTU85	Eukaryota;	Eukaryota;SAR;Alveolata;Ciliophora;Intramacronucleata;Conthreep;Prostomatea;Cryptocaryon;	Eukaryota;Ciliophora;Intramacronucleata;Conthreep;Prostomatea;Cryptocaryon	150	0.000764185	Ciliophora	AY642698,KJ761752	0.968652,0.959248	NCBI Hits Summary
OTU48	Eukaryota;	Eukaryota;SAR;Alveolata;Ciliophora;Intramacronucleata;Conthreep;Prostomatea;Cryptocaryon;	Eukaryota;Ciliophora;Intramacronucleata;Conthreep;Prostomatea;Cryptocaryon	146	0.000937863	Ciliophora	KC771341,KJ761752	0.974763,0.971609	NCBI Hits Summary
OTU64	Eukaryota;	Eukaryota;Cryptophyceae;Cryptomonadales;	Eukaryota;Cryptophyceae_ph;Cryptophyceae_cl;Cryptomonadales;Cryptomonadales_fa;Plagioselmis	142	0.000555771	Cryptophyceae	GU067889,HQ111513,EF432522	1,0.963303,0.963303	NCBI Hits Summary
OTU71	Eukaryota;	Eukaryota;SAR;Stramenopiles;Ochrophyta;Chrysophyceae;	Eukaryota;Ochrophyta_ph;Chrysophyceae;Chrysophyceae_unclassified;Chrysophyceae_unclassified;Chrysophyceae_unclassified	140	0.000307659	Chrysophyceae	MG674913,AB749063,AB749145,M87332,AB749134,AB749105	0.957447,0.957447,0.957447,0.951368,0.948328,0.948328	NCBI Hits Summary
OTU126	Eukaryota;Stramenopiles;Bacillariophyta;Bacillariophyceae;Bacillariophycidae;	Eukaryota;SAR;Stramenopiles;Ochrophyta;Diatomea;Bacillariophytina;Bacillariophyceae;	Eukaryota;Diatomea;Bacillariophyceae;Bacillariophyceae_or;Bacillariophyceae_fa;Bacillariophyceae_fa_unclassified	140	0.000367206	Bacillariophyceae	AM502004,KF417658,AM501964	0.98471,0.972477,0.969419	NCBI Hits Summary
OTU53	Unclassified;	Eukaryota;SAR;Stramenopiles;Ochrophyta;Chrysophyceae;	Eukaryota;Ochrophyta_ph;Chrysophyceae;Chrysophyceae_unclassified;Chrysophyceae_unclassified;Chrysophyceae_unclassified	139	0.000352319	Chrysophyceae	MG674910,CEOE01007823,FPLS01022061	0.984756,0.97561,0.97561	NCBI Hits Summary
OTU119	Unclassified;	Eukaryota;SAR;Stramenopiles;Bicosoecida;Bicosoeca;	Eukaryota;Eukaryota_unclassified;Eukaryota_unclassified;Eukaryota_unclassified;Eukaryota_unclassified;Eukaryota_unclassified	138	0.000719524	Eukaryota_unclassified	EU162647,AY605212,FPLS01012068	0.966967,0.966967	NCBI Hits Summary
OTU92	Eukaryota;	Eukaryota;Cryptophyceae;Cryptomonadales;	Eukaryota;Cryptophyceae_ph;Cryptophyceae_cl;Cryptomonadales;Cryptomonadales_fa;Cryptomonadales_fa_unclassified	136	0.000406903	Cryptophyceae	JQ420121	0.987915	NCBI Hits Summary
OTU65	Eukaryota;	Eukaryota;SAR;Alveolata;Ciliophora;Intramacronucleata;Conthreep;Prostomatea;Cryptocaryon;	Eukaryota;Ciliophora;Intramacronucleata;Conthreep;Conthreep_unclassified;Conthreep_unclassified	134	0.00100733	Ciliophora	FJ876971	0.962733	NCBI Hits Summary
OTU773	Eukaryota;Alveolata;	Eukaryota;SAR;Alveolata;Ciliophora;Intramacronucleata;Spirotrichea;	Eukaryota;Ciliophora;Intramacronucleata;Spirotrichea;Spirotrichea_unclassified;Spirotrichea_unclassified	128	0.000650053	Ciliophora	EU162620,KC404828,AMCR01020474,AF164121,JQ924053,LASR02006853,KF662622	0.943574,0.934169,0.934169,0.934169,0.931035,0.931035,0.931035	NCBI Hits Summary
OTU84	Eukaryota;Stramenopiles;	Eukaryota;SAR;Stramenopiles;Ochrophyta;Chrysophyceae;	Eukaryota;Ochrophyta_ph;Chrysophyceae;Chrysophyceae_unclassified;Chrysophyceae_unclassified;Chrysophyceae_unclassified	127	0.000704638	Chrysophyceae	U73219,FR865768,EF165132,U73223,AY651089,U73232,AB749076	0.963415,0.963415,0.957317,0.957317,0.957317,0.957317,0.957317	NCBI Hits Summary
OTU88	Unclassified;	Eukaryota;SAR;Stramenopiles;Ochrophyta;Chrysophyceae;	Eukaryota;Ochrophyta_ph;Chrysophyceae;Chrysophyceae_unclassified;Chrysophyceae_unclassified;Chrysophyceae_unclassified	125	0.000684789	Chrysophyceae	AB749076	0.996951	NCBI Hits Summary
OTU69	Eukaryota;	Eukaryota;SAR;Alveolata;Ciliophora;Intramacronucleata;Litostomatea;	Eukaryota;Ciliophora;Intramacronucleata;Litostomatea;Haptoria;Didinium	122	0.00104207	Ciliophora	DQ487196	0.990066	NCBI Hits Summary
OTU130	Eukaryota;	Eukaryota;SAR;Rhizaria;Cercozoa;Thecofilosea;	Eukaryota;Cercozoa;Thecofilosea;Cryomonadida;Rhizaspididae;Rhogostoma	115	0.000476375	Cercozoa	HM135090	0.918429	NCBI Hits Summary
OTU73	Eukaryota;Alveolata;Ciliophora;	Eukaryota;SAR;Alveolata;Ciliophora;Intramacronucleata;Litostomatea;Haptoria;	Eukaryota;Ciliophora;Intramacronucleata;Litostomatea;Haptoria;Arcuospathidium	114	0.00116116	Ciliophora	KX465194,JF263451,AB725341,JF263446,MG450793,JF263443,HM140392	0.99,0.983333,0.983333,0.983333,0.983333,0.983333,0.98	NCBI Hits Summary
OTU97	Eukaryota;	Eukaryota;SAR;Stramenopiles;Ochrophyta;Chrysophyceae;	Eukaryota;Ochrophyta_ph;Chrysophyceae;Chrysophyceae_unclassified;Chrysophyceae_unclassified;Chrysophyceae_unclassified	114	0.000382092	Chrysophyceae	MG674913,AB749145,AF123293,AB749134,AY651092	0.981707,0.969512,0.969512,0.963415,0.963415	NCBI Hits Summary
OTU54	Unclassified;	Eukaryota;SAR;Stramenopiles;Ochrophyta;Chrysophyceae;	Eukaryota;Ochrophyta_ph;Chrysophyceae;Chrysophyceae_or;Chrysophyceae_fa;Chrysophyceae_ge	109	0.000645091	Chrysophyceae	MG674913,FM955256,AB749105,AY651092,AF123293	0.987805,0.960366,0.957317,0.957317,0.957317	NCBI Hits Summary
OTU117	Eukaryota;Stramenopiles;Bacillariophyta;Fragilariophyceae;Fragilariophycidae;	Eukaryota;SAR;Stramenopiles;Ochrophyta;Diatomea;Coscinodiscophytina;Fragilariales;	Eukaryota;Diatomea;Coscinodiscophytina_cl;Fragilariales;Fragilariales_fa;Ulnaria	109	0.00109665	Bacillariophyceae	OM837381,EF423422,EF465476	0.969419,0.969419	NCBI Hits Summary
OTU113	Eukaryota;	Eukaryota;Amorphea;Obazoa;Opisthokonta;Nucletmycea;Fungi;Chytridiomycota;Incertae Sedis;Chytridiomycetes;Rhizophydiales;	Eukaryota;Chytridiomycota;Chytridiomycetes;Rhizophydiales;Rhizophydiaceae;Rhizophydiaceae_ge	108	0.000501186	Chytridiomycota	HQ191376,GQ995427,EU162640	0.963964,0.960961,0.960961	NCBI Hits Summary
OTU151	Eukaryota;	Eukaryota;SAR;Alveolata;	Eukaryota;Dinoflagellata;Dinophyceae;Dinophyceae_unclassified;Dinophyceae_unclassified;Dinophyceae_unclassified	108	0.000342394	Dinoflagellata	KC771146,AY590483	0.969697,0.960606	NCBI Hits Summary
OTU118	Unclassified;	Unclassified;	Eukaryota;Eukaryota_unclassified;Eukaryota_unclassified;Eukaryota_unclassified;Eukaryota_unclassified;Eukaryota_unclassified	105	0.000272923	Eukaryota_unclassified	AY919780		NCBI Hits Summary
OTU90	Eukaryota;	Eukaryota;SAR;Stramenopiles;Ochrophyta;Dictyochophyceae;Pedinellales;	Eukaryota;Ochrophyta_ph;Dictyochophyceae;Pedinellales;Pedinellales_fa;Pedinellales_ge	102	0.000163754	Dictyochophyceae	JN090870	0.957317	NCBI Hits Summary
OTU129	Eukaryota;	Eukaryota;SAR;Stramenopiles;Peronosporomycetes;	Eukaryota;Peronosporomycetes;Peronosporomycetes_cl;Peronosporomycetes_or;Peronosporomycetes_fa;Pythium	101	0.000392017	Peronosporomycetes	KJ716869	0.990991	NCBI Hits Summary
OTU469	Eukaryota;Viridiplantae;Chlorophyta;	Eukaryota;Archaeplastida;Chloroplastida;Chlorophyta;	Eukaryota;Eukaryota_unclassified;Eukaryota_unclassified;Eukaryota_unclassified;Eukaryota_unclassified;Eukaryota_unclassified	101	0.000486299	Chlorophyta	MF034628,MF034602,Z47996,FR865654,HQ850570,AM087962,M62995	0.920973,0.920973,0.920973,0.920973,0.908815,0.908815,0.908815	NCBI Hits Summary
OTU93	Unclassified;	Unclassified;	Eukaryota;Eukaryota_unclassified;Eukaryota_unclassified;Eukaryota_unclassified;Eukaryota_unclassified;Eukaryota_unclassified	100	0.000416828	Eukaryota_unclassified			NCBI Hits Summary
OTU520	Eukaryota;	Eukaryota;SAR;Stramenopiles;Ochrophyta;Diatomea;Bacillariophytina;Bacillariophyceae;	Eukaryota;Diatomea;Bacillariophyceae;Bacillariophyceae_or;Bacillariophyceae_fa;Bacillariophyceae_fa_unclassified	100	0.000262999	Bacillariophyceae	AM497725,KC771179,EF465465,KC771176,KC771173,KC771177,KC771178	0.972644,0.969605,0.969605,0.969605,0.966565,0.966565,0.966565	NCBI Hits Summary
OTU199	Eukaryota;Stramenopiles;Bacillariophyta;Coscinodiscophyceae;	Eukaryota;SAR;Stramenopiles;Ochrophyta;Diatomea;	Eukaryota;Diatomea;Coscinodiscophytina_cl;Coscinodiscophytina_or;Melosirids;Aulacoseira	98	0.000451564	Bacillariophyceae	AY121820	0.957704	NCBI Hits Summary
OTU91	Eukaryota;Fungi;Dikarya;Ascomycota;Pezizomycotina;Dothideomycetes;Pleosporomycetidae;Pleosporales;Pleosporineae;	Eukaryota;Amorphea;Obazoa;Opisthokonta;Nucletmycea;Fungi;Dikarya;Ascomycota;Pezizomycotina;Dothideomycetes;Pleosporales;	Eukaryota;Ascomycota;Dothideomycetes;Pleosporales;Pleosporales_unclassified;Pleosporales_unclassified	97	0.000277885	Ascomycota	U42482,KC841054,KC841028,EU189207,EU189206,CP022863,EU189210	0.993994,0.990991,0.990991,0.987988,0.987988,0.987988,0.987988	NCBI Hits Summary
OTU342	Eukaryota;Viridiplantae;Chlorophyta;	Eukaryota;Archaeplastida;Chloroplastida;Chlorophyta;	Eukaryota;Eukaryota_unclassified;Eukaryota_unclassified;Eukaryota_unclassified;Eukaryota_unclassified;Eukaryota_unclassified	97	0.00042179	Chlorophyta	LN870279,FN824371	0.932308,0.916923	NCBI Hits Summary
OTU114	Eukaryota;	Eukaryota;SAR;	Eukaryota;MAST-2;MAST-2_cl;MAST-2_or;MAST-2_fa;MAST-2_ge	95	0.000347357	MAST-2	JN090886	0.969697	NCBI Hits Summary
OTU127	Eukaryota;	Eukaryota;SAR;Alveolata;	Eukaryota;Dinoflagellata;Dinophyceae;Dinophyceae_unclassified;Dinophyceae_unclassified;Dinophyceae_unclassified	95	0.000456526	Dinoflagellata	EF058253,KJ758265,JF791060,KJ761221,KJ762196,KJ757402,KJ763337	0.969697,0.957576,0.954545,0.954545,0.954545,0.954545,0.954545	NCBI Hits Summary
OTU110	Eukaryota;	Eukaryota;SAR;Alveolata;Dinoflagellata;Dinophyceae;	Eukaryota;Dinoflagellata;Dinophyceae;Dinophyceae_unclassified;Dinophyceae_unclassified;Dinophyceae_unclassified	94	0.000545846	Dinoflagellata	EF058253,JXLM01000489	1,0.948485	NCBI Hits Summary												Woloszynskia pascheri
OTU81	Eukaryota;	Eukaryota;SAR;Stramenopiles;Ochrophyta;Pelagophyceae;	Eukaryota;Ochrophyta_ph;Pelagophyceae;Sarcinochrysidales;Sarcinochrysidales_fa;SS1-E01-69	93	0.000173678	Pelagophyceae	EU050972,EU247837,EU050971,KY980033	0.990881,0.975684,0.975684,0.975684	NCBI Hits Summary
OTU87	Eukaryota;Stramenopiles;	Eukaryota;SAR;Stramenopiles;Ochrophyta;Chrysophyceae;	Eukaryota;Ochrophyta_ph;Chrysophyceae;Chrysophyceae_unclassified;Chrysophyceae_unclassified;Chrysophyceae_unclassified	91	0.000352319	Chrysophyceae	EF165134,AF123297,AB520723	0.954268,0.954268,0.954268	NCBI Hits Summary
OTU164	Eukaryota;	Eukaryota;SAR;Alveolata;Ciliophora;Intramacronucleata;Spirotrichea;	Eukaryota;Ciliophora;Intramacronucleata;Spirotrichea;Choreotrichia;Choreotrichia_unclassified	91	0.000476375	Ciliophora	GU290112,JX461344,HQ219351	0.925234,0.915888,0.912773	NCBI Hits Summary
OTU74	Eukaryota;Alveolata;Ciliophora;Intramacronucleata;Oligohymenophorea;Hymenostomatida;Tetrahymenina;	Eukaryota;SAR;Alveolata;Ciliophora;Intramacronucleata;Conthreep;Oligohymenophorea;Hymenostomatia;	Eukaryota;Ciliophora;Intramacronucleata;Conthreep;Oligohymenophorea;Oligohymenophorea_unclassified	90	0.000233225	Ciliophora	HM014309,U36222	0.974359,0.961538	NCBI Hits Summary
OTU86	Eukaryota;	Eukaryota;SAR;Alveolata;Ciliophora;Intramacronucleata;Spirotrichea;Choreotrichia;	Eukaryota;Ciliophora;Intramacronucleata;Spirotrichea;Choreotrichia;Choreotrichia_unclassified	88	0.000208414	Ciliophora	GU067892	0.993769	NCBI Hits Summary
OTU111	Eukaryota;Fungi;Fungi incertae sedis;Chytridiomycota;environmental samples;	Eukaryota;Amorphea;Obazoa;Opisthokonta;Nucletmycea;Fungi;Chytridiomycota;Incertae Sedis;Chytridiomycetes;Rhizophydiales;	Eukaryota;Chytridiomycota;Chytridiomycetes;Rhizophydiales;Rhizophydiales_unclassified;Rhizophydiales_unclassified	88	0.000342394	Chytridiomycota	HQ191383,HQ191296,HQ191329	0.954819,0.939759,0.939759	NCBI Hits Summary
OTU282	Eukaryota;environmental samples;	Eukaryota;SAR;Alveolata;	Eukaryota;Dinoflagellata;Dinophyceae;Dinophyceae_unclassified;Dinophyceae_unclassified;Dinophyceae_unclassified	88	0.000406903	Dinoflagellata	KJ757982,KJ757867,KJ758255,KJ758050,JN090875,KJ760672,KJ763426,KJ762730	0.975758,0.975758,0.975758,0.975758,0.972727,0.972727,0.972727,0.972727	NCBI Hits Summary
OTU340	Eukaryota;	Eukaryota;SAR;Stramenopiles;Ochrophyta;Diatomea;Bacillariophytina;Bacillariophyceae;	Eukaryota;Diatomea;Diatomea_unclassified;Diatomea_unclassified;Diatomea_unclassified;Diatomea_unclassified	87	0.000228263	Bacillariophyceae	KT201576,KJ760614,KC771164,KC771171,KC771191,HM805036,DQ310201	0.972892,0.972892,0.96988,0.96988,0.96988,0.96988,0.966867	NCBI Hits Summary
OTU107	Eukaryota;Viridiplantae;Chlorophyta;Trebouxiophyceae;	Eukaryota;Archaeplastida;Chloroplastida;Chlorophyta;Trebouxiophyceae;	Eukaryota;Chlorophyta_ph;Chlorophyta_ph_unclassified;Chlorophyta_ph_unclassified;Chlorophyta_ph_unclassified;Chlorophyta_ph_unclassified	86	0.000392017	Chlorophyta/Trebouxiophyceae	GQ502289,AF516675,JF951858,MF070534,KX620913,FM205880,EU878373	0.948328,0.93921,0.93617,0.93617,0.93617,0.93617,0.93617	NCBI Hits Summary
OTU105	Eukaryota;Stramenopiles;Bacillariophyta;Fragilariophyceae;Fragilariophycidae;	Eukaryota;SAR;Stramenopiles;Ochrophyta;Diatomea;Coscinodiscophytina;Fragilariales;Fragilaria;	Eukaryota;Diatomea;Coscinodiscophytina_cl;Fragilariales;Fragilariales_fa;Tabularia	85	0.000372168	Bacillariophyceae	AJ535137,AM497738,EF465478,EF465469,AM497721,AM497722,EF465492	0.938838,0.938838,0.938838,0.938838,0.938838,0.938838,0.93578	NCBI Hits Summary
OTU109	Eukaryota;	Eukaryota;SAR;Alveolata;	Eukaryota;Dinoflagellata;Dinophyceae;Dinophyceae_unclassified;Dinophyceae_unclassified;Dinophyceae_unclassified	83	0.000272923	Dinoflagellata	KC771146,KJ758195,KJ762965,KR535601,KJ762730,KJ758116,KJ763731	0.963636,0.954545,0.951515,0.951515,0.951515,0.951515,0.951515	NCBI Hits Summary
OTU1169	Eukaryota;Viridiplantae;Chlorophyta;Chlorophyceae;Chlamydomonadales;	Eukaryota;Archaeplastida;Chloroplastida;Chlorophyta;Chlorophyceae;Chlamydomonadales;	Eukaryota;Chlorophyta_ph;Chlorophyta_ph_unclassified;Chlorophyta_ph_unclassified;Chlorophyta_ph_unclassified;Chlorophyta_ph_unclassified	82	0.000218338	Chlorophyta	FR865585,FR854385,KM020018,KM020017	0.960366,0.957317,0.957317,0.954268	NCBI Hits Summary
OTU103	Eukaryota;Stramenopiles;Bacillariophyta;Bacillariophyceae;Bacillariophycidae;	Eukaryota;SAR;Stramenopiles;Ochrophyta;Diatomea;Bacillariophytina;Bacillariophyceae;	Eukaryota;Diatomea;Bacillariophyceae;Bacillariophyceae_or;Bacillariophyceae_fa;Bacillariophyceae_fa_unclassified	80	0.000208414	Bacillariophyceae	AM501964,AM501961,GU067830,M87325,KJ961708,AM501953,EF151962	0.960123,0.957055,0.953988,0.953988,0.953988,0.953988,0.953988	NCBI Hits Summary
OTU717	Eukaryota;	Eukaryota;Archaeplastida;Chloroplastida;Chlorophyta;Chlorophyceae;	Eukaryota;Chlorophyta_ph;Chlorophyceae;Chlorophyceae_or;Chlorophyceae_fa;Chlorophyceae_ge	80	0.000218338	Chlorophyta	AY082979,GU117579	0.957317,0.954268	NCBI Hits Summary
OTU124	Eukaryota;Viridiplantae;Chlorophyta;Trebouxiophyceae;	Eukaryota;Archaeplastida;Chloroplastida;Chlorophyta;Trebouxiophyceae;	Eukaryota;Chlorophyta_ph;Trebouxiophyceae;Trebouxiophyceae_or;Trebouxiophyceae_fa;Trebouxiophyceae_ge	78	0.00037713	Chlorophyta/Trebouxiophyceae	FM205858,MH703760,FM205857,HQ111431,FM205851,KF144182,AY195964,AB080307	0.984802,0.984802,0.984802,0.984802,0.984802,0.984802,0.984802,0.984802	NCBI Hits Summary
OTU135	Eukaryota;environmental samples;	Eukaryota;Incertae Sedis;Telonema;	Eukaryota;Incertae_Sedis_ph;Incertae_Sedis_cl;Incertae_Sedis_or;Incertae_Sedis_fa;Telonema	75	0.000372168	SAR/Telonema	AJ564767,DQ103867,KC771198	0.954955,0.948949,0.942943	NCBI Hits Summary
OTU741	Unclassified;	Eukaryota;SAR;Alveolata;	Eukaryota;Dinoflagellata;Dinophyceae;Dinophyceae_unclassified;Dinophyceae_unclassified;Dinophyceae_unclassified	75	0.000362243	Dinoflagellata	FLLY01000077,KJ762846,KJ762691,KJ762321,KJ759266,KJ757950,HM581708	0.945122,0.942073,0.942073,0.942073,0.942073,0.942073,0.942073	NCBI Hits Summary
OTU121	Eukaryota;Rhizaria;Cercozoa;environmental samples;	Eukaryota;SAR;Rhizaria;Cercozoa;uncultured;	Eukaryota;Eukaryota_unclassified;Eukaryota_unclassified;Eukaryota_unclassified;Eukaryota_unclassified;Eukaryota_unclassified	73	0.000362243	Cercozoa			NCBI Hits Summary
OTU123	Eukaryota;environmental samples;	Eukaryota;SAR;Alveolata;	Eukaryota;Dinoflagellata;Dinophyceae;Dinophyceae_unclassified;Dinophyceae_unclassified;Dinophyceae_unclassified	73	0.000188565	Dinoflagellata	KJ763588,KJ758039,KJ758256,KJ758372,DQ103862,KJ757956	0.954545,0.954545,0.951515,0.948485,0.948485,0.948485	NCBI Hits Summary
OTU412	Eukaryota;	Eukaryota;SAR;Alveolata;Dinoflagellata;Dinophyceae;	Eukaryota;Dinoflagellata;Dinophyceae;Dinophyceae_unclassified;Dinophyceae_unclassified;Dinophyceae_unclassified	72	0.000203452	Dinoflagellata	GU295203,AB626150,KJ758152,KJ758106,KJ757777	0.960606,0.951515,0.948485,0.948485,0.948485	NCBI Hits Summary
OTU120	Eukaryota;Stramenopiles;Bacillariophyta;Coscinodiscophyceae;Coscinodiscophycidae;Aulacoseiraceae;Aulacoseira;	Eukaryota;SAR;Stramenopiles;Ochrophyta;Diatomea;Coscinodiscophytina;Melosirids;Aulacoseira;	Eukaryota;Diatomea;Coscinodiscophytina_cl;Coscinodiscophytina_or;Melosirids;Aulacoseira	71	0.000307659	Bacillariophyceae	AY121820	0.960606	NCBI Hits Summary
OTU145	Eukaryota;	Eukaryota;SAR;Stramenopiles;Ochrophyta;Dictyochophyceae;Pedinellales;	Eukaryota;Ochrophyta_ph;Dictyochophyceae;Pedinellales;Pedinellales_fa;Pedinellales_ge	69	0.000138943	Dictyochophyceae	JF730839,DQ310243	0.939394,0.939394	NCBI Hits Summary
OTU153	Unclassified;	Eukaryota;SAR;Rhizaria;Cercozoa;Thecofilosea;	Eukaryota;Cercozoa;Thecofilosea;Cryomonadida;Rhizaspididae;Rhogostoma	69	0.000188565	Cercozoa	EF024805,EF023834,HQ121430,DQ243997	0.981928,0.975904,0.975904,0.972892	NCBI Hits Summary
OTU122	Unclassified;	Unclassified;	Eukaryota;Ciliophora;Intramacronucleata;Conthreep;Phyllopharyngea;Tokophrya	67	0.00062028	Ciliophora			NCBI Hits Summary
OTU183	Eukaryota;Alveolata;Ciliophora;Intramacronucleata;Oligohymenophorea;Hymenostomatida;Tetrahymenina;	Eukaryota;SAR;Alveolata;Ciliophora;Intramacronucleata;Conthreep;Oligohymenophorea;Hymenostomatia;	Eukaryota;Ciliophora;Intramacronucleata;Conthreep;Oligohymenophorea;Tetrahymena	67	0.000173678	Ciliophora	HE820726,AY083000,M26358	0.980831,0.974441,0.974441	NCBI Hits Summary
OTU386	Unclassified;	Eukaryota;SAR;Alveolata;	Eukaryota;Ciliophora;Intramacronucleata;Conthreep;Conthreep_unclassified;Conthreep_unclassified	66	0.000327508	Ciliophora	AY829526,FPLK01002358	0.962848,0.950464	NCBI Hits Summary
OTU161	Eukaryota;environmental samples;	Eukaryota;Amorphea;Obazoa;Opisthokonta;	Eukaryota;Eukaryota_unclassified;Eukaryota_unclassified;Eukaryota_unclassified;Eukaryota_unclassified;Eukaryota_unclassified	64	0.000362243	Eukaryota_unclassified	KJ763063	0.928105	NCBI Hits Summary
OTU283	Eukaryota;environmental samples;	Eukaryota;SAR;Alveolata;	Eukaryota;Dinoflagellata;Dinophyceae;Dinophyceae_unclassified;Dinophyceae_unclassified;Dinophyceae_unclassified	64	0.000173678	Dinoflagellata	KJ758039,KJ757956,KJ763588,KJ758372,JX473666,JN090875,KJ757407	0.963746,0.957704,0.957704,0.957704,0.957704,0.957704,0.957704	NCBI Hits Summary
OTU463	Eukaryota;	Eukaryota;SAR;Alveolata;Dinoflagellata;Dinophyceae;	Eukaryota;Dinoflagellata;Dinophyceae;Dinophyceae_unclassified;Dinophyceae_unclassified;Dinophyceae_unclassified	63	0.000188565	Dinoflagellata	GU295203,KJ758334,KJ757777,KJ758106,KJ757816	0.954545,0.951515,0.948485,0.948485,0.948485	NCBI Hits Summary
OTU312	Eukaryota;Stramenopiles;	Eukaryota;SAR;Stramenopiles;Ochrophyta;Diatomea;Bacillariophytina;Mediophyceae;Thalassiosira;	Eukaryota;Diatomea;Mediophyceae;Mediophyceae_or;Mediophyceae_fa;Mediophyceae_fa_unclassified	62	0.00028781	Bacillariophyceae	AB831890,JQ781887,JQ782074,AM050629,LC189086,KT347147,AF374478,JX401228	0.966667,0.966667,0.966667,0.966667,0.963636,0.963636,0.963636,0.963636	NCBI Hits Summary
OTU128	Eukaryota;	Eukaryota;SAR;Stramenopiles;Ochrophyta;Diatomea;Bacillariophytina;Bacillariophyceae;	Eukaryota;Diatomea;Bacillariophyceae;Bacillariophyceae_or;Bacillariophyceae_fa;Bacillariophyceae_fa_unclassified	61	0.000158792	Bacillariophyceae	KF417673	0.98773	NCBI Hits Summary
OTU146	Eukaryota;	Eukaryota;SAR;Alveolata;Dinoflagellata;Dinophyceae;	Eukaryota;Dinoflagellata;Dinophyceae;Dinophyceae_unclassified;Dinophyceae_unclassified;Dinophyceae_unclassified	61	0.000267961	Dinoflagellata	DQ103862,FN557541,AY251288,AY121856	0.978788,0.975758,0.972727,0.972727	NCBI Hits Summary
OTU534	Eukaryota;Viridiplantae;Chlorophyta;Chlorophyceae;Chlamydomonadales;	Eukaryota;Archaeplastida;Chloroplastida;Chlorophyta;Chlorophyceae;Chlamydomonadales;	Eukaryota;Chlorophyta_ph;Chlorophyceae;Chlorophyceae_unclassified;Chlorophyceae_unclassified;Chlorophyceae_unclassified	61	0.000158792	Chlorophyta	KM020018,FR854385	0.960366,0.954268	NCBI Hits Summary
OTU134	Unclassified;	Unclassified;	Eukaryota;Diatomea;Diatomea_unclassified;Diatomea_unclassified;Diatomea_unclassified;Diatomea_unclassified	60	0.000258036	Bacillariophyceae			NCBI Hits Summary
OTU585	Eukaryota;Stramenopiles;Synurophyceae;Synurales;Mallomonadaceae;	Eukaryota;SAR;Stramenopiles;Ochrophyta;Chrysophyceae;Synurales;	Eukaryota;Ochrophyta_ph;Chrysophyceae;Synurales;Synurales_fa;Synura	60	0.000431715	Chrysophyceae	DQ487199,U73223,U73232,KY942077	0.97561,0.97561,0.969512,0.966463	NCBI Hits Summary
OTU131	Eukaryota;	Eukaryota;SAR;Rhizaria;Cercozoa;Thecofilosea;	Eukaryota;Cercozoa;Cercozoa_unclassified;Cercozoa_unclassified;Cercozoa_unclassified;Cercozoa_unclassified	59	0.000158792	Cercozoa	FJ824124	0.972892	NCBI Hits Summary
OTU132	Eukaryota;environmental samples;	Eukaryota;SAR;Alveolata;	Eukaryota;Dinoflagellata;Dinophyceae;Dinophyceae_unclassified;Dinophyceae_unclassified;Dinophyceae_unclassified	59	0.000282848	Dinoflagellata	KJ757950,KJ762691,GU819725,KJ759469,KJ757938,KJ763479,KJ757889	0.951923,0.951923,0.945513,0.945513,0.945513,0.945513,0.945513	NCBI Hits Summary
OTU148	Eukaryota;Stramenopiles;Bacillariophyta;Coscinodiscophyceae;Coscinodiscophycidae;Aulacoseiraceae;Aulacoseira;	Eukaryota;SAR;Stramenopiles;Ochrophyta;Diatomea;Coscinodiscophytina;Melosirids;Aulacoseira;	Eukaryota;Diatomea;Coscinodiscophytina_cl;Coscinodiscophytina_or;Melosirids;Aulacoseira	59	0.000401941	Bacillariophyceae	AY121820	0.969697	NCBI Hits Summary
OTU157	Eukaryota;Stramenopiles;Bacillariophyta;Bacillariophyceae;Bacillariophycidae;	Eukaryota;SAR;Stramenopiles;Ochrophyta;Diatomea;Bacillariophytina;Bacillariophyceae;	Eukaryota;Diatomea;Bacillariophyceae;Bacillariophyceae_or;Bacillariophyceae_fa;Bacillariophyceae_fa_unclassified	59	0.000267961	Bacillariophyceae	AM501964,AM501953,EF151980	0.969419,0.963303,0.963303	NCBI Hits Summary
OTU212	Eukaryota;environmental samples;	Eukaryota;SAR;Alveolata;	Eukaryota;Dinoflagellata;Dinophyceae;Gymnodiniphycidae;Gymnodinium_clade;Gymnodinium_clade_unclassified	59	0.000129018	Dinoflagellata	KJ758547,DQ103871,KJ758159,KJ757452,KJ759537,KJ757985,KJ759489,KJ758254	0.951662,0.951662,0.951662,0.94864,0.94864,0.94864,0.94864,0.94864	NCBI Hits Summary
OTU478	Eukaryota;	Eukaryota;SAR;Alveolata;Dinoflagellata;Dinophyceae;	Eukaryota;Dinoflagellata;Dinophyceae;Dinophyceae_unclassified;Dinophyceae_unclassified;Dinophyceae_unclassified	59	0.00042179	Dinoflagellata	KC771146,AY590483,AY251288	0.972644,0.969605,0.966565	NCBI Hits Summary
OTU83	unclassified sequences;metagenomes;	Eukaryota;Amorphea;Amoebozoa;SAR;Stramenopiles;Labyrinthulomycetes;Sorodiplophrys;	Eukaryota;Eukaryota_unclassified;Eukaryota_unclassified;Eukaryota_unclassified;Eukaryota_unclassified;Eukaryota_unclassified	58	0.000148867	Eukaryota_unclassified			NCBI Hits Summary
OTU133	Eukaryota;	Eukaryota;SAR;Alveolata;Ciliophora;Intramacronucleata;Litostomatea;Haptoria;	Eukaryota;Ciliophora;Intramacronucleata;Litostomatea;Haptoria;Haptoria_unclassified	58	0.000173678	Ciliophora	AB695505,LN869967,DQ777746	0.986755,0.97351,0.966887	NCBI Hits Summary
OTU101	Eukaryota;Alveolata;Ciliophora;	Eukaryota;SAR;Alveolata;Ciliophora;Intramacronucleata;Conthreep;Oligohymenophorea;Peritrichia;	Eukaryota;Ciliophora;Intramacronucleata;Conthreep;Oligohymenophorea;Peritrichia_ge	57	0.00024315	Ciliophora	AF401526,KF141789,GU187053	0.980519,0.980519,0.974026	NCBI Hits Summary
OTU115	Eukaryota;	Eukaryota;SAR;Stramenopiles;Ochrophyta;Diatomea;Bacillariophytina;Mediophyceae;Thalassiosira;	Eukaryota;Diatomea;Mediophyceae;Mediophyceae_or;Mediophyceae_fa;Stephanodiscus	57	0.000233225	Bacillariophyceae	JQ782059,KJ758081,KJ757896,KJ757932,JQ782078,KJ757925,KJ758228,KJ758126	0.963746,0.960725,0.960725,0.960725,0.960725,0.960725,0.960725,0.960725	NCBI Hits Summary
OTU136	Eukaryota;Stramenopiles;Bacillariophyta;Fragilariophyceae;Fragilariophycidae;	Eukaryota;SAR;Stramenopiles;Ochrophyta;Diatomea;Coscinodiscophytina;Fragilariales;Fragilaria;	Eukaryota;Diatomea;Coscinodiscophytina_cl;Fragilariales;Fragilariales_fa;Fragilariales_fa_unclassified	57	0.000267961	Bacillariophyceae	AM497722,AJ535137,EF465478,EF465469,AM497738,EF423405,AM497721	0.975535,0.975535,0.975535,0.975535,0.975535,0.972477,0.972477	NCBI Hits Summary
OTU143	Eukaryota;	Eukaryota;Haptophyta;Prymnesiophyceae;	Eukaryota;Prymnesiophyceae;Prymnesiophyceae_cl;Isochrysidales;Isochrysidales_fa;ESS2202	56	0.000282848	Haptophyta/Prymnesiophyceae	HQ446272	1	NCBI Hits Summary
OTU311	Eukaryota;Stramenopiles;Bacillariophyta;Fragilariophyceae;Fragilariophycidae;Fragilariales;Fragilariaceae;	Eukaryota;SAR;Stramenopiles;Ochrophyta;Diatomea;Coscinodiscophytina;Fragilariales;Fragilaria;	Eukaryota;Diatomea;Coscinodiscophytina_cl;Fragilariales;Fragilariales_fa;Fragilariales_fa_unclassified	56	0.000486299	Bacillariophyceae	AM497722,AJ535137,EF465478,AM497738,EF465469,EF465492,EF423405	0.975535,0.975535,0.975535,0.975535,0.975535,0.972477,0.972477	NCBI Hits Summary
OTU140	Eukaryota;	Eukaryota;SAR;Rhizaria;Cercozoa;Thecofilosea;	Eukaryota;Cercozoa;Thecofilosea;Cryomonadida;Rhizaspididae;Rhogostoma	55	0.000143905	Cercozoa	LC109101,AJ514867	0.993958,0.981873	NCBI Hits Summary
OTU371	Eukaryota;	Eukaryota;SAR;Alveolata;Dinoflagellata;Dinophyceae;	Eukaryota;Dinoflagellata;Dinophyceae;Dinophyceae_unclassified;Dinophyceae_unclassified;Dinophyceae_unclassified	55	0.000153829	Dinoflagellata	KJ758207,EU418970,KJ758051,KJ763426,LC054949,KJ760672,KR535601,KJ757295	0.969697,0.969697,0.969697,0.966667,0.966667,0.966667,0.966667,0.966667	NCBI Hits Summary
OTU177	Eukaryota;Stramenopiles;Bacillariophyta;	Eukaryota;SAR;Stramenopiles;Ochrophyta;Diatomea;	Eukaryota;Diatomea;Coscinodiscophytina_cl;Coscinodiscophytina_or;Melosirids;Aulacoseira	54	0.000436677	Bacillariophyceae	AY121820	0.966565	NCBI Hits Summary
OTU189	Eukaryota;	Eukaryota;SAR;Alveolata;	Eukaryota;Dinoflagellata;Dinophyceae;Dinophyceae_unclassified;Dinophyceae_unclassified;Dinophyceae_unclassified	54	0.000158792	Dinoflagellata	KC771146,KJ763731,KJ758116,KJ760672,KR535601,KJ763230,KJ763426	0.963636,0.951515,0.951515,0.951515,0.951515,0.951515,0.951515	NCBI Hits Summary
OTU138	Eukaryota;Fungi;Fungi incertae sedis;Chytridiomycota;environmental samples;	Eukaryota;Amorphea;Obazoa;Opisthokonta;Nucletmycea;Fungi;Chytridiomycota;Incertae Sedis;Chytridiomycetes;Rhizophydiales;	Eukaryota;Chytridiomycota;Chytridiomycetes;Rhizophydiales;Rhizophydiales_unclassified;Rhizophydiales_unclassified	53	0.000297734	Chytridiomycota	EU162640	0.993994	NCBI Hits Summary
OTU229	Eukaryota;	Eukaryota;SAR;Alveolata;	Eukaryota;Dinoflagellata;Dinophyceae;Dinophyceae_unclassified;Dinophyceae_unclassified;Dinophyceae_unclassified	53	0.000193527	Dinoflagellata	KC771146,KJ757796,KJ760672,KJ763731,KJ758116,KR535601,KJ763230	0.960606,0.951515,0.948485,0.948485,0.948485,0.948485,0.948485	NCBI Hits Summary
OTU302	Eukaryota;environmental samples;	Eukaryota;SAR;Alveolata;	Eukaryota;Dinoflagellata;Dinophyceae;Dinophyceae_unclassified;Dinophyceae_unclassified;Dinophyceae_unclassified	53	0.000203452	Dinoflagellata	JN090875,KJ758039,KJ757312,KJ758256,KJ762951,KJ757919	0.969697,0.966667,0.963636,0.963636,0.963636,0.963636	NCBI Hits Summary
OTU401	Eukaryota;environmental samples;	Eukaryota;Amorphea;Amoebozoa;SAR;Stramenopiles;Labyrinthulomycetes;Sorodiplophrys;	Eukaryota;Eukaryota_unclassified;Eukaryota_unclassified;Eukaryota_unclassified;Eukaryota_unclassified;Eukaryota_unclassified	52	0.000198489	Eukaryota_unclassified			NCBI Hits Summary
OTU423	Eukaryota;Stramenopiles;	Eukaryota;SAR;Stramenopiles;Ochrophyta;Chrysophyceae;	Eukaryota;Ochrophyta_ph;Chrysophyceae;Chrysophyceae_unclassified;Chrysophyceae_unclassified;Chrysophyceae_unclassified	52	0.00037713	Chrysophyceae	MG674910,MG674905,U73232,EF432525	0.957317,0.954268,0.954268,0.951219	NCBI Hits Summary
OTU141	Eukaryota;Viridiplantae;Chlorophyta;Chlorophyceae;	Eukaryota;Archaeplastida;Chloroplastida;Chlorophyta;Chlorophyceae;	Eukaryota;Chlorophyta_ph;Chlorophyceae;Chlorophyceae_or;Chlorophyceae_fa;Chlorophyceae_ge	51	0.000238187	Chlorophyta	AY220083,U83121,LC086369,LC086333	0.990798,0.990798,0.97546,0.969325	NCBI Hits Summary
OTU166	Eukaryota;	Eukaryota;SAR;Rhizaria;Cercozoa;Thecofilosea;uncultured;	Eukaryota;Cercozoa;Cercozoa_unclassified;Cercozoa_unclassified;Cercozoa_unclassified;Cercozoa_unclassified	51	0.000138943	Cercozoa	DQ314813,JN090868	0.951952,0.951952	NCBI Hits Summary
OTU239	Eukaryota;	Eukaryota;SAR;Alveolata;Dinoflagellata;Dinophyceae;	Eukaryota;Dinoflagellata;Dinophyceae;Dinophyceae_unclassified;Dinophyceae_unclassified;Dinophyceae_unclassified	51	0.000148867	Dinoflagellata	KC771146,LC054949,JF791103,KR535601,JF791101,KJ760672,KJ762965	0.963636,0.951515,0.951515,0.951515,0.951515,0.951515,0.951515	NCBI Hits Summary
OTU139	Unclassified;	Eukaryota;SAR;Stramenopiles;Ochrophyta;Chrysophyceae;	Eukaryota;Ochrophyta_ph;Chrysophyceae;Chrysophyceae_unclassified;Chrysophyceae_unclassified;Chrysophyceae_unclassified	50	0.000203452	Chrysophyceae	FPLK01000642,AB749145	0.996933,0.953988	NCBI Hits Summary
OTU149	Eukaryota;Ichthyosporea;Ichthyophonida;Creolimax;	Eukaryota;Amorphea;Obazoa;Opisthokonta;Holozoa;Choanozoa;Choanoflagellata;Ichthyosporea;Ichthyophonae;Pseudoperkinsidae;Creolimax;	Eukaryota;Holozoa_ph;Ichthyosporea;Pseudoperkinsidae;Pseudoperkinsidae_fa;Pseudoperkinsidae_ge	50	0.000282848	Holozoa			NCBI Hits Summary
OTU150	Eukaryota;	Eukaryota;SAR;Stramenopiles;Ochrophyta;Diatomea;Bacillariophytina;Bacillariophyceae;	Eukaryota;Diatomea;Bacillariophyceae;Bacillariophyceae_or;Bacillariophyceae_fa;Bacillariophyceae_fa_unclassified	49	0.000238187	Bacillariophyceae	EF432527,AJ867279,U18240,KC771164,KC771168,KC771174,KC771191,AJ535164	0.975684,0.975684,0.975684,0.972644,0.972644,0.972644,0.972644,0.972644	NCBI Hits Summary
OTU155	Eukaryota;environmental samples;	Eukaryota;SAR;Stramenopiles;Ochrophyta;Bolidomonas;	Eukaryota;Eukaryota_unclassified;Eukaryota_unclassified;Eukaryota_unclassified;Eukaryota_unclassified;Eukaryota_unclassified	48	0.000158792	Eukaryota_unclassified	KJ759752	0.915408	NCBI Hits Summary
OTU420	Eukaryota;Stramenopiles;Bacillariophyta;	Eukaryota;SAR;Stramenopiles;Ochrophyta;Diatomea;	Eukaryota;Diatomea;Diatomea_unclassified;Diatomea_unclassified;Diatomea_unclassified;Diatomea_unclassified	48	0.000292772	Bacillariophyceae	EF465476,EF423422	0.966463,0.966463	NCBI Hits Summary
OTU195	Eukaryota;Euglenozoa;Euglenida;Sphenomonadales;environmental samples;	Eukaryota;Discoba;Discicristata;Euglenozoa;Euglenida;Heteronematina;Petalomonas;	Eukaryota;Eukaryota_unclassified;Eukaryota_unclassified;Eukaryota_unclassified;Eukaryota_unclassified;Eukaryota_unclassified	47	0.000163754	Eukaryota_unclassified			NCBI Hits Summary
OTU152	Eukaryota;Stramenopiles;Bacillariophyta;Bacillariophyceae;Bacillariophycidae;Cymbellales;	Eukaryota;SAR;Stramenopiles;Ochrophyta;Diatomea;Bacillariophytina;Bacillariophyceae;	Eukaryota;Diatomea;Bacillariophyceae;Bacillariophyceae_or;Bacillariophyceae_fa;Bacillariophyceae_fa_unclassified	46	0.000238187	Bacillariophyceae	KT072999	1	NCBI Hits Summary
OTU176	Unclassified;	Unclassified;	Eukaryota;Eukaryota_unclassified;Eukaryota_unclassified;Eukaryota_unclassified;Eukaryota_unclassified;Eukaryota_unclassified	46	0.000208414	Eukaryota_unclassified			NCBI Hits Summary
OTU179	Eukaryota;	Eukaryota;SAR;Alveolata;Dinoflagellata;Dinophyceae;	Eukaryota;Dinoflagellata;Dinophyceae;Dinophyceae_unclassified;Dinophyceae_unclassified;Dinophyceae_unclassified	46	0.000213376	Dinoflagellata	KC771146,KJ758195,KJ762965,KR535601,KJ762730,KJ763731,KJ763230	0.960606,0.951515,0.948485,0.948485,0.948485,0.948485,0.948485	NCBI Hits Summary
OTU182	Eukaryota;	Eukaryota;Discoba;Discicristata;Euglenozoa;Euglenida;Heteronematina;Petalomonas;	Eukaryota;Eukaryota_unclassified;Eukaryota_unclassified;Eukaryota_unclassified;Eukaryota_unclassified;Eukaryota_unclassified	45	0.000163754	Eukaryota_unclassified	U84731,EF100248	0.967262,0.916667	NCBI Hits Summary
OTU159	Unclassified;	Eukaryota;SAR;Stramenopiles;Ochrophyta;Chrysophyceae;	Eukaryota;Ochrophyta_ph;Chrysophyceae;Chrysophyceae_unclassified;Chrysophyceae_unclassified;Chrysophyceae_unclassified	44	0.000183603	Chrysophyceae	AF123284,M87331,U71196,FR865768,EF023425,EF165130,HAFO01005448	0.966258,0.92638,0.92638,0.92638,0.923313,0.923313,0.923313	NCBI Hits Summary
OTU187	Eukaryota;Viridiplantae;Chlorophyta;	Eukaryota;Archaeplastida;Chloroplastida;Chlorophyta;Chlorophyceae;	Eukaryota;Chlorophyta_ph;Chlorophyta_ph_unclassified;Chlorophyta_ph_unclassified;Chlorophyta_ph_unclassified;Chlorophyta_ph_unclassified	44	7.44336e-05	Chlorophyta	HQ191405,AJ410453,HQ191368	0.981707,0.939024,0.935976	NCBI Hits Summary
OTU224	Eukaryota;	Eukaryota;SAR;Stramenopiles;Ochrophyta;Diatomea;Bacillariophytina;Mediophyceae;Thalassiosira;	Eukaryota;Diatomea;Mediophyceae;Mediophyceae_or;Mediophyceae_fa;Mediophyceae_fa_unclassified	44	0.000218338	Bacillariophyceae	JQ782059,KJ757932,KJ758081,KJ758126,JQ781887,LC189086,JQ782078,KJ757896	0.969788,0.966767,0.966767,0.966767,0.966767,0.966767,0.966767,0.966767	NCBI Hits Summary
OTU165	Eukaryota;Viridiplantae;Chlorophyta;Chlorophyceae;	Eukaryota;Archaeplastida;Chloroplastida;Chlorophyta;Chlorophyceae;	Eukaryota;Chlorophyta_ph;Chlorophyta_ph_unclassified;Chlorophyta_ph_unclassified;Chlorophyta_ph_unclassified;Chlorophyta_ph_unclassified	43	0.000233225	Chlorophyta	AF106074,HQ191374	0.990854,0.978659	NCBI Hits Summary
OTU180	Unclassified;	Unclassified;	Eukaryota;Eukaryota_unclassified;Eukaryota_unclassified;Eukaryota_unclassified;Eukaryota_unclassified;Eukaryota_unclassified	43	0.000302696	Eukaryota_unclassified			NCBI Hits Summary
OTU204	Eukaryota;	Eukaryota;SAR;Alveolata;Dinoflagellata;Dinophyceae;	Eukaryota;Dinoflagellata;Dinophyceae;Dinophyceae_unclassified;Dinophyceae_unclassified;Dinophyceae_unclassified	43	0.00024315	Dinoflagellata	AY590483,AY121856,DQ103862,FN557541,KJ757982	0.966667,0.963636,0.963636,0.960606,0.960606	NCBI Hits Summary
OTU387	Unclassified;	Eukaryota;SAR;Stramenopiles;Ochrophyta;Chrysophyceae;	Eukaryota;Ochrophyta_ph;Chrysophyceae;Chrysophyceae_unclassified;Chrysophyceae_unclassified;Chrysophyceae_unclassified	43	0.000267961	Chrysophyceae	AY651081,CEOE01007823	0.969512,0.963415	NCBI Hits Summary
OTU284	Eukaryota;environmental samples;	Eukaryota;SAR;Alveolata;	Eukaryota;Dinoflagellata;Dinoflagellata_unclassified;Dinoflagellata_unclassified;Dinoflagellata_unclassified;Dinoflagellata_unclassified	42	0.000143905	Dinoflagellata	KJ762571,KJ757926,KJ762196,JF791060,KJ757673,EU371138,KJ761221,HM581709	0.951515,0.951515,0.951515,0.948485,0.948485,0.948485,0.948485,0.948485	NCBI Hits Summary
OTU167	Eukaryota;Stramenopiles;	Eukaryota;SAR;Stramenopiles;Ochrophyta;Chrysophyceae;	Eukaryota;Ochrophyta_ph;Chrysophyceae;Chrysophyceae_unclassified;Chrysophyceae_unclassified;Chrysophyceae_unclassified	41	0.000238187	Chrysophyceae	AF123293,HAFT01000499,U73232,MG674913	0.942073,0.939024,0.935976,0.935976	NCBI Hits Summary
OTU265	Eukaryota;	Eukaryota;SAR;Alveolata;Dinoflagellata;Dinophyceae;	Eukaryota;Dinoflagellata;Dinophyceae;Peridiniphycidae_or;Thoracosphaeraceae;Scrippsiella	41	0.000143905	Dinoflagellata	KC771146,LC054949,KJ758066,FN557541	0.939394,0.933333,0.930303,0.930303	NCBI Hits Summary
OTU358	Eukaryota;	Eukaryota;SAR;Alveolata;	Eukaryota;Dinoflagellata;Dinophyceae;Dinophyceae_unclassified;Dinophyceae_unclassified;Dinophyceae_unclassified	41	0.000138943	Dinoflagellata	KC771146,KJ758066,KJ760672,KJ763731,KJ758116,KJ763426,KJ763230	0.939394,0.930303,0.927273,0.927273,0.927273,0.927273,0.927273	NCBI Hits Summary
OTU1014	Eukaryota;Alveolata;	Eukaryota;SAR;Alveolata;Ciliophora;Intramacronucleata;Spirotrichea;Choreotrichia;Tintinnidium;	Eukaryota;Ciliophora;Intramacronucleata;Spirotrichea;Choreotrichia;Tintinnidium	40	0.000208414	Ciliophora	EU162620	0.93125	NCBI Hits Summary
OTU170	Eukaryota;Alveolata;	Eukaryota;SAR;Alveolata;	Eukaryota;Protalveolata;Colpodellida;Colpodellida_or;Colpodellida_fa;Colpodellida_ge	39	0.000193527	Colpodellida	GDKH01029260	0.944615	NCBI Hits Summary
OTU174	Eukaryota;	Eukaryota;SAR;Stramenopiles;Ochrophyta;Chrysophyceae;	Eukaryota;Ochrophyta_ph;Chrysophyceae;Chrysophyceae_unclassified;Chrysophyceae_unclassified;Chrysophyceae_unclassified	39	0.000148867	Chrysophyceae	EF527128,FR865768	0.972561,0.951219	NCBI Hits Summary
OTU125	Unclassified;	Eukaryota;	Eukaryota;Ciliophora;Intramacronucleata;Conthreep;Oligohymenophorea;Telotrochidium	38	9.92447e-05	Ciliophora	FPLP01011743,KU869709	1,0.993506	NCBI Hits Summary
OTU160	Unclassified;	Unclassified;	Eukaryota;Eukaryota_unclassified;Eukaryota_unclassified;Eukaryota_unclassified;Eukaryota_unclassified;Eukaryota_unclassified	38	0.000208414	Eukaryota_unclassified			NCBI Hits Summary
OTU281	Unclassified;	Eukaryota;SAR;Alveolata;Ciliophora;Intramacronucleata;Spirotrichea;Oligotrichia;	Eukaryota;Ciliophora;Intramacronucleata;Spirotrichea;Oligotrichia;Oligotrichia_unclassified	38	5.95468e-05	Ciliophora	FPLK01000763,FPLK01002665,FPLK01003043	0.975155,0.975155,0.975155	NCBI Hits Summary
OTU297	Eukaryota;	Eukaryota;SAR;Alveolata;Dinoflagellata;Dinophyceae;	Eukaryota;Dinoflagellata;Dinophyceae;Dinophyceae_unclassified;Dinophyceae_unclassified;Dinophyceae_unclassified	38	0.000104207	Dinoflagellata	KJ758334,KR535601,KJ758152,KJ757777,KJ758106,KJ757816,KC771146	0.966667,0.963636,0.963636,0.963636,0.963636,0.963636,0.963636	NCBI Hits Summary
OTU178	Unclassified;	Unclassified;	Eukaryota;Eukaryota_unclassified;Eukaryota_unclassified;Eukaryota_unclassified;Eukaryota_unclassified;Eukaryota_unclassified	37	0.000198489	Eukaryota_unclassified			NCBI Hits Summary
OTU184	Eukaryota;Cryptophyta;	Eukaryota;Cryptophyceae;Cryptomonadales;	Eukaryota;Eukaryota_unclassified;Eukaryota_unclassified;Eukaryota_unclassified;Eukaryota_unclassified;Eukaryota_unclassified	37	9.42825e-05	Cryptophyceae	AM901023	0.933333	NCBI Hits Summary
OTU185	Unclassified;	Unclassified;	Eukaryota;Eukaryota_unclassified;Eukaryota_unclassified;Eukaryota_unclassified;Eukaryota_unclassified;Eukaryota_unclassified	37	0.000178641	Eukaryota_unclassified			NCBI Hits Summary
OTU192	Unclassified;	Eukaryota;Amorphea;Obazoa;Opisthokonta;Holozoa;Choanozoa;Choanoflagellata;Choanoflagellida;Craspedida;Codonosigidae;	Eukaryota;Eukaryota_unclassified;Eukaryota_unclassified;Eukaryota_unclassified;Eukaryota_unclassified;Eukaryota_unclassified	36	5.45846e-05	Holozoa	Z34900	0.994048	NCBI Hits Summary
OTU288	Eukaryota;	Eukaryota;SAR;Alveolata;	Eukaryota;Dinoflagellata;Dinophyceae;Dinophyceae_unclassified;Dinophyceae_unclassified;Dinophyceae_unclassified	36	0.000129018	Dinoflagellata	KC771146,FN557541,AY590483	0.969697,0.960606,0.960606	NCBI Hits Summary
OTU171	Eukaryota;Alveolata;Ciliophora;Intramacronucleata;Litostomatea;Haptoria;Pleurostomatida;	Eukaryota;SAR;Alveolata;Ciliophora;Intramacronucleata;Litostomatea;Haptoria;	Eukaryota;Ciliophora;Intramacronucleata;Litostomatea;Haptoria;Haptoria_unclassified	35	9.42825e-05	Ciliophora	AY102175,EF123708,FJ870086,KM025129,FJ875149,GU574810,EU242510	0.990033,0.976744,0.976744,0.976744,0.973422,0.973422,0.973422	NCBI Hits Summary
OTU370	Eukaryota;	Eukaryota;SAR;Stramenopiles;Ochrophyta;Diatomea;Bacillariophytina;Bacillariophyceae;	Eukaryota;Diatomea;Bacillariophyceae;Bacillariophyceae_or;Bacillariophyceae_fa;Bacillariophyceae_fa_unclassified	35	0.000109169	Bacillariophyceae	MH017662,KJ961671,KC771157,KC771197,KC771181,KC771184,KC771182	0.978593,0.978593,0.975535,0.975535,0.975535,0.975535,0.972477	NCBI Hits Summary
OTU186	Unclassified;	Unclassified;	Eukaryota;Eukaryota_unclassified;Eukaryota_unclassified;Eukaryota_unclassified;Eukaryota_unclassified;Eukaryota_unclassified	34	0.000168716	Eukaryota_unclassified			NCBI Hits Summary
OTU191	Eukaryota;environmental samples;	Eukaryota;Cryptophyceae;	Eukaryota;Eukaryota_unclassified;Eukaryota_unclassified;Eukaryota_unclassified;Eukaryota_unclassified;Eukaryota_unclassified	34	9.42825e-05	Cryptophyceae	GU290075,AY642716,GU067784	0.965944,0.965944,0.944272	NCBI Hits Summary
OTU222	Eukaryota;environmental samples;	Eukaryota;SAR;Alveolata;Dinoflagellata;	Eukaryota;Dinoflagellata;Dinophyceae;Dinophyceae_unclassified;Dinophyceae_unclassified;Dinophyceae_unclassified	34	9.42825e-05	Dinoflagellata	KJ762844,KJ758318,KJ758217,KJ758039,KJ758345,KJ757751,KJ763588	0.978788,0.978788,0.978788,0.975758,0.975758,0.975758,0.975758	NCBI Hits Summary
OTU245	Eukaryota;	Eukaryota;SAR;Alveolata;Ciliophora;Intramacronucleata;Conthreep;Phyllopharyngea;Suctoria;Tokophrya;	Eukaryota;Ciliophora;Intramacronucleata;Conthreep;Phyllopharyngea;Tokophrya	34	8.93203e-05	Ciliophora	AY332720	0.942492	NCBI Hits Summary
OTU298	Eukaryota;	Eukaryota;SAR;Alveolata;Dinoflagellata;Dinophyceae;	Eukaryota;Dinoflagellata;Dinophyceae;Dinophyceae_unclassified;Dinophyceae_unclassified;Dinophyceae_unclassified	34	0.00013398	Dinoflagellata	KC771146,LC054949,KJ762965,KJ763731,JF791103,KJ760672,KR535601	0.960606,0.948485,0.948485,0.948485,0.948485,0.948485,0.948485	NCBI Hits Summary
OTU333	Eukaryota;	Eukaryota;SAR;Alveolata;Ciliophora;Intramacronucleata;Conthreep;Oligohymenophorea;Peritrichia;	Eukaryota;Ciliophora;Intramacronucleata;Conthreep;Oligohymenophorea;Telotrochidium	34	8.93203e-05	Ciliophora	AB902204,KY355505,AB901917,KU869709,JX178765,AB902003	0.996753,0.980519,0.980519,0.974026,0.974026,0.974026	NCBI Hits Summary
OTU582	Eukaryota;	Eukaryota;SAR;Stramenopiles;Ochrophyta;Diatomea;Bacillariophytina;Bacillariophyceae;	Eukaryota;Diatomea;Diatomea_unclassified;Diatomea_unclassified;Diatomea_unclassified;Diatomea_unclassified	34	8.93203e-05	Bacillariophyceae	KC771155,KC771171,KC771164,KC771177,KC771191,HM805036,KC771176	0.966867,0.963855,0.963855,0.963855,0.963855,0.963855,0.960843	NCBI Hits Summary
OTU190	Eukaryota;	Eukaryota;Amorphea;Obazoa;Opisthokonta;Nucletmycea;Fungi;Dikarya;Ascomycota;Pezizomycotina;Dothideomycetes;Capnodiales;Cladosporiaceae;Cladosporium;	Eukaryota;Ascomycota;Dothideomycetes;Capnodiales;Cladosporiaceae;Cladosporium	33	0.000124056	Ascomycota	EU167592,EU167558,BBPC01010250,EU167591,GEUG01002629,EU343074,EU343087	1,1,1,1,1,0.990991,0.990991	NCBI Hits Summary
OTU194	Eukaryota;Fungi;Fungi incertae sedis;Chytridiomycota;	Eukaryota;Amorphea;Obazoa;Opisthokonta;Nucletmycea;Fungi;Chytridiomycota;Incertae Sedis;Chytridiomycetes;Rhizophydiales;	Eukaryota;Chytridiomycota;Chytridiomycetes;Rhizophydiales;Rhizophydiales_unclassified;Rhizophydiales_unclassified	33	9.92447e-05	Chytridiomycota	GQ995436,EU162640,FPLS01000762	0.96997,0.960961,0.957958	NCBI Hits Summary
OTU359	Unclassified;	Eukaryota;SAR;Stramenopiles;Ochrophyta;Chrysophyceae;	Eukaryota;Ochrophyta_ph;Chrysophyceae;Chrysophyceae_unclassified;Chrysophyceae_unclassified;Chrysophyceae_unclassified	33	0.000233225	Chrysophyceae	AB749076,GU290105	0.966463,0.951219	NCBI Hits Summary
OTU465	Eukaryota;environmental samples;	Eukaryota;SAR;Alveolata;Dinoflagellata;	Eukaryota;Dinoflagellata;Dinophyceae;Dinophyceae_unclassified;Dinophyceae_unclassified;Dinophyceae_unclassified	33	0.000104207	Dinoflagellata	KJ763588,KJ758039,KJ758256,KJ758372,KJ758318,KJ762844,KJ758217	0.963636,0.963636,0.960606,0.960606,0.960606,0.960606,0.960606	NCBI Hits Summary
OTU200	Unclassified;	Unclassified;	Eukaryota;Eukaryota_unclassified;Eukaryota_unclassified;Eukaryota_unclassified;Eukaryota_unclassified;Eukaryota_unclassified	32	8.4358e-05	Eukaryota_unclassified			NCBI Hits Summary
OTU202	Eukaryota;Stramenopiles;Bacillariophyta;Fragilariophyceae;Fragilariophycidae;Fragilariales;	Eukaryota;SAR;Stramenopiles;Ochrophyta;Diatomea;Coscinodiscophytina;Fragilariales;Staurosira;	Eukaryota;Diatomea;Coscinodiscophytina_cl;Fragilariales;Fragilariales_fa;Staurosira	32	0.000183603	Bacillariophyceae	EF465481,EF465480,EF491890	0.990854,0.990854,0.984756	NCBI Hits Summary
OTU198	Eukaryota;	Eukaryota;Amorphea;Obazoa;Opisthokonta;Nucletmycea;Fungi;Cryptomycota;LKM11;	Eukaryota;Cryptomycota;LKM11_cl;LKM11_or;LKM11_fa;LKM11_ge	31	7.93958e-05	Cryptomycota	FJ687268	0.990937	NCBI Hits Summary
OTU206	Eukaryota;environmental samples;	Eukaryota;SAR;Alveolata;	Eukaryota;Dinoflagellata;Dinophyceae;Gymnodiniphycidae;Gymnodinium_clade;Gymnodinium_clade_ge	31	7.44336e-05	Dinoflagellata	KJ758547,JF730844,KJ757874,AY256288,KJ758214,KJ757452,KJ757985	0.940397,0.940397,0.937086,0.937086,0.933775,0.933775,0.933775	NCBI Hits Summary
OTU207	Unclassified;	Eukaryota;Amorphea;Obazoa;Opisthokonta;Nucletmycea;Fungi;LKM15;	Eukaryota;LKM15;LKM15_cl;LKM15_or;LKM15_fa;LKM15_ge	31	7.93958e-05	LKM15	FPLS01050367,AB901587	0.966361,0.966361	NCBI Hits Summary
OTU209	Unclassified;	Eukaryota;SAR;Stramenopiles;Ochrophyta;Chrysophyceae;	Eukaryota;Ochrophyta_ph;Chrysophyceae;Chrysophyceae_unclassified;Chrysophyceae_unclassified;Chrysophyceae_unclassified	31	0.000163754	Chrysophyceae	MG674911,GU290107,AF123296,AF123298,AF123301,FPLK01000769,U73230	0.935976,0.932927,0.932927,0.932927,0.929878,0.929878,0.929878	NCBI Hits Summary
OTU249	Eukaryota;	Eukaryota;SAR;Alveolata;Ciliophora;Intramacronucleata;Spirotrichea;	Eukaryota;Ciliophora;Intramacronucleata;Spirotrichea;Spirotrichea_unclassified;Spirotrichea_unclassified	31	0.000188565	Ciliophora	JX461344,FJ870072	0.937695,0.934579	NCBI Hits Summary
OTU252	Eukaryota;Viridiplantae;Chlorophyta;Ulvophyceae;	Eukaryota;Archaeplastida;Chloroplastida;Chlorophyta;Ulvophyceae;	Eukaryota;Chlorophyta_ph;Ulvophyceae;Ulvophyceae_or;Ulvophyceae_fa;Ulvophyceae_ge	31	0.000129018	Chlorophyta	Z47996,MF034602,FR865654,MF034601,MF034647	0.960123,0.960123,0.960123,0.944785,0.944785	NCBI Hits Summary
OTU1263	Eukaryota;Stramenopiles;Bacillariophyta;Coscinodiscophyceae;	Eukaryota;SAR;Stramenopiles;Ochrophyta;Diatomea;	Eukaryota;Diatomea;Coscinodiscophytina_cl;Coscinodiscophytina_or;Melosirids;Aulacoseira	31	0.000188565	Bacillariophyceae	AY121820	0.954545	NCBI Hits Summary
OTU210	Eukaryota;	Eukaryota;SAR;Stramenopiles;Ochrophyta;Chrysophyceae;Ochromonadales;Paraphysomonas;	Eukaryota;Ochrophyta_ph;Chrysophyceae;Ochromonadales;Ochromonadales_fa;Paraphysomonas	29	0.000124056	Chrysophyceae	EF432519,EF100355,GU822973,GU823603,GU823291	0.984756,0.978659,0.978659,0.978659,0.97561	NCBI Hits Summary
OTU219	Eukaryota;Viridiplantae;Chlorophyta;Ulvophyceae;	Eukaryota;Archaeplastida;Chloroplastida;Chlorophyta;Ulvophyceae;	Eukaryota;Eukaryota_unclassified;Eukaryota_unclassified;Eukaryota_unclassified;Eukaryota_unclassified;Eukaryota_unclassified	29	0.000124056	Chlorophyta	MF034602,Z47996,FR865654,Z28970,MF034601	0.947853,0.947853,0.947853,0.932515,0.932515	NCBI Hits Summary
OTU350	Eukaryota;	Eukaryota;Haptophyta;Prymnesiophyceae;	Eukaryota;Prymnesiophyceae;Prymnesiophyceae_cl;Isochrysidales;Isochrysidales_fa;ESS2202	29	0.000143905	Haptophyta/Prymnesiophyceae	HQ446272	0.967164	NCBI Hits Summary
OTU410	Eukaryota;	Eukaryota;SAR;Alveolata;Ciliophora;Intramacronucleata;Spirotrichea;Choreotrichia;	Eukaryota;Ciliophora;Intramacronucleata;Spirotrichea;Spirotrichea_unclassified;Spirotrichea_unclassified	29	0.000173678	Ciliophora	GU290112	0.915888	NCBI Hits Summary
OTU495	Eukaryota;environmental samples;	Eukaryota;SAR;Alveolata;	Eukaryota;Dinoflagellata;Dinophyceae;Gymnodiniphycidae;Gymnodinium_clade;Gymnodinium_clade_unclassified	28	4.46601e-05	Dinoflagellata	KJ757957,KJ759505,KJ763663,KJ757977,KJ758136,KJ758132,KJ757878,KJ757779,KJ758139	0.960366,0.960366,0.960366,0.960366,0.960366,0.960366,0.960366,0.960366,0.960366	NCBI Hits Summary
OTU610	Eukaryota;	Eukaryota;Archaeplastida;Chloroplastida;Chlorophyta;Chlorophyceae;	Eukaryota;Chlorophyta_ph;Chlorophyta_ph_unclassified;Chlorophyta_ph_unclassified;Chlorophyta_ph_unclassified;Chlorophyta_ph_unclassified	28	4.46601e-05	Chlorophyta	HQ191368	0.957187	NCBI Hits Summary
OTU653	Eukaryota;environmental samples;	Eukaryota;SAR;Alveolata;	Eukaryota;Eukaryota_unclassified;Eukaryota_unclassified;Eukaryota_unclassified;Eukaryota_unclassified;Eukaryota_unclassified	28	0.000143905	Eukaryota_unclassified	KJ762846,KJ757938,KJ758000,KJ763479,KJ759469,HM581708,KJ758150	0.957187,0.954128,0.954128,0.954128,0.954128,0.95107,0.95107	NCBI Hits Summary
OTU215	Unclassified;	Unclassified;	Eukaryota;Eukaryota_unclassified;Eukaryota_unclassified;Eukaryota_unclassified;Eukaryota_unclassified;Eukaryota_unclassified	27	0.000114131	Eukaryota_unclassified			NCBI Hits Summary
OTU218	Eukaryota;	Eukaryota;SAR;Stramenopiles;Ochrophyta;Diatomea;Bacillariophytina;Bacillariophyceae;	Eukaryota;Diatomea;Bacillariophyceae;Bacillariophyceae_or;Bacillariophyceae_fa;Navicula	27	0.000109169	Bacillariophyceae	KJ961668,EU050967,AY179995	0.99696,0.99696,0.993921	NCBI Hits Summary
OTU221	Eukaryota;	Eukaryota;SAR;Stramenopiles;Ochrophyta;Dictyochophyceae;Pedinellales;	Eukaryota;Ochrophyta_ph;Dictyochophyceae;Pedinellales;Pedinellales_fa;Pedinellales_fa_unclassified	27	4.96224e-05	Dictyochophyceae	DQ647512,AB081517,KP404878,EF527119	0.954268,0.951219,0.951219,0.945122	NCBI Hits Summary
OTU382	Eukaryota;Stramenopiles;Bacillariophyta;Fragilariophyceae;Fragilariophycidae;	Eukaryota;SAR;Stramenopiles;Ochrophyta;Diatomea;Coscinodiscophytina;Fragilariales;	Eukaryota;Diatomea;Coscinodiscophytina_cl;Fragilariales;Fragilariales_fa;Ulnaria	27	0.00028781	Bacillariophyceae	EF423422,EF465476	0.963303,0.963303	NCBI Hits Summary
OTU398	Unclassified;	Eukaryota;SAR;Stramenopiles;Ochrophyta;Chrysophyceae;	Eukaryota;Ochrophyta_ph;Chrysophyceae;Chrysophyceae_unclassified;Chrysophyceae_unclassified;Chrysophyceae_unclassified	27	0.000148867	Chrysophyceae	EF165134	0.954268	NCBI Hits Summary
OTU1095	Eukaryota;	Eukaryota;SAR;Alveolata;Dinoflagellata;Dinophyceae;Gymnodiniphycidae;	Eukaryota;Dinoflagellata;Dinophyceae;Gymnodiniphycidae;Gymnodinium_clade;Gymnodinium_clade_unclassified	27	5.95468e-05	Dinoflagellata	GU295203	0.963636	NCBI Hits Summary
OTU217	Unclassified;	Eukaryota;Amorphea;Obazoa;Opisthokonta;Nucletmycea;Fungi;Dikarya;Ascomycota;Pezizomycotina;	Eukaryota;Ascomycota;Leotiomycetes;Helotiales;Incertae_Sedis;Tetracladium	26	6.94713e-05	Ascomycota	MF565517	0.996979	NCBI Hits Summary
OTU236	Unclassified;	Unclassified;	Eukaryota;Eukaryota_unclassified;Eukaryota_unclassified;Eukaryota_unclassified;Eukaryota_unclassified;Eukaryota_unclassified	26	6.94713e-05	Eukaryota_unclassified			NCBI Hits Summary
OTU250	Unclassified;	Eukaryota;SAR;Stramenopiles;Ochrophyta;Chrysophyceae;	Eukaryota;Ochrophyta_ph;Chrysophyceae;Chrysocapsales;Chrysocapsales_fa;Chrysocapsales_fa_unclassified	26	0.000124056	Chrysophyceae	EF165130	0.957055	NCBI Hits Summary
OTU460	Unclassified;	Eukaryota;SAR;Stramenopiles;Ochrophyta;Chrysophyceae;	Eukaryota;Ochrophyta_ph;Chrysophyceae;Chrysophyceae_unclassified;Chrysophyceae_unclassified;Chrysophyceae_unclassified	26	0.000138943	Chrysophyceae	AJ236860,AB585964,FPLS01038393,HAFT01000499	0.960366,0.960366,0.957317,0.957317	NCBI Hits Summary
OTU854	Eukaryota;Stramenopiles;	Eukaryota;SAR;Stramenopiles;Ochrophyta;Chrysophyceae;	Eukaryota;Ochrophyta_ph;Chrysophyceae;Chrysophyceae_or;Chrysophyceae_fa;Chrysophyceae_ge	26	6.94713e-05	Chrysophyceae	MG674912	0.972561	NCBI Hits Summary
OTU162	Eukaryota;	Eukaryota;SAR;Alveolata;Ciliophora;Intramacronucleata;Conthreep;Phyllopharyngea;Suctoria;Tokophrya;	Eukaryota;Ciliophora;Intramacronucleata;Conthreep;Phyllopharyngea;Tokophrya	25	0.00013398	Ciliophora	AB901784,AY102174,AY332720,FPLP01007549	0.914013,0.914013,0.907643,0.904459	NCBI Hits Summary
OTU163	Unclassified;	Eukaryota;SAR;Alveolata;Ciliophora;Intramacronucleata;Litostomatea;Haptoria;	Eukaryota;Ciliophora;Intramacronucleata;Litostomatea;Haptoria;Arcuospathidium	25	6.94713e-05	Ciliophora	JF263452	1	NCBI Hits Summary
OTU197	Eukaryota;	Eukaryota;Haptophyta;Prymnesiophyceae;	Eukaryota;Prymnesiophyceae;Prymnesiophyceae_cl;Isochrysidales;Isochrysidales_fa;ESS2202	25	0.000138943	Haptophyta/Prymnesiophyceae	HQ446272	0.952522	NCBI Hits Summary
OTU225	Eukaryota;Viridiplantae;Streptophyta;Embryophyta;Tracheophyta;Spermatophyta;Magnoliophyta;eudicotyledons;Gunneridae;Pentapetalae;	Eukaryota;Archaeplastida;Chloroplastida;Charophyta;Phragmoplastophyta;Streptophyta;Embryophyta;Tracheophyta;Spermatophyta;Magnoliophyta;	Eukaryota;Phragmoplastophyta;Embryophyta;Magnoliophyta_or;Magnoliophyta_fa;Magnoliophyta_ge	25	0.000114131	Embryophyta	LRBV01004932,LRBV01001970,GEIC01058140,AONS01016433,AF419810,MF171079,GCVR01033941,DQ790103	1,1,1,1,1,1,0.997006,0.997006	NCBI Hits Summary
OTU226	Unclassified;	Eukaryota;SAR;Stramenopiles;Ochrophyta;Chrysophyceae;	Eukaryota;Ochrophyta_ph;Chrysophyceae;Chrysophyceae_unclassified;Chrysophyceae_unclassified;Chrysophyceae_unclassified	25	4.46601e-05	Chrysophyceae	KJ763237,FPLS01038393,FPLK01000769	0.941538,0.932308,0.926154	NCBI Hits Summary
OTU240	Eukaryota;Stramenopiles;Bacillariophyta;Coscinodiscophyceae;Coscinodiscophycidae;Aulacoseiraceae;Aulacoseira;	Eukaryota;SAR;Stramenopiles;Ochrophyta;Diatomea;Coscinodiscophytina;Melosirids;Aulacoseira;	Eukaryota;Diatomea;Coscinodiscophytina_cl;Coscinodiscophytina_or;Melosirids;Aulacoseira	25	0.000153829	Bacillariophyceae	AY121820	0.957576	NCBI Hits Summary
OTU242	Eukaryota;	Eukaryota;SAR;Alveolata;	Eukaryota;Dinoflagellata;Dinophyceae;Dinophyceae_unclassified;Dinophyceae_unclassified;Dinophyceae_unclassified	25	5.95468e-05	Dinoflagellata	KC771146,FN557541,KJ762730,KJ762965,KR535601,KJ758116,KJ763731	0.954545,0.945455,0.942424,0.942424,0.942424,0.942424,0.942424	NCBI Hits Summary
OTU246	Eukaryota;	Eukaryota;SAR;Stramenopiles;Ochrophyta;Chrysophyceae;	Eukaryota;Ochrophyta_ph;Chrysophyceae;Chrysophyceae_unclassified;Chrysophyceae_unclassified;Chrysophyceae_unclassified	25	0.000143905	Chrysophyceae	M87331,AF123283	0.966258,0.947853	NCBI Hits Summary
OTU255	Eukaryota;environmental samples;	Eukaryota;SAR;Alveolata;	Eukaryota;Dinoflagellata;Dinophyceae;Gymnodiniphycidae;Gymnodinium_clade;Gymnodinium_clade_ge	25	4.96224e-05	Dinoflagellata	DQ103871,KJ758547,EF526865,KJ757985,KJ758254,KJ758214,KJ759537,KJ757452	0.945455,0.945455,0.945455,0.942424,0.942424,0.942424,0.942424,0.942424	NCBI Hits Summary
OTU273	Eukaryota;Stramenopiles;Bacillariophyta;Fragilariophyceae;Fragilariophycidae;	Eukaryota;SAR;Stramenopiles;Ochrophyta;Diatomea;Coscinodiscophytina;Fragilariales;Fragilaria;	Eukaryota;Diatomea;Coscinodiscophytina_cl;Fragilariales;Fragilariales_fa;Fragilariales_fa_unclassified	25	0.000109169	Bacillariophyceae	AM497722,AJ535137,EF465469,EF465478,AM497738,EF423405,AM497721	0.975535,0.975535,0.975535,0.975535,0.975535,0.972477,0.972477	NCBI Hits Summary
OTU445	Eukaryota;Alveolata;Ciliophora;	Eukaryota;SAR;Alveolata;Ciliophora;Intramacronucleata;Litostomatea;Haptoria;	Eukaryota;Ciliophora;Intramacronucleata;Litostomatea;Haptoria;Dileptus	25	0.000129018	Ciliophora	GU068007,HM581677,DQ487195	1,0.993355,0.993355	NCBI Hits Summary
OTU677	Eukaryota;	Eukaryota;SAR;Stramenopiles;Ochrophyta;Diatomea;	Eukaryota;Diatomea;Diatomea_unclassified;Diatomea_unclassified;Diatomea_unclassified;Diatomea_unclassified	25	0.000213376	Bacillariophyceae	EF423422,EF465476,EF151980,AM502037	0.954407,0.954407,0.945289,0.945289	NCBI Hits Summary
OTU205	Eukaryota;Stramenopiles;Oomycetes;	Eukaryota;SAR;Stramenopiles;Peronosporomycetes;	Eukaryota;Peronosporomycetes;Peronosporomycetes_cl;Peronosporomycetes_or;Peronosporomycetes_fa;Peronosporomycetes_ge	24	5.95468e-05	Peronosporomycetes	AJ238662,AJ238658,AJ238661	0.993994,0.993994,0.975976	NCBI Hits Summary
OTU227	Eukaryota;environmental samples;	Eukaryota;SAR;Alveolata;Dinoflagellata;	Eukaryota;Dinoflagellata;Dinophyceae;Dinophyceae_unclassified;Dinophyceae_unclassified;Dinophyceae_unclassified	24	6.94713e-05	Dinoflagellata	KJ758039,KJ763588,KJ762844,KJ758217,KJ758256,KJ758050,KJ758255	0.969697,0.969697,0.966667,0.966667,0.966667,0.963636,0.963636	NCBI Hits Summary
OTU228	Eukaryota;Stramenopiles;	Eukaryota;SAR;Stramenopiles;Ochrophyta;Chrysophyceae;	Eukaryota;Ochrophyta_ph;Chrysophyceae;Chrysophyceae_unclassified;Chrysophyceae_unclassified;Chrysophyceae_unclassified	24	6.94713e-05	Chrysophyceae	MG674912,FM955256,MG674905,AY651092,EF432525	0.960366,0.960366,0.954268,0.954268,0.954268	NCBI Hits Summary
OTU232	Unclassified;	Eukaryota;Amorphea;Amoebozoa;Centrohelida;	Eukaryota;Eukaryota_unclassified;Eukaryota_unclassified;Eukaryota_unclassified;Eukaryota_unclassified;Eukaryota_unclassified	24	0.000119094	Eukaryota_unclassified	FPLS01045501	0.942771	NCBI Hits Summary
OTU292	Eukaryota;environmental samples;	Eukaryota;SAR;Alveolata;	Eukaryota;Dinoflagellata;Dinoflagellata_unclassified;Dinoflagellata_unclassified;Dinoflagellata_unclassified;Dinoflagellata_unclassified	24	0.000168716	Dinoflagellata	KC771146,KJ759690,KJ758167,KJ763230,KJ762965,KJ763731,KJ762730,KJ757823	0.966667,0.963636,0.963636,0.963636,0.963636,0.963636,0.963636,0.963636	NCBI Hits Summary
OTU376	Eukaryota;Stramenopiles;Bacillariophyta;Fragilariophyceae;Fragilariophycidae;	Eukaryota;SAR;Stramenopiles;Ochrophyta;Diatomea;	Eukaryota;Diatomea;Diatomea_unclassified;Diatomea_unclassified;Diatomea_unclassified;Diatomea_unclassified	24	6.45091e-05	Bacillariophyceae	EF423403,EF465465,EF465466,AY633758	0.960366,0.960366,0.951219,0.951219	NCBI Hits Summary
OTU395	Eukaryota;	Eukaryota;SAR;Alveolata;Dinoflagellata;Dinophyceae;	Eukaryota;Dinoflagellata;Dinophyceae;Peridiniphycidae_or;Thoracosphaeraceae;Thoracosphaeraceae_unclassified	24	6.94713e-05	Dinoflagellata	KC771146,KJ758066,KJ757942,KR535601,KJ763731,JF791103,KJ762965	0.963636,0.954545,0.954545,0.951515,0.951515,0.951515,0.951515	NCBI Hits Summary
OTU216	Eukaryota;	Eukaryota;Amorphea;Obazoa;Opisthokonta;Nucletmycea;Fungi;Cryptomycota;LKM11;	Eukaryota;Cryptomycota;LKM11_cl;LKM11_or;LKM11_fa;LKM11_ge	23	5.95468e-05	Cryptomycota	LC108996,EF024722,LC109039,GU070875,AB901773	0.993958,0.978852,0.975831,0.975831,0.975831	NCBI Hits Summary
OTU233	Eukaryota;Alveolata;Ciliophora;Intramacronucleata;Spirotrichea;	Eukaryota;SAR;Alveolata;Ciliophora;Intramacronucleata;Spirotrichea;Hypotrichia;	Eukaryota;Ciliophora;Intramacronucleata;Spirotrichea;Hypotrichia;Hypotrichia_ge	23	5.95468e-05	Ciliophora	AY498652,DQ490236	0.984472,0.984472	NCBI Hits Summary
OTU234	Eukaryota;environmental samples;	Eukaryota;SAR;Alveolata;	Eukaryota;Dinoflagellata;Dinophyceae;Dinophyceae_unclassified;Dinophyceae_unclassified;Dinophyceae_unclassified	23	4.96224e-05	Dinoflagellata	KC771146,KJ759690,KJ758167,KJ763230,KJ762965,KJ763731,KJ762730,KJ763426	0.963636,0.954545,0.954545,0.954545,0.954545,0.954545,0.954545,0.954545	NCBI Hits Summary
OTU235	Eukaryota;	Eukaryota;SAR;Stramenopiles;Ochrophyta;Chrysophyceae;	Eukaryota;Ochrophyta_ph;Chrysophyceae;Chrysophyceae_unclassified;Chrysophyceae_unclassified;Chrysophyceae_unclassified	23	0.000129018	Chrysophyceae	KU743841,FR865768,FM955256	0.960366,0.935976,0.929878	NCBI Hits Summary
OTU244	Eukaryota;	Eukaryota;SAR;Alveolata;Ciliophora;Intramacronucleata;Spirotrichea;Hypotrichia;	Eukaryota;Ciliophora;Intramacronucleata;Spirotrichea;Hypotrichia;Stylonychia	23	6.45091e-05	Ciliophora	GU070878	1	NCBI Hits Summary
OTU299	Eukaryota;Alveolata;Ciliophora;	Eukaryota;SAR;Alveolata;Ciliophora;Intramacronucleata;Conthreep;Oligohymenophorea;Peritrichia;	Eukaryota;Ciliophora;Intramacronucleata;Conthreep;Oligohymenophorea;Peritrichia_ge	23	5.95468e-05	Ciliophora	AF401522,GU187053	0.996753,0.987013	NCBI Hits Summary
OTU300	Unclassified;	Eukaryota;SAR;Stramenopiles;Ochrophyta;Chrysophyceae;	Eukaryota;Ochrophyta_ph;Chrysophyceae;Chrysophyceae_unclassified;Chrysophyceae_unclassified;Chrysophyceae_unclassified	23	0.000253074	Chrysophyceae	AF123289,EF024325,U42382	0.945122,0.939024,0.939024	NCBI Hits Summary
OTU346	Eukaryota;Stramenopiles;Bacillariophyta;Coscinodiscophyceae;Coscinodiscophycidae;Aulacoseiraceae;Aulacoseira;	Eukaryota;SAR;Stramenopiles;Ochrophyta;Diatomea;Coscinodiscophytina;Melosirids;Aulacoseira;	Eukaryota;Diatomea;Coscinodiscophytina_cl;Coscinodiscophytina_or;Melosirids;Aulacoseira	23	0.000129018	Bacillariophyceae	AY121820	0.972727	NCBI Hits Summary
OTU375	Unclassified;	Eukaryota;Amorphea;Amoebozoa;SAR;Stramenopiles;Labyrinthulomycetes;Sorodiplophrys;	Eukaryota;Eukaryota_unclassified;Eukaryota_unclassified;Eukaryota_unclassified;Eukaryota_unclassified;Eukaryota_unclassified	23	5.95468e-05	Eukaryota_unclassified	FPLS01016464	0.961194	NCBI Hits Summary
OTU461	Eukaryota;Alveolata;	Eukaryota;SAR;Alveolata;Ciliophora;Intramacronucleata;Spirotrichea;	Eukaryota;Ciliophora;Intramacronucleata;Spirotrichea;Spirotrichea_unclassified;Spirotrichea_unclassified	23	0.000109169	Ciliophora	EU162620,AF508775,AF164137,KC404828	0.946708,0.937304,0.934169,0.934169	NCBI Hits Summary
OTU617	Eukaryota;	Eukaryota;SAR;Alveolata;	Eukaryota;Dinoflagellata;Dinoflagellata_unclassified;Dinoflagellata_unclassified;Dinoflagellata_unclassified;Dinoflagellata_unclassified	23	6.45091e-05	Dinoflagellata	KC771146,DQ103862,AY251288,FN557541,AF521100,AY664974,LK934662	0.969512,0.969512,0.969512,0.969512,0.963415,0.963415,0.963415	NCBI Hits Summary
OTU237	Unclassified;	Eukaryota;SAR;Alveolata;Ciliophora;Intramacronucleata;Conthreep;Prostomatea;Cryptocaryon;	Eukaryota;Eukaryota_unclassified;Eukaryota_unclassified;Eukaryota_unclassified;Eukaryota_unclassified;Eukaryota_unclassified	22	7.93958e-05	Ciliophora	EU162617,DQ244026,DQ244032	0.935385,0.92,0.92	NCBI Hits Summary
OTU238	Eukaryota;	Eukaryota;SAR;Alveolata;Dinoflagellata;Dinophyceae;	Eukaryota;Dinoflagellata;Dinophyceae;Dinophyceae_unclassified;Dinophyceae_unclassified;Dinophyceae_unclassified	22	6.94713e-05	Dinoflagellata	DQ103862,JN090875,KJ758050,FN557541,AY251288,JF791101,KJ763731	0.966667,0.963636,0.963636,0.963636,0.960606,0.960606,0.960606	NCBI Hits Summary
OTU247	Eukaryota;Fungi;Dikarya;Basidiomycota;Agaricomycotina;Tremellomycetes;Filobasidiales;Filobasidiaceae;Naganishia;	Eukaryota;Amorphea;Obazoa;Opisthokonta;Nucletmycea;Fungi;Dikarya;Basidiomycota;Agaricomycotina;Tremellomycetes;Filobasidiales;Filobasidiaceae;Naganishia;	Eukaryota;Basidiomycota;Tremellomycetes;Filobasidiales;Filobasidiaceae;Naganishia	22	7.44336e-05	Basidiomycota	AB032639,AB032620,AB032618,AB032616,AB032615,AB032656,AB032623,AB032652	1,1,1,1,1,0.996997,0.996997,0.996997	NCBI Hits Summary
OTU248	Unclassified;	Eukaryota;Cryptophyceae;Cryptomonadales;	Eukaryota;Cryptophyceae_ph;Cryptophyceae_cl;Cryptomonadales;Cryptomonadales_fa;Teleaulax	22	9.42825e-05	Cryptophyceae	FPLK01002077,GU290109,KJ762964	0.993846,0.993846,0.990769	NCBI Hits Summary
OTU251	Eukaryota;	Eukaryota;SAR;Alveolata;	Eukaryota;Dinoflagellata;Dinophyceae;Peridiniphycidae_or;Thoracosphaeraceae;Thoracosphaeraceae_unclassified	22	5.45846e-05	Dinoflagellata	KC771146,AY251288	0.971609,0.962145	NCBI Hits Summary
OTU274	Eukaryota;Viridiplantae;Chlorophyta;Chlorophyceae;	Eukaryota;Archaeplastida;Chloroplastida;Chlorophyta;Chlorophyceae;	Eukaryota;Chlorophyta_ph;Chlorophyceae;Chlorophyceae_or;Chlorophyceae_fa;Chlorophyceae_ge	22	0.000109169	Chlorophyta	HF920638	0.966565	NCBI Hits Summary
OTU351	Eukaryota;Viridiplantae;Chlorophyta;	Eukaryota;Archaeplastida;Chloroplastida;Chlorophyta;Ulvophyceae;	Eukaryota;Chlorophyta_ph;Ulvophyceae;Ulvophyceae_or;Ulvophyceae_fa;Ulvophyceae_ge	22	8.93203e-05	Chlorophyta	FR865654,MF034602,Z47996,Z28970,MF034601	0.957055,0.957055,0.957055,0.941718,0.941718	NCBI Hits Summary
OTU888	Eukaryota;	Eukaryota;SAR;Alveolata;	Eukaryota;Eukaryota_unclassified;Eukaryota_unclassified;Eukaryota_unclassified;Eukaryota_unclassified;Eukaryota_unclassified	22	8.93203e-05	Eukaryota_unclassified	EF058253	0.957576	NCBI Hits Summary
OTU254	Eukaryota;	Eukaryota;SAR;Alveolata;Ciliophora;Intramacronucleata;Litostomatea;Haptoria;	Eukaryota;Ciliophora;Intramacronucleata;Litostomatea;Litostomatea_unclassified;Litostomatea_unclassified	21	0.000119094	Ciliophora	AB505478	0.966777	NCBI Hits Summary
OTU256	Unclassified;	Eukaryota;SAR;Stramenopiles;Ochrophyta;Chrysophyceae;	Eukaryota;Ochrophyta_ph;Chrysophyceae;Chromulinales;Chromulinales_fa;Chromulinales_fa_unclassified	21	0.000119094	Chrysophyceae	AY651093,FPLS01038393	0.948171,0.914634	NCBI Hits Summary
OTU259	Eukaryota;	Eukaryota;SAR;Alveolata;Ciliophora;Intramacronucleata;Spirotrichea;Choreotrichia;	Eukaryota;Ciliophora;Intramacronucleata;Spirotrichea;Choreotrichia;Choreotrichia_unclassified	21	5.45846e-05	Ciliophora	AY143573,HQ219462	0.981191,0.934169	NCBI Hits Summary
OTU260	Eukaryota;	Eukaryota;SAR;Alveolata;	Eukaryota;Dinoflagellata;Dinophyceae;Dinophyceae_unclassified;Dinophyceae_unclassified;Dinophyceae_unclassified	21	4.96224e-05	Dinoflagellata	KC771146,KJ763731,KJ758116,KJ760672,KR535601,KJ763230,KJ763426	0.993569,0.983923,0.983923,0.983923,0.983923,0.983923,0.983923	NCBI Hits Summary
OTU266	Eukaryota;Stramenopiles;Bacillariophyta;Bacillariophyceae;Bacillariophycidae;	Eukaryota;SAR;Stramenopiles;Ochrophyta;Diatomea;Bacillariophytina;Bacillariophyceae;	Eukaryota;Diatomea;Bacillariophyceae;Bacillariophyceae_or;Bacillariophyceae_fa;Bacillariophyceae_fa_unclassified	21	5.45846e-05	Bacillariophyceae	AM501989,AM502037,AJ243064	0.990826,0.990826,0.987768	NCBI Hits Summary
OTU275	Unclassified;	Unclassified;	Eukaryota;Eukaryota_unclassified;Eukaryota_unclassified;Eukaryota_unclassified;Eukaryota_unclassified;Eukaryota_unclassified	21	5.95468e-05	Eukaryota_unclassified			NCBI Hits Summary
OTU285	Eukaryota;	Eukaryota;SAR;Alveolata;	Eukaryota;Dinoflagellata;Dinophyceae;Dinophyceae_unclassified;Dinophyceae_unclassified;Dinophyceae_unclassified	21	5.45846e-05	Dinoflagellata	KC771146,KJ763426,KJ763731,KJ762965,KJ758116,KJ763230,KJ762730	0.98452,0.972136,0.972136,0.972136,0.972136,0.972136,0.972136	NCBI Hits Summary
OTU310	Eukaryota;	Eukaryota;SAR;Alveolata;	Eukaryota;Dinoflagellata;Dinoflagellata_unclassified;Dinoflagellata_unclassified;Dinoflagellata_unclassified;Dinoflagellata_unclassified	21	9.42825e-05	Dinoflagellata	KJ757926,KJ762196,KJ762571,KJ760486,JF791060,JF791024,HM581709,KJ759327	0.960486,0.960486,0.960486,0.957447,0.957447,0.957447,0.957447,0.957447	NCBI Hits Summary
OTU325	Eukaryota;	Eukaryota;SAR;Stramenopiles;Ochrophyta;Diatomea;Bacillariophytina;Bacillariophyceae;	Eukaryota;Diatomea;Bacillariophyceae;Bacillariophyceae_or;Bacillariophyceae_fa;Amphora	21	0.000104207	Bacillariophyceae	KJ961662,AM502022,KJ961660,KU179126,KC771145	0.996933,0.996933,0.996933,0.98773,0.98773	NCBI Hits Summary
OTU405	Eukaryota;	Eukaryota;SAR;Alveolata;	Eukaryota;Dinoflagellata;Dinophyceae;Dinophyceae_unclassified;Dinophyceae_unclassified;Dinophyceae_unclassified	21	5.95468e-05	Dinoflagellata	KC771146,AY251288	0.960606,0.954545	NCBI Hits Summary
OTU455	Eukaryota;Stramenopiles;Bacillariophyta;Bacillariophyceae;Bacillariophycidae;Naviculales;Sellaphoraceae;Sellaphora;	Eukaryota;SAR;Stramenopiles;Ochrophyta;Diatomea;Bacillariophytina;Bacillariophyceae;Sellaphoraceae;Sellaphora;	Eukaryota;Diatomea;Bacillariophyceae;Bacillariophyceae_or;Bacillariophyceae_fa;Bacillariophyceae_fa_unclassified	21	7.44336e-05	Bacillariophyceae	EF151980,EF151962,EF151971,KJ961708,AJ544654,EF151984,KJ961680	0.996942,0.990826,0.990826,0.987768,0.987768,0.987768,0.987768	NCBI Hits Summary
OTU1193	Eukaryota;Stramenopiles;Bacillariophyta;Fragilariophyceae;	Eukaryota;SAR;Stramenopiles;Ochrophyta;Diatomea;	Eukaryota;Diatomea;Diatomea_unclassified;Diatomea_unclassified;Diatomea_unclassified;Diatomea_unclassified	21	5.45846e-05	Bacillariophyceae	EF423403,AF525661,EF423414,AY633758,AY485505,KJ577850,AM497725	0.963415,0.960366,0.960366,0.960366,0.957317,0.957317,0.957317	NCBI Hits Summary
OTU258	Unclassified;	Eukaryota;SAR;Alveolata;Ciliophora;Intramacronucleata;Conthreep;Oligohymenophorea;Peritrichia;	Eukaryota;Ciliophora;Intramacronucleata;Conthreep;Oligohymenophorea;Peritrichia_ge	20	4.96224e-05	Ciliophora	AB473925,AY082994,KX465172,KX465171	0.993464,0.970588,0.96732,0.96732	NCBI Hits Summary
OTU261	Eukaryota;Stramenopiles;Bacillariophyta;Fragilariophyceae;Fragilariophycidae;	Eukaryota;SAR;Stramenopiles;Ochrophyta;Diatomea;Coscinodiscophytina;Fragilariales;Fragilaria;	Eukaryota;Diatomea;Coscinodiscophytina_cl;Fragilariales;Fragilariales_fa;Fragilariales_fa_unclassified	20	8.4358e-05	Bacillariophyceae	AJ535137,EF465469,EF465478,AM497738,AM497722,AM497721,EF423405	0.938838,0.938838,0.938838,0.938838,0.938838,0.93578,0.93578	NCBI Hits Summary
OTU262	Eukaryota;	Eukaryota;SAR;Alveolata;	Eukaryota;Dinoflagellata;Dinophyceae;Peridiniphycidae_or;Thoracosphaeraceae;Thoracosphaeraceae_unclassified	20	4.96224e-05	Dinoflagellata	KC771146,KJ762965,KR535601,KJ762730,KJ758116,KJ763230,KJ763426	0.984472,0.97205,0.97205,0.97205,0.97205,0.97205,0.97205	NCBI Hits Summary
OTU320	Unclassified;	Unclassified;	Eukaryota;Eukaryota_unclassified;Eukaryota_unclassified;Eukaryota_unclassified;Eukaryota_unclassified;Eukaryota_unclassified	20	0.000183603	Eukaryota_unclassified			NCBI Hits Summary
OTU321	Eukaryota;Stramenopiles;	Eukaryota;SAR;Stramenopiles;Ochrophyta;Diatomea;Bacillariophytina;Mediophyceae;Thalassiosira;	Eukaryota;Diatomea;Mediophyceae;Mediophyceae_or;Mediophyceae_fa;Mediophyceae_fa_unclassified	20	7.44336e-05	Bacillariophyceae	JQ782074,JQ781887,AM050629,DQ093366,GU823614,EU050968	0.97281,0.97281,0.97281,0.969788,0.969788,0.966767	NCBI Hits Summary
OTU406	Eukaryota;	Eukaryota;SAR;Alveolata;	Eukaryota;Dinoflagellata;Dinophyceae;Peridiniphycidae_or;Thoracosphaeraceae;Thoracosphaeraceae_unclassified	20	7.44336e-05	Dinoflagellata	KC771146,KJ763426,KJ762730,KJ762965,KR535601,KJ763230,KJ758116	0.969697,0.957576,0.957576,0.957576,0.957576,0.957576,0.957576	NCBI Hits Summary
OTU241	Unclassified;	Unclassified;	Eukaryota;Diatomea;Diatomea_unclassified;Diatomea_unclassified;Diatomea_unclassified;Diatomea_unclassified	19	0.000218338	Bacillariophyceae			NCBI Hits Summary
OTU263	Unclassified;	Eukaryota;SAR;Alveolata;Ciliophora;Intramacronucleata;Litostomatea;Haptoria;	Eukaryota;Ciliophora;Intramacronucleata;Litostomatea;Haptoria;Amphileptus	19	4.96224e-05	Ciliophora	KY355510	1	NCBI Hits Summary
OTU268	Unclassified;	Eukaryota;SAR;Stramenopiles;MAST-12;MAST-12C;	Eukaryota;MAST-12;MAST-12A;MAST-12A_or;MAST-12A_fa;MAST-12A_ge	19	5.95468e-05	MAST-12A	FPLS01035654,FPLS01059933	0.945946,0.945946	NCBI Hits Summary
OTU269	Unclassified;	Eukaryota;SAR;Alveolata;Ciliophora;Intramacronucleata;Spirotrichea;Euplotia;Aspidisca;	Eukaryota;Ciliophora;Intramacronucleata;Spirotrichea;Euplotia;Aspidisca	19	4.96224e-05	Ciliophora	FPLP01008715,FPLP01013487	0.967742,0.935484	NCBI Hits Summary
OTU270	Eukaryota;Stramenopiles;	Eukaryota;SAR;Stramenopiles;Ochrophyta;Chrysophyceae;	Eukaryota;Ochrophyta_ph;Chrysophyceae;Chrysophyceae_unclassified;Chrysophyceae_unclassified;Chrysophyceae_unclassified	19	8.93203e-05	Chrysophyceae	M87332,AY651092,MG674913	0.944954,0.938838,0.938838	NCBI Hits Summary
OTU272	Eukaryota;	Eukaryota;SAR;Alveolata;Ciliophora;Intramacronucleata;Conthreep;Prostomatea;Cryptocaryon;	Eukaryota;Ciliophora;Intramacronucleata;Intramacronucleata_unclassified;Intramacronucleata_unclassified;Intramacronucleata_unclassified	19	9.92447e-05	Ciliophora	FJ876971	0.962848	NCBI Hits Summary
OTU277	Eukaryota;	Eukaryota;SAR;Stramenopiles;Hyphochytriomycetes;Hyphochytriales;	Eukaryota;Hyphochytriomycetes;Hyphochytriomycetes_cl;Hyphochytriales;Hyphochytriales_fa;Rhizidiomyces	19	9.92447e-05	Hyphochytriomycetes	EU162648	0.954128	NCBI Hits Summary
OTU279	Eukaryota;	Eukaryota;Archaeplastida;Chloroplastida;	Eukaryota;Eukaryota_unclassified;Eukaryota_unclassified;Eukaryota_unclassified;Eukaryota_unclassified;Eukaryota_unclassified	19	3.47357e-05	Eukaryota_unclassified	AB183628	0.948328	NCBI Hits Summary
OTU280	Unclassified;	Eukaryota;Amorphea;Amoebozoa;SAR;Stramenopiles;Labyrinthulomycetes;Sorodiplophrys;	Eukaryota;Eukaryota_unclassified;Eukaryota_unclassified;Eukaryota_unclassified;Eukaryota_unclassified;Eukaryota_unclassified	19	9.42825e-05	Eukaryota_unclassified	FPLS01016464	0.937126	NCBI Hits Summary
OTU286	Unclassified;	Unclassified;	Eukaryota;Eukaryota_unclassified;Eukaryota_unclassified;Eukaryota_unclassified;Eukaryota_unclassified;Eukaryota_unclassified	19	3.47357e-05	Eukaryota_unclassified			NCBI Hits Summary
OTU481	Eukaryota;	Eukaryota;SAR;Alveolata;Dinoflagellata;Dinophyceae;	Eukaryota;Dinoflagellata;Dinophyceae;Dinophyceae_unclassified;Dinophyceae_unclassified;Dinophyceae_unclassified	19	5.95468e-05	Dinoflagellata	KC771146,DQ103862,AY590483,LK934662,KJ757829	0.960606,0.957576,0.954545,0.954545,0.954545	NCBI Hits Summary
OTU527	Eukaryota;	Eukaryota;SAR;Alveolata;Dinoflagellata;Dinophyceae;	Eukaryota;Dinoflagellata;Dinophyceae;Peridiniphycidae_or;Thoracosphaeraceae;Thoracosphaeraceae_unclassified	19	0.000129018	Dinoflagellata	DQ103862,JN090875,AY121856,AY251288	0.963636,0.960606,0.957576,0.957576	NCBI Hits Summary
OTU972	Eukaryota;Alveolata;	Eukaryota;SAR;Alveolata;Ciliophora;Intramacronucleata;Spirotrichea;Hypotrichia;	Eukaryota;Ciliophora;Intramacronucleata;Spirotrichea;Hypotrichia;Halteria	19	0.000109169	Ciliophora	DQ244036,DQ244039,LN870033,AF164125,AF164135,FPLS01060944,AM412767	0.936909,0.936909,0.92429,0.92429,0.92429,0.92429,0.92429	NCBI Hits Summary
OTU287	Eukaryota;Fungi;	Eukaryota;Amorphea;Obazoa;Opisthokonta;Nucletmycea;Fungi;Chytridiomycota;Incertae Sedis;Chytridiomycetes;	Eukaryota;Chytridiomycota;Chytridiomycetes;Chytridiales;Incertae_Sedis;Incertae_Sedis_unclassified	18	9.92447e-05	Chytridiomycota	GQ995264	0.948795	NCBI Hits Summary
OTU307	Eukaryota;Rhizaria;Cercozoa;environmental samples;	Eukaryota;SAR;Rhizaria;Cercozoa;Novel Clade 10;	Eukaryota;Eukaryota_unclassified;Eukaryota_unclassified;Eukaryota_unclassified;Eukaryota_unclassified;Eukaryota_unclassified	18	6.94713e-05	Cercozoa			NCBI Hits Summary
OTU339	Eukaryota;Stramenopiles;Bacillariophyta;Fragilariophyceae;Fragilariophycidae;	Eukaryota;SAR;Stramenopiles;Ochrophyta;Diatomea;	Eukaryota;Diatomea;Diatomea_unclassified;Diatomea_unclassified;Diatomea_unclassified;Diatomea_unclassified	18	4.96224e-05	Bacillariophyceae	EF423403,EF465465,AY633758	0.960366,0.960366,0.951219	NCBI Hits Summary
OTU522	Eukaryota;Alveolata;Ciliophora;	Eukaryota;SAR;Alveolata;Ciliophora;Intramacronucleata;Conthreep;Oligohymenophorea;Peritrichia;	Eukaryota;Ciliophora;Intramacronucleata;Conthreep;Oligohymenophorea;Peritrichia_ge	18	4.46601e-05	Ciliophora	DQ487201,KX465164,KF141789,GQ872429	0.983766,0.980519,0.977273,0.977273	NCBI Hits Summary
OTU568	Unclassified;	Eukaryota;SAR;Stramenopiles;Ochrophyta;Chrysophyceae;	Eukaryota;Ochrophyta_ph;Chrysophyceae;Chrysophyceae_unclassified;Chrysophyceae_unclassified;Chrysophyceae_unclassified	18	0.000104207	Chrysophyceae	EF165147	0.963415	NCBI Hits Summary
OTU264	Unclassified;	Eukaryota;Amorphea;Amoebozoa;SAR;Stramenopiles;Labyrinthulomycetes;Sorodiplophrys;	Eukaryota;Eukaryota_unclassified;Eukaryota_unclassified;Eukaryota_unclassified;Eukaryota_unclassified;Eukaryota_unclassified	17	4.96224e-05	Eukaryota_unclassified	FPLS01016464	0.927928	NCBI Hits Summary
OTU267	Unclassified;	Eukaryota;Amorphea;Amoebozoa;SAR;Stramenopiles;Labyrinthulomycetes;Sorodiplophrys;	Eukaryota;Eukaryota_unclassified;Eukaryota_unclassified;Eukaryota_unclassified;Eukaryota_unclassified;Eukaryota_unclassified	17	4.46601e-05	Eukaryota_unclassified	FPLS01016464	0.955357	NCBI Hits Summary
OTU289	Unclassified;	Eukaryota;SAR;Stramenopiles;Ochrophyta;Chrysophyceae;	Eukaryota;Ochrophyta_ph;Chrysophyceae;Chrysophyceae_unclassified;Chrysophyceae_unclassified;Chrysophyceae_unclassified	17	8.4358e-05	Chrysophyceae	AF123296,EF165132	0.984756,0.957317	NCBI Hits Summary
OTU290	Eukaryota;Fungi;Dikarya;Basidiomycota;Ustilaginomycotina;Malasseziomycetes;Malasseziales;Malasseziaceae;Malassezia;	Eukaryota;Amorphea;Obazoa;Opisthokonta;Nucletmycea;Fungi;Dikarya;Basidiomycota;Ustilaginomycotina;Malasseziomycetes;Malasseziales;Malasseziaceae;Malassezia;	Eukaryota;Basidiomycota;Malasseziomycetes;Malasseziales;Malasseziaceae;Malassezia	17	8.93203e-05	Basidiomycota	AAYY01000016,EU192364,CP030254,CP030254,CP030254,CP033152,CP030254	1,1,0.987915,0.987915,0.987915,0.987915,0.987915	NCBI Hits Summary
OTU291	Unclassified;	Eukaryota;SAR;Alveolata;Protalveolata;Perkinsidae;A31;	Eukaryota;Protalveolata;Perkinsidae;A31;A31_fa;A31_ge	17	8.4358e-05	Perkinsidae	EU162629,FPLS01058904	0.950769,0.929231	NCBI Hits Summary
OTU295	Unclassified;	Eukaryota;SAR;Rhizaria;Cercozoa;Thecofilosea;	Eukaryota;Cercozoa;Thecofilosea;Cryomonadida;Rhizaspididae;Rhogostoma	17	8.93203e-05	Cercozoa	EU371159,FPLS01014549	0.960725,0.94864	NCBI Hits Summary
OTU332	Eukaryota;Stramenopiles;Bacillariophyta;Coscinodiscophyceae;Coscinodiscophycidae;Aulacoseiraceae;Aulacoseira;	Eukaryota;SAR;Stramenopiles;Ochrophyta;Diatomea;Coscinodiscophytina;Melosirids;Aulacoseira;	Eukaryota;Diatomea;Coscinodiscophytina_cl;Coscinodiscophytina_or;Melosirids;Aulacoseira	17	0.000129018	Bacillariophyceae	AY121820	0.957576	NCBI Hits Summary
OTU336	Eukaryota;environmental samples;	Eukaryota;SAR;Alveolata;	Eukaryota;Eukaryota_unclassified;Eukaryota_unclassified;Eukaryota_unclassified;Eukaryota_unclassified;Eukaryota_unclassified	17	7.93958e-05	Eukaryota_unclassified	KJ758503,KJ762691,KJ762416,KJ762321,KJ763359,KJ759500,KJ763108,HM581708	0.939024,0.929878,0.929878,0.929878,0.929878,0.929878,0.929878,0.929878	NCBI Hits Summary
OTU411	Eukaryota;Stramenopiles;	Eukaryota;SAR;Stramenopiles;Ochrophyta;Eustigmatophyceae;Eustigmatales;Nannochloropsis;	Eukaryota;Ochrophyta_ph;Eustigmatophyceae;Eustigmatales;Eustigmatales_fa;Nannochloropsis	17	2.48112e-05	Eustigmatophyceae	GQ122355,AF045042,FJ153674	0.966049,0.966049,0.962963	NCBI Hits Summary
OTU429	Eukaryota;Stramenopiles;Bacillariophyta;Coscinodiscophyceae;	Eukaryota;SAR;Stramenopiles;Ochrophyta;Diatomea;	Eukaryota;Diatomea;Diatomea_unclassified;Diatomea_unclassified;Diatomea_unclassified;Diatomea_unclassified	17	0.000109169	Bacillariophyceae	AB831890,AY121820,JF791059,DQ093369,AY121822,AJ810854	0.933333,0.930303,0.927273,0.927273,0.927273,0.927273	NCBI Hits Summary
OTU447	Eukaryota;	Eukaryota;SAR;Alveolata;Ciliophora;Intramacronucleata;Litostomatea;	Eukaryota;Ciliophora;Intramacronucleata;Litostomatea;Haptoria;Didinium	17	7.93958e-05	Ciliophora	KX465195	0.980132	NCBI Hits Summary
OTU506	Eukaryota;	Eukaryota;SAR;Stramenopiles;Ochrophyta;Chrysophyceae;	Eukaryota;Ochrophyta_ph;Chrysophyceae;Chrysophyceae_unclassified;Chrysophyceae_unclassified;Chrysophyceae_unclassified	17	9.42825e-05	Chrysophyceae	MG674913	0.945122	NCBI Hits Summary
OTU544	Eukaryota;environmental samples;	Eukaryota;SAR;Alveolata;	Eukaryota;Dinoflagellata;Dinophyceae;Gymnodiniphycidae;Gymnodinium_clade;Gymnodinium_clade_unclassified	17	2.48112e-05	Dinoflagellata	KJ758547,DQ103871,KJ757985,KJ758254,KJ757452,KJ758214,KJ759489,KJ759537	0.954545,0.954545,0.951515,0.951515,0.951515,0.951515,0.951515,0.951515	NCBI Hits Summary
OTU301	Eukaryota;	Eukaryota;SAR;Alveolata;Dinoflagellata;Dinophyceae;	Eukaryota;Dinoflagellata;Dinophyceae;Dinophyceae_unclassified;Dinophyceae_unclassified;Dinophyceae_unclassified	16	4.46601e-05	Dinoflagellata	FN557541,DQ103862,AY251288,AY121856	0.969697,0.969697,0.966667,0.963636	NCBI Hits Summary
OTU318	Unclassified;	Eukaryota;Amorphea;Amoebozoa;Centrohelida;	Eukaryota;Eukaryota_unclassified;Eukaryota_unclassified;Eukaryota_unclassified;Eukaryota_unclassified;Eukaryota_unclassified	16	6.94713e-05	Eukaryota_unclassified	FPLS01020445	0.937126	NCBI Hits Summary
OTU569	Eukaryota;environmental samples;	Eukaryota;SAR;	Eukaryota;Eukaryota_unclassified;Eukaryota_unclassified;Eukaryota_unclassified;Eukaryota_unclassified;Eukaryota_unclassified	16	6.45091e-05	Eukaryota_unclassified	JF791089,KJ758377,KJ758049,FLLY01000077,KJ757950,KJ762691,HM581708	0.93921,0.93617,0.93617,0.93617,0.933131,0.933131,0.933131	NCBI Hits Summary
OTU581	Eukaryota;	Eukaryota;SAR;Stramenopiles;Ochrophyta;Diatomea;Bacillariophytina;Bacillariophyceae;	Eukaryota;Diatomea;Bacillariophyceae;Bacillariophyceae_or;Bacillariophyceae_fa;Bacillariophyceae_fa_unclassified	16	4.46601e-05	Bacillariophyceae	KC771191,KC771177,KC771173,AJ867279,HM805036,KC771171,KC771164,KC771179	0.963526,0.963526,0.963526,0.963526,0.963526,0.963526,0.963526,0.960486	NCBI Hits Summary
OTU862	Eukaryota;environmental samples;	Eukaryota;SAR;Alveolata;Dinoflagellata;Dinophyceae;	Eukaryota;Dinoflagellata;Dinophyceae;Dinophyceae_unclassified;Dinophyceae_unclassified;Dinophyceae_unclassified	16	7.44336e-05	Dinoflagellata	DQ103862,KJ757829,KJ758051,KJ758207,KC771146,KJ757885,KJ758116,KJ763731	0.963526,0.963526,0.963526,0.963526,0.963526,0.960486,0.960486,0.960486	NCBI Hits Summary
OTU1267	Eukaryota;	Eukaryota;Archaeplastida;Chloroplastida;Chlorophyta;Chlorophyceae;	Eukaryota;Chlorophyta_ph;Chlorophyta_ph_unclassified;Chlorophyta_ph_unclassified;Chlorophyta_ph_unclassified;Chlorophyta_ph_unclassified	16	5.95468e-05	Chlorophyta	HQ191368	0.942073	NCBI Hits Summary
OTU296	Unclassified;	Eukaryota;SAR;Alveolata;	Eukaryota;Eukaryota_unclassified;Eukaryota_unclassified;Eukaryota_unclassified;Eukaryota_unclassified;Eukaryota_unclassified	15	7.44336e-05	Eukaryota_unclassified	KJ763140	0.975385	NCBI Hits Summary
OTU304	Unclassified;	Eukaryota;SAR;Rhizaria;Cercozoa;	Eukaryota;Cercozoa;Cercozoa_unclassified;Cercozoa_unclassified;Cercozoa_unclassified;Cercozoa_unclassified	15	8.93203e-05	Cercozoa	EF024788,DQ211593	0.935976,0.926829	NCBI Hits Summary
OTU308	Eukaryota;Viridiplantae;Chlorophyta;Trebouxiophyceae;	Eukaryota;Archaeplastida;Chloroplastida;Chlorophyta;Trebouxiophyceae;	Eukaryota;Chlorophyta_ph;Chlorophyta_ph_unclassified;Chlorophyta_ph_unclassified;Chlorophyta_ph_unclassified;Chlorophyta_ph_unclassified	15	5.45846e-05	Chlorophyta/Trebouxiophyceae	FJ946890,FM205862,JF951858,FM205880,MF070534,GEEU01031855,FM205851	0.972644,0.972644,0.966565,0.966565,0.966565,0.966565,0.963526	NCBI Hits Summary
OTU315	Unclassified;	Unclassified;	Eukaryota;Eukaryota_unclassified;Eukaryota_unclassified;Eukaryota_unclassified;Eukaryota_unclassified;Eukaryota_unclassified	15	5.45846e-05	Eukaryota_unclassified			NCBI Hits Summary
OTU422	Eukaryota;environmental samples;	Eukaryota;SAR;Alveolata;	Eukaryota;Dinoflagellata;Dinophyceae;Dinophyceae_unclassified;Dinophyceae_unclassified;Dinophyceae_unclassified	15	6.45091e-05	Dinoflagellata	KJ763588,KJ758039,KJ758217,KJ762844,KJ758256,KJ758345,KJ759088	0.963636,0.963636,0.960606,0.960606,0.960606,0.957576,0.957576	NCBI Hits Summary
OTU428	Eukaryota;Viridiplantae;Chlorophyta;Ulvophyceae;	Eukaryota;Archaeplastida;Chloroplastida;Chlorophyta;Ulvophyceae;	Eukaryota;Chlorophyta_ph;Ulvophyceae;Ulvophyceae_or;Ulvophyceae_fa;Ulvophyceae_ge	15	6.45091e-05	Chlorophyta	MF034602,Z47996,FR865654,Z28970,MF034601	0.957055,0.957055,0.957055,0.941718,0.941718	NCBI Hits Summary
OTU526	Eukaryota;Stramenopiles;	Eukaryota;SAR;Stramenopiles;Ochrophyta;Eustigmatophyceae;Eustigmatales;Nannochloropsis;	Eukaryota;Ochrophyta_ph;Eustigmatophyceae;Eustigmatales;Eustigmatales_fa;Nannochloropsis	15	2.48112e-05	Eustigmatophyceae	AF045042,GQ122355,KC594687	0.966049,0.966049,0.962963	NCBI Hits Summary
OTU625	Eukaryota;environmental samples;	Eukaryota;SAR;Alveolata;Dinoflagellata;	Eukaryota;Dinoflagellata;Dinophyceae;Dinophyceae_unclassified;Dinophyceae_unclassified;Dinophyceae_unclassified	15	5.45846e-05	Dinoflagellata	KJ758318,KJ758217,KJ762844,KJ759088,KJ758345,AM503929	0.969697,0.969697,0.969697,0.966667,0.966667,0.963636	NCBI Hits Summary
OTU697	Eukaryota;	Eukaryota;SAR;Stramenopiles;Ochrophyta;Eustigmatophyceae;Eustigmatales;Nannochloropsis;	Eukaryota;Ochrophyta_ph;Eustigmatophyceae;Eustigmatales;Eustigmatales_fa;Nannochloropsis	15	2.48112e-05	Eustigmatophyceae	AF045042,GQ122355,KC594687	0.956522,0.956522,0.953416	NCBI Hits Summary
OTU719	Eukaryota;	Eukaryota;SAR;Alveolata;Dinoflagellata;Dinophyceae;	Eukaryota;Dinoflagellata;Dinophyceae;Dinophyceae_unclassified;Dinophyceae_unclassified;Dinophyceae_unclassified	15	3.96979e-05	Dinoflagellata	KJ757816,KJ758152,KJ758203,KJ758334,KJ757777,KJ759378,KJ763394,AF022199	0.966667,0.966667,0.966667,0.966667,0.963636,0.963636,0.963636,0.963636	NCBI Hits Summary
OTU798	Eukaryota;Stramenopiles;Chrysophyceae;	Eukaryota;SAR;Stramenopiles;Ochrophyta;Chrysophyceae;	Eukaryota;Ochrophyta_ph;Chrysophyceae;Chrysophyceae_unclassified;Chrysophyceae_unclassified;Chrysophyceae_unclassified	15	8.4358e-05	Chrysophyceae	MG674913,AF123293,AB749134,FPLS01004254	0.936364,0.930303,0.927273,0.927273	NCBI Hits Summary
OTU865	Eukaryota;	Eukaryota;SAR;Alveolata;	Eukaryota;Dinoflagellata;Dinophyceae;Peridiniphycidae_or;Thoracosphaeraceae;Thoracosphaeraceae_ge	15	0.000114131	Dinoflagellata	DQ103862,JN090875,AY121856,AY251288	0.969697,0.966667,0.963636,0.963636	NCBI Hits Summary
OTU866	Eukaryota;environmental samples;	Eukaryota;SAR;Alveolata;	Eukaryota;Dinoflagellata;Dinophyceae;Dinophyceae_unclassified;Dinophyceae_unclassified;Dinophyceae_unclassified	15	4.46601e-05	Dinoflagellata	KJ763230,KJ759690,KJ762965,KJ758116,KJ760672,KJ763426,KJ758167,KJ757823,KJ763731	0.957447,0.957447,0.957447,0.957447,0.957447,0.957447,0.957447,0.957447,0.957447	NCBI Hits Summary
OTU894	Eukaryota;environmental samples;	Eukaryota;SAR;Alveolata;	Eukaryota;Dinoflagellata;Dinophyceae;Gymnodiniphycidae;Gymnodinium_clade;Gymnodinium_clade_unclassified	15	2.48112e-05	Dinoflagellata	KJ758547,DQ103871,KJ759537,AF022196,KJ757985,KJ758254,KJ759489,DQ103860	0.951515,0.951515,0.948485,0.948485,0.948485,0.948485,0.948485,0.948485	NCBI Hits Summary
OTU305	Unclassified;	Unclassified;	Eukaryota;Eukaryota_unclassified;Eukaryota_unclassified;Eukaryota_unclassified;Eukaryota_unclassified;Eukaryota_unclassified	14	6.45091e-05	Eukaryota_unclassified			NCBI Hits Summary
OTU313	Unclassified;	Eukaryota;SAR;Stramenopiles;Ochrophyta;Chrysophyceae;	Eukaryota;Ochrophyta_ph;Chrysophyceae;Chrysophyceae_unclassified;Chrysophyceae_unclassified;Chrysophyceae_unclassified	14	6.94713e-05	Chrysophyceae	AF123284	0.947853	NCBI Hits Summary
OTU319	Eukaryota;	Eukaryota;SAR;Alveolata;	Eukaryota;Protalveolata;Colpodellida;Colpodellida_or;Colpodellida_fa;Colpodella	14	6.45091e-05	Colpodellida	GU067926	0.993846	NCBI Hits Summary
OTU322	Eukaryota;	Eukaryota;SAR;Stramenopiles;Ochrophyta;Diatomea;Bacillariophytina;Bacillariophyceae;	Eukaryota;Diatomea;Bacillariophyceae;Bacillariophyceae_or;Bacillariophyceae_fa;Cocconeis	14	6.94713e-05	Bacillariophyceae	KC771157,KC771197,LC335883,KC771181,AM502010,KC771184,AM501989,KC771182	0.971963,0.971963,0.971963,0.971963,0.971963,0.971963,0.968847,0.968847	NCBI Hits Summary
OTU335	Eukaryota;	Eukaryota;SAR;Alveolata;Dinoflagellata;Dinophyceae;Peridiniphycidae;	Eukaryota;Dinoflagellata;Dinophyceae;Peridiniphycidae_or;Thoracosphaeraceae;Thoracosphaeraceae_unclassified	14	8.4358e-05	Dinoflagellata	JN090875,GU290116,AY121856	0.960606,0.951515,0.951515	NCBI Hits Summary
OTU385	Eukaryota;Stramenopiles;	Eukaryota;SAR;Stramenopiles;Ochrophyta;Chrysophyceae;	Eukaryota;Ochrophyta_ph;Chrysophyceae;Chrysophyceae_unclassified;Chrysophyceae_unclassified;Chrysophyceae_unclassified	14	7.44336e-05	Chrysophyceae	MG674913,U73229,U73219,U73232	0.960245,0.954128,0.954128,0.95107	NCBI Hits Summary
OTU394	unclassified sequences;metagenomes;	Eukaryota;Amorphea;Amoebozoa;SAR;Stramenopiles;Labyrinthulomycetes;Sorodiplophrys;	Eukaryota;Eukaryota_unclassified;Eukaryota_unclassified;Eukaryota_unclassified;Eukaryota_unclassified;Eukaryota_unclassified	14	3.96979e-05	Eukaryota_unclassified	FPLS01016464	0.918919	NCBI Hits Summary
OTU449	Eukaryota;	Eukaryota;SAR;Alveolata;Ciliophora;Intramacronucleata;Spirotrichea;Oligotrichia;	Eukaryota;Ciliophora;Intramacronucleata;Spirotrichea;Oligotrichia;Oligotrichia_unclassified	14	5.45846e-05	Ciliophora	KJ762027,KJ762361,KJ762449,KJ761784,FLMP01009100,KJ761923,KJ763444	0.959627,0.959627,0.953416,0.953416,0.953416,0.953416,0.953416	NCBI Hits Summary
OTU464	Eukaryota;Viridiplantae;Chlorophyta;	Eukaryota;Archaeplastida;Chloroplastida;Chlorophyta;	Eukaryota;Chlorophyta_ph;Trebouxiophyceae;Trebouxiophyceae_or;Trebouxiophyceae_fa;Trebouxiophyceae_ge	14	1.98489e-05	Chlorophyta/Trebouxiophyceae	AB080305	0.966667	NCBI Hits Summary
OTU551	Eukaryota;Stramenopiles;Bacillariophyta;Fragilariophyceae;Fragilariophycidae;	Eukaryota;SAR;Stramenopiles;Ochrophyta;Diatomea;Coscinodiscophytina;Fragilariales;Fragilaria;	Eukaryota;Diatomea;Coscinodiscophytina_cl;Fragilariales;Fragilariales_fa;Fragilariales_fa_unclassified	14	4.96224e-05	Bacillariophyceae	AM497738,AM497722,EF465478,AJ535137,EF465469,EF465492,AM497721	0.957187,0.957187,0.957187,0.957187,0.957187,0.954128,0.954128	NCBI Hits Summary
OTU317	Eukaryota;	Eukaryota;SAR;Alveolata;Ciliophora;Intramacronucleata;Conthreep;Phyllopharyngea;Suctoria;Tokophrya;	Eukaryota;Ciliophora;Intramacronucleata;Conthreep;Phyllopharyngea;Tokophrya	13	3.47357e-05	Ciliophora	AY102174	0.948718	NCBI Hits Summary
OTU324	Eukaryota;Fungi;Dikarya;Ascomycota;Saccharomycotina;Saccharomycetes;Saccharomycetales;Saccharomycetaceae;Saccharomyces;	Eukaryota;Amorphea;Obazoa;Opisthokonta;Nucletmycea;Fungi;Dikarya;Ascomycota;Saccharomycotina;Saccharomycetes;Saccharomycetales;Saccharomycetaceae;Saccharomyces;	Eukaryota;Ascomycota;Saccharomycetes;Saccharomycetales;Saccharomycetaceae;Saccharomyces	13	2.97734e-05	Ascomycota	AACI03001036,AFDF01003582,AABZ01000315,AGVY01000406,AACH01000259,AAEG01000115,AACA01000199,AFDG01003183,MQVN01000233	1,1,1,1,1,1,1,1,1	NCBI Hits Summary
OTU326	Eukaryota;environmental samples;	Eukaryota;SAR;Alveolata;	Eukaryota;Dinoflagellata;Dinophyceae;Dinophyceae_unclassified;Dinophyceae_unclassified;Dinophyceae_unclassified	13	6.94713e-05	Dinoflagellata	KJ762691,KJ757950,KJ762416,KJ759266,HM581708,KJ758503,KJ758000	0.95679,0.95679,0.953704,0.953704,0.953704,0.953704,0.950617	NCBI Hits Summary
OTU328	Eukaryota;	Eukaryota;SAR;Alveolata;	Eukaryota;Dinoflagellata;Dinophyceae;Dinophyceae_unclassified;Dinophyceae_unclassified;Dinophyceae_unclassified	13	2.97734e-05	Dinoflagellata	KC771146,KJ763731,KJ762730,KJ762965,KR535601,KJ758207,KJ763426	0.963636,0.951515,0.951515,0.951515,0.951515,0.951515,0.951515	NCBI Hits Summary
OTU337	Eukaryota;Viridiplantae;Chlorophyta;Chlorophyceae;Chlamydomonadales;	Eukaryota;Archaeplastida;Chloroplastida;Chlorophyta;Chlorophyceae;	Eukaryota;Chlorophyta_ph;Chlorophyta_ph_unclassified;Chlorophyta_ph_unclassified;Chlorophyta_ph_unclassified;Chlorophyta_ph_unclassified	13	3.47357e-05	Chlorophyta	KU886306,AB360751,KM020024,LF939062	0.981707,0.969512,0.969512,0.969512	NCBI Hits Summary
OTU338	Eukaryota;Rhizaria;Cercozoa;environmental samples;	Eukaryota;SAR;Rhizaria;Cercozoa;Novel Clade 10;	Eukaryota;Eukaryota_unclassified;Eukaryota_unclassified;Eukaryota_unclassified;Eukaryota_unclassified;Eukaryota_unclassified	13	1.98489e-05	Cercozoa	GU067921	0.929878	NCBI Hits Summary
OTU365	Eukaryota;	Eukaryota;SAR;Alveolata;Dinoflagellata;Dinophyceae;Peridiniphycidae;	Eukaryota;Dinoflagellata;Dinophyceae;Peridiniphycidae_or;Thoracosphaeraceae;Thoracosphaeraceae_unclassified	13	7.93958e-05	Dinoflagellata	JN090875,GU290116	0.978659,0.966463	NCBI Hits Summary
OTU415	Eukaryota;environmental samples;	Eukaryota;SAR;Alveolata;	Eukaryota;Dinoflagellata;Dinophyceae;Gymnodiniphycidae;Gymnodinium_clade;Gymnodinium_clade_ge	13	2.48112e-05	Dinoflagellata	DQ103871,EF526865,KJ758547,DQ103860,KJ757985,AF022196,KJ759537,KJ758254	0.951515,0.951515,0.951515,0.948485,0.948485,0.948485,0.948485,0.948485	NCBI Hits Summary
OTU489	Eukaryota;	Eukaryota;SAR;Alveolata;Dinoflagellata;Dinophyceae;	Eukaryota;Dinoflagellata;Dinophyceae;Dinophyceae_unclassified;Dinophyceae_unclassified;Dinophyceae_unclassified	13	3.47357e-05	Dinoflagellata	GU295203,KJ758334,KJ757777,KJ758152,KJ758106	0.951515,0.948485,0.945455,0.945455,0.945455	NCBI Hits Summary
OTU548	Eukaryota;	Eukaryota;SAR;Alveolata;Dinoflagellata;Dinophyceae;Peridiniphycidae;	Eukaryota;Dinoflagellata;Dinophyceae;Peridiniphycidae_or;Thoracosphaeraceae;Thoracosphaeraceae_unclassified	13	6.94713e-05	Dinoflagellata	AY121856,AY590476,AY590478,JN090875,AY590483,AY251288,AY590480	0.969697,0.969697,0.966667,0.966667,0.966667,0.963636,0.963636	NCBI Hits Summary
OTU613	Eukaryota;	Eukaryota;SAR;Alveolata;	Eukaryota;Dinoflagellata;Dinophyceae;Dinophyceae_unclassified;Dinophyceae_unclassified;Dinophyceae_unclassified	13	4.46601e-05	Dinoflagellata	KC771146,AY251288	0.951368,0.945289	NCBI Hits Summary
OTU765	Eukaryota;	Eukaryota;SAR;Stramenopiles;Ochrophyta;Chrysophyceae;	Eukaryota;Ochrophyta_ph;Chrysophyceae;Chrysophyceae_unclassified;Chrysophyceae_unclassified;Chrysophyceae_unclassified	13	6.45091e-05	Chrysophyceae	AB749145,AB695532,MG674913,U73219,FM955256,GU290105,M55285	0.942073,0.942073,0.942073,0.939024,0.939024,0.935976,0.935976	NCBI Hits Summary
OTU329	Eukaryota;Viridiplantae;Streptophyta;Embryophyta;Tracheophyta;Spermatophyta;Magnoliophyta;Liliopsida;Asparagales;	Eukaryota;Archaeplastida;Chloroplastida;Charophyta;Phragmoplastophyta;Streptophyta;Embryophyta;Tracheophyta;Spermatophyta;Magnoliophyta;Liliopsida;Asparagales;	Eukaryota;Phragmoplastophyta;Embryophyta;Magnoliophyta_or;Magnoliophyta_fa;Magnoliophyta_ge	12	5.95468e-05	Embryophyta	GFAK01076886,JQ283941	1,1	NCBI Hits Summary
OTU330	Unclassified;	Eukaryota;SAR;Alveolata;Ciliophora;Intramacronucleata;Conthreep;Prostomatea;Cryptocaryon;	Eukaryota;Eukaryota_unclassified;Eukaryota_unclassified;Eukaryota_unclassified;Eukaryota_unclassified;Eukaryota_unclassified	12	4.96224e-05	Ciliophora	EU162617,DQ244026,FPLK01002404,EU162626	0.916667,0.916667,0.910494,0.910494	NCBI Hits Summary
OTU334	Eukaryota;Stramenopiles;	Eukaryota;SAR;Stramenopiles;Ochrophyta;Chrysophyceae;	Eukaryota;Ochrophyta_ph;Chrysophyceae;Chrysophyceae_unclassified;Chrysophyceae_unclassified;Chrysophyceae_unclassified	12	6.45091e-05	Chrysophyceae	MG674905,MG674912	0.942073,0.932927	NCBI Hits Summary
OTU341	Eukaryota;	Eukaryota;SAR;Alveolata;Dinoflagellata;Dinophyceae;	Eukaryota;Dinoflagellata;Dinophyceae;Dinophyceae_unclassified;Dinophyceae_unclassified;Dinophyceae_unclassified	12	6.45091e-05	Dinoflagellata	JN090875,DQ103862	0.915152,0.909091	NCBI Hits Summary
OTU372	Unclassified;	Eukaryota;Amorphea;Amoebozoa;SAR;Stramenopiles;Labyrinthulomycetes;Sorodiplophrys;	Eukaryota;Eukaryota_unclassified;Eukaryota_unclassified;Eukaryota_unclassified;Eukaryota_unclassified;Eukaryota_unclassified	12	5.95468e-05	Eukaryota_unclassified	FPLS01016464,FPLS01058091,DQ104602	0.949102,0.91018,0.907186	NCBI Hits Summary
OTU392	Eukaryota;environmental samples;	Eukaryota;SAR;Alveolata;	Eukaryota;Dinoflagellata;Dinophyceae;Dinophyceae_unclassified;Dinophyceae_unclassified;Dinophyceae_unclassified	12	2.97734e-05	Dinoflagellata	KJ758050,KJ758255,KJ762730,KJ762965,KJ763731,DQ103862,KJ758116,KJ760672	0.975684,0.975684,0.972644,0.972644,0.972644,0.972644,0.972644,0.972644	NCBI Hits Summary
OTU433	Eukaryota;Stramenopiles;	Eukaryota;SAR;Stramenopiles;Ochrophyta;Chrysophyceae;	Eukaryota;Ochrophyta_ph;Chrysophyceae;Chrysophyceae_unclassified;Chrysophyceae_unclassified;Chrysophyceae_unclassified	12	4.96224e-05	Chrysophyceae	MG674913,AJ236861,U73219,M87332,U73229,GU290105	0.954268,0.948171,0.948171,0.948171,0.948171,0.948171	NCBI Hits Summary
OTU467	Eukaryota;	Eukaryota;SAR;Stramenopiles;Ochrophyta;Chrysophyceae;	Eukaryota;Ochrophyta_ph;Chrysophyceae;Chromulinales;Chromulinales_fa;Chromulinales_fa_unclassified	12	8.93203e-05	Chrysophyceae	AB749076,EF185316,AY651071	0.932927,0.932927,0.920732	NCBI Hits Summary
OTU484	Unclassified;	Eukaryota;SAR;Stramenopiles;Ochrophyta;Chrysophyceae;	Eukaryota;Ochrophyta_ph;Chrysophyceae;Chrysophyceae_unclassified;Chrysophyceae_unclassified;Chrysophyceae_unclassified	12	5.45846e-05	Chrysophyceae	MG674905,M55285,AB749076,U73229	0.963415,0.960366,0.957317,0.957317	NCBI Hits Summary
OTU487	Eukaryota;	Eukaryota;SAR;Alveolata;Dinoflagellata;Dinophyceae;	Eukaryota;Dinoflagellata;Dinophyceae;Peridiniphycidae_or;Thoracosphaeraceae;Thoracosphaeraceae_ge	12	5.45846e-05	Dinoflagellata	JN090875,DQ103862,AY121856,AY590483	0.954545,0.945455,0.945455,0.942424	NCBI Hits Summary
OTU642	Eukaryota;Stramenopiles;Chrysophyceae;	Eukaryota;SAR;Stramenopiles;Ochrophyta;Chrysophyceae;	Eukaryota;Ochrophyta_ph;Chrysophyceae;Chrysophyceae_unclassified;Chrysophyceae_unclassified;Chrysophyceae_unclassified	12	5.95468e-05	Chrysophyceae	MG674913,AB749105	0.966463,0.963415	NCBI Hits Summary
OTU692	Eukaryota;	Eukaryota;SAR;Alveolata;Dinoflagellata;Dinophyceae;	Eukaryota;Dinoflagellata;Dinophyceae;Dinophyceae_unclassified;Dinophyceae_unclassified;Dinophyceae_unclassified	12	7.93958e-05	Dinoflagellata	KC771146,FN557541,JN090875,AY590483	0.975758,0.966667,0.966667,0.966667	NCBI Hits Summary
OTU796	Eukaryota;environmental samples;	Eukaryota;SAR;Alveolata;	Eukaryota;Eukaryota_unclassified;Eukaryota_unclassified;Eukaryota_unclassified;Eukaryota_unclassified;Eukaryota_unclassified	12	5.45846e-05	Eukaryota_unclassified	KJ757950,KJ762691,KJ763108,KJ763359,KJ763031,KJ762932,KJ762908,KJ759639	0.942073,0.942073,0.939024,0.939024,0.939024,0.939024,0.939024,0.939024	NCBI Hits Summary
OTU344	Eukaryota;environmental samples;	Eukaryota;SAR;Alveolata;	Eukaryota;Dinoflagellata;Dinophyceae;Dinophyceae_unclassified;Dinophyceae_unclassified;Dinophyceae_unclassified	11	5.45846e-05	Dinoflagellata	KJ757950,KJ762691,KJ759469,GU819725,KJ763479,KJ757938,KJ758348	0.926282,0.926282,0.923077,0.923077,0.923077,0.923077,0.919872	NCBI Hits Summary
OTU345	Eukaryota;Stramenopiles;Bacillariophyta;Fragilariophyceae;Fragilariophycidae;Fragilariales;Fragilariaceae;	Eukaryota;SAR;Stramenopiles;Ochrophyta;Diatomea;Coscinodiscophytina;Fragilariales;Fragilaria;	Eukaryota;Diatomea;Coscinodiscophytina_cl;Fragilariales;Fragilariales_fa;Fragilariales_fa_unclassified	11	4.96224e-05	Bacillariophyceae	EF465478,AJ535137,EF465469,AM497738,AM497722,EF423405,AM497721	0.972308,0.972308,0.972308,0.972308,0.972308,0.969231,0.969231	NCBI Hits Summary
OTU347	Eukaryota;	Eukaryota;SAR;Alveolata;Dinoflagellata;Dinophyceae;	Eukaryota;Dinoflagellata;Dinophyceae;Dinophyceae_unclassified;Dinophyceae_unclassified;Dinophyceae_unclassified	11	5.95468e-05	Dinoflagellata	EF058253,KJ758039	0.963636,0.942424	NCBI Hits Summary
OTU352	Unclassified;	Eukaryota;SAR;Alveolata;Protalveolata;Perkinsidae;A31;	Eukaryota;Protalveolata;Perkinsidae;A31;A31_fa;A31_ge	11	1.98489e-05	Perkinsidae	EU162628	0.966049	NCBI Hits Summary
OTU354	Unclassified;	Unclassified;	Eukaryota;Dinoflagellata;Dinophyceae;Dinophyceae_unclassified;Dinophyceae_unclassified;Dinophyceae_unclassified	11	1.98489e-05	Dinoflagellata			NCBI Hits Summary
OTU355	Unclassified;	Unclassified;	Eukaryota;Eukaryota_unclassified;Eukaryota_unclassified;Eukaryota_unclassified;Eukaryota_unclassified;Eukaryota_unclassified	11	1.48867e-05	Eukaryota_unclassified			NCBI Hits Summary
OTU360	Unclassified;	Eukaryota;SAR;Stramenopiles;MAST-12;MAST-12C;	Eukaryota;MAST-12;MAST-12A;MAST-12A_or;MAST-12A_fa;MAST-12A_ge	11	3.47357e-05	MAST-12A	EU162644,EF023548,FPLS01035654,EF023211,EF219382	0.93994,0.93994,0.936937,0.936937,0.930931	NCBI Hits Summary
OTU364	Eukaryota;Fungi;	Eukaryota;Amorphea;Obazoa;Opisthokonta;Nucletmycea;Fungi;Chytridiomycota;Incertae Sedis;Chytridiomycetes;Chytridiales;Chytriomycetaceae;	Eukaryota;Chytridiomycota;Chytridiomycetes;Chytridiales;Chytriomycetaceae;Chytriomycetaceae_ge	11	2.97734e-05	Chytridiomycota	AY635825,MCGO01000014	0.945783,0.921687	NCBI Hits Summary
OTU366	Eukaryota;	Eukaryota;SAR;Stramenopiles;Ochrophyta;Dictyochophyceae;Pedinellales;	Eukaryota;Ochrophyta_ph;Dictyochophyceae;Pedinellales;Pedinellales_fa;Pedinellales_ge	11	1.98489e-05	Dictyochophyceae	GU068032,DQ647512,DQ647511,KP404878	0.942073,0.942073,0.935976,0.935976	NCBI Hits Summary
OTU373	Eukaryota;Fungi;Dikarya;Basidiomycota;Pucciniomycotina;Microbotryomycetes;	Eukaryota;Amorphea;Obazoa;Opisthokonta;Nucletmycea;Fungi;Dikarya;Basidiomycota;Pucciniomycotina;Microbotryomycetes;	Eukaryota;Basidiomycota;Microbotryomycetes;Leucosporidiales;Leucosporidiaceae;Leucosporidium	11	2.97734e-05	Basidiomycota	AB021697,X60181,AY707092,AB021694,AB021689	0.993976,0.990964,0.987952,0.987952,0.987952	NCBI Hits Summary
OTU378	Eukaryota;environmental samples;	Eukaryota;SAR;Alveolata;	Eukaryota;Dinoflagellata;Dinophyceae;Gymnodiniphycidae;Gymnodinium_clade;Gymnodinium_clade_unclassified	11	1.98489e-05	Dinoflagellata	EF526865,KJ758547,DQ103871,KJ758254,KJ757985,KJ757452,KJ759537,AF022196	0.945455,0.945455,0.945455,0.942424,0.942424,0.942424,0.942424,0.942424	NCBI Hits Summary
OTU396	Unclassified;	Unclassified;	Eukaryota;Eukaryota_unclassified;Eukaryota_unclassified;Eukaryota_unclassified;Eukaryota_unclassified;Eukaryota_unclassified	11	2.97734e-05	Eukaryota_unclassified			NCBI Hits Summary
OTU397	Eukaryota;	Eukaryota;SAR;Alveolata;	Eukaryota;Dinoflagellata;Dinophyceae;Dinophyceae_unclassified;Dinophyceae_unclassified;Dinophyceae_unclassified	11	3.96979e-05	Dinoflagellata	KC771146,KJ762730,KJ760672,KJ763426,KR535601,KJ763230,KJ758116	0.951515,0.939394,0.939394,0.939394,0.939394,0.939394,0.939394	NCBI Hits Summary
OTU414	Eukaryota;environmental samples;	Eukaryota;SAR;Alveolata;Dinoflagellata;Dinophyceae;	Eukaryota;Dinoflagellata;Dinophyceae;Dinophyceae_unclassified;Dinophyceae_unclassified;Dinophyceae_unclassified	11	2.48112e-05	Dinoflagellata	KJ758345,KJ758217,KJ757829,KJ762844,KJ757751,KJ758255,KJ763588	0.963636,0.960606,0.960606,0.960606,0.957576,0.957576,0.957576	NCBI Hits Summary
OTU424	Eukaryota;Stramenopiles;Bacillariophyta;Fragilariophyceae;Fragilariophycidae;	Eukaryota;SAR;Stramenopiles;Ochrophyta;Diatomea;Coscinodiscophytina;Fragilariales;Fragilaria;	Eukaryota;Diatomea;Coscinodiscophytina_cl;Fragilariales;Fragilariales_fa;Fragilariales_fa_unclassified	11	4.96224e-05	Bacillariophyceae	AM497722,AJ535137,EF465469,EF465478,AM497738,EF423405,AM497721	0.975535,0.975535,0.975535,0.975535,0.975535,0.972477,0.972477	NCBI Hits Summary
OTU462	Eukaryota;Stramenopiles;Bacillariophyta;Fragilariophyceae;Fragilariophycidae;	Eukaryota;SAR;Stramenopiles;Ochrophyta;Diatomea;Coscinodiscophytina;Fragilariales;Fragilaria;	Eukaryota;Diatomea;Diatomea_unclassified;Diatomea_unclassified;Diatomea_unclassified;Diatomea_unclassified	11	5.45846e-05	Bacillariophyceae	AM497738,AM497722,AJ535137,EF465478,EF465469,EF465492,EF423405	0.97561,0.97561,0.97561,0.97561,0.97561,0.972561,0.972561	NCBI Hits Summary
OTU656	Eukaryota;	Eukaryota;SAR;Alveolata;Ciliophora;Intramacronucleata;Spirotrichea;Choreotrichia;	Eukaryota;Ciliophora;Intramacronucleata;Spirotrichea;Choreotrichia;Tintinnidium	11	5.45846e-05	Ciliophora	EU162620,KX158727,KU715776	0.949843,0.924765,0.92163	NCBI Hits Summary
OTU800	Eukaryota;environmental samples;	Eukaryota;SAR;Alveolata;	Eukaryota;Dinoflagellata;Dinophyceae;Dinophyceae_unclassified;Dinophyceae_unclassified;Dinophyceae_unclassified	11	2.97734e-05	Dinoflagellata	KJ763230,KJ759690,KJ762965,KJ758116,KJ760672,KJ763426,JF791101,JF791103,KJ763731	0.963636,0.963636,0.963636,0.963636,0.963636,0.963636,0.963636,0.963636,0.963636	NCBI Hits Summary
OTU808	Eukaryota;	Eukaryota;SAR;Alveolata;Dinoflagellata;Dinophyceae;Peridiniphycidae;	Eukaryota;Dinoflagellata;Dinophyceae;Peridiniphycidae_or;Thoracosphaeraceae;Thoracosphaeraceae_ge	11	5.45846e-05	Dinoflagellata	JN090875,AY121856,AY251288,AY590483	0.969697,0.960606,0.960606,0.957576	NCBI Hits Summary
OTU843	Eukaryota;Stramenopiles;Oomycetes;	Eukaryota;SAR;Stramenopiles;Peronosporomycetes;	Eukaryota;Peronosporomycetes;Peronosporomycetes_cl;Peronosporomycetes_or;Peronosporomycetes_fa;Peronosporomycetes_fa_unclassified	11	2.97734e-05	Peronosporomycetes	AYTG01000691,AJ238662	0.96997,0.963964	NCBI Hits Summary
OTU899	Eukaryota;	Eukaryota;SAR;Alveolata;Dinoflagellata;Dinophyceae;	Eukaryota;Dinoflagellata;Dinophyceae;Dinophyceae_unclassified;Dinophyceae_unclassified;Dinophyceae_unclassified	11	2.48112e-05	Dinoflagellata	KJ758334,KJ757777,HG005135,KJ757816,KJ758152,KJ759378,KJ758203	0.972644,0.969605,0.969605,0.969605,0.969605,0.966565,0.966565	NCBI Hits Summary
OTU353	Eukaryota;Fungi;Dikarya;Ascomycota;Pezizomycotina;Dothideomycetes;Dothideomycetidae;	Eukaryota;Amorphea;Obazoa;Opisthokonta;Nucletmycea;Fungi;Dikarya;Ascomycota;Pezizomycotina;Dothideomycetes;	Eukaryota;Ascomycota;Dothideomycetes;Dothideales;Aureobasidiaceae;Columnosphaeria	10	4.46601e-05	Ascomycota	M55639,EU167576,EU167608	1,1,1	NCBI Hits Summary
OTU356	Eukaryota;Alveolata;Ciliophora;Intramacronucleata;Oligohymenophorea;Peritrichia;Sessilida;	Eukaryota;SAR;Alveolata;Ciliophora;Intramacronucleata;Conthreep;Oligohymenophorea;Peritrichia;	Eukaryota;Ciliophora;Intramacronucleata;Conthreep;Oligohymenophorea;Oligohymenophorea_unclassified	10	4.96224e-05	Ciliophora	KY675179,JN836352,KU870460,DQ662851	0.967532,0.964286,0.961039,0.961039	NCBI Hits Summary
OTU361	Eukaryota;	Eukaryota;Amorphea;Obazoa;Opisthokonta;Nucletmycea;Fungi;Chytridiomycota;Incertae Sedis;Chytridiomycetes;	Eukaryota;Chytridiomycota;Chytridiomycetes;Chytridiomycetes_unclassified;Chytridiomycetes_unclassified;Chytridiomycetes_unclassified	10	4.96224e-05	Chytridiomycota	AY642701	0.948485	NCBI Hits Summary
OTU363	unclassified sequences;metagenomes;	Eukaryota;SAR;Alveolata;Ciliophora;Intramacronucleata;Conthreep;Phyllopharyngea;Suctoria;	Eukaryota;Ciliophora;Intramacronucleata;Conthreep;Conthreep_unclassified;Conthreep_unclassified	10	4.46601e-05	Ciliophora			NCBI Hits Summary
OTU368	Eukaryota;Fungi;Fungi incertae sedis;Chytridiomycota;	Eukaryota;Amorphea;Obazoa;Opisthokonta;Nucletmycea;Fungi;Chytridiomycota;Incertae Sedis;Chytridiomycetes;	Eukaryota;Chytridiomycota;Chytridiomycetes;Chytridiomycetes_unclassified;Chytridiomycetes_unclassified;Chytridiomycetes_unclassified	10	4.46601e-05	Chytridiomycota	AY635823	0.936747	NCBI Hits Summary
OTU374	Eukaryota;Alveolata;Ciliophora;Intramacronucleata;	Eukaryota;SAR;Alveolata;Ciliophora;Intramacronucleata;Conthreep;Oligohymenophorea;Peniculia;	Eukaryota;Ciliophora;Intramacronucleata;Conthreep;Oligohymenophorea;Stokesia	10	2.48112e-05	Ciliophora	HM030738,AB725340,LN869925,KT461932	0.941718,0.935583,0.935583,0.935583	NCBI Hits Summary
OTU380	Unclassified;	Unclassified;	Eukaryota;Eukaryota_unclassified;Eukaryota_unclassified;Eukaryota_unclassified;Eukaryota_unclassified;Eukaryota_unclassified	10	2.97734e-05	Eukaryota_unclassified			NCBI Hits Summary
OTU390	Unclassified;	Eukaryota;SAR;Stramenopiles;MAST-12;MAST-12C;	Eukaryota;MAST-12;MAST-12A;MAST-12A_or;MAST-12A_fa;MAST-12A_ge	10	2.97734e-05	MAST-12A	FPLS01035654,EF219382,EF023548,EF219381	0.939577,0.939577,0.939577,0.936556	NCBI Hits Summary
OTU425	Eukaryota;Stramenopiles;Bacillariophyta;Coscinodiscophyceae;Coscinodiscophycidae;Aulacoseiraceae;Aulacoseira;	Eukaryota;SAR;Stramenopiles;Ochrophyta;Diatomea;Coscinodiscophytina;Melosirids;Aulacoseira;	Eukaryota;Diatomea;Coscinodiscophytina_cl;Coscinodiscophytina_or;Melosirids;Aulacoseira	10	5.45846e-05	Bacillariophyceae	AY121820	0.969697	NCBI Hits Summary
OTU491	Eukaryota;Stramenopiles;	Eukaryota;SAR;Stramenopiles;Ochrophyta;Chrysophyceae;	Eukaryota;Ochrophyta_ph;Chrysophyceae;Chrysophyceae_unclassified;Chrysophyceae_unclassified;Chrysophyceae_unclassified	10	5.45846e-05	Chrysophyceae	MG674913,FM955256,MG674905,EF527128,AF123293	0.932927,0.932927,0.929878,0.929878,0.926829	NCBI Hits Summary
OTU510	Eukaryota;	Eukaryota;SAR;Stramenopiles;Ochrophyta;Diatomea;Bacillariophytina;Bacillariophyceae;	Eukaryota;Diatomea;Bacillariophyceae;Bacillariophyceae_or;Bacillariophyceae_fa;Bacillariophyceae_fa_unclassified	10	2.97734e-05	Bacillariophyceae	KC771155,AM501966,KC771164,KC771191,KC771179,DQ310201,KC771171	0.972644,0.969605,0.969605,0.969605,0.966565,0.966565,0.966565	NCBI Hits Summary
OTU511	Eukaryota;	Eukaryota;Amorphea;Obazoa;Opisthokonta;Nucletmycea;Fungi;Cryptomycota;LKM11;	Eukaryota;Cryptomycota;LKM11_cl;LKM11_or;LKM11_fa;LKM11_ge	10	3.96979e-05	Cryptomycota	GU070875,LC109039,AB902187,AF372712,AB901773	0.981873,0.981873,0.981873,0.975831,0.975831	NCBI Hits Summary
OTU547	Eukaryota;Stramenopiles;Bacillariophyta;Fragilariophyceae;Fragilariophycidae;	Eukaryota;SAR;Stramenopiles;Ochrophyta;Diatomea;Coscinodiscophytina;Fragilariales;	Eukaryota;Diatomea;Coscinodiscophytina_cl;Fragilariales;Fragilariales_fa;Ulnaria	10	0.000114131	Bacillariophyceae	EF423422,EF465476	0.969419,0.969419	NCBI Hits Summary
OTU603	Eukaryota;	Eukaryota;SAR;Rhizaria;Cercozoa;Thecofilosea;	Eukaryota;Eukaryota_unclassified;Eukaryota_unclassified;Eukaryota_unclassified;Eukaryota_unclassified;Eukaryota_unclassified	10	2.97734e-05	Cercozoa	AB275046,DQ314810,GU821506,AB275050	0.921687,0.912651,0.909639,0.909639	NCBI Hits Summary
OTU868	Eukaryota;	Eukaryota;SAR;Alveolata;Dinoflagellata;Dinophyceae;	Eukaryota;Dinoflagellata;Dinoflagellata_unclassified;Dinoflagellata_unclassified;Dinoflagellata_unclassified;Dinoflagellata_unclassified	10	3.47357e-05	Dinoflagellata	KC771146,AB275019,KR535601,JF791103,JF791101,KJ763426,KJ760672	0.960606,0.951515,0.948485,0.948485,0.948485,0.948485,0.948485	NCBI Hits Summary
OTU885	Eukaryota;Stramenopiles;Bacillariophyta;Coscinodiscophyceae;Coscinodiscophycidae;Aulacoseiraceae;Aulacoseira;	Eukaryota;SAR;Stramenopiles;Ochrophyta;Diatomea;Coscinodiscophytina;Melosirids;Aulacoseira;	Eukaryota;Diatomea;Coscinodiscophytina_cl;Coscinodiscophytina_or;Melosirids;Aulacoseira	10	7.44336e-05	Bacillariophyceae	AY121820	0.963636	NCBI Hits Summary
OTU1098	Eukaryota;Stramenopiles;Bacillariophyta;Fragilariophyceae;Fragilariophycidae;	Eukaryota;SAR;Stramenopiles;Ochrophyta;Diatomea;Coscinodiscophytina;Fragilariales;Fragilaria;	Eukaryota;Diatomea;Coscinodiscophytina_cl;Fragilariales;Fragilariales_fa;Fragilariales_fa_unclassified	10	4.96224e-05	Bacillariophyceae	AM497738,AM497722,EF465478,AJ535137,EF465469,EF465492,AM497721	0.963303,0.963303,0.963303,0.963303,0.963303,0.960245,0.960245	NCBI Hits Summary
OTU1219	Eukaryota;	Eukaryota;SAR;Alveolata;	Eukaryota;Dinoflagellata;Dinophyceae;Dinophyceae_unclassified;Dinophyceae_unclassified;Dinophyceae_unclassified	10	6.45091e-05	Dinoflagellata	KC771146,JN090875,AY590483	0.957576,0.948485,0.948485	NCBI Hits Summary
OTU349	Eukaryota;Viridiplantae;Streptophyta;Embryophyta;Tracheophyta;Spermatophyta;Pinidae;Pinales;Pinaceae;Pinus;	Eukaryota;Archaeplastida;Chloroplastida;Charophyta;Phragmoplastophyta;Streptophyta;Embryophyta;Tracheophyta;Spermatophyta;Pinophyta;Pinales;Pinus;	Eukaryota;Phragmoplastophyta;Embryophyta;Pinophyta_or;Pinophyta_fa;Pinophyta_ge	9	4.96224e-05	Embryophyta	GFLL01048585,APFE030268033,APFE031454343,APFE031679979,APFE030118581,APFE030951981,APFE031333456	1,0.985119,0.985119,0.985119,0.982143,0.982143,0.982143	NCBI Hits Summary
OTU362	Eukaryota;Stramenopiles;Bacillariophyta;Fragilariophyceae;Fragilariophycidae;	Eukaryota;SAR;Stramenopiles;Ochrophyta;Diatomea;Coscinodiscophytina;Fragilariales;Fragilaria;	Eukaryota;Diatomea;Coscinodiscophytina_cl;Fragilariales;Fragilariales_fa;Fragilariales_fa_unclassified	9	3.47357e-05	Bacillariophyceae	EF465469,AM497738,EF465478,AM497722,AJ535137,AM497721,EF423405	0.960245,0.960245,0.960245,0.960245,0.960245,0.957187,0.957187	NCBI Hits Summary
OTU369	Eukaryota;environmental samples;	Eukaryota;SAR;Alveolata;	Eukaryota;Eukaryota_unclassified;Eukaryota_unclassified;Eukaryota_unclassified;Eukaryota_unclassified;Eukaryota_unclassified	9	3.96979e-05	Eukaryota_unclassified	KJ758503,KJ762321,KJ762416,KJ757950,KJ762900,KJ763359,KJ763108,HM581708	0.929878,0.920732,0.920732,0.920732,0.920732,0.920732,0.920732,0.920732	NCBI Hits Summary
OTU381	Eukaryota;Stramenopiles;Oomycetes;Saprolegniales;Saprolegniaceae;	Eukaryota;SAR;Stramenopiles;Peronosporomycetes;	Eukaryota;Peronosporomycetes;Peronosporomycetes_cl;Peronosporomycetes_or;Peronosporomycetes_fa;Peronosporomycetes_ge	9	3.96979e-05	Peronosporomycetes	AJ238658,AJ238662,JNBR01001696,AJ238656,AB175931	0.972973,0.972973,0.972973,0.966967,0.963964	NCBI Hits Summary
OTU383	Eukaryota;	Eukaryota;SAR;Alveolata;	Eukaryota;Eukaryota_unclassified;Eukaryota_unclassified;Eukaryota_unclassified;Eukaryota_unclassified;Eukaryota_unclassified	9	3.47357e-05	Eukaryota_unclassified	KC771146,KJ763656,HM066998,KJ763064,LC054949,KJ757885,KJ760672	0.947692,0.947692,0.941538,0.941538,0.941538,0.938462,0.938462	NCBI Hits Summary
OTU384	Eukaryota;Stramenopiles;Bacillariophyta;Coscinodiscophyceae;Coscinodiscophycidae;Aulacoseiraceae;Aulacoseira;	Eukaryota;SAR;Stramenopiles;Ochrophyta;Diatomea;Coscinodiscophytina;Melosirids;Aulacoseira;	Eukaryota;Diatomea;Coscinodiscophytina_cl;Coscinodiscophytina_or;Melosirids;Aulacoseira	9	6.94713e-05	Bacillariophyceae	AY121820	0.963636	NCBI Hits Summary
OTU388	Eukaryota;environmental samples;	Eukaryota;SAR;Alveolata;	Eukaryota;Dinoflagellata;Dinophyceae;Gymnodiniphycidae;Gymnodinium_clade;Gymnodinium_clade_unclassified	9	1.48867e-05	Dinoflagellata	KJ758547,DQ103871,KJ758214,DQ103860,KJ759537,KJ759489,AF022196,KJ757985	0.960606,0.960606,0.957576,0.957576,0.957576,0.957576,0.957576,0.957576	NCBI Hits Summary
OTU391	Unclassified;	Eukaryota;Amorphea;Amoebozoa;SAR;Stramenopiles;Labyrinthulomycetes;Sorodiplophrys;	Eukaryota;Eukaryota_unclassified;Eukaryota_unclassified;Eukaryota_unclassified;Eukaryota_unclassified;Eukaryota_unclassified	9	3.96979e-05	Eukaryota_unclassified	FPLS01016464	0.909639	NCBI Hits Summary
OTU399	Eukaryota;Rhizaria;Cercozoa;environmental samples;	Eukaryota;SAR;Rhizaria;Cercozoa;Novel Clade 2;	Eukaryota;Eukaryota_unclassified;Eukaryota_unclassified;Eukaryota_unclassified;Eukaryota_unclassified;Eukaryota_unclassified	9	3.96979e-05	Cercozoa			NCBI Hits Summary
OTU402	Eukaryota;Stramenopiles;	Eukaryota;SAR;Stramenopiles;Ochrophyta;Chrysophyceae;	Eukaryota;Ochrophyta_ph;Chrysophyceae;Chrysophyceae_unclassified;Chrysophyceae_unclassified;Chrysophyceae_unclassified	9	4.96224e-05	Chrysophyceae	MG674913,AY651092,AB749134	0.945122,0.935976,0.935976	NCBI Hits Summary
OTU404	Unclassified;	Unclassified;	Eukaryota;Eukaryota_unclassified;Eukaryota_unclassified;Eukaryota_unclassified;Eukaryota_unclassified;Eukaryota_unclassified	9	2.48112e-05	Eukaryota_unclassified			NCBI Hits Summary
OTU407	Eukaryota;	Eukaryota;SAR;Alveolata;	Eukaryota;Dinoflagellata;Dinophyceae;Dinophyceae_unclassified;Dinophyceae_unclassified;Dinophyceae_unclassified	9	2.48112e-05	Dinoflagellata	KC771146,AY251288	0.969419,0.960245	NCBI Hits Summary
OTU409	Eukaryota;	Eukaryota;SAR;Alveolata;Dinoflagellata;Dinophyceae;	Eukaryota;Dinoflagellata;Dinoflagellata_unclassified;Dinoflagellata_unclassified;Dinoflagellata_unclassified;Dinoflagellata_unclassified	9	1.98489e-05	Dinoflagellata	KC771146	0.910596	NCBI Hits Summary
OTU444	Eukaryota;	Eukaryota;Cryptophyceae;Cryptomonadales;	Eukaryota;Eukaryota_unclassified;Eukaryota_unclassified;Eukaryota_unclassified;Eukaryota_unclassified;Eukaryota_unclassified	9	2.97734e-05	Cryptophyceae	JX840940,U53123	0.978788,0.939394	NCBI Hits Summary
OTU490	Eukaryota;Stramenopiles;Bacillariophyta;Fragilariophyceae;Fragilariophycidae;	Eukaryota;SAR;Stramenopiles;Ochrophyta;Diatomea;Coscinodiscophytina;Fragilariales;Fragilaria;	Eukaryota;Diatomea;Coscinodiscophytina_cl;Fragilariales;Fragilariales_fa;Fragilariales_fa_unclassified	9	3.96979e-05	Bacillariophyceae	AM497722,AJ535137,EF465469,EF465478,AM497738,EF423405,AM497721	0.966463,0.966463,0.966463,0.966463,0.966463,0.963415,0.963415	NCBI Hits Summary
OTU513	Unclassified;	Eukaryota;Amorphea;Amoebozoa;SAR;Stramenopiles;Labyrinthulomycetes;Sorodiplophrys;	Eukaryota;Eukaryota_unclassified;Eukaryota_unclassified;Eukaryota_unclassified;Eukaryota_unclassified;Eukaryota_unclassified	9	2.48112e-05	Eukaryota_unclassified	FPLS01016464,DQ104602	0.928144,0.901198	NCBI Hits Summary
OTU543	Eukaryota;	Eukaryota;SAR;Alveolata;Dinoflagellata;Dinophyceae;	Eukaryota;Dinoflagellata;Dinophyceae;Dinophyceae_unclassified;Dinophyceae_unclassified;Dinophyceae_unclassified	9	3.47357e-05	Dinoflagellata	FN557541,AY251288,KC771146	0.966667,0.963636,0.963636	NCBI Hits Summary
OTU559	Eukaryota;environmental samples;	Eukaryota;SAR;Alveolata;	Eukaryota;Eukaryota_unclassified;Eukaryota_unclassified;Eukaryota_unclassified;Eukaryota_unclassified;Eukaryota_unclassified	9	4.46601e-05	Eukaryota_unclassified	KJ758503,KJ757950,KJ762691,KJ762321,KJ763359,KJ759500,KJ763108,HM581708	0.939024,0.929878,0.929878,0.929878,0.929878,0.929878,0.929878,0.929878	NCBI Hits Summary
OTU563	Unclassified;	Eukaryota;Amorphea;Amoebozoa;SAR;Stramenopiles;Labyrinthulomycetes;Sorodiplophrys;	Eukaryota;Eukaryota_unclassified;Eukaryota_unclassified;Eukaryota_unclassified;Eukaryota_unclassified;Eukaryota_unclassified	9	3.96979e-05	Eukaryota_unclassified	EF023442,FPLS01016464	0.916168,0.916168	NCBI Hits Summary
OTU611	Eukaryota;	Eukaryota;SAR;Alveolata;	Eukaryota;Dinoflagellata;Dinophyceae;Dinophyceae_unclassified;Dinophyceae_unclassified;Dinophyceae_unclassified	9	2.48112e-05	Dinoflagellata	KC771146,AY251288,DQ103862	0.978593,0.972477,0.972477	NCBI Hits Summary
OTU662	Eukaryota;	Eukaryota;SAR;Stramenopiles;Ochrophyta;Diatomea;Bacillariophytina;Bacillariophyceae;	Eukaryota;Diatomea;Bacillariophyceae;Bacillariophyceae_or;Bacillariophyceae_fa;Bacillariophyceae_fa_unclassified	9	2.48112e-05	Bacillariophyceae	AM497725,EF465465,AY633758,HM805036,KJ760614,AY485457,EF423403	0.972561,0.972561,0.969512,0.969512,0.966463,0.966463,0.966463	NCBI Hits Summary
OTU686	Eukaryota;Stramenopiles;Bacillariophyta;Bacillariophyceae;Bacillariophycidae;Naviculales;	Eukaryota;SAR;Stramenopiles;Ochrophyta;Diatomea;Bacillariophytina;Bacillariophyceae;Sellaphoraceae;	Eukaryota;Diatomea;Bacillariophyceae;Bacillariophyceae_or;Bacillariophyceae_fa;Bacillariophyceae_fa_unclassified	9	2.48112e-05	Bacillariophyceae	EF151962,KJ961708,KJ961711,KJ961680,AJ544654,AJ243063,EF151984	0.975535,0.975535,0.975535,0.972477,0.969419,0.969419,0.969419	NCBI Hits Summary
OTU704	Eukaryota;environmental samples;	Eukaryota;SAR;Alveolata;	Eukaryota;Dinoflagellata;Dinophyceae;Gymnodiniphycidae;Gymnodinium_clade;Gymnodinium_clade_ge	9	1.98489e-05	Dinoflagellata	DQ103871,KJ758547,AF022196,KJ758254,KJ758214,KJ759537,KJ759489,DQ103860	0.951515,0.951515,0.948485,0.948485,0.948485,0.948485,0.948485,0.948485	NCBI Hits Summary
OTU886	Unclassified;	Unclassified;	Eukaryota;Eukaryota_unclassified;Eukaryota_unclassified;Eukaryota_unclassified;Eukaryota_unclassified;Eukaryota_unclassified	9	8.4358e-05	Eukaryota_unclassified			NCBI Hits Summary
OTU1076	Eukaryota;	Eukaryota;SAR;Alveolata;Ciliophora;Intramacronucleata;Conthreep;Prostomatea;Cryptocaryon;	Eukaryota;Ciliophora;Intramacronucleata;Conthreep;Prostomatea;Prostomatea_unclassified	9	4.46601e-05	Ciliophora	KJ761752	0.943574	NCBI Hits Summary
OTU1108	Eukaryota;Stramenopiles;Bacillariophyta;Fragilariophyceae;Fragilariophycidae;	Eukaryota;SAR;Stramenopiles;Ochrophyta;Diatomea;Coscinodiscophytina;Fragilariales;	Eukaryota;Diatomea;Coscinodiscophytina_cl;Fragilariales;Fragilariales_fa;Fragilariales_fa_unclassified	9	3.47357e-05	Bacillariophyceae	EF491890,AY485505,EF465470,EF465490,EF465488,EF423414,EF423417	0.966667,0.966667,0.963636,0.963636,0.963636,0.960606,0.960606	NCBI Hits Summary
OTU348	Unclassified;	Eukaryota;SAR;Stramenopiles;Ochrophyta;Chrysophyceae;	Eukaryota;Ochrophyta_ph;Chrysophyceae;Chrysophyceae_unclassified;Chrysophyceae_unclassified;Chrysophyceae_unclassified	8	3.96979e-05	Chrysophyceae	AB749076	0.960245	NCBI Hits Summary
OTU367	Eukaryota;Fungi;environmental samples;	Eukaryota;Amorphea;Obazoa;Opisthokonta;Nucletmycea;Fungi;Cryptomycota;LKM11;	Eukaryota;Eukaryota_unclassified;Eukaryota_unclassified;Eukaryota_unclassified;Eukaryota_unclassified;Eukaryota_unclassified	8	1.98489e-05	Cryptomycota			NCBI Hits Summary
OTU408	Eukaryota;	Eukaryota;SAR;Stramenopiles;Ochrophyta;Diatomea;	Eukaryota;Diatomea;Coscinodiscophytina_cl;Coscinodiscophytina_or;Melosirids;Aulacoseira	8	3.96979e-05	Bacillariophyceae	AY121820	0.948485	NCBI Hits Summary
OTU416	Eukaryota;environmental samples;	Eukaryota;SAR;Alveolata;Dinoflagellata;Dinophyceae;	Eukaryota;Eukaryota_unclassified;Eukaryota_unclassified;Eukaryota_unclassified;Eukaryota_unclassified;Eukaryota_unclassified	8	1.48867e-05	Dinoflagellata	KC771146,KJ763731,KJ758125,KJ758361,KJ757823,KJ763426,KJ757940	0.945455,0.939394,0.939394,0.939394,0.939394,0.939394,0.939394	NCBI Hits Summary
OTU417	Unclassified;	Eukaryota;SAR;Alveolata;Ciliophora;Intramacronucleata;Spirotrichea;Euplotia;Aspidisca;	Eukaryota;Ciliophora;Intramacronucleata;Spirotrichea;Euplotia;Aspidisca	8	3.47357e-05	Ciliophora	FPLP01011942,FPLP01005792	0.983766,0.970779	NCBI Hits Summary
OTU418	Eukaryota;	Eukaryota;SAR;Stramenopiles;Ochrophyta;Chrysophyceae;	Eukaryota;Ochrophyta_ph;Chrysophyceae;Chrysophyceae_unclassified;Chrysophyceae_unclassified;Chrysophyceae_unclassified	8	2.97734e-05	Chrysophyceae	EF165132,KP404840,HAFT01000499	0.954128,0.93578,0.93578	NCBI Hits Summary
OTU419	Unclassified;	Eukaryota;Amorphea;Obazoa;Opisthokonta;Nucletmycea;Fungi;Dikarya;Ascomycota;Pezizomycotina;	Eukaryota;Ascomycota;Leotiomycetes;Helotiales;Incertae_Sedis;Tetracladium	8	1.98489e-05	Ascomycota	AF388575	0.996979	NCBI Hits Summary
OTU421	Eukaryota;Stramenopiles;Oomycetes;	Eukaryota;SAR;Stramenopiles;Peronosporomycetes;	Eukaryota;Peronosporomycetes;Peronosporomycetes_cl;Peronosporomycetes_or;Peronosporomycetes_fa;Peronosporomycetes_fa_unclassified	8	1.98489e-05	Peronosporomycetes	AJ238658,AJ238656,AJ238662,JNBR01001696,M32705	0.963855,0.963855,0.963855,0.963855,0.963855	NCBI Hits Summary
OTU426	Eukaryota;environmental samples;	Eukaryota;SAR;Alveolata;	Eukaryota;Dinoflagellata;Dinophyceae;Dinophyceae_unclassified;Dinophyceae_unclassified;Dinophyceae_unclassified	8	3.96979e-05	Dinoflagellata	KJ762691,KJ759639,KJ762900,KJ759500,KJ757950,KJ763031,KJ762932,KJ762908,KJ763108	0.955696,0.955696,0.955696,0.955696,0.955696,0.955696,0.955696,0.955696,0.955696	NCBI Hits Summary
OTU427	Unclassified;	Eukaryota;Amorphea;Obazoa;Opisthokonta;Holozoa;Choanozoa;Choanoflagellata;Choanoflagellida;Craspedida;	Eukaryota;Holozoa_ph;Choanoflagellida;Choanoflagellida_unclassified;Choanoflagellida_unclassified;Choanoflagellida_unclassified	8	1.98489e-05	Holozoa	FPLS01000278	0.933535	NCBI Hits Summary
OTU431	Eukaryota;	Eukaryota;Amorphea;Obazoa;Opisthokonta;Nucletmycea;Fungi;Chytridiomycota;Incertae Sedis;Chytridiomycetes;	Eukaryota;Chytridiomycota;Chytridiomycetes;Chytridiomycetes_unclassified;Chytridiomycetes_unclassified;Chytridiomycetes_unclassified	8	4.96224e-05	Chytridiomycota	AB695513,GQ995332	0.945783,0.933735	NCBI Hits Summary
OTU432	Eukaryota;Stramenopiles;Synurophyceae;Synurales;Mallomonadaceae;	Eukaryota;SAR;Stramenopiles;Ochrophyta;Chrysophyceae;Synurales;	Eukaryota;Ochrophyta_ph;Chrysophyceae;Synurales;Synurales_fa;Mallomonas	8	2.48112e-05	Chrysophyceae	U73232,M55285,DQ487199	0.951219,0.945122,0.945122	NCBI Hits Summary
OTU434	Eukaryota;Alveolata;Ciliophora;Intramacronucleata;Oligohymenophorea;Hymenostomatida;	Eukaryota;SAR;Alveolata;Ciliophora;Intramacronucleata;Conthreep;Oligohymenophorea;Hymenostomatia;	Eukaryota;Ciliophora;Intramacronucleata;Conthreep;Oligohymenophorea;Hymenostomatia_ge	8	2.48112e-05	Ciliophora	U17355,HE820726	0.996805,0.948882	NCBI Hits Summary
OTU435	Unclassified;	Eukaryota;Amorphea;Amoebozoa;SAR;Stramenopiles;Labyrinthulomycetes;Sorodiplophrys;	Eukaryota;Eukaryota_unclassified;Eukaryota_unclassified;Eukaryota_unclassified;Eukaryota_unclassified;Eukaryota_unclassified	8	2.97734e-05	Eukaryota_unclassified	FPLS01016464	0.92515	NCBI Hits Summary
OTU436	Unclassified;	Eukaryota;Amorphea;Obazoa;Opisthokonta;Nucletmycea;Fungi;Dikarya;Ascomycota;Saccharomycotina;Saccharomycetes;Saccharomycetales;Debaryomycetaceae;Kurtzmaniella-Candida clade;	Eukaryota;Ascomycota;Saccharomycetes;Saccharomycetales;Debaryomycetaceae;Debaryomycetaceae_unclassified	8	1.98489e-05	Ascomycota	GZ486162,AB013536,AB013562,AB013546,AB013534,AB013553,AB013555,AB013509	0.987952,0.98494,0.98494,0.98494,0.98494,0.98494,0.98494,0.98494	NCBI Hits Summary
OTU437	Eukaryota;Fungi;	Eukaryota;Amorphea;Obazoa;Opisthokonta;Nucletmycea;Fungi;Dikarya;Ascomycota;Pezizomycotina;Dothideomycetes;Pleosporales;	Eukaryota;Ascomycota;Dothideomycetes;Pleosporales;Cucurbitariaceae;uncultured	8	1.98489e-05	Ascomycota	KU981162,AB303548,EU167563,BD493748,U42480,U42482,KC670881,EU167561	0.981982,0.981982,0.981982,0.981982,0.981982,0.978979,0.978979,0.978979	NCBI Hits Summary
OTU438	Eukaryota;Alveolata;	Eukaryota;SAR;Alveolata;Ciliophora;Intramacronucleata;Spirotrichea;Hypotrichia;	Eukaryota;Ciliophora;Intramacronucleata;Spirotrichea;Hypotrichia;Hypotrichia_unclassified	8	3.96979e-05	Ciliophora	DQ244036,DQ244039,FPLS01060944,AF508769,DQ490236	0.943218,0.943218,0.933754,0.930599,0.930599	NCBI Hits Summary
OTU439	Eukaryota;Fungi;Dikarya;Ascomycota;Pezizomycotina;Lecanoromycetes;OSLEUM clade;Lecanoromycetidae;	Eukaryota;Amorphea;Obazoa;Opisthokonta;Nucletmycea;Fungi;Dikarya;Ascomycota;Pezizomycotina;Lecanoromycetes;	Eukaryota;Ascomycota;Lecanoromycetes;Lecanoromycetes_unclassified;Lecanoromycetes_unclassified;Lecanoromycetes_unclassified	8	3.96979e-05	Ascomycota	AY456685,AB205379,KY098775,KY033353,AF140236,MG262488,AF450289	0.981982,0.975976,0.975976,0.975976,0.975976,0.975976,0.975976	NCBI Hits Summary
OTU440	Eukaryota;	Eukaryota;SAR;Alveolata;	Eukaryota;Dinoflagellata;Dinophyceae;Dinophyceae_unclassified;Dinophyceae_unclassified;Dinophyceae_unclassified	8	1.48867e-05	Dinoflagellata	KC771146,AY251288	0.940063,0.927445	NCBI Hits Summary
OTU442	Unclassified;	Unclassified;	Eukaryota;Eukaryota_unclassified;Eukaryota_unclassified;Eukaryota_unclassified;Eukaryota_unclassified;Eukaryota_unclassified	8	1.48867e-05	Eukaryota_unclassified			NCBI Hits Summary
OTU446	Eukaryota;environmental samples;	Eukaryota;SAR;Alveolata;Dinoflagellata;Dinophyceae;	Eukaryota;Dinoflagellata;Dinophyceae;Dinophyceae_unclassified;Dinophyceae_unclassified;Dinophyceae_unclassified	8	2.48112e-05	Dinoflagellata	KC771146,KJ763230,KJ759690,KJ758116,KJ763731,JF791103,KJ760672,JF791101	0.980066,0.976744,0.976744,0.976744,0.976744,0.976744,0.976744,0.976744	NCBI Hits Summary
OTU448	Eukaryota;	Eukaryota;SAR;Alveolata;Dinoflagellata;Dinophyceae;	Eukaryota;Dinoflagellata;Dinophyceae;Dinophyceae_unclassified;Dinophyceae_unclassified;Dinophyceae_unclassified	8	1.48867e-05	Dinoflagellata	KC771146,FN557541,DQ103862,KJ760672,KJ764445,KR535601,KJ764251	0.980198,0.970297,0.970297,0.966997,0.966997,0.966997,0.966997	NCBI Hits Summary
OTU450	Eukaryota;	Eukaryota;SAR;Alveolata;	Eukaryota;Eukaryota_unclassified;Eukaryota_unclassified;Eukaryota_unclassified;Eukaryota_unclassified;Eukaryota_unclassified	8	1.48867e-05	Eukaryota_unclassified	KC771146,KJ757402,KR535601,KJ760672,KJ762730,KJ758116,KJ763731	0.951515,0.945455,0.945455,0.942424,0.942424,0.942424,0.942424	NCBI Hits Summary
OTU454	Eukaryota;environmental samples;	Eukaryota;SAR;Alveolata;	Eukaryota;Dinoflagellata;Dinophyceae;Dinophyceae_unclassified;Dinophyceae_unclassified;Dinophyceae_unclassified	8	2.48112e-05	Dinoflagellata	KC771146,KJ763230,KJ759690,KJ758116,KJ763426,KJ760672,KJ758167,KJ763731	0.954545,0.948485,0.948485,0.948485,0.948485,0.948485,0.948485,0.948485	NCBI Hits Summary
OTU474	Eukaryota;	Eukaryota;SAR;Stramenopiles;Ochrophyta;Chrysophyceae;	Eukaryota;Ochrophyta_ph;Chrysophyceae;Chrysophyceae_unclassified;Chrysophyceae_unclassified;Chrysophyceae_unclassified	8	3.96979e-05	Chrysophyceae	EF527128,MG674913	0.942073,0.935976	NCBI Hits Summary
OTU494	Unclassified;	Eukaryota;SAR;Stramenopiles;Ochrophyta;Chrysophyceae;	Eukaryota;Ochrophyta_ph;Chrysophyceae;Ochromonadales;Ochromonadales_fa;Ochromonadales_fa_unclassified	8	8.93203e-05	Chrysophyceae	AF123289,HAGC01014360,HAFT01000499,EF165125,GU290089,FPLS01038393	0.969512,0.942073,0.939024,0.939024,0.939024,0.939024	NCBI Hits Summary
OTU530	Eukaryota;	Eukaryota;SAR;Alveolata;Dinoflagellata;Dinophyceae;	Eukaryota;Dinoflagellata;Dinophyceae;Dinophyceae_unclassified;Dinophyceae_unclassified;Dinophyceae_unclassified	8	1.48867e-05	Dinoflagellata	KC771146,FN557541,KJ763731,JF791101,KJ764209,KJ763426,LC054949	0.984177,0.974684,0.971519,0.971519,0.971519,0.971519,0.971519	NCBI Hits Summary
OTU618	Eukaryota;	Eukaryota;SAR;Alveolata;Dinoflagellata;Dinophyceae;	Eukaryota;Dinoflagellata;Dinophyceae;Peridiniphycidae_or;Thoracosphaeraceae;Thoracosphaeraceae_unclassified	8	1.98489e-05	Dinoflagellata	DQ103862,JN090875,AY121856,LK934662	0.966667,0.963636,0.960606,0.960606	NCBI Hits Summary
OTU654	Eukaryota;environmental samples;	Eukaryota;SAR;Alveolata;	Eukaryota;Eukaryota_unclassified;Eukaryota_unclassified;Eukaryota_unclassified;Eukaryota_unclassified;Eukaryota_unclassified	8	3.96979e-05	Eukaryota_unclassified	KJ762691,KJ757950,KJ763359,KJ762416,KJ762908,KJ759266,KJ759500,HM581708	0.935976,0.935976,0.932927,0.932927,0.932927,0.932927,0.932927,0.932927	NCBI Hits Summary
OTU671	Eukaryota;	Eukaryota;SAR;Stramenopiles;Ochrophyta;Diatomea;	Eukaryota;Diatomea;Diatomea_unclassified;Diatomea_unclassified;Diatomea_unclassified;Diatomea_unclassified	8	1.98489e-05	Bacillariophyceae	AY633758,EF465465,AM497725,AF525661	0.972561,0.969512,0.963415,0.963415	NCBI Hits Summary
OTU691	Eukaryota;	Eukaryota;SAR;Alveolata;	Eukaryota;Dinoflagellata;Dinophyceae;Dinophyceae_unclassified;Dinophyceae_unclassified;Dinophyceae_unclassified	8	1.98489e-05	Dinoflagellata	KC771146,AY251288,EF492511,KR535601,KJ757982,EU371138,HM581709	0.969325,0.957055,0.957055,0.957055,0.957055,0.957055,0.957055	NCBI Hits Summary
OTU828	Eukaryota;Stramenopiles;	Eukaryota;SAR;Stramenopiles;Ochrophyta;Diatomea;Bacillariophytina;Mediophyceae;Thalassiosira;	Eukaryota;Diatomea;Diatomea_unclassified;Diatomea_unclassified;Diatomea_unclassified;Diatomea_unclassified	8	1.98489e-05	Bacillariophyceae	AB831890,DQ093366,GQ148713,DQ093369,KT347147,JQ782059,KJ757921	0.957317,0.954268,0.954268,0.951219,0.951219,0.951219,0.951219	NCBI Hits Summary
OTU887	Eukaryota;environmental samples;	Eukaryota;SAR;Alveolata;	Eukaryota;Dinoflagellata;Dinoflagellata_unclassified;Dinoflagellata_unclassified;Dinoflagellata_unclassified;Dinoflagellata_unclassified	8	3.47357e-05	Dinoflagellata	KJ757982,KJ763230,KJ759690,KJ758116,KJ763426,KJ760672,KJ758167,KJ763731	0.966667,0.963636,0.963636,0.963636,0.963636,0.963636,0.963636,0.963636	NCBI Hits Summary
OTU920	Eukaryota;	Eukaryota;SAR;Stramenopiles;Ochrophyta;Chrysophyceae;	Eukaryota;Ochrophyta_ph;Chrysophyceae;Chrysophyceae_unclassified;Chrysophyceae_unclassified;Chrysophyceae_unclassified	8	6.94713e-05	Chrysophyceae	AB749076,EF185316,AY651071	0.926829,0.926829,0.911585	NCBI Hits Summary
OTU987	Unclassified;	Eukaryota;SAR;Stramenopiles;Ochrophyta;Chrysophyceae;	Eukaryota;Ochrophyta_ph;Chrysophyceae;Chrysophyceae_unclassified;Chrysophyceae_unclassified;Chrysophyceae_unclassified	8	3.96979e-05	Chrysophyceae	EF165134	0.966463	NCBI Hits Summary
OTU1136	Eukaryota;	Eukaryota;SAR;Stramenopiles;Ochrophyta;Diatomea;	Eukaryota;Diatomea;Diatomea_unclassified;Diatomea_unclassified;Diatomea_unclassified;Diatomea_unclassified	8	1.98489e-05	Bacillariophyceae	EF465465	0.966361	NCBI Hits Summary
OTU1216	Eukaryota;	Eukaryota;SAR;Alveolata;	Eukaryota;Eukaryota_unclassified;Eukaryota_unclassified;Eukaryota_unclassified;Eukaryota_unclassified;Eukaryota_unclassified	8	1.98489e-05	Eukaryota_unclassified	KJ757832	0.912121	NCBI Hits Summary
OTU453	Eukaryota;	Eukaryota;SAR;Alveolata;Ciliophora;Intramacronucleata;Spirotrichea;Hypotrichia;	Eukaryota;Ciliophora;Intramacronucleata;Spirotrichea;Hypotrichia;Holosticha	7	2.97734e-05	Ciliophora	DQ059583,FJ775717,DQ059582	0.943038,0.943038,0.93038	NCBI Hits Summary
OTU456	Eukaryota;Stramenopiles;Bacillariophyta;Fragilariophyceae;Fragilariophycidae;	Eukaryota;SAR;Stramenopiles;Ochrophyta;Diatomea;Coscinodiscophytina;Fragilariales;	Eukaryota;Diatomea;Coscinodiscophytina_cl;Fragilariales;Fragilariales_fa;Ulnaria	7	7.93958e-05	Bacillariophyceae	EF423422,EF465476	0.923547,0.923547	NCBI Hits Summary
OTU457	Eukaryota;Alveolata;	Eukaryota;SAR;Alveolata;Ciliophora;Intramacronucleata;Spirotrichea;Choreotrichia;	Eukaryota;Ciliophora;Intramacronucleata;Spirotrichea;Choreotrichia;Tintinnidium	7	3.47357e-05	Ciliophora	EU162620	0.956113	NCBI Hits Summary
OTU458	Eukaryota;Stramenopiles;Bacillariophyta;Coscinodiscophyceae;Coscinodiscophycidae;Aulacoseiraceae;Aulacoseira;	Eukaryota;SAR;Stramenopiles;Ochrophyta;Diatomea;Coscinodiscophytina;Melosirids;Aulacoseira;	Eukaryota;Diatomea;Coscinodiscophytina_cl;Coscinodiscophytina_or;Melosirids;Aulacoseira	7	4.46601e-05	Bacillariophyceae	AY121820	0.966667	NCBI Hits Summary
OTU459	Eukaryota;Alveolata;Ciliophora;Intramacronucleata;Oligohymenophorea;Peritrichia;Sessilida;	Eukaryota;SAR;Alveolata;Ciliophora;Intramacronucleata;Conthreep;Oligohymenophorea;Peritrichia;	Eukaryota;Ciliophora;Intramacronucleata;Conthreep;Oligohymenophorea;Oligohymenophorea_unclassified	7	3.96979e-05	Ciliophora	JX869064,AF401522,AF401526,KF141789,DQ487201,HM852991,KX465164	0.948052,0.948052,0.948052,0.948052,0.941558,0.941558,0.941558	NCBI Hits Summary
OTU471	Eukaryota;Viridiplantae;	Eukaryota;Archaeplastida;Chloroplastida;	Eukaryota;Chlorophyta_ph;Chlorophyceae;Chlorophyceae_or;Chlorophyceae_fa;Chlorophyceae_ge	7	3.96979e-05	Chlorophyta	FJ946899,KY816917,KT388089,EF023591,EF023339,GQ375104,LWCB01008357	0.98471,0.978593,0.978593,0.975535,0.975535,0.975535,0.975535	NCBI Hits Summary
OTU473	Eukaryota;Fungi;Fungi incertae sedis;Chytridiomycota;	Eukaryota;Amorphea;Obazoa;Opisthokonta;Nucletmycea;Fungi;Chytridiomycota;Incertae Sedis;Chytridiomycetes;	Eukaryota;Chytridiomycota;Chytridiomycetes;Chytridiomycetes_unclassified;Chytridiomycetes_unclassified;Chytridiomycetes_unclassified	7	1.98489e-05	Chytridiomycota	HQ219419	0.933934	NCBI Hits Summary
OTU475	Eukaryota;Viridiplantae;Chlorophyta;Chlorophyceae;Chlamydomonadales;	Eukaryota;Archaeplastida;Chloroplastida;Chlorophyta;Chlorophyceae;Chlamydomonadales;	Eukaryota;Chlorophyta_ph;Chlorophyta_ph_unclassified;Chlorophyta_ph_unclassified;Chlorophyta_ph_unclassified;Chlorophyta_ph_unclassified	7	1.98489e-05	Chlorophyta	KM020018,FR865535,KM020017,AY731083,FR854385	0.963415,0.948171,0.948171,0.945122,0.945122	NCBI Hits Summary
OTU476	Eukaryota;Fungi;Dikarya;Ascomycota;Pezizomycotina;Leotiomycetes;	Eukaryota;Amorphea;Obazoa;Opisthokonta;Nucletmycea;Fungi;Dikarya;Ascomycota;Pezizomycotina;Leotiomycetes;	Eukaryota;Ascomycota;Leotiomycetes;Helotiales;Helotiales_fa;Helotiales_ge	7	1.98489e-05	Ascomycota	U45445,AY762619,AY838785	1,0.98494,0.98494	NCBI Hits Summary
OTU477	Eukaryota;	Eukaryota;SAR;Alveolata;	Eukaryota;Dinoflagellata;Dinophyceae;Peridiniphycidae_or;Thoracosphaeraceae;Thoracosphaeraceae_unclassified	7	1.98489e-05	Dinoflagellata	KC771146,LC054949	0.960606,0.954545	NCBI Hits Summary
OTU480	Eukaryota;	Eukaryota;SAR;Alveolata;	Eukaryota;Dinoflagellata;Dinophyceae;Peridiniphycidae_or;Thoracosphaeraceae;Thoracosphaeraceae_unclassified	7	1.48867e-05	Dinoflagellata	KC771146,KJ760672,KJ763426,KJ763731,KR535601,KJ762730,KJ762965	0.984424,0.971963,0.971963,0.971963,0.971963,0.971963,0.971963	NCBI Hits Summary
OTU496	Unclassified;	Eukaryota;SAR;Rhizaria;Cercozoa;	Eukaryota;Cercozoa;Cercozoa_unclassified;Cercozoa_unclassified;Cercozoa_unclassified;Cercozoa_unclassified	7	1.98489e-05	Cercozoa	AY642694,EU567254	0.973054,0.964072	NCBI Hits Summary
OTU499	Eukaryota;environmental samples;	Eukaryota;SAR;Alveolata;	Eukaryota;Dinoflagellata;Dinophyceae;Dinophyceae_unclassified;Dinophyceae_unclassified;Dinophyceae_unclassified	7	3.47357e-05	Dinoflagellata	KJ763588,KJ758039,JN090875,KJ757407,DQ103862,AY121856,KJ757956	0.951515,0.951515,0.948485,0.945455,0.945455,0.945455,0.945455	NCBI Hits Summary
OTU500	Eukaryota;environmental samples;	Eukaryota;SAR;Alveolata;	Eukaryota;Dinoflagellata;Dinophyceae;Gymnodiniphycidae;Gymnodinium_clade;Gymnodinium_clade_unclassified	7	9.92447e-06	Dinoflagellata	KJ758254,KJ758214,DQ103871,KJ758547,DQ103860,KJ759489,FJ947037	0.945455,0.945455,0.942424,0.942424,0.939394,0.939394,0.939394	NCBI Hits Summary
OTU503	Unclassified;	Eukaryota;Amorphea;Amoebozoa;SAR;Stramenopiles;Labyrinthulomycetes;Sorodiplophrys;	Eukaryota;Eukaryota_unclassified;Eukaryota_unclassified;Eukaryota_unclassified;Eukaryota_unclassified;Eukaryota_unclassified	7	1.98489e-05	Eukaryota_unclassified	FPLS01016464	0.946108	NCBI Hits Summary
OTU509	Unclassified;	Unclassified;	Eukaryota;Eukaryota_unclassified;Eukaryota_unclassified;Eukaryota_unclassified;Eukaryota_unclassified;Eukaryota_unclassified	7	1.98489e-05	Eukaryota_unclassified			NCBI Hits Summary
OTU518	Eukaryota;	Eukaryota;SAR;Alveolata;	Eukaryota;Dinoflagellata;Dinophyceae;Dinophyceae_unclassified;Dinophyceae_unclassified;Dinophyceae_unclassified	7	1.48867e-05	Dinoflagellata	KJ759537,DQ103871,KJ759489,KJ758159,KJ757985,AY421789,KJ758547,AF022196	0.907975,0.907975,0.907975,0.907975,0.907975,0.907975,0.907975,0.907975	NCBI Hits Summary
OTU528	Eukaryota;	Eukaryota;SAR;Alveolata;	Eukaryota;Dinoflagellata;Dinophyceae;Gymnodiniphycidae;Gymnodinium_clade;Gymnodinium_clade_unclassified	7	1.48867e-05	Dinoflagellata	KJ762096,KJ757407,AY421789,DQ103871,AF022194,KJ758214,FJ947037	0.930464,0.927152,0.927152,0.927152,0.927152,0.923841,0.923841	NCBI Hits Summary
OTU536	Eukaryota;	Eukaryota;SAR;Alveolata;	Eukaryota;Dinoflagellata;Dinoflagellata_unclassified;Dinoflagellata_unclassified;Dinoflagellata_unclassified;Dinoflagellata_unclassified	7	5.45846e-05	Dinoflagellata	KJ763353,EF058253,KJ758148,KJ757309,GU824763,KJ759350,KJ759390,KJ758265	0.94864,0.94864,0.94864,0.945619,0.945619,0.945619,0.945619,0.945619	NCBI Hits Summary
OTU592	Eukaryota;Alveolata;Ciliophora;Intramacronucleata;	Eukaryota;SAR;Alveolata;Ciliophora;Intramacronucleata;Conthreep;Oligohymenophorea;Peniculia;	Eukaryota;Ciliophora;Intramacronucleata;Conthreep;Oligohymenophorea;Stokesia	7	2.48112e-05	Ciliophora	HM030738,KT461932	0.926154,0.916923	NCBI Hits Summary
OTU608	Eukaryota;	Eukaryota;SAR;Alveolata;Dinoflagellata;Dinophyceae;	Eukaryota;Dinoflagellata;Dinophyceae;Dinophyceae_unclassified;Dinophyceae_unclassified;Dinophyceae_unclassified	7	1.98489e-05	Dinoflagellata	KC771146,LC054949,KJ763731,HM066998,KJ762965,KJ760672,JF791103	0.990654,0.984424,0.981308,0.981308,0.981308,0.981308,0.981308	NCBI Hits Summary
OTU616	Eukaryota;Viridiplantae;Chlorophyta;	Eukaryota;Archaeplastida;Chloroplastida;Chlorophyta;	Eukaryota;Chlorophyta_ph;Trebouxiophyceae;Trebouxiophyceae_or;Trebouxiophyceae_fa;Trebouxiophyceae_ge	7	9.92447e-06	Chlorophyta/Trebouxiophyceae	AB080305	0.969697	NCBI Hits Summary
OTU623	Eukaryota;Stramenopiles;	Eukaryota;SAR;Stramenopiles;Ochrophyta;Eustigmatophyceae;Eustigmatales;Nannochloropsis;	Eukaryota;Ochrophyta_ph;Eustigmatophyceae;Eustigmatales;Eustigmatales_fa;Nannochloropsis	7	9.92447e-06	Eustigmatophyceae	AF045042,GQ122355,FJ153674	0.959877,0.959877,0.95679	NCBI Hits Summary
OTU647	Eukaryota;	Eukaryota;SAR;Stramenopiles;Ochrophyta;Diatomea;Bacillariophytina;Mediophyceae;Thalassiosira;	Eukaryota;Diatomea;Mediophyceae;Mediophyceae_or;Mediophyceae_fa;Mediophyceae_fa_unclassified	7	3.47357e-05	Bacillariophyceae	JQ782059,KJ757925,KJ758126,KJ758081,KJ757896,KJ758228,JQ782078,KC771208	0.94864,0.945619,0.945619,0.945619,0.945619,0.945619,0.945619,0.945619	NCBI Hits Summary
OTU706	Eukaryota;environmental samples;	Eukaryota;SAR;Alveolata;	Eukaryota;Dinoflagellata;Dinophyceae;Dinophyceae_unclassified;Dinophyceae_unclassified;Dinophyceae_unclassified	7	1.98489e-05	Dinoflagellata	KJ758217,KJ758318,DQ103871,KJ758345,KJ759489,KJ758547,KJ757985,KJ757751	0.966667,0.966667,0.963636,0.963636,0.963636,0.963636,0.963636,0.963636	NCBI Hits Summary
OTU760	Unclassified;	Unclassified;	Eukaryota;Ochrophyta_ph;Ochrophyta_ph_unclassified;Ochrophyta_ph_unclassified;Ochrophyta_ph_unclassified;Ochrophyta_ph_unclassified	7	5.95468e-05	Ochrophyta_ph_unclassified			NCBI Hits Summary
OTU1000	Eukaryota;	Eukaryota;SAR;Stramenopiles;Ochrophyta;Chrysophyceae;	Eukaryota;Ochrophyta_ph;Chrysophyceae;Chrysophyceae_unclassified;Chrysophyceae_unclassified;Chrysophyceae_unclassified	7	3.96979e-05	Chrysophyceae	AB474963,MG674913,AF123293	0.939024,0.939024,0.932927	NCBI Hits Summary
OTU1159	Eukaryota;	Eukaryota;SAR;Stramenopiles;Ochrophyta;Diatomea;Bacillariophytina;Bacillariophyceae;	Eukaryota;Diatomea;Diatomea_unclassified;Diatomea_unclassified;Diatomea_unclassified;Diatomea_unclassified	7	1.98489e-05	Bacillariophyceae	KC771179,KC771176,KC771191,KC771173,AJ867279,KC771178,KC771177	0.966463,0.966463,0.963415,0.963415,0.963415,0.963415,0.963415	NCBI Hits Summary
OTU1212	Eukaryota;environmental samples;	Eukaryota;SAR;Alveolata;	Eukaryota;Dinoflagellata;Dinophyceae;Gymnodiniphycidae;Gymnodinium_clade;Gymnodinium_clade_unclassified	7	9.92447e-06	Dinoflagellata	KJ758547,DQ103871,KJ758254,AF022196,KJ759537,KJ757452,KJ758214,DQ103860	0.957576,0.957576,0.954545,0.954545,0.954545,0.954545,0.954545,0.954545	NCBI Hits Summary
OTU1215	Eukaryota;environmental samples;	Eukaryota;SAR;Alveolata;	Eukaryota;Dinoflagellata;Dinophyceae;Gymnodiniphycidae;Gymnodinium_clade;Gymnodinium_clade_ge	7	9.92447e-06	Dinoflagellata	KJ758547,DQ103871,KJ757985,AF022196,DQ103860,KJ759537,KJ759489,KJ758254	0.948485,0.948485,0.945455,0.945455,0.945455,0.945455,0.945455,0.945455	NCBI Hits Summary
OTU1247	Eukaryota;	Eukaryota;SAR;Alveolata;Dinoflagellata;Dinophyceae;	Eukaryota;Dinoflagellata;Dinophyceae;Peridiniphycidae_or;Thoracosphaeraceae;Thoracosphaeraceae_unclassified	7	1.98489e-05	Dinoflagellata	KC771146,AY251288	0.966667,0.960606	NCBI Hits Summary
OTU451	Eukaryota;	Eukaryota;SAR;Alveolata;	Eukaryota;Dinoflagellata;Dinophyceae;Dinophyceae_unclassified;Dinophyceae_unclassified;Dinophyceae_unclassified	6	1.48867e-05	Dinoflagellata	KC771146,KJ763731,KJ758116,KJ760672,KR535601,KJ763230,KJ763426	0.993691,0.981073,0.981073,0.981073,0.981073,0.981073,0.981073	NCBI Hits Summary
OTU482	Eukaryota;environmental samples;	Eukaryota;SAR;Alveolata;	Eukaryota;Dinoflagellata;Dinophyceae;Dinophyceae_unclassified;Dinophyceae_unclassified;Dinophyceae_unclassified	6	2.97734e-05	Dinoflagellata	KJ757950,KJ762691,KJ763359,KJ762932,KJ762900,KJ762908,KJ762871,KJ763365,KJ763031	0.914373,0.914373,0.914373,0.914373,0.914373,0.914373,0.914373,0.914373,0.914373	NCBI Hits Summary
OTU483	Eukaryota;	Eukaryota;SAR;Stramenopiles;Ochrophyta;Chrysophyceae;	Eukaryota;Ochrophyta_ph;Chrysophyceae;Chrysophyceae_unclassified;Chrysophyceae_unclassified;Chrysophyceae_unclassified	6	1.98489e-05	Chrysophyceae	AB749103,AB749145,GU290107	0.984756,0.954268,0.951219	NCBI Hits Summary
OTU485	Eukaryota;Alveolata;Ciliophora;Intramacronucleata;Phyllopharyngea;Phyllopharyngia;Chlamydodontida;Chilodonellidae;	Eukaryota;SAR;Alveolata;Ciliophora;Intramacronucleata;Conthreep;Phyllopharyngea;Cyrtophoria;	Eukaryota;Ciliophora;Intramacronucleata;Conthreep;Conthreep_unclassified;Conthreep_unclassified	6	2.48112e-05	Ciliophora	KC753496,JN867021,KJ452458,AF300282	0.984177,0.984177,0.96519,0.96519	NCBI Hits Summary
OTU486	Eukaryota;	Eukaryota;SAR;Alveolata;	Eukaryota;Dinoflagellata;Dinophyceae;Dinophyceae_unclassified;Dinophyceae_unclassified;Dinophyceae_unclassified	6	1.48867e-05	Dinoflagellata	KC771146,KJ763426,KJ763731,KR535601,KJ762965,KJ760672,KJ762730	0.990654,0.978193,0.978193,0.978193,0.978193,0.978193,0.978193	NCBI Hits Summary
OTU488	Eukaryota;	Eukaryota;SAR;Alveolata;	Eukaryota;Dinoflagellata;Dinophyceae;Dinophyceae_unclassified;Dinophyceae_unclassified;Dinophyceae_unclassified	6	1.48867e-05	Dinoflagellata	KC771146,DQ103862,AY251288,AY590483	0.963636,0.960606,0.957576,0.957576	NCBI Hits Summary
OTU492	Eukaryota;environmental samples;	Eukaryota;SAR;Alveolata;	Eukaryota;Eukaryota_unclassified;Eukaryota_unclassified;Eukaryota_unclassified;Eukaryota_unclassified;Eukaryota_unclassified	6	2.48112e-05	Eukaryota_unclassified	KJ762691,KJ757950,KJ759500,KJ762321,KJ763359,KJ762416,KJ763108,KJ758503	0.929664,0.929664,0.926606,0.926606,0.926606,0.926606,0.926606,0.926606	NCBI Hits Summary
OTU493	Eukaryota;Fungi;Dikarya;Ascomycota;Pezizomycotina;Dothideomycetes;Dothideomycetidae;	Eukaryota;Amorphea;Obazoa;Opisthokonta;Nucletmycea;Fungi;Dikarya;Ascomycota;Pezizomycotina;Dothideomycetes;	Eukaryota;Ascomycota;Dothideomycetes;Dothideales;Dothioraceae;Delphinella	6	2.97734e-05	Ascomycota	EU167601,EU167593	0.990991,0.987988	NCBI Hits Summary
OTU498	Eukaryota;	Eukaryota;SAR;Alveolata;Ciliophora;Intramacronucleata;Conthreep;Phyllopharyngea;Cyrtophoria;	Eukaryota;Ciliophora;Intramacronucleata;Intramacronucleata_unclassified;Intramacronucleata_unclassified;Intramacronucleata_unclassified	6	2.48112e-05	Ciliophora	KR611082,KC753496,FPLS01009483,JN867021,KR611084	0.958861,0.949367,0.949367,0.946203,0.946203	NCBI Hits Summary
OTU501	Eukaryota;Fungi;Dikarya;Basidiomycota;Pucciniomycotina;Cystobasidiomycetes;	Eukaryota;Amorphea;Obazoa;Opisthokonta;Nucletmycea;Fungi;Dikarya;Basidiomycota;Pucciniomycotina;Cystobasidiomycetes;	Eukaryota;Basidiomycota;Cystobasidiomycetes;Cystobasidiomycetes_unclassified;Cystobasidiomycetes_unclassified;Cystobasidiomycetes_unclassified	6	2.97734e-05	Basidiomycota	AB055191,LC158351	0.993994,0.990991	NCBI Hits Summary
OTU502	Eukaryota;	Eukaryota;Amorphea;Obazoa;Opisthokonta;Nucletmycea;Fungi;Chytridiomycota;Incertae Sedis;Chytridiomycetes;	Eukaryota;Chytridiomycota;Chytridiomycetes;Rhizophydiales;uncultured;uncultured_ge	6	3.96979e-05	Chytridiomycota	DQ244005,EF023155,DQ244014,AY642695	0.951662,0.936556,0.933535,0.933535	NCBI Hits Summary
OTU505	Unclassified;	Unclassified;	Eukaryota;Eukaryota_unclassified;Eukaryota_unclassified;Eukaryota_unclassified;Eukaryota_unclassified;Eukaryota_unclassified	6	1.48867e-05	Eukaryota_unclassified			NCBI Hits Summary
OTU507	Eukaryota;Euglenozoa;Diplonemida;	Eukaryota;Discoba;Discicristata;Euglenozoa;Diplonemea;	Eukaryota;Eukaryota_unclassified;Eukaryota_unclassified;Eukaryota_unclassified;Eukaryota_unclassified;Eukaryota_unclassified	6	2.97734e-05	Eukaryota_unclassified	AY425009,AY425012,AY490210	0.929825,0.923977,0.921053	NCBI Hits Summary
OTU508	Unclassified;	Unclassified;	Eukaryota;Eukaryota_unclassified;Eukaryota_unclassified;Eukaryota_unclassified;Eukaryota_unclassified;Eukaryota_unclassified	6	2.48112e-05	Eukaryota_unclassified			NCBI Hits Summary
OTU512	Eukaryota;Fungi;Fungi incertae sedis;Chytridiomycota;	Eukaryota;Amorphea;Obazoa;Opisthokonta;Nucletmycea;Fungi;Chytridiomycota;Incertae Sedis;Chytridiomycetes;Rhizophydiales;	Eukaryota;Chytridiomycota;Chytridiomycetes;Rhizophydiales;Rhizophydiales_unclassified;Rhizophydiales_unclassified	6	2.48112e-05	Chytridiomycota	KF160860	0.987988	NCBI Hits Summary
OTU514	Eukaryota;Fungi;Dikarya;Ascomycota;Pezizomycotina;Leotiomycetes;Helotiales;	Eukaryota;Amorphea;Obazoa;Opisthokonta;Nucletmycea;Fungi;Dikarya;Ascomycota;Pezizomycotina;Leotiomycetes;	Eukaryota;Ascomycota;Leotiomycetes;Helotiales;Helotiales_fa;Helotiales_ge	6	1.98489e-05	Ascomycota	AY762620,AY838785,AY838789,AY524847	0.987952,0.98494,0.98494,0.981928	NCBI Hits Summary
OTU515	Eukaryota;Fungi;Dikarya;Ascomycota;Pezizomycotina;Leotiomycetes;	Eukaryota;Amorphea;Obazoa;Opisthokonta;Nucletmycea;Fungi;Dikarya;Ascomycota;Pezizomycotina;Leotiomycetes;Helotiales;	Eukaryota;Ascomycota;Ascomycota_unclassified;Ascomycota_unclassified;Ascomycota_unclassified;Ascomycota_unclassified	6	1.98489e-05	Ascomycota	LNKV01000098,EU107178,KJ001635,U45445,AY524846,AY524843,AY544713	0.957958,0.951952,0.948949,0.948949,0.948949,0.948949,0.948949	NCBI Hits Summary
OTU516	Eukaryota;Fungi;Dikarya;Basidiomycota;Pucciniomycotina;Microbotryomycetes;Sporidiobolales;Sporidiobolaceae;Rhodotorula;	Eukaryota;Amorphea;Obazoa;Opisthokonta;Nucletmycea;Fungi;Dikarya;Basidiomycota;Pucciniomycotina;Microbotryomycetes;Sporidiobolales;Sporidiobolaceae;Rhodotorula;	Eukaryota;Basidiomycota;Microbotryomycetes;Sporidiobolales;Sporidiobolaceae;Sporidiobolaceae_unclassified	6	2.48112e-05	Basidiomycota	AB016293,X83827,AB073270,AB016292,AB016291,AB073273,KJ530980	0.996997,0.996997,0.996997,0.996997,0.996997,0.996997,0.990991	NCBI Hits Summary
OTU517	Eukaryota;environmental samples;	Eukaryota;SAR;Alveolata;Ciliophora;Intramacronucleata;Conthreep;Phyllopharyngea;Suctoria;	Eukaryota;Eukaryota_unclassified;Eukaryota_unclassified;Eukaryota_unclassified;Eukaryota_unclassified;Eukaryota_unclassified	6	1.48867e-05	Ciliophora			NCBI Hits Summary
OTU523	Eukaryota;	Eukaryota;SAR;Alveolata;	Eukaryota;Dinoflagellata;Dinophyceae;Dinophyceae_unclassified;Dinophyceae_unclassified;Dinophyceae_unclassified	6	1.48867e-05	Dinoflagellata	KC771146,KJ760672,KJ763731,KR535601,KJ763426,KJ762730,KJ762965	0.966667,0.951515,0.951515,0.951515,0.951515,0.951515,0.951515	NCBI Hits Summary
OTU524	Eukaryota;Fungi;Dikarya;Ascomycota;Pezizomycotina;Eurotiomycetes;Eurotiomycetidae;Eurotiales;Aspergillaceae;Penicillium;	Eukaryota;Amorphea;Obazoa;Opisthokonta;Nucletmycea;Fungi;Dikarya;Ascomycota;Pezizomycotina;Eurotiomycetes;Eurotiales;Aspergillaceae;	Eukaryota;Ascomycota;Eurotiomycetes;Eurotiales;Aspergillaceae;Penicillium	6	1.48867e-05	Ascomycota	AF411201,AJ005446,GQ458035,GQ458038,AB028137,LHQR01000013,GQ458039	1,1,1,1,1,1,1	NCBI Hits Summary
OTU525	Unclassified;	Unclassified;	Eukaryota;Dinoflagellata;Dinophyceae;Dinophyceae_unclassified;Dinophyceae_unclassified;Dinophyceae_unclassified	6	9.92447e-06	Dinoflagellata			NCBI Hits Summary
OTU529	Eukaryota;	Eukaryota;SAR;Stramenopiles;Ochrophyta;Eustigmatophyceae;Eustigmatales;Nannochloropsis;	Eukaryota;Ochrophyta_ph;Eustigmatophyceae;Eustigmatales;Eustigmatales_fa;Nannochloropsis	6	9.92447e-06	Eustigmatophyceae	GQ122355,AF045042,FJ153674	0.95679,0.95679,0.953704	NCBI Hits Summary
OTU531	Eukaryota;Stramenopiles;Bacillariophyta;Coscinodiscophyceae;Coscinodiscophycidae;Aulacoseiraceae;Aulacoseira;	Eukaryota;SAR;Stramenopiles;Ochrophyta;Diatomea;Coscinodiscophytina;Melosirids;Aulacoseira;	Eukaryota;Diatomea;Coscinodiscophytina_cl;Coscinodiscophytina_or;Melosirids;Aulacoseira	6	5.45846e-05	Bacillariophyceae	AY121820	0.933333	NCBI Hits Summary
OTU532	Eukaryota;	Eukaryota;SAR;Alveolata;Dinoflagellata;Dinophyceae;	Eukaryota;Dinoflagellata;Dinophyceae;Peridiniphycidae_or;Thoracosphaeraceae;Thoracosphaeraceae_unclassified	6	1.48867e-05	Dinoflagellata	KC771146,JF791101,DQ103862,AY251288,KR535601,KJ763731,JF791103	0.963526,0.951368,0.951368,0.951368,0.951368,0.951368,0.951368	NCBI Hits Summary
OTU542	Eukaryota;environmental samples;	Eukaryota;SAR;Alveolata;	Eukaryota;Dinoflagellata;Dinophyceae;Dinophyceae_unclassified;Dinophyceae_unclassified;Dinophyceae_unclassified	6	1.98489e-05	Dinoflagellata	KJ763588,KJ758039,KJ757956,DQ103862,KJ757407	0.960606,0.960606,0.954545,0.954545,0.954545	NCBI Hits Summary
OTU570	Eukaryota;environmental samples;	Eukaryota;SAR;Alveolata;	Eukaryota;Dinoflagellata;Dinophyceae;Dinophyceae_unclassified;Dinophyceae_unclassified;Dinophyceae_unclassified	6	1.48867e-05	Dinoflagellata	KJ757407,KJ758039,KJ763588,KJ762951,KJ758256,KJ762789,KF130216	0.957576,0.957576,0.957576,0.954545,0.954545,0.954545,0.951515	NCBI Hits Summary
OTU573	Eukaryota;environmental samples;	Eukaryota;SAR;Alveolata;	Eukaryota;Eukaryota_unclassified;Eukaryota_unclassified;Eukaryota_unclassified;Eukaryota_unclassified;Eukaryota_unclassified	6	2.97734e-05	Eukaryota_unclassified	KJ763359,KJ762691,KJ762416,KJ762321,KJ759266,KJ759500,KJ763108,KJ762900,KJ757950	0.935976,0.935976,0.935976,0.935976,0.935976,0.935976,0.935976,0.935976,0.935976	NCBI Hits Summary
OTU574	Eukaryota;Stramenopiles;	Eukaryota;SAR;Stramenopiles;Ochrophyta;Eustigmatophyceae;Eustigmatales;Nannochloropsis;	Eukaryota;Ochrophyta_ph;Eustigmatophyceae;Eustigmatales;Eustigmatales_fa;Nannochloropsis	6	1.48867e-05	Eustigmatophyceae	AF045042,GQ122355,KT860957	0.963077,0.963077,0.96	NCBI Hits Summary
OTU599	Eukaryota;environmental samples;	Eukaryota;SAR;Alveolata;Ciliophora;Intramacronucleata;Spirotrichea;Oligotrichia;	Eukaryota;Ciliophora;Intramacronucleata;Spirotrichea;Spirotrichea_unclassified;Spirotrichea_unclassified	6	5.45846e-05	Ciliophora	KJ762762,KJ757380,KJ757781,KJ762375,KJ762724,KJ763672,AY129035,KJ762442	0.947205,0.947205,0.947205,0.947205,0.947205,0.947205,0.944099,0.944099	NCBI Hits Summary
OTU602	Eukaryota;environmental samples;	Eukaryota;SAR;Alveolata;	Eukaryota;Eukaryota_unclassified;Eukaryota_unclassified;Eukaryota_unclassified;Eukaryota_unclassified;Eukaryota_unclassified	6	1.48867e-05	Eukaryota_unclassified	KC771146,KJ763064,KJ760672,KJ762730,KJ758116,KJ764413,KJ763731	0.957576,0.945455,0.945455,0.945455,0.945455,0.945455,0.945455	NCBI Hits Summary
OTU609	Eukaryota;Stramenopiles;Bacillariophyta;Fragilariophyceae;Fragilariophycidae;	Eukaryota;SAR;Stramenopiles;Ochrophyta;Diatomea;Coscinodiscophytina;Fragilariales;	Eukaryota;Diatomea;Coscinodiscophytina_cl;Fragilariales;Fragilariales_fa;Ulnaria	6	7.93958e-05	Bacillariophyceae	EF423422,EF465476	0.944954,0.944954	NCBI Hits Summary
OTU638	Eukaryota;	Eukaryota;SAR;Stramenopiles;Ochrophyta;Chrysophyceae;	Eukaryota;Ochrophyta_ph;Chrysophyceae;Chrysophyceae_unclassified;Chrysophyceae_unclassified;Chrysophyceae_unclassified	6	2.97734e-05	Chrysophyceae	MG674913,AB695532,AB749134,FPLS01004254	0.932927,0.929878,0.929878,0.929878	NCBI Hits Summary
OTU658	Eukaryota;Stramenopiles;	Eukaryota;SAR;Stramenopiles;Ochrophyta;Diatomea;Bacillariophytina;Mediophyceae;Thalassiosira;	Eukaryota;Diatomea;Mediophyceae;Mediophyceae_or;Mediophyceae_fa;Mediophyceae_fa_unclassified	6	3.47357e-05	Bacillariophyceae	AM050629,JQ782074,LC189086,KT347147,DQ093366	0.97281,0.966767,0.963746,0.963746,0.963746	NCBI Hits Summary
OTU698	Eukaryota;	Eukaryota;SAR;Alveolata;	Eukaryota;Dinoflagellata;Dinoflagellata_unclassified;Dinoflagellata_unclassified;Dinoflagellata_unclassified;Dinoflagellata_unclassified	6	1.48867e-05	Dinoflagellata	KC771146,KJ763731,KJ758116,KJ760672,KJ762844,KJ763426,KR535601	0.969136,0.95679,0.95679,0.95679,0.95679,0.95679,0.95679	NCBI Hits Summary
OTU742	Eukaryota;environmental samples;	Eukaryota;SAR;Alveolata;	Eukaryota;Eukaryota_unclassified;Eukaryota_unclassified;Eukaryota_unclassified;Eukaryota_unclassified;Eukaryota_unclassified	6	2.48112e-05	Eukaryota_unclassified	KJ762691,KJ762416,KJ763359,KJ762321,KJ759266,KJ759500,KJ763108,KJ762900,KJ757950	0.935976,0.935976,0.935976,0.935976,0.935976,0.935976,0.935976,0.935976,0.935976	NCBI Hits Summary
OTU769	unclassified sequences;metagenomes;	Eukaryota;Amorphea;Amoebozoa;SAR;Stramenopiles;Labyrinthulomycetes;Sorodiplophrys;	Eukaryota;Eukaryota_unclassified;Eukaryota_unclassified;Eukaryota_unclassified;Eukaryota_unclassified;Eukaryota_unclassified	6	2.48112e-05	Eukaryota_unclassified			NCBI Hits Summary
OTU832	Eukaryota;Viridiplantae;Chlorophyta;Chlorophyceae;Sphaeropleales;	Eukaryota;Archaeplastida;Chloroplastida;Chlorophyta;Chlorophyceae;Sphaeropleales;	Eukaryota;Chlorophyta_ph;Chlorophyta_ph_unclassified;Chlorophyta_ph_unclassified;Chlorophyta_ph_unclassified;Chlorophyta_ph_unclassified	6	1.98489e-05	Chlorophyta	HM021304,KP726271	0.993902,0.981707	NCBI Hits Summary
OTU878	Eukaryota;	Eukaryota;SAR;Alveolata;Dinoflagellata;Dinophyceae;	Eukaryota;Dinoflagellata;Dinophyceae;Dinophyceae_unclassified;Dinophyceae_unclassified;Dinophyceae_unclassified	6	1.48867e-05	Dinoflagellata	KC771146,EF492511	0.939297,0.929712	NCBI Hits Summary
OTU892	Eukaryota;	Eukaryota;SAR;Stramenopiles;Ochrophyta;Diatomea;	Eukaryota;Diatomea;Coscinodiscophytina_cl;Coscinodiscophytina_or;Coscinodiscophytina_or_unclassified;Coscinodiscophytina_or_unclassified	6	3.47357e-05	Bacillariophyceae	AY121820	0.936364	NCBI Hits Summary
OTU924	Eukaryota;environmental samples;	Eukaryota;SAR;Alveolata;	Eukaryota;Dinoflagellata;Dinophyceae;Dinophyceae_unclassified;Dinophyceae_unclassified;Dinophyceae_unclassified	6	1.48867e-05	Dinoflagellata	KJ763064,KJ758051,KJ758302,KJ758207,KJ762965,KJ757295,JF791103,KJ760672	0.963636,0.963636,0.963636,0.963636,0.960606,0.960606,0.960606,0.960606	NCBI Hits Summary
OTU1071	Eukaryota;environmental samples;	Eukaryota;SAR;Alveolata;	Eukaryota;Eukaryota_unclassified;Eukaryota_unclassified;Eukaryota_unclassified;Eukaryota_unclassified;Eukaryota_unclassified	6	2.97734e-05	Eukaryota_unclassified	KJ758503,KJ757950,KJ762416,KJ762321,KJ762691,HM581708,KJ759266	0.939024,0.929878,0.929878,0.929878,0.929878,0.929878,0.929878	NCBI Hits Summary
OTU1079	Eukaryota;Alveolata;Ciliophora;Intramacronucleata;Spirotrichea;	Eukaryota;SAR;Alveolata;Ciliophora;Intramacronucleata;Spirotrichea;	Eukaryota;Ciliophora;Intramacronucleata;Spirotrichea;Spirotrichea_unclassified;Spirotrichea_unclassified	6	2.97734e-05	Ciliophora	AM412524,GU290112,AJ877014,JQ924058	0.919003,0.912773,0.909657,0.909657	NCBI Hits Summary
OTU1245	Eukaryota;	Eukaryota;SAR;Alveolata;	Eukaryota;Dinoflagellata;Dinophyceae;Dinophyceae_unclassified;Dinophyceae_unclassified;Dinophyceae_unclassified	6	1.48867e-05	Dinoflagellata	KC771146,EF492511,KJ762965,DQ103862,KJ757885,KJ762730,KJ758116	0.966565,0.957447,0.954407,0.954407,0.954407,0.954407,0.954407	NCBI Hits Summary
OTU1273	Eukaryota;Stramenopiles;Bacillariophyta;Bacillariophyceae;Bacillariophycidae;	Eukaryota;SAR;Stramenopiles;Ochrophyta;Diatomea;Bacillariophytina;Bacillariophyceae;	Eukaryota;Diatomea;Bacillariophyceae;Bacillariophyceae_or;Bacillariophyceae_fa;Neidium	6	2.97734e-05	Bacillariophyceae	HQ912582,HQ912583,KJ961678,AJ243063,AJ535153,AM501961,KT072999	0.938272,0.938272,0.904321,0.904321,0.904321,0.904321,0.904321	NCBI Hits Summary
OTU470	Eukaryota;Viridiplantae;Chlorophyta;Ulvophyceae;	Eukaryota;Archaeplastida;Chloroplastida;Chlorophyta;Ulvophyceae;	Eukaryota;Chlorophyta_ph;Ulvophyceae;Ulvophyceae_or;Ulvophyceae_fa;Ulvophyceae_ge	5	1.98489e-05	Chlorophyta	MF034602,Z47996,FR865654,MF034647,Z28970	0.957055,0.957055,0.957055,0.941718,0.941718	NCBI Hits Summary
OTU533	Eukaryota;Rhizaria;Cercozoa;environmental samples;	Eukaryota;SAR;Rhizaria;Cercozoa;Novel Clade 10;	Eukaryota;Eukaryota_unclassified;Eukaryota_unclassified;Eukaryota_unclassified;Eukaryota_unclassified;Eukaryota_unclassified	5	2.48112e-05	Cercozoa	EU162632	0.938838	NCBI Hits Summary
OTU537	Eukaryota;	Eukaryota;SAR;Alveolata;Dinoflagellata;Dinophyceae;	Eukaryota;Dinoflagellata;Dinophyceae;Dinophyceae_unclassified;Dinophyceae_unclassified;Dinophyceae_unclassified	5	9.92447e-06	Dinoflagellata	KC771146,AY590483,FN557541,JF791101,LC054949,KJ763731,KJ763426	0.978723,0.969605,0.969605,0.966565,0.966565,0.966565,0.966565	NCBI Hits Summary
OTU539	Eukaryota;	Eukaryota;SAR;Alveolata;Dinoflagellata;Dinophyceae;	Eukaryota;Dinoflagellata;Dinoflagellata_unclassified;Dinoflagellata_unclassified;Dinoflagellata_unclassified;Dinoflagellata_unclassified	5	9.92447e-06	Dinoflagellata	KC771146,KJ758195,JN090875,AY121856	0.945455,0.942424,0.942424,0.939394	NCBI Hits Summary
OTU541	Eukaryota;Stramenopiles;environmental samples;	Eukaryota;SAR;Stramenopiles;MAST-12;	Eukaryota;MAST-12;MAST-12A;MAST-12A_or;MAST-12A_fa;MAST-12A_ge	5	1.48867e-05	MAST-12A			NCBI Hits Summary
OTU546	Unclassified;	Unclassified;	Eukaryota;Ciliophora;Intramacronucleata;Conthreep;Phyllopharyngea;Acineta	5	2.48112e-05	Ciliophora			NCBI Hits Summary
OTU549	Eukaryota;Alveolata;Ciliophora;	Eukaryota;SAR;Alveolata;Ciliophora;Intramacronucleata;Conthreep;Oligohymenophorea;Peritrichia;	Eukaryota;Ciliophora;Intramacronucleata;Conthreep;Oligohymenophorea;Oligohymenophorea_unclassified	5	1.98489e-05	Ciliophora	AF401526,GU187053,JX869064	0.95098,0.944444,0.944444	NCBI Hits Summary
OTU550	Unclassified;	Eukaryota;SAR;Stramenopiles;Ochrophyta;Chrysophyceae;	Eukaryota;Ochrophyta_ph;Chrysophyceae;Chromulinales;Chromulinales_fa;Chromulinales_fa_unclassified	5	2.48112e-05	Chrysophyceae	MG674913,FPLK01000642,M87332,AJ236861	0.911315,0.905199,0.905199,0.905199	NCBI Hits Summary
OTU552	Unclassified;	Eukaryota;SAR;Stramenopiles;Ochrophyta;Chrysophyceae;	Eukaryota;Ochrophyta_ph;Chrysophyceae;Chromulinales;Chromulinales_fa;Spumella	5	2.97734e-05	Chrysophyceae	FPLS01038393,KP404840,FR865768,HAFO01005448,EF023425,AY082970	0.954128,0.954128,0.95107,0.95107,0.948012,0.948012	NCBI Hits Summary
OTU553	Eukaryota;Viridiplantae;Chlorophyta;Ulvophyceae;	Eukaryota;Archaeplastida;Chloroplastida;Chlorophyta;Ulvophyceae;	Eukaryota;Chlorophyta_ph;Ulvophyceae;Ulvophyceae_or;Ulvophyceae_fa;Ulvophyceae_ge	5	1.98489e-05	Chlorophyta	Z47996,MF034602,FR865654,Z28970,MF034601	0.957055,0.957055,0.957055,0.941718,0.941718	NCBI Hits Summary
OTU554	Eukaryota;	Eukaryota;Archaeplastida;Chloroplastida;Chlorophyta;Mamiellophyceae;	Eukaryota;Eukaryota_unclassified;Eukaryota_unclassified;Eukaryota_unclassified;Eukaryota_unclassified;Eukaryota_unclassified	5	2.97734e-05	Chlorophyta	AB275082,AB275081	0.960366,0.960366	NCBI Hits Summary
OTU555	Eukaryota;Stramenopiles;	Eukaryota;SAR;Stramenopiles;Ochrophyta;Chrysophyceae;	Eukaryota;Ochrophyta_ph;Chrysophyceae;Chrysophyceae_unclassified;Chrysophyceae_unclassified;Chrysophyceae_unclassified	5	2.48112e-05	Chrysophyceae	AB749076,EF185316,AY651071,MG674911	0.945122,0.945122,0.935976,0.935976	NCBI Hits Summary
OTU557	Eukaryota;Stramenopiles;	Eukaryota;SAR;Stramenopiles;Ochrophyta;Diatomea;Bacillariophytina;Bacillariophyceae;	Eukaryota;Diatomea;Bacillariophyceae;Bacillariophyceae_or;Bacillariophyceae_fa;Cymbella	5	2.48112e-05	Bacillariophyceae	AM502017,AM502004,AM502038	0.996923,0.950769,0.950769	NCBI Hits Summary
OTU558	Unclassified;	Unclassified;	Eukaryota;Eukaryota_unclassified;Eukaryota_unclassified;Eukaryota_unclassified;Eukaryota_unclassified;Eukaryota_unclassified	5	2.48112e-05	Eukaryota_unclassified			NCBI Hits Summary
OTU560	Eukaryota;environmental samples;	Eukaryota;SAR;Alveolata;	Eukaryota;Dinoflagellata;Dinoflagellata_unclassified;Dinoflagellata_unclassified;Dinoflagellata_unclassified;Dinoflagellata_unclassified	5	2.48112e-05	Dinoflagellata	KJ762691,KJ757950,KJ759500,KJ762416,KJ763359,KJ759266,KJ763108,HM581708	0.932927,0.932927,0.929878,0.929878,0.929878,0.929878,0.929878,0.929878	NCBI Hits Summary
OTU561	Eukaryota;environmental samples;	Eukaryota;SAR;Alveolata;	Eukaryota;Dinoflagellata;Dinophyceae;Dinophyceae_unclassified;Dinophyceae_unclassified;Dinophyceae_unclassified	5	2.48112e-05	Dinoflagellata	KJ762691	0.902439	NCBI Hits Summary
OTU562	Eukaryota;	Eukaryota;SAR;Alveolata;Dinoflagellata;Dinophyceae;Gymnodiniphycidae;Suessiaceae;	Eukaryota;Dinoflagellata;Dinophyceae;Dinophyceae_unclassified;Dinophyceae_unclassified;Dinophyceae_unclassified	5	2.48112e-05	Dinoflagellata	GU067954	0.948012	NCBI Hits Summary
OTU564	Unclassified;	Unclassified;	Eukaryota;Eukaryota_unclassified;Eukaryota_unclassified;Eukaryota_unclassified;Eukaryota_unclassified;Eukaryota_unclassified	5	2.48112e-05	Eukaryota_unclassified			NCBI Hits Summary
OTU566	Unclassified;	Eukaryota;SAR;Stramenopiles;Ochrophyta;Chrysophyceae;	Eukaryota;Ochrophyta_ph;Chrysophyceae;Chrysophyceae_unclassified;Chrysophyceae_unclassified;Chrysophyceae_unclassified	5	2.48112e-05	Chrysophyceae	FPLS01038393,AJ236861,MG674913,U73219,M87331,EF165132	0.917722,0.908228,0.908228,0.908228,0.908228,0.908228	NCBI Hits Summary
OTU567	Eukaryota;environmental samples;	Eukaryota;SAR;Alveolata;	Eukaryota;Eukaryota_unclassified;Eukaryota_unclassified;Eukaryota_unclassified;Eukaryota_unclassified;Eukaryota_unclassified	5	1.98489e-05	Eukaryota_unclassified	KJ763359,KJ763108,KJ762908,KJ762871,KJ763031,KJ763365,KJ759500,KJ759639,KJ762932	0.926829,0.926829,0.926829,0.926829,0.926829,0.926829,0.926829,0.926829,0.926829	NCBI Hits Summary
OTU571	Eukaryota;Fungi;Fungi incertae sedis;Chytridiomycota;environmental samples;	Eukaryota;Amorphea;Obazoa;Opisthokonta;Nucletmycea;Fungi;Chytridiomycota;Incertae Sedis;Chytridiomycetes;	Eukaryota;Chytridiomycota;Chytridiomycetes;Gromochytriales;Gromochytriaceae;uncultured	5	1.48867e-05	Chytridiomycota	EU162643	1	NCBI Hits Summary
OTU572	Eukaryota;Alveolata;Ciliophora;Intramacronucleata;Litostomatea;Haptoria;Pleurostomatida;	Eukaryota;SAR;Alveolata;Ciliophora;Intramacronucleata;Litostomatea;Haptoria;	Eukaryota;Ciliophora;Intramacronucleata;Litostomatea;Haptoria;Haptoria_unclassified	5	2.97734e-05	Ciliophora	FJ875149,DQ190465	0.966777,0.963455	NCBI Hits Summary
OTU577	Unclassified;	Unclassified;	Eukaryota;Eukaryota_unclassified;Eukaryota_unclassified;Eukaryota_unclassified;Eukaryota_unclassified;Eukaryota_unclassified	5	1.48867e-05	Eukaryota_unclassified			NCBI Hits Summary
OTU579	Eukaryota;Stramenopiles;	Eukaryota;SAR;Stramenopiles;Peronosporomycetes;	Eukaryota;Peronosporomycetes;Peronosporomycetes_cl;Peronosporomycetes_or;Peronosporomycetes_fa;Peronosporomycetes_ge	5	1.48867e-05	Peronosporomycetes	EF023544,AJ238658	0.981982,0.975976	NCBI Hits Summary
OTU580	Eukaryota;	Eukaryota;SAR;Alveolata;Ciliophora;Intramacronucleata;Litostomatea;Haptoria;	Eukaryota;Ciliophora;Intramacronucleata;Litostomatea;Haptoria;Hemiophrys	5	1.48867e-05	Ciliophora	KY355512	0.993355	NCBI Hits Summary
OTU583	Eukaryota;	Eukaryota;SAR;Alveolata;Ciliophora;Intramacronucleata;Conthreep;Oligohymenophorea;Peritrichia;	Eukaryota;Ciliophora;Intramacronucleata;Conthreep;Oligohymenophorea;Peritrichia_ge	5	1.48867e-05	Ciliophora	AB902048,JX178764,KX465164,JX869064,DQ487201,AF401526,GQ872429	0.98366,0.957516,0.954248,0.954248,0.954248,0.954248,0.954248	NCBI Hits Summary
OTU584	Eukaryota;	Eukaryota;Amorphea;Obazoa;Opisthokonta;Nucletmycea;Fungi;LKM15;	Eukaryota;LKM15;LKM15_cl;LKM15_or;LKM15_fa;LKM15_ge	5	1.48867e-05	LKM15	AB695464	0.97546	NCBI Hits Summary
OTU586	Eukaryota;Fungi;Dikarya;Ascomycota;Saccharomycotina;Saccharomycetes;Saccharomycetales;	Eukaryota;Amorphea;Obazoa;Opisthokonta;Nucletmycea;Fungi;Dikarya;Ascomycota;Saccharomycotina;Saccharomycetes;Saccharomycetales;	Eukaryota;Ascomycota;Saccharomycetes;Saccharomycetales;Saccharomycetales_unclassified;Saccharomycetales_unclassified	5	1.48867e-05	Ascomycota	AF294911,KF964126,AF294751,AB018126	0.973054,0.949102,0.949102,0.949102	NCBI Hits Summary
OTU587	Eukaryota;	Eukaryota;SAR;Alveolata;	Eukaryota;Dinoflagellata;Dinophyceae;Dinophyceae_unclassified;Dinophyceae_unclassified;Dinophyceae_unclassified	5	9.92447e-06	Dinoflagellata	KC771146,KJ763426,KJ763230,KJ762730,KJ763731,KJ762844,KJ762965	0.963636,0.951515,0.951515,0.951515,0.951515,0.951515,0.951515	NCBI Hits Summary
OTU588	Eukaryota;	Eukaryota;SAR;Stramenopiles;Hyphochytriomycetes;Hyphochytriales;	Eukaryota;Hyphochytriomycetes;Hyphochytriomycetes_cl;Hyphochytriales;Hyphochytriales_fa;Rhizidiomyces	5	1.48867e-05	Hyphochytriomycetes	LC109080	0.993921	NCBI Hits Summary
OTU589	Eukaryota;Fungi;Dikarya;Ascomycota;Pezizomycotina;Leotiomycetes;	Eukaryota;Amorphea;Obazoa;Opisthokonta;Nucletmycea;Fungi;Dikarya;Ascomycota;Pezizomycotina;Leotiomycetes;	Eukaryota;Ascomycota;Leotiomycetes;Helotiales;Helotiales_unclassified;Helotiales_unclassified	5	1.48867e-05	Ascomycota	AY762619,AY838785,AY838789,AY544713	0.972973,0.972973,0.972973,0.966967	NCBI Hits Summary
OTU590	Eukaryota;	Eukaryota;SAR;Alveolata;	Eukaryota;Dinoflagellata;Dinophyceae;Gymnodiniphycidae;Gymnodinium_clade;Gymnodinium_clade_unclassified	5	9.92447e-06	Dinoflagellata	AF022196,DQ103871,EF526865,KJ758547,KJ758254,KJ758214,KJ757985,KJ757452	0.927273,0.927273,0.927273,0.927273,0.924242,0.924242,0.924242,0.924242	NCBI Hits Summary
OTU591	Eukaryota;	Eukaryota;SAR;Rhizaria;Cercozoa;Thecofilosea;	Eukaryota;Eukaryota_unclassified;Eukaryota_unclassified;Eukaryota_unclassified;Eukaryota_unclassified;Eukaryota_unclassified	5	1.48867e-05	Cercozoa	AB275046	0.927711	NCBI Hits Summary
OTU593	Unclassified;	Unclassified;	Eukaryota;Dinoflagellata;Dinophyceae;Dinophyceae_unclassified;Dinophyceae_unclassified;Dinophyceae_unclassified	5	9.92447e-06	Dinoflagellata			NCBI Hits Summary
OTU595	Eukaryota;	Eukaryota;SAR;Alveolata;Ciliophora;Intramacronucleata;Spirotrichea;Choreotrichia;	Eukaryota;Ciliophora;Intramacronucleata;Intramacronucleata_unclassified;Intramacronucleata_unclassified;Intramacronucleata_unclassified	5	1.48867e-05	Ciliophora	GU290112	0.915625	NCBI Hits Summary
OTU596	Eukaryota;Haptophyceae;Pavlovales;	Eukaryota;Haptophyta;Pavlovophyceae;	Eukaryota;Pavlovophyceae;Pavlovophyceae_cl;Pavlovophyceae_or;Pavlovophyceae_fa;Pavlovophyceae_fa_unclassified	5	1.98489e-05	Pavlovophyceae	JF714242,JF714243	0.972973,0.972973	NCBI Hits Summary
OTU597	Eukaryota;Stramenopiles;Bacillariophyta;Coscinodiscophyceae;Coscinodiscophycidae;Aulacoseiraceae;Aulacoseira;	Eukaryota;SAR;Stramenopiles;Ochrophyta;Diatomea;Coscinodiscophytina;Melosirids;Aulacoseira;	Eukaryota;Diatomea;Coscinodiscophytina_cl;Coscinodiscophytina_or;Melosirids;Aulacoseira	5	3.47357e-05	Bacillariophyceae	AY121820	0.939394	NCBI Hits Summary
OTU598	Eukaryota;	Eukaryota;Archaeplastida;Chloroplastida;Chlorophyta;Chlorophyceae;	Eukaryota;Chlorophyta_ph;Chlorophyceae;Chlorophyceae_or;Chlorophyceae_fa;Chlorophyceae_ge	5	2.97734e-05	Chlorophyta	AM114821,FR865527,AF514406	0.984756,0.984756,0.966463	NCBI Hits Summary
OTU600	Eukaryota;	Eukaryota;SAR;Alveolata;	Eukaryota;Eukaryota_unclassified;Eukaryota_unclassified;Eukaryota_unclassified;Eukaryota_unclassified;Eukaryota_unclassified	5	9.92447e-06	Eukaryota_unclassified	KC771146,KJ763426,KJ763731,KR535601,KJ760672,KJ762844,KJ762730	0.959877,0.947531,0.947531,0.947531,0.947531,0.947531,0.947531	NCBI Hits Summary
OTU604	Eukaryota;Cryptophyta;Cryptomonadales;Cryptomonadaceae;Cryptomonas;	Eukaryota;Cryptophyceae;Cryptomonadales;Cryptomonas;	Eukaryota;Eukaryota_unclassified;Eukaryota_unclassified;Eukaryota_unclassified;Eukaryota_unclassified;Eukaryota_unclassified	5	9.92447e-06	Cryptophyceae	AM396377,AJ566177,AJ566171,AJ566172,AJ566174	0.911854,0.905775,0.905775,0.905775,0.905775	NCBI Hits Summary
OTU627	Unclassified;	Unclassified;	Eukaryota;Eukaryota_unclassified;Eukaryota_unclassified;Eukaryota_unclassified;Eukaryota_unclassified;Eukaryota_unclassified	5	4.96224e-05	Eukaryota_unclassified			NCBI Hits Summary
OTU637	Unclassified;	Eukaryota;SAR;Stramenopiles;Ochrophyta;Chrysophyceae;	Eukaryota;Ochrophyta_ph;Chrysophyceae;Chrysophyceae_unclassified;Chrysophyceae_unclassified;Chrysophyceae_unclassified	5	2.48112e-05	Chrysophyceae	EF165134,CEOE01007823	0.942073,0.932927	NCBI Hits Summary
OTU657	Eukaryota;environmental samples;	Eukaryota;SAR;Alveolata;Dinoflagellata;	Eukaryota;Dinoflagellata;Dinophyceae;Dinophyceae_unclassified;Dinophyceae_unclassified;Dinophyceae_unclassified	5	1.98489e-05	Dinoflagellata	KJ763588,KJ758039,KJ762789,KJ758066,KJ758256,KJ758217,KJ757867,KJ762844	0.924242,0.924242,0.921212,0.921212,0.921212,0.921212,0.921212,0.921212	NCBI Hits Summary
OTU700	Eukaryota;environmental samples;	Eukaryota;SAR;Alveolata;Dinoflagellata;Dinophyceae;	Eukaryota;Eukaryota_unclassified;Eukaryota_unclassified;Eukaryota_unclassified;Eukaryota_unclassified;Eukaryota_unclassified	5	9.92447e-06	Dinoflagellata	KJ758334,KJ757816,KJ759378,KJ757777	0.903323,0.903323,0.900302,0.900302	NCBI Hits Summary
OTU734	Unclassified;	Unclassified;	Eukaryota;Eukaryota_unclassified;Eukaryota_unclassified;Eukaryota_unclassified;Eukaryota_unclassified;Eukaryota_unclassified	5	2.48112e-05	Eukaryota_unclassified			NCBI Hits Summary
OTU851	Eukaryota;environmental samples;	Eukaryota;SAR;Alveolata;	Eukaryota;Dinoflagellata;Dinophyceae;Gymnodiniphycidae;Gymnodinium_clade;Gymnodinium_clade_unclassified	5	4.96224e-06	Dinoflagellata	KJ758132,KJ758139,KJ758034,KJ759505,KJ757977,KJ758136,DQ103871,KJ757878,KJ763663	0.975232,0.975232,0.975232,0.975232,0.975232,0.975232,0.975232,0.975232,0.975232	NCBI Hits Summary
OTU856	Eukaryota;environmental samples;	Eukaryota;SAR;Alveolata;	Eukaryota;Dinoflagellata;Dinophyceae;Dinophyceae_unclassified;Dinophyceae_unclassified;Dinophyceae_unclassified	5	9.92447e-06	Dinoflagellata	KJ763588,KJ758039,KJ758372,DQ103862,KJ757407	0.972477,0.972477,0.966361,0.966361,0.966361	NCBI Hits Summary
OTU890	Eukaryota;	Eukaryota;SAR;Alveolata;Ciliophora;Intramacronucleata;Spirotrichea;	Eukaryota;Ciliophora;Intramacronucleata;Spirotrichea;Spirotrichea_unclassified;Spirotrichea_unclassified	5	1.98489e-05	Ciliophora	GU290112,KJ760387	0.943925,0.928349	NCBI Hits Summary
OTU901	Eukaryota;	Eukaryota;SAR;Alveolata;	Eukaryota;Dinoflagellata;Dinophyceae;Dinophyceae_unclassified;Dinophyceae_unclassified;Dinophyceae_unclassified	5	9.92447e-06	Dinoflagellata	DQ103862,LK934662,KJ762196,KJ757273,KJ758255,KJ757926,EF058236,JF791060	0.963636,0.963636,0.960606,0.960606,0.960606,0.960606,0.960606,0.960606	NCBI Hits Summary
OTU903	Unclassified;	Eukaryota;SAR;Alveolata;Ciliophora;Intramacronucleata;Spirotrichea;Oligotrichia;	Eukaryota;Ciliophora;Intramacronucleata;Spirotrichea;Oligotrichia;Oligotrichia_unclassified	5	1.98489e-05	Ciliophora	FPLK01000763,FPLK01003043,KJ762027	0.965625,0.965625,0.953125	NCBI Hits Summary
OTU955	Eukaryota;	Eukaryota;SAR;Stramenopiles;Ochrophyta;Diatomea;	Eukaryota;Diatomea;Diatomea_unclassified;Diatomea_unclassified;Diatomea_unclassified;Diatomea_unclassified	5	1.48867e-05	Bacillariophyceae	KP981383,EF423422,AB085831,EF465476,KC771192,KC771163,EF423405	0.911043,0.904908,0.904908,0.904908,0.901841,0.901841,0.901841	NCBI Hits Summary
OTU982	Eukaryota;Viridiplantae;Chlorophyta;Chlorophyceae;Chaetophorales;	Eukaryota;Archaeplastida;Chloroplastida;Chlorophyta;Chlorophyceae;Chaetophorales;	Eukaryota;Chlorophyta_ph;Chlorophyta_ph_unclassified;Chlorophyta_ph_unclassified;Chlorophyta_ph_unclassified;Chlorophyta_ph_unclassified	5	1.98489e-05	Chlorophyta	LN870279	0.916923	NCBI Hits Summary
OTU1016	Unclassified;	Eukaryota;SAR;Stramenopiles;Ochrophyta;Chrysophyceae;	Eukaryota;Ochrophyta_ph;Chrysophyceae;Chrysophyceae_unclassified;Chrysophyceae_unclassified;Chrysophyceae_unclassified	5	2.48112e-05	Chrysophyceae	AF123289,EF165134,CEOE01007823,M55285,MG674910,HAFT01000499	0.93865,0.93865,0.935583,0.932515,0.932515,0.932515	NCBI Hits Summary
OTU1046	Eukaryota;Viridiplantae;Chlorophyta;Ulvophyceae;	Eukaryota;Archaeplastida;Chloroplastida;Chlorophyta;Ulvophyceae;	Eukaryota;Chlorophyta_ph;Ulvophyceae;Ulvophyceae_or;Ulvophyceae_fa;Ulvophyceae_ge	5	2.48112e-05	Chlorophyta	MF034602,Z47996,FR865654,Z28970,MF034601	0.953988,0.953988,0.953988,0.93865,0.93865	NCBI Hits Summary
OTU1063	Eukaryota;environmental samples;	Eukaryota;SAR;Alveolata;	Eukaryota;Eukaryota_unclassified;Eukaryota_unclassified;Eukaryota_unclassified;Eukaryota_unclassified;Eukaryota_unclassified	5	2.48112e-05	Eukaryota_unclassified	KJ758503,KJ757950,KJ762691,KJ762321,KJ763359,KJ759500,KJ763108,HM581708	0.938838,0.929664,0.929664,0.929664,0.929664,0.929664,0.929664,0.929664	NCBI Hits Summary
OTU1070	Eukaryota;Alveolata;Ciliophora;Intramacronucleata;Spirotrichea;Stichotrichia;	Eukaryota;SAR;Alveolata;Ciliophora;Intramacronucleata;Spirotrichea;Hypotrichia;	Eukaryota;Ciliophora;Intramacronucleata;Spirotrichea;Spirotrichea_unclassified;Spirotrichea_unclassified	5	2.48112e-05	Ciliophora	AF508775,AF164684,FJ870072,KF951419,LN869974,KU821589,AF164133	0.925,0.925,0.925,0.921875,0.921875,0.921875,0.921875	NCBI Hits Summary
OTU1074	Eukaryota;environmental samples;	Eukaryota;SAR;Alveolata;	Eukaryota;Eukaryota_unclassified;Eukaryota_unclassified;Eukaryota_unclassified;Eukaryota_unclassified;Eukaryota_unclassified	5	1.98489e-05	Eukaryota_unclassified	KJ758961,JF791060,KJ762571,KJ757273,KJ757950,KJ762196,KJ757926,KJ758050	0.936364,0.933333,0.933333,0.933333,0.933333,0.933333,0.933333,0.933333	NCBI Hits Summary
OTU1101	unclassified sequences;metagenomes;	Eukaryota;Amorphea;Amoebozoa;SAR;Stramenopiles;Labyrinthulomycetes;Sorodiplophrys;	Eukaryota;Eukaryota_unclassified;Eukaryota_unclassified;Eukaryota_unclassified;Eukaryota_unclassified;Eukaryota_unclassified	5	3.47357e-05	Eukaryota_unclassified			NCBI Hits Summary
OTU1107	Eukaryota;	Eukaryota;SAR;Alveolata;	Eukaryota;Dinoflagellata;Dinophyceae;Dinophyceae_unclassified;Dinophyceae_unclassified;Dinophyceae_unclassified	5	2.97734e-05	Dinoflagellata	JN090875,AY121856,KJ757407,KJ757312,KJ762951,AY590477,KJ758256	0.969697,0.960606,0.960606,0.957576,0.957576,0.957576,0.957576	NCBI Hits Summary
OTU1181	Eukaryota;	Eukaryota;SAR;Stramenopiles;Ochrophyta;	Eukaryota;Ochrophyta_ph;Ochrophyta_ph_unclassified;Ochrophyta_ph_unclassified;Ochrophyta_ph_unclassified;Ochrophyta_ph_unclassified	5	1.98489e-05	Ochrophyta_ph_unclassified	AF045042,GQ122355	0.934985,0.934985	NCBI Hits Summary
OTU1196	Eukaryota;environmental samples;	Eukaryota;SAR;Stramenopiles;Ochrophyta;Diatomea;Bacillariophytina;Bacillariophyceae;	Eukaryota;Diatomea;Diatomea_unclassified;Diatomea_unclassified;Diatomea_unclassified;Diatomea_unclassified	5	1.48867e-05	Bacillariophyceae	KJ758343,KJ757998,KJ758212,KJ757918,KC771155,KJ758375,KC771168,AJ867279	0.951807,0.951807,0.951807,0.951807,0.951807,0.951807,0.948795,0.948795	NCBI Hits Summary
OTU1224	Eukaryota;	Eukaryota;SAR;Alveolata;	Eukaryota;Dinoflagellata;Dinophyceae;Dinophyceae_unclassified;Dinophyceae_unclassified;Dinophyceae_unclassified	5	1.48867e-05	Dinoflagellata	KC771146,AY251288,DQ103862	0.966565,0.957447,0.957447	NCBI Hits Summary
OTU1232	Eukaryota;	Eukaryota;SAR;Alveolata;Dinoflagellata;Dinophyceae;	Eukaryota;Dinoflagellata;Dinophyceae;Dinophyceae_unclassified;Dinophyceae_unclassified;Dinophyceae_unclassified	5	2.48112e-05	Dinoflagellata	AY121856,KC771146,FN557541,AY251288,JN090875,AY245689,DQ103862	0.963415,0.963415,0.963415,0.963415,0.960366,0.960366,0.957317	NCBI Hits Summary
OTU1274	Eukaryota;Viridiplantae;Chlorophyta;	Eukaryota;Archaeplastida;Chloroplastida;Chlorophyta;	Eukaryota;Chlorophyta_ph;Chlorophyta_ph_unclassified;Chlorophyta_ph_unclassified;Chlorophyta_ph_unclassified;Chlorophyta_ph_unclassified	5	9.92447e-06	Chlorophyta	AB080305,AB080306	0.957576,0.942424	NCBI Hits Summary
OTU1276	Eukaryota;Stramenopiles;	Eukaryota;SAR;Stramenopiles;Ochrophyta;Eustigmatophyceae;Eustigmatales;Nannochloropsis;	Eukaryota;Ochrophyta_ph;Eustigmatophyceae;Eustigmatales;Eustigmatales_fa;Nannochloropsis	5	9.92447e-06	Eustigmatophyceae	GQ122355,AF045042,FJ153674	0.962963,0.962963,0.959877	NCBI Hits Summary
OTU540	Eukaryota;Fungi;	Eukaryota;Amorphea;Obazoa;Opisthokonta;Nucletmycea;Fungi;Chytridiomycota;Incertae Sedis;Chytridiomycetes;	Eukaryota;Chytridiomycota;Chytridiomycetes;uncultured;uncultured_fa;uncultured_ge	4	1.98489e-05	Chytridiomycota	DQ244009	0.981818	NCBI Hits Summary
OTU576	Unclassified;	Unclassified;	Eukaryota;Eukaryota_unclassified;Eukaryota_unclassified;Eukaryota_unclassified;Eukaryota_unclassified;Eukaryota_unclassified	4	4.96224e-06	Eukaryota_unclassified			NCBI Hits Summary
OTU605	Unclassified;	Unclassified;	Eukaryota;Eukaryota_unclassified;Eukaryota_unclassified;Eukaryota_unclassified;Eukaryota_unclassified;Eukaryota_unclassified	4	1.48867e-05	Eukaryota_unclassified			NCBI Hits Summary
OTU614	Eukaryota;Stramenopiles;Bacillariophyta;Fragilariophyceae;Fragilariophycidae;	Eukaryota;SAR;Stramenopiles;Ochrophyta;Diatomea;Coscinodiscophytina;Fragilariales;	Eukaryota;Diatomea;Coscinodiscophytina_cl;Fragilariales;Fragilariales_fa;Ulnaria	4	2.97734e-05	Bacillariophyceae	EF423422,EF465476	0.938838,0.938838	NCBI Hits Summary
OTU615	Eukaryota;Stramenopiles;	Eukaryota;SAR;Stramenopiles;Ochrophyta;Chrysophyceae;	Eukaryota;Ochrophyta_ph;Chrysophyceae;Chrysophyceae_unclassified;Chrysophyceae_unclassified;Chrysophyceae_unclassified	4	1.48867e-05	Chrysophyceae	M87332	0.942073	NCBI Hits Summary
OTU619	Eukaryota;Alveolata;Ciliophora;	Eukaryota;SAR;Alveolata;Ciliophora;Intramacronucleata;Litostomatea;Haptoria;	Eukaryota;Ciliophora;Intramacronucleata;Litostomatea;Haptoria;Haptoria_unclassified	4	1.48867e-05	Ciliophora	MF474345,AY180028,HM140391,DQ777746,LN869967,MF474344	0.97351,0.97351,0.97351,0.970199,0.970199,0.966887	NCBI Hits Summary
OTU620	Eukaryota;environmental samples;	Eukaryota;SAR;Alveolata;	Eukaryota;Dinoflagellata;Dinophyceae;Dinophyceae_unclassified;Dinophyceae_unclassified;Dinophyceae_unclassified	4	1.98489e-05	Dinoflagellata	KJ759500,KJ762691,KJ759639,KJ762900,KJ757950,KJ763031,KJ762932,KJ762858,KJ763108	0.946032,0.946032,0.946032,0.946032,0.946032,0.946032,0.946032,0.946032,0.946032	NCBI Hits Summary
OTU621	Eukaryota;Stramenopiles;Bacillariophyta;Fragilariophyceae;Fragilariophycidae;	Eukaryota;SAR;Stramenopiles;Ochrophyta;Diatomea;Coscinodiscophytina;Fragilariales;Fragilaria;	Eukaryota;Diatomea;Coscinodiscophytina_cl;Fragilariales;Fragilariales_fa;Fragilariales_fa_unclassified	4	1.48867e-05	Bacillariophyceae	AM497722,AJ535137,EF465469,EF465478,AM497738,EF423405,AM497721	0.95107,0.95107,0.95107,0.95107,0.95107,0.948012,0.948012	NCBI Hits Summary
OTU622	Eukaryota;Viridiplantae;Chlorophyta;Ulvophyceae;	Eukaryota;Archaeplastida;Chloroplastida;Chlorophyta;Ulvophyceae;	Eukaryota;Eukaryota_unclassified;Eukaryota_unclassified;Eukaryota_unclassified;Eukaryota_unclassified;Eukaryota_unclassified	4	1.48867e-05	Chlorophyta	Z47996,FR865654,MF034602,MF034647,MF034601	0.944954,0.944954,0.944954,0.929664,0.929664	NCBI Hits Summary
OTU624	Unclassified;	Unclassified;	Eukaryota;Eukaryota_unclassified;Eukaryota_unclassified;Eukaryota_unclassified;Eukaryota_unclassified;Eukaryota_unclassified	4	2.48112e-05	Eukaryota_unclassified			NCBI Hits Summary
OTU628	Unclassified;	Eukaryota;SAR;Rhizaria;Cercozoa;Thecofilosea;	Eukaryota;Cercozoa;Cercozoa_unclassified;Cercozoa_unclassified;Cercozoa_unclassified;Cercozoa_unclassified	4	2.48112e-05	Cercozoa	EF526980	0.9279	NCBI Hits Summary
OTU629	unclassified sequences;metagenomes;	Eukaryota;Amorphea;Amoebozoa;SAR;Stramenopiles;Labyrinthulomycetes;Sorodiplophrys;	Eukaryota;Eukaryota_unclassified;Eukaryota_unclassified;Eukaryota_unclassified;Eukaryota_unclassified;Eukaryota_unclassified	4	1.48867e-05	Eukaryota_unclassified			NCBI Hits Summary
OTU630	Unclassified;	Unclassified;	Eukaryota;Eukaryota_unclassified;Eukaryota_unclassified;Eukaryota_unclassified;Eukaryota_unclassified;Eukaryota_unclassified	4	1.98489e-05	Eukaryota_unclassified			NCBI Hits Summary
OTU632	Eukaryota;Viridiplantae;Chlorophyta;	Eukaryota;Archaeplastida;Chloroplastida;Chlorophyta;Ulvophyceae;	Eukaryota;Eukaryota_unclassified;Eukaryota_unclassified;Eukaryota_unclassified;Eukaryota_unclassified;Eukaryota_unclassified	4	1.48867e-05	Chlorophyta	FR865654,Z47996,MF034602,MF034601,Z28970	0.95092,0.95092,0.95092,0.935583,0.935583	NCBI Hits Summary
OTU633	Eukaryota;	Eukaryota;SAR;Stramenopiles;Ochrophyta;Chrysophyceae;	Eukaryota;Ochrophyta_ph;Chrysophyceae;Chrysophyceae_unclassified;Chrysophyceae_unclassified;Chrysophyceae_unclassified	4	1.48867e-05	Chrysophyceae	AB520723,EF185316	0.935976,0.932927	NCBI Hits Summary
OTU634	Unclassified;	Eukaryota;SAR;Alveolata;Ciliophora;Intramacronucleata;Conthreep;Prostomatea;Cryptocaryon;	Eukaryota;Ciliophora;Intramacronucleata;Conthreep;Conthreep_unclassified;Conthreep_unclassified	4	1.98489e-05	Ciliophora	FPLK01002332,KU743843	0.975078,0.934579	NCBI Hits Summary
OTU636	Eukaryota;environmental samples;	Eukaryota;SAR;Alveolata;Apicomplexa;Conoidasida;Gregarinasina;	Eukaryota;Eukaryota_unclassified;Eukaryota_unclassified;Eukaryota_unclassified;Eukaryota_unclassified;Eukaryota_unclassified	4	2.48112e-05	Eukaryota_unclassified			NCBI Hits Summary
OTU639	Eukaryota;Viridiplantae;Chlorophyta;Chlorophyceae;Sphaeropleales;Scenedesmaceae;	Eukaryota;Archaeplastida;Chloroplastida;Chlorophyta;Chlorophyceae;	Eukaryota;Chlorophyta_ph;Chlorophyceae;Chlorophyceae_or;Chlorophyceae_fa;Chlorophyceae_ge	4	1.48867e-05	Chlorophyta	KF864474,KF144195	1,1	NCBI Hits Summary
OTU640	Eukaryota;environmental samples;	Eukaryota;SAR;Alveolata;	Eukaryota;Dinoflagellata;Dinophyceae;Dinophyceae_unclassified;Dinophyceae_unclassified;Dinophyceae_unclassified	4	1.98489e-05	Dinoflagellata	KJ763359,KJ759500,KJ759639,KJ757950,KJ763108,KJ763031,KJ762932,KJ762908,KJ762900	0.947368,0.947368,0.947368,0.947368,0.947368,0.947368,0.947368,0.947368,0.947368	NCBI Hits Summary
OTU641	Unclassified;	Eukaryota;SAR;Stramenopiles;Ochrophyta;Chrysophyceae;	Eukaryota;Ochrophyta_ph;Chrysophyceae;Chrysophyceae_unclassified;Chrysophyceae_unclassified;Chrysophyceae_unclassified	4	1.98489e-05	Chrysophyceae	FPLS01003729,AY642705	0.963415,0.954268	NCBI Hits Summary
OTU643	Unclassified;	Unclassified;	Eukaryota;Eukaryota_unclassified;Eukaryota_unclassified;Eukaryota_unclassified;Eukaryota_unclassified;Eukaryota_unclassified	4	1.48867e-05	Eukaryota_unclassified			NCBI Hits Summary
OTU644	Eukaryota;environmental samples;	Eukaryota;SAR;Alveolata;	Eukaryota;Eukaryota_unclassified;Eukaryota_unclassified;Eukaryota_unclassified;Eukaryota_unclassified;Eukaryota_unclassified	4	2.48112e-05	Eukaryota_unclassified	KJ762691,KJ757950,KJ759469,KJ758000,KJ763359,KJ763108,KJ762900,KJ763031	0.920245,0.920245,0.917178,0.917178,0.917178,0.917178,0.917178,0.917178	NCBI Hits Summary
OTU646	Eukaryota;Rhizaria;Cercozoa;environmental samples;	Eukaryota;SAR;Rhizaria;Cercozoa;Novel Clade 10;	Eukaryota;Eukaryota_unclassified;Eukaryota_unclassified;Eukaryota_unclassified;Eukaryota_unclassified;Eukaryota_unclassified	4	1.98489e-05	Cercozoa			NCBI Hits Summary
OTU648	Unclassified;	Unclassified;	Eukaryota;Eukaryota_unclassified;Eukaryota_unclassified;Eukaryota_unclassified;Eukaryota_unclassified;Eukaryota_unclassified	4	2.48112e-05	Eukaryota_unclassified			NCBI Hits Summary
OTU649	Eukaryota;	Eukaryota;SAR;Alveolata;Dinoflagellata;Dinophyceae;Peridiniphycidae;Thoracosphaeraceae;	Eukaryota;Dinoflagellata;Dinophyceae;Peridiniphycidae_or;Thoracosphaeraceae;Thoracosphaeraceae_ge	4	1.98489e-05	Dinoflagellata	JN090875,GU290116	0.931035,0.91954	NCBI Hits Summary
OTU650	Eukaryota;	Eukaryota;SAR;Alveolata;Ciliophora;Intramacronucleata;Spirotrichea;Choreotrichia;	Eukaryota;Ciliophora;Intramacronucleata;Spirotrichea;Choreotrichia;Choreotrichia_unclassified	4	1.98489e-05	Ciliophora	EU162620,JX567491,DQ487200,KJ758267,JX178773,AY665055,KJ757131	0.946032,0.91746,0.91746,0.91746,0.91746,0.91746,0.91746	NCBI Hits Summary
OTU651	Unclassified;	Eukaryota;Amorphea;Amoebozoa;Centrohelida;	Eukaryota;Eukaryota_unclassified;Eukaryota_unclassified;Eukaryota_unclassified;Eukaryota_unclassified;Eukaryota_unclassified	4	1.98489e-05	Eukaryota_unclassified	FPLS01045501	0.942771	NCBI Hits Summary
OTU652	Unclassified;	Unclassified;	Eukaryota;Eukaryota_unclassified;Eukaryota_unclassified;Eukaryota_unclassified;Eukaryota_unclassified;Eukaryota_unclassified	4	1.98489e-05	Eukaryota_unclassified			NCBI Hits Summary
OTU655	Unclassified;	Unclassified;	Eukaryota;Eukaryota_unclassified;Eukaryota_unclassified;Eukaryota_unclassified;Eukaryota_unclassified;Eukaryota_unclassified	4	1.48867e-05	Eukaryota_unclassified			NCBI Hits Summary
OTU659	Eukaryota;	Eukaryota;SAR;Alveolata;Ciliophora;Intramacronucleata;Spirotrichea;Hypotrichia;	Eukaryota;Ciliophora;Intramacronucleata;Spirotrichea;Hypotrichia;Halteria	4	9.92447e-06	Ciliophora	GU067965,DQ244040	0.990683,0.990683	NCBI Hits Summary
OTU660	Unclassified;	Unclassified;	Eukaryota;Eukaryota_unclassified;Eukaryota_unclassified;Eukaryota_unclassified;Eukaryota_unclassified;Eukaryota_unclassified	4	9.92447e-06	Eukaryota_unclassified			NCBI Hits Summary
OTU661	Unclassified;	Unclassified;	Eukaryota;Eukaryota_unclassified;Eukaryota_unclassified;Eukaryota_unclassified;Eukaryota_unclassified;Eukaryota_unclassified	4	9.92447e-06	Eukaryota_unclassified			NCBI Hits Summary
OTU663	Eukaryota;Viridiplantae;Chlorophyta;	Eukaryota;Archaeplastida;Chloroplastida;Chlorophyta;Chlorophyceae;	Eukaryota;Chlorophyta_ph;Chlorophyta_ph_unclassified;Chlorophyta_ph_unclassified;Chlorophyta_ph_unclassified;Chlorophyta_ph_unclassified	4	2.48112e-05	Chlorophyta	AB058373	0.954268	NCBI Hits Summary
OTU664	Eukaryota;	Eukaryota;SAR;Stramenopiles;Peronosporomycetes;	Eukaryota;Peronosporomycetes;Peronosporomycetes_cl;Peronosporomycetes_or;Peronosporomycetes_fa;uncultured	4	9.92447e-06	Peronosporomycetes	AB902023,AATU01005887,AATU01005887,AATU01005887,AATU01005952,AATU01005879,AATU01005887,AATU01005943	0.993976,0.978916,0.978916,0.978916,0.978916,0.978916,0.978916,0.978916	NCBI Hits Summary
OTU666	Eukaryota;Viridiplantae;Chlorophyta;Chlorophyceae;Chlamydomonadales;	Eukaryota;Archaeplastida;Chloroplastida;Chlorophyta;Chlorophyceae;	Eukaryota;Chlorophyta_ph;Chlorophyceae;Chlorophyceae_unclassified;Chlorophyceae_unclassified;Chlorophyceae_unclassified	4	9.92447e-06	Chlorophyta	JQ315516	0.97561	NCBI Hits Summary
OTU667	Unclassified;	Unclassified;	Eukaryota;Eukaryota_unclassified;Eukaryota_unclassified;Eukaryota_unclassified;Eukaryota_unclassified;Eukaryota_unclassified	4	1.48867e-05	Eukaryota_unclassified			NCBI Hits Summary
OTU668	Eukaryota;Haptophyceae;Pavlovales;	Eukaryota;Haptophyta;Pavlovophyceae;	Eukaryota;Pavlovophyceae;Pavlovophyceae_cl;Pavlovophyceae_or;Pavlovophyceae_fa;Pavlovophyceae_fa_unclassified	4	9.92447e-06	Pavlovophyceae	EU247835,AF106056	0.984848,0.969697	NCBI Hits Summary
OTU669	Eukaryota;Fungi;Dikarya;Basidiomycota;Agaricomycotina;Tremellomycetes;	Eukaryota;Amorphea;Obazoa;Opisthokonta;Nucletmycea;Fungi;Dikarya;Basidiomycota;Agaricomycotina;Tremellomycetes;Tremellales;	Eukaryota;Basidiomycota;Tremellomycetes;Tremellales;Bulleribasidiaceae;Vishniacozyma	4	1.48867e-05	Basidiomycota	KM586996,AB085798,DQ645520,AB085800,KU359449,AB032627,AB032645	0.993976,0.993976,0.993976,0.978916,0.975904,0.975904,0.975904	NCBI Hits Summary
OTU670	Eukaryota;Stramenopiles;Bacillariophyta;Fragilariophyceae;Fragilariophycidae;	Eukaryota;SAR;Stramenopiles;Ochrophyta;Diatomea;	Eukaryota;Diatomea;Bacillariophyceae;Bacillariophyceae_or;Bacillariophyceae_fa;Diatoma	4	1.48867e-05	Bacillariophyceae	EF465465,EF423403,AY633758,EF465474	0.969512,0.969512,0.960366,0.960366	NCBI Hits Summary
OTU672	Eukaryota;Stramenopiles;Bacillariophyta;Bacillariophyceae;Bacillariophycidae;Cymbellales;Gomphonemataceae;Gomphonema;	Eukaryota;SAR;Stramenopiles;Ochrophyta;Diatomea;Bacillariophytina;Bacillariophyceae;Gomphonema;	Eukaryota;Diatomea;Bacillariophyceae;Bacillariophyceae_or;Bacillariophyceae_fa;Gomphonema	4	9.92447e-06	Bacillariophyceae	AM502005	0.93578	NCBI Hits Summary
OTU673	Eukaryota;Viridiplantae;Chlorophyta;Chlorophyceae;Chlamydomonadales;	Eukaryota;Archaeplastida;Chloroplastida;Chlorophyta;Chlorophyceae;	Eukaryota;Chlorophyta_ph;Chlorophyceae;Chlorophyceae_or;Chlorophyceae_fa;Chlorophyceae_ge	4	1.48867e-05	Chlorophyta	AB542921,MF101220,AY731083	0.957317,0.951219,0.951219	NCBI Hits Summary
OTU674	Unclassified;	Unclassified;	Eukaryota;Eukaryota_unclassified;Eukaryota_unclassified;Eukaryota_unclassified;Eukaryota_unclassified;Eukaryota_unclassified	4	1.48867e-05	Eukaryota_unclassified			NCBI Hits Summary
OTU675	Eukaryota;	Eukaryota;SAR;Stramenopiles;Ochrophyta;Diatomea;	Eukaryota;Diatomea;Diatomea_unclassified;Diatomea_unclassified;Diatomea_unclassified;Diatomea_unclassified	4	1.48867e-05	Bacillariophyceae	KC771178,JX401239,AM497725,AJ867279,EF432527,AY633758,EF423409	0.929878,0.926829,0.923781,0.923781,0.923781,0.923781,0.923781	NCBI Hits Summary
OTU676	Eukaryota;Stramenopiles;Bacillariophyta;Bacillariophyceae;Bacillariophycidae;	Eukaryota;SAR;Stramenopiles;Ochrophyta;Diatomea;Bacillariophytina;Bacillariophyceae;	Eukaryota;Diatomea;Bacillariophyceae;Bacillariophyceae_or;Bacillariophyceae_fa;Cymbopleura	4	9.92447e-06	Bacillariophyceae	AM502004,GU067830,AM501961	0.93578,0.923547,0.920489	NCBI Hits Summary
OTU678	Eukaryota;Fungi;Dikarya;Basidiomycota;Agaricomycotina;Tremellomycetes;Cystofilobasidiales;Mrakiaceae;	Eukaryota;Amorphea;Obazoa;Opisthokonta;Nucletmycea;Fungi;Dikarya;Basidiomycota;Agaricomycotina;	Eukaryota;Basidiomycota;Tremellomycetes;Cystofilobasidiales;Mrakiaceae;Mrakia	4	1.48867e-05	Basidiomycota	BBPU01000044,D12802,JUBC01000926,DQ831017,AB032665	1,1,1,1,1	NCBI Hits Summary
OTU679	Unclassified;	Eukaryota;Amorphea;Amoebozoa;Centrohelida;	Eukaryota;Eukaryota_unclassified;Eukaryota_unclassified;Eukaryota_unclassified;Eukaryota_unclassified;Eukaryota_unclassified	4	2.48112e-05	Eukaryota_unclassified	AY268043,FPLS01033110	0.943114,0.931138	NCBI Hits Summary
OTU681	Eukaryota;Amoebozoa;Tubulinea;Arcellinida;Arcellina;Arcellidae;Arcella;	Eukaryota;Amorphea;Amoebozoa;Tubulinea;Arcellinida;Arcellina;Arcella;	Eukaryota;Eukaryota_unclassified;Eukaryota_unclassified;Eukaryota_unclassified;Eukaryota_unclassified;Eukaryota_unclassified	4	1.48867e-05	Eukaryota_unclassified			NCBI Hits Summary
OTU684	Eukaryota;Stramenopiles;	Eukaryota;SAR;Stramenopiles;Ochrophyta;Diatomea;	Eukaryota;Diatomea;Bacillariophyceae;Bacillariophyceae_or;Bacillariophyceae_fa;Neidium	4	1.98489e-05	Bacillariophyceae	HQ912582,HQ912583	0.92284,0.92284	NCBI Hits Summary
OTU687	Eukaryota;environmental samples;	Eukaryota;SAR;Alveolata;	Eukaryota;Dinoflagellata;Dinophyceae;Gymnodiniphycidae;Gymnodinium_clade;Gymnodinium_clade_unclassified	4	9.92447e-06	Dinoflagellata	DQ103871,KJ758547,KJ759537,KJ757985,KJ758254,KJ759489,AF022196,DQ103860	0.954268,0.954268,0.951219,0.951219,0.951219,0.951219,0.951219,0.951219	NCBI Hits Summary
OTU689	Eukaryota;Fungi;Dikarya;Ascomycota;Taphrinomycotina;Taphrinomycetes;Taphrinales;Taphrinaceae;Taphrina;	Eukaryota;Amorphea;Obazoa;Opisthokonta;Nucletmycea;Fungi;Dikarya;Ascomycota;Taphrinomycotina;Taphrinomycetes;Taphrinales;Taphrinaceae;Taphrina;	Eukaryota;Ascomycota;Taphrinomycetes;Taphrinales;Taphrinaceae;Taphrina	4	1.98489e-05	Ascomycota	AB000948,U00971,AJ495826,AJ495830	1,0.990991,0.990991,0.990991	NCBI Hits Summary
OTU693	Unclassified;	Unclassified;	Eukaryota;Eukaryota_unclassified;Eukaryota_unclassified;Eukaryota_unclassified;Eukaryota_unclassified;Eukaryota_unclassified	4	4.96224e-06	Eukaryota_unclassified			NCBI Hits Summary
OTU694	Unclassified;	Unclassified;	Eukaryota;Eukaryota_unclassified;Eukaryota_unclassified;Eukaryota_unclassified;Eukaryota_unclassified;Eukaryota_unclassified	4	2.97734e-05	Eukaryota_unclassified			NCBI Hits Summary
OTU696	Unclassified;	Unclassified;	Eukaryota;Eukaryota_unclassified;Eukaryota_unclassified;Eukaryota_unclassified;Eukaryota_unclassified;Eukaryota_unclassified	4	2.48112e-05	Eukaryota_unclassified			NCBI Hits Summary
OTU699	Eukaryota;environmental samples;	Eukaryota;SAR;Stramenopiles;Ochrophyta;Bolidomonas;	Eukaryota;Eukaryota_unclassified;Eukaryota_unclassified;Eukaryota_unclassified;Eukaryota_unclassified;Eukaryota_unclassified	4	9.92447e-06	Eukaryota_unclassified	AY919761	0.915408	NCBI Hits Summary
OTU712	Unclassified;	Unclassified;	Eukaryota;Euglenozoa;Euglenida;Euglenida_unclassified;Euglenida_unclassified;Euglenida_unclassified	4	9.92447e-06	Euglenida			NCBI Hits Summary
OTU713	Unclassified;	Unclassified;	Eukaryota;Eukaryota_unclassified;Eukaryota_unclassified;Eukaryota_unclassified;Eukaryota_unclassified;Eukaryota_unclassified	4	9.92447e-06	Eukaryota_unclassified			NCBI Hits Summary
OTU714	Eukaryota;environmental samples;	Eukaryota;Cryptophyceae;	Eukaryota;Eukaryota_unclassified;Eukaryota_unclassified;Eukaryota_unclassified;Eukaryota_unclassified;Eukaryota_unclassified	4	9.92447e-06	Cryptophyceae	GU290075,AY642699	0.947368,0.93808	NCBI Hits Summary
OTU750	Eukaryota;environmental samples;	Eukaryota;SAR;Alveolata;	Eukaryota;Dinoflagellata;Dinoflagellata_unclassified;Dinoflagellata_unclassified;Dinoflagellata_unclassified;Dinoflagellata_unclassified	4	2.48112e-05	Dinoflagellata	KJ762571,KJ757926,KJ762196,KJ757662,KJ757673,KJ762277,KJ758050,KJ758255	0.927273,0.927273,0.927273,0.924242,0.924242,0.924242,0.924242,0.924242	NCBI Hits Summary
OTU753	Eukaryota;Stramenopiles;	Eukaryota;SAR;Stramenopiles;Ochrophyta;Diatomea;Bacillariophytina;Mediophyceae;Thalassiosira;	Eukaryota;Diatomea;Mediophyceae;Mediophyceae_or;Mediophyceae_fa;Mediophyceae_fa_unclassified	4	1.98489e-05	Bacillariophyceae	AM050629,DQ093366,AB831890,JQ781887,JQ782074	0.960725,0.957704,0.954683,0.954683,0.954683	NCBI Hits Summary
OTU761	Eukaryota;Alveolata;Ciliophora;Intramacronucleata;Spirotrichea;Choreotrichia;Tintinnida;	Eukaryota;SAR;Alveolata;Ciliophora;Intramacronucleata;Spirotrichea;Choreotrichia;	Eukaryota;Ciliophora;Intramacronucleata;Spirotrichea;Choreotrichia;Codonellopsis	4	1.98489e-05	Ciliophora	EU399541,KF662622	0.968652,0.959248	NCBI Hits Summary
OTU801	Eukaryota;Viridiplantae;Chlorophyta;Chlorophyceae;Chlamydomonadales;	Eukaryota;Archaeplastida;Chloroplastida;Chlorophyta;Chlorophyceae;Chlamydomonadales;	Eukaryota;Chlorophyta_ph;Chlorophyceae;Chlorophyceae_or;Chlorophyceae_fa;Chlorophyceae_ge	4	1.48867e-05	Chlorophyta	KM020018,FR854385	0.948171,0.942073	NCBI Hits Summary
OTU823	Eukaryota;Stramenopiles;Bacillariophyta;	Eukaryota;SAR;Stramenopiles;Ochrophyta;Diatomea;	Eukaryota;Diatomea;Diatomea_unclassified;Diatomea_unclassified;Diatomea_unclassified;Diatomea_unclassified	4	1.48867e-05	Bacillariophyceae	EF465465,AM497725,EF465466,EF423403,M87325	0.939024,0.939024,0.935976,0.935976,0.935976	NCBI Hits Summary
OTU853	Eukaryota;environmental samples;	Eukaryota;SAR;Alveolata;	Eukaryota;Dinoflagellata;Dinophyceae;Gymnodiniphycidae;Gymnodinium_clade;Gymnodinium_clade_unclassified	4	9.92447e-06	Dinoflagellata	KJ758547,DQ103871,KJ757985,DQ103860,KJ758214,EF526865,KJ759537,AF022196	0.930303,0.930303,0.927273,0.927273,0.927273,0.927273,0.927273,0.927273	NCBI Hits Summary
OTU860	Eukaryota;	Eukaryota;SAR;Alveolata;Ciliophora;Intramacronucleata;Litostomatea;	Eukaryota;Ciliophora;Intramacronucleata;Litostomatea;Haptoria;Didinium	4	2.97734e-05	Ciliophora	KX465195	0.976821	NCBI Hits Summary
OTU871	Eukaryota;	Eukaryota;SAR;Stramenopiles;Ochrophyta;Diatomea;Bacillariophytina;Bacillariophyceae;	Eukaryota;Diatomea;Bacillariophyceae;Bacillariophyceae_or;Bacillariophyceae_fa;Bacillariophyceae_fa_unclassified	4	1.48867e-05	Bacillariophyceae	AJ867279,KC771171,KC771164,HM805036,KC771191,JF791075,KC771177,AY485457	0.972561,0.972561,0.972561,0.972561,0.972561,0.972561,0.972561,0.969512	NCBI Hits Summary
OTU880	Eukaryota;	Eukaryota;SAR;Alveolata;	Eukaryota;Dinoflagellata;Dinophyceae;Dinophyceae_unclassified;Dinophyceae_unclassified;Dinophyceae_unclassified	4	1.48867e-05	Dinoflagellata	KC771146,KJ763731,KJ758116,KJ760672,KR535601,KJ763230,KJ763426	0.945455,0.933333,0.933333,0.933333,0.933333,0.933333,0.933333	NCBI Hits Summary
OTU934	Eukaryota;environmental samples;	Eukaryota;SAR;Alveolata;	Eukaryota;Dinoflagellata;Dinophyceae;Dinophyceae_unclassified;Dinophyceae_unclassified;Dinophyceae_unclassified	4	9.92447e-06	Dinoflagellata	KJ758039,KJ763588,KJ762789,KJ757407,KJ758372,KJ757956	0.951515,0.951515,0.948485,0.945455,0.945455,0.945455	NCBI Hits Summary
OTU986	Eukaryota;	Eukaryota;SAR;Alveolata;Ciliophora;Intramacronucleata;Spirotrichea;	Eukaryota;Ciliophora;Intramacronucleata;Spirotrichea;Spirotrichea_unclassified;Spirotrichea_unclassified	4	1.98489e-05	Ciliophora	GU067819,GU290112	0.903727,0.900621	NCBI Hits Summary
OTU1021	Eukaryota;Viridiplantae;Streptophyta;Embryophyta;Tracheophyta;Spermatophyta;Pinidae;Pinales;Pinaceae;Pinus;Pinus;	Eukaryota;Archaeplastida;Chloroplastida;Charophyta;Phragmoplastophyta;Streptophyta;Embryophyta;Tracheophyta;Spermatophyta;Pinophyta;Pinales;Pinus;	Eukaryota;Phragmoplastophyta;Embryophyta;Pinophyta_or;Pinophyta_fa;Pinophyta_ge	4	1.98489e-05	Embryophyta	APFE031541527,APFE031679979,APFE030179160,APFE031454343,APFE030268033,GFLL01048585,APFE031567259,APFE031333456	0.970149,0.970149,0.970149,0.970149,0.970149,0.967164,0.967164,0.967164	NCBI Hits Summary
OTU1049	Eukaryota;Alveolata;Ciliophora;Intramacronucleata;Litostomatea;Haptoria;Pleurostomatida;	Eukaryota;SAR;Alveolata;Ciliophora;Intramacronucleata;Litostomatea;Haptoria;	Eukaryota;Ciliophora;Intramacronucleata;Litostomatea;Haptoria;Haptoria_unclassified	4	1.98489e-05	Ciliophora	FJ875149,FJ875147,DQ190465,KC469985,FPLS01013121	0.9701,0.966777,0.966777,0.966777,0.966777	NCBI Hits Summary
OTU1056	Eukaryota;Stramenopiles;Bacillariophyta;Fragilariophyceae;Fragilariophycidae;	Eukaryota;SAR;Stramenopiles;Ochrophyta;Diatomea;	Eukaryota;Diatomea;Diatomea_unclassified;Diatomea_unclassified;Diatomea_unclassified;Diatomea_unclassified	4	2.48112e-05	Bacillariophyceae	EF465465,EF465474,JX401234,EF423403,AB085829,FM164376	0.944954,0.941896,0.941896,0.941896,0.938838,0.938838	NCBI Hits Summary
OTU1061	Eukaryota;Viridiplantae;Chlorophyta;Ulvophyceae;	Eukaryota;Archaeplastida;Chloroplastida;Chlorophyta;Ulvophyceae;	Eukaryota;Chlorophyta_ph;Ulvophyceae;Ulvophyceae_or;Ulvophyceae_fa;Ulvophyceae_ge	4	1.98489e-05	Chlorophyta	Z47996,FR865654	0.957055,0.957055	NCBI Hits Summary
OTU1065	Eukaryota;Alveolata;	Eukaryota;SAR;Alveolata;Ciliophora;Intramacronucleata;Spirotrichea;Hypotrichia;	Eukaryota;Ciliophora;Intramacronucleata;Spirotrichea;Hypotrichia;Hypotrichia_unclassified	4	1.98489e-05	Ciliophora	AF508769,AB695452,JX139117,AF164125,AY179978,KR701611,KU821589	0.946203,0.939873,0.939873,0.939873,0.939873,0.939873,0.939873	NCBI Hits Summary
OTU1124	Eukaryota;Stramenopiles;Bacillariophyta;Fragilariophyceae;Fragilariophycidae;	Eukaryota;SAR;Stramenopiles;Ochrophyta;Diatomea;	Eukaryota;Diatomea;Bacillariophyceae;Bacillariophyceae_or;Bacillariophyceae_fa;Diatoma	4	9.92447e-06	Bacillariophyceae	EF423403	0.969512	NCBI Hits Summary
OTU1126	Eukaryota;	Eukaryota;SAR;Stramenopiles;Ochrophyta;Diatomea;Bacillariophytina;Bacillariophyceae;	Eukaryota;Diatomea;Diatomea_unclassified;Diatomea_unclassified;Diatomea_unclassified;Diatomea_unclassified	4	1.48867e-05	Bacillariophyceae	EF465465,AY633758,EF423403	0.94864,0.945619,0.942598	NCBI Hits Summary
OTU1158	Eukaryota;	Eukaryota;Amorphea;Obazoa;Opisthokonta;Nucletmycea;Fungi;Cryptomycota;LKM11;	Eukaryota;Eukaryota_unclassified;Eukaryota_unclassified;Eukaryota_unclassified;Eukaryota_unclassified;Eukaryota_unclassified	4	1.48867e-05	Cryptomycota	FM178232	0.963526	NCBI Hits Summary
OTU1256	Eukaryota;Stramenopiles;Bacillariophyta;Coscinodiscophyceae;Coscinodiscophycidae;Aulacoseiraceae;Aulacoseira;	Eukaryota;SAR;Stramenopiles;Ochrophyta;Diatomea;Coscinodiscophytina;Melosirids;Aulacoseira;	Eukaryota;Diatomea;Coscinodiscophytina_cl;Coscinodiscophytina_or;Melosirids;Aulacoseira	4	2.48112e-05	Bacillariophyceae	AY121820	0.957576	NCBI Hits Summary
OTU535	Eukaryota;	Eukaryota;SAR;Alveolata;	Eukaryota;Dinoflagellata;Dinophyceae;Dinophyceae_unclassified;Dinophyceae_unclassified;Dinophyceae_unclassified	3	4.96224e-06	Dinoflagellata	KC771146,KR362880,FN557541,EF492511	0.920128,0.913738,0.910543,0.910543	NCBI Hits Summary
OTU688	Unclassified;	Unclassified;	Eukaryota;Eukaryota_unclassified;Eukaryota_unclassified;Eukaryota_unclassified;Eukaryota_unclassified;Eukaryota_unclassified	3	2.97734e-05	Eukaryota_unclassified			NCBI Hits Summary
OTU701	Eukaryota;Stramenopiles;	Eukaryota;SAR;Stramenopiles;Ochrophyta;Eustigmatophyceae;Eustigmatales;Nannochloropsis;	Eukaryota;Ochrophyta_ph;Eustigmatophyceae;Eustigmatales;Eustigmatales_fa;Nannochloropsis	3	4.96224e-06	Eustigmatophyceae	AF045042,GQ122355,FJ153674	0.959877,0.959877,0.95679	NCBI Hits Summary
OTU702	Eukaryota;Stramenopiles;	Eukaryota;SAR;Stramenopiles;Ochrophyta;Chrysophyceae;	Eukaryota;Ochrophyta_ph;Chrysophyceae;Chrysophyceae_unclassified;Chrysophyceae_unclassified;Chrysophyceae_unclassified	3	9.92447e-06	Chrysophyceae	U73225,U73229,AB749076,AB749105,MG674913,AF123287,EF185316,EF527128	0.932308,0.932308,0.932308,0.929231,0.929231,0.929231,0.929231,0.929231	NCBI Hits Summary
OTU703	Eukaryota;	Eukaryota;SAR;Alveolata;Dinoflagellata;Dinophyceae;	Eukaryota;Dinoflagellata;Dinophyceae;Dinophyceae_unclassified;Dinophyceae_unclassified;Dinophyceae_unclassified	3	9.92447e-06	Dinoflagellata	KC771146,FN557541	0.960606,0.951515	NCBI Hits Summary
OTU705	Eukaryota;	Eukaryota;SAR;Stramenopiles;Ochrophyta;Chrysophyceae;	Eukaryota;Ochrophyta_ph;Ochrophyta_ph_unclassified;Ochrophyta_ph_unclassified;Ochrophyta_ph_unclassified;Ochrophyta_ph_unclassified	3	1.48867e-05	Chrysophyceae	AB749076,EF185316,FPLS01003729,EF024325	0.932722,0.932722,0.920489,0.920489	NCBI Hits Summary
OTU707	Eukaryota;	Eukaryota;SAR;Stramenopiles;Ochrophyta;Chrysophyceae;	Eukaryota;Ochrophyta_ph;Chrysophyceae;Chrysophyceae_unclassified;Chrysophyceae_unclassified;Chrysophyceae_unclassified	3	1.48867e-05	Chrysophyceae	KJ579298	0.975535	NCBI Hits Summary
OTU708	Unclassified;	Eukaryota;SAR;Stramenopiles;Ochrophyta;Chrysophyceae;	Eukaryota;Ochrophyta_ph;Chrysophyceae;Chrysophyceae_unclassified;Chrysophyceae_unclassified;Chrysophyceae_unclassified	3	1.98489e-05	Chrysophyceae	MG674910,FR865768,FPLS01022061,U73232,HAFT01000499,AB749076,EF165128	0.954268,0.951219,0.951219,0.951219,0.951219,0.951219,0.948171	NCBI Hits Summary
OTU710	Unclassified;	Eukaryota;SAR;Stramenopiles;Ochrophyta;Chrysophyceae;	Eukaryota;Ochrophyta_ph;Chrysophyceae;Ochromonadales;Ochromonadales_fa;Dinobryon	3	1.98489e-05	Chrysophyceae	AF123289,EF165125,AY651081,FPLS01038393,HAGC01014360,FPLS01055925,FR865768	0.966463,0.935976,0.935976,0.935976,0.932927,0.932927,0.932927	NCBI Hits Summary
OTU711	Unclassified;	Eukaryota;SAR;Alveolata;Ciliophora;Intramacronucleata;Conthreep;Prostomatea;Cryptocaryon;	Eukaryota;Ciliophora;Intramacronucleata;Conthreep;Prostomatea;Cryptocaryon	3	1.98489e-05	Ciliophora	KJ761752	0.944079	NCBI Hits Summary
OTU715	Eukaryota;	Eukaryota;SAR;Alveolata;Ciliophora;Intramacronucleata;Conthreep;Oligohymenophorea;	Eukaryota;Ciliophora;Intramacronucleata;Conthreep;Oligohymenophorea;Oligohymenophorea_unclassified	3	9.92447e-06	Ciliophora	KF878932,KF878931,EF527202,KU720304,FJ868188,EF526863	0.929012,0.929012,0.92284,0.92284,0.92284,0.92284	NCBI Hits Summary
OTU716	Unclassified;	Unclassified;	Eukaryota;Eukaryota_unclassified;Eukaryota_unclassified;Eukaryota_unclassified;Eukaryota_unclassified;Eukaryota_unclassified	3	2.97734e-05	Eukaryota_unclassified			NCBI Hits Summary
OTU718	Unclassified;	Eukaryota;SAR;Stramenopiles;Ochrophyta;Chrysophyceae;	Eukaryota;Ochrophyta_ph;Chrysophyceae;Chrysophyceae_unclassified;Chrysophyceae_unclassified;Chrysophyceae_unclassified	3	1.48867e-05	Chrysophyceae	AB749076,M55285,MG674913,AF123296,FPLK01000769,CEOE01007823,AY651089	0.957317,0.948171,0.948171,0.945122,0.945122,0.945122,0.945122	NCBI Hits Summary
OTU721	Eukaryota;	Eukaryota;SAR;Alveolata;	Eukaryota;Dinoflagellata;Dinophyceae;Dinophyceae_unclassified;Dinophyceae_unclassified;Dinophyceae_unclassified	3	9.92447e-06	Dinoflagellata	KC771146,DQ103862	0.990291,0.980583	NCBI Hits Summary
OTU722	Eukaryota;Stramenopiles;Synurophyceae;Synurales;Mallomonadaceae;	Eukaryota;SAR;Stramenopiles;Ochrophyta;Chrysophyceae;Synurales;	Eukaryota;Ochrophyta_ph;Chrysophyceae;Synurales;Synurales_fa;Mallomonas	3	9.92447e-06	Chrysophyceae	U73232,KY942077,U73225,DQ487199,M55285	0.978593,0.975535,0.972477,0.972477,0.972477	NCBI Hits Summary
OTU723	Eukaryota;environmental samples;	Eukaryota;SAR;Alveolata;Dinoflagellata;Dinophyceae;	Eukaryota;Eukaryota_unclassified;Eukaryota_unclassified;Eukaryota_unclassified;Eukaryota_unclassified;Eukaryota_unclassified	3	9.92447e-06	Dinoflagellata	DQ103862,KJ757867,KJ758050,KJ758195,FN557541,KJ758066,KJ758255	0.951515,0.948485,0.948485,0.948485,0.948485,0.948485,0.948485	NCBI Hits Summary
OTU724	Eukaryota;	Eukaryota;SAR;Stramenopiles;Ochrophyta;Chrysophyceae;	Eukaryota;Ochrophyta_ph;Chrysophyceae;Chrysophyceae_unclassified;Chrysophyceae_unclassified;Chrysophyceae_unclassified	3	9.92447e-06	Chrysophyceae	M87332,AF044845	0.951219,0.948171	NCBI Hits Summary
OTU725	Eukaryota;Fungi;	Eukaryota;Amorphea;Obazoa;Opisthokonta;Nucletmycea;Fungi;Dikarya;Basidiomycota;Agaricomycotina;Tremellomycetes;Cystofilobasidiales;Cystofilobasidiaceae;Cystofilobasidium;	Eukaryota;Basidiomycota;Tremellomycetes;Cystofilobasidiales;Cystofilobasidiaceae;Cystofilobasidium	3	9.92447e-06	Basidiomycota	D12801,D12805,AB072225,DQ645524,AB072226,AB032628	0.990964,0.990964,0.98494,0.98494,0.98494,0.978916	NCBI Hits Summary
OTU726	Eukaryota;environmental samples;	Eukaryota;SAR;Alveolata;	Eukaryota;Dinoflagellata;Dinophyceae;Dinophyceae_unclassified;Dinophyceae_unclassified;Dinophyceae_unclassified	3	9.92447e-06	Dinoflagellata	KC771146,KJ763426,KJ763230,KJ762730,KJ763731,KJ762965,KJ759690	0.942424,0.936364,0.936364,0.936364,0.936364,0.936364,0.936364	NCBI Hits Summary
OTU727	Eukaryota;	Eukaryota;SAR;Stramenopiles;Ochrophyta;Pelagophyceae;	Eukaryota;Ochrophyta_ph;Pelagophyceae;Sarcinochrysidales;Sarcinochrysidales_fa;SS1-E01-69	3	9.92447e-06	Pelagophyceae	EU050971,EU050970,EU247837	0.99697,0.99697,0.99697	NCBI Hits Summary
OTU729	Eukaryota;environmental samples;	Eukaryota;SAR;Alveolata;	Eukaryota;Dinoflagellata;Dinophyceae;Dinophyceae_unclassified;Dinophyceae_unclassified;Dinophyceae_unclassified	3	9.92447e-06	Dinoflagellata	KJ763588,KJ758039,KJ758372,DQ103862,KJ757956	0.963636,0.963636,0.957576,0.957576,0.957576	NCBI Hits Summary
OTU730	Eukaryota;Stramenopiles;Bacillariophyta;Bacillariophyceae;Bacillariophycidae;	Eukaryota;SAR;Stramenopiles;Ochrophyta;Diatomea;Bacillariophytina;Bacillariophyceae;	Eukaryota;Diatomea;Diatomea_unclassified;Diatomea_unclassified;Diatomea_unclassified;Diatomea_unclassified	3	1.48867e-05	Bacillariophyceae	AJ535157,GU067830,AM501961,AJ243063,KF417658,KF417668,AB769958	0.929664,0.929664,0.926606,0.923547,0.923547,0.923547,0.923547	NCBI Hits Summary
OTU731	Unclassified;	Unclassified;	Eukaryota;Eukaryota_unclassified;Eukaryota_unclassified;Eukaryota_unclassified;Eukaryota_unclassified;Eukaryota_unclassified	3	1.48867e-05	Eukaryota_unclassified			NCBI Hits Summary
OTU732	Eukaryota;	Eukaryota;SAR;Alveolata;	Eukaryota;Dinoflagellata;Dinophyceae;Dinophyceae_unclassified;Dinophyceae_unclassified;Dinophyceae_unclassified	3	9.92447e-06	Dinoflagellata	KC771146,KJ763731,KJ758116,KJ760672,KR535601,KJ763230,KJ763426	0.99373,0.981191,0.981191,0.981191,0.981191,0.981191,0.981191	NCBI Hits Summary
OTU735	Eukaryota;Stramenopiles;Bacillariophyta;Coscinodiscophyceae;Coscinodiscophycidae;Aulacoseiraceae;Aulacoseira;	Eukaryota;SAR;Stramenopiles;Ochrophyta;Diatomea;Coscinodiscophytina;Melosirids;Aulacoseira;	Eukaryota;Diatomea;Coscinodiscophytina_cl;Coscinodiscophytina_or;Melosirids;Aulacoseira	3	1.48867e-05	Bacillariophyceae	AY121820	0.960606	NCBI Hits Summary
OTU736	Eukaryota;Viridiplantae;Chlorophyta;Ulvophyceae;	Eukaryota;Archaeplastida;Chloroplastida;Chlorophyta;Ulvophyceae;	Eukaryota;Chlorophyta_ph;Ulvophyceae;Ulvophyceae_or;Ulvophyceae_fa;Ulvophyceae_ge	3	1.48867e-05	Chlorophyta	MF034602,Z47996,FR865654,MF034647,MF034601	0.957055,0.957055,0.957055,0.941718,0.941718	NCBI Hits Summary
OTU737	Eukaryota;Viridiplantae;Chlorophyta;Chlorophyceae;Chaetophorales;	Eukaryota;Archaeplastida;Chloroplastida;Chlorophyta;Chlorophyceae;Chaetophorales;	Eukaryota;Chlorophyta_ph;Chlorophyta_ph_unclassified;Chlorophyta_ph_unclassified;Chlorophyta_ph_unclassified;Chlorophyta_ph_unclassified	3	1.48867e-05	Chlorophyta	LN870279,FR865749,U83130	0.948171,0.929878,0.929878	NCBI Hits Summary
OTU738	Eukaryota;Viridiplantae;Chlorophyta;	Eukaryota;Archaeplastida;Chloroplastida;Chlorophyta;Ulvophyceae;	Eukaryota;Chlorophyta_ph;Ulvophyceae;Ulvophyceae_or;Ulvophyceae_fa;Ulvophyceae_ge	3	1.48867e-05	Chlorophyta	FR865654,MF034602,Z47996,Z28970,MF034601	0.954128,0.954128,0.954128,0.938838,0.938838	NCBI Hits Summary
OTU739	Eukaryota;	Eukaryota;SAR;Alveolata;Dinoflagellata;Dinophyceae;Peridiniphycidae;	Eukaryota;Dinoflagellata;Dinophyceae;Peridiniphycidae_or;Thoracosphaeraceae;Thoracosphaeraceae_unclassified	3	1.48867e-05	Dinoflagellata	JN090875,AY121856,AY590483	0.966667,0.957576,0.954545	NCBI Hits Summary
OTU740	Eukaryota;Stramenopiles;Bacillariophyta;Fragilariophyceae;Fragilariophycidae;	Eukaryota;SAR;Stramenopiles;Ochrophyta;Diatomea;Coscinodiscophytina;Fragilariales;Fragilaria;	Eukaryota;Diatomea;Coscinodiscophytina_cl;Fragilariales;Fragilariales_fa;Fragilariales_fa_unclassified	3	1.48867e-05	Bacillariophyceae	AM497738,AM497722,EF465478,AJ535137,EF465469,AM497721,EF465492	0.929664,0.929664,0.929664,0.929664,0.929664,0.926606,0.926606	NCBI Hits Summary
OTU744	Unclassified;	Eukaryota;SAR;Stramenopiles;Ochrophyta;Chrysophyceae;	Eukaryota;Ochrophyta_ph;Chrysophyceae;Chrysophyceae_unclassified;Chrysophyceae_unclassified;Chrysophyceae_unclassified	3	1.48867e-05	Chrysophyceae	FPLK01000769,GU290107,CEOE01007823,FPLS01022061,MG674910	0.993865,0.993865,0.969325,0.969325,0.96319	NCBI Hits Summary
OTU745	Eukaryota;environmental samples;	Eukaryota;Amorphea;Obazoa;Opisthokonta;Nucletmycea;Nucleariidae and Fonticula group;Nucleariidae;Nuclearia;	Eukaryota;Eukaryota_unclassified;Eukaryota_unclassified;Eukaryota_unclassified;Eukaryota_unclassified;Eukaryota_unclassified	3	1.98489e-05	Eukaryota_unclassified			NCBI Hits Summary
OTU746	Eukaryota;Fungi;	Eukaryota;Amorphea;Obazoa;Opisthokonta;Nucletmycea;Fungi;Chytridiomycota;Incertae Sedis;Chytridiomycetes;	Eukaryota;Chytridiomycota;Chytridiomycetes;Chytridiomycetes_unclassified;Chytridiomycetes_unclassified;Chytridiomycetes_unclassified	3	1.48867e-05	Chytridiomycota	AY635821,AF164272	0.93994,0.927928	NCBI Hits Summary
OTU751	Eukaryota;Fungi;Dikarya;Basidiomycota;Agaricomycotina;Agaricomycetes;	Eukaryota;Amorphea;Obazoa;Opisthokonta;Nucletmycea;Fungi;Dikarya;Basidiomycota;Agaricomycotina;Agaricomycetes;Polyporales;	Eukaryota;Basidiomycota;Agaricomycetes;Polyporales;Polyporales_unclassified;Polyporales_unclassified	3	1.48867e-05	Basidiomycota	EF023603,AY336758,MARA01000083,AF518574,GBYM01000174,GBYM01000157	1,0.996997,0.993994,0.993994,0.993994,0.993994	NCBI Hits Summary
OTU756	Eukaryota;	Eukaryota;SAR;Stramenopiles;Ochrophyta;Chrysophyceae;	Eukaryota;Ochrophyta_ph;Chrysophyceae;Chrysophyceae_unclassified;Chrysophyceae_unclassified;Chrysophyceae_unclassified	3	1.48867e-05	Chrysophyceae	MG674913,AB749105,U73229,EF165128,EF527128,EF165147	0.935976,0.929878,0.929878,0.929878,0.929878,0.929878	NCBI Hits Summary
OTU757	Eukaryota;	Eukaryota;Amorphea;Obazoa;Opisthokonta;Holozoa;Choanozoa;Choanoflagellata;Choanoflagellida;Acanthoecida;	Eukaryota;Holozoa_ph;Choanoflagellida;Acanthoecida_or;Stephanoecidae;Stephanoecidae_unclassified	3	1.48867e-05	Holozoa	KJ757092	0.918675	NCBI Hits Summary
OTU758	Eukaryota;Stramenopiles;	Eukaryota;SAR;Stramenopiles;Ochrophyta;Chrysophyceae;	Eukaryota;Ochrophyta_ph;Chrysophyceae;Chromulinales;Chromulinales_fa;Chromulinales_fa_unclassified	3	1.48867e-05	Chrysophyceae	M87332,AF123299	0.948171,0.935976	NCBI Hits Summary
OTU759	Eukaryota;Viridiplantae;Streptophyta;Embryophyta;Tracheophyta;Spermatophyta;Pinidae;Pinales;Pinaceae;Pinus;	Eukaryota;Archaeplastida;Chloroplastida;Charophyta;Phragmoplastophyta;Streptophyta;Embryophyta;Tracheophyta;Spermatophyta;Pinophyta;Pinales;Pinus;	Eukaryota;Phragmoplastophyta;Embryophyta;Pinophyta_or;Pinophyta_fa;Pinophyta_ge	3	1.98489e-05	Embryophyta	GFLL01048585,APFE031499386,APFE031454343,APFE030338169,APFE031679979,APFE030268033,APFE030029431	0.96131,0.946429,0.946429,0.946429,0.946429,0.946429,0.946429	NCBI Hits Summary
OTU762	Eukaryota;Stramenopiles;Synurophyceae;Synurales;Mallomonadaceae;	Eukaryota;SAR;Stramenopiles;Ochrophyta;Chrysophyceae;Synurales;	Eukaryota;Ochrophyta_ph;Chrysophyceae;Chrysophyceae_unclassified;Chrysophyceae_unclassified;Chrysophyceae_unclassified	3	1.48867e-05	Chrysophyceae	EF165147	0.960366	NCBI Hits Summary
OTU763	Eukaryota;	Eukaryota;SAR;Stramenopiles;Ochrophyta;Dictyochophyceae;Pedinellales;	Eukaryota;Ochrophyta_ph;Dictyochophyceae;Pedinellales;Pedinellales_fa;Pedinellales_ge	3	9.92447e-06	Dictyochophyceae	FR874720,KP404878,JN090870	0.945455,0.933333,0.933333	NCBI Hits Summary
OTU764	Eukaryota;Ichthyosporea;Ichthyophonida;	Eukaryota;Amorphea;Obazoa;Opisthokonta;Holozoa;Choanozoa;Choanoflagellata;Ichthyosporea;Ichthyophonae;Pseudoperkinsidae;	Eukaryota;Holozoa_ph;Ichthyosporea;Pseudoperkinsidae;Pseudoperkinsidae_fa;Pseudoperkinsidae_ge	3	1.48867e-05	Holozoa	MWQC01000041	0.948949	NCBI Hits Summary
OTU766	Eukaryota;environmental samples;	Eukaryota;SAR;Alveolata;	Eukaryota;Eukaryota_unclassified;Eukaryota_unclassified;Eukaryota_unclassified;Eukaryota_unclassified;Eukaryota_unclassified	3	1.48867e-05	Eukaryota_unclassified	KJ759500,KJ759639,KJ763108,KJ762900,KJ762691,KJ763031,KJ762932,KJ762908,KJ763359	0.938838,0.938838,0.938838,0.938838,0.938838,0.938838,0.938838,0.938838,0.938838	NCBI Hits Summary
OTU767	Eukaryota;environmental samples;	Eukaryota;SAR;Alveolata;	Eukaryota;Eukaryota_unclassified;Eukaryota_unclassified;Eukaryota_unclassified;Eukaryota_unclassified;Eukaryota_unclassified	3	1.48867e-05	Eukaryota_unclassified	KJ759500,KJ759639,KJ763108,KJ762900,KJ762691,KJ763031,KJ762932,KJ762908,KJ763359	0.939024,0.939024,0.939024,0.939024,0.939024,0.939024,0.939024,0.939024,0.939024	NCBI Hits Summary
OTU768	Unclassified;	Unclassified;	Eukaryota;Eukaryota_unclassified;Eukaryota_unclassified;Eukaryota_unclassified;Eukaryota_unclassified;Eukaryota_unclassified	3	1.48867e-05	Eukaryota_unclassified			NCBI Hits Summary
OTU771	Eukaryota;Alveolata;	Eukaryota;SAR;Alveolata;Ciliophora;Intramacronucleata;Spirotrichea;Choreotrichia;Tintinnidium;	Eukaryota;Ciliophora;Intramacronucleata;Spirotrichea;Choreotrichia;Tintinnidium	3	1.48867e-05	Ciliophora	EU162620	0.943574	NCBI Hits Summary
OTU772	Eukaryota;Fungi;Dikarya;Basidiomycota;Pucciniomycotina;Pucciniomycetes;Pucciniales;	Eukaryota;Amorphea;Obazoa;Opisthokonta;Nucletmycea;Fungi;Dikarya;Basidiomycota;Pucciniomycotina;Pucciniomycetes;Pucciniales;	Eukaryota;Basidiomycota;Pucciniomycetes;Pucciniales;Melampsoraceae;Melampsora	3	1.48867e-05	Basidiomycota	AECX01001027,AECX01001630,GBSG01008323,AY123300,AB011017,AY123298	0.984985,0.984985,0.975976,0.975976,0.96997,0.96997	NCBI Hits Summary
OTU775	Unclassified;	Unclassified;	Eukaryota;Eukaryota_unclassified;Eukaryota_unclassified;Eukaryota_unclassified;Eukaryota_unclassified;Eukaryota_unclassified	3	1.48867e-05	Eukaryota_unclassified			NCBI Hits Summary
OTU776	Unclassified;	Unclassified;	Eukaryota;Eukaryota_unclassified;Eukaryota_unclassified;Eukaryota_unclassified;Eukaryota_unclassified;Eukaryota_unclassified	3	1.48867e-05	Eukaryota_unclassified			NCBI Hits Summary
OTU777	Unclassified;	Unclassified;	Eukaryota;Eukaryota_unclassified;Eukaryota_unclassified;Eukaryota_unclassified;Eukaryota_unclassified;Eukaryota_unclassified	3	1.48867e-05	Eukaryota_unclassified			NCBI Hits Summary
OTU779	Unclassified;	Unclassified;	Eukaryota;Eukaryota_unclassified;Eukaryota_unclassified;Eukaryota_unclassified;Eukaryota_unclassified;Eukaryota_unclassified	3	1.48867e-05	Eukaryota_unclassified			NCBI Hits Summary
OTU780	Eukaryota;environmental samples;	Eukaryota;SAR;Alveolata;	Eukaryota;Dinoflagellata;Dinoflagellata_unclassified;Dinoflagellata_unclassified;Dinoflagellata_unclassified;Dinoflagellata_unclassified	3	1.98489e-05	Dinoflagellata	KJ759500,KJ762691,KJ759639,KJ762900,KJ757950,KJ763031,KJ762932,KJ762908,KJ763108	0.939024,0.939024,0.939024,0.939024,0.939024,0.939024,0.939024,0.939024,0.939024	NCBI Hits Summary
OTU781	Unclassified;	Unclassified;	Eukaryota;Eukaryota_unclassified;Eukaryota_unclassified;Eukaryota_unclassified;Eukaryota_unclassified;Eukaryota_unclassified	3	1.48867e-05	Eukaryota_unclassified			NCBI Hits Summary
OTU783	Eukaryota;Fungi;Dikarya;Basidiomycota;Agaricomycotina;Agaricomycetes;	Eukaryota;Amorphea;Obazoa;Opisthokonta;Nucletmycea;Fungi;Dikarya;Basidiomycota;Agaricomycotina;Agaricomycetes;Russulales;	Eukaryota;Basidiomycota;Agaricomycetes;Russulales;Russulales_fa;Russulales_ge	3	1.48867e-05	Basidiomycota	AF026586,AF334912,AF334901	0.996997,0.984985,0.981982	NCBI Hits Summary
OTU784	Eukaryota;environmental samples;	Eukaryota;SAR;Rhizaria;Cercozoa;Thecofilosea;Ebriacea;Ebria;	Eukaryota;Eukaryota_unclassified;Eukaryota_unclassified;Eukaryota_unclassified;Eukaryota_unclassified;Eukaryota_unclassified	3	1.48867e-05	Cercozoa	JN090861,FJ824126	0.936556,0.915408	NCBI Hits Summary
OTU785	Unclassified;	Unclassified;	Eukaryota;Eukaryota_unclassified;Eukaryota_unclassified;Eukaryota_unclassified;Eukaryota_unclassified;Eukaryota_unclassified	3	1.48867e-05	Eukaryota_unclassified			NCBI Hits Summary
OTU786	Unclassified;	Eukaryota;Amorphea;Obazoa;Opisthokonta;Nucletmycea;Fungi;Chytridiomycota;Incertae Sedis;Chytridiomycetes;	Eukaryota;Chytridiomycota;Chytridiomycetes;Chytridiomycetes_unclassified;Chytridiomycetes_unclassified;Chytridiomycetes_unclassified	3	1.48867e-05	Chytridiomycota	FPLS01000762,GQ995437,AF164272	0.960961,0.960961,0.954955	NCBI Hits Summary
OTU787	Eukaryota;environmental samples;	Eukaryota;SAR;Alveolata;	Eukaryota;Dinoflagellata;Dinophyceae;Dinophyceae_unclassified;Dinophyceae_unclassified;Dinophyceae_unclassified	3	1.48867e-05	Dinoflagellata	KJ762970,KJ762900,KJ763108,KJ763031,KJ762871,KJ762932,KJ759500,KJ762908	0.914634,0.911585,0.911585,0.911585,0.911585,0.911585,0.911585,0.911585	NCBI Hits Summary
OTU788	Unclassified;	Unclassified;	Eukaryota;Ciliophora;Intramacronucleata;Intramacronucleata_unclassified;Intramacronucleata_unclassified;Intramacronucleata_unclassified	3	1.48867e-05	Ciliophora			NCBI Hits Summary
OTU789	Unclassified;	Unclassified;	Eukaryota;Eukaryota_unclassified;Eukaryota_unclassified;Eukaryota_unclassified;Eukaryota_unclassified;Eukaryota_unclassified	3	1.48867e-05	Eukaryota_unclassified			NCBI Hits Summary
OTU790	Eukaryota;environmental samples;	Eukaryota;SAR;Alveolata;	Eukaryota;Dinoflagellata;Dinophyceae;Dinophyceae_unclassified;Dinophyceae_unclassified;Dinophyceae_unclassified	3	1.48867e-05	Dinoflagellata	KJ757950,KJ762691,KJ759639,KJ762416,KJ759500,KJ759266,GU819725,HM581708	0.939024,0.939024,0.935976,0.935976,0.935976,0.935976,0.935976,0.935976	NCBI Hits Summary
OTU792	Unclassified;	Unclassified;	Eukaryota;Dinoflagellata;Dinophyceae;Dinophyceae_unclassified;Dinophyceae_unclassified;Dinophyceae_unclassified	3	9.92447e-06	Dinoflagellata			NCBI Hits Summary
OTU794	Eukaryota;	Eukaryota;SAR;Alveolata;	Eukaryota;Eukaryota_unclassified;Eukaryota_unclassified;Eukaryota_unclassified;Eukaryota_unclassified;Eukaryota_unclassified	3	1.48867e-05	Eukaryota_unclassified	GU819725,KJ757950,KJ762691,KJ759639,KJ762908,KJ763108,KJ762900,KJ763031,KJ763359	0.929878,0.929878,0.929878,0.929878,0.929878,0.929878,0.929878,0.929878,0.929878	NCBI Hits Summary
OTU795	Eukaryota;environmental samples;	Eukaryota;SAR;Alveolata;	Eukaryota;Eukaryota_unclassified;Eukaryota_unclassified;Eukaryota_unclassified;Eukaryota_unclassified;Eukaryota_unclassified	3	1.48867e-05	Eukaryota_unclassified	KJ762908,KJ762900,KJ762932,KJ762871,KJ763108,KJ763365,KJ759500,KJ759639,KJ763031	0.945122,0.945122,0.945122,0.945122,0.945122,0.945122,0.945122,0.945122,0.945122	NCBI Hits Summary
OTU799	Unclassified;	Eukaryota;SAR;Stramenopiles;MAST-12;	Eukaryota;MAST-12;MAST-12A;MAST-12A_or;MAST-12A_fa;MAST-12A_ge	3	1.48867e-05	MAST-12A	FPLS01035654	0.960961	NCBI Hits Summary
OTU802	Unclassified;	Unclassified;	Eukaryota;Eukaryota_unclassified;Eukaryota_unclassified;Eukaryota_unclassified;Eukaryota_unclassified;Eukaryota_unclassified	3	1.48867e-05	Eukaryota_unclassified			NCBI Hits Summary
OTU803	Eukaryota;	Eukaryota;Amorphea;Obazoa;Opisthokonta;Nucletmycea;Fungi;	Eukaryota;Eukaryota_unclassified;Eukaryota_unclassified;Eukaryota_unclassified;Eukaryota_unclassified;Eukaryota_unclassified	3	1.48867e-05	Eukaryota_unclassified	FR874713	0.978462	NCBI Hits Summary
OTU804	Eukaryota;environmental samples;	Eukaryota;SAR;Alveolata;	Eukaryota;Dinoflagellata;Dinophyceae;Gymnodiniphycidae;Gymnodinium_clade;Gymnodinium_clade_unclassified	3	4.96224e-06	Dinoflagellata	KJ758254,KJ758214,KJ758137,KJ759537,KJ758322,FJ947037,KJ759489,KJ758159	0.987302,0.987302,0.984127,0.984127,0.984127,0.984127,0.984127,0.984127	NCBI Hits Summary
OTU805	Eukaryota;Fungi;Dikarya;Ascomycota;Pezizomycotina;Eurotiomycetes;Chaetothyriomycetidae;Chaetothyriales;Herpotrichiellaceae;	Eukaryota;Amorphea;Obazoa;Opisthokonta;Nucletmycea;Fungi;Dikarya;Ascomycota;Pezizomycotina;Eurotiomycetes;Chaetothyriales;Herpotrichiellaceae;	Eukaryota;Ascomycota;Eurotiomycetes;Chaetothyriales;Herpotrichiellaceae;Exophiala	3	9.92447e-06	Ascomycota	DQ521604,KJ757522,JN856017,DQ521605,JN856018,JN856010,JN856016,JN856013,JN856020	1,1,1,1,1,1,1,1,1	NCBI Hits Summary
OTU806	Eukaryota;Fungi;Dikarya;Ascomycota;Pezizomycotina;Sordariomycetes;	Eukaryota;Amorphea;Obazoa;Opisthokonta;Nucletmycea;Fungi;Dikarya;Ascomycota;Pezizomycotina;Sordariomycetes;	Eukaryota;Ascomycota;Sordariomycetes;Sordariomycetes_unclassified;Sordariomycetes_unclassified;Sordariomycetes_unclassified	3	9.92447e-06	Ascomycota	FM178241,AB014045	0.993958,0.975831	NCBI Hits Summary
OTU807	Eukaryota;	Eukaryota;Amorphea;Obazoa;Opisthokonta;Nucletmycea;Fungi;Chytridiomycota;Incertae Sedis;Chytridiomycetes;	Eukaryota;Chytridiomycota;Chytridiomycetes;Chytridiomycetes_unclassified;Chytridiomycetes_unclassified;Chytridiomycetes_unclassified	3	1.48867e-05	Chytridiomycota	HQ219419,EF100268	0.960961,0.948949	NCBI Hits Summary
OTU809	Unclassified;	Unclassified;	Eukaryota;Eukaryota_unclassified;Eukaryota_unclassified;Eukaryota_unclassified;Eukaryota_unclassified;Eukaryota_unclassified	3	9.92447e-06	Eukaryota_unclassified			NCBI Hits Summary
OTU811	Eukaryota;Amoebozoa;Discosea;Flabellinia;Vannellidae;Vannella;	Eukaryota;Amorphea;Amoebozoa;Discosea;Flabellinia;Vannellida;BIO10-D10;	Eukaryota;Eukaryota_unclassified;Eukaryota_unclassified;Eukaryota_unclassified;Eukaryota_unclassified;Eukaryota_unclassified	3	9.92447e-06	Eukaryota_unclassified			NCBI Hits Summary
OTU812	Eukaryota;	Eukaryota;Amorphea;Obazoa;Opisthokonta;Nucletmycea;Fungi;Chytridiomycota;Incertae Sedis;Chytridiomycetes;	Eukaryota;Chytridiomycota;Chytridiomycetes;Chytridiomycetes_unclassified;Chytridiomycetes_unclassified;Chytridiomycetes_unclassified	3	9.92447e-06	Chytridiomycota	AY642701,DQ244005,HQ219449,GQ995300	0.945783,0.915663,0.915663,0.915663	NCBI Hits Summary
OTU813	Eukaryota;Fungi;Dikarya;Ascomycota;Pezizomycotina;Dothideomycetes;Pleosporomycetidae;Pleosporales;Pleosporineae;Didymellaceae;	Eukaryota;Amorphea;Obazoa;Opisthokonta;Nucletmycea;Fungi;Dikarya;Ascomycota;Pezizomycotina;Dothideomycetes;Pleosporales;Didymellaceae;	Eukaryota;Ascomycota;Dothideomycetes;Pleosporales;Pleosporales_unclassified;Pleosporales_unclassified	3	9.92447e-06	Ascomycota	EU167560,EU167566,EU167600,EU167565,AB303549,EU167573,EU167575,EU167557	0.912913,0.912913,0.912913,0.912913,0.90991,0.90991,0.90991,0.90991	NCBI Hits Summary
OTU814	Unclassified;	Eukaryota;SAR;Stramenopiles;Incertae Sedis;Blastocystis;	Eukaryota;Incertae_Sedis;Incertae_Sedis_cl;Incertae_Sedis_or;Incertae_Sedis_fa;Blastocystis	3	9.92447e-06	Incertae_Sedis	CECA01041700,HQ909890	0.966667,0.960606	NCBI Hits Summary
OTU816	Eukaryota;Alveolata;Ciliophora;Intramacronucleata;Oligohymenophorea;Hymenostomatida;Tetrahymenina;	Eukaryota;SAR;Alveolata;Ciliophora;Intramacronucleata;Conthreep;Oligohymenophorea;Hymenostomatia;	Eukaryota;Ciliophora;Intramacronucleata;Conthreep;Oligohymenophorea;Oligohymenophorea_unclassified	3	9.92447e-06	Ciliophora	HM014309,U36222	0.968153,0.958599	NCBI Hits Summary
OTU817	Eukaryota;Stramenopiles;Oomycetes;	Eukaryota;SAR;Stramenopiles;Peronosporomycetes;	Eukaryota;Peronosporomycetes;Peronosporomycetes_cl;Peronosporomycetes_or;Peronosporomycetes_fa;Aphanomyces	3	1.98489e-05	Peronosporomycetes	AYTG01000691,AJ238662,M32705	0.993994,0.96997,0.963964	NCBI Hits Summary
OTU818	Unclassified;	Unclassified;	Eukaryota;Euglenozoa;Euglenida;Euglenida_unclassified;Euglenida_unclassified;Euglenida_unclassified	3	9.92447e-06	Euglenida			NCBI Hits Summary
OTU819	Unclassified;	Eukaryota;SAR;Stramenopiles;Ochrophyta;Chrysophyceae;	Eukaryota;Ochrophyta_ph;Chrysophyceae;Chrysophyceae_unclassified;Chrysophyceae_unclassified;Chrysophyceae_unclassified	3	1.48867e-05	Chrysophyceae	GU290089,FR865768,FPLS01022061,AF123298,AY082970,EF165142,FPLS01038393	0.932927,0.932927,0.932927,0.926829,0.926829,0.926829,0.926829	NCBI Hits Summary
OTU820	Unclassified;	Eukaryota;SAR;Stramenopiles;Ochrophyta;Chrysophyceae;	Eukaryota;Ochrophyta_ph;Chrysophyceae;Chrysophyceae_unclassified;Chrysophyceae_unclassified;Chrysophyceae_unclassified	3	4.96224e-06	Chrysophyceae	AY082970	0.941896	NCBI Hits Summary
OTU821	Eukaryota;	Eukaryota;Amorphea;Obazoa;Opisthokonta;Nucletmycea;Fungi;Chytridiomycota;Incertae Sedis;Chytridiomycetes;	Eukaryota;Chytridiomycota;Chytridiomycetes;Chytridiomycetes_unclassified;Chytridiomycetes_unclassified;Chytridiomycetes_unclassified	3	9.92447e-06	Chytridiomycota	AY642701,HQ219449,HQ191292,GQ995300,GQ995437	0.951807,0.921687,0.921687,0.921687,0.921687	NCBI Hits Summary
OTU822	Unclassified;	Eukaryota;Amorphea;Amoebozoa;SAR;Stramenopiles;Labyrinthulomycetes;Sorodiplophrys;	Eukaryota;Eukaryota_unclassified;Eukaryota_unclassified;Eukaryota_unclassified;Eukaryota_unclassified;Eukaryota_unclassified	3	9.92447e-06	Eukaryota_unclassified	FPLS01016464	0.93994	NCBI Hits Summary
OTU824	Eukaryota;	Eukaryota;Discoba;Discicristata;Heterolobosea;Tetramitia;Allovahlkampfia;	Eukaryota;Eukaryota_unclassified;Eukaryota_unclassified;Eukaryota_unclassified;Eukaryota_unclassified;Eukaryota_unclassified	3	9.92447e-06	Eukaryota_unclassified	AY965862	0.922156	NCBI Hits Summary
OTU825	Eukaryota;Fungi;Dikarya;Basidiomycota;Agaricomycotina;Tremellomycetes;Cystofilobasidiales;Mrakiaceae;	Eukaryota;Amorphea;Obazoa;Opisthokonta;Nucletmycea;Fungi;Dikarya;Basidiomycota;Agaricomycotina;Tremellomycetes;Cystofilobasidiales;Mrakiaceae;	Eukaryota;Basidiomycota;Tremellomycetes;Cystofilobasidiales;Mrakiaceae;Itersonilia	3	9.92447e-06	Basidiomycota	AB072227	0.990991	NCBI Hits Summary
OTU827	Eukaryota;	Eukaryota;Amorphea;Obazoa;Opisthokonta;Nucletmycea;Fungi;Chytridiomycota;Incertae Sedis;Chytridiomycetes;	Eukaryota;Eukaryota_unclassified;Eukaryota_unclassified;Eukaryota_unclassified;Eukaryota_unclassified;Eukaryota_unclassified	3	9.92447e-06	Chytridiomycota	HQ219419	0.933535	NCBI Hits Summary
OTU829	Eukaryota;	Eukaryota;Amorphea;Obazoa;Opisthokonta;Nucletmycea;Fungi;Dikarya;Basidiomycota;Pucciniomycotina;Microbotryomycetes;	Eukaryota;Basidiomycota;Microbotryomycetes;Kriegeriales;Camptobasidiaceae;Camptobasidiaceae_ge	3	9.92447e-06	Basidiomycota	LC109004,EF023665	0.996997,0.96997	NCBI Hits Summary
OTU830	unclassified sequences;metagenomes;	Eukaryota;Amorphea;Amoebozoa;SAR;Stramenopiles;Labyrinthulomycetes;Sorodiplophrys;	Eukaryota;Eukaryota_unclassified;Eukaryota_unclassified;Eukaryota_unclassified;Eukaryota_unclassified;Eukaryota_unclassified	3	9.92447e-06	Eukaryota_unclassified	FPLS01027764,FPLS01016463,FPLS01041490	0.909091,0.909091,0.90303	NCBI Hits Summary
OTU831	Unclassified;	Unclassified;	Eukaryota;Eukaryota_unclassified;Eukaryota_unclassified;Eukaryota_unclassified;Eukaryota_unclassified;Eukaryota_unclassified	3	9.92447e-06	Eukaryota_unclassified			NCBI Hits Summary
OTU833	Unclassified;	Unclassified;	Eukaryota;Eukaryota_unclassified;Eukaryota_unclassified;Eukaryota_unclassified;Eukaryota_unclassified;Eukaryota_unclassified	3	9.92447e-06	Eukaryota_unclassified			NCBI Hits Summary
OTU834	Eukaryota;Fungi;Dikarya;Basidiomycota;Pucciniomycotina;Microbotryomycetes;Microbotryales;	Eukaryota;Amorphea;Obazoa;Opisthokonta;Nucletmycea;Fungi;Dikarya;Basidiomycota;Pucciniomycotina;Microbotryomycetes;Microbotryales;	Eukaryota;Basidiomycota;Microbotryomycetes;Microbotryales;Ustilentylomataceae;Ustilentyloma	3	9.92447e-06	Basidiomycota	AY657013,X60181,FBRE01000057,FBRE01000015,FBRE01000099,FBRN01000104,FBRN01000061	0.997006,0.967066,0.967066,0.967066,0.967066,0.967066,0.967066	NCBI Hits Summary
OTU835	Unclassified;	Unclassified;	Eukaryota;Ciliophora;Intramacronucleata;Intramacronucleata_unclassified;Intramacronucleata_unclassified;Intramacronucleata_unclassified	3	9.92447e-06	Ciliophora			NCBI Hits Summary
OTU836	Eukaryota;Fungi;	Eukaryota;Amorphea;Obazoa;Opisthokonta;Nucletmycea;Fungi;Chytridiomycota;Incertae Sedis;Chytridiomycetes;	Eukaryota;Chytridiomycota;Chytridiomycetes;Rhizophydiales;uncultured;uncultured_ge	3	9.92447e-06	Chytridiomycota	DQ244005,EF023155	0.966867,0.951807	NCBI Hits Summary
OTU837	Unclassified;	Eukaryota;SAR;Rhizaria;Cercozoa;Thecofilosea;	Eukaryota;Cercozoa;Thecofilosea;Cryomonadida;Rhizaspididae;Rhogostoma	3	9.92447e-06	Cercozoa	EF024805,EF023834,HQ121430,DQ243997	0.98125,0.975,0.975,0.971875	NCBI Hits Summary
OTU838	Unclassified;	Eukaryota;SAR;Alveolata;Protalveolata;Perkinsidae;A31;	Eukaryota;Protalveolata;Perkinsidae;A31;A31_fa;A31_ge	3	9.92447e-06	Perkinsidae	EU162629,DQ244038,FPLS01058904	0.932099,0.932099,0.910494	NCBI Hits Summary
OTU839	Eukaryota;Ichthyosporea;	Eukaryota;Amorphea;Obazoa;Opisthokonta;Holozoa;Choanozoa;Choanoflagellata;Ichthyosporea;Ichthyophonae;	Eukaryota;Eukaryota_unclassified;Eukaryota_unclassified;Eukaryota_unclassified;Eukaryota_unclassified;Eukaryota_unclassified	3	9.92447e-06	Holozoa	AY363958	0.963855	NCBI Hits Summary
OTU840	Unclassified;	Unclassified;	Eukaryota;Eukaryota_unclassified;Eukaryota_unclassified;Eukaryota_unclassified;Eukaryota_unclassified;Eukaryota_unclassified	3	9.92447e-06	Eukaryota_unclassified			NCBI Hits Summary
OTU841	Unclassified;	Unclassified;	Eukaryota;Eukaryota_unclassified;Eukaryota_unclassified;Eukaryota_unclassified;Eukaryota_unclassified;Eukaryota_unclassified	3	9.92447e-06	Eukaryota_unclassified			NCBI Hits Summary
OTU845	Eukaryota;Viridiplantae;Chlorophyta;	Eukaryota;Archaeplastida;Chloroplastida;Chlorophyta;Chlorodendrophyceae;Chlorodendrales;	Eukaryota;Chlorophyta_ph;Chlorodendrophyceae;Chlorodendrophyceae_or;Chlorodendrophyceae_fa;Chlorodendrophyceae_ge	3	9.92447e-06	Chlorophyta	X68484	0.99697	NCBI Hits Summary
OTU846	Eukaryota;Stramenopiles;Chrysophyceae;	Eukaryota;SAR;Stramenopiles;Ochrophyta;Chrysophyceae;	Eukaryota;Ochrophyta_ph;Chrysophyceae;Chromulinales;Chromulinales_fa;Chromulina	3	9.92447e-06	Chrysophyceae	M87332	0.993921	NCBI Hits Summary
OTU848	Eukaryota;	Eukaryota;Amorphea;Obazoa;Opisthokonta;Nucletmycea;Fungi;Chytridiomycota;Incertae Sedis;Chytridiomycetes;	Eukaryota;Eukaryota_unclassified;Eukaryota_unclassified;Eukaryota_unclassified;Eukaryota_unclassified;Eukaryota_unclassified	3	9.92447e-06	Chytridiomycota	HQ219429,AF164272,EU162640	0.915916,0.906907,0.906907	NCBI Hits Summary
OTU849	Unclassified;	Unclassified;	Eukaryota;Dinoflagellata;Dinophyceae;Dinophyceae_unclassified;Dinophyceae_unclassified;Dinophyceae_unclassified	3	4.96224e-06	Dinoflagellata			NCBI Hits Summary
OTU850	Unclassified;	Unclassified;	Eukaryota;Eukaryota_unclassified;Eukaryota_unclassified;Eukaryota_unclassified;Eukaryota_unclassified;Eukaryota_unclassified	3	9.92447e-06	Eukaryota_unclassified			NCBI Hits Summary
OTU855	Eukaryota;	Eukaryota;SAR;Alveolata;	Eukaryota;Dinoflagellata;Dinophyceae;Gymnodiniphycidae;Gymnodinium_clade;Gymnodinium_clade_unclassified	3	4.96224e-06	Dinoflagellata	AF022196,KJ758547,DQ103871,KJ759489,KJ757985,KJ757452,FJ947037,KJ758214	0.939577,0.939577,0.939577,0.936556,0.936556,0.936556,0.936556,0.936556	NCBI Hits Summary
OTU857	Eukaryota;Alveolata;Ciliophora;Intramacronucleata;	Eukaryota;SAR;Alveolata;Ciliophora;Intramacronucleata;Conthreep;Oligohymenophorea;Peniculia;	Eukaryota;Ciliophora;Intramacronucleata;Conthreep;Oligohymenophorea;Stokesia	3	1.98489e-05	Ciliophora	HM030738,KT461932,KJ475296	0.962848,0.95356,0.93808	NCBI Hits Summary
OTU858	Unclassified;	Unclassified;	Eukaryota;Euglenozoa;Euglenida;Euglenophyceae_or;Euglenaceae;Euglenaceae_unclassified	3	9.92447e-06	Euglenida			NCBI Hits Summary
OTU859	Unclassified;	Unclassified;	Eukaryota;Eukaryota_unclassified;Eukaryota_unclassified;Eukaryota_unclassified;Eukaryota_unclassified;Eukaryota_unclassified	3	9.92447e-06	Eukaryota_unclassified			NCBI Hits Summary
OTU863	Eukaryota;environmental samples;	Eukaryota;SAR;Rhizaria;Cercozoa;	Eukaryota;Cercozoa;Cercozoa_unclassified;Cercozoa_unclassified;Cercozoa_unclassified;Cercozoa_unclassified	3	9.92447e-06	Cercozoa	EU371397,EF100245	0.930931,0.927928	NCBI Hits Summary
OTU864	Unclassified;	Eukaryota;SAR;Alveolata;	Eukaryota;Eukaryota_unclassified;Eukaryota_unclassified;Eukaryota_unclassified;Eukaryota_unclassified;Eukaryota_unclassified	3	1.48867e-05	Eukaryota_unclassified	AY829526,EU162617	0.944444,0.932099	NCBI Hits Summary
OTU867	Unclassified;	Unclassified;	Eukaryota;Eukaryota_unclassified;Eukaryota_unclassified;Eukaryota_unclassified;Eukaryota_unclassified;Eukaryota_unclassified	3	9.92447e-06	Eukaryota_unclassified			NCBI Hits Summary
OTU869	Unclassified;	Unclassified;	Eukaryota;Eukaryota_unclassified;Eukaryota_unclassified;Eukaryota_unclassified;Eukaryota_unclassified;Eukaryota_unclassified	3	9.92447e-06	Eukaryota_unclassified			NCBI Hits Summary
OTU872	Eukaryota;Alveolata;Ciliophora;Intramacronucleata;	Eukaryota;SAR;Alveolata;Ciliophora;Intramacronucleata;Conthreep;Oligohymenophorea;Peniculia;	Eukaryota;Ciliophora;Intramacronucleata;Conthreep;Oligohymenophorea;Stokesia	3	1.98489e-05	Ciliophora	HM030738,KT461932,LN870026,KJ475296	0.959752,0.947368,0.93808,0.93808	NCBI Hits Summary
OTU873	Eukaryota;Fungi;Fungi incertae sedis;Chytridiomycota;	Eukaryota;Amorphea;Obazoa;Opisthokonta;Nucletmycea;Fungi;Chytridiomycota;Incertae Sedis;Chytridiomycetes;	Eukaryota;Chytridiomycota;Chytridiomycetes;Chytridiomycetes_unclassified;Chytridiomycetes_unclassified;Chytridiomycetes_unclassified	3	2.97734e-05	Chytridiomycota	AY635830,GQ995335,GQ995332	0.926829,0.917683,0.917683	NCBI Hits Summary
OTU874	Unclassified;	Unclassified;	Eukaryota;Eukaryota_unclassified;Eukaryota_unclassified;Eukaryota_unclassified;Eukaryota_unclassified;Eukaryota_unclassified	3	4.96224e-06	Eukaryota_unclassified			NCBI Hits Summary
OTU875	Eukaryota;	Eukaryota;SAR;Stramenopiles;Ochrophyta;Diatomea;Bacillariophytina;Bacillariophyceae;	Eukaryota;Diatomea;Bacillariophyceae;Bacillariophyceae_or;Bacillariophyceae_fa;Bacillariophyceae_fa_unclassified	3	1.98489e-05	Bacillariophyceae	KX120720,KC771145,EF585586,KC771194,AM502022,AJ535147,KJ961660	0.978528,0.969325,0.966258,0.966258,0.966258,0.966258,0.966258	NCBI Hits Summary
OTU877	Eukaryota;	Eukaryota;SAR;Rhizaria;Cercozoa;Thecofilosea;	Eukaryota;Cercozoa;Cercozoa_unclassified;Cercozoa_unclassified;Cercozoa_unclassified;Cercozoa_unclassified	3	1.98489e-05	Cercozoa	FJ824124,AB275046	0.915663,0.915663	NCBI Hits Summary
OTU883	Eukaryota;	Eukaryota;SAR;Stramenopiles;Ochrophyta;Dictyochophyceae;Pedinellales;	Eukaryota;Ochrophyta_ph;Dictyochophyceae;Pedinellales;Pedinellales_fa;Pedinellales_ge	3	4.96224e-06	Dictyochophyceae	DQ647512,KP404878,JN090870	0.939394,0.939394,0.939394	NCBI Hits Summary
OTU884	Unclassified;	Unclassified;	Eukaryota;Eukaryota_unclassified;Eukaryota_unclassified;Eukaryota_unclassified;Eukaryota_unclassified;Eukaryota_unclassified	3	4.46601e-05	Eukaryota_unclassified			NCBI Hits Summary
OTU889	Eukaryota;	Eukaryota;SAR;Stramenopiles;Ochrophyta;Eustigmatophyceae;Eustigmatales;	Eukaryota;Ochrophyta_ph;Eustigmatophyceae;Eustigmatales;Eustigmatales_fa;Nannochloropsis	3	4.96224e-06	Eustigmatophyceae	GQ122355,AF045042	0.956923,0.956923	NCBI Hits Summary
OTU891	Unclassified;	Unclassified;	Eukaryota;Diatomea;Diatomea_unclassified;Diatomea_unclassified;Diatomea_unclassified;Diatomea_unclassified	3	4.96224e-06	Bacillariophyceae			NCBI Hits Summary
OTU893	Eukaryota;environmental samples;	Eukaryota;SAR;Rhizaria;Cercozoa;Thecofilosea;uncultured;	Eukaryota;Eukaryota_unclassified;Eukaryota_unclassified;Eukaryota_unclassified;Eukaryota_unclassified;Eukaryota_unclassified	3	4.96224e-06	Cercozoa	JN090868	0.909366	NCBI Hits Summary
OTU921	Unclassified;	Unclassified;	Eukaryota;Diatomea;Diatomea_unclassified;Diatomea_unclassified;Diatomea_unclassified;Diatomea_unclassified	3	2.48112e-05	Bacillariophyceae			NCBI Hits Summary
OTU928	Unclassified;	Eukaryota;SAR;Stramenopiles;Ochrophyta;Chrysophyceae;	Eukaryota;Ochrophyta_ph;Chrysophyceae;Chrysophyceae_unclassified;Chrysophyceae_unclassified;Chrysophyceae_unclassified	3	9.92447e-06	Chrysophyceae	EF165134,M55285	0.954268,0.942073	NCBI Hits Summary
OTU930	Eukaryota;	Eukaryota;SAR;Alveolata;	Eukaryota;Dinoflagellata;Dinophyceae;Dinophyceae_unclassified;Dinophyceae_unclassified;Dinophyceae_unclassified	3	9.92447e-06	Dinoflagellata	DQ103862,KJ758255,JN090875,KJ758066,FN557541,KJ763731,KJ762965	0.957317,0.954268,0.954268,0.954268,0.954268,0.951219,0.951219	NCBI Hits Summary
OTU976	Eukaryota;Stramenopiles;Bacillariophyta;Fragilariophyceae;Fragilariophycidae;	Eukaryota;SAR;Stramenopiles;Ochrophyta;Diatomea;Coscinodiscophytina;Fragilariales;Fragilaria;	Eukaryota;Diatomea;Coscinodiscophytina_cl;Fragilariales;Fragilariales_fa;Fragilariales_fa_unclassified	3	9.92447e-06	Bacillariophyceae	EF465469,AJ971376,AM497722,EF465478,AJ535137,AM497738,EF423405,AM497721	0.948012,0.948012,0.948012,0.948012,0.948012,0.948012,0.944954,0.944954	NCBI Hits Summary
OTU1009	Eukaryota;	Eukaryota;Archaeplastida;Chloroplastida;Chlorophyta;Chlorophyceae;	Eukaryota;Eukaryota_unclassified;Eukaryota_unclassified;Eukaryota_unclassified;Eukaryota_unclassified;Eukaryota_unclassified	3	1.48867e-05	Chlorophyta	AY082979	0.969419	NCBI Hits Summary
OTU1043	Eukaryota;	Eukaryota;SAR;Alveolata;Ciliophora;Intramacronucleata;Spirotrichea;	Eukaryota;Ciliophora;Intramacronucleata;Spirotrichea;Choreotrichia;Codonellopsis	3	1.48867e-05	Ciliophora	KU715776,KJ758267,EU399529,KY874005,LN869974,HM581790,JQ924053	0.918495,0.918495,0.912226,0.912226,0.912226,0.912226,0.912226	NCBI Hits Summary
OTU1051	Eukaryota;Stramenopiles;	Eukaryota;SAR;Stramenopiles;Ochrophyta;Diatomea;Bacillariophytina;Mediophyceae;Thalassiosira;	Eukaryota;Diatomea;Mediophyceae;Mediophyceae_or;Mediophyceae_fa;Stephanodiscus	3	1.48867e-05	Bacillariophyceae	AM050629,DQ093366,JQ782074,AB831890,JQ781887,GU823614,AJ810854	0.94864,0.94864,0.945619,0.945619,0.945619,0.942598,0.942598	NCBI Hits Summary
OTU1160	Eukaryota;Stramenopiles;Bacillariophyta;Fragilariophyceae;Fragilariophycidae;	Eukaryota;SAR;Stramenopiles;Ochrophyta;Diatomea;	Eukaryota;Diatomea;Diatomea_unclassified;Diatomea_unclassified;Diatomea_unclassified;Diatomea_unclassified	3	9.92447e-06	Bacillariophyceae	EF465465,EF423403	0.969512,0.966463	NCBI Hits Summary
OTU1190	Unclassified;	Unclassified;	Eukaryota;Eukaryota_unclassified;Eukaryota_unclassified;Eukaryota_unclassified;Eukaryota_unclassified;Eukaryota_unclassified	3	9.92447e-06	Eukaryota_unclassified			NCBI Hits Summary
OTU1195	Eukaryota;	Eukaryota;SAR;Alveolata;	Eukaryota;Eukaryota_unclassified;Eukaryota_unclassified;Eukaryota_unclassified;Eukaryota_unclassified;Eukaryota_unclassified	3	4.96224e-06	Eukaryota_unclassified	AF022196,DQ103871,EF526865,KJ758547,KJ757985,KJ758254,KJ757452,KJ759537	0.915663,0.915663,0.915663,0.915663,0.912651,0.912651,0.912651,0.912651	NCBI Hits Summary
OTU1205	Eukaryota;environmental samples;	Eukaryota;SAR;Alveolata;	Eukaryota;Dinoflagellata;Dinophyceae;Gymnodiniphycidae;Gymnodinium_clade;Gymnodinium_clade_unclassified	3	4.96224e-06	Dinoflagellata	KJ758547,DQ103871,KJ759537,KJ758214,KJ757985,KJ757452,AF022196,KJ759489	0.945455,0.945455,0.942424,0.942424,0.942424,0.942424,0.942424,0.942424	NCBI Hits Summary
OTU1214	Eukaryota;environmental samples;	Eukaryota;SAR;Alveolata;	Eukaryota;Dinoflagellata;Dinophyceae;Gymnodiniphycidae;Gymnodiniphycidae_unclassified;Gymnodiniphycidae_unclassified	3	4.96224e-06	Dinoflagellata	KJ758159,DQ103871,KJ759489,KJ758137,KJ758254,AF022196,KJ757784	0.923077,0.92,0.916923,0.916923,0.916923,0.916923,0.916923	NCBI Hits Summary
OTU1234	Eukaryota;	Eukaryota;SAR;Alveolata;	Eukaryota;Eukaryota_unclassified;Eukaryota_unclassified;Eukaryota_unclassified;Eukaryota_unclassified;Eukaryota_unclassified	3	1.48867e-05	Eukaryota_unclassified	KJ759410,KC771146,KJ763064,LC054949,KJ758195,KJ757885,KJ760672	0.923077,0.923077,0.92,0.92,0.92,0.916923,0.916923	NCBI Hits Summary
OTU1258	Eukaryota;	Eukaryota;SAR;Stramenopiles;Ochrophyta;Diatomea;	Eukaryota;Diatomea;Coscinodiscophytina_cl;Coscinodiscophytina_or;Melosirids;Aulacoseira	3	1.98489e-05	Bacillariophyceae	AY121820	0.945455	NCBI Hits Summary
OTU1270	Eukaryota;Stramenopiles;	Eukaryota;SAR;Stramenopiles;Ochrophyta;Eustigmatophyceae;Eustigmatales;Nannochloropsis;	Eukaryota;Ochrophyta_ph;Eustigmatophyceae;Eustigmatales;Eustigmatales_fa;Nannochloropsis	3	4.96224e-06	Eustigmatophyceae	AF045042,GQ122355,KC594687	0.953704,0.953704,0.950617	NCBI Hits Summary
OTU1272	Unclassified;	Eukaryota;SAR;Alveolata;Ciliophora;Intramacronucleata;Spirotrichea;Oligotrichia;	Eukaryota;Ciliophora;Intramacronucleata;Spirotrichea;Spirotrichea_unclassified;Spirotrichea_unclassified	3	4.96224e-06	Ciliophora	FPLK01002665,KJ762027	0.931464,0.925234	NCBI Hits Summary
OTU720	Eukaryota;Stramenopiles;	Eukaryota;SAR;Stramenopiles;Ochrophyta;Diatomea;Bacillariophytina;Mediophyceae;Thalassiosira;	Eukaryota;Diatomea;Mediophyceae;Mediophyceae_or;Mediophyceae_fa;Mediophyceae_fa_unclassified	2	4.96224e-06	Bacillariophyceae	DQ093366,LC189086,EU050968,AB831890,AM050629,JQ782074,HM991689	0.957704,0.957704,0.954683,0.954683,0.954683,0.954683,0.951662	NCBI Hits Summary
OTU743	Eukaryota;environmental samples;	Eukaryota;SAR;Alveolata;	Eukaryota;Eukaryota_unclassified;Eukaryota_unclassified;Eukaryota_unclassified;Eukaryota_unclassified;Eukaryota_unclassified	2	9.92447e-06	Eukaryota_unclassified	KJ762691,KJ757950,GU819725,KJ762908,KJ762871,KJ762900,KJ763359	0.939024,0.939024,0.935976,0.932927,0.932927,0.932927,0.932927	NCBI Hits Summary
OTU797	Unclassified;	Unclassified;	Eukaryota;Dinoflagellata;Dinophyceae;Dinophyceae_unclassified;Dinophyceae_unclassified;Dinophyceae_unclassified	2	4.96224e-06	Dinoflagellata			NCBI Hits Summary
OTU895	Unclassified;	Unclassified;	Eukaryota;Eukaryota_unclassified;Eukaryota_unclassified;Eukaryota_unclassified;Eukaryota_unclassified;Eukaryota_unclassified	2	2.48112e-05	Eukaryota_unclassified			NCBI Hits Summary
OTU896	Unclassified;	Eukaryota;SAR;Alveolata;Ciliophora;Intramacronucleata;Spirotrichea;Oligotrichia;	Eukaryota;Ciliophora;Intramacronucleata;Spirotrichea;Oligotrichia;Strombidium	2	4.96224e-06	Ciliophora	DQ487198,FPLK01000763	0.946708,0.931035	NCBI Hits Summary
OTU897	Eukaryota;	Eukaryota;SAR;Alveolata;	Eukaryota;Dinoflagellata;Dinophyceae;Dinophyceae_unclassified;Dinophyceae_unclassified;Dinophyceae_unclassified	2	#N/A	Dinoflagellata	KJ758547,AF022196,DQ103871,KJ757985,FJ947037,KJ757452,KJ758254,KJ759537	0.913846,0.913846,0.913846,0.910769,0.910769,0.910769,0.910769,0.910769	NCBI Hits Summary
OTU902	Unclassified;	Unclassified;	Eukaryota;Eukaryota_unclassified;Eukaryota_unclassified;Eukaryota_unclassified;Eukaryota_unclassified;Eukaryota_unclassified	2	2.48112e-05	Eukaryota_unclassified			NCBI Hits Summary
OTU905	Eukaryota;Stramenopiles;Bacillariophyta;Fragilariophyceae;Fragilariophycidae;	Eukaryota;SAR;Stramenopiles;Ochrophyta;Diatomea;Coscinodiscophytina;Fragilariales;	Eukaryota;Diatomea;Coscinodiscophytina_cl;Fragilariales;Fragilariales_fa;Ulnaria	2	2.97734e-05	Bacillariophyceae	EF423422,EF465476	0.963303,0.963303	NCBI Hits Summary
OTU906	Eukaryota;Stramenopiles;Bacillariophyta;Fragilariophyceae;Fragilariophycidae;	Eukaryota;SAR;Stramenopiles;Ochrophyta;Diatomea;Coscinodiscophytina;Fragilariales;	Eukaryota;Diatomea;Coscinodiscophytina_cl;Fragilariales;Fragilariales_fa;Ulnaria	2	2.97734e-05	Bacillariophyceae	EF423422,EF465476	0.953125,0.953125	NCBI Hits Summary
OTU907	Unclassified;	Unclassified;	Eukaryota;Eukaryota_unclassified;Eukaryota_unclassified;Eukaryota_unclassified;Eukaryota_unclassified;Eukaryota_unclassified	2	2.48112e-05	Eukaryota_unclassified			NCBI Hits Summary
OTU912	Eukaryota;environmental samples;	Eukaryota;SAR;Alveolata;	Eukaryota;Dinoflagellata;Dinoflagellata_unclassified;Dinoflagellata_unclassified;Dinoflagellata_unclassified;Dinoflagellata_unclassified	2	4.96224e-06	Dinoflagellata	KJ763031,KJ763108,KJ762900,KJ762932,KJ762908,KJ762871,KJ763365,KJ763359	0.971246,0.971246,0.971246,0.971246,0.971246,0.971246,0.971246,0.971246	NCBI Hits Summary
OTU913	Eukaryota;	Eukaryota;SAR;Alveolata;Ciliophora;Intramacronucleata;Conthreep;Prostomatea;Cryptocaryon;	Eukaryota;Ciliophora;Intramacronucleata;Conthreep;Conthreep_unclassified;Conthreep_unclassified	2	1.98489e-05	Ciliophora	KC771341	0.960265	NCBI Hits Summary
OTU914	Unclassified;	Unclassified;	Eukaryota;Eukaryota_unclassified;Eukaryota_unclassified;Eukaryota_unclassified;Eukaryota_unclassified;Eukaryota_unclassified	2	1.48867e-05	Eukaryota_unclassified			NCBI Hits Summary
OTU915	Unclassified;	Unclassified;	Eukaryota;Eukaryota_unclassified;Eukaryota_unclassified;Eukaryota_unclassified;Eukaryota_unclassified;Eukaryota_unclassified	2	2.97734e-05	Eukaryota_unclassified			NCBI Hits Summary
OTU916	Eukaryota;Stramenopiles;Bacillariophyta;Fragilariophyceae;Fragilariophycidae;	Eukaryota;SAR;Stramenopiles;Ochrophyta;Diatomea;Coscinodiscophytina;Fragilariales;	Eukaryota;Diatomea;Coscinodiscophytina_cl;Fragilariales;Fragilariales_fa;Ulnaria	2	1.48867e-05	Bacillariophyceae	EF423422,EF465476	0.966258,0.966258	NCBI Hits Summary
OTU917	Unclassified;	Eukaryota;SAR;Alveolata;Ciliophora;Intramacronucleata;Litostomatea;Haptoria;	Eukaryota;Ciliophora;Intramacronucleata;Litostomatea;Haptoria;Haptoria_unclassified	2	9.92447e-06	Ciliophora	FPLS01013121	0.986667	NCBI Hits Summary
OTU919	Eukaryota;Stramenopiles;Bacillariophyta;Coscinodiscophyceae;	Eukaryota;SAR;Stramenopiles;Ochrophyta;Diatomea;	Eukaryota;Diatomea;Coscinodiscophytina_cl;Coscinodiscophytina_or;Melosirids;Aulacoseira	2	4.96224e-06	Bacillariophyceae	AY121820	0.990506	NCBI Hits Summary
OTU922	Eukaryota;	Eukaryota;SAR;Alveolata;	Eukaryota;Dinoflagellata;Dinophyceae;Dinophyceae_unclassified;Dinophyceae_unclassified;Dinophyceae_unclassified	2	4.96224e-06	Dinoflagellata	DQ103871,KJ759489,KJ759537,KJ757985,KJ758547,AF022196,DQ103860,KJ758159	0.960486,0.960486,0.960486,0.960486,0.960486,0.960486,0.957447,0.957447	NCBI Hits Summary
OTU923	Eukaryota;	Eukaryota;SAR;Alveolata;	Eukaryota;Dinoflagellata;Dinophyceae;Dinophyceae_unclassified;Dinophyceae_unclassified;Dinophyceae_unclassified	2	4.96224e-06	Dinoflagellata	KC771146,LC054949	0.960606,0.954545	NCBI Hits Summary
OTU925	Eukaryota;	Eukaryota;Archaeplastida;Chloroplastida;Chlorophyta;Chlorophyceae;	Eukaryota;Chlorophyta_ph;Chlorophyceae;Chlorophyceae_or;Chlorophyceae_fa;Chlorophyceae_ge	2	4.96224e-06	Chlorophyta	FR865531	0.996942	NCBI Hits Summary
OTU926	Eukaryota;	Eukaryota;SAR;Stramenopiles;Ochrophyta;Diatomea;Bacillariophytina;Mediophyceae;Thalassiosira;	Eukaryota;Diatomea;Mediophyceae;Mediophyceae_or;Mediophyceae_fa;Mediophyceae_fa_unclassified	2	9.92447e-06	Bacillariophyceae	JQ782059,KJ757896,KJ758228,KJ758081,KJ758126,KC771208,JQ782078,KJ757932	0.951662,0.94864,0.94864,0.94864,0.94864,0.94864,0.94864,0.94864	NCBI Hits Summary
OTU927	Eukaryota;	Eukaryota;SAR;Alveolata;Dinoflagellata;Dinophyceae;	Eukaryota;Dinoflagellata;Dinophyceae;Dinophyceae_unclassified;Dinophyceae_unclassified;Dinophyceae_unclassified	2	9.92447e-06	Dinoflagellata	DQ103862,FN557541,AY121856,AY251288	0.963636,0.960606,0.957576,0.957576	NCBI Hits Summary
OTU929	Eukaryota;	Eukaryota;SAR;Alveolata;	Eukaryota;Dinoflagellata;Dinophyceae;Peridiniphycidae_or;Thoracosphaeraceae;Scrippsiella	2	4.96224e-06	Dinoflagellata	KC771146,KJ763731,KJ758116,KJ760672,KR535601,KJ763230,KJ763426	0.996815,0.984076,0.984076,0.984076,0.984076,0.984076,0.984076	NCBI Hits Summary
OTU931	Eukaryota;Fungi;Dikarya;Ascomycota;Pezizomycotina;	Eukaryota;Amorphea;Obazoa;Opisthokonta;Nucletmycea;Fungi;Dikarya;Ascomycota;Pezizomycotina;	Eukaryota;Ascomycota;Arthoniomycetes;uncultured;uncultured_fa;uncultured_ge	2	9.92447e-06	Ascomycota	GU250330,JFDN01000179	0.96997,0.957958	NCBI Hits Summary
OTU932	Eukaryota;	Eukaryota;SAR;Alveolata;	Eukaryota;Dinoflagellata;Dinophyceae;Peridiniphycidae_or;Thoracosphaeraceae;Thoracosphaeraceae_ge	2	4.96224e-06	Dinoflagellata	JN090875,KJ757407,KJ758039,AY590477,KJ763588,KJ757312,AY251288	0.957576,0.948485,0.948485,0.945455,0.945455,0.945455,0.945455	NCBI Hits Summary
OTU933	Eukaryota;Stramenopiles;Bacillariophyta;Coscinodiscophyceae;Coscinodiscophycidae;Aulacoseiraceae;Aulacoseira;	Eukaryota;SAR;Stramenopiles;Ochrophyta;Diatomea;Coscinodiscophytina;Melosirids;Aulacoseira;	Eukaryota;Diatomea;Coscinodiscophytina_cl;Coscinodiscophytina_or;Melosirids;Aulacoseira	2	1.48867e-05	Bacillariophyceae	AY121820	0.930303	NCBI Hits Summary
OTU935	Eukaryota;	Eukaryota;SAR;Alveolata;	Eukaryota;Dinoflagellata;Dinophyceae;Dinophyceae_unclassified;Dinophyceae_unclassified;Dinophyceae_unclassified	2	9.92447e-06	Dinoflagellata	KC771146,KJ758066,KR535601,JF791101,LC054949,KJ763731,KJ763426	0.951515,0.942424,0.939394,0.939394,0.939394,0.939394,0.939394	NCBI Hits Summary
OTU936	Unclassified;	Unclassified;	Eukaryota;Eukaryota_unclassified;Eukaryota_unclassified;Eukaryota_unclassified;Eukaryota_unclassified;Eukaryota_unclassified	2	9.92447e-06	Eukaryota_unclassified			NCBI Hits Summary
OTU937	Eukaryota;environmental samples;	Eukaryota;SAR;Rhizaria;Cercozoa;Thecofilosea;	Eukaryota;Eukaryota_unclassified;Eukaryota_unclassified;Eukaryota_unclassified;Eukaryota_unclassified;Eukaryota_unclassified	2	9.92447e-06	Cercozoa	KC771151	0.954819	NCBI Hits Summary
OTU938	Eukaryota;Stramenopiles;Bacillariophyta;Fragilariophyceae;Fragilariophycidae;	Eukaryota;SAR;Stramenopiles;Ochrophyta;Diatomea;Coscinodiscophytina;Fragilariales;Fragilaria;	Eukaryota;Diatomea;Coscinodiscophytina_cl;Fragilariales;Fragilariales_fa;Fragilariales_fa_unclassified	2	1.48867e-05	Bacillariophyceae	AJ535137,EF465469,EF465478,AM497738,AM497722,AM497721,EF465492	0.944954,0.944954,0.944954,0.944954,0.944954,0.941896,0.941896	NCBI Hits Summary
OTU939	Unclassified;	Unclassified;	Eukaryota;Eukaryota_unclassified;Eukaryota_unclassified;Eukaryota_unclassified;Eukaryota_unclassified;Eukaryota_unclassified	2	9.92447e-06	Eukaryota_unclassified			NCBI Hits Summary
OTU942	Eukaryota;Viridiplantae;Chlorophyta;Ulvophyceae;	Eukaryota;Archaeplastida;Chloroplastida;Chlorophyta;Ulvophyceae;	Eukaryota;Chlorophyta_ph;Ulvophyceae;Ulvophyceae_or;Ulvophyceae_fa;Ulvophyceae_ge	2	9.92447e-06	Chlorophyta	MF034602,Z47996,FR865654,Z28970,MF034601	0.938462,0.938462,0.938462,0.923077,0.923077	NCBI Hits Summary
OTU943	Eukaryota;Alveolata;Ciliophora;Intramacronucleata;Spirotrichea;Stichotrichia;	Eukaryota;SAR;Alveolata;Ciliophora;Intramacronucleata;Spirotrichea;Hypotrichia;	Eukaryota;Ciliophora;Intramacronucleata;Spirotrichea;Hypotrichia;Pseudourostyla	2	9.92447e-06	Ciliophora	DQ019318,GU942567,DQ022065,GU942569,FJ775725	0.968944,0.968944,0.968944,0.968944,0.968944	NCBI Hits Summary
OTU944	Eukaryota;Fungi;Fungi incertae sedis;Chytridiomycota;environmental samples;	Eukaryota;Amorphea;Obazoa;Opisthokonta;Nucletmycea;Fungi;Chytridiomycota;Incertae Sedis;Chytridiomycetes;Rhizophydiales;	Eukaryota;Chytridiomycota;Chytridiomycetes;Rhizophydiales;Rhizophydiales_unclassified;Rhizophydiales_unclassified	2	9.92447e-06	Chytridiomycota	HQ191383	0.927492	NCBI Hits Summary
OTU945	Eukaryota;Stramenopiles;Bacillariophyta;	Eukaryota;SAR;Stramenopiles;Ochrophyta;Diatomea;	Eukaryota;Diatomea;Bacillariophyceae;Bacillariophyceae_or;Bacillariophyceae_fa;Bacillariophyceae_fa_unclassified	2	9.92447e-06	Bacillariophyceae	GQ219689,AM235382,AB430600	0.93921,0.933131,0.933131	NCBI Hits Summary
OTU946	Unclassified;	Unclassified;	Eukaryota;Eukaryota_unclassified;Eukaryota_unclassified;Eukaryota_unclassified;Eukaryota_unclassified;Eukaryota_unclassified	2	9.92447e-06	Eukaryota_unclassified			NCBI Hits Summary
OTU951	Eukaryota;	Eukaryota;SAR;Alveolata;Ciliophora;Intramacronucleata;Litostomatea;	Eukaryota;Ciliophora;Intramacronucleata;Litostomatea;Haptoria;Didinium	2	9.92447e-06	Ciliophora	JQ723965,MG264144	0.970199,0.963576	NCBI Hits Summary
OTU952	Eukaryota;	Eukaryota;Haptophyta;Prymnesiophyceae;Prymnesiales;	Eukaryota;Prymnesiophyceae;Prymnesiophyceae_cl;Prymnesiales;Prymnesiales_fa;OLI16029	2	9.92447e-06	Haptophyta/Prymnesiophyceae	KJ762928,KP404866,AF107083,KJ759445,KF129663	0.981928,0.981928,0.975904,0.975904,0.975904	NCBI Hits Summary
OTU953	Eukaryota;Fungi;Dikarya;Basidiomycota;Agaricomycotina;Agaricomycetes;	Eukaryota;Amorphea;Obazoa;Opisthokonta;Nucletmycea;Fungi;Dikarya;Basidiomycota;Agaricomycotina;Agaricomycetes;	Eukaryota;Basidiomycota;Agaricomycetes;Agaricomycetes_unclassified;Agaricomycetes_unclassified;Agaricomycetes_unclassified	2	9.92447e-06	Basidiomycota	U63471,AY654888	0.994048,0.970238	NCBI Hits Summary
OTU954	Eukaryota;Stramenopiles;Bacillariophyta;Fragilariophyceae;Fragilariophycidae;	Eukaryota;SAR;Stramenopiles;Ochrophyta;Diatomea;Coscinodiscophytina;Fragilariales;Fragilaria;	Eukaryota;Diatomea;Coscinodiscophytina_cl;Fragilariales;Fragilariales_fa;Fragilariales_fa_unclassified	2	9.92447e-06	Bacillariophyceae	AM497722,AJ535137,EF465469,EF465478,AM497738,EF423405,AM497721	0.966361,0.966361,0.966361,0.966361,0.966361,0.963303,0.963303	NCBI Hits Summary
OTU956	Eukaryota;	Eukaryota;SAR;Alveolata;Dinoflagellata;Dinophyceae;Peridiniphycidae;	Eukaryota;Dinoflagellata;Dinophyceae;Peridiniphycidae_or;Thoracosphaeraceae;Thoracosphaeraceae_ge	2	9.92447e-06	Dinoflagellata	JN090875,AY251288	0.966565,0.954407	NCBI Hits Summary
OTU957	Eukaryota;Viridiplantae;Chlorophyta;Chlorophyceae;Chaetophorales;	Eukaryota;Archaeplastida;Chloroplastida;Chlorophyta;Chlorophyceae;Chaetophorales;	Eukaryota;Eukaryota_unclassified;Eukaryota_unclassified;Eukaryota_unclassified;Eukaryota_unclassified;Eukaryota_unclassified	2	9.92447e-06	Chlorophyta	FN824371,U83130,FR865749	0.932927,0.932927,0.932927	NCBI Hits Summary
OTU959	Eukaryota;Stramenopiles;Bacillariophyta;Fragilariophyceae;Fragilariophycidae;Licmophorales;Ulnariaceae;Tabularia;	Eukaryota;SAR;Stramenopiles;Ochrophyta;Diatomea;Coscinodiscophytina;Fragilariales;Tabularia;	Eukaryota;Diatomea;Coscinodiscophytina_cl;Fragilariales;Fragilariales_fa;Fragilariales_fa_unclassified	2	9.92447e-06	Bacillariophyceae			NCBI Hits Summary
OTU961	Eukaryota;Euglenozoa;Diplonemida;	Eukaryota;Discoba;Discicristata;Euglenozoa;Diplonemea;	Eukaryota;Eukaryota_unclassified;Eukaryota_unclassified;Eukaryota_unclassified;Eukaryota_unclassified;Eukaryota_unclassified	2	9.92447e-06	Eukaryota_unclassified	MF422200	0.924198	NCBI Hits Summary
OTU962	Eukaryota;Viridiplantae;Chlorophyta;Ulvophyceae;	Eukaryota;Archaeplastida;Chloroplastida;Chlorophyta;Ulvophyceae;	Eukaryota;Eukaryota_unclassified;Eukaryota_unclassified;Eukaryota_unclassified;Eukaryota_unclassified;Eukaryota_unclassified	2	9.92447e-06	Chlorophyta	MF034602,Z47996,FR865654,Z28970,MF034601	0.941718,0.941718,0.941718,0.92638,0.92638	NCBI Hits Summary
OTU963	Unclassified;	Eukaryota;SAR;Stramenopiles;Ochrophyta;Chrysophyceae;	Eukaryota;Ochrophyta_ph;Chrysophyceae;Chrysophyceae_unclassified;Chrysophyceae_unclassified;Chrysophyceae_unclassified	2	9.92447e-06	Chrysophyceae	FPLS01038393,M87331,U73229,M87332,MG674911	0.917683,0.905488,0.905488,0.905488,0.905488	NCBI Hits Summary
OTU964	Unclassified;	Unclassified;	Eukaryota;Eukaryota_unclassified;Eukaryota_unclassified;Eukaryota_unclassified;Eukaryota_unclassified;Eukaryota_unclassified	2	9.92447e-06	Eukaryota_unclassified			NCBI Hits Summary
OTU965	Eukaryota;environmental samples;	Eukaryota;SAR;Alveolata;Dinoflagellata;Dinophyceae;Gymnodiniphycidae;Kareniaceae;Karlodinium;	Eukaryota;Dinoflagellata;Dinophyceae;Dinophyceae_unclassified;Dinophyceae_unclassified;Dinophyceae_unclassified	2	9.92447e-06	Dinoflagellata			NCBI Hits Summary
OTU966	Eukaryota;Fungi;Dikarya;Ascomycota;Saccharomycotina;Saccharomycetes;Saccharomycetales;Debaryomycetaceae;Debaryomyces;	Eukaryota;Amorphea;Obazoa;Opisthokonta;Nucletmycea;Fungi;Dikarya;Ascomycota;Saccharomycotina;Saccharomycetes;Saccharomycetales;Debaryomycetaceae;Debaryomyces;	Eukaryota;Ascomycota;Saccharomycetes;Saccharomycetales;Debaryomycetaceae;Debaryomyces	2	9.92447e-06	Ascomycota	AB054272,AB054270,AB013568,AB013525,AB013590,GQ458041,X62649,X83821,JQ698910	0.996988,0.996988,0.996988,0.996988,0.996988,0.996988,0.996988,0.996988,0.996988	NCBI Hits Summary
OTU967	Eukaryota;	Eukaryota;Archaeplastida;Chloroplastida;Chlorophyta;Chlorophyceae;	Eukaryota;Chlorophyta_ph;Chlorophyceae;Chlorophyceae_or;Chlorophyceae_fa;Chlorophyceae_ge	2	9.92447e-06	Chlorophyta	AB695511,KJ635669	0.966463,0.966463	NCBI Hits Summary
OTU969	Eukaryota;	Eukaryota;SAR;Alveolata;	Eukaryota;Dinoflagellata;Dinophyceae;Dinophyceae_unclassified;Dinophyceae_unclassified;Dinophyceae_unclassified	2	4.96224e-06	Dinoflagellata	JN090875,KJ757407,KJ762951,KJ763588,KJ758256	0.960245,0.957187,0.954128,0.954128,0.954128	NCBI Hits Summary
OTU971	Unclassified;	Unclassified;	Eukaryota;Eukaryota_unclassified;Eukaryota_unclassified;Eukaryota_unclassified;Eukaryota_unclassified;Eukaryota_unclassified	2	9.92447e-06	Eukaryota_unclassified			NCBI Hits Summary
OTU974	Eukaryota;	Eukaryota;SAR;Stramenopiles;Ochrophyta;Chrysophyceae;	Eukaryota;Ochrophyta_ph;Chrysophyceae;Chrysophyceae_unclassified;Chrysophyceae_unclassified;Chrysophyceae_unclassified	2	9.92447e-06	Chrysophyceae	EF165134,AB695532	0.954268,0.945122	NCBI Hits Summary
OTU975	Eukaryota;	Eukaryota;SAR;Alveolata;Dinoflagellata;Dinophyceae;Gymnodiniphycidae;Suessiaceae;Symbiodinium;	Eukaryota;Dinoflagellata;Dinophyceae;Dinophyceae_unclassified;Dinophyceae_unclassified;Dinophyceae_unclassified	2	4.96224e-06	Dinoflagellata	GU067954,GU290072	0.935185,0.92284	NCBI Hits Summary
OTU977	Eukaryota;	Eukaryota;Amorphea;Obazoa;Opisthokonta;Nucletmycea;Fungi;Chytridiomycota;Incertae Sedis;Chytridiomycetes;	Eukaryota;Chytridiomycota;Chytridiomycetes;Lobulomycetales;Lobulomycetaceae;Lobulomycetaceae_unclassified	2	9.92447e-06	Chytridiomycota	AF164253	0.993994	NCBI Hits Summary
OTU978	Unclassified;	Unclassified;	Eukaryota;Eukaryota_unclassified;Eukaryota_unclassified;Eukaryota_unclassified;Eukaryota_unclassified;Eukaryota_unclassified	2	9.92447e-06	Eukaryota_unclassified			NCBI Hits Summary
OTU979	Eukaryota;Stramenopiles;Bacillariophyta;Fragilariophyceae;Fragilariophycidae;	Eukaryota;SAR;Stramenopiles;Ochrophyta;Diatomea;Coscinodiscophytina;Fragilariales;	Eukaryota;Diatomea;Coscinodiscophytina_cl;Fragilariales;Fragilariales_fa;Ulnaria	2	9.92447e-06	Bacillariophyceae	EF423422,EF465476	0.960245,0.960245	NCBI Hits Summary
OTU980	Eukaryota;	Eukaryota;SAR;Stramenopiles;Ochrophyta;Chrysophyceae;	Eukaryota;Ochrophyta_ph;Chrysophyceae;Chrysophyceae_unclassified;Chrysophyceae_unclassified;Chrysophyceae_unclassified	2	9.92447e-06	Chrysophyceae	EF185316	0.945687	NCBI Hits Summary
OTU981	Eukaryota;Viridiplantae;Streptophyta;Embryophyta;Tracheophyta;Spermatophyta;Magnoliophyta;Liliopsida;	Eukaryota;Archaeplastida;Chloroplastida;Charophyta;Phragmoplastophyta;Streptophyta;Embryophyta;Tracheophyta;Spermatophyta;Magnoliophyta;Liliopsida;	Eukaryota;Phragmoplastophyta;Embryophyta;Magnoliophyta_or;Magnoliophyta_fa;Magnoliophyta_ge	2	9.92447e-06	Embryophyta	AY165509,AY165508,EF526322	0.997015,0.997015,0.98209	NCBI Hits Summary
OTU983	Unclassified;	Unclassified;	Eukaryota;Eukaryota_unclassified;Eukaryota_unclassified;Eukaryota_unclassified;Eukaryota_unclassified;Eukaryota_unclassified	2	4.96224e-06	Eukaryota_unclassified			NCBI Hits Summary
OTU985	Unclassified;	Unclassified;	Eukaryota;Eukaryota_unclassified;Eukaryota_unclassified;Eukaryota_unclassified;Eukaryota_unclassified;Eukaryota_unclassified	2	1.48867e-05	Eukaryota_unclassified			NCBI Hits Summary
OTU989	Unclassified;	Eukaryota;SAR;Stramenopiles;Ochrophyta;Chrysophyceae;	Eukaryota;Ochrophyta_ph;Chrysophyceae;Chrysophyceae_unclassified;Chrysophyceae_unclassified;Chrysophyceae_unclassified	2	1.48867e-05	Chrysophyceae	FPLL01006794,FPLK01000769,U73222,AY651092,AB749145,GU290102	0.944954,0.938838,0.938838,0.93578,0.93578,0.93578	NCBI Hits Summary
OTU990	Eukaryota;	Eukaryota;SAR;Alveolata;Dinoflagellata;Dinophyceae;Peridiniphycidae;	Eukaryota;Dinoflagellata;Dinophyceae;Peridiniphycidae_or;Thoracosphaeraceae;Thoracosphaeraceae_unclassified	2	1.48867e-05	Dinoflagellata	JN090875,AY590478	0.963526,0.954407	NCBI Hits Summary
OTU991	Unclassified;	Unclassified;	Eukaryota;Labyrinthulomycetes;Labyrinthulomycetes_cl;Labyrinthulomycetes_or;Thraustochytriaceae;Thraustochytriaceae_unclassified	2	9.92447e-06	Labyrinthulomycetes			NCBI Hits Summary
OTU993	Eukaryota;environmental samples;	Eukaryota;SAR;Alveolata;	Eukaryota;Dinoflagellata;Dinophyceae;Dinophyceae_unclassified;Dinophyceae_unclassified;Dinophyceae_unclassified	2	9.92447e-06	Dinoflagellata	KJ757950,KJ762691,KJ763031,KJ759639,KJ759500,KJ762900,KJ762932,KJ763108	0.932927,0.932927,0.929878,0.929878,0.929878,0.929878,0.929878,0.929878	NCBI Hits Summary
OTU994	Eukaryota;environmental samples;	Eukaryota;SAR;Alveolata;	Eukaryota;Eukaryota_unclassified;Eukaryota_unclassified;Eukaryota_unclassified;Eukaryota_unclassified;Eukaryota_unclassified	2	9.92447e-06	Eukaryota_unclassified	KJ762571,KJ757157,KJ762196,AY664946,KJ759327,KJ762277,KJ758255	0.915152,0.912121,0.912121,0.909091,0.909091,0.909091,0.909091	NCBI Hits Summary
OTU995	Eukaryota;Stramenopiles;Bacillariophyta;	Eukaryota;SAR;Stramenopiles;Ochrophyta;Diatomea;	Eukaryota;Diatomea;Diatomea_unclassified;Diatomea_unclassified;Diatomea_unclassified;Diatomea_unclassified	2	9.92447e-06	Bacillariophyceae	AY485450,EF465465,EF423414,JF791076,EF423403,AB430600,JF791075	0.930514,0.924471,0.924471,0.924471,0.924471,0.924471,0.924471	NCBI Hits Summary
OTU996	Eukaryota;environmental samples;	Eukaryota;SAR;Alveolata;	Eukaryota;Dinoflagellata;Dinophyceae;Dinophyceae_unclassified;Dinophyceae_unclassified;Dinophyceae_unclassified	2	9.92447e-06	Dinoflagellata	KJ757950,KJ762691,KJ758503,KJ763479,KJ757938,KJ758000,KJ758274	0.939103,0.939103,0.939103,0.935897,0.935897,0.935897,0.932692	NCBI Hits Summary
OTU997	Eukaryota;Alveolata;	Eukaryota;SAR;Alveolata;Ciliophora;Intramacronucleata;Spirotrichea;Choreotrichia;	Eukaryota;Ciliophora;Intramacronucleata;Spirotrichea;Choreotrichia;Tintinnidium	2	9.92447e-06	Ciliophora	EU162620,KF662622	0.934169,0.902821	NCBI Hits Summary
OTU998	Eukaryota;	Eukaryota;Amorphea;Obazoa;Opisthokonta;Nucletmycea;	Eukaryota;Aphelidea;Aphelidea_cl;Aphelidea_or;Aphelidea_fa;uncultured	2	9.92447e-06	Aphelidea	KX465218	0.960245	NCBI Hits Summary
OTU1001	Eukaryota;	Eukaryota;SAR;Stramenopiles;Ochrophyta;Diatomea;Bacillariophytina;Bacillariophyceae;	Eukaryota;Diatomea;Bacillariophyceae;Bacillariophyceae_or;Bacillariophyceae_fa;Achnanthidium	2	9.92447e-06	Bacillariophyceae	KF959663,KC771197,KC771184,AB430614,KC771181	0.990769,0.978462,0.978462,0.978462,0.978462	NCBI Hits Summary
OTU1003	Eukaryota;Fungi;Dikarya;Ascomycota;	Eukaryota;Amorphea;Obazoa;Opisthokonta;Nucletmycea;Fungi;Dikarya;Ascomycota;Pezizomycotina;Leotiomycetes;Helotiales;	Eukaryota;Ascomycota;Leotiomycetes;Helotiales;Helotiaceae;Tetrachaetum	2	9.92447e-06	Ascomycota	AY357280,AY204606,AY204605	0.98494,0.966867,0.966867	NCBI Hits Summary
OTU1007	Eukaryota;environmental samples;	Eukaryota;SAR;Alveolata;	Eukaryota;Dinoflagellata;Dinophyceae;Dinophyceae_unclassified;Dinophyceae_unclassified;Dinophyceae_unclassified	2	9.92447e-06	Dinoflagellata	KJ762691,KJ757950,KJ757938,KJ758000,KJ759469,KJ762321,KJ762846	0.907975,0.907975,0.904908,0.904908,0.904908,0.901841,0.901841	NCBI Hits Summary
OTU1010	Eukaryota;Alveolata;	Eukaryota;SAR;Alveolata;Ciliophora;Intramacronucleata;Spirotrichea;Hypotrichia;	Eukaryota;Ciliophora;Intramacronucleata;Spirotrichea;Hypotrichia;Halteria	2	9.92447e-06	Ciliophora	DQ244036,DQ244039,AF164137,DQ244040	0.95873,0.95873,0.936508,0.936508	NCBI Hits Summary
OTU1011	Unclassified;	Unclassified;	Eukaryota;Eukaryota_unclassified;Eukaryota_unclassified;Eukaryota_unclassified;Eukaryota_unclassified;Eukaryota_unclassified	2	9.92447e-06	Eukaryota_unclassified			NCBI Hits Summary
OTU1012	Eukaryota;Stramenopiles;Phaeothamniophyceae;	Eukaryota;SAR;Stramenopiles;Ochrophyta;Phaeothamniophyceae;Phaeothamniales;	Eukaryota;Eukaryota_unclassified;Eukaryota_unclassified;Eukaryota_unclassified;Eukaryota_unclassified;Eukaryota_unclassified	2	9.92447e-06	Eukaryota_unclassified	AB365198	0.900901	NCBI Hits Summary
OTU1013	Eukaryota;environmental samples;	Eukaryota;SAR;Alveolata;	Eukaryota;Dinoflagellata;Dinophyceae;Dinophyceae_unclassified;Dinophyceae_unclassified;Dinophyceae_unclassified	2	9.92447e-06	Dinoflagellata	KJ762691,KJ759639,KJ763031,KJ757950,KJ763359,KJ762900,KJ762932,KJ762908,KJ763108	0.929878,0.929878,0.929878,0.929878,0.929878,0.929878,0.929878,0.929878,0.929878	NCBI Hits Summary
OTU1015	Eukaryota;Alveolata;	Eukaryota;SAR;Alveolata;Ciliophora;Intramacronucleata;Spirotrichea;Hypotrichia;	Eukaryota;Ciliophora;Intramacronucleata;Spirotrichea;Hypotrichia;Hypotrichia_unclassified	2	9.92447e-06	Ciliophora	AF164137,EU399529,AF164130,DQ244036,EF024909	0.914827,0.908517,0.908517,0.908517,0.905363	NCBI Hits Summary
OTU1017	Eukaryota;Alveolata;	Eukaryota;SAR;Alveolata;Ciliophora;Intramacronucleata;Spirotrichea;	Eukaryota;Ciliophora;Intramacronucleata;Spirotrichea;Choreotrichia;Tintinnidium	2	9.92447e-06	Ciliophora	EU162620,AMCR01020474,AF508775,AF164121,AF164684	0.933754,0.908517,0.908517,0.908517,0.908517	NCBI Hits Summary
OTU1018	Eukaryota;environmental samples;	Eukaryota;SAR;Alveolata;	Eukaryota;Eukaryota_unclassified;Eukaryota_unclassified;Eukaryota_unclassified;Eukaryota_unclassified;Eukaryota_unclassified	2	9.92447e-06	Eukaryota_unclassified	HM581708,KJ762321,KJ759500,KJ763108,KJ762416,KJ762900,KJ763031,KJ762932,KJ763359	0.917683,0.917683,0.917683,0.917683,0.917683,0.917683,0.917683,0.917683,0.917683	NCBI Hits Summary
OTU1019	Eukaryota;Alveolata;Dinophyceae;	Eukaryota;SAR;Alveolata;Dinoflagellata;Dinophyceae;Gymnodiniphycidae;Gymnodinium clade;	Eukaryota;Dinoflagellata;Dinophyceae;Gymnodiniphycidae;Gymnodinium_clade;Gymnodinium_clade_unclassified	2	9.92447e-06	Dinoflagellata	AB921307,LC027032,LC027036	0.940252,0.918239,0.915094	NCBI Hits Summary
OTU1020	Unclassified;	Unclassified;	Eukaryota;Eukaryota_unclassified;Eukaryota_unclassified;Eukaryota_unclassified;Eukaryota_unclassified;Eukaryota_unclassified	2	9.92447e-06	Eukaryota_unclassified			NCBI Hits Summary
OTU1022	Unclassified;	Unclassified;	Eukaryota;Eukaryota_unclassified;Eukaryota_unclassified;Eukaryota_unclassified;Eukaryota_unclassified;Eukaryota_unclassified	2	9.92447e-06	Eukaryota_unclassified			NCBI Hits Summary
OTU1023	Unclassified;	Eukaryota;SAR;Stramenopiles;Ochrophyta;Chrysophyceae;	Eukaryota;Ochrophyta_ph;Chrysophyceae;Chrysophyceae_unclassified;Chrysophyceae_unclassified;Chrysophyceae_unclassified	2	9.92447e-06	Chrysophyceae	AB749076,MG674911,GU290105,EF024325,CEOE01007823,M55285	0.951219,0.926829,0.926829,0.926829,0.926829,0.923781	NCBI Hits Summary
OTU1024	Eukaryota;Alveolata;Ciliophora;Intramacronucleata;Spirotrichea;Hypotrichia;Euplotida;Euplotidae;Euplotes;	Eukaryota;SAR;Alveolata;Ciliophora;Intramacronucleata;Spirotrichea;Euplotia;Euplotes;	Eukaryota;Eukaryota_unclassified;Eukaryota_unclassified;Eukaryota_unclassified;Eukaryota_unclassified;Eukaryota_unclassified	2	9.92447e-06	Ciliophora	LN870038	0.920354	NCBI Hits Summary
OTU1025	Eukaryota;environmental samples;	Eukaryota;SAR;Alveolata;	Eukaryota;Dinoflagellata;Dinophyceae;Dinophyceae_unclassified;Dinophyceae_unclassified;Dinophyceae_unclassified	2	9.92447e-06	Dinoflagellata	KJ757950,KJ762691,KJ762846,KJ763097,KJ763479,KJ758000,FLLY01000077,KJ759469	0.923781,0.923781,0.923781,0.920732,0.920732,0.920732,0.920732,0.920732	NCBI Hits Summary
OTU1026	Eukaryota;Viridiplantae;Chlorophyta;Chlorophyceae;	Eukaryota;Archaeplastida;Chloroplastida;Chlorophyta;	Eukaryota;Chlorophyta_ph;Chlorophyceae;Chlorophyceae_unclassified;Chlorophyceae_unclassified;Chlorophyceae_unclassified	2	9.92447e-06	Chlorophyta	JQ315516,AJ781311,AB290341	0.930303,0.918182,0.918182	NCBI Hits Summary
OTU1027	Unclassified;	Unclassified;	Eukaryota;Eukaryota_unclassified;Eukaryota_unclassified;Eukaryota_unclassified;Eukaryota_unclassified;Eukaryota_unclassified	2	9.92447e-06	Eukaryota_unclassified			NCBI Hits Summary
OTU1028	Eukaryota;environmental samples;	Eukaryota;SAR;Alveolata;	Eukaryota;Eukaryota_unclassified;Eukaryota_unclassified;Eukaryota_unclassified;Eukaryota_unclassified;Eukaryota_unclassified	2	9.92447e-06	Eukaryota_unclassified	KJ759500,KJ759639,KJ763108,KJ762900,KJ762691,KJ763031,KJ762932,KJ762908,KJ763359	0.939024,0.939024,0.939024,0.939024,0.939024,0.939024,0.939024,0.939024,0.939024	NCBI Hits Summary
OTU1030	Eukaryota;	Eukaryota;SAR;Alveolata;Ciliophora;Intramacronucleata;Conthreep;Oligohymenophorea;Apostomatia;	Eukaryota;Ciliophora;Intramacronucleata;Conthreep;Oligohymenophorea;Oligohymenophorea_unclassified	2	9.92447e-06	Ciliophora	EU503535,KJ757240,EU503539	0.940252,0.940252,0.937107	NCBI Hits Summary
OTU1031	unclassified sequences;metagenomes;	Eukaryota;Amorphea;Amoebozoa;SAR;Stramenopiles;Labyrinthulomycetes;Sorodiplophrys;	Eukaryota;Eukaryota_unclassified;Eukaryota_unclassified;Eukaryota_unclassified;Eukaryota_unclassified;Eukaryota_unclassified	2	9.92447e-06	Eukaryota_unclassified	FPLS01016464,FPLS01059377	0.952239,0.907463	NCBI Hits Summary
OTU1032	Eukaryota;environmental samples;	Eukaryota;SAR;Alveolata;	Eukaryota;Dinoflagellata;Dinophyceae;Dinophyceae_unclassified;Dinophyceae_unclassified;Dinophyceae_unclassified	2	9.92447e-06	Dinoflagellata	KJ759500,KJ759639,KJ763108,KJ762900,KJ762691,KJ763031,KJ762932,KJ762908,KJ763359	0.942073,0.942073,0.942073,0.942073,0.942073,0.942073,0.942073,0.942073,0.942073	NCBI Hits Summary
OTU1033	Eukaryota;	Eukaryota;SAR;Alveolata;Dinoflagellata;Dinophyceae;Peridiniphycidae;	Eukaryota;Dinoflagellata;Dinophyceae;Peridiniphycidae_or;Thoracosphaeraceae;Thoracosphaeraceae_unclassified	2	9.92447e-06	Dinoflagellata	JN090875,AY121856,AY590483	0.945289,0.93617,0.933131	NCBI Hits Summary
OTU1034	Eukaryota;	Eukaryota;SAR;Alveolata;Dinoflagellata;Dinophyceae;Peridiniphycidae;	Eukaryota;Dinoflagellata;Dinophyceae;Peridiniphycidae_or;Thoracosphaeraceae;Thoracosphaeraceae_ge	2	9.92447e-06	Dinoflagellata	JN090875	0.966667	NCBI Hits Summary
OTU1035	Unclassified;	Unclassified;	Eukaryota;Eukaryota_unclassified;Eukaryota_unclassified;Eukaryota_unclassified;Eukaryota_unclassified;Eukaryota_unclassified	2	9.92447e-06	Eukaryota_unclassified			NCBI Hits Summary
OTU1037	Eukaryota;	Eukaryota;SAR;Alveolata;	Eukaryota;Dinoflagellata;Dinophyceae;Dinophyceae_unclassified;Dinophyceae_unclassified;Dinophyceae_unclassified	2	9.92447e-06	Dinoflagellata	GU819725,KJ757950,KJ762691,KJ763031,KJ759639,KJ762900,KJ762932,KJ763359	0.923781,0.923781,0.923781,0.920732,0.920732,0.920732,0.920732,0.920732	NCBI Hits Summary
OTU1038	Unclassified;	Unclassified;	Eukaryota;Eukaryota_unclassified;Eukaryota_unclassified;Eukaryota_unclassified;Eukaryota_unclassified;Eukaryota_unclassified	2	9.92447e-06	Eukaryota_unclassified			NCBI Hits Summary
OTU1041	Eukaryota;Fungi;Dikarya;Ascomycota;Pezizomycotina;Dothideomycetes;	Eukaryota;Amorphea;Obazoa;Opisthokonta;Nucletmycea;Fungi;Dikarya;Ascomycota;Pezizomycotina;Dothideomycetes;	Eukaryota;Ascomycota;Dothideomycetes;Venturiales;Venturiaceae;Venturia	2	9.92447e-06	Ascomycota	JEMP01000030,JEMP01000104	0.993994,0.993994	NCBI Hits Summary
OTU1044	Eukaryota;	Eukaryota;SAR;Alveolata;Dinoflagellata;Dinophyceae;Gymnodiniphycidae;Suessiaceae;Symbiodinium;	Eukaryota;Eukaryota_unclassified;Eukaryota_unclassified;Eukaryota_unclassified;Eukaryota_unclassified;Eukaryota_unclassified	2	9.92447e-06	Dinoflagellata	HQ191324,GU067954	0.920732,0.920732	NCBI Hits Summary
OTU1047	Unclassified;	Eukaryota;SAR;Stramenopiles;Bicosoecida;Bicosoeca;	Eukaryota;Eukaryota_unclassified;Eukaryota_unclassified;Eukaryota_unclassified;Eukaryota_unclassified;Eukaryota_unclassified	2	9.92447e-06	Eukaryota_unclassified	AY520444	0.915152	NCBI Hits Summary
OTU1048	Eukaryota;environmental samples;	Eukaryota;SAR;Alveolata;	Eukaryota;Dinoflagellata;Dinophyceae;Dinophyceae_unclassified;Dinophyceae_unclassified;Dinophyceae_unclassified	2	9.92447e-06	Dinoflagellata	KJ763108,KJ763359,KJ762900,KJ762871,KJ762932,KJ763365,KJ759500,KJ759639,KJ762908	0.926829,0.926829,0.926829,0.926829,0.926829,0.926829,0.926829,0.926829,0.926829	NCBI Hits Summary
OTU1050	Eukaryota;environmental samples;	Eukaryota;SAR;Alveolata;	Eukaryota;Dinoflagellata;Dinophyceae;Dinophyceae_unclassified;Dinophyceae_unclassified;Dinophyceae_unclassified	2	9.92447e-06	Dinoflagellata	KJ762691,KJ757950,KJ759639,KJ759500,KJ763108,KJ762900,KJ763031,KJ762932	0.935976,0.935976,0.932927,0.932927,0.932927,0.932927,0.932927,0.932927	NCBI Hits Summary
OTU1052	Eukaryota;	Eukaryota;SAR;Rhizaria;Cercozoa;Thecofilosea;Ebriacea;Ebria;	Eukaryota;Eukaryota_unclassified;Eukaryota_unclassified;Eukaryota_unclassified;Eukaryota_unclassified;Eukaryota_unclassified	2	9.92447e-06	Cercozoa	JN090861	0.943114	NCBI Hits Summary
OTU1053	Eukaryota;environmental samples;	Eukaryota;SAR;Alveolata;	Eukaryota;Dinoflagellata;Dinophyceae;Dinophyceae_unclassified;Dinophyceae_unclassified;Dinophyceae_unclassified	2	9.92447e-06	Dinoflagellata	KJ763108,KJ762932,KJ762908,KJ763031,KJ763359,KJ762871,KJ763365,KJ759639,KJ759500	0.932927,0.932927,0.932927,0.932927,0.932927,0.932927,0.932927,0.932927,0.932927	NCBI Hits Summary
OTU1054	Eukaryota;Viridiplantae;Chlorophyta;Trebouxiophyceae;Trebouxiophyceae incertae sedis;	Eukaryota;Archaeplastida;Chloroplastida;Chlorophyta;Trebouxiophyceae;	Eukaryota;Chlorophyta_ph;Trebouxiophyceae;Trebouxiophyceae_or;Trebouxiophyceae_fa;Trebouxiophyceae_ge	2	9.92447e-06	Chlorophyta/Trebouxiophyceae	AY197640,MVGU01000227	0.990909,0.948485	NCBI Hits Summary
OTU1057	Eukaryota;Stramenopiles;	Eukaryota;SAR;Stramenopiles;Ochrophyta;Diatomea;Bacillariophytina;Mediophyceae;Thalassiosira;	Eukaryota;Diatomea;Mediophyceae;Mediophyceae_or;Mediophyceae_fa;Mediophyceae_fa_unclassified	2	9.92447e-06	Bacillariophyceae	HM991689,DQ093369,AJ810854,DQ093366,JQ782074,AB831890,JQ782077	0.963746,0.963746,0.963746,0.960725,0.960725,0.960725,0.957704	NCBI Hits Summary
OTU1059	Eukaryota;environmental samples;	Eukaryota;SAR;Alveolata;	Eukaryota;Dinoflagellata;Dinophyceae;Dinophyceae_unclassified;Dinophyceae_unclassified;Dinophyceae_unclassified	2	9.92447e-06	Dinoflagellata	KJ758503,KJ759500,KJ762691,KJ763108,KJ762900,KJ763031,KJ762932,KJ763359	0.905488,0.902439,0.902439,0.902439,0.902439,0.902439,0.902439,0.902439	NCBI Hits Summary
OTU1060	Eukaryota;environmental samples;	Eukaryota;SAR;Alveolata;	Eukaryota;Dinoflagellata;Dinophyceae;Dinophyceae_unclassified;Dinophyceae_unclassified;Dinophyceae_unclassified	2	9.92447e-06	Dinoflagellata	KJ759500,KJ757950,KJ763359,KJ759639,KJ763108,KJ763031,KJ762932,KJ762908,KJ762900	0.929878,0.929878,0.929878,0.929878,0.929878,0.929878,0.929878,0.929878,0.929878	NCBI Hits Summary
OTU1062	Eukaryota;environmental samples;	Eukaryota;SAR;Alveolata;	Eukaryota;Dinoflagellata;Dinoflagellata_unclassified;Dinoflagellata_unclassified;Dinoflagellata_unclassified;Dinoflagellata_unclassified	2	9.92447e-06	Dinoflagellata	KJ762416,KJ762691,KJ759266,HM581708,KJ757950,KJ759639,KJ763365,KJ763359,KJ759500	0.935976,0.935976,0.935976,0.935976,0.935976,0.935976,0.935976,0.935976,0.935976	NCBI Hits Summary
OTU1064	Eukaryota;	Eukaryota;Haptophyta;Prymnesiophyceae;	Eukaryota;Prymnesiophyceae;Prymnesiophyceae_cl;Isochrysidales;Isochrysidales_fa;ESS2202	2	9.92447e-06	Haptophyta/Prymnesiophyceae	HQ446272	0.964179	NCBI Hits Summary
OTU1066	Eukaryota;environmental samples;	Eukaryota;SAR;Alveolata;	Eukaryota;Eukaryota_unclassified;Eukaryota_unclassified;Eukaryota_unclassified;Eukaryota_unclassified;Eukaryota_unclassified	2	9.92447e-06	Eukaryota_unclassified	KJ762691,KJ757950,KJ759500,KJ762321,KJ762416,KJ759639,GU819725,KJ758503	0.93125,0.93125,0.928125,0.928125,0.928125,0.928125,0.928125,0.928125	NCBI Hits Summary
OTU1067	Eukaryota;Alveolata;	Eukaryota;SAR;Alveolata;Ciliophora;Intramacronucleata;Spirotrichea;	Eukaryota;Ciliophora;Intramacronucleata;Spirotrichea;Choreotrichia;Choreotrichia_unclassified	2	9.92447e-06	Ciliophora	EU162620,KC404828,KX158727,KF951419,AF164125,KU821589,LASR02006853	0.952978,0.918495,0.918495,0.915361,0.915361,0.915361,0.915361	NCBI Hits Summary
OTU1068	Eukaryota;environmental samples;	Eukaryota;SAR;Alveolata;	Eukaryota;Dinoflagellata;Dinophyceae;Dinophyceae_unclassified;Dinophyceae_unclassified;Dinophyceae_unclassified	2	9.92447e-06	Dinoflagellata	KJ762691,KJ757950,KJ763479,KJ759469,KJ757938,KJ758000,KJ762846	0.952077,0.952077,0.948882,0.948882,0.948882,0.948882,0.945687	NCBI Hits Summary
OTU1069	Eukaryota;environmental samples;	Eukaryota;SAR;Alveolata;	Eukaryota;Dinoflagellata;Dinophyceae;Dinophyceae_unclassified;Dinophyceae_unclassified;Dinophyceae_unclassified	2	9.92447e-06	Dinoflagellata	KJ763359,KJ763108,KJ763031,KJ762932,KJ762691,KJ762908,KJ762871,KJ763365,KJ762900	0.910494,0.910494,0.910494,0.910494,0.910494,0.910494,0.910494,0.910494,0.910494	NCBI Hits Summary
OTU1072	Eukaryota;environmental samples;	Eukaryota;SAR;Rhizaria;Cercozoa;Thecofilosea;uncultured;	Eukaryota;Eukaryota_unclassified;Eukaryota_unclassified;Eukaryota_unclassified;Eukaryota_unclassified;Eukaryota_unclassified	2	9.92447e-06	Cercozoa			NCBI Hits Summary
OTU1073	Eukaryota;environmental samples;	Eukaryota;SAR;Alveolata;	Eukaryota;Eukaryota_unclassified;Eukaryota_unclassified;Eukaryota_unclassified;Eukaryota_unclassified;Eukaryota_unclassified	2	9.92447e-06	Eukaryota_unclassified	KJ759500,KJ759639,KJ763108,KJ762900,KJ762691,KJ763031,KJ762932,KJ762908,KJ763359	0.942073,0.942073,0.942073,0.942073,0.942073,0.942073,0.942073,0.942073,0.942073	NCBI Hits Summary
OTU1077	Eukaryota;Fungi;Dikarya;Basidiomycota;Agaricomycotina;Agaricomycetes;	Eukaryota;Amorphea;Obazoa;Opisthokonta;Nucletmycea;Fungi;Dikarya;Basidiomycota;Agaricomycotina;Agaricomycetes;	Eukaryota;Basidiomycota;Agaricomycetes;Agaricomycetes_unclassified;Agaricomycetes_unclassified;Agaricomycetes_unclassified	2	9.92447e-06	Basidiomycota	AY654890,GEHF01000047,KF291081,AY293122,KU058584,KF381539,DQ873658	0.987988,0.978979,0.978979,0.975976,0.975976,0.975976,0.975976	NCBI Hits Summary
OTU1078	Eukaryota;environmental samples;	Eukaryota;SAR;Alveolata;	Eukaryota;Dinoflagellata;Dinophyceae;Dinophyceae_unclassified;Dinophyceae_unclassified;Dinophyceae_unclassified	2	9.92447e-06	Dinoflagellata	KJ762571,KJ757926,KJ762196,KJ757673,KJ762277,KJ764212,KJ759327,KJ757867	0.927273,0.927273,0.927273,0.924242,0.924242,0.924242,0.924242,0.924242	NCBI Hits Summary
OTU1080	Unclassified;	Unclassified;	Eukaryota;Eukaryota_unclassified;Eukaryota_unclassified;Eukaryota_unclassified;Eukaryota_unclassified;Eukaryota_unclassified	2	9.92447e-06	Eukaryota_unclassified			NCBI Hits Summary
OTU1081	Eukaryota;	Eukaryota;Cryptophyceae;Cryptomonadales;	Eukaryota;Cryptophyceae_ph;Cryptophyceae_cl;Cryptomonadales;Cryptomonadales_fa;Cryptomonadales_fa_unclassified	2	9.92447e-06	Cryptophyceae	JQ420121,JF791030,KF130577	0.945289,0.933131,0.933131	NCBI Hits Summary
OTU1082	Eukaryota;	Eukaryota;SAR;Alveolata;	Eukaryota;Dinoflagellata;Dinophyceae;Dinophyceae_unclassified;Dinophyceae_unclassified;Dinophyceae_unclassified	2	9.92447e-06	Dinoflagellata	EU418970,EF657885,KJ757273,EF492511,JF791024,KJ764212,KJ761221	0.936364,0.933333,0.933333,0.933333,0.930303,0.930303,0.930303	NCBI Hits Summary
OTU1084	Eukaryota;Stramenopiles;Oomycetes;	Eukaryota;SAR;Stramenopiles;Peronosporomycetes;	Eukaryota;Peronosporomycetes;Peronosporomycetes_cl;Peronosporomycetes_or;Peronosporomycetes_fa;Peronosporomycetes_fa_unclassified	2	9.92447e-06	Peronosporomycetes	KT257367,AY598650,AY598717,EU199114,HQ643518,AY598654,KC741469	0.984985,0.981982,0.978979,0.978979,0.978979,0.978979,0.978979	NCBI Hits Summary
OTU1085	Unclassified;	Unclassified;	Eukaryota;Eukaryota_unclassified;Eukaryota_unclassified;Eukaryota_unclassified;Eukaryota_unclassified;Eukaryota_unclassified	2	9.92447e-06	Eukaryota_unclassified			NCBI Hits Summary
OTU1086	Eukaryota;	Eukaryota;SAR;Alveolata;Dinoflagellata;Dinophyceae;	Eukaryota;Dinoflagellata;Dinophyceae;Peridiniphycidae_or;Thoracosphaeraceae;Thoracosphaeraceae_ge	2	9.92447e-06	Dinoflagellata	JN090875,DQ103862,AY251288,KJ758050,KJ757867,AY590483,KJ758066	0.963636,0.954545,0.954545,0.951515,0.951515,0.951515,0.951515	NCBI Hits Summary
OTU1087	Eukaryota;environmental samples;	Eukaryota;SAR;Alveolata;	Eukaryota;Dinoflagellata;Dinophyceae;Dinophyceae_unclassified;Dinophyceae_unclassified;Dinophyceae_unclassified	2	9.92447e-06	Dinoflagellata	KJ762691,KJ763359,KJ763031,KJ759639,KJ757950,KJ762932,KJ762871,KJ763365,KJ763108	0.942073,0.942073,0.942073,0.942073,0.942073,0.942073,0.942073,0.942073,0.942073	NCBI Hits Summary
OTU1088	unclassified sequences;metagenomes;	Eukaryota;SAR;Stramenopiles;Labyrinthulomycetes;Amphitraemidae;	Eukaryota;Eukaryota_unclassified;Eukaryota_unclassified;Eukaryota_unclassified;Eukaryota_unclassified;Eukaryota_unclassified	2	9.92447e-06	Eukaryota_unclassified			NCBI Hits Summary
OTU1089	Eukaryota;environmental samples;	Eukaryota;SAR;Alveolata;	Eukaryota;Dinoflagellata;Dinophyceae;Dinophyceae_unclassified;Dinophyceae_unclassified;Dinophyceae_unclassified	2	4.96224e-06	Dinoflagellata	KJ758318,KJ762844,KJ758217,KJ763588,KJ757872,DQ103862,KJ758345,AY251288	0.951515,0.951515,0.951515,0.948485,0.948485,0.948485,0.948485,0.948485	NCBI Hits Summary
OTU1090	Eukaryota;	Eukaryota;SAR;Alveolata;Ciliophora;Intramacronucleata;Spirotrichea;Hypotrichia;	Eukaryota;Ciliophora;Intramacronucleata;Spirotrichea;Hypotrichia;Halteria	2	9.92447e-06	Ciliophora	DQ244036,DQ244039,AF508769,AF164125,AB695452,LN870033,JX139117	0.939683,0.939683,0.926984,0.926984,0.926984,0.926984,0.926984	NCBI Hits Summary
OTU1091	Eukaryota;environmental samples;	Eukaryota;SAR;Alveolata;Dinoflagellata;	Eukaryota;Dinoflagellata;Dinophyceae;Dinophyceae_unclassified;Dinophyceae_unclassified;Dinophyceae_unclassified	2	4.96224e-06	Dinoflagellata	KJ763588,KJ762844,KJ758318,KJ758217,KJ757751,KJ759088,KJ758039	0.960606,0.960606,0.960606,0.960606,0.957576,0.957576,0.957576	NCBI Hits Summary
OTU1092	Eukaryota;environmental samples;	Eukaryota;SAR;Alveolata;	Eukaryota;Eukaryota_unclassified;Eukaryota_unclassified;Eukaryota_unclassified;Eukaryota_unclassified;Eukaryota_unclassified	2	1.48867e-05	Eukaryota_unclassified	KJ757950,KJ762691,KJ763031,KJ759639,GU819725,KJ762900,KJ762932,KJ763108	0.961039,0.961039,0.957792,0.957792,0.957792,0.957792,0.957792,0.957792	NCBI Hits Summary
OTU1093	Eukaryota;environmental samples;	Eukaryota;SAR;Alveolata;Dinoflagellata;	Eukaryota;Dinoflagellata;Dinophyceae;Dinophyceae_unclassified;Dinophyceae_unclassified;Dinophyceae_unclassified	2	4.96224e-06	Dinoflagellata	KJ761545,KJ759088,KF130216,KJ758345,KJ758039,KJ758256,KJ762844,KJ757662	0.948485,0.948485,0.948485,0.948485,0.948485,0.945455,0.945455,0.945455	NCBI Hits Summary
OTU1096	Eukaryota;environmental samples;	Eukaryota;SAR;	Eukaryota;Eukaryota_unclassified;Eukaryota_unclassified;Eukaryota_unclassified;Eukaryota_unclassified;Eukaryota_unclassified	2	9.92447e-06	Eukaryota_unclassified	KC771166	0.930931	NCBI Hits Summary
OTU1099	Unclassified;	Eukaryota;SAR;Stramenopiles;Peronosporomycetes;	Eukaryota;Peronosporomycetes;Peronosporomycetes_cl;Peronosporomycetes_or;Peronosporomycetes_fa;Peronosporomycetes_fa_unclassified	2	1.48867e-05	Peronosporomycetes	FPLS01061947	0.981982	NCBI Hits Summary
OTU1100	Eukaryota;	Eukaryota;SAR;Alveolata;Dinoflagellata;Dinophyceae;Gymnodiniphycidae;	Eukaryota;Dinoflagellata;Dinophyceae;Gymnodiniphycidae;Gymnodiniphycidae_unclassified;Gymnodiniphycidae_unclassified	2	4.96224e-06	Dinoflagellata	GU067954,LC068836	0.951219,0.939024	NCBI Hits Summary
OTU1104	Eukaryota;Rhizaria;Cercozoa;environmental samples;	Eukaryota;SAR;Rhizaria;Cercozoa;Novel Clade 10;	Eukaryota;Eukaryota_unclassified;Eukaryota_unclassified;Eukaryota_unclassified;Eukaryota_unclassified;Eukaryota_unclassified	2	9.92447e-06	Cercozoa	GU067921	0.914373	NCBI Hits Summary
OTU1105	Eukaryota;environmental samples;	Eukaryota;SAR;Alveolata;	Eukaryota;Dinoflagellata;Dinophyceae;Dinophyceae_unclassified;Dinophyceae_unclassified;Dinophyceae_unclassified	2	1.48867e-05	Dinoflagellata	KJ762691,KJ762416,KJ763359,KJ762321,KJ759266,KJ759500,KJ763108,KJ762900,KJ757950	0.965409,0.965409,0.965409,0.965409,0.965409,0.965409,0.965409,0.965409,0.965409	NCBI Hits Summary
OTU1106	Eukaryota;Alveolata;Ciliophora;Intramacronucleata;Oligohymenophorea;Hymenostomatida;	Eukaryota;SAR;Alveolata;Ciliophora;Intramacronucleata;Conthreep;Oligohymenophorea;Hymenostomatia;	Eukaryota;Ciliophora;Intramacronucleata;Conthreep;Oligohymenophorea;Hymenostomatia_ge	2	4.96224e-06	Ciliophora	AEDN01002274	0.958599	NCBI Hits Summary
OTU1109	Eukaryota;Alveolata;Apicomplexa;Conoidasida;Gregarinasina;	Eukaryota;SAR;Alveolata;Apicomplexa;Conoidasida;Gregarinasina;	Eukaryota;Apicomplexa;Conoidasida;Gregarinasina;Neogregarinorida;Neogregarinorida_ge	2	4.96224e-06	Conoidasida	EF666482	0.925926	NCBI Hits Summary
OTU1110	Eukaryota;environmental samples;	Eukaryota;SAR;Alveolata;	Eukaryota;Dinoflagellata;Dinophyceae;Dinophyceae_unclassified;Dinophyceae_unclassified;Dinophyceae_unclassified	2	9.92447e-06	Dinoflagellata	KJ758503,KJ759500,KJ757950,KJ759639,KJ762900,KJ763031,KJ762932,KJ763108	0.923781,0.920732,0.920732,0.920732,0.920732,0.920732,0.920732,0.920732	NCBI Hits Summary
OTU1111	Eukaryota;Amoebozoa;	Eukaryota;Amorphea;Amoebozoa;Discosea;Flabellinia;Vannellida;Vannella;	Eukaryota;Eukaryota_unclassified;Eukaryota_unclassified;Eukaryota_unclassified;Eukaryota_unclassified;Eukaryota_unclassified	2	9.92447e-06	Eukaryota_unclassified	JQ271744	0.934911	NCBI Hits Summary
OTU1112	Unclassified;	Eukaryota;SAR;Rhizaria;Cercozoa;	Eukaryota;Cercozoa;Cercozoa_unclassified;Cercozoa_unclassified;Cercozoa_unclassified;Cercozoa_unclassified	2	9.92447e-06	Cercozoa	DQ211593	0.960961	NCBI Hits Summary
OTU1114	Eukaryota;Stramenopiles;Bacillariophyta;	Eukaryota;SAR;Stramenopiles;Ochrophyta;Diatomea;	Eukaryota;Diatomea;Diatomea_unclassified;Diatomea_unclassified;Diatomea_unclassified;Diatomea_unclassified	2	4.96224e-06	Bacillariophyceae	AY633758,EF465465,JX401239	0.963415,0.960366,0.957317	NCBI Hits Summary
OTU1115	Eukaryota;	Eukaryota;Amorphea;Obazoa;Opisthokonta;Nucletmycea;Fungi;Dikarya;Ascomycota;Pezizomycotina;Dothideomycetes;Pleosporales;	Eukaryota;Ascomycota;Dothideomycetes;Pleosporales;Pleosporales_unclassified;Pleosporales_unclassified	2	4.96224e-06	Ascomycota	KC841054,KC841028	0.945946,0.945946	NCBI Hits Summary
OTU1116	Eukaryota;environmental samples;	Eukaryota;SAR;Rhizaria;Cercozoa;Phytomyxea;uncultured;	Eukaryota;Cercozoa;Phytomyxea;Phytomyxea_or;Phytomyxea_fa;Plasmodiophora	2	9.92447e-06	Cercozoa			NCBI Hits Summary
OTU1117	Unclassified;	Unclassified;	Eukaryota;Eukaryota_unclassified;Eukaryota_unclassified;Eukaryota_unclassified;Eukaryota_unclassified;Eukaryota_unclassified	2	9.92447e-06	Eukaryota_unclassified			NCBI Hits Summary
OTU1118	Eukaryota;Fungi;Dikarya;Ascomycota;Pezizomycotina;Leotiomycetes;Helotiales;	Eukaryota;Amorphea;Obazoa;Opisthokonta;Nucletmycea;Fungi;Dikarya;Ascomycota;Pezizomycotina;Leotiomycetes;Helotiales;	Eukaryota;Ascomycota;Leotiomycetes;Helotiales;Chaetomellaceae;Pilidium	2	4.96224e-06	Ascomycota	AY342012,AY342014,AY487081,AY487099,AY487093,AY487087,AY487084,AY342009	1,1,1,1,1,1,1,0.993994	NCBI Hits Summary
OTU1119	Unclassified;	Unclassified;	Eukaryota;Diatomea;Bacillariophyceae;Bacillariophyceae_or;Bacillariophyceae_fa;Gomphonema	2	4.96224e-06	Bacillariophyceae			NCBI Hits Summary
OTU1120	Unclassified;	Unclassified;	Eukaryota;Eukaryota_unclassified;Eukaryota_unclassified;Eukaryota_unclassified;Eukaryota_unclassified;Eukaryota_unclassified	2	9.92447e-06	Eukaryota_unclassified			NCBI Hits Summary
OTU1121	Unclassified;	Unclassified;	Eukaryota;Eukaryota_unclassified;Eukaryota_unclassified;Eukaryota_unclassified;Eukaryota_unclassified;Eukaryota_unclassified	2	9.92447e-06	Eukaryota_unclassified			NCBI Hits Summary
OTU1122	Unclassified;	Unclassified;	Eukaryota;Eukaryota_unclassified;Eukaryota_unclassified;Eukaryota_unclassified;Eukaryota_unclassified;Eukaryota_unclassified	2	4.96224e-06	Eukaryota_unclassified			NCBI Hits Summary
OTU1125	Unclassified;	Unclassified;	Eukaryota;Eukaryota_unclassified;Eukaryota_unclassified;Eukaryota_unclassified;Eukaryota_unclassified;Eukaryota_unclassified	2	4.96224e-06	Eukaryota_unclassified			NCBI Hits Summary
OTU1127	Eukaryota;	Eukaryota;SAR;Rhizaria;Cercozoa;Imbricatea;Silicofilosea;Euglyphida;Paulinellidae;Paulinella;	Eukaryota;Eukaryota_unclassified;Eukaryota_unclassified;Eukaryota_unclassified;Eukaryota_unclassified;Eukaryota_unclassified	2	4.96224e-06	Cercozoa	AB695524	0.952096	NCBI Hits Summary
OTU1128	Eukaryota;	Eukaryota;Amorphea;Obazoa;Opisthokonta;Nucletmycea;Fungi;Chytridiomycota;Incertae Sedis;Chytridiomycetes;	Eukaryota;Chytridiomycota;Chytridiomycetes;Chytridiomycetes_unclassified;Chytridiomycetes_unclassified;Chytridiomycetes_unclassified	2	4.96224e-06	Chytridiomycota	DQ536488,FPLS01000762	0.981982,0.951952	NCBI Hits Summary
OTU1129	Eukaryota;Fungi;Dikarya;Ascomycota;Pezizomycotina;Leotiomycetes;	Eukaryota;Amorphea;Obazoa;Opisthokonta;Nucletmycea;Fungi;Dikarya;Ascomycota;Pezizomycotina;Leotiomycetes;Helotiales;	Eukaryota;Ascomycota;Leotiomycetes;Helotiales;Helotiales_unclassified;Helotiales_unclassified	2	4.96224e-06	Ascomycota	AY524844,AY524846,AY762619,AY838785	0.978916,0.96988,0.963855,0.963855	NCBI Hits Summary
OTU1130	Eukaryota;	Eukaryota;SAR;Rhizaria;Cercozoa;Imbricatea;Silicofilosea;Thaumatomonadida;Peregriniidae;	Eukaryota;Cercozoa;Cercozoa_unclassified;Cercozoa_unclassified;Cercozoa_unclassified;Cercozoa_unclassified	2	4.96224e-06	Cercozoa	EF023480,AB714270	0.923781,0.914634	NCBI Hits Summary
OTU1131	Unclassified;	Eukaryota;Amorphea;Amoebozoa;SAR;Stramenopiles;Labyrinthulomycetes;Sorodiplophrys;	Eukaryota;Eukaryota_unclassified;Eukaryota_unclassified;Eukaryota_unclassified;Eukaryota_unclassified;Eukaryota_unclassified	2	4.96224e-06	Eukaryota_unclassified	FPLS01016464,DQ104600	0.928358,0.901493	NCBI Hits Summary
OTU1132	Unclassified;	Unclassified;	Eukaryota;Eukaryota_unclassified;Eukaryota_unclassified;Eukaryota_unclassified;Eukaryota_unclassified;Eukaryota_unclassified	2	4.96224e-06	Eukaryota_unclassified			NCBI Hits Summary
OTU1133	Eukaryota;Viridiplantae;Chlorophyta;	Eukaryota;Archaeplastida;Chloroplastida;Chlorophyta;Chlorophyceae;	Eukaryota;Chlorophyta_ph;Chlorophyceae;Chlorophyceae_or;Chlorophyceae_fa;Chlorophyceae_ge	2	4.96224e-06	Chlorophyta	KM020017	0.969512	NCBI Hits Summary
OTU1135	Eukaryota;	Eukaryota;Amorphea;Obazoa;Opisthokonta;Holozoa;Choanozoa;Choanoflagellata;Choanoflagellida;Craspedida;Codosigidae;Freshwater Choanoflagellates 1;	Eukaryota;Holozoa_ph;Choanoflagellida;Craspedida_or;Craspedida_or_unclassified;Craspedida_or_unclassified	2	9.92447e-06	Holozoa	DQ104591,DQ104581	0.997006,0.997006	NCBI Hits Summary
OTU1137	Eukaryota;Viridiplantae;Chlorophyta;Chlorophyceae;Chlamydomonadales;	Eukaryota;Archaeplastida;Chloroplastida;Chlorophyta;Chlorophyceae;Chlamydomonadales;	Eukaryota;Chlorophyta_ph;Chlorophyceae;Chlorophyceae_or;Chlorophyceae_fa;Chlorophyceae_ge	2	4.96224e-06	Chlorophyta	FR854385,KM020018,AY731083,FR854388,KM020017,FR854390,AB058371	0.957317,0.957317,0.957317,0.954268,0.954268,0.954268,0.951219	NCBI Hits Summary
OTU1138	Eukaryota;Stramenopiles;Bacillariophyta;Bacillariophyceae;Bacillariophycidae;Naviculales;	Eukaryota;SAR;Stramenopiles;Ochrophyta;Diatomea;Bacillariophytina;Bacillariophyceae;	Eukaryota;Diatomea;Diatomea_unclassified;Diatomea_unclassified;Diatomea_unclassified;Diatomea_unclassified	2	9.92447e-06	Bacillariophyceae	AM501989,AM502037,AJ243064,KJ961680	0.957576,0.957576,0.954545,0.951515	NCBI Hits Summary
OTU1139	Eukaryota;Fungi;Dikarya;Ascomycota;Pezizomycotina;	Eukaryota;Amorphea;Obazoa;Opisthokonta;Nucletmycea;Fungi;Dikarya;Ascomycota;Pezizomycotina;	Eukaryota;Eukaryota_unclassified;Eukaryota_unclassified;Eukaryota_unclassified;Eukaryota_unclassified;Eukaryota_unclassified	2	4.96224e-06	Ascomycota	AF006314,AF006316,MG257770,DQ646532,AF104346,AJ421685,FPLS01027581,MG262488	0.908537,0.908537,0.905488,0.905488,0.905488,0.905488,0.905488,0.905488	NCBI Hits Summary
OTU1140	Eukaryota;Fungi;Fungi incertae sedis;Chytridiomycota;	Eukaryota;Amorphea;Obazoa;Opisthokonta;Nucletmycea;Fungi;Chytridiomycota;Incertae Sedis;Chytridiomycetes;Chytridiales;	Eukaryota;Chytridiomycota;Chytridiomycetes;Chytridiales;Chytridiales_unclassified;Chytridiales_unclassified	2	4.96224e-06	Chytridiomycota	GQ995248	0.924242	NCBI Hits Summary
OTU1141	Eukaryota;environmental samples;	Eukaryota;SAR;Rhizaria;Cercozoa;Phytomyxea;uncultured;	Eukaryota;Cercozoa;Phytomyxea;Phytomyxea_or;Phytomyxea_fa;Plasmodiophora	2	1.48867e-05	Cercozoa			NCBI Hits Summary
OTU1142	Unclassified;	Unclassified;	Eukaryota;Eukaryota_unclassified;Eukaryota_unclassified;Eukaryota_unclassified;Eukaryota_unclassified;Eukaryota_unclassified	2	4.96224e-06	Eukaryota_unclassified			NCBI Hits Summary
OTU1143	Eukaryota;Alveolata;Ciliophora;Intramacronucleata;Oligohymenophorea;Peniculida;Lembadionidae;Lembadion;	Eukaryota;SAR;Alveolata;Ciliophora;Intramacronucleata;Conthreep;Oligohymenophorea;Peniculia;Lembadion;	Eukaryota;Ciliophora;Intramacronucleata;Conthreep;Oligohymenophorea;Peniculia_ge	2	9.92447e-06	Ciliophora			NCBI Hits Summary
OTU1144	Eukaryota;Stramenopiles;Bacillariophyta;Fragilariophyceae;Fragilariophycidae;	Eukaryota;SAR;Stramenopiles;Ochrophyta;Diatomea;	Eukaryota;Diatomea;Bacillariophyceae;Bacillariophyceae_or;Bacillariophyceae_fa;Diatoma	2	4.96224e-06	Bacillariophyceae	AM497725,EF465465,EF465466	0.969788,0.969788,0.966767	NCBI Hits Summary
OTU1145	Eukaryota;Stramenopiles;Bacillariophyta;Bacillariophyceae;Bacillariophycidae;Cymbellales;Gomphonemataceae;Gomphonema;	Eukaryota;SAR;Stramenopiles;Ochrophyta;Diatomea;Bacillariophytina;Bacillariophyceae;Gomphonema;	Eukaryota;Diatomea;Bacillariophyceae;Bacillariophyceae_or;Bacillariophyceae_fa;Gomphonema	2	4.96224e-06	Bacillariophyceae	AM502005	0.947853	NCBI Hits Summary
OTU1146	Eukaryota;Stramenopiles;PX clade;Xanthophyceae;Vaucheriales;Vaucheriaceae;Vaucheria;	Eukaryota;SAR;Stramenopiles;Ochrophyta;Xanthophyceae;Vaucheriales;Vaucheria;	Eukaryota;Ochrophyta_ph;Ochrophyta_ph_unclassified;Ochrophyta_ph_unclassified;Ochrophyta_ph_unclassified;Ochrophyta_ph_unclassified	2	4.96224e-06	Xanthophyceae			NCBI Hits Summary
OTU1147	Unclassified;	Eukaryota;SAR;Rhizaria;Cercozoa;	Eukaryota;Cercozoa;Cercozoa_unclassified;Cercozoa_unclassified;Cercozoa_unclassified;Cercozoa_unclassified	2	4.96224e-06	Cercozoa	DQ211593	0.972973	NCBI Hits Summary
OTU1148	Unclassified;	Eukaryota;SAR;Alveolata;Protalveolata;Perkinsidae;	Eukaryota;Protalveolata;Perkinsidae;A31;A31_fa;A31_ge	2	4.96224e-06	Perkinsidae	EU162629	0.921136	NCBI Hits Summary
OTU1149	Unclassified;	Eukaryota;Amorphea;Obazoa;Opisthokonta;Nucletmycea;Fungi;Dikarya;Ascomycota;Pezizomycotina;	Eukaryota;Ascomycota;Leotiomycetes;Helotiales;Helotiales_unclassified;Helotiales_unclassified	2	4.96224e-06	Ascomycota	FPLS01040069,FPLS01059251,FPLS01007197,FPLS01033887,FPLS01019657,AY706320,AY838785	0.972892,0.972892,0.972892,0.972892,0.972892,0.960843,0.960843	NCBI Hits Summary
OTU1150	Eukaryota;	Eukaryota;Amorphea;Obazoa;Opisthokonta;Nucletmycea;Fungi;Chytridiomycota;Incertae Sedis;Chytridiomycetes;	Eukaryota;Chytridiomycota;Chytridiomycota_unclassified;Chytridiomycota_unclassified;Chytridiomycota_unclassified;Chytridiomycota_unclassified	2	9.92447e-06	Chytridiomycota	HQ219419,HQ191340,GQ995332,AF164253,GQ995334,EF432819	0.933735,0.924699,0.924699,0.921687,0.921687,0.921687	NCBI Hits Summary
OTU1151	Eukaryota;	Eukaryota;SAR;Rhizaria;Cercozoa;Thecofilosea;	Eukaryota;Cercozoa;Cercozoa_unclassified;Cercozoa_unclassified;Cercozoa_unclassified;Cercozoa_unclassified	2	4.96224e-06	Cercozoa	DQ303924	0.96988	NCBI Hits Summary
OTU1152	Unclassified;	Unclassified;	Eukaryota;Eukaryota_unclassified;Eukaryota_unclassified;Eukaryota_unclassified;Eukaryota_unclassified;Eukaryota_unclassified	2	9.92447e-06	Eukaryota_unclassified			NCBI Hits Summary
OTU1153	Eukaryota;Viridiplantae;Chlorophyta;Chlorophyceae;Chlamydomonadales;	Eukaryota;Archaeplastida;Chloroplastida;Chlorophyta;Chlorophyceae;	Eukaryota;Chlorophyta_ph;Chlorophyceae;Chlorophyceae_or;Chlorophyceae_fa;Chlorophyceae_ge	2	4.96224e-06	Chlorophyta	AJ410453,AY731083,EF024149,MH703738,FR854385,AB183637,JN090871	0.945122,0.939024,0.939024,0.939024,0.939024,0.935976,0.935976	NCBI Hits Summary
OTU1154	Eukaryota;	Eukaryota;SAR;Stramenopiles;Ochrophyta;Diatomea;Bacillariophytina;Bacillariophyceae;	Eukaryota;Diatomea;Bacillariophyceae;Bacillariophyceae_or;Bacillariophyceae_fa;Bacillariophyceae_fa_unclassified	2	9.92447e-06	Bacillariophyceae	KC771191,KC771177,KC771164,AJ867279,KC771173,KC771176,AY485457,KC771171	0.957447,0.957447,0.957447,0.957447,0.957447,0.954407,0.954407,0.954407	NCBI Hits Summary
OTU1155	Unclassified;	Eukaryota;Amorphea;Amoebozoa;Discosea;Flabellinia;Vannellida;	Eukaryota;Eukaryota_unclassified;Eukaryota_unclassified;Eukaryota_unclassified;Eukaryota_unclassified;Eukaryota_unclassified	2	9.92447e-06	Eukaryota_unclassified	JQ271744	0.908012	NCBI Hits Summary
OTU1156	Eukaryota;	Eukaryota;Discoba;Discicristata;Euglenozoa;Euglenida;Heteronematina;Petalomonas;	Eukaryota;Eukaryota_unclassified;Eukaryota_unclassified;Eukaryota_unclassified;Eukaryota_unclassified;Eukaryota_unclassified	2	9.92447e-06	Eukaryota_unclassified	EF100248	0.925816	NCBI Hits Summary
OTU1157	Eukaryota;Stramenopiles;Bacillariophyta;Bacillariophyceae;Bacillariophycidae;Cymbellales;	Eukaryota;SAR;Stramenopiles;Ochrophyta;Diatomea;Bacillariophytina;Bacillariophyceae;	Eukaryota;Diatomea;Bacillariophyceae;Bacillariophyceae_or;Bacillariophyceae_fa;Bacillariophyceae_fa_unclassified	2	9.92447e-06	Bacillariophyceae	AM501964,AM502004,KF417658	0.957187,0.957187,0.95107	NCBI Hits Summary
OTU1161	Unclassified;	Unclassified;	Eukaryota;Eukaryota_unclassified;Eukaryota_unclassified;Eukaryota_unclassified;Eukaryota_unclassified;Eukaryota_unclassified	2	4.96224e-06	Eukaryota_unclassified			NCBI Hits Summary
OTU1162	Eukaryota;	Eukaryota;Amorphea;Obazoa;Opisthokonta;Nucletmycea;Fungi;Chytridiomycota;Incertae Sedis;Chytridiomycetes;Lobulomycetales;Lobulomycetaceae;	Eukaryota;Chytridiomycota;Chytridiomycetes;Lobulomycetales;Lobulomycetaceae;uncultured	2	9.92447e-06	Chytridiomycota	GQ995409	0.996997	NCBI Hits Summary
OTU1163	Unclassified;	Unclassified;	Eukaryota;Euglenozoa;Euglenozoa_unclassified;Euglenozoa_unclassified;Euglenozoa_unclassified;Euglenozoa_unclassified	2	9.92447e-06	Euglenozoa_unclassified			NCBI Hits Summary
OTU1164	Eukaryota;Fungi;Fungi incertae sedis;Chytridiomycota;	Eukaryota;Amorphea;Obazoa;Opisthokonta;Nucletmycea;Fungi;Chytridiomycota;Incertae Sedis;Chytridiomycetes;Rhizophydiales;	Eukaryota;Chytridiomycota;Chytridiomycetes;Rhizophydiales;Rhizophydiales_unclassified;Rhizophydiales_unclassified	2	9.92447e-06	Chytridiomycota	KF160860	0.942943	NCBI Hits Summary
OTU1166	Unclassified;	Unclassified;	Eukaryota;Eukaryota_unclassified;Eukaryota_unclassified;Eukaryota_unclassified;Eukaryota_unclassified;Eukaryota_unclassified	2	4.96224e-06	Eukaryota_unclassified			NCBI Hits Summary
OTU1167	Unclassified;	Unclassified;	Eukaryota;Eukaryota_unclassified;Eukaryota_unclassified;Eukaryota_unclassified;Eukaryota_unclassified;Eukaryota_unclassified	2	4.96224e-06	Eukaryota_unclassified			NCBI Hits Summary
OTU1168	Eukaryota;Euglenozoa;Diplonemida;	Eukaryota;Discoba;Discicristata;Euglenozoa;Diplonemea;	Eukaryota;Eukaryota_unclassified;Eukaryota_unclassified;Eukaryota_unclassified;Eukaryota_unclassified;Eukaryota_unclassified	2	4.96224e-06	Eukaryota_unclassified	AY425012,MF422192,AY425009,MF422190,MF422194	0.914956,0.912023,0.912023,0.909091,0.909091	NCBI Hits Summary
OTU1171	Unclassified;	Eukaryota;SAR;Rhizaria;Cercozoa;Thecofilosea;	Eukaryota;Cercozoa;Thecofilosea;Cryomonadida;Rhizaspididae;Rhogostoma	2	4.96224e-06	Cercozoa	EF024274,HQ121430,FPLS01035606	0.958199,0.942122,0.942122	NCBI Hits Summary
OTU1172	Unclassified;	Unclassified;	Eukaryota;Eukaryota_unclassified;Eukaryota_unclassified;Eukaryota_unclassified;Eukaryota_unclassified;Eukaryota_unclassified	2	9.92447e-06	Eukaryota_unclassified			NCBI Hits Summary
OTU1173	Unclassified;	Eukaryota;SAR;Alveolata;Protalveolata;Perkinsidae;A31;	Eukaryota;Protalveolata;Perkinsidae;A31;A31_fa;A31_ge	2	4.96224e-06	Perkinsidae	EU162629,FPLS01058904	0.941176,0.913313	NCBI Hits Summary
OTU1174	Eukaryota;	Eukaryota;SAR;Rhizaria;Cercozoa;Imbricatea;Silicofilosea;Euglyphida;	Eukaryota;Eukaryota_unclassified;Eukaryota_unclassified;Eukaryota_unclassified;Eukaryota_unclassified;Eukaryota_unclassified	2	4.96224e-06	Cercozoa	AJ418788,CXWJ01004159,EF456753,EF025021	0.960961,0.960961,0.918919,0.918919	NCBI Hits Summary
OTU1175	Eukaryota;	Eukaryota;SAR;Stramenopiles;Ochrophyta;Diatomea;Bacillariophytina;Bacillariophyceae;	Eukaryota;Diatomea;Bacillariophyceae;Bacillariophyceae_or;Bacillariophyceae_fa;Bacillariophyceae_fa_unclassified	2	9.92447e-06	Bacillariophyceae	KJ961655	0.97546	NCBI Hits Summary
OTU1176	Unclassified;	Unclassified;	Eukaryota;Eukaryota_unclassified;Eukaryota_unclassified;Eukaryota_unclassified;Eukaryota_unclassified;Eukaryota_unclassified	2	4.96224e-06	Eukaryota_unclassified			NCBI Hits Summary
OTU1177	Eukaryota;Viridiplantae;Chlorophyta;Chlorophyceae;Chlamydomonadales;Chlamydomonadaceae;	Eukaryota;Archaeplastida;Chloroplastida;Chlorophyta;Chlorophyceae;Chlamydomonadales;	Eukaryota;Chlorophyta_ph;Chlorophyceae;Chlorophyceae_or;Chlorophyceae_fa;Chlorophyceae_ge	2	4.96224e-06	Chlorophyta	FR865563,FJ946901,AJ410463,FR865546,JQ315506,MH703735	0.984756,0.984756,0.981707,0.981707,0.97561,0.97561	NCBI Hits Summary
OTU1179	Unclassified;	Eukaryota;SAR;Alveolata;Ciliophora;Intramacronucleata;Spirotrichea;Euplotia;Aspidisca;	Eukaryota;Ciliophora;Intramacronucleata;Spirotrichea;Euplotia;Aspidisca	2	4.96224e-06	Ciliophora	KY355516	0.942122	NCBI Hits Summary
OTU1180	Unclassified;	Eukaryota;SAR;Rhizaria;Cercozoa;Thecofilosea;	Eukaryota;Cercozoa;Thecofilosea;Cryomonadida;Rhizaspididae;Rhogostoma	2	4.96224e-06	Cercozoa	EF024274,HQ121430	0.970779,0.961039	NCBI Hits Summary
OTU1182	Eukaryota;	Eukaryota;Amorphea;Obazoa;Opisthokonta;Nucletmycea;Fungi;Chytridiomycota;Incertae Sedis;Chytridiomycetes;	Eukaryota;Chytridiomycota;Chytridiomycetes;Chytridiomycetes_unclassified;Chytridiomycetes_unclassified;Chytridiomycetes_unclassified	2	4.96224e-06	Chytridiomycota	GU825624	0.954955	NCBI Hits Summary
OTU1183	Eukaryota;Alveolata;Ciliophora;	Eukaryota;SAR;Alveolata;Ciliophora;Intramacronucleata;Litostomatea;Haptoria;	Eukaryota;Ciliophora;Intramacronucleata;Litostomatea;Haptoria;Haptoria_unclassified	2	4.96224e-06	Ciliophora	AF029764,HM581673	0.976667,0.97	NCBI Hits Summary
OTU1184	unclassified sequences;metagenomes;	Eukaryota;Amorphea;Amoebozoa;SAR;Stramenopiles;Labyrinthulomycetes;Sorodiplophrys;	Eukaryota;Eukaryota_unclassified;Eukaryota_unclassified;Eukaryota_unclassified;Eukaryota_unclassified;Eukaryota_unclassified	2	4.96224e-06	Eukaryota_unclassified			NCBI Hits Summary
OTU1185	Unclassified;	Unclassified;	Eukaryota;Eukaryota_unclassified;Eukaryota_unclassified;Eukaryota_unclassified;Eukaryota_unclassified;Eukaryota_unclassified	2	4.96224e-06	Eukaryota_unclassified			NCBI Hits Summary
OTU1186	Unclassified;	Unclassified;	Eukaryota;Eukaryota_unclassified;Eukaryota_unclassified;Eukaryota_unclassified;Eukaryota_unclassified;Eukaryota_unclassified	2	4.96224e-06	Eukaryota_unclassified			NCBI Hits Summary
OTU1187	Unclassified;	Unclassified;	Eukaryota;Eukaryota_unclassified;Eukaryota_unclassified;Eukaryota_unclassified;Eukaryota_unclassified;Eukaryota_unclassified	2	4.96224e-06	Eukaryota_unclassified			NCBI Hits Summary
OTU1188	unclassified sequences;metagenomes;	Eukaryota;SAR;Stramenopiles;Labyrinthulomycetes;Amphitraemidae;	Eukaryota;Eukaryota_unclassified;Eukaryota_unclassified;Eukaryota_unclassified;Eukaryota_unclassified;Eukaryota_unclassified	2	4.96224e-06	Eukaryota_unclassified	FPLS01026079	0.920973	NCBI Hits Summary
OTU1189	Eukaryota;Fungi;Dikarya;Ascomycota;Saccharomycotina;Saccharomycetes;Saccharomycetales;Saccharomycetaceae;Zygosaccharomyces;	Eukaryota;Amorphea;Obazoa;Opisthokonta;Nucletmycea;Fungi;Dikarya;Ascomycota;Saccharomycotina;Saccharomycetes;Saccharomycetales;Saccharomycetaceae;Zygosaccharomyces;	Eukaryota;Ascomycota;Saccharomycetes;Saccharomycetales;Saccharomycetaceae;Zygosaccharomyces	2	4.96224e-06	Ascomycota	CP019493,CP019500,X91083,AB986211	1,1,1,0.99284	NCBI Hits Summary
OTU1191	Eukaryota;environmental samples;	Eukaryota;SAR;Alveolata;	Eukaryota;Dinoflagellata;Dinophyceae;Gymnodiniphycidae;Gymnodinium_clade;Gymnodinium_clade_unclassified	2	4.96224e-06	Dinoflagellata	KJ758547,DQ103871,DQ103860,KJ758214,KJ757452,KJ757985,KJ759537,KJ759489	0.954407,0.954407,0.951368,0.951368,0.951368,0.951368,0.951368,0.951368	NCBI Hits Summary
OTU1192	unclassified sequences;metagenomes;	Eukaryota;SAR;Rhizaria;Cercozoa;Cercomonadidae;uncultured;	Eukaryota;Cercozoa;Cercomonadidae;Cercomonadidae_or;Cercomonadidae_fa;Cercomonadidae_fa_unclassified	2	4.96224e-06	Cercozoa			NCBI Hits Summary
OTU1194	Eukaryota;environmental samples;	Eukaryota;SAR;Alveolata;	Eukaryota;Dinoflagellata;Dinophyceae;Dinophyceae_unclassified;Dinophyceae_unclassified;Dinophyceae_unclassified	2	4.96224e-06	Dinoflagellata	DQ103871,KJ758547,KJ758214,KJ758254,KJ757985,KJ759489,KJ757452,DQ103860	0.945455,0.945455,0.942424,0.942424,0.942424,0.942424,0.942424,0.942424	NCBI Hits Summary
OTU1197	Eukaryota;environmental samples;	Eukaryota;SAR;Alveolata;	Eukaryota;Dinoflagellata;Dinophyceae;Gymnodiniphycidae;Gymnodinium_clade;Gymnodinium_clade_unclassified	2	4.96224e-06	Dinoflagellata	KJ758547,KJ758159,DQ103871,KJ757985,AF022196,KJ759537,KJ757452,KJ758254	0.951662,0.951662,0.951662,0.94864,0.94864,0.94864,0.94864,0.94864	NCBI Hits Summary
OTU1198	Eukaryota;environmental samples;	Eukaryota;SAR;Alveolata;	Eukaryota;Dinoflagellata;Dinophyceae;Gymnodiniphycidae;Gymnodinium_clade;Gymnodinium_clade_unclassified	2	4.96224e-06	Dinoflagellata	KJ758547,DQ103871,KJ759537,KJ757452,KJ758254,FJ947037,KJ759489,KJ757985	0.948485,0.948485,0.945455,0.945455,0.945455,0.945455,0.945455,0.945455	NCBI Hits Summary
OTU1199	Eukaryota;	Eukaryota;SAR;Alveolata;	Eukaryota;Dinoflagellata;Dinophyceae;Dinophyceae_unclassified;Dinophyceae_unclassified;Dinophyceae_unclassified	2	4.96224e-06	Dinoflagellata	KJ758547,DQ103871,KJ757452,DQ103860,KJ759537,KJ759489,AF022196,KJ758254	0.921212,0.921212,0.918182,0.918182,0.918182,0.918182,0.918182,0.918182	NCBI Hits Summary
OTU1202	Eukaryota;environmental samples;	Eukaryota;SAR;Alveolata;	Eukaryota;Dinoflagellata;Dinophyceae;Gymnodiniphycidae;Gymnodiniphycidae_unclassified;Gymnodiniphycidae_unclassified	2	4.96224e-06	Dinoflagellata	KJ757452,KJ757899,AF022196,KJ758112,KJ757985,KJ759537,KJ763663,KJ757977	0.907692,0.907692,0.907692,0.907692,0.904615,0.904615,0.904615,0.904615	NCBI Hits Summary
OTU1203	Eukaryota;environmental samples;	Eukaryota;SAR;Alveolata;	Eukaryota;Dinoflagellata;Dinophyceae;Gymnodiniphycidae;Gymnodinium_clade;Gymnodinium_clade_unclassified	2	4.96224e-06	Dinoflagellata	KJ758547,DQ103871,DQ103860,KJ758214,FJ947037,KJ757452,KJ759489,KJ759537	0.951515,0.951515,0.948485,0.948485,0.948485,0.948485,0.948485,0.948485	NCBI Hits Summary
OTU1204	Unclassified;	Unclassified;	Eukaryota;Eukaryota_unclassified;Eukaryota_unclassified;Eukaryota_unclassified;Eukaryota_unclassified;Eukaryota_unclassified	2	4.96224e-06	Eukaryota_unclassified			NCBI Hits Summary
OTU1206	Eukaryota;environmental samples;	Eukaryota;SAR;Alveolata;	Eukaryota;Dinoflagellata;Dinophyceae;Gymnodiniphycidae;Gymnodinium_clade;Gymnodinium_clade_ge	2	4.96224e-06	Dinoflagellata	KJ758547,DQ103871,KJ758254,AF022196,KJ757452,KJ759537,KJ759489,DQ103860	0.945455,0.945455,0.942424,0.942424,0.942424,0.942424,0.942424,0.942424	NCBI Hits Summary
OTU1207	Unclassified;	Unclassified;	Eukaryota;Dinoflagellata;Dinophyceae;Dinophyceae_unclassified;Dinophyceae_unclassified;Dinophyceae_unclassified	2	4.96224e-06	Dinoflagellata			NCBI Hits Summary
OTU1208	Eukaryota;	Eukaryota;Archaeplastida;Chloroplastida;Chlorophyta;Chlorophyceae;	Eukaryota;Chlorophyta_ph;Chlorophyceae;Chlorophyceae_or;Chlorophyceae_fa;Chlorophyceae_ge	2	4.96224e-06	Chlorophyta	JN090871	1	NCBI Hits Summary
OTU1209	Eukaryota;	Eukaryota;SAR;Alveolata;Dinoflagellata;Dinophyceae;	Eukaryota;Dinoflagellata;Dinophyceae;Dinophyceae_unclassified;Dinophyceae_unclassified;Dinophyceae_unclassified	2	#N/A	Dinoflagellata	KC771146,LC054949,KJ763731,JF791103,KJ763426,KJ760672,KJ762965	0.986711,0.9701,0.9701,0.9701,0.9701,0.9701,0.9701	NCBI Hits Summary
OTU1210	Unclassified;	Unclassified;	Eukaryota;Eukaryota_unclassified;Eukaryota_unclassified;Eukaryota_unclassified;Eukaryota_unclassified;Eukaryota_unclassified	2	4.96224e-06	Eukaryota_unclassified			NCBI Hits Summary
OTU1211	Unclassified;	Unclassified;	Eukaryota;Eukaryota_unclassified;Eukaryota_unclassified;Eukaryota_unclassified;Eukaryota_unclassified;Eukaryota_unclassified	2	4.96224e-06	Eukaryota_unclassified			NCBI Hits Summary
OTU1213	Eukaryota;	Eukaryota;SAR;Alveolata;	Eukaryota;Dinoflagellata;Dinophyceae;Dinophyceae_unclassified;Dinophyceae_unclassified;Dinophyceae_unclassified	2	#N/A	Dinoflagellata	KJ758547,DQ103871,KJ758214,KJ758254,DQ103860,FJ947037,KJ759537,KJ757985	0.947531,0.947531,0.944444,0.944444,0.944444,0.944444,0.944444,0.944444	NCBI Hits Summary
OTU1218	Eukaryota;environmental samples;	Eukaryota;SAR;Alveolata;	Eukaryota;Dinoflagellata;Dinophyceae;Dinophyceae_unclassified;Dinophyceae_unclassified;Dinophyceae_unclassified	2	4.96224e-06	Dinoflagellata	KC771146,KJ762965,KJ760672,KJ763426,DQ103862,KJ758116,KJ763230,KJ762730	0.948012,0.938838,0.938838,0.938838,0.938838,0.938838,0.938838,0.938838	NCBI Hits Summary
OTU1221	Eukaryota;	Eukaryota;SAR;Alveolata;	Eukaryota;Dinoflagellata;Dinophyceae;Gymnodiniphycidae;Gymnodinium_clade;Gymnodinium_clade_ge	2	#N/A	Dinoflagellata	AF022196,DQ103871,KJ758547,KJ757985,KJ758214,KJ759537,KJ758254	0.960486,0.957447,0.957447,0.954407,0.954407,0.954407,0.954407	NCBI Hits Summary
OTU1222	Unclassified;	Eukaryota;SAR;Alveolata;	Eukaryota;Eukaryota_unclassified;Eukaryota_unclassified;Eukaryota_unclassified;Eukaryota_unclassified;Eukaryota_unclassified	2	4.96224e-06	Eukaryota_unclassified	DQ244032	0.972308	NCBI Hits Summary
OTU1223	Eukaryota;	Eukaryota;SAR;Alveolata;Dinoflagellata;Dinophyceae;	Eukaryota;Dinoflagellata;Dinophyceae;Dinophyceae_unclassified;Dinophyceae_unclassified;Dinophyceae_unclassified	2	4.96224e-06	Dinoflagellata	KC771146,KJ758043	0.909091,0.902597	NCBI Hits Summary
OTU1225	Unclassified;	Unclassified;	Eukaryota;Eukaryota_unclassified;Eukaryota_unclassified;Eukaryota_unclassified;Eukaryota_unclassified;Eukaryota_unclassified	2	4.96224e-06	Eukaryota_unclassified			NCBI Hits Summary
OTU1226	Eukaryota;	Eukaryota;SAR;Alveolata;Dinoflagellata;Dinophyceae;	Eukaryota;Dinoflagellata;Dinophyceae;Dinophyceae_unclassified;Dinophyceae_unclassified;Dinophyceae_unclassified	2	4.96224e-06	Dinoflagellata	GU295203,KJ758334,KJ757816,KJ758106,KJ757777	0.942424,0.939394,0.936364,0.936364,0.936364	NCBI Hits Summary
OTU1227	Eukaryota;	Eukaryota;SAR;Alveolata;	Eukaryota;Dinoflagellata;Dinophyceae;Dinophyceae_unclassified;Dinophyceae_unclassified;Dinophyceae_unclassified	2	4.96224e-06	Dinoflagellata	KC771146,AY251288,FN557541,DQ103862,KR535601,EU371138,HM581709	0.993485,0.983713,0.983713,0.983713,0.983713,0.980456,0.980456	NCBI Hits Summary
OTU1229	Eukaryota;environmental samples;	Eukaryota;SAR;Alveolata;	Eukaryota;Dinoflagellata;Dinophyceae;Dinophyceae_unclassified;Dinophyceae_unclassified;Dinophyceae_unclassified	2	4.96224e-06	Dinoflagellata	KC771146,KJ763731,KJ758116,KJ760672,KJ763230,KJ759690,KJ763426	0.951662,0.939577,0.939577,0.939577,0.939577,0.939577,0.939577	NCBI Hits Summary
OTU1230	Eukaryota;environmental samples;	Eukaryota;SAR;Alveolata;	Eukaryota;Dinoflagellata;Dinophyceae;Dinophyceae_unclassified;Dinophyceae_unclassified;Dinophyceae_unclassified	2	4.96224e-06	Dinoflagellata	KC771146,KJ762730,KJ758116,KJ760672,KJ763426,KJ763230,KJ759690,HM066998	0.92284,0.916667,0.916667,0.916667,0.916667,0.916667,0.916667,0.916667	NCBI Hits Summary
OTU1231	Eukaryota;	Eukaryota;SAR;Alveolata;Dinoflagellata;Dinophyceae;Gymnodiniphycidae;Suessiaceae;Symbiodinium;	Eukaryota;Dinoflagellata;Dinophyceae;Dinophyceae_unclassified;Dinophyceae_unclassified;Dinophyceae_unclassified	2	4.96224e-06	Dinoflagellata	GU067954	0.918182	NCBI Hits Summary
OTU1233	Eukaryota;	Eukaryota;SAR;Alveolata;	Eukaryota;Dinoflagellata;Dinophyceae;Dinophyceae_unclassified;Dinophyceae_unclassified;Dinophyceae_unclassified	2	9.92447e-06	Dinoflagellata	KC771146,KJ757942,KJ760672,KJ763731,KJ758116,KR535601,KJ763230	0.963636,0.954545,0.951515,0.951515,0.951515,0.951515,0.951515	NCBI Hits Summary
OTU1235	Unclassified;	Unclassified;	Eukaryota;Ciliophora;Intramacronucleata;Intramacronucleata_unclassified;Intramacronucleata_unclassified;Intramacronucleata_unclassified	2	1.98489e-05	Ciliophora			NCBI Hits Summary
OTU1237	Eukaryota;	Eukaryota;SAR;Alveolata;Ciliophora;Intramacronucleata;Litostomatea;	Eukaryota;Ciliophora;Intramacronucleata;Litostomatea;Litostomatea_unclassified;Litostomatea_unclassified	2	1.48867e-05	Ciliophora	DQ487196	0.943709	NCBI Hits Summary
OTU1238	Eukaryota;Viridiplantae;Chlorophyta;Trebouxiophyceae;	Eukaryota;Archaeplastida;Chloroplastida;Chlorophyta;Trebouxiophyceae;	Eukaryota;Chlorophyta_ph;Chlorophyta_ph_unclassified;Chlorophyta_ph_unclassified;Chlorophyta_ph_unclassified;Chlorophyta_ph_unclassified	2	4.96224e-06	Chlorophyta/Trebouxiophyceae	AF278744	0.984802	NCBI Hits Summary
OTU1242	Eukaryota;	Eukaryota;SAR;Alveolata;	Eukaryota;Eukaryota_unclassified;Eukaryota_unclassified;Eukaryota_unclassified;Eukaryota_unclassified;Eukaryota_unclassified	2	4.96224e-06	Eukaryota_unclassified	KC771146,LC054949,KJ760672,FN557541,KJ763731,KJ758116,KJ764413	0.960606,0.954545,0.951515,0.951515,0.951515,0.951515,0.951515	NCBI Hits Summary
OTU1243	Eukaryota;	Eukaryota;Amorphea;Obazoa;Opisthokonta;Nucletmycea;Fungi;	Eukaryota;Eukaryota_unclassified;Eukaryota_unclassified;Eukaryota_unclassified;Eukaryota_unclassified;Eukaryota_unclassified	2	4.96224e-06	Eukaryota_unclassified	EF024199,AF026586,AY752969,AY654888,MH915577,AY752965	0.92381,0.911111,0.907937,0.907937,0.907937,0.907937	NCBI Hits Summary
OTU1244	Eukaryota;environmental samples;	Eukaryota;SAR;Alveolata;	Eukaryota;Dinoflagellata;Dinophyceae;Dinophyceae_unclassified;Dinophyceae_unclassified;Dinophyceae_unclassified	2	4.96224e-06	Dinoflagellata	KC771146,KJ763230,KJ760672,KJ763426,KJ758116,KJ759690,KJ762730	0.951515,0.939394,0.939394,0.939394,0.939394,0.939394,0.939394	NCBI Hits Summary
OTU1246	Eukaryota;	Eukaryota;SAR;Alveolata;Dinoflagellata;Dinophyceae;	Eukaryota;Dinoflagellata;Dinophyceae;Dinophyceae_unclassified;Dinophyceae_unclassified;Dinophyceae_unclassified	2	4.96224e-06	Dinoflagellata	KC771146,DQ103862	0.948485,0.939394	NCBI Hits Summary
OTU1252	Eukaryota;environmental samples;	Eukaryota;SAR;Stramenopiles;Ochrophyta;Chrysophyceae;uncultured;	Eukaryota;Ochrophyta_ph;Chrysophyceae;Chrysophyceae_unclassified;Chrysophyceae_unclassified;Chrysophyceae_unclassified	2	4.96224e-06	Chrysophyceae	AY919768,AY919740,AY919813,AY919793,AY919678	0.993355,0.993355,0.993355,0.986711,0.986711	NCBI Hits Summary
OTU1253	Unclassified;	Unclassified;	Eukaryota;Eukaryota_unclassified;Eukaryota_unclassified;Eukaryota_unclassified;Eukaryota_unclassified;Eukaryota_unclassified	2	2.48112e-05	Eukaryota_unclassified			NCBI Hits Summary
OTU1254	Eukaryota;	Eukaryota;SAR;Alveolata;Ciliophora;Intramacronucleata;Spirotrichea;	Eukaryota;Ciliophora;Intramacronucleata;Intramacronucleata_unclassified;Intramacronucleata_unclassified;Intramacronucleata_unclassified	2	1.48867e-05	Ciliophora	GU290112,KU525298,AY498652,MG603606,JX461344	0.931464,0.925234,0.925234,0.919003,0.919003	NCBI Hits Summary
OTU1255	Eukaryota;Stramenopiles;Bacillariophyta;Coscinodiscophyceae;Coscinodiscophycidae;Aulacoseiraceae;Aulacoseira;	Eukaryota;SAR;Stramenopiles;Ochrophyta;Diatomea;Coscinodiscophytina;Melosirids;Aulacoseira;	Eukaryota;Diatomea;Coscinodiscophytina_cl;Coscinodiscophytina_or;Melosirids;Aulacoseira	2	1.48867e-05	Bacillariophyceae	AY121820	0.966667	NCBI Hits Summary
OTU1257	Unclassified;	Eukaryota;SAR;Alveolata;Ciliophora;Intramacronucleata;Spirotrichea;Oligotrichia;	Eukaryota;Ciliophora;Intramacronucleata;Spirotrichea;Spirotrichea_unclassified;Spirotrichea_unclassified	2	4.96224e-06	Ciliophora	FPLK01002665,KJ762361,KJ609051	0.950311,0.934783,0.934783	NCBI Hits Summary
OTU1259	Unclassified;	Unclassified;	Eukaryota;Ciliophora;Intramacronucleata;Spirotrichea;Spirotrichea_unclassified;Spirotrichea_unclassified	2	4.96224e-06	Ciliophora			NCBI Hits Summary
OTU1260	Eukaryota;	Eukaryota;SAR;Stramenopiles;Ochrophyta;Dictyochophyceae;Pedinellales;	Eukaryota;Ochrophyta_ph;Dictyochophyceae;Pedinellales;Pedinellales_fa;Pedinellales_ge	2	4.96224e-06	Dictyochophyceae	GU068032,DQ647512,HQ710562,AB081517	0.951515,0.942424,0.942424,0.939394	NCBI Hits Summary
OTU1261	Eukaryota;Fungi;Dikarya;Basidiomycota;	Eukaryota;Amorphea;Obazoa;Opisthokonta;Nucletmycea;Fungi;Dikarya;Basidiomycota;	Eukaryota;Cryptomycota;uncultured_cl;uncultured_or;uncultured_fa;uncultured_ge	2	4.96224e-06	Basidiomycota/Cryptomycota	DQ974210,DQ092916,AY665775,DQ834913,DQ873640,DQ873658,DQ520100,AY662669	0.942308,0.939103,0.939103,0.939103,0.939103,0.939103,0.939103,0.939103	NCBI Hits Summary
OTU1262	Unclassified;	Eukaryota;SAR;Stramenopiles;Ochrophyta;Chrysophyceae;	Eukaryota;Ochrophyta_ph;Chrysophyceae;Chrysophyceae_unclassified;Chrysophyceae_unclassified;Chrysophyceae_unclassified	2	4.96224e-06	Chrysophyceae	CEOE01007823,MG674910,EF024325,AY651081,FR865768,U73232,FPLS01022061	0.95107,0.95107,0.95107,0.948012,0.944954,0.944954,0.944954	NCBI Hits Summary
OTU1266	Eukaryota;	Eukaryota;Amorphea;Amoebozoa;Gracilipodida;Flamella;	Eukaryota;Eukaryota_unclassified;Eukaryota_unclassified;Eukaryota_unclassified;Eukaryota_unclassified;Eukaryota_unclassified	2	4.96224e-06	Eukaryota_unclassified	KU886213	0.953125	NCBI Hits Summary
OTU1268	Unclassified;	Eukaryota;Discoba;Discicristata;Euglenozoa;Kinetoplastea;Metakinetoplastina;	Eukaryota;Euglenozoa;Kinetoplastea;Kinetoplastea_unclassified;Kinetoplastea_unclassified;Kinetoplastea_unclassified	2	1.48867e-05	Kinetoplastea	CEPZ01003950,AY753978,DQ207572	0.943284,0.934328,0.934328	NCBI Hits Summary
OTU1269	Unclassified;	Unclassified;	Eukaryota;Eukaryota_unclassified;Eukaryota_unclassified;Eukaryota_unclassified;Eukaryota_unclassified;Eukaryota_unclassified	2	4.96224e-06	Eukaryota_unclassified			NCBI Hits Summary
OTU1271	Eukaryota;	Eukaryota;SAR;	Eukaryota;Diatomea;Coscinodiscophytina_cl;Fragilariales;Fragilariales_fa;Ulnaria	2	4.96224e-06	Bacillariophyceae	EF465476,EF423422,KJ757846	0.918182,0.918182,0.915152	NCBI Hits Summary
OTU1275	Eukaryota;	Eukaryota;SAR;Alveolata;	Eukaryota;Dinoflagellata;Dinophyceae;Gymnodiniphycidae;Gymnodinium_clade;Gymnodinium_clade_unclassified	2	4.96224e-06	Dinoflagellata	DQ103871,DQ103860,KJ759537,KJ758254,KJ757452,KJ758214,AF022196	0.983923,0.980707,0.977492,0.977492,0.977492,0.977492,0.977492	NCBI Hits Summary
OTU1277	Unclassified;	Unclassified;	Eukaryota;Eukaryota_unclassified;Eukaryota_unclassified;Eukaryota_unclassified;Eukaryota_unclassified;Eukaryota_unclassified	2	4.96224e-06	Eukaryota_unclassified			NCBI Hits Summary
OTU1278	Eukaryota;environmental samples;	Eukaryota;SAR;Alveolata;	Eukaryota;Dinoflagellata;Dinophyceae;Gymnodiniphycidae;Gymnodinium_clade;Gymnodinium_clade_unclassified	2	4.96224e-06	Dinoflagellata	KJ758547,DQ103871,KJ758254,DQ103860,AF022196,KJ757985,KJ759489,KJ759537	0.954819,0.954819,0.951807,0.951807,0.951807,0.951807,0.951807,0.951807	NCBI Hits Summary
OTU728	Eukaryota;	Eukaryota;SAR;Alveolata;Dinoflagellata;Dinophyceae;	Eukaryota;Dinoflagellata;Dinophyceae;Peridiniphycidae_or;Thoracosphaeraceae;Thoracosphaeraceae_unclassified	1	4.96224e-06	Dinoflagellata	KC771146,JN090875,AY121856	0.969697,0.966667,0.963636	NCBI Hits Summary
OTU904	Eukaryota;Fungi;Dikarya;Ascomycota;Saccharomycotina;Saccharomycetes;Saccharomycetales;Pichiaceae;Brettanomyces;	Eukaryota;Amorphea;Obazoa;Opisthokonta;Nucletmycea;Fungi;Dikarya;Ascomycota;Saccharomycotina;Saccharomycetes;Saccharomycetales;Pichiaceae;Brettanomyces;	Eukaryota;Ascomycota;Saccharomycetes;Saccharomycetales;Pichiaceae;Brettanomyces	1	#N/A	Ascomycota	EF550395,X83814,AM850055,JQ698898,X83815,EU011734,X83820,EF550396	1,1,1,1,1,1,0.990196,0.990196	NCBI Hits Summary
OTU910	Eukaryota;environmental samples;	Eukaryota;SAR;Alveolata;	Eukaryota;Dinoflagellata;Dinophyceae;Gymnodiniphycidae;Gymnodinium_clade;Gymnodinium_clade_ge	1	#N/A	Dinoflagellata	DQ103871,KJ759537,KJ759489,KJ758547,KJ757985,KJ758322,KJ758254,KJ757452	0.936364,0.936364,0.936364,0.936364,0.936364,0.933333,0.933333,0.933333	NCBI Hits Summary
OTU1217	Eukaryota;environmental samples;	Eukaryota;SAR;Alveolata;	Eukaryota;Dinoflagellata;Dinophyceae;Gymnodiniphycidae;Gymnodiniphycidae_unclassified;Gymnodiniphycidae_unclassified	1	#N/A	Dinoflagellata	DQ103860,DQ103871,KJ759537,KJ758254,KJ759489,KJ758393,KJ758209	0.963526,0.960486,0.957447,0.957447,0.957447,0.957447,0.957447	NCBI Hits Summary
