# Supplementary material
Source: MDPI journal article supplement (https://www.mdpi.com/1424-2818/15/4/572)
Supplement: s1 [file s1 › Table S4.xlsx]

## Sheet: Apr
Table S4. Abundance of OTUs having significant differences between FL and PA communities in April
id	is_major	is_shared	is_major_shared	contrast	group1_mean	group2_mean	log2FoldChange	padj	slv_Phylum	slv_Class	slv_Order	slv_Family	slv_Genus	fw_kingdom	fw_phylum	fw_class	fw_order	fw_lineage	fw_clade	fw_tribe
OTU173	no	yes	no	group_AprFL_vs_AprPA	0	2	-4.00554	0.001686	Actinobacteriota	Acidimicrobiia	Microtrichales	Iamiaceae	Iamia	Bacteria	Actinobacteriota	Acidimicrobiia	Microtrichales	Iamiaceae	Iamia	unclassified
OTU7	yes	yes	yes	group_AprFL_vs_AprPA	133	30	2.10728	0.00521255	Actinobacteriota	Acidimicrobiia	Microtrichales	Ilumatobacteraceae	CL500-29_marine_group	Bacteria	Actinobacteriota	Acidimicrobiia	Microtrichales	acIV	acIV-B	Iluma-B1
OTU8	yes	yes	yes	group_AprFL_vs_AprPA	834	106	2.96853	1.05207e-06	Actinobacteriota	Acidimicrobiia	Microtrichales	Ilumatobacteraceae	CL500-29_marine_group	Bacteria	Actinobacteriota	Acidimicrobiia	Microtrichales	acIV	acIV-A	Iluma-A2
OTU9	yes	yes	yes	group_AprFL_vs_AprPA	930	126	2.87423	1.96758e-05	Actinobacteriota	Acidimicrobiia	Microtrichales	Ilumatobacteraceae	CL500-29_marine_group	Bacteria	Actinobacteriota	Acidimicrobiia	Microtrichales	acIV	acIV-A	Iluma-A1
OTU10	yes	yes	yes	group_AprFL_vs_AprPA	145	31	2.17979	0.000278806	Actinobacteriota	Acidimicrobiia	Microtrichales	Ilumatobacteraceae	CL500-29_marine_group	Bacteria	Actinobacteriota	Acidimicrobiia	Microtrichales	acIV	acIV-C	Iluma-C1
OTU14	yes	yes	yes	group_AprFL_vs_AprPA	133	29	2.18641	0.00754224	Actinobacteriota	Acidimicrobiia	Microtrichales	Ilumatobacteraceae	CL500-29_marine_group	Bacteria	Actinobacteriota	Acidimicrobiia	Microtrichales	acIV	acIV-B	unclassified
OTU44	yes	yes	yes	group_AprFL_vs_AprPA	53	2	4.53326	1.12726e-15	Actinobacteriota	Acidimicrobiia	Microtrichales	Ilumatobacteraceae	CL500-29_marine_group	Bacteria	Actinobacteriota	Acidimicrobiia	Microtrichales	Ilumatobacteraceae	CL500-29_marine_group	unclassified
OTU102	yes	yes	yes	group_AprFL_vs_AprPA	33	2	3.77355	1.53514e-09	Actinobacteriota	Acidimicrobiia	Microtrichales	Ilumatobacteraceae	CL500-29_marine_group	Bacteria	Actinobacteriota	Acidimicrobiia	Microtrichales	Ilumatobacteraceae	CL500-29_marine_group	unclassified
OTU105	yes	yes	yes	group_AprFL_vs_AprPA	11	1	3.38813	0.00011158	Actinobacteriota	Acidimicrobiia	Microtrichales	Ilumatobacteraceae	CL500-29_marine_group	Bacteria	Actinobacteriota	Acidimicrobiia	Microtrichales	Ilumatobacteraceae	CL500-29_marine_group	unclassified
OTU108	no	yes	no	group_AprFL_vs_AprPA	15	1	3.29417	2.9943e-05	Actinobacteriota	Acidimicrobiia	Microtrichales	Ilumatobacteraceae	CL500-29_marine_group	Bacteria	Actinobacteriota	Acidimicrobiia	Microtrichales	acIV	acIV-C	unclassified
OTU117	yes	yes	yes	group_AprFL_vs_AprPA	19	1	3.64861	1.68996e-06	Actinobacteriota	Acidimicrobiia	Microtrichales	Ilumatobacteraceae	CL500-29_marine_group	Bacteria	Actinobacteriota	Acidimicrobiia	Microtrichales	Ilumatobacteraceae	CL500-29_marine_group	unclassified
OTU119	yes	yes	yes	group_AprFL_vs_AprPA	20	1	3.62189	8.72276e-07	Actinobacteriota	Acidimicrobiia	Microtrichales	Ilumatobacteraceae	CL500-29_marine_group	Bacteria	Actinobacteriota	Acidimicrobiia	Microtrichales	Ilumatobacteraceae	CL500-29_marine_group	unclassified
OTU140	yes	yes	yes	group_AprFL_vs_AprPA	17	1	3.68944	1.92317e-06	Actinobacteriota	Acidimicrobiia	Microtrichales	Ilumatobacteraceae	CL500-29_marine_group	Bacteria	Actinobacteriota	Acidimicrobiia	Microtrichales	Ilumatobacteraceae	CL500-29_marine_group	unclassified
OTU149	no	yes	no	group_AprFL_vs_AprPA	13	1	3.69679	1.59561e-05	Actinobacteriota	Acidimicrobiia	Microtrichales	Ilumatobacteraceae	CL500-29_marine_group	Bacteria	Actinobacteriota	Acidimicrobiia	Microtrichales	Ilumatobacteraceae	CL500-29_marine_group	unclassified
OTU163	no	yes	no	group_AprFL_vs_AprPA	13	0	5.1805	4.13976e-07	Actinobacteriota	Acidimicrobiia	Microtrichales	Ilumatobacteraceae	CL500-29_marine_group	Bacteria	Actinobacteriota	Acidimicrobiia	Microtrichales	Ilumatobacteraceae	CL500-29_marine_group	unclassified
OTU204	no	yes	no	group_AprFL_vs_AprPA	10	0	4.8133	3.43623e-06	Actinobacteriota	Acidimicrobiia	Microtrichales	Ilumatobacteraceae	CL500-29_marine_group	Bacteria	Actinobacteriota	Acidimicrobiia	Microtrichales	Ilumatobacteraceae	CL500-29_marine_group	unclassified
OTU208	no	no	no	group_AprFL_vs_AprPA	0	5	-5.01747	1.35811e-05	Actinobacteriota	Acidimicrobiia	Microtrichales	Ilumatobacteraceae	CL500-29_marine_group	Bacteria	Actinobacteriota	Acidimicrobiia	Microtrichales	Ilumatobacteraceae	CL500-29_marine_group	unclassified
OTU227	no	yes	no	group_AprFL_vs_AprPA	5	0	3.43559	0.00341787	Actinobacteriota	Acidimicrobiia	Microtrichales	Ilumatobacteraceae	CL500-29_marine_group	Bacteria	Actinobacteriota	Acidimicrobiia	Microtrichales	Ilumatobacteraceae	CL500-29_marine_group	unclassified
OTU244	no	yes	no	group_AprFL_vs_AprPA	5	0	3.4218	0.00332188	Actinobacteriota	Acidimicrobiia	Microtrichales	Ilumatobacteraceae	CL500-29_marine_group	Bacteria	Actinobacteriota	Acidimicrobiia	Microtrichales	Ilumatobacteraceae	CL500-29_marine_group	unclassified
OTU249	no	yes	no	group_AprFL_vs_AprPA	14	0	5.67269	2.53603e-08	Actinobacteriota	Acidimicrobiia	Microtrichales	Ilumatobacteraceae	CL500-29_marine_group	Bacteria	Actinobacteriota	Acidimicrobiia	Microtrichales	Ilumatobacteraceae	CL500-29_marine_group	unclassified
OTU258	yes	yes	yes	group_AprFL_vs_AprPA	27	1	4.03348	4.62974e-08	Actinobacteriota	Acidimicrobiia	Microtrichales	Ilumatobacteraceae	CL500-29_marine_group	Bacteria	Actinobacteriota	Acidimicrobiia	Microtrichales	Ilumatobacteraceae	CL500-29_marine_group	unclassified
OTU287	yes	yes	yes	group_AprFL_vs_AprPA	32	0	5.15815	3.67227e-10	Actinobacteriota	Acidimicrobiia	Microtrichales	Ilumatobacteraceae	CL500-29_marine_group	Bacteria	Actinobacteriota	Acidimicrobiia	Microtrichales	Ilumatobacteraceae	CL500-29_marine_group	unclassified
OTU316	yes	yes	yes	group_AprFL_vs_AprPA	15	1	3.44261	1.11091e-05	Actinobacteriota	Acidimicrobiia	Microtrichales	Ilumatobacteraceae	CL500-29_marine_group	Bacteria	Actinobacteriota	Acidimicrobiia	Microtrichales	Ilumatobacteraceae	CL500-29_marine_group	unclassified
OTU318	yes	yes	yes	group_AprFL_vs_AprPA	25	2	3.37154	4.13976e-07	Actinobacteriota	Acidimicrobiia	Microtrichales	Ilumatobacteraceae	CL500-29_marine_group	Bacteria	Actinobacteriota	Acidimicrobiia	Microtrichales	Ilumatobacteraceae	CL500-29_marine_group	unclassified
OTU325	no	yes	no	group_AprFL_vs_AprPA	10	0	5.09898	7.32154e-06	Actinobacteriota	Acidimicrobiia	Microtrichales	Ilumatobacteraceae	CL500-29_marine_group	Bacteria	Actinobacteriota	Acidimicrobiia	Microtrichales	Ilumatobacteraceae	CL500-29_marine_group	unclassified
OTU334	yes	yes	yes	group_AprFL_vs_AprPA	27	1	4.70158	3.16805e-08	Actinobacteriota	Acidimicrobiia	Microtrichales	Ilumatobacteraceae	CL500-29_marine_group	Bacteria	Actinobacteriota	Acidimicrobiia	Microtrichales	Ilumatobacteraceae	CL500-29_marine_group	unclassified
OTU357	no	yes	no	group_AprFL_vs_AprPA	5	0	4.66032	1.98296e-05	Actinobacteriota	Acidimicrobiia	Microtrichales	Ilumatobacteraceae	CL500-29_marine_group	Bacteria	Actinobacteriota	Acidimicrobiia	Microtrichales	Ilumatobacteraceae	CL500-29_marine_group	unclassified
OTU368	no	yes	no	group_AprFL_vs_AprPA	13	1	3.71449	2.45263e-05	Actinobacteriota	Acidimicrobiia	Microtrichales	Ilumatobacteraceae	CL500-29_marine_group	Bacteria	Actinobacteriota	Acidimicrobiia	Microtrichales	Ilumatobacteraceae	CL500-29_marine_group	unclassified
OTU370	no	yes	no	group_AprFL_vs_AprPA	19	0	4.66395	8.03527e-07	Actinobacteriota	Acidimicrobiia	Microtrichales	Ilumatobacteraceae	CL500-29_marine_group	Bacteria	Actinobacteriota	Acidimicrobiia	Microtrichales	Ilumatobacteraceae	CL500-29_marine_group	unclassified
OTU384	no	no	no	group_AprFL_vs_AprPA	2	0	3.71185	0.00570199	Actinobacteriota	Acidimicrobiia	Microtrichales	Ilumatobacteraceae	CL500-29_marine_group	Bacteria	Actinobacteriota	Acidimicrobiia	Microtrichales	Ilumatobacteraceae	CL500-29_marine_group	unclassified
OTU387	no	yes	no	group_AprFL_vs_AprPA	7	0	4.36716	0.000133871	Actinobacteriota	Acidimicrobiia	Microtrichales	Ilumatobacteraceae	CL500-29_marine_group	Bacteria	Actinobacteriota	Acidimicrobiia	Microtrichales	Ilumatobacteraceae	CL500-29_marine_group	unclassified
OTU407	no	yes	no	group_AprFL_vs_AprPA	3	0	3.98693	0.00116823	Actinobacteriota	Acidimicrobiia	Microtrichales	Ilumatobacteraceae	CL500-29_marine_group	Bacteria	Actinobacteriota	Acidimicrobiia	Microtrichales	Ilumatobacteraceae	CL500-29_marine_group	unclassified
OTU409	no	yes	no	group_AprFL_vs_AprPA	11	0	5.30717	4.13976e-07	Actinobacteriota	Acidimicrobiia	Microtrichales	Ilumatobacteraceae	CL500-29_marine_group	Bacteria	Actinobacteriota	Acidimicrobiia	Microtrichales	Ilumatobacteraceae	CL500-29_marine_group	unclassified
OTU435	no	yes	no	group_AprFL_vs_AprPA	6	0	3.72773	0.000673094	Actinobacteriota	Acidimicrobiia	Microtrichales	Ilumatobacteraceae	CL500-29_marine_group	Bacteria	Actinobacteriota	Acidimicrobiia	Microtrichales	Ilumatobacteraceae	CL500-29_marine_group	unclassified
OTU440	no	yes	no	group_AprFL_vs_AprPA	4	0	3.58544	0.00247317	Actinobacteriota	Acidimicrobiia	Microtrichales	Ilumatobacteraceae	CL500-29_marine_group	Bacteria	Actinobacteriota	Acidimicrobiia	Microtrichales	Ilumatobacteraceae	CL500-29_marine_group	unclassified
OTU450	no	yes	no	group_AprFL_vs_AprPA	4	0	4.25712	0.000311191	Actinobacteriota	Acidimicrobiia	Microtrichales	Ilumatobacteraceae	CL500-29_marine_group	Bacteria	Actinobacteriota	Acidimicrobiia	Microtrichales	Ilumatobacteraceae	CL500-29_marine_group	unclassified
OTU461	no	yes	no	group_AprFL_vs_AprPA	5	0	3.19821	0.00513446	Actinobacteriota	Acidimicrobiia	Microtrichales	Ilumatobacteraceae	CL500-29_marine_group	Bacteria	Actinobacteriota	Acidimicrobiia	Microtrichales	Ilumatobacteraceae	CL500-29_marine_group	unclassified
OTU465	no	yes	no	group_AprFL_vs_AprPA	4	0	4.42038	0.000468441	Actinobacteriota	Acidimicrobiia	Microtrichales	Ilumatobacteraceae	CL500-29_marine_group	Bacteria	Actinobacteriota	Acidimicrobiia	Microtrichales	Ilumatobacteraceae	CL500-29_marine_group	unclassified
OTU474	no	yes	no	group_AprFL_vs_AprPA	5	0	3.94652	0.000311191	Actinobacteriota	Acidimicrobiia	Microtrichales	Ilumatobacteraceae	CL500-29_marine_group	Bacteria	Actinobacteriota	Acidimicrobiia	Microtrichales	Ilumatobacteraceae	CL500-29_marine_group	unclassified
OTU481	no	yes	no	group_AprFL_vs_AprPA	4	0	4.15571	0.000429795	Actinobacteriota	Acidimicrobiia	Microtrichales	Ilumatobacteraceae	CL500-29_marine_group	Bacteria	Actinobacteriota	Acidimicrobiia	Microtrichales	Ilumatobacteraceae	CL500-29_marine_group	unclassified
OTU489	no	yes	no	group_AprFL_vs_AprPA	7	0	4.61002	2.86766e-05	Actinobacteriota	Acidimicrobiia	Microtrichales	Ilumatobacteraceae	CL500-29_marine_group	Bacteria	Actinobacteriota	Acidimicrobiia	Microtrichales	Ilumatobacteraceae	CL500-29_marine_group	unclassified
OTU498	no	yes	no	group_AprFL_vs_AprPA	2	0	3.58615	0.00414677	Actinobacteriota	Acidimicrobiia	Microtrichales	Ilumatobacteraceae	CL500-29_marine_group	Bacteria	Actinobacteriota	Acidimicrobiia	Microtrichales	Ilumatobacteraceae	CL500-29_marine_group	unclassified
OTU512	no	yes	no	group_AprFL_vs_AprPA	9	0	4.56751	1.23614e-05	Actinobacteriota	Acidimicrobiia	Microtrichales	Ilumatobacteraceae	CL500-29_marine_group	Bacteria	Actinobacteriota	Acidimicrobiia	Microtrichales	Ilumatobacteraceae	CL500-29_marine_group	unclassified
OTU517	no	yes	no	group_AprFL_vs_AprPA	6	0	3.41906	0.00197183	Actinobacteriota	Acidimicrobiia	Microtrichales	Ilumatobacteraceae	CL500-29_marine_group	Bacteria	Actinobacteriota	Acidimicrobiia	Microtrichales	Ilumatobacteraceae	CL500-29_marine_group	unclassified
OTU528	no	yes	no	group_AprFL_vs_AprPA	9	0	4.65265	8.9061e-06	Actinobacteriota	Acidimicrobiia	Microtrichales	Ilumatobacteraceae	CL500-29_marine_group	Bacteria	Actinobacteriota	Acidimicrobiia	Microtrichales	Ilumatobacteraceae	CL500-29_marine_group	unclassified
OTU529	no	yes	no	group_AprFL_vs_AprPA	5	0	4.13946	0.000429795	Actinobacteriota	Acidimicrobiia	Microtrichales	Ilumatobacteraceae	CL500-29_marine_group	Bacteria	Actinobacteriota	Acidimicrobiia	Microtrichales	Ilumatobacteraceae	CL500-29_marine_group	unclassified
OTU537	no	yes	no	group_AprFL_vs_AprPA	4	0	4.36456	0.000278806	Actinobacteriota	Acidimicrobiia	Microtrichales	Ilumatobacteraceae	CL500-29_marine_group	Bacteria	Actinobacteriota	Acidimicrobiia	Microtrichales	Ilumatobacteraceae	CL500-29_marine_group	unclassified
OTU557	no	yes	no	group_AprFL_vs_AprPA	4	0	3.8328	0.00149296	Actinobacteriota	Acidimicrobiia	Microtrichales	Ilumatobacteraceae	CL500-29_marine_group	Bacteria	Actinobacteriota	Acidimicrobiia	Microtrichales	Ilumatobacteraceae	CL500-29_marine_group	unclassified
OTU561	no	yes	no	group_AprFL_vs_AprPA	3	0	4.0478	0.00139457	Actinobacteriota	Acidimicrobiia	Microtrichales	Ilumatobacteraceae	CL500-29_marine_group	Bacteria	Actinobacteriota	Acidimicrobiia	Microtrichales	Ilumatobacteraceae	CL500-29_marine_group	unclassified
OTU569	no	yes	no	group_AprFL_vs_AprPA	2	0	3.58065	0.00369322	Actinobacteriota	Acidimicrobiia	Microtrichales	Ilumatobacteraceae	CL500-29_marine_group	Bacteria	Actinobacteriota	Acidimicrobiia	Microtrichales	Ilumatobacteraceae	CL500-29_marine_group	unclassified
OTU582	no	yes	no	group_AprFL_vs_AprPA	3	0	3.58094	0.00521255	Actinobacteriota	Acidimicrobiia	Microtrichales	Ilumatobacteraceae	CL500-29_marine_group	Bacteria	Actinobacteriota	Acidimicrobiia	Microtrichales	Ilumatobacteraceae	CL500-29_marine_group	unclassified
OTU600	no	yes	no	group_AprFL_vs_AprPA	13	0	3.65324	1.23614e-05	Actinobacteriota	Acidimicrobiia	Microtrichales	Ilumatobacteraceae	CL500-29_marine_group	Bacteria	Actinobacteriota	Acidimicrobiia	Microtrichales	Ilumatobacteraceae	CL500-29_marine_group	unclassified
OTU621	no	yes	no	group_AprFL_vs_AprPA	4	0	4.26961	0.000598165	Actinobacteriota	Acidimicrobiia	Microtrichales	Ilumatobacteraceae	CL500-29_marine_group	Bacteria	Actinobacteriota	Acidimicrobiia	Microtrichales	Ilumatobacteraceae	CL500-29_marine_group	unclassified
OTU702	no	yes	no	group_AprFL_vs_AprPA	6	0	4.10172	0.000269134	Actinobacteriota	Acidimicrobiia	Microtrichales	Ilumatobacteraceae	CL500-29_marine_group	Bacteria	Actinobacteriota	Acidimicrobiia	Microtrichales	Ilumatobacteraceae	CL500-29_marine_group	unclassified
OTU728	no	yes	no	group_AprFL_vs_AprPA	3	0	3.54419	0.00736148	Actinobacteriota	Acidimicrobiia	Microtrichales	Ilumatobacteraceae	CL500-29_marine_group	Bacteria	Actinobacteriota	Acidimicrobiia	Microtrichales	Ilumatobacteraceae	CL500-29_marine_group	unclassified
OTU733	yes	yes	yes	group_AprFL_vs_AprPA	21	0	4.52735	1.66489e-07	Actinobacteriota	Acidimicrobiia	Microtrichales	Ilumatobacteraceae	CL500-29_marine_group	Bacteria	Actinobacteriota	Acidimicrobiia	Microtrichales	Ilumatobacteraceae	CL500-29_marine_group	unclassified
OTU736	no	yes	no	group_AprFL_vs_AprPA	3	0	3.51964	0.00465024	Actinobacteriota	Acidimicrobiia	Microtrichales	Ilumatobacteraceae	CL500-29_marine_group	Bacteria	Actinobacteriota	Acidimicrobiia	Microtrichales	Ilumatobacteraceae	CL500-29_marine_group	unclassified
OTU777	no	yes	no	group_AprFL_vs_AprPA	7	0	4.66006	1.11091e-05	Actinobacteriota	Acidimicrobiia	Microtrichales	Ilumatobacteraceae	CL500-29_marine_group	Bacteria	Actinobacteriota	Acidimicrobiia	Microtrichales	Ilumatobacteraceae	CL500-29_marine_group	unclassified
OTU903	no	yes	no	group_AprFL_vs_AprPA	7	0	4.70962	7.60988e-06	Actinobacteriota	Acidimicrobiia	Microtrichales	Ilumatobacteraceae	CL500-29_marine_group	Bacteria	Actinobacteriota	Acidimicrobiia	Microtrichales	Ilumatobacteraceae	CL500-29_marine_group	unclassified
OTU987	no	no	no	group_AprFL_vs_AprPA	3	0	4.12225	0.00341787	Actinobacteriota	Acidimicrobiia	Microtrichales	Ilumatobacteraceae	CL500-29_marine_group	Bacteria	Actinobacteriota	Acidimicrobiia	Microtrichales	Ilumatobacteraceae	CL500-29_marine_group	unclassified
OTU1002	no	no	no	group_AprFL_vs_AprPA	3	0	4.11615	0.00085947	Actinobacteriota	Acidimicrobiia	Microtrichales	Ilumatobacteraceae	CL500-29_marine_group	Bacteria	Actinobacteriota	Acidimicrobiia	Microtrichales	Ilumatobacteraceae	CL500-29_marine_group	unclassified
OTU1017	no	yes	no	group_AprFL_vs_AprPA	3	0	3.56158	0.00764096	Actinobacteriota	Acidimicrobiia	Microtrichales	Ilumatobacteraceae	CL500-29_marine_group	Bacteria	Actinobacteriota	Acidimicrobiia	Microtrichales	Ilumatobacteraceae	CL500-29_marine_group	unclassified
OTU1148	no	yes	no	group_AprFL_vs_AprPA	6	0	3.48122	0.00247317	Actinobacteriota	Acidimicrobiia	Microtrichales	Ilumatobacteraceae	CL500-29_marine_group	Bacteria	Actinobacteriota	Acidimicrobiia	Microtrichales	Ilumatobacteraceae	CL500-29_marine_group	unclassified
OTU1210	yes	yes	yes	group_AprFL_vs_AprPA	12	0	4.06173	1.11091e-05	Actinobacteriota	Acidimicrobiia	Microtrichales	Ilumatobacteraceae	CL500-29_marine_group	Bacteria	Actinobacteriota	Acidimicrobiia	Microtrichales	Ilumatobacteraceae	CL500-29_marine_group	unclassified
OTU1471	no	yes	no	group_AprFL_vs_AprPA	3	0	4.0834	0.000944078	Actinobacteriota	Acidimicrobiia	Microtrichales	Ilumatobacteraceae	CL500-29_marine_group	Bacteria	Actinobacteriota	Acidimicrobiia	Microtrichales	Ilumatobacteraceae	CL500-29_marine_group	unclassified
OTU1664	no	no	no	group_AprFL_vs_AprPA	3	0	3.98943	0.00385354	Actinobacteriota	Acidimicrobiia	Microtrichales	Ilumatobacteraceae	CL500-29_marine_group	Bacteria	Actinobacteriota	Acidimicrobiia	Microtrichales	Ilumatobacteraceae	CL500-29_marine_group	unclassified
OTU1757	no	no	no	group_AprFL_vs_AprPA	4	0	4.18424	0.00208116	Actinobacteriota	Acidimicrobiia	Microtrichales	Ilumatobacteraceae	CL500-29_marine_group	Bacteria	Actinobacteriota	Acidimicrobiia	Microtrichales	Ilumatobacteraceae	CL500-29_marine_group	unclassified
OTU1785	no	yes	no	group_AprFL_vs_AprPA	4	0	3.89225	0.000805088	Actinobacteriota	Acidimicrobiia	Microtrichales	Ilumatobacteraceae	CL500-29_marine_group	Bacteria	Actinobacteriota	Acidimicrobiia	Microtrichales	Ilumatobacteraceae	CL500-29_marine_group	unclassified
OTU1885	no	yes	no	group_AprFL_vs_AprPA	6	0	4.17324	8.56389e-05	Actinobacteriota	Acidimicrobiia	Microtrichales	Ilumatobacteraceae	CL500-29_marine_group	Bacteria	Actinobacteriota	Acidimicrobiia	Microtrichales	Ilumatobacteraceae	CL500-29_marine_group	unclassified
OTU2065	no	yes	no	group_AprFL_vs_AprPA	2	0	3.59483	0.00375772	Actinobacteriota	Acidimicrobiia	Microtrichales	Ilumatobacteraceae	CL500-29_marine_group	Bacteria	Actinobacteriota	Acidimicrobiia	Microtrichales	Ilumatobacteraceae	CL500-29_marine_group	unclassified
OTU2410	no	yes	no	group_AprFL_vs_AprPA	4	0	3.34444	0.00372694	Actinobacteriota	Acidimicrobiia	Microtrichales	Ilumatobacteraceae	CL500-29_marine_group	Bacteria	Actinobacteriota	Acidimicrobiia	Microtrichales	Ilumatobacteraceae	CL500-29_marine_group	unclassified
OTU2881	no	no	no	group_AprFL_vs_AprPA	2	0	3.70048	0.00936289	Actinobacteriota	Acidimicrobiia	Microtrichales	Ilumatobacteraceae	CL500-29_marine_group	Bacteria	Actinobacteriota	Acidimicrobiia	Microtrichales	Ilumatobacteraceae	CL500-29_marine_group	unclassified
OTU3297	no	yes	no	group_AprFL_vs_AprPA	4	0	3.47652	0.00753334	Actinobacteriota	Acidimicrobiia	Microtrichales	Ilumatobacteraceae	CL500-29_marine_group	Bacteria	Actinobacteriota	Acidimicrobiia	Microtrichales	Ilumatobacteraceae	CL500-29_marine_group	unclassified
OTU3443	no	no	no	group_AprFL_vs_AprPA	2	0	3.591	0.00736148	Actinobacteriota	Acidimicrobiia	Microtrichales	Ilumatobacteraceae	CL500-29_marine_group	Bacteria	Actinobacteriota	Acidimicrobiia	Microtrichales	Ilumatobacteraceae	CL500-29_marine_group	unclassified
OTU3791	no	yes	no	group_AprFL_vs_AprPA	3	0	3.76218	0.00375772	Actinobacteriota	Acidimicrobiia	Microtrichales	Ilumatobacteraceae	CL500-29_marine_group	Bacteria	Actinobacteriota	Acidimicrobiia	Microtrichales	Ilumatobacteraceae	CL500-29_marine_group	unclassified
OTU4386	no	yes	no	group_AprFL_vs_AprPA	9	0	4.58682	9.04931e-06	Actinobacteriota	Acidimicrobiia	Microtrichales	Ilumatobacteraceae	CL500-29_marine_group	Bacteria	Actinobacteriota	Acidimicrobiia	Microtrichales	Ilumatobacteraceae	CL500-29_marine_group	unclassified
OTU4585	no	yes	no	group_AprFL_vs_AprPA	5	0	3.77504	0.00103687	Actinobacteriota	Acidimicrobiia	Microtrichales	Ilumatobacteraceae	CL500-29_marine_group	Bacteria	Actinobacteriota	Acidimicrobiia	Microtrichales	Ilumatobacteraceae	CL500-29_marine_group	unclassified
OTU49	yes	yes	yes	group_AprFL_vs_AprPA	0	40	-6.33051	6.81929e-12	Actinobacteriota	Acidimicrobiia	Microtrichales	Microtrichaceae	IMCC26207	Bacteria	Actinobacteriota	Acidimicrobiia	Microtrichales	Microtrichaceae	IMCC26207	unclassified
OTU165	no	yes	no	group_AprFL_vs_AprPA	0	2	-3.80258	0.00341787	Actinobacteriota	Acidimicrobiia	Microtrichales	uncultured	uncultured_ge	Bacteria	Actinobacteriota	Acidimicrobiia	Microtrichales	unclassified	unclassified	unclassified
OTU45	yes	yes	yes	group_AprFL_vs_AprPA	37	7	2.30383	0.00155497	Actinobacteriota	Actinobacteria	Actinobacteria_unclassified	Actinobacteria_unclassified	Actinobacteria_unclassified	Bacteria	Actinobacteriota	Actinobacteria	Frankiales	acSTL	acSTL-A	acSTL-A1
OTU19	yes	yes	yes	group_AprFL_vs_AprPA	147	15	3.20827	0.000207001	Actinobacteriota	Actinobacteria	Frankiales	Sporichthyaceae	hgcI_clade	Bacteria	Actinobacteriota	Actinobacteria	Frankiales	acI	acI-B	acI-B1
OTU65	yes	yes	yes	group_AprFL_vs_AprPA	51	5	3.25091	5.60529e-06	Actinobacteriota	Actinobacteria	Frankiales	Sporichthyaceae	hgcI_clade	Bacteria	Actinobacteriota	Actinobacteria	Frankiales	acI	acI-A	acI-A5
OTU78	yes	yes	yes	group_AprFL_vs_AprPA	39	5	2.89683	2.47643e-05	Actinobacteriota	Actinobacteria	Frankiales	Sporichthyaceae	hgcI_clade	Bacteria	Actinobacteriota	Actinobacteria	Frankiales	acI	acI-C	acI-C1
OTU86	yes	yes	yes	group_AprFL_vs_AprPA	40	2	3.97778	5.6162e-07	Actinobacteriota	Actinobacteria	Frankiales	Sporichthyaceae	hgcI_clade	Bacteria	Actinobacteriota	Actinobacteria	Frankiales	acI	acI-A	acI-A4
OTU200	no	yes	no	group_AprFL_vs_AprPA	9	1	2.32699	0.00479883	Actinobacteriota	Actinobacteria	Frankiales	Sporichthyaceae	hgcI_clade	Bacteria	Actinobacteriota	Actinobacteria	Frankiales	acI	acI-C	unclassified
OTU216	yes	no	no	group_AprFL_vs_AprPA	41	7	2.53528	0.00385354	Actinobacteriota	Actinobacteria	Frankiales	Sporichthyaceae	hgcI_clade	Bacteria	Actinobacteriota	Actinobacteria	Frankiales	Sporichthyaceae	hgcI_clade	unclassified
OTU256	no	no	no	group_AprFL_vs_AprPA	4	0	3.95517	0.000963513	Actinobacteriota	Actinobacteria	Frankiales	Sporichthyaceae	hgcI_clade	Bacteria	Actinobacteriota	Actinobacteria	Frankiales	acI	acI-C	acI-C2
OTU470	no	no	no	group_AprFL_vs_AprPA	3	0	3.66371	0.00772145	Actinobacteriota	Actinobacteria	Frankiales	Sporichthyaceae	hgcI_clade	Bacteria	Actinobacteriota	Actinobacteria	Frankiales	Sporichthyaceae	hgcI_clade	unclassified
OTU494	no	no	no	group_AprFL_vs_AprPA	8	0	4.42409	0.000179522	Actinobacteriota	Actinobacteria	Frankiales	Sporichthyaceae	hgcI_clade	Bacteria	Actinobacteriota	Actinobacteria	Frankiales	Sporichthyaceae	hgcI_clade	unclassified
OTU527	no	no	no	group_AprFL_vs_AprPA	5	0	4.67293	2.70282e-05	Actinobacteriota	Actinobacteria	Frankiales	Sporichthyaceae	hgcI_clade	Bacteria	Actinobacteriota	Actinobacteria	Frankiales	Sporichthyaceae	hgcI_clade	unclassified
OTU573	no	no	no	group_AprFL_vs_AprPA	6	0	4.53344	0.000150081	Actinobacteriota	Actinobacteria	Frankiales	Sporichthyaceae	hgcI_clade	Bacteria	Actinobacteriota	Actinobacteria	Frankiales	Sporichthyaceae	hgcI_clade	unclassified
OTU807	no	no	no	group_AprFL_vs_AprPA	7	0	4.98042	3.29102e-05	Actinobacteriota	Actinobacteria	Frankiales	Sporichthyaceae	hgcI_clade	Bacteria	Actinobacteriota	Actinobacteria	Frankiales	Sporichthyaceae	hgcI_clade	unclassified
OTU1393	no	yes	no	group_AprFL_vs_AprPA	6	0	4.39836	0.000139487	Actinobacteriota	Actinobacteria	Frankiales	Sporichthyaceae	hgcI_clade	Bacteria	Actinobacteriota	Actinobacteria	Frankiales	Sporichthyaceae	hgcI_clade	unclassified
OTU2227	no	no	no	group_AprFL_vs_AprPA	4	0	3.89388	0.00157152	Actinobacteriota	Actinobacteria	Frankiales	Sporichthyaceae	hgcI_clade	Bacteria	Actinobacteriota	Actinobacteria	Frankiales	Sporichthyaceae	hgcI_clade	unclassified
OTU356	no	yes	no	group_AprFL_vs_AprPA	10	0	4.01271	0.000158145	Actinobacteriota	Actinobacteria	Frankiales	Sporichthyaceae	Sporichthyaceae_ge	Bacteria	Actinobacteriota	Actinobacteria	Frankiales	Sporichthyaceae	unclassified	unclassified
OTU611	no	yes	no	group_AprFL_vs_AprPA	7	0	4.94965	1.18976e-05	Actinobacteriota	Actinobacteria	Frankiales	Sporichthyaceae	Sporichthyaceae_ge	Bacteria	Actinobacteriota	Actinobacteria	Frankiales	Sporichthyaceae	unclassified	unclassified
OTU2031	no	no	no	group_AprFL_vs_AprPA	2	0	3.61623	0.00975907	Actinobacteriota	Actinobacteria	Frankiales	Sporichthyaceae	Sporichthyaceae_ge	Bacteria	Actinobacteriota	Actinobacteria	Frankiales	Sporichthyaceae	unclassified	unclassified
OTU3	yes	yes	yes	group_AprFL_vs_AprPA	428	35	3.58719	1.92189e-07	Actinobacteriota	Actinobacteria	Frankiales	Sporichthyaceae	Sporichthyaceae_unclassified	Bacteria	Actinobacteriota	Actinobacteria	Frankiales	acI	acI-A	acI-A7
OTU93	yes	yes	yes	group_AprFL_vs_AprPA	21	0	6.19106	6.50224e-10	Actinobacteriota	Actinobacteria	Frankiales	Sporichthyaceae	Sporichthyaceae_unclassified	Bacteria	Actinobacteriota	Actinobacteria	Frankiales	acI	acI-A	acI-A1
OTU168	no	no	no	group_AprFL_vs_AprPA	18	0	4.91496	8.9061e-06	Actinobacteriota	Actinobacteria	Frankiales	Sporichthyaceae	Sporichthyaceae_unclassified	Bacteria	Actinobacteriota	Actinobacteria	Frankiales	Sporichthyaceae	unclassified	unclassified
OTU197	no	yes	no	group_AprFL_vs_AprPA	16	1	3.30798	3.39699e-05	Actinobacteriota	Actinobacteria	Frankiales	Sporichthyaceae	Sporichthyaceae_unclassified	Bacteria	Actinobacteriota	Actinobacteria	Frankiales	Sporichthyaceae	unclassified	unclassified
OTU266	no	yes	no	group_AprFL_vs_AprPA	13	2	2.62816	0.00233096	Actinobacteriota	Actinobacteria	Frankiales	Sporichthyaceae	Sporichthyaceae_unclassified	Bacteria	Actinobacteriota	Actinobacteria	Frankiales	Sporichthyaceae	Candidatus_Planktophila	unclassified
OTU345	yes	yes	yes	group_AprFL_vs_AprPA	23	2	3.44675	8.03527e-07	Actinobacteriota	Actinobacteria	Frankiales	Sporichthyaceae	Sporichthyaceae_unclassified	Bacteria	Actinobacteriota	Actinobacteria	Frankiales	acI	acI-A	unclassified
OTU840	no	yes	no	group_AprFL_vs_AprPA	10	0	4.14026	0.000100315	Actinobacteriota	Actinobacteria	Frankiales	Sporichthyaceae	Sporichthyaceae_unclassified	Bacteria	Actinobacteriota	Actinobacteria	Frankiales	Sporichthyaceae	unclassified	unclassified
OTU951	no	no	no	group_AprFL_vs_AprPA	3	0	3.8905	0.00390221	Actinobacteriota	Actinobacteria	Frankiales	Sporichthyaceae	Sporichthyaceae_unclassified	Bacteria	Actinobacteriota	Actinobacteria	Frankiales	Sporichthyaceae	hgcI_clade	unclassified
OTU984	yes	yes	yes	group_AprFL_vs_AprPA	36	0	5.56733	1.53514e-09	Actinobacteriota	Actinobacteria	Frankiales	Sporichthyaceae	Sporichthyaceae_unclassified	Bacteria	Actinobacteriota	Actinobacteria	Frankiales	Sporichthyaceae	hgcI_clade	unclassified
OTU994	no	yes	no	group_AprFL_vs_AprPA	6	0	3.31109	0.00688182	Actinobacteriota	Actinobacteria	Frankiales	Sporichthyaceae	Sporichthyaceae_unclassified	Bacteria	Actinobacteriota	Actinobacteria	Frankiales	Sporichthyaceae	unclassified	unclassified
OTU2171	no	yes	no	group_AprFL_vs_AprPA	4	0	3.81	0.00238842	Actinobacteriota	Actinobacteria	Frankiales	Sporichthyaceae	Sporichthyaceae_unclassified	Bacteria	Actinobacteriota	Actinobacteria	Frankiales	Sporichthyaceae	hgcI_clade	unclassified
OTU2769	no	no	no	group_AprFL_vs_AprPA	3	0	3.62565	0.00526083	Actinobacteriota	Actinobacteria	Frankiales	Sporichthyaceae	Sporichthyaceae_unclassified	Bacteria	Actinobacteriota	Actinobacteria	Frankiales	Sporichthyaceae	Candidatus_Planktophila	unclassified
OTU162	no	yes	no	group_AprFL_vs_AprPA	0	16	-4.64074	2.9943e-05	Actinobacteriota	Actinobacteria	Propionibacteriales	Propionibacteriaceae	Cutibacterium	Bacteria	Actinobacteriota	Actinobacteria	Propionibacteriales	Propionibacteriaceae	Cutibacterium	unclassified
OTU207	no	no	no	group_AprFL_vs_AprPA	0	2	-4.00007	0.00190075	Actinobacteriota	Actinobacteria	uncultured	uncultured_fa	uncultured_ge	Bacteria	Actinobacteriota	Actinobacteria	unclassified	unclassified	unclassified	unclassified
OTU57	yes	no	no	group_AprFL_vs_AprPA	2	16	-2.92971	0.00031787	Armatimonadota	Armatimonadia	Armatimonadales	Armatimonadaceae	Armatimonas	Bacteria	Armatimonadota	Armatimonadia	Armatimonadales	Armatimonadaceae	Armatimonas	unclassified
OTU116	yes	no	no	group_AprFL_vs_AprPA	0	2	-3.29714	0.009341	Bacteroidota	Bacteroidia	Bacteroidia_unclassified	Bacteroidia_unclassified	Bacteroidia_unclassified	Bacteria	Bacteroidota	Bacteroidia	unclassified	unclassified	unclassified	unclassified
OTU23	yes	no	no	group_AprFL_vs_AprPA	179	31	2.48767	0.00479883	Bacteroidota	Bacteroidia	Flavobacteriales	Flavobacteriaceae	Flavobacterium	Bacteria	Bacteroidota	Bacteroidia	Flavobacteriales	bacII	bacII-A	Flavo-A1
OTU145	no	no	no	group_AprFL_vs_AprPA	12	1	3.20327	0.00133051	Bacteroidota	Bacteroidia	Flavobacteriales	Flavobacteriaceae	Flavobacterium	Bacteria	Bacteroidota	Bacteroidia	Flavobacteriales	Flavobacteriaceae	Flavobacterium	unclassified
OTU181	yes	no	no	group_AprFL_vs_AprPA	5	0	3.91896	0.00158409	Bacteroidota	Bacteroidia	Flavobacteriales	Flavobacteriaceae	Flavobacterium	Bacteria	Bacteroidota	Bacteroidia	Flavobacteriales	bacII	bacII-A	unclassified
OTU281	no	no	no	group_AprFL_vs_AprPA	12	0	5.04942	0.000247996	Bacteroidota	Bacteroidia	Flavobacteriales	Flavobacteriaceae	Flavobacterium	Bacteria	Bacteroidota	Bacteroidia	Flavobacteriales	Flavobacteriaceae	Flavobacterium	unclassified
OTU884	no	no	no	group_AprFL_vs_AprPA	5	0	4.21768	0.00779661	Bacteroidota	Bacteroidia	Flavobacteriales	Flavobacteriaceae	Flavobacterium	Bacteria	Bacteroidota	Bacteroidia	Flavobacteriales	Flavobacteriaceae	Flavobacterium	unclassified
OTU1461	no	no	no	group_AprFL_vs_AprPA	7	0	4.73736	0.00012232	Bacteroidota	Bacteroidia	Flavobacteriales	Flavobacteriaceae	Flavobacterium	Bacteria	Bacteroidota	Bacteroidia	Flavobacteriales	Flavobacteriaceae	Flavobacterium	unclassified
OTU127	yes	no	no	group_AprFL_vs_AprPA	0	4	-4.668	3.39485e-05	Bacteroidota	Bacteroidia	Flavobacteriales	NS9_marine_group	NS9_marine_group_ge	Bacteria	Bacteroidota	Bacteroidia	Flavobacteriales	NS9_marine_group	unclassified	unclassified
OTU169	no	no	no	group_AprFL_vs_AprPA	0	3	-3.88409	0.00233096	Bacteroidota	Bacteroidia	Sphingobacteriales	env.OPS_17	env.OPS_17_ge	Bacteria	Bacteroidota	Bacteroidia	Sphingobacteriales	env.OPS_17	unclassified	unclassified
OTU29	yes	no	no	group_AprFL_vs_AprPA	22	1	3.8901	0.000354267	Crenarchaeota	Nitrososphaeria	Nitrosopumilales	Nitrosopumilaceae	Nitrosarchaeum	Archaea	Crenarchaeota	Nitrososphaeria	Nitrosopumilales	Nitrosopumilaceae	Nitrosarchaeum	unclassified
OTU4	yes	yes	yes	group_AprFL_vs_AprPA	57	2	4.26399	5.22203e-05	Crenarchaeota	Nitrososphaeria	Nitrosopumilales	Nitrosopumilaceae	Nitrosopumilaceae_unclassified	Archaea	Crenarchaeota	Nitrososphaeria	Nitrosopumilales	Nitrosopumilaceae	unclassified	unclassified
OTU11	yes	yes	yes	group_AprFL_vs_AprPA	74	600	-3.01718	1.20753e-05	Cyanobacteria	Cyanobacteriia	Synechococcales	Cyanobiaceae	Cyanobium_PCC-6307	Bacteria	Cyanobacteria	Cyanobacteriia	Synechococcales	Cyanobiaceae	Cyanobium_PCC-6307	unclassified
OTU101	yes	yes	yes	group_AprFL_vs_AprPA	329	49	2.73479	7.82383e-05	Cyanobacteria	Cyanobacteriia	Synechococcales	Cyanobiaceae	Cyanobium_PCC-6307	Bacteria	Cyanobacteria	Cyanobacteriia	Synechococcales	Cyanobiaceae	Cyanobium_PCC-6307	unclassified
OTU174	no	yes	no	group_AprFL_vs_AprPA	11	0	3.67933	0.000182703	Cyanobacteria	Cyanobacteriia	Synechococcales	Cyanobiaceae	Cyanobium_PCC-6307	Bacteria	Cyanobacteria	Cyanobacteriia	Synechococcales	Cyanobiaceae	Cyanobium_PCC-6307	unclassified
OTU188	yes	yes	yes	group_AprFL_vs_AprPA	12	0	5.40538	8.83744e-06	Cyanobacteria	Cyanobacteriia	Synechococcales	Cyanobiaceae	Cyanobium_PCC-6307	Bacteria	Cyanobacteria	Cyanobacteriia	Synechococcales	Cyanobiaceae	Cyanobium_PCC-6307	unclassified
OTU372	yes	yes	yes	group_AprFL_vs_AprPA	26	2	3.30222	0.000278806	Cyanobacteria	Cyanobacteriia	Synechococcales	Cyanobiaceae	Cyanobium_PCC-6307	Bacteria	Cyanobacteria	Cyanobacteriia	Synechococcales	Cyanobiaceae	Cyanobium_PCC-6307	unclassified
OTU713	yes	no	no	group_AprFL_vs_AprPA	0	14	-3.8526	4.64334e-06	Cyanobacteria	Cyanobacteriia	Synechococcales	Cyanobiaceae	Cyanobium_PCC-6307	Bacteria	Cyanobacteria	Cyanobacteriia	Synechococcales	Cyanobiaceae	Cyanobium_PCC-6307	unclassified
OTU765	no	yes	no	group_AprFL_vs_AprPA	12	0	4.67154	1.584e-05	Cyanobacteria	Cyanobacteriia	Synechococcales	Cyanobiaceae	Cyanobium_PCC-6307	Bacteria	Cyanobacteria	Cyanobacteriia	Synechococcales	Cyanobiaceae	Cyanobium_PCC-6307	unclassified
OTU1121	no	yes	no	group_AprFL_vs_AprPA	6	0	4.44334	7.73304e-05	Cyanobacteria	Cyanobacteriia	Synechococcales	Cyanobiaceae	Cyanobium_PCC-6307	Bacteria	Cyanobacteria	Cyanobacteriia	Synechococcales	Cyanobiaceae	Cyanobium_PCC-6307	unclassified
OTU347	no	no	no	group_AprFL_vs_AprPA	0	2	-4.06921	0.00680031	Planctomycetota	Phycisphaerae	Phycisphaerales	Phycisphaeraceae	CL500-3	Bacteria	Planctomycetota	Phycisphaerae	Phycisphaerales	Phycisphaeraceae	CL500-3	unclassified
OTU214	no	no	no	group_AprFL_vs_AprPA	0	4	-5.04427	0.000129661	Planctomycetota	Phycisphaerae	Phycisphaerales	Phycisphaeraceae	Phycisphaeraceae_unclassified	Bacteria	Planctomycetota	Phycisphaerae	Phycisphaerales	Phycisphaeraceae	unclassified	unclassified
OTU133	yes	yes	yes	group_AprFL_vs_AprPA	0	5	-4.83878	1.23614e-05	Planctomycetota	Planctomycetes	Pirellulales	Pirellulaceae	Pirellula	Bacteria	Planctomycetota	Planctomycetes	Pirellulales	Pirellulaceae	Pirellula	unclassified
OTU74	yes	yes	yes	group_AprFL_vs_AprPA	0	13	-5.53608	1.03621e-07	Planctomycetota	Planctomycetes	Planctomycetales	Rubinisphaeraceae	uncultured	Bacteria	Planctomycetota	Planctomycetes	Planctomycetales	Rubinisphaeraceae	unclassified	unclassified
OTU52	yes	no	no	group_AprFL_vs_AprPA	0	332	-10.8408	6.70724e-08	Proteobacteria	Alphaproteobacteria	Paracaedibacterales	Paracaedibacteraceae	Candidatus_Finniella	Bacteria	Proteobacteria	Alphaproteobacteria	Paracaedibacterales	Paracaedibacteraceae	Candidatus_Finniella	unclassified
OTU68	yes	yes	yes	group_AprFL_vs_AprPA	2	28	-3.36607	3.35527e-05	Proteobacteria	Alphaproteobacteria	Paracaedibacterales	Paracaedibacteraceae	uncultured	Bacteria	Proteobacteria	Alphaproteobacteria	Paracaedibacterales	Paracaedibacteraceae	unclassified	unclassified
OTU112	no	yes	no	group_AprFL_vs_AprPA	6	0	3.12084	0.00451362	Proteobacteria	Alphaproteobacteria	Rhodobacterales	Rhodobacteraceae	Rhodobacter	Bacteria	Proteobacteria	Alphaproteobacteria	Rhodobacterales	alfVI	unclassified	unclassified
OTU2	yes	yes	yes	group_AprFL_vs_AprPA	213	17	3.59972	4.83122e-05	Proteobacteria	Alphaproteobacteria	SAR11_clade	Clade_III	Clade_III_ge	Bacteria	Proteobacteria	Alphaproteobacteria	SAR11_clade	alfV	alfV-A	LD12
OTU612	no	yes	no	group_AprFL_vs_AprPA	11	1	3.23194	0.000598034	Proteobacteria	Gammaproteobacteria	Burkholderiales	Alcaligenaceae	GKS98_freshwater_group	Bacteria	Proteobacteria	Gammaproteobacteria	Burkholderiales	Alcaligenaceae	GKS98_freshwater_group	unclassified
OTU91	yes	yes	yes	group_AprFL_vs_AprPA	22	2	3.35189	8.46698e-06	Proteobacteria	Gammaproteobacteria	Burkholderiales	Burkholderiaceae	Polynucleobacter	Bacteria	Proteobacteria	Gammaproteobacteria	Burkholderiales	betII	Pnec	PnecB
OTU43	yes	yes	yes	group_AprFL_vs_AprPA	73	11	2.70623	0.00160813	Proteobacteria	Gammaproteobacteria	Burkholderiales	Comamonadaceae	Limnohabitans	Bacteria	Proteobacteria	Gammaproteobacteria	Burkholderiales	betI	betI-A	Lhab-A1
OTU248	no	yes	no	group_AprFL_vs_AprPA	2	0	3.58389	0.00341787	Proteobacteria	Gammaproteobacteria	Burkholderiales	Comamonadaceae	Rhodoferax	Bacteria	Proteobacteria	Gammaproteobacteria	Burkholderiales	betI	betI-B	Rhodo
OTU82	yes	no	no	group_AprFL_vs_AprPA	23	2	3.12245	0.00294296	Proteobacteria	Gammaproteobacteria	Burkholderiales	Methylophilaceae	Candidatus_Methylopumilus	Bacteria	Proteobacteria	Gammaproteobacteria	Burkholderiales	betIV	betIV-A	LD28
OTU96	yes	no	no	group_AprFL_vs_AprPA	0	3	-4.33969	0.000209131	Proteobacteria	Gammaproteobacteria	Gammaproteobacteria_unclassified	Gammaproteobacteria_unclassified	Gammaproteobacteria_unclassified	Bacteria	Proteobacteria	Gammaproteobacteria	unclassified	unclassified	unclassified	unclassified
OTU24	yes	yes	yes	group_AprFL_vs_AprPA	117	2564	-4.44498	2.35739e-31	Verrucomicrobiota	Verrucomicrobiae	Verrucomicrobiales	Rubritaleaceae	Luteolibacter	Bacteria	Verrucomicrobiota	Verrucomicrobiae	Verrucomicrobiales	Rubritaleaceae	Luteolibacter	unclassified
OTU4047	no	no	no	group_AprFL_vs_AprPA	0	5	-5.21914	5.72863e-05	Verrucomicrobiota	Verrucomicrobiae	Verrucomicrobiales	Rubritaleaceae	Luteolibacter	Bacteria	Verrucomicrobiota	Verrucomicrobiae	Verrucomicrobiales	Rubritaleaceae	Luteolibacter	unclassified
OTU84	yes	yes	yes	group_AprFL_vs_AprPA	0	12	-6.46828	1.73753e-09	Verrucomicrobiota	Verrucomicrobiae	Verrucomicrobiales	Verrucomicrobiaceae	uncultured	Bacteria	Verrucomicrobiota	Verrucomicrobiae	Verrucomicrobiales	Verrucomicrobiaceae	unclassified	unclassified
Group and contrasts – a set of samples to be statistically tested for differential abundance; is_major – whether the OTU total relative abundance exceeds 0.1%; is_shared – whether OTU is differentially abundant between FL and PA across all three months; is_major_shared – both conditions are met; group1_mean/ group2_mean – mean normalized count of OTU for reference (first/ second) contrast (same f…

## Sheet: Mar
Table S4. Abundance of OTUs having significant differences between FL and PA communities in March
id	is_major	is_shared	is_major_shared	contrast	group1_mean	group2_mean	log2FoldChange	padj	slv_Phylum	slv_Class	slv_Order	slv_Family	slv_Genus	fw_kingdom	fw_phylum	fw_class	fw_order	fw_lineage	fw_clade	fw_tribe
OTU39	yes	no	no	group_MarFL_vs_MarPA	0	3	-4.08618	0.000445998	Actinobacteriota	Acidimicrobiia	IMCC26256	IMCC26256_fa	IMCC26256_ge	Bacteria	Actinobacteriota	Acidimicrobiia	IMCC26256	unclassified	unclassified	unclassified
OTU173	no	yes	no	group_MarFL_vs_MarPA	0	7	-5.3706	4.00941e-07	Actinobacteriota	Acidimicrobiia	Microtrichales	Iamiaceae	Iamia	Bacteria	Actinobacteriota	Acidimicrobiia	Microtrichales	Iamiaceae	Iamia	unclassified
OTU7	yes	yes	yes	group_MarFL_vs_MarPA	294	14	4.3194	1.97425e-14	Actinobacteriota	Acidimicrobiia	Microtrichales	Ilumatobacteraceae	CL500-29_marine_group	Bacteria	Actinobacteriota	Acidimicrobiia	Microtrichales	acIV	acIV-B	Iluma-B1
OTU8	yes	yes	yes	group_MarFL_vs_MarPA	687	21	5.0303	3.52467e-22	Actinobacteriota	Acidimicrobiia	Microtrichales	Ilumatobacteraceae	CL500-29_marine_group	Bacteria	Actinobacteriota	Acidimicrobiia	Microtrichales	acIV	acIV-A	Iluma-A2
OTU9	yes	yes	yes	group_MarFL_vs_MarPA	741	19	5.26807	6.41751e-21	Actinobacteriota	Acidimicrobiia	Microtrichales	Ilumatobacteraceae	CL500-29_marine_group	Bacteria	Actinobacteriota	Acidimicrobiia	Microtrichales	acIV	acIV-A	Iluma-A1
OTU10	yes	yes	yes	group_MarFL_vs_MarPA	209	35	2.56115	9.07595e-07	Actinobacteriota	Acidimicrobiia	Microtrichales	Ilumatobacteraceae	CL500-29_marine_group	Bacteria	Actinobacteriota	Acidimicrobiia	Microtrichales	acIV	acIV-C	Iluma-C1
OTU14	yes	yes	yes	group_MarFL_vs_MarPA	142	8	4.03709	2.91316e-10	Actinobacteriota	Acidimicrobiia	Microtrichales	Ilumatobacteraceae	CL500-29_marine_group	Bacteria	Actinobacteriota	Acidimicrobiia	Microtrichales	acIV	acIV-B	unclassified
OTU44	yes	yes	yes	group_MarFL_vs_MarPA	87	0	7.50977	1.38867e-20	Actinobacteriota	Acidimicrobiia	Microtrichales	Ilumatobacteraceae	CL500-29_marine_group	Bacteria	Actinobacteriota	Acidimicrobiia	Microtrichales	Ilumatobacteraceae	CL500-29_marine_group	unclassified
OTU102	yes	yes	yes	group_MarFL_vs_MarPA	61	0	7.94455	6.41751e-21	Actinobacteriota	Acidimicrobiia	Microtrichales	Ilumatobacteraceae	CL500-29_marine_group	Bacteria	Actinobacteriota	Acidimicrobiia	Microtrichales	Ilumatobacteraceae	CL500-29_marine_group	unclassified
OTU105	yes	yes	yes	group_MarFL_vs_MarPA	19	0	6.61719	4.53403e-14	Actinobacteriota	Acidimicrobiia	Microtrichales	Ilumatobacteraceae	CL500-29_marine_group	Bacteria	Actinobacteriota	Acidimicrobiia	Microtrichales	Ilumatobacteraceae	CL500-29_marine_group	unclassified
OTU108	no	yes	no	group_MarFL_vs_MarPA	13	0	4.23842	9.57877e-07	Actinobacteriota	Acidimicrobiia	Microtrichales	Ilumatobacteraceae	CL500-29_marine_group	Bacteria	Actinobacteriota	Acidimicrobiia	Microtrichales	acIV	acIV-C	unclassified
OTU117	yes	yes	yes	group_MarFL_vs_MarPA	27	0	7.10945	4.34646e-16	Actinobacteriota	Acidimicrobiia	Microtrichales	Ilumatobacteraceae	CL500-29_marine_group	Bacteria	Actinobacteriota	Acidimicrobiia	Microtrichales	Ilumatobacteraceae	CL500-29_marine_group	unclassified
OTU119	yes	yes	yes	group_MarFL_vs_MarPA	25	0	5.76979	3.65839e-11	Actinobacteriota	Acidimicrobiia	Microtrichales	Ilumatobacteraceae	CL500-29_marine_group	Bacteria	Actinobacteriota	Acidimicrobiia	Microtrichales	Ilumatobacteraceae	CL500-29_marine_group	unclassified
OTU140	yes	yes	yes	group_MarFL_vs_MarPA	16	0	6.36659	5.75509e-13	Actinobacteriota	Acidimicrobiia	Microtrichales	Ilumatobacteraceae	CL500-29_marine_group	Bacteria	Actinobacteriota	Acidimicrobiia	Microtrichales	Ilumatobacteraceae	CL500-29_marine_group	unclassified
OTU149	no	yes	no	group_MarFL_vs_MarPA	18	0	6.22432	2.41748e-12	Actinobacteriota	Acidimicrobiia	Microtrichales	Ilumatobacteraceae	CL500-29_marine_group	Bacteria	Actinobacteriota	Acidimicrobiia	Microtrichales	Ilumatobacteraceae	CL500-29_marine_group	unclassified
OTU163	no	yes	no	group_MarFL_vs_MarPA	10	0	5.77626	2.91316e-10	Actinobacteriota	Acidimicrobiia	Microtrichales	Ilumatobacteraceae	CL500-29_marine_group	Bacteria	Actinobacteriota	Acidimicrobiia	Microtrichales	Ilumatobacteraceae	CL500-29_marine_group	unclassified
OTU204	no	yes	no	group_MarFL_vs_MarPA	10	0	5.67722	5.08887e-10	Actinobacteriota	Acidimicrobiia	Microtrichales	Ilumatobacteraceae	CL500-29_marine_group	Bacteria	Actinobacteriota	Acidimicrobiia	Microtrichales	Ilumatobacteraceae	CL500-29_marine_group	unclassified
OTU227	no	yes	no	group_MarFL_vs_MarPA	11	0	5.8275	3.73385e-10	Actinobacteriota	Acidimicrobiia	Microtrichales	Ilumatobacteraceae	CL500-29_marine_group	Bacteria	Actinobacteriota	Acidimicrobiia	Microtrichales	Ilumatobacteraceae	CL500-29_marine_group	unclassified
OTU244	no	yes	no	group_MarFL_vs_MarPA	7	0	5.30363	2.03761e-08	Actinobacteriota	Acidimicrobiia	Microtrichales	Ilumatobacteraceae	CL500-29_marine_group	Bacteria	Actinobacteriota	Acidimicrobiia	Microtrichales	Ilumatobacteraceae	CL500-29_marine_group	unclassified
OTU249	no	yes	no	group_MarFL_vs_MarPA	10	0	5.66806	1.06893e-09	Actinobacteriota	Acidimicrobiia	Microtrichales	Ilumatobacteraceae	CL500-29_marine_group	Bacteria	Actinobacteriota	Acidimicrobiia	Microtrichales	Ilumatobacteraceae	CL500-29_marine_group	unclassified
OTU258	yes	yes	yes	group_MarFL_vs_MarPA	18	0	6.18197	8.48311e-12	Actinobacteriota	Acidimicrobiia	Microtrichales	Ilumatobacteraceae	CL500-29_marine_group	Bacteria	Actinobacteriota	Acidimicrobiia	Microtrichales	Ilumatobacteraceae	CL500-29_marine_group	unclassified
OTU287	yes	yes	yes	group_MarFL_vs_MarPA	20	0	6.66812	1.01386e-14	Actinobacteriota	Acidimicrobiia	Microtrichales	Ilumatobacteraceae	CL500-29_marine_group	Bacteria	Actinobacteriota	Acidimicrobiia	Microtrichales	Ilumatobacteraceae	CL500-29_marine_group	unclassified
OTU316	yes	yes	yes	group_MarFL_vs_MarPA	23	0	6.24142	1.07061e-12	Actinobacteriota	Acidimicrobiia	Microtrichales	Ilumatobacteraceae	CL500-29_marine_group	Bacteria	Actinobacteriota	Acidimicrobiia	Microtrichales	Ilumatobacteraceae	CL500-29_marine_group	unclassified
OTU318	yes	yes	yes	group_MarFL_vs_MarPA	21	0	6.13429	5.21971e-12	Actinobacteriota	Acidimicrobiia	Microtrichales	Ilumatobacteraceae	CL500-29_marine_group	Bacteria	Actinobacteriota	Acidimicrobiia	Microtrichales	Ilumatobacteraceae	CL500-29_marine_group	unclassified
OTU325	no	yes	no	group_MarFL_vs_MarPA	3	0	4.0367	0.000382598	Actinobacteriota	Acidimicrobiia	Microtrichales	Ilumatobacteraceae	CL500-29_marine_group	Bacteria	Actinobacteriota	Acidimicrobiia	Microtrichales	Ilumatobacteraceae	CL500-29_marine_group	unclassified
OTU334	yes	yes	yes	group_MarFL_vs_MarPA	17	0	6.47225	1.30052e-12	Actinobacteriota	Acidimicrobiia	Microtrichales	Ilumatobacteraceae	CL500-29_marine_group	Bacteria	Actinobacteriota	Acidimicrobiia	Microtrichales	Ilumatobacteraceae	CL500-29_marine_group	unclassified
OTU354	no	no	no	group_MarFL_vs_MarPA	9	1	2.79229	0.00157889	Actinobacteriota	Acidimicrobiia	Microtrichales	Ilumatobacteraceae	CL500-29_marine_group	Bacteria	Actinobacteriota	Acidimicrobiia	Microtrichales	Ilumatobacteraceae	CL500-29_marine_group	unclassified
OTU357	no	yes	no	group_MarFL_vs_MarPA	4	0	4.58748	7.51272e-06	Actinobacteriota	Acidimicrobiia	Microtrichales	Ilumatobacteraceae	CL500-29_marine_group	Bacteria	Actinobacteriota	Acidimicrobiia	Microtrichales	Ilumatobacteraceae	CL500-29_marine_group	unclassified
OTU368	no	yes	no	group_MarFL_vs_MarPA	13	0	6.07525	2.23128e-11	Actinobacteriota	Acidimicrobiia	Microtrichales	Ilumatobacteraceae	CL500-29_marine_group	Bacteria	Actinobacteriota	Acidimicrobiia	Microtrichales	Ilumatobacteraceae	CL500-29_marine_group	unclassified
OTU370	no	yes	no	group_MarFL_vs_MarPA	13	0	6.04902	3.05606e-11	Actinobacteriota	Acidimicrobiia	Microtrichales	Ilumatobacteraceae	CL500-29_marine_group	Bacteria	Actinobacteriota	Acidimicrobiia	Microtrichales	Ilumatobacteraceae	CL500-29_marine_group	unclassified
OTU383	no	no	no	group_MarFL_vs_MarPA	3	0	3.19024	0.00851944	Actinobacteriota	Acidimicrobiia	Microtrichales	Ilumatobacteraceae	CL500-29_marine_group	Bacteria	Actinobacteriota	Acidimicrobiia	Microtrichales	Ilumatobacteraceae	CL500-29_marine_group	unclassified
OTU387	no	yes	no	group_MarFL_vs_MarPA	4	0	4.54376	2.02099e-05	Actinobacteriota	Acidimicrobiia	Microtrichales	Ilumatobacteraceae	CL500-29_marine_group	Bacteria	Actinobacteriota	Acidimicrobiia	Microtrichales	Ilumatobacteraceae	CL500-29_marine_group	unclassified
OTU407	no	yes	no	group_MarFL_vs_MarPA	2	0	3.81271	0.0011261	Actinobacteriota	Acidimicrobiia	Microtrichales	Ilumatobacteraceae	CL500-29_marine_group	Bacteria	Actinobacteriota	Acidimicrobiia	Microtrichales	Ilumatobacteraceae	CL500-29_marine_group	unclassified
OTU409	no	yes	no	group_MarFL_vs_MarPA	7	0	5.19548	8.7363e-08	Actinobacteriota	Acidimicrobiia	Microtrichales	Ilumatobacteraceae	CL500-29_marine_group	Bacteria	Actinobacteriota	Acidimicrobiia	Microtrichales	Ilumatobacteraceae	CL500-29_marine_group	unclassified
OTU422	no	no	no	group_MarFL_vs_MarPA	2	0	3.55048	0.00447395	Actinobacteriota	Acidimicrobiia	Microtrichales	Ilumatobacteraceae	CL500-29_marine_group	Bacteria	Actinobacteriota	Acidimicrobiia	Microtrichales	Ilumatobacteraceae	CL500-29_marine_group	unclassified
OTU435	no	yes	no	group_MarFL_vs_MarPA	7	0	4.92573	1.51851e-07	Actinobacteriota	Acidimicrobiia	Microtrichales	Ilumatobacteraceae	CL500-29_marine_group	Bacteria	Actinobacteriota	Acidimicrobiia	Microtrichales	Ilumatobacteraceae	CL500-29_marine_group	unclassified
OTU439	no	no	no	group_MarFL_vs_MarPA	6	0	5.09223	2.73553e-07	Actinobacteriota	Acidimicrobiia	Microtrichales	Ilumatobacteraceae	CL500-29_marine_group	Bacteria	Actinobacteriota	Acidimicrobiia	Microtrichales	Ilumatobacteraceae	CL500-29_marine_group	unclassified
OTU440	no	yes	no	group_MarFL_vs_MarPA	7	0	5.23263	8.81036e-08	Actinobacteriota	Acidimicrobiia	Microtrichales	Ilumatobacteraceae	CL500-29_marine_group	Bacteria	Actinobacteriota	Acidimicrobiia	Microtrichales	Ilumatobacteraceae	CL500-29_marine_group	unclassified
OTU450	no	yes	no	group_MarFL_vs_MarPA	3	0	4.34045	8.04888e-05	Actinobacteriota	Acidimicrobiia	Microtrichales	Ilumatobacteraceae	CL500-29_marine_group	Bacteria	Actinobacteriota	Acidimicrobiia	Microtrichales	Ilumatobacteraceae	CL500-29_marine_group	unclassified
OTU461	no	yes	no	group_MarFL_vs_MarPA	7	0	5.24529	2.18076e-08	Actinobacteriota	Acidimicrobiia	Microtrichales	Ilumatobacteraceae	CL500-29_marine_group	Bacteria	Actinobacteriota	Acidimicrobiia	Microtrichales	Ilumatobacteraceae	CL500-29_marine_group	unclassified
OTU465	no	yes	no	group_MarFL_vs_MarPA	3	0	4.02349	0.00103921	Actinobacteriota	Acidimicrobiia	Microtrichales	Ilumatobacteraceae	CL500-29_marine_group	Bacteria	Actinobacteriota	Acidimicrobiia	Microtrichales	Ilumatobacteraceae	CL500-29_marine_group	unclassified
OTU467	no	no	no	group_MarFL_vs_MarPA	5	0	3.60025	0.000971868	Actinobacteriota	Acidimicrobiia	Microtrichales	Ilumatobacteraceae	CL500-29_marine_group	Bacteria	Actinobacteriota	Acidimicrobiia	Microtrichales	Ilumatobacteraceae	CL500-29_marine_group	unclassified
OTU474	no	yes	no	group_MarFL_vs_MarPA	5	0	4.44537	6.95677e-06	Actinobacteriota	Acidimicrobiia	Microtrichales	Ilumatobacteraceae	CL500-29_marine_group	Bacteria	Actinobacteriota	Acidimicrobiia	Microtrichales	Ilumatobacteraceae	CL500-29_marine_group	unclassified
OTU481	no	yes	no	group_MarFL_vs_MarPA	2	0	3.57668	0.00255208	Actinobacteriota	Acidimicrobiia	Microtrichales	Ilumatobacteraceae	CL500-29_marine_group	Bacteria	Actinobacteriota	Acidimicrobiia	Microtrichales	Ilumatobacteraceae	CL500-29_marine_group	unclassified
OTU489	no	yes	no	group_MarFL_vs_MarPA	3	0	4.16031	0.000107447	Actinobacteriota	Acidimicrobiia	Microtrichales	Ilumatobacteraceae	CL500-29_marine_group	Bacteria	Actinobacteriota	Acidimicrobiia	Microtrichales	Ilumatobacteraceae	CL500-29_marine_group	unclassified
OTU498	no	yes	no	group_MarFL_vs_MarPA	3	0	4.0994	0.000204806	Actinobacteriota	Acidimicrobiia	Microtrichales	Ilumatobacteraceae	CL500-29_marine_group	Bacteria	Actinobacteriota	Acidimicrobiia	Microtrichales	Ilumatobacteraceae	CL500-29_marine_group	unclassified
OTU499	no	no	no	group_MarFL_vs_MarPA	3	0	4.14482	0.000663411	Actinobacteriota	Acidimicrobiia	Microtrichales	Ilumatobacteraceae	CL500-29_marine_group	Bacteria	Actinobacteriota	Acidimicrobiia	Microtrichales	Ilumatobacteraceae	CL500-29_marine_group	unclassified
OTU511	no	no	no	group_MarFL_vs_MarPA	3	0	3.85321	0.00294266	Actinobacteriota	Acidimicrobiia	Microtrichales	Ilumatobacteraceae	CL500-29_marine_group	Bacteria	Actinobacteriota	Acidimicrobiia	Microtrichales	Ilumatobacteraceae	CL500-29_marine_group	unclassified
OTU512	no	yes	no	group_MarFL_vs_MarPA	7	0	5.2832	1.80993e-08	Actinobacteriota	Acidimicrobiia	Microtrichales	Ilumatobacteraceae	CL500-29_marine_group	Bacteria	Actinobacteriota	Acidimicrobiia	Microtrichales	Ilumatobacteraceae	CL500-29_marine_group	unclassified
OTU517	no	yes	no	group_MarFL_vs_MarPA	6	0	4.6307	1.37306e-06	Actinobacteriota	Acidimicrobiia	Microtrichales	Ilumatobacteraceae	CL500-29_marine_group	Bacteria	Actinobacteriota	Acidimicrobiia	Microtrichales	Ilumatobacteraceae	CL500-29_marine_group	unclassified
OTU519	no	no	no	group_MarFL_vs_MarPA	3	0	4.0968	0.00035943	Actinobacteriota	Acidimicrobiia	Microtrichales	Ilumatobacteraceae	CL500-29_marine_group	Bacteria	Actinobacteriota	Acidimicrobiia	Microtrichales	Ilumatobacteraceae	CL500-29_marine_group	unclassified
OTU528	no	yes	no	group_MarFL_vs_MarPA	5	0	4.90554	2.96601e-07	Actinobacteriota	Acidimicrobiia	Microtrichales	Ilumatobacteraceae	CL500-29_marine_group	Bacteria	Actinobacteriota	Acidimicrobiia	Microtrichales	Ilumatobacteraceae	CL500-29_marine_group	unclassified
OTU529	no	yes	no	group_MarFL_vs_MarPA	4	0	4.34409	6.025e-05	Actinobacteriota	Acidimicrobiia	Microtrichales	Ilumatobacteraceae	CL500-29_marine_group	Bacteria	Actinobacteriota	Acidimicrobiia	Microtrichales	Ilumatobacteraceae	CL500-29_marine_group	unclassified
OTU537	no	yes	no	group_MarFL_vs_MarPA	4	0	4.41354	8.37203e-05	Actinobacteriota	Acidimicrobiia	Microtrichales	Ilumatobacteraceae	CL500-29_marine_group	Bacteria	Actinobacteriota	Acidimicrobiia	Microtrichales	Ilumatobacteraceae	CL500-29_marine_group	unclassified
OTU551	no	no	no	group_MarFL_vs_MarPA	4	0	3.80241	0.000619854	Actinobacteriota	Acidimicrobiia	Microtrichales	Ilumatobacteraceae	CL500-29_marine_group	Bacteria	Actinobacteriota	Acidimicrobiia	Microtrichales	Ilumatobacteraceae	CL500-29_marine_group	unclassified
OTU556	no	no	no	group_MarFL_vs_MarPA	5	0	4.6841	8.51861e-06	Actinobacteriota	Acidimicrobiia	Microtrichales	Ilumatobacteraceae	CL500-29_marine_group	Bacteria	Actinobacteriota	Acidimicrobiia	Microtrichales	Ilumatobacteraceae	CL500-29_marine_group	unclassified
OTU557	no	yes	no	group_MarFL_vs_MarPA	3	0	4.21584	0.000111877	Actinobacteriota	Acidimicrobiia	Microtrichales	Ilumatobacteraceae	CL500-29_marine_group	Bacteria	Actinobacteriota	Acidimicrobiia	Microtrichales	Ilumatobacteraceae	CL500-29_marine_group	unclassified
OTU561	no	yes	no	group_MarFL_vs_MarPA	2	0	3.74575	0.00218561	Actinobacteriota	Acidimicrobiia	Microtrichales	Ilumatobacteraceae	CL500-29_marine_group	Bacteria	Actinobacteriota	Acidimicrobiia	Microtrichales	Ilumatobacteraceae	CL500-29_marine_group	unclassified
OTU569	no	yes	no	group_MarFL_vs_MarPA	5	0	4.83328	2.31752e-06	Actinobacteriota	Acidimicrobiia	Microtrichales	Ilumatobacteraceae	CL500-29_marine_group	Bacteria	Actinobacteriota	Acidimicrobiia	Microtrichales	Ilumatobacteraceae	CL500-29_marine_group	unclassified
OTU574	no	no	no	group_MarFL_vs_MarPA	3	0	4.31257	0.000126331	Actinobacteriota	Acidimicrobiia	Microtrichales	Ilumatobacteraceae	CL500-29_marine_group	Bacteria	Actinobacteriota	Acidimicrobiia	Microtrichales	Ilumatobacteraceae	CL500-29_marine_group	unclassified
OTU582	no	yes	no	group_MarFL_vs_MarPA	2	0	3.46615	0.00427203	Actinobacteriota	Acidimicrobiia	Microtrichales	Ilumatobacteraceae	CL500-29_marine_group	Bacteria	Actinobacteriota	Acidimicrobiia	Microtrichales	Ilumatobacteraceae	CL500-29_marine_group	unclassified
OTU584	no	no	no	group_MarFL_vs_MarPA	7	0	5.23522	1.54702e-07	Actinobacteriota	Acidimicrobiia	Microtrichales	Ilumatobacteraceae	CL500-29_marine_group	Bacteria	Actinobacteriota	Acidimicrobiia	Microtrichales	Ilumatobacteraceae	CL500-29_marine_group	unclassified
OTU600	no	yes	no	group_MarFL_vs_MarPA	19	0	5.9749	7.19415e-12	Actinobacteriota	Acidimicrobiia	Microtrichales	Ilumatobacteraceae	CL500-29_marine_group	Bacteria	Actinobacteriota	Acidimicrobiia	Microtrichales	Ilumatobacteraceae	CL500-29_marine_group	unclassified
OTU609	no	no	no	group_MarFL_vs_MarPA	2	0	3.8243	0.00427203	Actinobacteriota	Acidimicrobiia	Microtrichales	Ilumatobacteraceae	CL500-29_marine_group	Bacteria	Actinobacteriota	Acidimicrobiia	Microtrichales	Ilumatobacteraceae	CL500-29_marine_group	unclassified
OTU621	no	yes	no	group_MarFL_vs_MarPA	2	0	3.58772	0.00416208	Actinobacteriota	Acidimicrobiia	Microtrichales	Ilumatobacteraceae	CL500-29_marine_group	Bacteria	Actinobacteriota	Acidimicrobiia	Microtrichales	Ilumatobacteraceae	CL500-29_marine_group	unclassified
OTU671	no	no	no	group_MarFL_vs_MarPA	2	0	3.66077	0.00294266	Actinobacteriota	Acidimicrobiia	Microtrichales	Ilumatobacteraceae	CL500-29_marine_group	Bacteria	Actinobacteriota	Acidimicrobiia	Microtrichales	Ilumatobacteraceae	CL500-29_marine_group	unclassified
OTU695	no	no	no	group_MarFL_vs_MarPA	4	0	4.47676	0.000303752	Actinobacteriota	Acidimicrobiia	Microtrichales	Ilumatobacteraceae	CL500-29_marine_group	Bacteria	Actinobacteriota	Acidimicrobiia	Microtrichales	Ilumatobacteraceae	CL500-29_marine_group	unclassified
OTU702	no	yes	no	group_MarFL_vs_MarPA	4	0	4.52544	1.11695e-05	Actinobacteriota	Acidimicrobiia	Microtrichales	Ilumatobacteraceae	CL500-29_marine_group	Bacteria	Actinobacteriota	Acidimicrobiia	Microtrichales	Ilumatobacteraceae	CL500-29_marine_group	unclassified
OTU728	no	yes	no	group_MarFL_vs_MarPA	3	0	4.23103	0.000247252	Actinobacteriota	Acidimicrobiia	Microtrichales	Ilumatobacteraceae	CL500-29_marine_group	Bacteria	Actinobacteriota	Acidimicrobiia	Microtrichales	Ilumatobacteraceae	CL500-29_marine_group	unclassified
OTU733	yes	yes	yes	group_MarFL_vs_MarPA	17	0	6.47253	1.87395e-13	Actinobacteriota	Acidimicrobiia	Microtrichales	Ilumatobacteraceae	CL500-29_marine_group	Bacteria	Actinobacteriota	Acidimicrobiia	Microtrichales	Ilumatobacteraceae	CL500-29_marine_group	unclassified
OTU736	no	yes	no	group_MarFL_vs_MarPA	3	0	4.1765	0.000128292	Actinobacteriota	Acidimicrobiia	Microtrichales	Ilumatobacteraceae	CL500-29_marine_group	Bacteria	Actinobacteriota	Acidimicrobiia	Microtrichales	Ilumatobacteraceae	CL500-29_marine_group	unclassified
OTU750	no	no	no	group_MarFL_vs_MarPA	2	0	3.52292	0.00737682	Actinobacteriota	Acidimicrobiia	Microtrichales	Ilumatobacteraceae	CL500-29_marine_group	Bacteria	Actinobacteriota	Acidimicrobiia	Microtrichales	Ilumatobacteraceae	CL500-29_marine_group	unclassified
OTU777	no	yes	no	group_MarFL_vs_MarPA	9	0	5.59639	1.79938e-09	Actinobacteriota	Acidimicrobiia	Microtrichales	Ilumatobacteraceae	CL500-29_marine_group	Bacteria	Actinobacteriota	Acidimicrobiia	Microtrichales	Ilumatobacteraceae	CL500-29_marine_group	unclassified
OTU799	no	no	no	group_MarFL_vs_MarPA	2	0	3.56917	0.00424808	Actinobacteriota	Acidimicrobiia	Microtrichales	Ilumatobacteraceae	CL500-29_marine_group	Bacteria	Actinobacteriota	Acidimicrobiia	Microtrichales	Ilumatobacteraceae	CL500-29_marine_group	unclassified
OTU801	no	no	no	group_MarFL_vs_MarPA	2	0	3.49297	0.00893899	Actinobacteriota	Acidimicrobiia	Microtrichales	Ilumatobacteraceae	CL500-29_marine_group	Bacteria	Actinobacteriota	Acidimicrobiia	Microtrichales	Ilumatobacteraceae	CL500-29_marine_group	unclassified
OTU834	no	no	no	group_MarFL_vs_MarPA	5	0	4.72281	4.49658e-05	Actinobacteriota	Acidimicrobiia	Microtrichales	Ilumatobacteraceae	CL500-29_marine_group	Bacteria	Actinobacteriota	Acidimicrobiia	Microtrichales	Ilumatobacteraceae	CL500-29_marine_group	unclassified
OTU858	no	no	no	group_MarFL_vs_MarPA	2	0	3.54822	0.00405048	Actinobacteriota	Acidimicrobiia	Microtrichales	Ilumatobacteraceae	CL500-29_marine_group	Bacteria	Actinobacteriota	Acidimicrobiia	Microtrichales	Ilumatobacteraceae	CL500-29_marine_group	unclassified
OTU903	no	yes	no	group_MarFL_vs_MarPA	7	0	5.26158	2.10239e-08	Actinobacteriota	Acidimicrobiia	Microtrichales	Ilumatobacteraceae	CL500-29_marine_group	Bacteria	Actinobacteriota	Acidimicrobiia	Microtrichales	Ilumatobacteraceae	CL500-29_marine_group	unclassified
OTU935	no	no	no	group_MarFL_vs_MarPA	2	0	3.77598	0.00283414	Actinobacteriota	Acidimicrobiia	Microtrichales	Ilumatobacteraceae	CL500-29_marine_group	Bacteria	Actinobacteriota	Acidimicrobiia	Microtrichales	Ilumatobacteraceae	CL500-29_marine_group	unclassified
OTU958	no	no	no	group_MarFL_vs_MarPA	3	0	4.08403	0.000414788	Actinobacteriota	Acidimicrobiia	Microtrichales	Ilumatobacteraceae	CL500-29_marine_group	Bacteria	Actinobacteriota	Acidimicrobiia	Microtrichales	Ilumatobacteraceae	CL500-29_marine_group	unclassified
OTU966	no	no	no	group_MarFL_vs_MarPA	2	0	3.41189	0.00321634	Actinobacteriota	Acidimicrobiia	Microtrichales	Ilumatobacteraceae	CL500-29_marine_group	Bacteria	Actinobacteriota	Acidimicrobiia	Microtrichales	Ilumatobacteraceae	CL500-29_marine_group	unclassified
OTU1012	no	no	no	group_MarFL_vs_MarPA	2	0	3.80193	0.00246399	Actinobacteriota	Acidimicrobiia	Microtrichales	Ilumatobacteraceae	CL500-29_marine_group	Bacteria	Actinobacteriota	Acidimicrobiia	Microtrichales	Ilumatobacteraceae	CL500-29_marine_group	unclassified
OTU1017	no	yes	no	group_MarFL_vs_MarPA	2	0	3.69761	0.00293701	Actinobacteriota	Acidimicrobiia	Microtrichales	Ilumatobacteraceae	CL500-29_marine_group	Bacteria	Actinobacteriota	Acidimicrobiia	Microtrichales	Ilumatobacteraceae	CL500-29_marine_group	unclassified
OTU1019	no	no	no	group_MarFL_vs_MarPA	5	0	4.45579	6.58085e-06	Actinobacteriota	Acidimicrobiia	Microtrichales	Ilumatobacteraceae	CL500-29_marine_group	Bacteria	Actinobacteriota	Acidimicrobiia	Microtrichales	Ilumatobacteraceae	CL500-29_marine_group	unclassified
OTU1074	no	no	no	group_MarFL_vs_MarPA	4	0	3.6719	0.00126788	Actinobacteriota	Acidimicrobiia	Microtrichales	Ilumatobacteraceae	CL500-29_marine_group	Bacteria	Actinobacteriota	Acidimicrobiia	Microtrichales	Ilumatobacteraceae	CL500-29_marine_group	unclassified
OTU1075	no	no	no	group_MarFL_vs_MarPA	5	0	4.83998	4.32171e-06	Actinobacteriota	Acidimicrobiia	Microtrichales	Ilumatobacteraceae	CL500-29_marine_group	Bacteria	Actinobacteriota	Acidimicrobiia	Microtrichales	Ilumatobacteraceae	CL500-29_marine_group	unclassified
OTU1103	no	no	no	group_MarFL_vs_MarPA	4	0	4.33819	8.85113e-05	Actinobacteriota	Acidimicrobiia	Microtrichales	Ilumatobacteraceae	CL500-29_marine_group	Bacteria	Actinobacteriota	Acidimicrobiia	Microtrichales	Ilumatobacteraceae	CL500-29_marine_group	unclassified
OTU1123	no	no	no	group_MarFL_vs_MarPA	4	0	4.33344	5.98752e-05	Actinobacteriota	Acidimicrobiia	Microtrichales	Ilumatobacteraceae	CL500-29_marine_group	Bacteria	Actinobacteriota	Acidimicrobiia	Microtrichales	Ilumatobacteraceae	CL500-29_marine_group	unclassified
OTU1148	no	yes	no	group_MarFL_vs_MarPA	5	0	4.80755	1.57575e-06	Actinobacteriota	Acidimicrobiia	Microtrichales	Ilumatobacteraceae	CL500-29_marine_group	Bacteria	Actinobacteriota	Acidimicrobiia	Microtrichales	Ilumatobacteraceae	CL500-29_marine_group	unclassified
OTU1210	yes	yes	yes	group_MarFL_vs_MarPA	16	0	5.44729	3.55101e-10	Actinobacteriota	Acidimicrobiia	Microtrichales	Ilumatobacteraceae	CL500-29_marine_group	Bacteria	Actinobacteriota	Acidimicrobiia	Microtrichales	Ilumatobacteraceae	CL500-29_marine_group	unclassified
OTU1211	no	no	no	group_MarFL_vs_MarPA	3	0	3.96777	0.00131238	Actinobacteriota	Acidimicrobiia	Microtrichales	Ilumatobacteraceae	CL500-29_marine_group	Bacteria	Actinobacteriota	Acidimicrobiia	Microtrichales	Ilumatobacteraceae	CL500-29_marine_group	unclassified
OTU1262	no	no	no	group_MarFL_vs_MarPA	3	0	3.97074	0.000467055	Actinobacteriota	Acidimicrobiia	Microtrichales	Ilumatobacteraceae	CL500-29_marine_group	Bacteria	Actinobacteriota	Acidimicrobiia	Microtrichales	Ilumatobacteraceae	CL500-29_marine_group	unclassified
OTU1312	no	no	no	group_MarFL_vs_MarPA	2	0	3.58965	0.00206709	Actinobacteriota	Acidimicrobiia	Microtrichales	Ilumatobacteraceae	CL500-29_marine_group	Bacteria	Actinobacteriota	Acidimicrobiia	Microtrichales	Ilumatobacteraceae	CL500-29_marine_group	unclassified
OTU1471	no	yes	no	group_MarFL_vs_MarPA	3	0	4.0104	0.000545564	Actinobacteriota	Acidimicrobiia	Microtrichales	Ilumatobacteraceae	CL500-29_marine_group	Bacteria	Actinobacteriota	Acidimicrobiia	Microtrichales	Ilumatobacteraceae	CL500-29_marine_group	unclassified
OTU1498	no	no	no	group_MarFL_vs_MarPA	4	0	4.58242	5.09171e-05	Actinobacteriota	Acidimicrobiia	Microtrichales	Ilumatobacteraceae	CL500-29_marine_group	Bacteria	Actinobacteriota	Acidimicrobiia	Microtrichales	Ilumatobacteraceae	CL500-29_marine_group	unclassified
OTU1579	no	no	no	group_MarFL_vs_MarPA	4	0	4.3375	8.94592e-05	Actinobacteriota	Acidimicrobiia	Microtrichales	Ilumatobacteraceae	CL500-29_marine_group	Bacteria	Actinobacteriota	Acidimicrobiia	Microtrichales	Ilumatobacteraceae	CL500-29_marine_group	unclassified
OTU1591	no	no	no	group_MarFL_vs_MarPA	2	0	3.81922	0.0015706	Actinobacteriota	Acidimicrobiia	Microtrichales	Ilumatobacteraceae	CL500-29_marine_group	Bacteria	Actinobacteriota	Acidimicrobiia	Microtrichales	Ilumatobacteraceae	CL500-29_marine_group	unclassified
OTU1785	no	yes	no	group_MarFL_vs_MarPA	3	0	4.00902	0.000208728	Actinobacteriota	Acidimicrobiia	Microtrichales	Ilumatobacteraceae	CL500-29_marine_group	Bacteria	Actinobacteriota	Acidimicrobiia	Microtrichales	Ilumatobacteraceae	CL500-29_marine_group	unclassified
OTU1806	no	no	no	group_MarFL_vs_MarPA	2	0	3.74239	0.0019106	Actinobacteriota	Acidimicrobiia	Microtrichales	Ilumatobacteraceae	CL500-29_marine_group	Bacteria	Actinobacteriota	Acidimicrobiia	Microtrichales	Ilumatobacteraceae	CL500-29_marine_group	unclassified
OTU1885	no	yes	no	group_MarFL_vs_MarPA	5	0	4.51582	3.33839e-06	Actinobacteriota	Acidimicrobiia	Microtrichales	Ilumatobacteraceae	CL500-29_marine_group	Bacteria	Actinobacteriota	Acidimicrobiia	Microtrichales	Ilumatobacteraceae	CL500-29_marine_group	unclassified
OTU1899	no	no	no	group_MarFL_vs_MarPA	3	0	3.36564	0.00851944	Actinobacteriota	Acidimicrobiia	Microtrichales	Ilumatobacteraceae	CL500-29_marine_group	Bacteria	Actinobacteriota	Acidimicrobiia	Microtrichales	Ilumatobacteraceae	CL500-29_marine_group	unclassified
OTU1900	no	no	no	group_MarFL_vs_MarPA	2	0	3.48456	0.00659997	Actinobacteriota	Acidimicrobiia	Microtrichales	Ilumatobacteraceae	CL500-29_marine_group	Bacteria	Actinobacteriota	Acidimicrobiia	Microtrichales	Ilumatobacteraceae	CL500-29_marine_group	unclassified
OTU2065	no	yes	no	group_MarFL_vs_MarPA	4	0	4.39461	4.0407e-05	Actinobacteriota	Acidimicrobiia	Microtrichales	Ilumatobacteraceae	CL500-29_marine_group	Bacteria	Actinobacteriota	Acidimicrobiia	Microtrichales	Ilumatobacteraceae	CL500-29_marine_group	unclassified
OTU2141	no	no	no	group_MarFL_vs_MarPA	3	0	3.45128	0.00890926	Actinobacteriota	Acidimicrobiia	Microtrichales	Ilumatobacteraceae	CL500-29_marine_group	Bacteria	Actinobacteriota	Acidimicrobiia	Microtrichales	Ilumatobacteraceae	CL500-29_marine_group	unclassified
OTU2400	no	no	no	group_MarFL_vs_MarPA	2	0	3.55964	0.00382428	Actinobacteriota	Acidimicrobiia	Microtrichales	Ilumatobacteraceae	CL500-29_marine_group	Bacteria	Actinobacteriota	Acidimicrobiia	Microtrichales	Ilumatobacteraceae	CL500-29_marine_group	unclassified
OTU2410	no	yes	no	group_MarFL_vs_MarPA	12	0	5.36036	4.46921e-09	Actinobacteriota	Acidimicrobiia	Microtrichales	Ilumatobacteraceae	CL500-29_marine_group	Bacteria	Actinobacteriota	Acidimicrobiia	Microtrichales	Ilumatobacteraceae	CL500-29_marine_group	unclassified
OTU2563	no	no	no	group_MarFL_vs_MarPA	3	0	4.23367	9.72927e-05	Actinobacteriota	Acidimicrobiia	Microtrichales	Ilumatobacteraceae	CL500-29_marine_group	Bacteria	Actinobacteriota	Acidimicrobiia	Microtrichales	Ilumatobacteraceae	CL500-29_marine_group	unclassified
OTU2961	no	no	no	group_MarFL_vs_MarPA	2	0	3.52261	0.00888703	Actinobacteriota	Acidimicrobiia	Microtrichales	Ilumatobacteraceae	CL500-29_marine_group	Bacteria	Actinobacteriota	Acidimicrobiia	Microtrichales	Ilumatobacteraceae	CL500-29_marine_group	unclassified
OTU2962	no	no	no	group_MarFL_vs_MarPA	2	0	3.74167	0.00175807	Actinobacteriota	Acidimicrobiia	Microtrichales	Ilumatobacteraceae	CL500-29_marine_group	Bacteria	Actinobacteriota	Acidimicrobiia	Microtrichales	Ilumatobacteraceae	CL500-29_marine_group	unclassified
OTU3297	no	yes	no	group_MarFL_vs_MarPA	2	0	3.44345	0.00500167	Actinobacteriota	Acidimicrobiia	Microtrichales	Ilumatobacteraceae	CL500-29_marine_group	Bacteria	Actinobacteriota	Acidimicrobiia	Microtrichales	Ilumatobacteraceae	CL500-29_marine_group	unclassified
OTU3791	no	yes	no	group_MarFL_vs_MarPA	2	0	3.5527	0.00427203	Actinobacteriota	Acidimicrobiia	Microtrichales	Ilumatobacteraceae	CL500-29_marine_group	Bacteria	Actinobacteriota	Acidimicrobiia	Microtrichales	Ilumatobacteraceae	CL500-29_marine_group	unclassified
OTU4386	no	yes	no	group_MarFL_vs_MarPA	15	0	6.26301	1.4992e-12	Actinobacteriota	Acidimicrobiia	Microtrichales	Ilumatobacteraceae	CL500-29_marine_group	Bacteria	Actinobacteriota	Acidimicrobiia	Microtrichales	Ilumatobacteraceae	CL500-29_marine_group	unclassified
OTU4585	no	yes	no	group_MarFL_vs_MarPA	5	0	4.7276	2.46862e-06	Actinobacteriota	Acidimicrobiia	Microtrichales	Ilumatobacteraceae	CL500-29_marine_group	Bacteria	Actinobacteriota	Acidimicrobiia	Microtrichales	Ilumatobacteraceae	CL500-29_marine_group	unclassified
OTU4621	no	no	no	group_MarFL_vs_MarPA	3	0	3.78561	0.00310974	Actinobacteriota	Acidimicrobiia	Microtrichales	Ilumatobacteraceae	CL500-29_marine_group	Bacteria	Actinobacteriota	Acidimicrobiia	Microtrichales	Ilumatobacteraceae	CL500-29_marine_group	unclassified
OTU4750	no	no	no	group_MarFL_vs_MarPA	3	0	4.11345	0.00033037	Actinobacteriota	Acidimicrobiia	Microtrichales	Ilumatobacteraceae	CL500-29_marine_group	Bacteria	Actinobacteriota	Acidimicrobiia	Microtrichales	Ilumatobacteraceae	CL500-29_marine_group	unclassified
OTU4757	no	no	no	group_MarFL_vs_MarPA	2	0	3.73021	0.0059302	Actinobacteriota	Acidimicrobiia	Microtrichales	Ilumatobacteraceae	CL500-29_marine_group	Bacteria	Actinobacteriota	Acidimicrobiia	Microtrichales	Ilumatobacteraceae	CL500-29_marine_group	unclassified
OTU4760	no	no	no	group_MarFL_vs_MarPA	2	0	3.5118	0.00427203	Actinobacteriota	Acidimicrobiia	Microtrichales	Ilumatobacteraceae	CL500-29_marine_group	Bacteria	Actinobacteriota	Acidimicrobiia	Microtrichales	Ilumatobacteraceae	CL500-29_marine_group	unclassified
OTU1098	no	no	no	group_MarFL_vs_MarPA	6	0	4.77469	1.5959e-05	Actinobacteriota	Acidimicrobiia	Microtrichales	Ilumatobacteraceae	Ilumatobacteraceae_unclassified	Bacteria	Actinobacteriota	Acidimicrobiia	Microtrichales	Ilumatobacteraceae	unclassified	unclassified
OTU49	yes	yes	yes	group_MarFL_vs_MarPA	0	63	-6.04081	1.30979e-14	Actinobacteriota	Acidimicrobiia	Microtrichales	Microtrichaceae	IMCC26207	Bacteria	Actinobacteriota	Acidimicrobiia	Microtrichales	Microtrichaceae	IMCC26207	unclassified
OTU122	no	no	no	group_MarFL_vs_MarPA	13	2	2.15295	0.00952473	Actinobacteriota	Acidimicrobiia	Microtrichales	uncultured	uncultured_ge	Bacteria	Actinobacteriota	Acidimicrobiia	Microtrichales	acIV	acIV-D	Iamia
OTU165	no	yes	no	group_MarFL_vs_MarPA	0	6	-4.90723	4.64758e-06	Actinobacteriota	Acidimicrobiia	Microtrichales	uncultured	uncultured_ge	Bacteria	Actinobacteriota	Acidimicrobiia	Microtrichales	unclassified	unclassified	unclassified
OTU45	yes	yes	yes	group_MarFL_vs_MarPA	67	5	3.71264	2.61953e-10	Actinobacteriota	Actinobacteria	Actinobacteria_unclassified	Actinobacteria_unclassified	Actinobacteria_unclassified	Bacteria	Actinobacteriota	Actinobacteria	Frankiales	acSTL	acSTL-A	acSTL-A1
OTU19	yes	yes	yes	group_MarFL_vs_MarPA	21	1	4.10107	1.75193e-05	Actinobacteriota	Actinobacteria	Frankiales	Sporichthyaceae	hgcI_clade	Bacteria	Actinobacteriota	Actinobacteria	Frankiales	acI	acI-B	acI-B1
OTU65	yes	yes	yes	group_MarFL_vs_MarPA	78	0	6.75574	2.8296e-15	Actinobacteriota	Actinobacteria	Frankiales	Sporichthyaceae	hgcI_clade	Bacteria	Actinobacteriota	Actinobacteria	Frankiales	acI	acI-A	acI-A5
OTU78	yes	yes	yes	group_MarFL_vs_MarPA	39	0	5.75884	1.11818e-11	Actinobacteriota	Actinobacteria	Frankiales	Sporichthyaceae	hgcI_clade	Bacteria	Actinobacteriota	Actinobacteria	Frankiales	acI	acI-C	acI-C1
OTU86	yes	yes	yes	group_MarFL_vs_MarPA	15	0	4.98265	7.88227e-07	Actinobacteriota	Actinobacteria	Frankiales	Sporichthyaceae	hgcI_clade	Bacteria	Actinobacteriota	Actinobacteria	Frankiales	acI	acI-A	acI-A4
OTU200	no	yes	no	group_MarFL_vs_MarPA	6	0	5.04972	7.40476e-08	Actinobacteriota	Actinobacteria	Frankiales	Sporichthyaceae	hgcI_clade	Bacteria	Actinobacteriota	Actinobacteria	Frankiales	acI	acI-C	unclassified
OTU1393	no	yes	no	group_MarFL_vs_MarPA	3	0	4.20434	0.000136436	Actinobacteriota	Actinobacteria	Frankiales	Sporichthyaceae	hgcI_clade	Bacteria	Actinobacteriota	Actinobacteria	Frankiales	Sporichthyaceae	hgcI_clade	unclassified
OTU356	no	yes	no	group_MarFL_vs_MarPA	5	0	3.30376	0.0013994	Actinobacteriota	Actinobacteria	Frankiales	Sporichthyaceae	Sporichthyaceae_ge	Bacteria	Actinobacteriota	Actinobacteria	Frankiales	Sporichthyaceae	unclassified	unclassified
OTU611	no	yes	no	group_MarFL_vs_MarPA	4	0	4.37875	6.18472e-05	Actinobacteriota	Actinobacteria	Frankiales	Sporichthyaceae	Sporichthyaceae_ge	Bacteria	Actinobacteriota	Actinobacteria	Frankiales	Sporichthyaceae	unclassified	unclassified
OTU2764	no	no	no	group_MarFL_vs_MarPA	2	0	3.45799	0.00922164	Actinobacteriota	Actinobacteria	Frankiales	Sporichthyaceae	Sporichthyaceae_ge	Bacteria	Actinobacteriota	Actinobacteria	Frankiales	Sporichthyaceae	unclassified	unclassified
OTU3	yes	yes	yes	group_MarFL_vs_MarPA	225	4	5.74026	4.57662e-19	Actinobacteriota	Actinobacteria	Frankiales	Sporichthyaceae	Sporichthyaceae_unclassified	Bacteria	Actinobacteriota	Actinobacteria	Frankiales	acI	acI-A	acI-A7
OTU93	yes	yes	yes	group_MarFL_vs_MarPA	11	0	5.21932	3.40721e-08	Actinobacteriota	Actinobacteria	Frankiales	Sporichthyaceae	Sporichthyaceae_unclassified	Bacteria	Actinobacteriota	Actinobacteria	Frankiales	acI	acI-A	acI-A1
OTU197	no	yes	no	group_MarFL_vs_MarPA	11	0	4.22741	9.38148e-06	Actinobacteriota	Actinobacteria	Frankiales	Sporichthyaceae	Sporichthyaceae_unclassified	Bacteria	Actinobacteriota	Actinobacteria	Frankiales	Sporichthyaceae	unclassified	unclassified
OTU266	no	yes	no	group_MarFL_vs_MarPA	10	0	5.34134	4.05978e-08	Actinobacteriota	Actinobacteria	Frankiales	Sporichthyaceae	Sporichthyaceae_unclassified	Bacteria	Actinobacteriota	Actinobacteria	Frankiales	Sporichthyaceae	Candidatus_Planktophila	unclassified
OTU345	yes	yes	yes	group_MarFL_vs_MarPA	13	0	4.85921	1.05636e-07	Actinobacteriota	Actinobacteria	Frankiales	Sporichthyaceae	Sporichthyaceae_unclassified	Bacteria	Actinobacteriota	Actinobacteria	Frankiales	acI	acI-A	unclassified
OTU840	no	yes	no	group_MarFL_vs_MarPA	3	0	4.34844	2.19359e-05	Actinobacteriota	Actinobacteria	Frankiales	Sporichthyaceae	Sporichthyaceae_unclassified	Bacteria	Actinobacteriota	Actinobacteria	Frankiales	Sporichthyaceae	unclassified	unclassified
OTU984	yes	yes	yes	group_MarFL_vs_MarPA	15	0	6.24244	8.49834e-12	Actinobacteriota	Actinobacteria	Frankiales	Sporichthyaceae	Sporichthyaceae_unclassified	Bacteria	Actinobacteriota	Actinobacteria	Frankiales	Sporichthyaceae	hgcI_clade	unclassified
OTU994	no	yes	no	group_MarFL_vs_MarPA	7	0	5.25149	2.05469e-07	Actinobacteriota	Actinobacteria	Frankiales	Sporichthyaceae	Sporichthyaceae_unclassified	Bacteria	Actinobacteriota	Actinobacteria	Frankiales	Sporichthyaceae	unclassified	unclassified
OTU2171	no	yes	no	group_MarFL_vs_MarPA	2	0	3.36244	0.00731545	Actinobacteriota	Actinobacteria	Frankiales	Sporichthyaceae	Sporichthyaceae_unclassified	Bacteria	Actinobacteriota	Actinobacteria	Frankiales	Sporichthyaceae	hgcI_clade	unclassified
OTU162	no	yes	no	group_MarFL_vs_MarPA	0	3	-3.7562	0.00416208	Actinobacteriota	Actinobacteria	Propionibacteriales	Propionibacteriaceae	Cutibacterium	Bacteria	Actinobacteriota	Actinobacteria	Propionibacteriales	Propionibacteriaceae	Cutibacterium	unclassified
OTU103	yes	no	no	group_MarFL_vs_MarPA	14	1	3.47073	0.000121633	Actinobacteriota	Thermoleophilia	Gaiellales	uncultured	uncultured_ge	Bacteria	Actinobacteriota	Thermoleophilia	Gaiellales	unclassified	unclassified	unclassified
OTU232	no	no	no	group_MarFL_vs_MarPA	1	17	-3.43989	0.00294074	Bacteria_unclassified	Bacteria_unclassified	Bacteria_unclassified	Bacteria_unclassified	Bacteria_unclassified	Bacteria	unclassified	unclassified	unclassified	unclassified	unclassified	unclassified
OTU87	yes	no	no	group_MarFL_vs_MarPA	45	6	2.71941	0.000119054	Bacteroidota	Bacteroidia	Chitinophagales	Chitinophagaceae	Ferruginibacter	Bacteria	Bacteroidota	Bacteroidia	Chitinophagales	Chitinophagaceae	Ferruginibacter	unclassified
OTU53	yes	no	no	group_MarFL_vs_MarPA	31	2	3.9652	1.34008e-05	Bacteroidota	Bacteroidia	Chitinophagales	Chitinophagaceae	Sediminibacterium	Bacteria	Bacteroidota	Bacteroidia	Chitinophagales	bacI	bacI-A	bacI-A1
OTU3183	no	no	no	group_MarFL_vs_MarPA	3	0	3.97217	0.00455275	Bacteroidota	Bacteroidia	Chitinophagales	Chitinophagaceae	Sediminibacterium	Bacteria	Bacteroidota	Bacteroidia	Chitinophagales	bacI	bacI-A	bacI-A1
OTU237	no	no	no	group_MarFL_vs_MarPA	0	10	-5.1612	4.12449e-05	Bacteroidota	Bacteroidia	Chitinophagales	Saprospiraceae	uncultured	Bacteria	Bacteroidota	Bacteroidia	Chitinophagales	Saprospiraceae	unclassified	unclassified
OTU99	no	no	no	group_MarFL_vs_MarPA	4	0	4.37023	0.000107726	Bacteroidota	Bacteroidia	Cytophagales	Cyclobacteriaceae	Algoriphagus	Bacteria	Bacteroidota	Bacteroidia	Cytophagales	bacIII	bacIII-B	Algor
OTU37	yes	no	no	group_MarFL_vs_MarPA	71	2	4.88581	4.46921e-09	Bacteroidota	Bacteroidia	Cytophagales	Spirosomaceae	Pseudarcicella	Bacteria	Bacteroidota	Bacteroidia	Cytophagales	bacIII	bacIII-A	unclassified
OTU31	yes	no	no	group_MarFL_vs_MarPA	408	69	2.55974	0.000745519	Bacteroidota	Bacteroidia	Flavobacteriales	Crocinitomicaceae	Fluviicola	Bacteria	Bacteroidota	Bacteroidia	Flavobacteriales	bacV	unclassified	unclassified
OTU260	no	no	no	group_MarFL_vs_MarPA	10	0	5.05634	1.11088e-05	Bacteroidota	Bacteroidia	Flavobacteriales	Crocinitomicaceae	Fluviicola	Bacteria	Bacteroidota	Bacteroidia	Flavobacteriales	Crocinitomicaceae	Fluviicola	unclassified
OTU2998	no	no	no	group_MarFL_vs_MarPA	10	0	4.40275	6.37895e-05	Bacteroidota	Bacteroidia	Flavobacteriales	Crocinitomicaceae	Fluviicola	Bacteria	Bacteroidota	Bacteroidia	Flavobacteriales	Crocinitomicaceae	Fluviicola	unclassified
OTU23	yes	no	no	group_MarFL_vs_MarPA	115	20	2.46439	0.00311567	Bacteroidota	Bacteroidia	Flavobacteriales	Flavobacteriaceae	Flavobacterium	Bacteria	Bacteroidota	Bacteroidia	Flavobacteriales	bacII	bacII-A	Flavo-A1
OTU34	yes	no	no	group_MarFL_vs_MarPA	231	22	3.3643	4.71561e-06	Bacteroidota	Bacteroidia	Flavobacteriales	Flavobacteriaceae	Flavobacterium	Bacteria	Bacteroidota	Bacteroidia	Flavobacteriales	bacII	bacII-A	unclassified
OTU145	no	no	no	group_MarFL_vs_MarPA	11	1	2.81738	0.00203953	Bacteroidota	Bacteroidia	Flavobacteriales	Flavobacteriaceae	Flavobacterium	Bacteria	Bacteroidota	Bacteroidia	Flavobacteriales	Flavobacteriaceae	Flavobacterium	unclassified
OTU286	no	no	no	group_MarFL_vs_MarPA	8	0	4.02566	0.00281511	Bacteroidota	Bacteroidia	Flavobacteriales	Flavobacteriaceae	Flavobacterium	Bacteria	Bacteroidota	Bacteroidia	Flavobacteriales	Flavobacteriaceae	Flavobacterium	unclassified
OTU396	no	no	no	group_MarFL_vs_MarPA	3	0	3.99295	0.00206709	Bacteroidota	Bacteroidia	Flavobacteriales	Flavobacteriaceae	Flavobacterium	Bacteria	Bacteroidota	Bacteroidia	Flavobacteriales	Flavobacteriaceae	Flavobacterium	unclassified
OTU437	yes	no	no	group_MarFL_vs_MarPA	24	1	4.56621	0.000619407	Bacteroidota	Bacteroidia	Flavobacteriales	Flavobacteriaceae	Flavobacterium	Bacteria	Bacteroidota	Bacteroidia	Flavobacteriales	Flavobacteriaceae	Flavobacterium	unclassified
OTU646	no	no	no	group_MarFL_vs_MarPA	3	0	3.65628	0.00573613	Bacteroidota	Bacteroidia	Flavobacteriales	Flavobacteriaceae	Flavobacterium	Bacteria	Bacteroidota	Bacteroidia	Flavobacteriales	Flavobacteriaceae	Flavobacterium	unclassified
OTU928	no	no	no	group_MarFL_vs_MarPA	2	0	3.8621	0.00952473	Bacteroidota	Bacteroidia	Flavobacteriales	Flavobacteriaceae	Flavobacterium	Bacteria	Bacteroidota	Bacteroidia	Flavobacteriales	Flavobacteriaceae	Flavobacterium	unclassified
OTU1029	yes	no	no	group_MarFL_vs_MarPA	26	2	3.70825	0.000106599	Bacteroidota	Bacteroidia	Flavobacteriales	Flavobacteriaceae	Flavobacterium	Bacteria	Bacteroidota	Bacteroidia	Flavobacteriales	Flavobacteriaceae	Flavobacterium	unclassified
OTU1311	no	no	no	group_MarFL_vs_MarPA	5	0	4.8037	1.92563e-05	Bacteroidota	Bacteroidia	Flavobacteriales	Flavobacteriaceae	Flavobacterium	Bacteria	Bacteroidota	Bacteroidia	Flavobacteriales	Flavobacteriaceae	Flavobacterium	unclassified
OTU1342	no	no	no	group_MarFL_vs_MarPA	6	0	4.47014	0.000198538	Bacteroidota	Bacteroidia	Flavobacteriales	Flavobacteriaceae	Flavobacterium	Bacteria	Bacteroidota	Bacteroidia	Flavobacteriales	Flavobacteriaceae	Flavobacterium	unclassified
OTU1461	no	no	no	group_MarFL_vs_MarPA	2	0	3.71321	0.00342932	Bacteroidota	Bacteroidia	Flavobacteriales	Flavobacteriaceae	Flavobacterium	Bacteria	Bacteroidota	Bacteroidia	Flavobacteriales	Flavobacteriaceae	Flavobacterium	unclassified
OTU3159	no	no	no	group_MarFL_vs_MarPA	9	0	4.84461	0.00010997	Bacteroidota	Bacteroidia	Flavobacteriales	Flavobacteriaceae	Flavobacterium	Bacteria	Bacteroidota	Bacteroidia	Flavobacteriales	Flavobacteriaceae	Flavobacterium	unclassified
OTU104	yes	no	no	group_MarFL_vs_MarPA	7	1	2.89077	0.00683525	Bacteroidota	Bacteroidia	Sphingobacteriales	env.OPS_17	env.OPS_17_ge	Bacteria	Bacteroidota	Bacteroidia	Sphingobacteriales	env.OPS_17	unclassified	unclassified
OTU137	no	no	no	group_MarFL_vs_MarPA	7	0	4.24084	0.000313926	Bacteroidota	Bacteroidia	Sphingobacteriales	NS11-12_marine_group	NS11-12_marine_group_ge	Bacteria	Bacteroidota	Bacteroidia	Sphingobacteriales	NS11-12_marine_group	unclassified	unclassified
OTU50	yes	no	no	group_MarFL_vs_MarPA	100	16	2.57636	6.95677e-06	Bacteroidota	Kapabacteria	Kapabacteriales	Kapabacteriales_fa	Kapabacteriales_ge	Bacteria	Bacteroidota	Kapabacteria	Kapabacteriales	unclassified	unclassified	unclassified
OTU4	yes	yes	yes	group_MarFL_vs_MarPA	3	0	3.81262	0.00521033	Crenarchaeota	Nitrososphaeria	Nitrosopumilales	Nitrosopumilaceae	Nitrosopumilaceae_unclassified	Archaea	Crenarchaeota	Nitrososphaeria	Nitrosopumilales	Nitrosopumilaceae	unclassified	unclassified
OTU11	yes	yes	yes	group_MarFL_vs_MarPA	295	1288	-2.12288	0.00427203	Cyanobacteria	Cyanobacteriia	Synechococcales	Cyanobiaceae	Cyanobium_PCC-6307	Bacteria	Cyanobacteria	Cyanobacteriia	Synechococcales	Cyanobiaceae	Cyanobium_PCC-6307	unclassified
OTU101	yes	yes	yes	group_MarFL_vs_MarPA	657	117	2.48514	0.000204267	Cyanobacteria	Cyanobacteriia	Synechococcales	Cyanobiaceae	Cyanobium_PCC-6307	Bacteria	Cyanobacteria	Cyanobacteriia	Synechococcales	Cyanobiaceae	Cyanobium_PCC-6307	unclassified
OTU174	no	yes	no	group_MarFL_vs_MarPA	11	2	2.25631	0.00510089	Cyanobacteria	Cyanobacteriia	Synechococcales	Cyanobiaceae	Cyanobium_PCC-6307	Bacteria	Cyanobacteria	Cyanobacteriia	Synechococcales	Cyanobiaceae	Cyanobium_PCC-6307	unclassified
OTU188	yes	yes	yes	group_MarFL_vs_MarPA	64	2	4.46919	6.53899e-08	Cyanobacteria	Cyanobacteriia	Synechococcales	Cyanobiaceae	Cyanobium_PCC-6307	Bacteria	Cyanobacteria	Cyanobacteriia	Synechococcales	Cyanobiaceae	Cyanobium_PCC-6307	unclassified
OTU372	yes	yes	yes	group_MarFL_vs_MarPA	93	16	2.4852	0.00212385	Cyanobacteria	Cyanobacteriia	Synechococcales	Cyanobiaceae	Cyanobium_PCC-6307	Bacteria	Cyanobacteria	Cyanobacteriia	Synechococcales	Cyanobiaceae	Cyanobium_PCC-6307	unclassified
OTU652	no	no	no	group_MarFL_vs_MarPA	9	0	4.33854	0.000133595	Cyanobacteria	Cyanobacteriia	Synechococcales	Cyanobiaceae	Cyanobium_PCC-6307	Bacteria	Cyanobacteria	Cyanobacteriia	Synechococcales	Cyanobiaceae	Cyanobium_PCC-6307	unclassified
OTU765	no	yes	no	group_MarFL_vs_MarPA	20	1	4.26628	7.27484e-08	Cyanobacteria	Cyanobacteriia	Synechococcales	Cyanobiaceae	Cyanobium_PCC-6307	Bacteria	Cyanobacteria	Cyanobacteriia	Synechococcales	Cyanobiaceae	Cyanobium_PCC-6307	unclassified
OTU788	no	no	no	group_MarFL_vs_MarPA	17	1	3.49754	8.94592e-05	Cyanobacteria	Cyanobacteriia	Synechococcales	Cyanobiaceae	Cyanobium_PCC-6307	Bacteria	Cyanobacteria	Cyanobacteriia	Synechococcales	Cyanobiaceae	Cyanobium_PCC-6307	unclassified
OTU1121	no	yes	no	group_MarFL_vs_MarPA	5	0	4.86193	2.09327e-06	Cyanobacteria	Cyanobacteriia	Synechococcales	Cyanobiaceae	Cyanobium_PCC-6307	Bacteria	Cyanobacteria	Cyanobacteriia	Synechococcales	Cyanobiaceae	Cyanobium_PCC-6307	unclassified
OTU1282	no	no	no	group_MarFL_vs_MarPA	10	0	4.2136	0.000619854	Cyanobacteria	Cyanobacteriia	Synechococcales	Cyanobiaceae	Cyanobium_PCC-6307	Bacteria	Cyanobacteria	Cyanobacteriia	Synechococcales	Cyanobiaceae	Cyanobium_PCC-6307	unclassified
OTU1364	no	no	no	group_MarFL_vs_MarPA	5	0	3.0156	0.00716918	Cyanobacteria	Cyanobacteriia	Synechococcales	Cyanobiaceae	Cyanobium_PCC-6307	Bacteria	Cyanobacteria	Cyanobacteriia	Synechococcales	Cyanobiaceae	Cyanobium_PCC-6307	unclassified
OTU4430	no	no	no	group_MarFL_vs_MarPA	3	0	4.2049	0.00389705	Cyanobacteria	Cyanobacteriia	Synechococcales	Cyanobiaceae	Cyanobium_PCC-6307	Bacteria	Cyanobacteria	Cyanobacteriia	Synechococcales	Cyanobiaceae	Cyanobium_PCC-6307	unclassified
OTU1241	no	no	no	group_MarFL_vs_MarPA	7	0	4.2761	0.00382392	Cyanobacteria	Cyanobacteriia	Synechococcales	Cyanobiaceae	Synechococcus_MBIC10613	Bacteria	Cyanobacteria	Cyanobacteriia	Synechococcales	Cyanobiaceae	Synechococcus_MBIC10613	unclassified
OTU221	no	no	no	group_MarFL_vs_MarPA	0	9	-4.80099	0.00922164	Firmicutes	Bacilli	Staphylococcales	Staphylococcaceae	Staphylococcus	Bacteria	Firmicutes	Bacilli	Staphylococcales	Staphylococcaceae	Staphylococcus	unclassified
OTU203	no	no	no	group_MarFL_vs_MarPA	0	7	-4.50413	6.7977e-05	Firmicutes	Clostridia	Clostridiales	Clostridiaceae	Clostridium_sensu_stricto_13	Bacteria	Firmicutes	Clostridia	Clostridiales	Clostridiaceae	Clostridium_sensu_stricto_13	unclassified
OTU212	no	no	no	group_MarFL_vs_MarPA	0	5	-3.54512	0.00175807	Patescibacteria	Saccharimonadia	Saccharimonadales	Saccharimonadales_unclassified	Saccharimonadales_unclassified	Bacteria	Patescibacteria	Saccharimonadia	Saccharimonadales	unclassified	unclassified	unclassified
OTU257	no	no	no	group_MarFL_vs_MarPA	0	6	-4.11836	0.00162327	Planctomycetota	Phycisphaerae	Phycisphaerales	Phycisphaeraceae	CL500-3	Bacteria	Planctomycetota	Phycisphaerae	Phycisphaerales	Phycisphaeraceae	CL500-3	unclassified
OTU314	no	no	no	group_MarFL_vs_MarPA	0	3	-3.76973	0.00788486	Planctomycetota	Phycisphaerae	Phycisphaerales	Phycisphaeraceae	CL500-3	Bacteria	Planctomycetota	Phycisphaerae	Phycisphaerales	Phycisphaeraceae	CL500-3	unclassified
OTU347	no	no	no	group_MarFL_vs_MarPA	0	3	-4.07167	0.00384773	Planctomycetota	Phycisphaerae	Phycisphaerales	Phycisphaeraceae	CL500-3	Bacteria	Planctomycetota	Phycisphaerae	Phycisphaerales	Phycisphaeraceae	CL500-3	unclassified
OTU214	no	no	no	group_MarFL_vs_MarPA	0	8	-4.93676	7.11719e-05	Planctomycetota	Phycisphaerae	Phycisphaerales	Phycisphaeraceae	Phycisphaeraceae_unclassified	Bacteria	Planctomycetota	Phycisphaerae	Phycisphaerales	Phycisphaeraceae	unclassified	unclassified
OTU133	yes	yes	yes	group_MarFL_vs_MarPA	0	7	-5.35327	1.48227e-07	Planctomycetota	Planctomycetes	Pirellulales	Pirellulaceae	Pirellula	Bacteria	Planctomycetota	Planctomycetes	Pirellulales	Pirellulaceae	Pirellula	unclassified
OTU126	no	no	no	group_MarFL_vs_MarPA	0	17	-5.66438	3.15733e-08	Planctomycetota	Planctomycetes	Pirellulales	Pirellulaceae	uncultured	Bacteria	Planctomycetota	Planctomycetes	Pirellulales	Pirellulaceae	unclassified	unclassified
OTU74	yes	yes	yes	group_MarFL_vs_MarPA	0	31	-5.85467	2.66693e-10	Planctomycetota	Planctomycetes	Planctomycetales	Rubinisphaeraceae	uncultured	Bacteria	Planctomycetota	Planctomycetes	Planctomycetales	Rubinisphaeraceae	unclassified	unclassified
OTU170	no	no	no	group_MarFL_vs_MarPA	0	2	-3.54129	0.00240468	Planctomycetota	Planctomycetes	Planctomycetales	Schlesneriaceae	Schlesneria	Bacteria	Planctomycetota	Planctomycetes	Planctomycetales	Schlesneriaceae	Schlesneria	unclassified
OTU52	yes	no	no	group_MarFL_vs_MarPA	0	43	-7.91267	5.98752e-05	Proteobacteria	Alphaproteobacteria	Paracaedibacterales	Paracaedibacteraceae	Candidatus_Finniella	Bacteria	Proteobacteria	Alphaproteobacteria	Paracaedibacterales	Paracaedibacteraceae	Candidatus_Finniella	unclassified
OTU68	yes	yes	yes	group_MarFL_vs_MarPA	0	35	-5.79655	5.08887e-10	Proteobacteria	Alphaproteobacteria	Paracaedibacterales	Paracaedibacteraceae	uncultured	Bacteria	Proteobacteria	Alphaproteobacteria	Paracaedibacterales	Paracaedibacteraceae	unclassified	unclassified
OTU132	no	no	no	group_MarFL_vs_MarPA	8	0	3.39146	0.000246611	Proteobacteria	Alphaproteobacteria	Rhizobiales	Beijerinckiaceae	Beijerinckiaceae_unclassified	Bacteria	Proteobacteria	Alphaproteobacteria	Rhizobiales	alfI	alfI-B	unclassified
OTU179	no	no	no	group_MarFL_vs_MarPA	0	12	-4.84388	0.00296463	Proteobacteria	Alphaproteobacteria	Rhizobiales	Beijerinckiaceae	Methylobacterium-Methylorubrum	Bacteria	Proteobacteria	Alphaproteobacteria	Rhizobiales	Beijerinckiaceae	Methylobacterium-Methylorubrum	unclassified
OTU280	no	no	no	group_MarFL_vs_MarPA	0	2	-3.87831	0.00561301	Proteobacteria	Alphaproteobacteria	Rhizobiales	Rhizobiales_Incertae_Sedis	uncultured	Bacteria	Proteobacteria	Alphaproteobacteria	Rhizobiales	alfVII	unclassified	unclassified
OTU112	no	yes	no	group_MarFL_vs_MarPA	3	0	3.78145	0.000434391	Proteobacteria	Alphaproteobacteria	Rhodobacterales	Rhodobacteraceae	Rhodobacter	Bacteria	Proteobacteria	Alphaproteobacteria	Rhodobacterales	alfVI	unclassified	unclassified
OTU2	yes	yes	yes	group_MarFL_vs_MarPA	9	0	3.9691	0.000845367	Proteobacteria	Alphaproteobacteria	SAR11_clade	Clade_III	Clade_III_ge	Bacteria	Proteobacteria	Alphaproteobacteria	SAR11_clade	alfV	alfV-A	LD12
OTU95	yes	no	no	group_MarFL_vs_MarPA	16	1	3.45271	1.73383e-05	Proteobacteria	Alphaproteobacteria	Sphingomonadales	Sphingomonadaceae	Sphingorhabdus	Bacteria	Proteobacteria	Alphaproteobacteria	Sphingomonadales	alfIV	alfIV-B	Pyxis
OTU612	no	yes	no	group_MarFL_vs_MarPA	27	1	4.45677	3.17972e-09	Proteobacteria	Gammaproteobacteria	Burkholderiales	Alcaligenaceae	GKS98_freshwater_group	Bacteria	Proteobacteria	Gammaproteobacteria	Burkholderiales	Alcaligenaceae	GKS98_freshwater_group	unclassified
OTU91	yes	yes	yes	group_MarFL_vs_MarPA	14	1	3.39218	9.38148e-06	Proteobacteria	Gammaproteobacteria	Burkholderiales	Burkholderiaceae	Polynucleobacter	Bacteria	Proteobacteria	Gammaproteobacteria	Burkholderiales	betII	Pnec	PnecB
OTU220	no	no	no	group_MarFL_vs_MarPA	4	0	4.22889	3.65336e-05	Proteobacteria	Gammaproteobacteria	Burkholderiales	Comamonadaceae	Comamonadaceae_unclassified	Bacteria	Proteobacteria	Gammaproteobacteria	Burkholderiales	Comamonadaceae	unclassified	unclassified
OTU3301	no	no	no	group_MarFL_vs_MarPA	4	0	3.78361	0.000518581	Proteobacteria	Gammaproteobacteria	Burkholderiales	Comamonadaceae	Comamonadaceae_unclassified	Bacteria	Proteobacteria	Gammaproteobacteria	Burkholderiales	Comamonadaceae	unclassified	unclassified
OTU43	yes	yes	yes	group_MarFL_vs_MarPA	39	1	5.04563	4.46921e-09	Proteobacteria	Gammaproteobacteria	Burkholderiales	Comamonadaceae	Limnohabitans	Bacteria	Proteobacteria	Gammaproteobacteria	Burkholderiales	betI	betI-A	Lhab-A1
OTU248	no	yes	no	group_MarFL_vs_MarPA	9	0	5.20868	1.23347e-07	Proteobacteria	Gammaproteobacteria	Burkholderiales	Comamonadaceae	Rhodoferax	Bacteria	Proteobacteria	Gammaproteobacteria	Burkholderiales	betI	betI-B	Rhodo
OTU30	yes	no	no	group_MarFL_vs_MarPA	11	0	3.78836	0.000177573	Proteobacteria	Gammaproteobacteria	Methylococcales	Methylomonadaceae	Crenothrix	Bacteria	Proteobacteria	Gammaproteobacteria	Methylococcales	Methylomonadaceae	Crenothrix	unclassified
OTU32	yes	no	no	group_MarFL_vs_MarPA	105	4	4.60525	2.21389e-07	Proteobacteria	Gammaproteobacteria	Methylococcales	Methylomonadaceae	uncultured	Bacteria	Proteobacteria	Gammaproteobacteria	Methylococcales	Methylomonadaceae	unclassified	unclassified
OTU24	yes	yes	yes	group_MarFL_vs_MarPA	318	2198	-2.78714	1.81404e-11	Verrucomicrobiota	Verrucomicrobiae	Verrucomicrobiales	Rubritaleaceae	Luteolibacter	Bacteria	Verrucomicrobiota	Verrucomicrobiae	Verrucomicrobiales	Rubritaleaceae	Luteolibacter	unclassified
OTU1494	no	no	no	group_MarFL_vs_MarPA	0	7	-4.38822	0.000518581	Verrucomicrobiota	Verrucomicrobiae	Verrucomicrobiales	Rubritaleaceae	Luteolibacter	Bacteria	Verrucomicrobiota	Verrucomicrobiae	Verrucomicrobiales	Rubritaleaceae	Luteolibacter	unclassified
OTU84	yes	yes	yes	group_MarFL_vs_MarPA	0	3	-4.07674	0.000458352	Verrucomicrobiota	Verrucomicrobiae	Verrucomicrobiales	Verrucomicrobiaceae	uncultured	Bacteria	Verrucomicrobiota	Verrucomicrobiae	Verrucomicrobiales	Verrucomicrobiaceae	unclassified	unclassified
Group and contrasts – a set of samples to be statistically tested for differential abundance; is_major – whether the OTU total relative abundance exceeds 0.1%; is_shared – whether OTU is differentially abundant between FL and PA across all three months; is_major_shared – both conditions are met; group1_mean/ group2_mean – mean normalized count of OTU for reference (first/ second) contrast (same f…

## Sheet: Jul
Table S4. Abundance of OTUs having significant differences between FL and PA communities in July
id	is_major	is_shared	is_major_shared	contrast	group1_mean	group2_mean	log2FoldChange	padj	slv_Phylum	slv_Class	slv_Order	slv_Family	slv_Genus	fw_kingdom	fw_phylum	fw_class	fw_order	fw_lineage	fw_clade	fw_tribe
OTU278	no	no	no	group_JulFL_vs_JulPA	6	0	4.42368	3.39862e-06	Acidobacteriota	Vicinamibacteria	Vicinamibacterales	Vicinamibacteraceae	Vicinamibacteraceae_ge	Bacteria	Acidobacteriota	Vicinamibacteria	Vicinamibacterales	Vicinamibacteraceae	unclassified	unclassified
OTU39	yes	no	no	group_JulFL_vs_JulPA	5	136	-4.74456	7.85457e-16	Actinobacteriota	Acidimicrobiia	IMCC26256	IMCC26256_fa	IMCC26256_ge	Bacteria	Actinobacteriota	Acidimicrobiia	IMCC26256	unclassified	unclassified	unclassified
OTU173	no	yes	no	group_JulFL_vs_JulPA	0	12	-5.62314	8.35552e-10	Actinobacteriota	Acidimicrobiia	Microtrichales	Iamiaceae	Iamia	Bacteria	Actinobacteriota	Acidimicrobiia	Microtrichales	Iamiaceae	Iamia	unclassified
OTU7	yes	yes	yes	group_JulFL_vs_JulPA	485	35	3.76636	4.58941e-14	Actinobacteriota	Acidimicrobiia	Microtrichales	Ilumatobacteraceae	CL500-29_marine_group	Bacteria	Actinobacteriota	Acidimicrobiia	Microtrichales	acIV	acIV-B	Iluma-B1
OTU8	yes	yes	yes	group_JulFL_vs_JulPA	846	15	5.74887	3.23066e-37	Actinobacteriota	Acidimicrobiia	Microtrichales	Ilumatobacteraceae	CL500-29_marine_group	Bacteria	Actinobacteriota	Acidimicrobiia	Microtrichales	acIV	acIV-A	Iluma-A2
OTU9	yes	yes	yes	group_JulFL_vs_JulPA	963	20	5.555	1.40272e-29	Actinobacteriota	Acidimicrobiia	Microtrichales	Ilumatobacteraceae	CL500-29_marine_group	Bacteria	Actinobacteriota	Acidimicrobiia	Microtrichales	acIV	acIV-A	Iluma-A1
OTU10	yes	yes	yes	group_JulFL_vs_JulPA	213	68	1.63552	0.00378713	Actinobacteriota	Acidimicrobiia	Microtrichales	Ilumatobacteraceae	CL500-29_marine_group	Bacteria	Actinobacteriota	Acidimicrobiia	Microtrichales	acIV	acIV-C	Iluma-C1
OTU14	yes	yes	yes	group_JulFL_vs_JulPA	273	15	4.19966	1.56025e-14	Actinobacteriota	Acidimicrobiia	Microtrichales	Ilumatobacteraceae	CL500-29_marine_group	Bacteria	Actinobacteriota	Acidimicrobiia	Microtrichales	acIV	acIV-B	unclassified
OTU44	yes	yes	yes	group_JulFL_vs_JulPA	117	0	8.27612	1.99669e-30	Actinobacteriota	Acidimicrobiia	Microtrichales	Ilumatobacteraceae	CL500-29_marine_group	Bacteria	Actinobacteriota	Acidimicrobiia	Microtrichales	Ilumatobacteraceae	CL500-29_marine_group	unclassified
OTU102	yes	yes	yes	group_JulFL_vs_JulPA	84	0	7.28969	1.64832e-24	Actinobacteriota	Acidimicrobiia	Microtrichales	Ilumatobacteraceae	CL500-29_marine_group	Bacteria	Actinobacteriota	Acidimicrobiia	Microtrichales	Ilumatobacteraceae	CL500-29_marine_group	unclassified
OTU105	yes	yes	yes	group_JulFL_vs_JulPA	28	0	7.03173	5.80784e-20	Actinobacteriota	Acidimicrobiia	Microtrichales	Ilumatobacteraceae	CL500-29_marine_group	Bacteria	Actinobacteriota	Acidimicrobiia	Microtrichales	Ilumatobacteraceae	CL500-29_marine_group	unclassified
OTU108	no	yes	no	group_JulFL_vs_JulPA	15	1	3.50957	8.95876e-09	Actinobacteriota	Acidimicrobiia	Microtrichales	Ilumatobacteraceae	CL500-29_marine_group	Bacteria	Actinobacteriota	Acidimicrobiia	Microtrichales	acIV	acIV-C	unclassified
OTU117	yes	yes	yes	group_JulFL_vs_JulPA	18	0	6.14384	8.21913e-15	Actinobacteriota	Acidimicrobiia	Microtrichales	Ilumatobacteraceae	CL500-29_marine_group	Bacteria	Actinobacteriota	Acidimicrobiia	Microtrichales	Ilumatobacteraceae	CL500-29_marine_group	unclassified
OTU119	yes	yes	yes	group_JulFL_vs_JulPA	29	0	6.56072	3.74237e-17	Actinobacteriota	Acidimicrobiia	Microtrichales	Ilumatobacteraceae	CL500-29_marine_group	Bacteria	Actinobacteriota	Acidimicrobiia	Microtrichales	Ilumatobacteraceae	CL500-29_marine_group	unclassified
OTU140	yes	yes	yes	group_JulFL_vs_JulPA	19	0	6.4409	1.22458e-16	Actinobacteriota	Acidimicrobiia	Microtrichales	Ilumatobacteraceae	CL500-29_marine_group	Bacteria	Actinobacteriota	Acidimicrobiia	Microtrichales	Ilumatobacteraceae	CL500-29_marine_group	unclassified
OTU149	no	yes	no	group_JulFL_vs_JulPA	12	0	6.11228	1.2777e-14	Actinobacteriota	Acidimicrobiia	Microtrichales	Ilumatobacteraceae	CL500-29_marine_group	Bacteria	Actinobacteriota	Acidimicrobiia	Microtrichales	Ilumatobacteraceae	CL500-29_marine_group	unclassified
OTU163	no	yes	no	group_JulFL_vs_JulPA	10	0	5.85933	4.63168e-13	Actinobacteriota	Acidimicrobiia	Microtrichales	Ilumatobacteraceae	CL500-29_marine_group	Bacteria	Actinobacteriota	Acidimicrobiia	Microtrichales	Ilumatobacteraceae	CL500-29_marine_group	unclassified
OTU204	no	yes	no	group_JulFL_vs_JulPA	13	0	5.98886	6.4698e-14	Actinobacteriota	Acidimicrobiia	Microtrichales	Ilumatobacteraceae	CL500-29_marine_group	Bacteria	Actinobacteriota	Acidimicrobiia	Microtrichales	Ilumatobacteraceae	CL500-29_marine_group	unclassified
OTU208	no	no	no	group_JulFL_vs_JulPA	0	5	-3.20431	0.00132098	Actinobacteriota	Acidimicrobiia	Microtrichales	Ilumatobacteraceae	CL500-29_marine_group	Bacteria	Actinobacteriota	Acidimicrobiia	Microtrichales	Ilumatobacteraceae	CL500-29_marine_group	unclassified
OTU227	no	yes	no	group_JulFL_vs_JulPA	21	0	6.11967	4.58941e-14	Actinobacteriota	Acidimicrobiia	Microtrichales	Ilumatobacteraceae	CL500-29_marine_group	Bacteria	Actinobacteriota	Acidimicrobiia	Microtrichales	Ilumatobacteraceae	CL500-29_marine_group	unclassified
OTU244	no	yes	no	group_JulFL_vs_JulPA	15	0	6.09891	4.00611e-14	Actinobacteriota	Acidimicrobiia	Microtrichales	Ilumatobacteraceae	CL500-29_marine_group	Bacteria	Actinobacteriota	Acidimicrobiia	Microtrichales	Ilumatobacteraceae	CL500-29_marine_group	unclassified
OTU249	no	yes	no	group_JulFL_vs_JulPA	6	0	5.23548	4.71204e-10	Actinobacteriota	Acidimicrobiia	Microtrichales	Ilumatobacteraceae	CL500-29_marine_group	Bacteria	Actinobacteriota	Acidimicrobiia	Microtrichales	Ilumatobacteraceae	CL500-29_marine_group	unclassified
OTU258	yes	yes	yes	group_JulFL_vs_JulPA	17	0	6.56542	1.46845e-16	Actinobacteriota	Acidimicrobiia	Microtrichales	Ilumatobacteraceae	CL500-29_marine_group	Bacteria	Actinobacteriota	Acidimicrobiia	Microtrichales	Ilumatobacteraceae	CL500-29_marine_group	unclassified
OTU287	yes	yes	yes	group_JulFL_vs_JulPA	27	0	6.96672	3.05683e-20	Actinobacteriota	Acidimicrobiia	Microtrichales	Ilumatobacteraceae	CL500-29_marine_group	Bacteria	Actinobacteriota	Acidimicrobiia	Microtrichales	Ilumatobacteraceae	CL500-29_marine_group	unclassified
OTU316	yes	yes	yes	group_JulFL_vs_JulPA	30	0	7.10773	1.15903e-20	Actinobacteriota	Acidimicrobiia	Microtrichales	Ilumatobacteraceae	CL500-29_marine_group	Bacteria	Actinobacteriota	Acidimicrobiia	Microtrichales	Ilumatobacteraceae	CL500-29_marine_group	unclassified
OTU318	yes	yes	yes	group_JulFL_vs_JulPA	19	0	6.45634	1.54216e-16	Actinobacteriota	Acidimicrobiia	Microtrichales	Ilumatobacteraceae	CL500-29_marine_group	Bacteria	Actinobacteriota	Acidimicrobiia	Microtrichales	Ilumatobacteraceae	CL500-29_marine_group	unclassified
OTU325	no	yes	no	group_JulFL_vs_JulPA	5	0	4.97177	8.78856e-08	Actinobacteriota	Acidimicrobiia	Microtrichales	Ilumatobacteraceae	CL500-29_marine_group	Bacteria	Actinobacteriota	Acidimicrobiia	Microtrichales	Ilumatobacteraceae	CL500-29_marine_group	unclassified
OTU334	yes	yes	yes	group_JulFL_vs_JulPA	16	0	6.52458	5.57174e-16	Actinobacteriota	Acidimicrobiia	Microtrichales	Ilumatobacteraceae	CL500-29_marine_group	Bacteria	Actinobacteriota	Acidimicrobiia	Microtrichales	Ilumatobacteraceae	CL500-29_marine_group	unclassified
OTU354	no	no	no	group_JulFL_vs_JulPA	3	0	3.17086	0.00132098	Actinobacteriota	Acidimicrobiia	Microtrichales	Ilumatobacteraceae	CL500-29_marine_group	Bacteria	Actinobacteriota	Acidimicrobiia	Microtrichales	Ilumatobacteraceae	CL500-29_marine_group	unclassified
OTU357	no	yes	no	group_JulFL_vs_JulPA	2	0	3.76854	0.000107022	Actinobacteriota	Acidimicrobiia	Microtrichales	Ilumatobacteraceae	CL500-29_marine_group	Bacteria	Actinobacteriota	Acidimicrobiia	Microtrichales	Ilumatobacteraceae	CL500-29_marine_group	unclassified
OTU368	no	yes	no	group_JulFL_vs_JulPA	7	0	5.42706	5.70879e-11	Actinobacteriota	Acidimicrobiia	Microtrichales	Ilumatobacteraceae	CL500-29_marine_group	Bacteria	Actinobacteriota	Acidimicrobiia	Microtrichales	Ilumatobacteraceae	CL500-29_marine_group	unclassified
OTU370	no	yes	no	group_JulFL_vs_JulPA	9	0	5.75055	2.01801e-12	Actinobacteriota	Acidimicrobiia	Microtrichales	Ilumatobacteraceae	CL500-29_marine_group	Bacteria	Actinobacteriota	Acidimicrobiia	Microtrichales	Ilumatobacteraceae	CL500-29_marine_group	unclassified
OTU382	no	no	no	group_JulFL_vs_JulPA	2	0	3.53326	0.0035365	Actinobacteriota	Acidimicrobiia	Microtrichales	Ilumatobacteraceae	CL500-29_marine_group	Bacteria	Actinobacteriota	Acidimicrobiia	Microtrichales	Ilumatobacteraceae	CL500-29_marine_group	unclassified
OTU383	no	no	no	group_JulFL_vs_JulPA	2	0	3.38142	0.00136888	Actinobacteriota	Acidimicrobiia	Microtrichales	Ilumatobacteraceae	CL500-29_marine_group	Bacteria	Actinobacteriota	Acidimicrobiia	Microtrichales	Ilumatobacteraceae	CL500-29_marine_group	unclassified
OTU384	no	no	no	group_JulFL_vs_JulPA	1	0	3.3507	0.0035365	Actinobacteriota	Acidimicrobiia	Microtrichales	Ilumatobacteraceae	CL500-29_marine_group	Bacteria	Actinobacteriota	Acidimicrobiia	Microtrichales	Ilumatobacteraceae	CL500-29_marine_group	unclassified
OTU387	no	yes	no	group_JulFL_vs_JulPA	4	0	4.55075	1.17985e-06	Actinobacteriota	Acidimicrobiia	Microtrichales	Ilumatobacteraceae	CL500-29_marine_group	Bacteria	Actinobacteriota	Acidimicrobiia	Microtrichales	Ilumatobacteraceae	CL500-29_marine_group	unclassified
OTU407	no	yes	no	group_JulFL_vs_JulPA	2	0	3.61192	0.000574963	Actinobacteriota	Acidimicrobiia	Microtrichales	Ilumatobacteraceae	CL500-29_marine_group	Bacteria	Actinobacteriota	Acidimicrobiia	Microtrichales	Ilumatobacteraceae	CL500-29_marine_group	unclassified
OTU409	no	yes	no	group_JulFL_vs_JulPA	7	0	5.28465	5.97167e-10	Actinobacteriota	Acidimicrobiia	Microtrichales	Ilumatobacteraceae	CL500-29_marine_group	Bacteria	Actinobacteriota	Acidimicrobiia	Microtrichales	Ilumatobacteraceae	CL500-29_marine_group	unclassified
OTU422	no	no	no	group_JulFL_vs_JulPA	6	0	4.37989	9.78244e-06	Actinobacteriota	Acidimicrobiia	Microtrichales	Ilumatobacteraceae	CL500-29_marine_group	Bacteria	Actinobacteriota	Acidimicrobiia	Microtrichales	Ilumatobacteraceae	CL500-29_marine_group	unclassified
OTU435	no	yes	no	group_JulFL_vs_JulPA	10	0	5.57546	4.34321e-12	Actinobacteriota	Acidimicrobiia	Microtrichales	Ilumatobacteraceae	CL500-29_marine_group	Bacteria	Actinobacteriota	Acidimicrobiia	Microtrichales	Ilumatobacteraceae	CL500-29_marine_group	unclassified
OTU439	no	no	no	group_JulFL_vs_JulPA	11	0	5.94248	1.9102e-12	Actinobacteriota	Acidimicrobiia	Microtrichales	Ilumatobacteraceae	CL500-29_marine_group	Bacteria	Actinobacteriota	Acidimicrobiia	Microtrichales	Ilumatobacteraceae	CL500-29_marine_group	unclassified
OTU440	no	yes	no	group_JulFL_vs_JulPA	5	0	5.00572	1.07255e-08	Actinobacteriota	Acidimicrobiia	Microtrichales	Ilumatobacteraceae	CL500-29_marine_group	Bacteria	Actinobacteriota	Acidimicrobiia	Microtrichales	Ilumatobacteraceae	CL500-29_marine_group	unclassified
OTU450	no	yes	no	group_JulFL_vs_JulPA	2	0	3.96994	6.95613e-05	Actinobacteriota	Acidimicrobiia	Microtrichales	Ilumatobacteraceae	CL500-29_marine_group	Bacteria	Actinobacteriota	Acidimicrobiia	Microtrichales	Ilumatobacteraceae	CL500-29_marine_group	unclassified
OTU461	no	yes	no	group_JulFL_vs_JulPA	12	0	6.05672	4.00611e-14	Actinobacteriota	Acidimicrobiia	Microtrichales	Ilumatobacteraceae	CL500-29_marine_group	Bacteria	Actinobacteriota	Acidimicrobiia	Microtrichales	Ilumatobacteraceae	CL500-29_marine_group	unclassified
OTU465	no	yes	no	group_JulFL_vs_JulPA	2	0	3.71932	0.000784315	Actinobacteriota	Acidimicrobiia	Microtrichales	Ilumatobacteraceae	CL500-29_marine_group	Bacteria	Actinobacteriota	Acidimicrobiia	Microtrichales	Ilumatobacteraceae	CL500-29_marine_group	unclassified
OTU467	no	no	no	group_JulFL_vs_JulPA	9	0	3.61469	8.39811e-06	Actinobacteriota	Acidimicrobiia	Microtrichales	Ilumatobacteraceae	CL500-29_marine_group	Bacteria	Actinobacteriota	Acidimicrobiia	Microtrichales	Ilumatobacteraceae	CL500-29_marine_group	unclassified
OTU474	no	yes	no	group_JulFL_vs_JulPA	8	0	5.21092	3.60487e-10	Actinobacteriota	Acidimicrobiia	Microtrichales	Ilumatobacteraceae	CL500-29_marine_group	Bacteria	Actinobacteriota	Acidimicrobiia	Microtrichales	Ilumatobacteraceae	CL500-29_marine_group	unclassified
OTU481	no	yes	no	group_JulFL_vs_JulPA	4	0	4.62081	7.98912e-07	Actinobacteriota	Acidimicrobiia	Microtrichales	Ilumatobacteraceae	CL500-29_marine_group	Bacteria	Actinobacteriota	Acidimicrobiia	Microtrichales	Ilumatobacteraceae	CL500-29_marine_group	unclassified
OTU489	no	yes	no	group_JulFL_vs_JulPA	5	0	4.75575	1.29878e-07	Actinobacteriota	Acidimicrobiia	Microtrichales	Ilumatobacteraceae	CL500-29_marine_group	Bacteria	Actinobacteriota	Acidimicrobiia	Microtrichales	Ilumatobacteraceae	CL500-29_marine_group	unclassified
OTU498	no	yes	no	group_JulFL_vs_JulPA	4	0	4.50456	1.58122e-06	Actinobacteriota	Acidimicrobiia	Microtrichales	Ilumatobacteraceae	CL500-29_marine_group	Bacteria	Actinobacteriota	Acidimicrobiia	Microtrichales	Ilumatobacteraceae	CL500-29_marine_group	unclassified
OTU499	no	no	no	group_JulFL_vs_JulPA	4	0	4.21557	5.7326e-05	Actinobacteriota	Acidimicrobiia	Microtrichales	Ilumatobacteraceae	CL500-29_marine_group	Bacteria	Actinobacteriota	Acidimicrobiia	Microtrichales	Ilumatobacteraceae	CL500-29_marine_group	unclassified
OTU507	no	no	no	group_JulFL_vs_JulPA	3	0	3.79899	0.000453082	Actinobacteriota	Acidimicrobiia	Microtrichales	Ilumatobacteraceae	CL500-29_marine_group	Bacteria	Actinobacteriota	Acidimicrobiia	Microtrichales	Ilumatobacteraceae	CL500-29_marine_group	unclassified
OTU512	no	yes	no	group_JulFL_vs_JulPA	6	0	4.92429	4.7505e-09	Actinobacteriota	Acidimicrobiia	Microtrichales	Ilumatobacteraceae	CL500-29_marine_group	Bacteria	Actinobacteriota	Acidimicrobiia	Microtrichales	Ilumatobacteraceae	CL500-29_marine_group	unclassified
OTU517	no	yes	no	group_JulFL_vs_JulPA	8	0	4.30677	1.46943e-07	Actinobacteriota	Acidimicrobiia	Microtrichales	Ilumatobacteraceae	CL500-29_marine_group	Bacteria	Actinobacteriota	Acidimicrobiia	Microtrichales	Ilumatobacteraceae	CL500-29_marine_group	unclassified
OTU519	no	no	no	group_JulFL_vs_JulPA	3	0	4.25677	1.82314e-05	Actinobacteriota	Acidimicrobiia	Microtrichales	Ilumatobacteraceae	CL500-29_marine_group	Bacteria	Actinobacteriota	Acidimicrobiia	Microtrichales	Ilumatobacteraceae	CL500-29_marine_group	unclassified
OTU528	no	yes	no	group_JulFL_vs_JulPA	6	0	5.25178	2.58168e-10	Actinobacteriota	Acidimicrobiia	Microtrichales	Ilumatobacteraceae	CL500-29_marine_group	Bacteria	Actinobacteriota	Acidimicrobiia	Microtrichales	Ilumatobacteraceae	CL500-29_marine_group	unclassified
OTU529	no	yes	no	group_JulFL_vs_JulPA	2	0	3.72823	0.000250437	Actinobacteriota	Acidimicrobiia	Microtrichales	Ilumatobacteraceae	CL500-29_marine_group	Bacteria	Actinobacteriota	Acidimicrobiia	Microtrichales	Ilumatobacteraceae	CL500-29_marine_group	unclassified
OTU537	no	yes	no	group_JulFL_vs_JulPA	1	0	3.4322	0.00165099	Actinobacteriota	Acidimicrobiia	Microtrichales	Ilumatobacteraceae	CL500-29_marine_group	Bacteria	Actinobacteriota	Acidimicrobiia	Microtrichales	Ilumatobacteraceae	CL500-29_marine_group	unclassified
OTU551	no	no	no	group_JulFL_vs_JulPA	3	0	3.35709	0.000804535	Actinobacteriota	Acidimicrobiia	Microtrichales	Ilumatobacteraceae	CL500-29_marine_group	Bacteria	Actinobacteriota	Acidimicrobiia	Microtrichales	Ilumatobacteraceae	CL500-29_marine_group	unclassified
OTU556	no	no	no	group_JulFL_vs_JulPA	4	0	4.46566	1.69939e-06	Actinobacteriota	Acidimicrobiia	Microtrichales	Ilumatobacteraceae	CL500-29_marine_group	Bacteria	Actinobacteriota	Acidimicrobiia	Microtrichales	Ilumatobacteraceae	CL500-29_marine_group	unclassified
OTU557	no	yes	no	group_JulFL_vs_JulPA	5	0	4.52878	1.09453e-06	Actinobacteriota	Acidimicrobiia	Microtrichales	Ilumatobacteraceae	CL500-29_marine_group	Bacteria	Actinobacteriota	Acidimicrobiia	Microtrichales	Ilumatobacteraceae	CL500-29_marine_group	unclassified
OTU561	no	yes	no	group_JulFL_vs_JulPA	2	0	3.50341	0.00143816	Actinobacteriota	Acidimicrobiia	Microtrichales	Ilumatobacteraceae	CL500-29_marine_group	Bacteria	Actinobacteriota	Acidimicrobiia	Microtrichales	Ilumatobacteraceae	CL500-29_marine_group	unclassified
OTU569	no	yes	no	group_JulFL_vs_JulPA	4	0	4.6963	2.39687e-07	Actinobacteriota	Acidimicrobiia	Microtrichales	Ilumatobacteraceae	CL500-29_marine_group	Bacteria	Actinobacteriota	Acidimicrobiia	Microtrichales	Ilumatobacteraceae	CL500-29_marine_group	unclassified
OTU574	no	no	no	group_JulFL_vs_JulPA	4	0	4.45239	5.57059e-06	Actinobacteriota	Acidimicrobiia	Microtrichales	Ilumatobacteraceae	CL500-29_marine_group	Bacteria	Actinobacteriota	Acidimicrobiia	Microtrichales	Ilumatobacteraceae	CL500-29_marine_group	unclassified
OTU582	no	yes	no	group_JulFL_vs_JulPA	3	0	4.24144	1.86494e-05	Actinobacteriota	Acidimicrobiia	Microtrichales	Ilumatobacteraceae	CL500-29_marine_group	Bacteria	Actinobacteriota	Acidimicrobiia	Microtrichales	Ilumatobacteraceae	CL500-29_marine_group	unclassified
OTU584	no	no	no	group_JulFL_vs_JulPA	4	0	4.13428	1.0602e-05	Actinobacteriota	Acidimicrobiia	Microtrichales	Ilumatobacteraceae	CL500-29_marine_group	Bacteria	Actinobacteriota	Acidimicrobiia	Microtrichales	Ilumatobacteraceae	CL500-29_marine_group	unclassified
OTU600	no	yes	no	group_JulFL_vs_JulPA	15	0	5.39335	4.09902e-12	Actinobacteriota	Acidimicrobiia	Microtrichales	Ilumatobacteraceae	CL500-29_marine_group	Bacteria	Actinobacteriota	Acidimicrobiia	Microtrichales	Ilumatobacteraceae	CL500-29_marine_group	unclassified
OTU609	no	no	no	group_JulFL_vs_JulPA	1	0	3.27644	0.0087257	Actinobacteriota	Acidimicrobiia	Microtrichales	Ilumatobacteraceae	CL500-29_marine_group	Bacteria	Actinobacteriota	Acidimicrobiia	Microtrichales	Ilumatobacteraceae	CL500-29_marine_group	unclassified
OTU621	no	yes	no	group_JulFL_vs_JulPA	3	0	4.15183	5.64787e-05	Actinobacteriota	Acidimicrobiia	Microtrichales	Ilumatobacteraceae	CL500-29_marine_group	Bacteria	Actinobacteriota	Acidimicrobiia	Microtrichales	Ilumatobacteraceae	CL500-29_marine_group	unclassified
OTU669	no	no	no	group_JulFL_vs_JulPA	2	0	3.59177	0.00617663	Actinobacteriota	Acidimicrobiia	Microtrichales	Ilumatobacteraceae	CL500-29_marine_group	Bacteria	Actinobacteriota	Acidimicrobiia	Microtrichales	Ilumatobacteraceae	CL500-29_marine_group	unclassified
OTU671	no	no	no	group_JulFL_vs_JulPA	2	0	3.65989	0.000668316	Actinobacteriota	Acidimicrobiia	Microtrichales	Ilumatobacteraceae	CL500-29_marine_group	Bacteria	Actinobacteriota	Acidimicrobiia	Microtrichales	Ilumatobacteraceae	CL500-29_marine_group	unclassified
OTU702	no	yes	no	group_JulFL_vs_JulPA	5	0	4.9294	2.26459e-08	Actinobacteriota	Acidimicrobiia	Microtrichales	Ilumatobacteraceae	CL500-29_marine_group	Bacteria	Actinobacteriota	Acidimicrobiia	Microtrichales	Ilumatobacteraceae	CL500-29_marine_group	unclassified
OTU728	no	yes	no	group_JulFL_vs_JulPA	1	0	3.38001	0.00241928	Actinobacteriota	Acidimicrobiia	Microtrichales	Ilumatobacteraceae	CL500-29_marine_group	Bacteria	Actinobacteriota	Acidimicrobiia	Microtrichales	Ilumatobacteraceae	CL500-29_marine_group	unclassified
OTU733	yes	yes	yes	group_JulFL_vs_JulPA	17	0	6.04192	1.48734e-14	Actinobacteriota	Acidimicrobiia	Microtrichales	Ilumatobacteraceae	CL500-29_marine_group	Bacteria	Actinobacteriota	Acidimicrobiia	Microtrichales	Ilumatobacteraceae	CL500-29_marine_group	unclassified
OTU736	no	yes	no	group_JulFL_vs_JulPA	3	0	4.16884	1.457e-05	Actinobacteriota	Acidimicrobiia	Microtrichales	Ilumatobacteraceae	CL500-29_marine_group	Bacteria	Actinobacteriota	Acidimicrobiia	Microtrichales	Ilumatobacteraceae	CL500-29_marine_group	unclassified
OTU750	no	no	no	group_JulFL_vs_JulPA	3	0	4.13083	0.000122748	Actinobacteriota	Acidimicrobiia	Microtrichales	Ilumatobacteraceae	CL500-29_marine_group	Bacteria	Actinobacteriota	Acidimicrobiia	Microtrichales	Ilumatobacteraceae	CL500-29_marine_group	unclassified
OTU777	no	yes	no	group_JulFL_vs_JulPA	7	0	5.40377	8.82871e-11	Actinobacteriota	Acidimicrobiia	Microtrichales	Ilumatobacteraceae	CL500-29_marine_group	Bacteria	Actinobacteriota	Acidimicrobiia	Microtrichales	Ilumatobacteraceae	CL500-29_marine_group	unclassified
OTU787	no	no	no	group_JulFL_vs_JulPA	1	0	3.40507	0.0091589	Actinobacteriota	Acidimicrobiia	Microtrichales	Ilumatobacteraceae	CL500-29_marine_group	Bacteria	Actinobacteriota	Acidimicrobiia	Microtrichales	Ilumatobacteraceae	CL500-29_marine_group	unclassified
OTU799	no	no	no	group_JulFL_vs_JulPA	2	0	3.52346	0.00132927	Actinobacteriota	Acidimicrobiia	Microtrichales	Ilumatobacteraceae	CL500-29_marine_group	Bacteria	Actinobacteriota	Acidimicrobiia	Microtrichales	Ilumatobacteraceae	CL500-29_marine_group	unclassified
OTU818	no	no	no	group_JulFL_vs_JulPA	2	0	3.53791	0.00838962	Actinobacteriota	Acidimicrobiia	Microtrichales	Ilumatobacteraceae	CL500-29_marine_group	Bacteria	Actinobacteriota	Acidimicrobiia	Microtrichales	Ilumatobacteraceae	CL500-29_marine_group	unclassified
OTU839	no	no	no	group_JulFL_vs_JulPA	2	0	3.78211	0.00193133	Actinobacteriota	Acidimicrobiia	Microtrichales	Ilumatobacteraceae	CL500-29_marine_group	Bacteria	Actinobacteriota	Acidimicrobiia	Microtrichales	Ilumatobacteraceae	CL500-29_marine_group	unclassified
OTU858	no	no	no	group_JulFL_vs_JulPA	4	0	4.34463	1.07959e-05	Actinobacteriota	Acidimicrobiia	Microtrichales	Ilumatobacteraceae	CL500-29_marine_group	Bacteria	Actinobacteriota	Acidimicrobiia	Microtrichales	Ilumatobacteraceae	CL500-29_marine_group	unclassified
OTU877	no	no	no	group_JulFL_vs_JulPA	2	0	3.68018	0.00493048	Actinobacteriota	Acidimicrobiia	Microtrichales	Ilumatobacteraceae	CL500-29_marine_group	Bacteria	Actinobacteriota	Acidimicrobiia	Microtrichales	Ilumatobacteraceae	CL500-29_marine_group	unclassified
OTU897	no	no	no	group_JulFL_vs_JulPA	2	0	3.73444	0.00314788	Actinobacteriota	Acidimicrobiia	Microtrichales	Ilumatobacteraceae	CL500-29_marine_group	Bacteria	Actinobacteriota	Acidimicrobiia	Microtrichales	Ilumatobacteraceae	CL500-29_marine_group	unclassified
OTU903	no	yes	no	group_JulFL_vs_JulPA	10	0	5.52598	1.32803e-11	Actinobacteriota	Acidimicrobiia	Microtrichales	Ilumatobacteraceae	CL500-29_marine_group	Bacteria	Actinobacteriota	Acidimicrobiia	Microtrichales	Ilumatobacteraceae	CL500-29_marine_group	unclassified
OTU935	no	no	no	group_JulFL_vs_JulPA	2	0	3.76275	0.000659363	Actinobacteriota	Acidimicrobiia	Microtrichales	Ilumatobacteraceae	CL500-29_marine_group	Bacteria	Actinobacteriota	Acidimicrobiia	Microtrichales	Ilumatobacteraceae	CL500-29_marine_group	unclassified
OTU966	no	no	no	group_JulFL_vs_JulPA	2	0	3.75275	0.000116256	Actinobacteriota	Acidimicrobiia	Microtrichales	Ilumatobacteraceae	CL500-29_marine_group	Bacteria	Actinobacteriota	Acidimicrobiia	Microtrichales	Ilumatobacteraceae	CL500-29_marine_group	unclassified
OTU990	no	no	no	group_JulFL_vs_JulPA	2	0	3.73135	0.00193133	Actinobacteriota	Acidimicrobiia	Microtrichales	Ilumatobacteraceae	CL500-29_marine_group	Bacteria	Actinobacteriota	Acidimicrobiia	Microtrichales	Ilumatobacteraceae	CL500-29_marine_group	unclassified
OTU1002	no	no	no	group_JulFL_vs_JulPA	2	0	3.77311	0.000321712	Actinobacteriota	Acidimicrobiia	Microtrichales	Ilumatobacteraceae	CL500-29_marine_group	Bacteria	Actinobacteriota	Acidimicrobiia	Microtrichales	Ilumatobacteraceae	CL500-29_marine_group	unclassified
OTU1012	no	no	no	group_JulFL_vs_JulPA	3	0	4.01686	0.000176668	Actinobacteriota	Acidimicrobiia	Microtrichales	Ilumatobacteraceae	CL500-29_marine_group	Bacteria	Actinobacteriota	Acidimicrobiia	Microtrichales	Ilumatobacteraceae	CL500-29_marine_group	unclassified
OTU1017	no	yes	no	group_JulFL_vs_JulPA	1	0	3.34447	0.00320082	Actinobacteriota	Acidimicrobiia	Microtrichales	Ilumatobacteraceae	CL500-29_marine_group	Bacteria	Actinobacteriota	Acidimicrobiia	Microtrichales	Ilumatobacteraceae	CL500-29_marine_group	unclassified
OTU1019	no	no	no	group_JulFL_vs_JulPA	5	0	4.6782	4.66797e-08	Actinobacteriota	Acidimicrobiia	Microtrichales	Ilumatobacteraceae	CL500-29_marine_group	Bacteria	Actinobacteriota	Acidimicrobiia	Microtrichales	Ilumatobacteraceae	CL500-29_marine_group	unclassified
OTU1053	no	no	no	group_JulFL_vs_JulPA	2	0	3.85321	0.00052508	Actinobacteriota	Acidimicrobiia	Microtrichales	Ilumatobacteraceae	CL500-29_marine_group	Bacteria	Actinobacteriota	Acidimicrobiia	Microtrichales	Ilumatobacteraceae	CL500-29_marine_group	unclassified
OTU1074	no	no	no	group_JulFL_vs_JulPA	3	0	3.60366	0.00035229	Actinobacteriota	Acidimicrobiia	Microtrichales	Ilumatobacteraceae	CL500-29_marine_group	Bacteria	Actinobacteriota	Acidimicrobiia	Microtrichales	Ilumatobacteraceae	CL500-29_marine_group	unclassified
OTU1103	no	no	no	group_JulFL_vs_JulPA	3	0	4.36078	7.16542e-06	Actinobacteriota	Acidimicrobiia	Microtrichales	Ilumatobacteraceae	CL500-29_marine_group	Bacteria	Actinobacteriota	Acidimicrobiia	Microtrichales	Ilumatobacteraceae	CL500-29_marine_group	unclassified
OTU1123	no	no	no	group_JulFL_vs_JulPA	4	0	4.6814	3.77147e-07	Actinobacteriota	Acidimicrobiia	Microtrichales	Ilumatobacteraceae	CL500-29_marine_group	Bacteria	Actinobacteriota	Acidimicrobiia	Microtrichales	Ilumatobacteraceae	CL500-29_marine_group	unclassified
OTU1148	no	yes	no	group_JulFL_vs_JulPA	5	0	4.94962	1.51639e-08	Actinobacteriota	Acidimicrobiia	Microtrichales	Ilumatobacteraceae	CL500-29_marine_group	Bacteria	Actinobacteriota	Acidimicrobiia	Microtrichales	Ilumatobacteraceae	CL500-29_marine_group	unclassified
OTU1210	yes	yes	yes	group_JulFL_vs_JulPA	30	0	7.13475	1.6274e-21	Actinobacteriota	Acidimicrobiia	Microtrichales	Ilumatobacteraceae	CL500-29_marine_group	Bacteria	Actinobacteriota	Acidimicrobiia	Microtrichales	Ilumatobacteraceae	CL500-29_marine_group	unclassified
OTU1211	no	no	no	group_JulFL_vs_JulPA	2	0	3.51462	0.00193133	Actinobacteriota	Acidimicrobiia	Microtrichales	Ilumatobacteraceae	CL500-29_marine_group	Bacteria	Actinobacteriota	Acidimicrobiia	Microtrichales	Ilumatobacteraceae	CL500-29_marine_group	unclassified
OTU1224	no	no	no	group_JulFL_vs_JulPA	2	0	3.881	0.0014359	Actinobacteriota	Acidimicrobiia	Microtrichales	Ilumatobacteraceae	CL500-29_marine_group	Bacteria	Actinobacteriota	Acidimicrobiia	Microtrichales	Ilumatobacteraceae	CL500-29_marine_group	unclassified
OTU1260	no	no	no	group_JulFL_vs_JulPA	1	0	3.4286	0.00877814	Actinobacteriota	Acidimicrobiia	Microtrichales	Ilumatobacteraceae	CL500-29_marine_group	Bacteria	Actinobacteriota	Acidimicrobiia	Microtrichales	Ilumatobacteraceae	CL500-29_marine_group	unclassified
OTU1262	no	no	no	group_JulFL_vs_JulPA	3	0	4.39112	4.92146e-06	Actinobacteriota	Acidimicrobiia	Microtrichales	Ilumatobacteraceae	CL500-29_marine_group	Bacteria	Actinobacteriota	Acidimicrobiia	Microtrichales	Ilumatobacteraceae	CL500-29_marine_group	unclassified
OTU1312	no	no	no	group_JulFL_vs_JulPA	4	0	4.55715	8.51593e-07	Actinobacteriota	Acidimicrobiia	Microtrichales	Ilumatobacteraceae	CL500-29_marine_group	Bacteria	Actinobacteriota	Acidimicrobiia	Microtrichales	Ilumatobacteraceae	CL500-29_marine_group	unclassified
OTU1334	no	no	no	group_JulFL_vs_JulPA	2	0	3.53486	0.00613528	Actinobacteriota	Acidimicrobiia	Microtrichales	Ilumatobacteraceae	CL500-29_marine_group	Bacteria	Actinobacteriota	Acidimicrobiia	Microtrichales	Ilumatobacteraceae	CL500-29_marine_group	unclassified
OTU1353	no	no	no	group_JulFL_vs_JulPA	2	0	3.97989	0.000538308	Actinobacteriota	Acidimicrobiia	Microtrichales	Ilumatobacteraceae	CL500-29_marine_group	Bacteria	Actinobacteriota	Acidimicrobiia	Microtrichales	Ilumatobacteraceae	CL500-29_marine_group	unclassified
OTU1389	no	no	no	group_JulFL_vs_JulPA	2	0	3.73039	0.00670524	Actinobacteriota	Acidimicrobiia	Microtrichales	Ilumatobacteraceae	CL500-29_marine_group	Bacteria	Actinobacteriota	Acidimicrobiia	Microtrichales	Ilumatobacteraceae	CL500-29_marine_group	unclassified
OTU1471	no	yes	no	group_JulFL_vs_JulPA	3	0	4.25017	1.97325e-05	Actinobacteriota	Acidimicrobiia	Microtrichales	Ilumatobacteraceae	CL500-29_marine_group	Bacteria	Actinobacteriota	Acidimicrobiia	Microtrichales	Ilumatobacteraceae	CL500-29_marine_group	unclassified
OTU1498	no	no	no	group_JulFL_vs_JulPA	5	0	4.13336	3.93946e-05	Actinobacteriota	Acidimicrobiia	Microtrichales	Ilumatobacteraceae	CL500-29_marine_group	Bacteria	Actinobacteriota	Acidimicrobiia	Microtrichales	Ilumatobacteraceae	CL500-29_marine_group	unclassified
OTU1579	no	no	no	group_JulFL_vs_JulPA	2	0	3.6337	0.000433867	Actinobacteriota	Acidimicrobiia	Microtrichales	Ilumatobacteraceae	CL500-29_marine_group	Bacteria	Actinobacteriota	Acidimicrobiia	Microtrichales	Ilumatobacteraceae	CL500-29_marine_group	unclassified
OTU1587	no	no	no	group_JulFL_vs_JulPA	3	0	4.23208	6.52015e-05	Actinobacteriota	Acidimicrobiia	Microtrichales	Ilumatobacteraceae	CL500-29_marine_group	Bacteria	Actinobacteriota	Acidimicrobiia	Microtrichales	Ilumatobacteraceae	CL500-29_marine_group	unclassified
OTU1591	no	no	no	group_JulFL_vs_JulPA	4	0	4.42517	8.29808e-06	Actinobacteriota	Acidimicrobiia	Microtrichales	Ilumatobacteraceae	CL500-29_marine_group	Bacteria	Actinobacteriota	Acidimicrobiia	Microtrichales	Ilumatobacteraceae	CL500-29_marine_group	unclassified
OTU1599	no	no	no	group_JulFL_vs_JulPA	2	0	3.70224	0.0077839	Actinobacteriota	Acidimicrobiia	Microtrichales	Ilumatobacteraceae	CL500-29_marine_group	Bacteria	Actinobacteriota	Acidimicrobiia	Microtrichales	Ilumatobacteraceae	CL500-29_marine_group	unclassified
OTU1664	no	no	no	group_JulFL_vs_JulPA	1	0	3.19325	0.00986615	Actinobacteriota	Acidimicrobiia	Microtrichales	Ilumatobacteraceae	CL500-29_marine_group	Bacteria	Actinobacteriota	Acidimicrobiia	Microtrichales	Ilumatobacteraceae	CL500-29_marine_group	unclassified
OTU1757	no	no	no	group_JulFL_vs_JulPA	1	0	3.37527	0.00523774	Actinobacteriota	Acidimicrobiia	Microtrichales	Ilumatobacteraceae	CL500-29_marine_group	Bacteria	Actinobacteriota	Acidimicrobiia	Microtrichales	Ilumatobacteraceae	CL500-29_marine_group	unclassified
OTU1785	no	yes	no	group_JulFL_vs_JulPA	5	0	4.77845	8.78856e-08	Actinobacteriota	Acidimicrobiia	Microtrichales	Ilumatobacteraceae	CL500-29_marine_group	Bacteria	Actinobacteriota	Acidimicrobiia	Microtrichales	Ilumatobacteraceae	CL500-29_marine_group	unclassified
OTU1806	no	no	no	group_JulFL_vs_JulPA	3	0	4.17126	3.42165e-05	Actinobacteriota	Acidimicrobiia	Microtrichales	Ilumatobacteraceae	CL500-29_marine_group	Bacteria	Actinobacteriota	Acidimicrobiia	Microtrichales	Ilumatobacteraceae	CL500-29_marine_group	unclassified
OTU1855	no	no	no	group_JulFL_vs_JulPA	2	0	3.76993	0.000759166	Actinobacteriota	Acidimicrobiia	Microtrichales	Ilumatobacteraceae	CL500-29_marine_group	Bacteria	Actinobacteriota	Acidimicrobiia	Microtrichales	Ilumatobacteraceae	CL500-29_marine_group	unclassified
OTU1885	no	yes	no	group_JulFL_vs_JulPA	5	0	4.64501	4.35887e-08	Actinobacteriota	Acidimicrobiia	Microtrichales	Ilumatobacteraceae	CL500-29_marine_group	Bacteria	Actinobacteriota	Acidimicrobiia	Microtrichales	Ilumatobacteraceae	CL500-29_marine_group	unclassified
OTU1899	no	no	no	group_JulFL_vs_JulPA	2	0	3.52788	0.00164072	Actinobacteriota	Acidimicrobiia	Microtrichales	Ilumatobacteraceae	CL500-29_marine_group	Bacteria	Actinobacteriota	Acidimicrobiia	Microtrichales	Ilumatobacteraceae	CL500-29_marine_group	unclassified
OTU1900	no	no	no	group_JulFL_vs_JulPA	2	0	3.62054	0.00102323	Actinobacteriota	Acidimicrobiia	Microtrichales	Ilumatobacteraceae	CL500-29_marine_group	Bacteria	Actinobacteriota	Acidimicrobiia	Microtrichales	Ilumatobacteraceae	CL500-29_marine_group	unclassified
OTU1909	no	no	no	group_JulFL_vs_JulPA	2	0	3.66251	0.00145273	Actinobacteriota	Acidimicrobiia	Microtrichales	Ilumatobacteraceae	CL500-29_marine_group	Bacteria	Actinobacteriota	Acidimicrobiia	Microtrichales	Ilumatobacteraceae	CL500-29_marine_group	unclassified
OTU1965	no	no	no	group_JulFL_vs_JulPA	2	0	3.49218	0.00626057	Actinobacteriota	Acidimicrobiia	Microtrichales	Ilumatobacteraceae	CL500-29_marine_group	Bacteria	Actinobacteriota	Acidimicrobiia	Microtrichales	Ilumatobacteraceae	CL500-29_marine_group	unclassified
OTU2065	no	yes	no	group_JulFL_vs_JulPA	2	0	3.89778	7.24586e-05	Actinobacteriota	Acidimicrobiia	Microtrichales	Ilumatobacteraceae	CL500-29_marine_group	Bacteria	Actinobacteriota	Acidimicrobiia	Microtrichales	Ilumatobacteraceae	CL500-29_marine_group	unclassified
OTU2141	no	no	no	group_JulFL_vs_JulPA	1	0	3.19951	0.0087257	Actinobacteriota	Acidimicrobiia	Microtrichales	Ilumatobacteraceae	CL500-29_marine_group	Bacteria	Actinobacteriota	Acidimicrobiia	Microtrichales	Ilumatobacteraceae	CL500-29_marine_group	unclassified
OTU2150	no	no	no	group_JulFL_vs_JulPA	2	0	3.74037	0.0026042	Actinobacteriota	Acidimicrobiia	Microtrichales	Ilumatobacteraceae	CL500-29_marine_group	Bacteria	Actinobacteriota	Acidimicrobiia	Microtrichales	Ilumatobacteraceae	CL500-29_marine_group	unclassified
OTU2400	no	no	no	group_JulFL_vs_JulPA	4	0	4.54235	3.39862e-06	Actinobacteriota	Acidimicrobiia	Microtrichales	Ilumatobacteraceae	CL500-29_marine_group	Bacteria	Actinobacteriota	Acidimicrobiia	Microtrichales	Ilumatobacteraceae	CL500-29_marine_group	unclassified
OTU2410	no	yes	no	group_JulFL_vs_JulPA	14	0	4.00669	3.23075e-09	Actinobacteriota	Acidimicrobiia	Microtrichales	Ilumatobacteraceae	CL500-29_marine_group	Bacteria	Actinobacteriota	Acidimicrobiia	Microtrichales	Ilumatobacteraceae	CL500-29_marine_group	unclassified
OTU2553	no	no	no	group_JulFL_vs_JulPA	2	0	3.50866	0.0035365	Actinobacteriota	Acidimicrobiia	Microtrichales	Ilumatobacteraceae	CL500-29_marine_group	Bacteria	Actinobacteriota	Acidimicrobiia	Microtrichales	Ilumatobacteraceae	CL500-29_marine_group	unclassified
OTU2563	no	no	no	group_JulFL_vs_JulPA	4	0	4.74074	2.39687e-07	Actinobacteriota	Acidimicrobiia	Microtrichales	Ilumatobacteraceae	CL500-29_marine_group	Bacteria	Actinobacteriota	Acidimicrobiia	Microtrichales	Ilumatobacteraceae	CL500-29_marine_group	unclassified
OTU2961	no	no	no	group_JulFL_vs_JulPA	3	0	4.34497	5.80443e-05	Actinobacteriota	Acidimicrobiia	Microtrichales	Ilumatobacteraceae	CL500-29_marine_group	Bacteria	Actinobacteriota	Acidimicrobiia	Microtrichales	Ilumatobacteraceae	CL500-29_marine_group	unclassified
OTU2962	no	no	no	group_JulFL_vs_JulPA	3	0	4.23351	2.0415e-05	Actinobacteriota	Acidimicrobiia	Microtrichales	Ilumatobacteraceae	CL500-29_marine_group	Bacteria	Actinobacteriota	Acidimicrobiia	Microtrichales	Ilumatobacteraceae	CL500-29_marine_group	unclassified
OTU2964	no	no	no	group_JulFL_vs_JulPA	3	0	4.06415	0.000205271	Actinobacteriota	Acidimicrobiia	Microtrichales	Ilumatobacteraceae	CL500-29_marine_group	Bacteria	Actinobacteriota	Acidimicrobiia	Microtrichales	Ilumatobacteraceae	CL500-29_marine_group	unclassified
OTU3297	no	yes	no	group_JulFL_vs_JulPA	2	0	3.49326	0.00125899	Actinobacteriota	Acidimicrobiia	Microtrichales	Ilumatobacteraceae	CL500-29_marine_group	Bacteria	Actinobacteriota	Acidimicrobiia	Microtrichales	Ilumatobacteraceae	CL500-29_marine_group	unclassified
OTU3443	no	no	no	group_JulFL_vs_JulPA	3	0	4.30971	2.26613e-05	Actinobacteriota	Acidimicrobiia	Microtrichales	Ilumatobacteraceae	CL500-29_marine_group	Bacteria	Actinobacteriota	Acidimicrobiia	Microtrichales	Ilumatobacteraceae	CL500-29_marine_group	unclassified
OTU3791	no	yes	no	group_JulFL_vs_JulPA	1	0	3.13173	0.00689773	Actinobacteriota	Acidimicrobiia	Microtrichales	Ilumatobacteraceae	CL500-29_marine_group	Bacteria	Actinobacteriota	Acidimicrobiia	Microtrichales	Ilumatobacteraceae	CL500-29_marine_group	unclassified
OTU4386	no	yes	no	group_JulFL_vs_JulPA	24	0	6.81639	8.70209e-19	Actinobacteriota	Acidimicrobiia	Microtrichales	Ilumatobacteraceae	CL500-29_marine_group	Bacteria	Actinobacteriota	Acidimicrobiia	Microtrichales	Ilumatobacteraceae	CL500-29_marine_group	unclassified
OTU4585	no	yes	no	group_JulFL_vs_JulPA	6	0	5.06225	4.97937e-09	Actinobacteriota	Acidimicrobiia	Microtrichales	Ilumatobacteraceae	CL500-29_marine_group	Bacteria	Actinobacteriota	Acidimicrobiia	Microtrichales	Ilumatobacteraceae	CL500-29_marine_group	unclassified
OTU4750	no	no	no	group_JulFL_vs_JulPA	3	0	4.16022	3.23566e-05	Actinobacteriota	Acidimicrobiia	Microtrichales	Ilumatobacteraceae	CL500-29_marine_group	Bacteria	Actinobacteriota	Acidimicrobiia	Microtrichales	Ilumatobacteraceae	CL500-29_marine_group	unclassified
OTU4757	no	no	no	group_JulFL_vs_JulPA	1	0	3.31206	0.00791864	Actinobacteriota	Acidimicrobiia	Microtrichales	Ilumatobacteraceae	CL500-29_marine_group	Bacteria	Actinobacteriota	Acidimicrobiia	Microtrichales	Ilumatobacteraceae	CL500-29_marine_group	unclassified
OTU4760	no	no	no	group_JulFL_vs_JulPA	4	0	4.22687	2.49334e-05	Actinobacteriota	Acidimicrobiia	Microtrichales	Ilumatobacteraceae	CL500-29_marine_group	Bacteria	Actinobacteriota	Acidimicrobiia	Microtrichales	Ilumatobacteraceae	CL500-29_marine_group	unclassified
OTU320	no	no	no	group_JulFL_vs_JulPA	0	3	-4.40568	0.00190396	Actinobacteriota	Acidimicrobiia	Microtrichales	Ilumatobacteraceae	Ilumatobacter	Bacteria	Actinobacteriota	Acidimicrobiia	Microtrichales	Ilumatobacteraceae	Ilumatobacter	unclassified
OTU1098	no	no	no	group_JulFL_vs_JulPA	2	0	3.29703	0.00315079	Actinobacteriota	Acidimicrobiia	Microtrichales	Ilumatobacteraceae	Ilumatobacteraceae_unclassified	Bacteria	Actinobacteriota	Acidimicrobiia	Microtrichales	Ilumatobacteraceae	unclassified	unclassified
OTU49	yes	yes	yes	group_JulFL_vs_JulPA	0	31	-5.88545	1.90716e-12	Actinobacteriota	Acidimicrobiia	Microtrichales	Microtrichaceae	IMCC26207	Bacteria	Actinobacteriota	Acidimicrobiia	Microtrichales	Microtrichaceae	IMCC26207	unclassified
OTU122	no	no	no	group_JulFL_vs_JulPA	14	2	2.64731	0.00010283	Actinobacteriota	Acidimicrobiia	Microtrichales	uncultured	uncultured_ge	Bacteria	Actinobacteriota	Acidimicrobiia	Microtrichales	acIV	acIV-D	Iamia
OTU165	no	yes	no	group_JulFL_vs_JulPA	0	13	-4.59917	3.64862e-07	Actinobacteriota	Acidimicrobiia	Microtrichales	uncultured	uncultured_ge	Bacteria	Actinobacteriota	Acidimicrobiia	Microtrichales	unclassified	unclassified	unclassified
OTU45	yes	yes	yes	group_JulFL_vs_JulPA	25	1	4.24528	4.39302e-11	Actinobacteriota	Actinobacteria	Actinobacteria_unclassified	Actinobacteria_unclassified	Actinobacteria_unclassified	Bacteria	Actinobacteriota	Actinobacteria	Frankiales	acSTL	acSTL-A	acSTL-A1
OTU19	yes	yes	yes	group_JulFL_vs_JulPA	106	3	4.80616	2.86234e-12	Actinobacteriota	Actinobacteria	Frankiales	Sporichthyaceae	hgcI_clade	Bacteria	Actinobacteriota	Actinobacteria	Frankiales	acI	acI-B	acI-B1
OTU65	yes	yes	yes	group_JulFL_vs_JulPA	72	5	3.7134	1.25844e-11	Actinobacteriota	Actinobacteria	Frankiales	Sporichthyaceae	hgcI_clade	Bacteria	Actinobacteriota	Actinobacteria	Frankiales	acI	acI-A	acI-A5
OTU78	yes	yes	yes	group_JulFL_vs_JulPA	23	1	4.25594	1.24095e-10	Actinobacteriota	Actinobacteria	Frankiales	Sporichthyaceae	hgcI_clade	Bacteria	Actinobacteriota	Actinobacteria	Frankiales	acI	acI-C	acI-C1
OTU86	yes	yes	yes	group_JulFL_vs_JulPA	19	1	4.13131	1.62138e-08	Actinobacteriota	Actinobacteria	Frankiales	Sporichthyaceae	hgcI_clade	Bacteria	Actinobacteriota	Actinobacteria	Frankiales	acI	acI-A	acI-A4
OTU200	no	yes	no	group_JulFL_vs_JulPA	2	0	3.87045	2.31127e-05	Actinobacteriota	Actinobacteria	Frankiales	Sporichthyaceae	hgcI_clade	Bacteria	Actinobacteriota	Actinobacteria	Frankiales	acI	acI-C	unclassified
OTU216	yes	no	no	group_JulFL_vs_JulPA	32	2	3.84924	2.67581e-08	Actinobacteriota	Actinobacteria	Frankiales	Sporichthyaceae	hgcI_clade	Bacteria	Actinobacteriota	Actinobacteria	Frankiales	Sporichthyaceae	hgcI_clade	unclassified
OTU256	no	no	no	group_JulFL_vs_JulPA	5	0	4.46094	1.82808e-06	Actinobacteriota	Actinobacteria	Frankiales	Sporichthyaceae	hgcI_clade	Bacteria	Actinobacteriota	Actinobacteria	Frankiales	acI	acI-C	acI-C2
OTU494	no	no	no	group_JulFL_vs_JulPA	2	0	3.72874	0.000373739	Actinobacteriota	Actinobacteria	Frankiales	Sporichthyaceae	hgcI_clade	Bacteria	Actinobacteriota	Actinobacteria	Frankiales	Sporichthyaceae	hgcI_clade	unclassified
OTU527	no	no	no	group_JulFL_vs_JulPA	3	0	4.23062	8.14485e-06	Actinobacteriota	Actinobacteria	Frankiales	Sporichthyaceae	hgcI_clade	Bacteria	Actinobacteriota	Actinobacteria	Frankiales	Sporichthyaceae	hgcI_clade	unclassified
OTU573	no	no	no	group_JulFL_vs_JulPA	1	0	3.05939	0.00788074	Actinobacteriota	Actinobacteria	Frankiales	Sporichthyaceae	hgcI_clade	Bacteria	Actinobacteriota	Actinobacteria	Frankiales	Sporichthyaceae	hgcI_clade	unclassified
OTU807	no	no	no	group_JulFL_vs_JulPA	5	0	4.96002	4.80069e-07	Actinobacteriota	Actinobacteria	Frankiales	Sporichthyaceae	hgcI_clade	Bacteria	Actinobacteriota	Actinobacteria	Frankiales	Sporichthyaceae	hgcI_clade	unclassified
OTU988	no	no	no	group_JulFL_vs_JulPA	1	0	3.32976	0.00735957	Actinobacteriota	Actinobacteria	Frankiales	Sporichthyaceae	hgcI_clade	Bacteria	Actinobacteriota	Actinobacteria	Frankiales	Sporichthyaceae	hgcI_clade	unclassified
OTU1393	no	yes	no	group_JulFL_vs_JulPA	4	0	4.40484	3.39862e-06	Actinobacteriota	Actinobacteria	Frankiales	Sporichthyaceae	hgcI_clade	Bacteria	Actinobacteriota	Actinobacteria	Frankiales	Sporichthyaceae	hgcI_clade	unclassified
OTU2227	no	no	no	group_JulFL_vs_JulPA	3	0	4.22288	1.82314e-05	Actinobacteriota	Actinobacteria	Frankiales	Sporichthyaceae	hgcI_clade	Bacteria	Actinobacteriota	Actinobacteria	Frankiales	Sporichthyaceae	hgcI_clade	unclassified
OTU356	no	yes	no	group_JulFL_vs_JulPA	3	0	4.4524	4.91014e-07	Actinobacteriota	Actinobacteria	Frankiales	Sporichthyaceae	Sporichthyaceae_ge	Bacteria	Actinobacteriota	Actinobacteria	Frankiales	Sporichthyaceae	unclassified	unclassified
OTU611	no	yes	no	group_JulFL_vs_JulPA	3	0	4.29883	8.73208e-06	Actinobacteriota	Actinobacteria	Frankiales	Sporichthyaceae	Sporichthyaceae_ge	Bacteria	Actinobacteriota	Actinobacteria	Frankiales	Sporichthyaceae	unclassified	unclassified
OTU2764	no	no	no	group_JulFL_vs_JulPA	1	0	3.42725	0.00322305	Actinobacteriota	Actinobacteria	Frankiales	Sporichthyaceae	Sporichthyaceae_ge	Bacteria	Actinobacteriota	Actinobacteria	Frankiales	Sporichthyaceae	unclassified	unclassified
OTU3	yes	yes	yes	group_JulFL_vs_JulPA	284	15	4.1965	3.90486e-14	Actinobacteriota	Actinobacteria	Frankiales	Sporichthyaceae	Sporichthyaceae_unclassified	Bacteria	Actinobacteriota	Actinobacteria	Frankiales	acI	acI-A	acI-A7
OTU93	yes	yes	yes	group_JulFL_vs_JulPA	21	1	4.41412	1.62411e-11	Actinobacteriota	Actinobacteria	Frankiales	Sporichthyaceae	Sporichthyaceae_unclassified	Bacteria	Actinobacteriota	Actinobacteria	Frankiales	acI	acI-A	acI-A1
OTU168	no	no	no	group_JulFL_vs_JulPA	9	0	5.71165	1.52215e-10	Actinobacteriota	Actinobacteria	Frankiales	Sporichthyaceae	Sporichthyaceae_unclassified	Bacteria	Actinobacteriota	Actinobacteria	Frankiales	Sporichthyaceae	unclassified	unclassified
OTU197	no	yes	no	group_JulFL_vs_JulPA	7	0	3.43973	1.82314e-05	Actinobacteriota	Actinobacteria	Frankiales	Sporichthyaceae	Sporichthyaceae_unclassified	Bacteria	Actinobacteriota	Actinobacteria	Frankiales	Sporichthyaceae	unclassified	unclassified
OTU266	no	yes	no	group_JulFL_vs_JulPA	11	0	4.6077	6.79079e-08	Actinobacteriota	Actinobacteria	Frankiales	Sporichthyaceae	Sporichthyaceae_unclassified	Bacteria	Actinobacteriota	Actinobacteria	Frankiales	Sporichthyaceae	Candidatus_Planktophila	unclassified
OTU345	yes	yes	yes	group_JulFL_vs_JulPA	17	0	4.57888	1.32373e-10	Actinobacteriota	Actinobacteria	Frankiales	Sporichthyaceae	Sporichthyaceae_unclassified	Bacteria	Actinobacteriota	Actinobacteria	Frankiales	acI	acI-A	unclassified
OTU715	no	no	no	group_JulFL_vs_JulPA	1	0	3.16787	0.0087257	Actinobacteriota	Actinobacteria	Frankiales	Sporichthyaceae	Sporichthyaceae_unclassified	Bacteria	Actinobacteriota	Actinobacteria	Frankiales	Sporichthyaceae	unclassified	unclassified
OTU840	no	yes	no	group_JulFL_vs_JulPA	4	0	4.51735	3.77147e-07	Actinobacteriota	Actinobacteria	Frankiales	Sporichthyaceae	Sporichthyaceae_unclassified	Bacteria	Actinobacteriota	Actinobacteria	Frankiales	Sporichthyaceae	unclassified	unclassified
OTU984	yes	yes	yes	group_JulFL_vs_JulPA	18	0	6.64734	1.11152e-16	Actinobacteriota	Actinobacteria	Frankiales	Sporichthyaceae	Sporichthyaceae_unclassified	Bacteria	Actinobacteriota	Actinobacteria	Frankiales	Sporichthyaceae	hgcI_clade	unclassified
OTU994	no	yes	no	group_JulFL_vs_JulPA	2	0	3.78641	0.000156028	Actinobacteriota	Actinobacteria	Frankiales	Sporichthyaceae	Sporichthyaceae_unclassified	Bacteria	Actinobacteriota	Actinobacteria	Frankiales	Sporichthyaceae	unclassified	unclassified
OTU1215	no	no	no	group_JulFL_vs_JulPA	2	0	3.47058	0.00918344	Actinobacteriota	Actinobacteria	Frankiales	Sporichthyaceae	Sporichthyaceae_unclassified	Bacteria	Actinobacteriota	Actinobacteria	Frankiales	Sporichthyaceae	unclassified	unclassified
OTU1536	no	no	no	group_JulFL_vs_JulPA	2	0	3.49881	0.00488591	Actinobacteriota	Actinobacteria	Frankiales	Sporichthyaceae	Sporichthyaceae_unclassified	Bacteria	Actinobacteriota	Actinobacteria	Frankiales	Sporichthyaceae	hgcI_clade	unclassified
OTU2171	no	yes	no	group_JulFL_vs_JulPA	2	0	3.34059	0.00205326	Actinobacteriota	Actinobacteria	Frankiales	Sporichthyaceae	Sporichthyaceae_unclassified	Bacteria	Actinobacteriota	Actinobacteria	Frankiales	Sporichthyaceae	hgcI_clade	unclassified
OTU2769	no	no	no	group_JulFL_vs_JulPA	2	0	3.78382	0.000344891	Actinobacteriota	Actinobacteria	Frankiales	Sporichthyaceae	Sporichthyaceae_unclassified	Bacteria	Actinobacteriota	Actinobacteria	Frankiales	Sporichthyaceae	Candidatus_Planktophila	unclassified
OTU113	no	no	no	group_JulFL_vs_JulPA	23	1	3.88746	5.35207e-09	Actinobacteriota	Actinobacteria	PeM15	PeM15_fa	PeM15_ge	Bacteria	Actinobacteriota	Actinobacteria	PeM15	unclassified	unclassified	unclassified
OTU162	no	yes	no	group_JulFL_vs_JulPA	0	5	-3.40479	0.00241928	Actinobacteriota	Actinobacteria	Propionibacteriales	Propionibacteriaceae	Cutibacterium	Bacteria	Actinobacteriota	Actinobacteria	Propionibacteriales	Propionibacteriaceae	Cutibacterium	unclassified
OTU207	no	no	no	group_JulFL_vs_JulPA	0	9	-3.95852	1.82314e-05	Actinobacteriota	Actinobacteria	uncultured	uncultured_fa	uncultured_ge	Bacteria	Actinobacteriota	Actinobacteria	unclassified	unclassified	unclassified	unclassified
OTU1151	no	no	no	group_JulFL_vs_JulPA	1	0	3.42989	0.00451223	Actinobacteriota	Actinobacteriota_unclassified	Actinobacteriota_unclassified	Actinobacteriota_unclassified	Actinobacteriota_unclassified	Bacteria	Actinobacteriota	unclassified	unclassified	unclassified	unclassified	unclassified
OTU103	yes	no	no	group_JulFL_vs_JulPA	35	1	5.01595	1.16128e-11	Actinobacteriota	Thermoleophilia	Gaiellales	uncultured	uncultured_ge	Bacteria	Actinobacteriota	Thermoleophilia	Gaiellales	unclassified	unclassified	unclassified
OTU155	no	no	no	group_JulFL_vs_JulPA	19	0	5.41629	1.76966e-10	Actinobacteriota	Thermoleophilia	Gaiellales	uncultured	uncultured_ge	Bacteria	Actinobacteriota	Thermoleophilia	Gaiellales	unclassified	unclassified	unclassified
OTU218	no	no	no	group_JulFL_vs_JulPA	1	8	-2.20696	0.00813683	Bacteria_unclassified	Bacteria_unclassified	Bacteria_unclassified	Bacteria_unclassified	Bacteria_unclassified	Bacteria	unclassified	unclassified	unclassified	unclassified	unclassified	unclassified
OTU116	yes	no	no	group_JulFL_vs_JulPA	0	32	-5.69541	7.02354e-14	Bacteroidota	Bacteroidia	Bacteroidia_unclassified	Bacteroidia_unclassified	Bacteroidia_unclassified	Bacteria	Bacteroidota	Bacteroidia	unclassified	unclassified	unclassified	unclassified
OTU159	no	no	no	group_JulFL_vs_JulPA	0	24	-7.09065	3.51923e-05	Bacteroidota	Bacteroidia	Bacteroidia_unclassified	Bacteroidia_unclassified	Bacteroidia_unclassified	Bacteria	Bacteroidota	Bacteroidia	unclassified	unclassified	unclassified	unclassified
OTU340	no	no	no	group_JulFL_vs_JulPA	3	0	3.50674	0.00480454	Bacteroidota	Bacteroidia	Chitinophagales	Chitinophagaceae	Dinghuibacter	Bacteria	Bacteroidota	Bacteroidia	Chitinophagales	bacI	unclassified	unclassified
OTU87	yes	no	no	group_JulFL_vs_JulPA	15	2	2.45548	0.000568578	Bacteroidota	Bacteroidia	Chitinophagales	Chitinophagaceae	Ferruginibacter	Bacteria	Bacteroidota	Bacteroidia	Chitinophagales	Chitinophagaceae	Ferruginibacter	unclassified
OTU53	yes	no	no	group_JulFL_vs_JulPA	57	2	4.44727	2.33341e-09	Bacteroidota	Bacteroidia	Chitinophagales	Chitinophagaceae	Sediminibacterium	Bacteria	Bacteroidota	Bacteroidia	Chitinophagales	bacI	bacI-A	bacI-A1
OTU151	no	no	no	group_JulFL_vs_JulPA	1	11	-3.14004	7.77965e-05	Bacteroidota	Bacteroidia	Chitinophagales	Saprospiraceae	Candidatus_Aquirestis	Bacteria	Bacteroidota	Bacteroidia	Chitinophagales	bacIV	bacIV-B	Aquir
OTU418	no	no	no	group_JulFL_vs_JulPA	0	4	-4.3429	0.00307143	Bacteroidota	Bacteroidia	Chitinophagales	Saprospiraceae	uncultured	Bacteria	Bacteroidota	Bacteroidia	Chitinophagales	Saprospiraceae	unclassified	unclassified
OTU99	no	no	no	group_JulFL_vs_JulPA	32	1	4.47495	3.94722e-10	Bacteroidota	Bacteroidia	Cytophagales	Cyclobacteriaceae	Algoriphagus	Bacteria	Bacteroidota	Bacteroidia	Cytophagales	bacIII	bacIII-B	Algor
OTU195	no	no	no	group_JulFL_vs_JulPA	0	16	-5.17033	0.00970564	Bacteroidota	Bacteroidia	Cytophagales	Cytophagaceae	Cytophaga	Bacteria	Bacteroidota	Bacteroidia	Cytophagales	Cytophagaceae	Cytophaga	unclassified
OTU282	no	no	no	group_JulFL_vs_JulPA	0	8	-4.78814	1.53855e-05	Bacteroidota	Bacteroidia	Cytophagales	Cytophagaceae	Cytophaga	Bacteria	Bacteroidota	Bacteroidia	Cytophagales	Cytophagaceae	Cytophaga	unclassified
OTU75	yes	no	no	group_JulFL_vs_JulPA	7	118	-3.98327	0.000732337	Bacteroidota	Bacteroidia	Cytophagales	Spirosomaceae	Arcicella	Bacteria	Bacteroidota	Bacteroidia	Cytophagales	bacIII	bacIII-A	Flecto
OTU239	no	no	no	group_JulFL_vs_JulPA	0	9	-5.14802	9.29053e-07	Bacteroidota	Bacteroidia	Cytophagales	Spirosomaceae	Lacihabitans	Bacteria	Bacteroidota	Bacteroidia	Cytophagales	Spirosomaceae	Lacihabitans	unclassified
OTU37	yes	no	no	group_JulFL_vs_JulPA	32	1	5.00189	1.71666e-09	Bacteroidota	Bacteroidia	Cytophagales	Spirosomaceae	Pseudarcicella	Bacteria	Bacteroidota	Bacteroidia	Cytophagales	bacIII	bacIII-A	unclassified
OTU31	yes	no	no	group_JulFL_vs_JulPA	121	20	2.57136	0.000132245	Bacteroidota	Bacteroidia	Flavobacteriales	Crocinitomicaceae	Fluviicola	Bacteria	Bacteroidota	Bacteroidia	Flavobacteriales	bacV	unclassified	unclassified
OTU2998	no	no	no	group_JulFL_vs_JulPA	4	0	3.4484	0.00114253	Bacteroidota	Bacteroidia	Flavobacteriales	Crocinitomicaceae	Fluviicola	Bacteria	Bacteroidota	Bacteroidia	Flavobacteriales	Crocinitomicaceae	Fluviicola	unclassified
OTU250	no	no	no	group_JulFL_vs_JulPA	4	0	4.23123	6.92942e-05	Bacteroidota	Bacteroidia	Flavobacteriales	Cryomorphaceae	uncultured	Bacteria	Bacteroidota	Bacteroidia	Flavobacteriales	Cryomorphaceae	unclassified	unclassified
OTU41	yes	no	no	group_JulFL_vs_JulPA	7	62	-3.13064	0.000152494	Bacteroidota	Bacteroidia	Flavobacteriales	Flavobacteriaceae	Flavobacterium	Bacteria	Bacteroidota	Bacteroidia	Flavobacteriales	bacII	bacII-A	Flavo-A3
OTU47	yes	no	no	group_JulFL_vs_JulPA	4	210	-5.659	4.4131e-19	Bacteroidota	Bacteroidia	Flavobacteriales	Flavobacteriaceae	Flavobacterium	Bacteria	Bacteroidota	Bacteroidia	Flavobacteriales	Flavobacteriaceae	Flavobacterium	unclassified
OTU60	yes	no	no	group_JulFL_vs_JulPA	1	158	-6.86512	1.20547e-30	Bacteroidota	Bacteroidia	Flavobacteriales	Flavobacteriaceae	Flavobacterium	Bacteria	Bacteroidota	Bacteroidia	Flavobacteriales	Flavobacteriaceae	Flavobacterium	unclassified
OTU76	yes	no	no	group_JulFL_vs_JulPA	0	59	-7.0251	5.41268e-18	Bacteroidota	Bacteroidia	Flavobacteriales	Flavobacteriaceae	Flavobacterium	Bacteria	Bacteroidota	Bacteroidia	Flavobacteriales	Flavobacteriaceae	Flavobacterium	unclassified
OTU79	yes	no	no	group_JulFL_vs_JulPA	1	16	-3.55454	0.00132576	Bacteroidota	Bacteroidia	Flavobacteriales	Flavobacteriaceae	Flavobacterium	Bacteria	Bacteroidota	Bacteroidia	Flavobacteriales	Flavobacteriaceae	Flavobacterium	unclassified
OTU92	yes	no	no	group_JulFL_vs_JulPA	0	10	-4.30412	9.78244e-06	Bacteroidota	Bacteroidia	Flavobacteriales	Flavobacteriaceae	Flavobacterium	Bacteria	Bacteroidota	Bacteroidia	Flavobacteriales	bacII	bacII-A	unclassified
OTU107	yes	no	no	group_JulFL_vs_JulPA	0	25	-5.54613	4.90132e-09	Bacteroidota	Bacteroidia	Flavobacteriales	Flavobacteriaceae	Flavobacterium	Bacteria	Bacteroidota	Bacteroidia	Flavobacteriales	bacII	bacII-A	unclassified
OTU138	yes	no	no	group_JulFL_vs_JulPA	2	58	-4.36841	0.000247388	Bacteroidota	Bacteroidia	Flavobacteriales	Flavobacteriaceae	Flavobacterium	Bacteria	Bacteroidota	Bacteroidia	Flavobacteriales	Flavobacteriaceae	Flavobacterium	unclassified
OTU181	yes	no	no	group_JulFL_vs_JulPA	1	29	-4.25674	1.83387e-09	Bacteroidota	Bacteroidia	Flavobacteriales	Flavobacteriaceae	Flavobacterium	Bacteria	Bacteroidota	Bacteroidia	Flavobacteriales	bacII	bacII-A	unclassified
OTU558	no	no	no	group_JulFL_vs_JulPA	1	18	-4.18345	0.000183842	Bacteroidota	Bacteroidia	Flavobacteriales	Flavobacteriaceae	Flavobacterium	Bacteria	Bacteroidota	Bacteroidia	Flavobacteriales	bacII	bacII-A	Flavo-A3
OTU618	no	no	no	group_JulFL_vs_JulPA	0	3	-4.33655	0.00032131	Bacteroidota	Bacteroidia	Flavobacteriales	Flavobacteriaceae	Flavobacterium	Bacteria	Bacteroidota	Bacteroidia	Flavobacteriales	Flavobacteriaceae	Flavobacterium	unclassified
OTU1769	no	no	no	group_JulFL_vs_JulPA	0	6	-4.79926	9.41865e-06	Bacteroidota	Bacteroidia	Flavobacteriales	Flavobacteriaceae	Flavobacterium	Bacteria	Bacteroidota	Bacteroidia	Flavobacteriales	Flavobacteriaceae	Flavobacterium	unclassified
OTU3159	no	no	no	group_JulFL_vs_JulPA	0	2	-3.75286	0.00176988	Bacteroidota	Bacteroidia	Flavobacteriales	Flavobacteriaceae	Flavobacterium	Bacteria	Bacteroidota	Bacteroidia	Flavobacteriales	Flavobacteriaceae	Flavobacterium	unclassified
OTU127	yes	no	no	group_JulFL_vs_JulPA	0	24	-5.29949	1.32373e-10	Bacteroidota	Bacteroidia	Flavobacteriales	NS9_marine_group	NS9_marine_group_ge	Bacteria	Bacteroidota	Bacteroidia	Flavobacteriales	NS9_marine_group	unclassified	unclassified
OTU169	no	no	no	group_JulFL_vs_JulPA	0	14	-4.52007	4.89356e-07	Bacteroidota	Bacteroidia	Sphingobacteriales	env.OPS_17	env.OPS_17_ge	Bacteria	Bacteroidota	Bacteroidia	Sphingobacteriales	env.OPS_17	unclassified	unclassified
OTU291	no	no	no	group_JulFL_vs_JulPA	0	8	-4.98528	1.0338e-05	Bacteroidota	Bacteroidia	Sphingobacteriales	env.OPS_17	env.OPS_17_ge	Bacteria	Bacteroidota	Bacteroidia	Sphingobacteriales	env.OPS_17	unclassified	unclassified
OTU137	no	no	no	group_JulFL_vs_JulPA	6	0	2.98797	0.00297011	Bacteroidota	Bacteroidia	Sphingobacteriales	NS11-12_marine_group	NS11-12_marine_group_ge	Bacteria	Bacteroidota	Bacteroidia	Sphingobacteriales	NS11-12_marine_group	unclassified	unclassified
OTU522	no	no	no	group_JulFL_vs_JulPA	6	0	4.14806	6.29341e-05	Bacteroidota	Bacteroidia	Sphingobacteriales	NS11-12_marine_group	NS11-12_marine_group_ge	Bacteria	Bacteroidota	Bacteroidia	Sphingobacteriales	NS11-12_marine_group	unclassified	unclassified
OTU252	no	no	no	group_JulFL_vs_JulPA	7	0	5.18415	5.03419e-08	Bacteroidota	Bacteroidia	Sphingobacteriales	Sphingobacteriaceae	Pedobacter	Bacteria	Bacteroidota	Bacteroidia	Sphingobacteriales	bacVI	bacVI-B	Pedo
OTU375	no	no	no	group_JulFL_vs_JulPA	4	0	4.70185	0.00114253	Bacteroidota	Kryptonia	Kryptoniales	BSV26	BSV26_ge	Bacteria	Bacteroidota	Kryptonia	Kryptoniales	BSV26	unclassified	unclassified
OTU186	no	no	no	group_JulFL_vs_JulPA	16	0	4.22027	1.73828e-07	Chloroflexi	Anaerolineae	Anaerolineales	Anaerolineaceae	uncultured	Bacteria	Chloroflexi	Anaerolineae	Anaerolineales	Anaerolineaceae	unclassified	unclassified
OTU141	no	no	no	group_JulFL_vs_JulPA	0	24	-4.9492	1.82314e-05	Chloroflexi	Anaerolineae	Caldilineales	Caldilineaceae	uncultured	Bacteria	Chloroflexi	Anaerolineae	Caldilineales	Caldilineaceae	unclassified	unclassified
OTU29	yes	no	no	group_JulFL_vs_JulPA	293	4	5.9225	8.39627e-17	Crenarchaeota	Nitrososphaeria	Nitrosopumilales	Nitrosopumilaceae	Nitrosarchaeum	Archaea	Crenarchaeota	Nitrososphaeria	Nitrosopumilales	Nitrosopumilaceae	Nitrosarchaeum	unclassified
OTU4	yes	yes	yes	group_JulFL_vs_JulPA	569	5	6.82558	4.4131e-19	Crenarchaeota	Nitrososphaeria	Nitrosopumilales	Nitrosopumilaceae	Nitrosopumilaceae_unclassified	Archaea	Crenarchaeota	Nitrososphaeria	Nitrosopumilales	Nitrosopumilaceae	unclassified	unclassified
OTU445	no	no	no	group_JulFL_vs_JulPA	15	0	6.16936	0.00017303	Crenarchaeota	Nitrososphaeria	Nitrosopumilales	Nitrosopumilaceae	Nitrosopumilaceae_unclassified	Archaea	Crenarchaeota	Nitrososphaeria	Nitrosopumilales	Nitrosopumilaceae	unclassified	unclassified
OTU255	no	no	no	group_JulFL_vs_JulPA	0	11	-5.45701	0.000804535	Cyanobacteria	Cyanobacteriia	Cyanobacteriales	Phormidiaceae	Tychonema_CCAP_1459-11B	Bacteria	Cyanobacteria	Cyanobacteriia	Cyanobacteriales	Phormidiaceae	Tychonema_CCAP_1459-11B	unclassified
OTU166	no	no	no	group_JulFL_vs_JulPA	0	18	-6.38207	1.08828e-11	Cyanobacteria	Cyanobacteriia	Cyanobacteriia_unclassified	Cyanobacteriia_unclassified	Cyanobacteriia_unclassified	Bacteria	Cyanobacteria	Cyanobacteriia	unclassified	unclassified	unclassified	unclassified
OTU11	yes	yes	yes	group_JulFL_vs_JulPA	99	753	-2.92527	3.25602e-07	Cyanobacteria	Cyanobacteriia	Synechococcales	Cyanobiaceae	Cyanobium_PCC-6307	Bacteria	Cyanobacteria	Cyanobacteriia	Synechococcales	Cyanobiaceae	Cyanobium_PCC-6307	unclassified
OTU20	yes	no	no	group_JulFL_vs_JulPA	93	8	3.50422	5.35207e-09	Cyanobacteria	Cyanobacteriia	Synechococcales	Cyanobiaceae	Cyanobium_PCC-6307	Bacteria	Cyanobacteria	Cyanobacteriia	Synechococcales	Cyanobiaceae	Cyanobium_PCC-6307	unclassified
OTU101	yes	yes	yes	group_JulFL_vs_JulPA	290	11	4.69819	1.35382e-19	Cyanobacteria	Cyanobacteriia	Synechococcales	Cyanobiaceae	Cyanobium_PCC-6307	Bacteria	Cyanobacteria	Cyanobacteriia	Synechococcales	Cyanobiaceae	Cyanobium_PCC-6307	unclassified
OTU174	no	yes	no	group_JulFL_vs_JulPA	10	0	3.73946	1.6508e-06	Cyanobacteria	Cyanobacteriia	Synechococcales	Cyanobiaceae	Cyanobium_PCC-6307	Bacteria	Cyanobacteria	Cyanobacteriia	Synechococcales	Cyanobiaceae	Cyanobium_PCC-6307	unclassified
OTU188	yes	yes	yes	group_JulFL_vs_JulPA	7	0	5.28733	1.00967e-07	Cyanobacteria	Cyanobacteriia	Synechococcales	Cyanobiaceae	Cyanobium_PCC-6307	Bacteria	Cyanobacteria	Cyanobacteriia	Synechococcales	Cyanobiaceae	Cyanobium_PCC-6307	unclassified
OTU372	yes	yes	yes	group_JulFL_vs_JulPA	17	0	5.81871	2.83343e-10	Cyanobacteria	Cyanobacteriia	Synechococcales	Cyanobiaceae	Cyanobium_PCC-6307	Bacteria	Cyanobacteria	Cyanobacteriia	Synechococcales	Cyanobiaceae	Cyanobium_PCC-6307	unclassified
OTU652	no	no	no	group_JulFL_vs_JulPA	3	0	3.53775	0.0011966	Cyanobacteria	Cyanobacteriia	Synechococcales	Cyanobiaceae	Cyanobium_PCC-6307	Bacteria	Cyanobacteria	Cyanobacteriia	Synechococcales	Cyanobiaceae	Cyanobium_PCC-6307	unclassified
OTU697	no	no	no	group_JulFL_vs_JulPA	2	0	3.31886	0.00616703	Cyanobacteria	Cyanobacteriia	Synechococcales	Cyanobiaceae	Cyanobium_PCC-6307	Bacteria	Cyanobacteria	Cyanobacteriia	Synechococcales	Cyanobiaceae	Cyanobium_PCC-6307	unclassified
OTU765	no	yes	no	group_JulFL_vs_JulPA	9	0	5.44432	2.08613e-10	Cyanobacteria	Cyanobacteriia	Synechococcales	Cyanobiaceae	Cyanobium_PCC-6307	Bacteria	Cyanobacteria	Cyanobacteriia	Synechococcales	Cyanobiaceae	Cyanobium_PCC-6307	unclassified
OTU1121	no	yes	no	group_JulFL_vs_JulPA	4	0	4.65985	3.50567e-07	Cyanobacteria	Cyanobacteriia	Synechococcales	Cyanobiaceae	Cyanobium_PCC-6307	Bacteria	Cyanobacteria	Cyanobacteriia	Synechococcales	Cyanobiaceae	Cyanobium_PCC-6307	unclassified
OTU1364	no	no	no	group_JulFL_vs_JulPA	3	0	3.81638	0.000171985	Cyanobacteria	Cyanobacteriia	Synechococcales	Cyanobiaceae	Cyanobium_PCC-6307	Bacteria	Cyanobacteria	Cyanobacteriia	Synechococcales	Cyanobiaceae	Cyanobium_PCC-6307	unclassified
OTU1466	no	no	no	group_JulFL_vs_JulPA	3	0	3.96585	0.00118718	Cyanobacteria	Cyanobacteriia	Synechococcales	Cyanobiaceae	Cyanobium_PCC-6307	Bacteria	Cyanobacteria	Cyanobacteriia	Synechococcales	Cyanobiaceae	Cyanobium_PCC-6307	unclassified
OTU210	no	no	no	group_JulFL_vs_JulPA	0	13	-6.19293	1.49758e-10	Desulfobacterota	uncultured	uncultured_or	uncultured_fa	uncultured_ge	Bacteria	Desulfobacterota	unclassified	unclassified	unclassified	unclassified	unclassified
OTU203	no	no	no	group_JulFL_vs_JulPA	0	3	-3.30448	0.00270951	Firmicutes	Clostridia	Clostridiales	Clostridiaceae	Clostridium_sensu_stricto_13	Bacteria	Firmicutes	Clostridia	Clostridiales	Clostridiaceae	Clostridium_sensu_stricto_13	unclassified
OTU253	no	no	no	group_JulFL_vs_JulPA	0	9	-5.73488	4.87555e-10	Myxococcota	Polyangia	Nannocystales	Nannocystaceae	Nannocystis	Bacteria	Myxococcota	Polyangia	Nannocystales	Nannocystaceae	Nannocystis	unclassified
OTU386	no	no	no	group_JulFL_vs_JulPA	0	5	-4.6421	0.000539831	Myxococcota	Polyangia	Polyangiales	BIrii41	BIrii41_ge	Bacteria	Myxococcota	Polyangia	Polyangiales	BIrii41	unclassified	unclassified
OTU88	yes	no	no	group_JulFL_vs_JulPA	48	5	3.24767	1.07308e-05	Nitrospirota	Nitrospiria	Nitrospirales	Nitrospiraceae	Nitrospira	Bacteria	Nitrospirota	Nitrospiria	Nitrospirales	Nitrospiraceae	Nitrospira	unclassified
OTU212	no	no	no	group_JulFL_vs_JulPA	0	4	-2.43041	0.0094894	Patescibacteria	Saccharimonadia	Saccharimonadales	Saccharimonadales_unclassified	Saccharimonadales_unclassified	Bacteria	Patescibacteria	Saccharimonadia	Saccharimonadales	unclassified	unclassified	unclassified
OTU327	no	no	no	group_JulFL_vs_JulPA	0	4	-3.94303	0.000802247	Planctomycetota	OM190	OM190_or	OM190_fa	OM190_ge	Bacteria	Planctomycetota	OM190	unclassified	unclassified	unclassified	unclassified
OTU257	no	no	no	group_JulFL_vs_JulPA	0	4	-4.47943	6.49668e-05	Planctomycetota	Phycisphaerae	Phycisphaerales	Phycisphaeraceae	CL500-3	Bacteria	Planctomycetota	Phycisphaerae	Phycisphaerales	Phycisphaeraceae	CL500-3	unclassified
OTU54	yes	no	no	group_JulFL_vs_JulPA	144	7	4.27959	3.49723e-13	Planctomycetota	Planctomycetes	Gemmatales	Gemmataceae	uncultured	Bacteria	Planctomycetota	Planctomycetes	Gemmatales	Gemmataceae	unclassified	unclassified
OTU374	no	no	no	group_JulFL_vs_JulPA	0	4	-4.59887	0.00040164	Planctomycetota	Planctomycetes	Isosphaerales	Isosphaeraceae	Isosphaeraceae_unclassified	Bacteria	Planctomycetota	Planctomycetes	Isosphaerales	Isosphaeraceae	unclassified	unclassified
OTU133	yes	yes	yes	group_JulFL_vs_JulPA	0	19	-4.29069	6.98285e-09	Planctomycetota	Planctomycetes	Pirellulales	Pirellulaceae	Pirellula	Bacteria	Planctomycetota	Planctomycetes	Pirellulales	Pirellulaceae	Pirellula	unclassified
OTU198	no	no	no	group_JulFL_vs_JulPA	7	0	3.20275	0.000313663	Planctomycetota	Planctomycetes	Pirellulales	Pirellulaceae	uncultured	Bacteria	Planctomycetota	Planctomycetes	Pirellulales	Pirellulaceae	unclassified	unclassified
OTU228	no	no	no	group_JulFL_vs_JulPA	8	0	3.71116	0.00010283	Planctomycetota	Planctomycetes	Pirellulales	Pirellulaceae	uncultured	Bacteria	Planctomycetota	Planctomycetes	Pirellulales	Pirellulaceae	unclassified	unclassified
OTU74	yes	yes	yes	group_JulFL_vs_JulPA	4	141	-5.1223	9.47598e-23	Planctomycetota	Planctomycetes	Planctomycetales	Rubinisphaeraceae	uncultured	Bacteria	Planctomycetota	Planctomycetes	Planctomycetales	Rubinisphaeraceae	unclassified	unclassified
OTU170	no	no	no	group_JulFL_vs_JulPA	3	13	-1.9767	0.00705502	Planctomycetota	Planctomycetes	Planctomycetales	Schlesneriaceae	Schlesneria	Bacteria	Planctomycetota	Planctomycetes	Planctomycetales	Schlesneriaceae	Schlesneria	unclassified
OTU385	no	no	no	group_JulFL_vs_JulPA	4	0	4.22281	0.0035365	Planctomycetota	Planctomycetes	Planctomycetales	uncultured	uncultured_ge	Bacteria	Planctomycetota	Planctomycetes	Planctomycetales	unclassified	unclassified	unclassified
OTU125	no	no	no	group_JulFL_vs_JulPA	23	1	4.24145	4.08678e-10	Proteobacteria	Alphaproteobacteria	Acetobacterales	Acetobacteraceae	Acetobacteraceae_unclassified	Bacteria	Proteobacteria	Alphaproteobacteria	Acetobacterales	Acetobacteraceae	unclassified	unclassified
OTU1346	no	no	no	group_JulFL_vs_JulPA	3	0	3.51963	0.00952394	Proteobacteria	Alphaproteobacteria	Acetobacterales	Acetobacteraceae	Acetobacteraceae_unclassified	Bacteria	Proteobacteria	Alphaproteobacteria	Acetobacterales	Acetobacteraceae	unclassified	unclassified
OTU231	no	no	no	group_JulFL_vs_JulPA	1	9	-2.5596	0.00673608	Proteobacteria	Alphaproteobacteria	Alphaproteobacteria_unclassified	Alphaproteobacteria_unclassified	Alphaproteobacteria_unclassified	Bacteria	Proteobacteria	Alphaproteobacteria	unclassified	unclassified	unclassified	unclassified
OTU302	no	no	no	group_JulFL_vs_JulPA	6	0	4.28123	2.79861e-05	Proteobacteria	Alphaproteobacteria	Caulobacterales	Caulobacteraceae	Phenylobacterium	Bacteria	Proteobacteria	Alphaproteobacteria	Caulobacterales	Caulobacteraceae	Phenylobacterium	unclassified
OTU68	yes	yes	yes	group_JulFL_vs_JulPA	2	13	-2.4243	0.00217592	Proteobacteria	Alphaproteobacteria	Paracaedibacterales	Paracaedibacteraceae	uncultured	Bacteria	Proteobacteria	Alphaproteobacteria	Paracaedibacterales	Paracaedibacteraceae	unclassified	unclassified
OTU369	no	no	no	group_JulFL_vs_JulPA	3	0	3.95349	0.000441237	Proteobacteria	Alphaproteobacteria	Rhizobiales	Beijerinckiaceae	alphaI_cluster	Bacteria	Proteobacteria	Alphaproteobacteria	Rhizobiales	Beijerinckiaceae	alphaI_cluster	unclassified
OTU132	no	no	no	group_JulFL_vs_JulPA	15	1	3.78743	2.19083e-08	Proteobacteria	Alphaproteobacteria	Rhizobiales	Beijerinckiaceae	Beijerinckiaceae_unclassified	Bacteria	Proteobacteria	Alphaproteobacteria	Rhizobiales	alfI	alfI-B	unclassified
OTU268	no	no	no	group_JulFL_vs_JulPA	8	0	5.03905	3.92948e-07	Proteobacteria	Alphaproteobacteria	Rhizobiales	Beijerinckiaceae	Beijerinckiaceae_unclassified	Bacteria	Proteobacteria	Alphaproteobacteria	Rhizobiales	alfI	unclassified	unclassified
OTU144	no	no	no	group_JulFL_vs_JulPA	24	0	5.53758	8.86059e-11	Proteobacteria	Alphaproteobacteria	Rhizobiales	Xanthobacteraceae	uncultured	Bacteria	Proteobacteria	Alphaproteobacteria	Rhizobiales	Xanthobacteraceae	unclassified	unclassified
OTU63	yes	no	no	group_JulFL_vs_JulPA	1	25	-4.61917	3.42165e-05	Proteobacteria	Alphaproteobacteria	Rhodobacterales	Rhodobacteraceae	Pseudorhodobacter	Bacteria	Proteobacteria	Alphaproteobacteria	Rhodobacterales	alfVI	unclassified	unclassified
OTU112	no	yes	no	group_JulFL_vs_JulPA	27	1	4.82153	2.39225e-13	Proteobacteria	Alphaproteobacteria	Rhodobacterales	Rhodobacteraceae	Rhodobacter	Bacteria	Proteobacteria	Alphaproteobacteria	Rhodobacterales	alfVI	unclassified	unclassified
OTU194	no	no	no	group_JulFL_vs_JulPA	0	10	-5.37116	3.93541e-09	Proteobacteria	Alphaproteobacteria	Rhodobacterales	Rhodobacteraceae	Rhodobacter	Bacteria	Proteobacteria	Alphaproteobacteria	Rhodobacterales	Rhodobacteraceae	Rhodobacter	unclassified
OTU213	no	no	no	group_JulFL_vs_JulPA	11	0	5.43038	2.46898e-08	Proteobacteria	Alphaproteobacteria	SAR11_clade	Clade_I	Clade_I_unclassified	Bacteria	Proteobacteria	Alphaproteobacteria	SAR11_clade	Clade_I	unclassified	unclassified
OTU2	yes	yes	yes	group_JulFL_vs_JulPA	380	2	7.15508	3.59768e-24	Proteobacteria	Alphaproteobacteria	SAR11_clade	Clade_III	Clade_III_ge	Bacteria	Proteobacteria	Alphaproteobacteria	SAR11_clade	alfV	alfV-A	LD12
OTU95	yes	no	no	group_JulFL_vs_JulPA	22	3	2.79521	9.52074e-06	Proteobacteria	Alphaproteobacteria	Sphingomonadales	Sphingomonadaceae	Sphingorhabdus	Bacteria	Proteobacteria	Alphaproteobacteria	Sphingomonadales	alfIV	alfIV-B	Pyxis
OTU40	yes	no	no	group_JulFL_vs_JulPA	135	3	5.15439	2.13366e-19	Proteobacteria	Gammaproteobacteria	Burkholderiales	Alcaligenaceae	GKS98_freshwater_group	Bacteria	Proteobacteria	Gammaproteobacteria	Burkholderiales	betIII	betIII-A	betIII-A1
OTU612	no	yes	no	group_JulFL_vs_JulPA	13	0	5.1744	1.30198e-09	Proteobacteria	Gammaproteobacteria	Burkholderiales	Alcaligenaceae	GKS98_freshwater_group	Bacteria	Proteobacteria	Gammaproteobacteria	Burkholderiales	Alcaligenaceae	GKS98_freshwater_group	unclassified
OTU91	yes	yes	yes	group_JulFL_vs_JulPA	46	1	5.37132	3.60419e-18	Proteobacteria	Gammaproteobacteria	Burkholderiales	Burkholderiaceae	Polynucleobacter	Bacteria	Proteobacteria	Gammaproteobacteria	Burkholderiales	betII	Pnec	PnecB
OTU220	no	no	no	group_JulFL_vs_JulPA	9	0	3.28199	7.92689e-06	Proteobacteria	Gammaproteobacteria	Burkholderiales	Comamonadaceae	Comamonadaceae_unclassified	Bacteria	Proteobacteria	Gammaproteobacteria	Burkholderiales	Comamonadaceae	unclassified	unclassified
OTU225	no	no	no	group_JulFL_vs_JulPA	0	14	-6.02345	0.000386798	Proteobacteria	Gammaproteobacteria	Burkholderiales	Comamonadaceae	Comamonadaceae_unclassified	Bacteria	Proteobacteria	Gammaproteobacteria	Burkholderiales	Comamonadaceae	unclassified	unclassified
OTU484	no	no	no	group_JulFL_vs_JulPA	0	9	-4.97867	4.98361e-07	Proteobacteria	Gammaproteobacteria	Burkholderiales	Comamonadaceae	Comamonadaceae_unclassified	Bacteria	Proteobacteria	Gammaproteobacteria	Burkholderiales	betI	betI-B	Rhodo
OTU3301	no	no	no	group_JulFL_vs_JulPA	4	0	3.65467	0.000118639	Proteobacteria	Gammaproteobacteria	Burkholderiales	Comamonadaceae	Comamonadaceae_unclassified	Bacteria	Proteobacteria	Gammaproteobacteria	Burkholderiales	Comamonadaceae	unclassified	unclassified
OTU43	yes	yes	yes	group_JulFL_vs_JulPA	136	6	4.4809	6.23467e-13	Proteobacteria	Gammaproteobacteria	Burkholderiales	Comamonadaceae	Limnohabitans	Bacteria	Proteobacteria	Gammaproteobacteria	Burkholderiales	betI	betI-A	Lhab-A1
OTU66	yes	no	no	group_JulFL_vs_JulPA	5	64	-3.66386	1.457e-05	Proteobacteria	Gammaproteobacteria	Burkholderiales	Comamonadaceae	Rhodoferax	Bacteria	Proteobacteria	Gammaproteobacteria	Burkholderiales	Comamonadaceae	Rhodoferax	unclassified
OTU156	no	no	no	group_JulFL_vs_JulPA	0	9	-3.8996	0.00041052	Proteobacteria	Gammaproteobacteria	Burkholderiales	Comamonadaceae	Rhodoferax	Bacteria	Proteobacteria	Gammaproteobacteria	Burkholderiales	betI	betI-B	Rhodo
OTU248	no	yes	no	group_JulFL_vs_JulPA	11	0	4.69997	3.9916e-08	Proteobacteria	Gammaproteobacteria	Burkholderiales	Comamonadaceae	Rhodoferax	Bacteria	Proteobacteria	Gammaproteobacteria	Burkholderiales	betI	betI-B	Rhodo
OTU82	yes	no	no	group_JulFL_vs_JulPA	62	0	6.35946	1.84295e-13	Proteobacteria	Gammaproteobacteria	Burkholderiales	Methylophilaceae	Candidatus_Methylopumilus	Bacteria	Proteobacteria	Gammaproteobacteria	Burkholderiales	betIV	betIV-A	LD28
OTU362	no	no	no	group_JulFL_vs_JulPA	4	0	4.15102	0.000509747	Proteobacteria	Gammaproteobacteria	Burkholderiales	Nitrosomonadaceae	Nitrosospira	Bacteria	Proteobacteria	Gammaproteobacteria	Burkholderiales	Nitrosomonadaceae	Nitrosospira	unclassified
OTU236	no	no	no	group_JulFL_vs_JulPA	6	0	2.85126	0.00187465	Proteobacteria	Gammaproteobacteria	Burkholderiales	Oxalobacteraceae	Oxalobacteraceae_unclassified	Bacteria	Proteobacteria	Gammaproteobacteria	Burkholderiales	betVII	betVII-B	betVII-B1
OTU296	no	no	no	group_JulFL_vs_JulPA	6	0	3.9208	3.00611e-05	Proteobacteria	Gammaproteobacteria	Burkholderiales	TRA3-20	TRA3-20_ge	Bacteria	Proteobacteria	Gammaproteobacteria	Burkholderiales	TRA3-20	unclassified	unclassified
OTU322	no	no	no	group_JulFL_vs_JulPA	0	6	-5.10169	2.6513e-05	Proteobacteria	Gammaproteobacteria	Cellvibrionales	Halieaceae	OM60(NOR5)_clade	Bacteria	Proteobacteria	Gammaproteobacteria	Cellvibrionales	Halieaceae	OM60(NOR5)_clade	unclassified
OTU96	yes	no	no	group_JulFL_vs_JulPA	1	65	-5.28187	1.49346e-16	Proteobacteria	Gammaproteobacteria	Gammaproteobacteria_unclassified	Gammaproteobacteria_unclassified	Gammaproteobacteria_unclassified	Bacteria	Proteobacteria	Gammaproteobacteria	unclassified	unclassified	unclassified	unclassified
OTU136	no	no	no	group_JulFL_vs_JulPA	10	2	2.21618	0.00728043	Proteobacteria	Gammaproteobacteria	Legionellales	Legionellaceae	Legionella	Bacteria	Proteobacteria	Gammaproteobacteria	Legionellales	Legionellaceae	Legionella	unclassified
OTU30	yes	no	no	group_JulFL_vs_JulPA	428	10	5.40409	6.65547e-21	Proteobacteria	Gammaproteobacteria	Methylococcales	Methylomonadaceae	Crenothrix	Bacteria	Proteobacteria	Gammaproteobacteria	Methylococcales	Methylomonadaceae	Crenothrix	unclassified
OTU290	no	no	no	group_JulFL_vs_JulPA	0	6	-5.23432	0.00493048	Proteobacteria	Gammaproteobacteria	Methylococcales	Methylomonadaceae	Crenothrix	Bacteria	Proteobacteria	Gammaproteobacteria	Methylococcales	Methylomonadaceae	Crenothrix	unclassified
OTU90	yes	no	no	group_JulFL_vs_JulPA	15	3	2.20251	0.00743123	Proteobacteria	Gammaproteobacteria	Methylococcales	Methylomonadaceae	Methylobacter	Bacteria	Proteobacteria	Gammaproteobacteria	Methylococcales	Methylomonadaceae	Methylobacter	unclassified
OTU1340	no	no	no	group_JulFL_vs_JulPA	3	0	4.32621	0.00743123	Proteobacteria	Gammaproteobacteria	Methylococcales	Methylomonadaceae	Methylomonadaceae_unclassified	Bacteria	Proteobacteria	Gammaproteobacteria	Methylococcales	Methylomonadaceae	unclassified	unclassified
OTU32	yes	no	no	group_JulFL_vs_JulPA	294	18	4.02963	1.50306e-07	Proteobacteria	Gammaproteobacteria	Methylococcales	Methylomonadaceae	uncultured	Bacteria	Proteobacteria	Gammaproteobacteria	Methylococcales	Methylomonadaceae	unclassified	unclassified
OTU2376	no	no	no	group_JulFL_vs_JulPA	5	0	4.0595	0.0035365	Proteobacteria	Gammaproteobacteria	Methylococcales	Methylomonadaceae	uncultured	Bacteria	Proteobacteria	Gammaproteobacteria	Methylococcales	Methylomonadaceae	unclassified	unclassified
OTU2404	no	no	no	group_JulFL_vs_JulPA	20	0	6.02177	6.86086e-10	Proteobacteria	Gammaproteobacteria	Methylococcales	Methylomonadaceae	uncultured	Bacteria	Proteobacteria	Gammaproteobacteria	Methylococcales	Methylomonadaceae	unclassified	unclassified
OTU2987	no	no	no	group_JulFL_vs_JulPA	23	0	6.98789	3.62851e-08	Proteobacteria	Gammaproteobacteria	Methylococcales	Methylomonadaceae	uncultured	Bacteria	Proteobacteria	Gammaproteobacteria	Methylococcales	Methylomonadaceae	unclassified	unclassified
OTU326	no	no	no	group_JulFL_vs_JulPA	5	0	4.91388	1.19224e-06	Proteobacteria	Gammaproteobacteria	Oceanospirillales	Pseudohongiellaceae	Pseudohongiella	Bacteria	Proteobacteria	Gammaproteobacteria	Oceanospirillales	Pseudohongiellaceae	Pseudohongiella	unclassified
OTU73	yes	no	no	group_JulFL_vs_JulPA	105	8	3.7208	0.00182569	Proteobacteria	Gammaproteobacteria	Pseudomonadales	Moraxellaceae	Acinetobacter	Bacteria	Proteobacteria	Gammaproteobacteria	Pseudomonadales	Moraxellaceae	Acinetobacter	unclassified
OTU432	no	no	no	group_JulFL_vs_JulPA	0	3	-4.39756	0.00851301	Proteobacteria	Gammaproteobacteria	Pseudomonadales	Pseudomonadaceae	Pseudomonas	Bacteria	Proteobacteria	Gammaproteobacteria	Pseudomonadales	Pseudomonadaceae	Pseudomonas	unclassified
OTU310	no	no	no	group_JulFL_vs_JulPA	0	6	-3.62557	0.000921807	Proteobacteria	Gammaproteobacteria	Xanthomonadales	Rhodanobacteraceae	uncultured	Bacteria	Proteobacteria	Gammaproteobacteria	Xanthomonadales	Rhodanobacteraceae	unclassified	unclassified
OTU254	no	no	no	group_JulFL_vs_JulPA	0	9	-5.67189	1.39333e-08	Proteobacteria	Gammaproteobacteria	Xanthomonadales	Xanthomonadaceae	Arenimonas	Bacteria	Proteobacteria	Gammaproteobacteria	Xanthomonadales	Xanthomonadaceae	Arenimonas	unclassified
OTU279	no	no	no	group_JulFL_vs_JulPA	1	8	-2.76984	0.00953052	SAR324_clade(Marine_group_B)	SAR324_clade(Marine_group_B)_cl	SAR324_clade(Marine_group_B)_or	SAR324_clade(Marine_group_B)_fa	SAR324_clade(Marine_group_B)_ge	Bacteria	SAR324_clade(Marine_group_B)	unclassified	unclassified	unclassified	unclassified	unclassified
OTU217	no	no	no	group_JulFL_vs_JulPA	0	12	-6.04497	1.28489e-09	Verrucomicrobiota	Verrucomicrobiae	Chthoniobacterales	Chthoniobacteraceae	Chthoniobacter	Bacteria	Verrucomicrobiota	Verrucomicrobiae	Chthoniobacterales	Chthoniobacteraceae	Chthoniobacter	unclassified
OTU349	no	no	no	group_JulFL_vs_JulPA	0	5	-4.7216	3.64535e-05	Verrucomicrobiota	Verrucomicrobiae	Chthoniobacterales	Chthoniobacteraceae	Chthoniobacter	Bacteria	Verrucomicrobiota	Verrucomicrobiae	Chthoniobacterales	Chthoniobacteraceae	Chthoniobacter	unclassified
OTU3010	no	no	no	group_JulFL_vs_JulPA	0	4	-4.29901	0.00231875	Verrucomicrobiota	Verrucomicrobiae	Chthoniobacterales	Chthoniobacteraceae	Chthoniobacter	Bacteria	Verrucomicrobiota	Verrucomicrobiae	Chthoniobacterales	Chthoniobacteraceae	Chthoniobacter	unclassified
OTU246	no	no	no	group_JulFL_vs_JulPA	6	0	4.13061	0.00075059	Verrucomicrobiota	Verrucomicrobiae	Opitutales	Opitutaceae	Lacunisphaera	Bacteria	Verrucomicrobiota	Verrucomicrobiae	Opitutales	Opitutaceae	Lacunisphaera	unclassified
OTU224	no	no	no	group_JulFL_vs_JulPA	0	15	-6.1418	2.47349e-10	Verrucomicrobiota	Verrucomicrobiae	Pedosphaerales	Pedosphaeraceae	DEV114	Bacteria	Verrucomicrobiota	Verrucomicrobiae	Pedosphaerales	Pedosphaeraceae	DEV114	unclassified
OTU4027	no	no	no	group_JulFL_vs_JulPA	0	8	-4.77624	8.16614e-07	Verrucomicrobiota	Verrucomicrobiae	Pedosphaerales	Pedosphaeraceae	Pedosphaeraceae_unclassified	Bacteria	Verrucomicrobiota	Verrucomicrobiae	Pedosphaerales	Pedosphaeraceae	unclassified	unclassified
OTU438	no	no	no	group_JulFL_vs_JulPA	0	3	-4.10915	0.00466962	Verrucomicrobiota	Verrucomicrobiae	Pedosphaerales	Pedosphaeraceae	uncultured	Bacteria	Verrucomicrobiota	Verrucomicrobiae	Pedosphaerales	Pedosphaeraceae	unclassified	unclassified
OTU24	yes	yes	yes	group_JulFL_vs_JulPA	12	329	-4.69064	1.67229e-39	Verrucomicrobiota	Verrucomicrobiae	Verrucomicrobiales	Rubritaleaceae	Luteolibacter	Bacteria	Verrucomicrobiota	Verrucomicrobiae	Verrucomicrobiales	Rubritaleaceae	Luteolibacter	unclassified
OTU25	yes	no	no	group_JulFL_vs_JulPA	4	489	-6.82312	9.00557e-52	Verrucomicrobiota	Verrucomicrobiae	Verrucomicrobiales	Rubritaleaceae	Luteolibacter	Bacteria	Verrucomicrobiota	Verrucomicrobiae	Verrucomicrobiales	Rubritaleaceae	Luteolibacter	unclassified
OTU142	yes	no	no	group_JulFL_vs_JulPA	0	73	-8.37845	1.53876e-27	Verrucomicrobiota	Verrucomicrobiae	Verrucomicrobiales	Rubritaleaceae	Luteolibacter	Bacteria	Verrucomicrobiota	Verrucomicrobiae	Verrucomicrobiales	Rubritaleaceae	Luteolibacter	unclassified
OTU189	yes	no	no	group_JulFL_vs_JulPA	1	66	-5.61229	1.96152e-11	Verrucomicrobiota	Verrucomicrobiae	Verrucomicrobiales	Rubritaleaceae	Luteolibacter	Bacteria	Verrucomicrobiota	Verrucomicrobiae	Verrucomicrobiales	Rubritaleaceae	Luteolibacter	unclassified
OTU717	no	no	no	group_JulFL_vs_JulPA	0	5	-4.72228	0.000456773	Verrucomicrobiota	Verrucomicrobiae	Verrucomicrobiales	Rubritaleaceae	Luteolibacter	Bacteria	Verrucomicrobiota	Verrucomicrobiae	Verrucomicrobiales	Rubritaleaceae	Luteolibacter	unclassified
OTU84	yes	yes	yes	group_JulFL_vs_JulPA	0	98	-7.07059	1.90421e-19	Verrucomicrobiota	Verrucomicrobiae	Verrucomicrobiales	Verrucomicrobiaceae	uncultured	Bacteria	Verrucomicrobiota	Verrucomicrobiae	Verrucomicrobiales	Verrucomicrobiaceae	unclassified	unclassified
OTU274	no	no	no	group_JulFL_vs_JulPA	0	8	-5.50774	1.95324e-07	Verrucomicrobiota	Verrucomicrobiae	Verrucomicrobiales	Verrucomicrobiaceae	uncultured	Bacteria	Verrucomicrobiota	Verrucomicrobiae	Verrucomicrobiales	Verrucomicrobiaceae	unclassified	unclassified
Group and contrasts – a set of samples to be statistically tested for differential abundance; is_major – whether the OTU total relative abundance exceeds 0.1%; is_shared – whether OTU is differentially abundant between FL and PA across all three months; is_major_shared – both conditions are met; group1_mean/ group2_mean – mean normalized count of OTU for reference (first/ second) contrast (same f…

## Sheet: Selenga_shore
Table S4. Abundance of OTUs having significant differences between FL and PA communities at Selenga mouth stations
id	is_major	is_shared	is_major_shared	contrast	group1_mean	group2_mean	log2FoldChange	padj	slv_Phylum	slv_Class	slv_Order	slv_Family	slv_Genus	fw_kingdom	fw_phylum	fw_class	fw_order	fw_lineage	fw_clade	fw_tribe
OTU3	yes	yes	yes	group_FL_vs_PA	57	0	6.66464	0.000625933	Actinobacteriota	Actinobacteria	Frankiales	Sporichthyaceae	Sporichthyaceae_unclassified	Bacteria	Actinobacteriota	Actinobacteria	Frankiales	acI	acI-A	acI-A7
OTU93	yes	yes	yes	group_FL_vs_PA	19	0	6.58656	0.00316457	Actinobacteriota	Actinobacteria	Frankiales	Sporichthyaceae	Sporichthyaceae_unclassified	Bacteria	Actinobacteriota	Actinobacteria	Frankiales	acI	acI-A	acI-A1
OTU158	no	no	no	group_FL_vs_PA	70	3	4.1541	2.92965e-05	Actinobacteriota	Actinobacteria	Micrococcales	Microbacteriaceae	Rhodoluna	Bacteria	Actinobacteriota	Actinobacteria	Micrococcales	Luna1	Luna1-A	Luna1-A2
OTU431	no	no	no	group_FL_vs_PA	20	0	6.64186	0.00275127	Bacteroidota	Bacteroidia	Bacteroidales	Bacteroidaceae	Bacteroides	Bacteria	Bacteroidota	Bacteroidia	Bacteroidales	Bacteroidaceae	Bacteroides	unclassified
OTU199	no	no	no	group_FL_vs_PA	75	2	4.74565	8.01408e-06	Bacteroidota	Bacteroidia	Bacteroidales	Prevotellaceae	Prevotella	Bacteria	Bacteroidota	Bacteroidia	Bacteroidales	Prevotellaceae	Prevotella	unclassified
OTU53	yes	no	no	group_FL_vs_PA	17	0	6.39365	0.00593673	Bacteroidota	Bacteroidia	Chitinophagales	Chitinophagaceae	Sediminibacterium	Bacteria	Bacteroidota	Bacteroidia	Chitinophagales	bacI	bacI-A	bacI-A1
OTU482	no	no	no	group_FL_vs_PA	0	20	-6.96504	0.00164783	Bacteroidota	Bacteroidia	Cytophagales	Microscillaceae	OLB12	Bacteria	Bacteroidota	Bacteroidia	Cytophagales	Microscillaceae	OLB12	unclassified
OTU75	yes	no	no	group_FL_vs_PA	11	270	-4.55919	1.248e-18	Bacteroidota	Bacteroidia	Cytophagales	Spirosomaceae	Arcicella	Bacteria	Bacteroidota	Bacteroidia	Cytophagales	bacIII	bacIII-A	Flecto
OTU37	yes	no	no	group_FL_vs_PA	69	2	4.93437	1.42227e-05	Bacteroidota	Bacteroidia	Cytophagales	Spirosomaceae	Pseudarcicella	Bacteria	Bacteroidota	Bacteroidia	Cytophagales	bacIII	bacIII-A	unclassified
OTU5	yes	no	no	group_FL_vs_PA	497	59	3.05383	4.82939e-13	Bacteroidota	Bacteroidia	Flavobacteriales	Flavobacteriaceae	Flavobacterium	Bacteria	Bacteroidota	Bacteroidia	Flavobacteriales	bacII	bacII-A	Flavo-A2
OTU16	yes	no	no	group_FL_vs_PA	725	27	4.71232	6.00241e-31	Bacteroidota	Bacteroidia	Flavobacteriales	Flavobacteriaceae	Flavobacterium	Bacteria	Bacteroidota	Bacteroidia	Flavobacteriales	Flavobacteriaceae	Flavobacterium	unclassified
OTU34	yes	no	no	group_FL_vs_PA	413	11	5.12226	7.55119e-25	Bacteroidota	Bacteroidia	Flavobacteriales	Flavobacteriaceae	Flavobacterium	Bacteria	Bacteroidota	Bacteroidia	Flavobacteriales	bacII	bacII-A	unclassified
OTU41	yes	no	no	group_FL_vs_PA	628	24	4.66126	1.92791e-30	Bacteroidota	Bacteroidia	Flavobacteriales	Flavobacteriaceae	Flavobacterium	Bacteria	Bacteroidota	Bacteroidia	Flavobacteriales	bacII	bacII-A	Flavo-A3
OTU77	yes	no	no	group_FL_vs_PA	429	10	5.32304	1.78292e-26	Bacteroidota	Bacteroidia	Flavobacteriales	Flavobacteriaceae	Flavobacterium	Bacteria	Bacteroidota	Bacteroidia	Flavobacteriales	Flavobacteriaceae	Flavobacterium	unclassified
OTU85	yes	no	no	group_FL_vs_PA	118	9	3.62867	1.68244e-07	Bacteroidota	Bacteroidia	Flavobacteriales	Flavobacteriaceae	Flavobacterium	Bacteria	Bacteroidota	Bacteroidia	Flavobacteriales	bacII	bacII-A	unclassified
OTU92	yes	no	no	group_FL_vs_PA	261	12	4.39318	7.85003e-17	Bacteroidota	Bacteroidia	Flavobacteriales	Flavobacteriaceae	Flavobacterium	Bacteria	Bacteroidota	Bacteroidia	Flavobacteriales	bacII	bacII-A	unclassified
OTU107	yes	no	no	group_FL_vs_PA	69	6	3.477	0.000149824	Bacteroidota	Bacteroidia	Flavobacteriales	Flavobacteriaceae	Flavobacterium	Bacteria	Bacteroidota	Bacteroidia	Flavobacteriales	bacII	bacII-A	unclassified
OTU138	yes	no	no	group_FL_vs_PA	48	3	3.60382	0.00133045	Bacteroidota	Bacteroidia	Flavobacteriales	Flavobacteriaceae	Flavobacterium	Bacteria	Bacteroidota	Bacteroidia	Flavobacteriales	Flavobacteriaceae	Flavobacterium	unclassified
OTU281	no	no	no	group_FL_vs_PA	74	0	8.492	4.20983e-06	Bacteroidota	Bacteroidia	Flavobacteriales	Flavobacteriaceae	Flavobacterium	Bacteria	Bacteroidota	Bacteroidia	Flavobacteriales	Flavobacteriaceae	Flavobacterium	unclassified
OTU286	no	no	no	group_FL_vs_PA	28	0	7.08146	0.000740784	Bacteroidota	Bacteroidia	Flavobacteriales	Flavobacteriaceae	Flavobacterium	Bacteria	Bacteroidota	Bacteroidia	Flavobacteriales	Flavobacteriaceae	Flavobacterium	unclassified
OTU339	no	no	no	group_FL_vs_PA	41	0	7.62846	0.000113182	Bacteroidota	Bacteroidia	Flavobacteriales	Flavobacteriaceae	Flavobacterium	Bacteria	Bacteroidota	Bacteroidia	Flavobacteriales	Flavobacteriaceae	Flavobacterium	unclassified
OTU395	no	no	no	group_FL_vs_PA	78	0	7.12474	0.000141289	Bacteroidota	Bacteroidia	Flavobacteriales	Flavobacteriaceae	Flavobacterium	Bacteria	Bacteroidota	Bacteroidia	Flavobacteriales	Flavobacteriaceae	Flavobacterium	unclassified
OTU451	no	no	no	group_FL_vs_PA	61	0	8.20344	1.33861e-05	Bacteroidota	Bacteroidia	Flavobacteriales	Flavobacteriaceae	Flavobacterium	Bacteria	Bacteroidota	Bacteroidia	Flavobacteriales	Flavobacteriaceae	Flavobacterium	unclassified
OTU526	no	no	no	group_FL_vs_PA	31	0	7.22206	0.000414749	Bacteroidota	Bacteroidia	Flavobacteriales	Flavobacteriaceae	Flavobacterium	Bacteria	Bacteroidota	Bacteroidia	Flavobacteriales	Flavobacteriaceae	Flavobacterium	unclassified
OTU543	no	no	no	group_FL_vs_PA	26	1	4.56813	0.00971786	Bacteroidota	Bacteroidia	Flavobacteriales	Flavobacteriaceae	Flavobacterium	Bacteria	Bacteroidota	Bacteroidia	Flavobacteriales	Flavobacteriaceae	Flavobacterium	unclassified
OTU552	no	no	no	group_FL_vs_PA	38	1	4.51686	0.00164783	Bacteroidota	Bacteroidia	Flavobacteriales	Flavobacteriaceae	Flavobacterium	Bacteria	Bacteroidota	Bacteroidia	Flavobacteriales	bacII	bacII-A	Flavo-A3
OTU568	no	no	no	group_FL_vs_PA	48	0	7.86444	4.24768e-05	Bacteroidota	Bacteroidia	Flavobacteriales	Flavobacteriaceae	Flavobacterium	Bacteria	Bacteroidota	Bacteroidia	Flavobacteriales	Flavobacteriaceae	Flavobacterium	unclassified
OTU618	no	no	no	group_FL_vs_PA	46	0	7.80564	5.54068e-05	Bacteroidota	Bacteroidia	Flavobacteriales	Flavobacteriaceae	Flavobacterium	Bacteria	Bacteroidota	Bacteroidia	Flavobacteriales	Flavobacteriaceae	Flavobacterium	unclassified
OTU673	no	no	no	group_FL_vs_PA	48	0	7.87236	4.05805e-05	Bacteroidota	Bacteroidia	Flavobacteriales	Flavobacteriaceae	Flavobacterium	Bacteria	Bacteroidota	Bacteroidia	Flavobacteriales	Flavobacteriaceae	Flavobacterium	unclassified
OTU790	no	no	no	group_FL_vs_PA	30	0	7.1875	0.000465848	Bacteroidota	Bacteroidia	Flavobacteriales	Flavobacteriaceae	Flavobacterium	Bacteria	Bacteroidota	Bacteroidia	Flavobacteriales	Flavobacteriaceae	Flavobacterium	unclassified
OTU792	no	no	no	group_FL_vs_PA	21	0	6.66386	0.00275127	Bacteroidota	Bacteroidia	Flavobacteriales	Flavobacteriaceae	Flavobacterium	Bacteria	Bacteroidota	Bacteroidia	Flavobacteriales	Flavobacteriaceae	Flavobacterium	unclassified
OTU909	no	no	no	group_FL_vs_PA	17	0	6.4017	0.00567874	Bacteroidota	Bacteroidia	Flavobacteriales	Flavobacteriaceae	Flavobacterium	Bacteria	Bacteroidota	Bacteroidia	Flavobacteriales	bacII	bacII-A	unclassified
OTU978	no	no	no	group_FL_vs_PA	20	0	6.62326	0.00301584	Bacteroidota	Bacteroidia	Flavobacteriales	Flavobacteriaceae	Flavobacterium	Bacteria	Bacteroidota	Bacteroidia	Flavobacteriales	Flavobacteriaceae	Flavobacterium	unclassified
OTU1128	no	no	no	group_FL_vs_PA	31	0	7.23156	0.0004129	Bacteroidota	Bacteroidia	Flavobacteriales	Flavobacteriaceae	Flavobacterium	Bacteria	Bacteroidota	Bacteroidia	Flavobacteriales	Flavobacteriaceae	Flavobacterium	unclassified
OTU1178	no	no	no	group_FL_vs_PA	20	0	6.61571	0.00316457	Bacteroidota	Bacteroidia	Flavobacteriales	Flavobacteriaceae	Flavobacterium	Bacteria	Bacteroidota	Bacteroidia	Flavobacteriales	Flavobacteriaceae	Flavobacterium	unclassified
OTU1197	no	no	no	group_FL_vs_PA	17	0	6.42695	0.00548299	Bacteroidota	Bacteroidia	Flavobacteriales	Flavobacteriaceae	Flavobacterium	Bacteria	Bacteroidota	Bacteroidia	Flavobacteriales	Flavobacteriaceae	Flavobacterium	unclassified
OTU1469	no	no	no	group_FL_vs_PA	54	0	8.03018	2.5316e-05	Bacteroidota	Bacteroidia	Flavobacteriales	Flavobacteriaceae	Flavobacterium	Bacteria	Bacteroidota	Bacteroidia	Flavobacteriales	Flavobacteriaceae	Flavobacterium	unclassified
OTU1624	no	no	no	group_FL_vs_PA	15	0	6.24338	0.00900676	Bacteroidota	Bacteroidia	Flavobacteriales	Flavobacteriaceae	Flavobacterium	Bacteria	Bacteroidota	Bacteroidia	Flavobacteriales	Flavobacteriaceae	Flavobacterium	unclassified
OTU2495	no	no	no	group_FL_vs_PA	27	0	7.06869	0.000697354	Bacteroidota	Bacteroidia	Flavobacteriales	Flavobacteriaceae	Flavobacterium	Bacteria	Bacteroidota	Bacteroidia	Flavobacteriales	Flavobacteriaceae	Flavobacterium	unclassified
OTU2498	no	no	no	group_FL_vs_PA	39	0	7.56339	0.000124399	Bacteroidota	Bacteroidia	Flavobacteriales	Flavobacteriaceae	Flavobacterium	Bacteria	Bacteroidota	Bacteroidia	Flavobacteriales	Flavobacteriaceae	Flavobacterium	unclassified
OTU3118	no	no	no	group_FL_vs_PA	16	0	6.32241	0.00717188	Bacteroidota	Bacteroidia	Flavobacteriales	Flavobacteriaceae	Flavobacterium	Bacteria	Bacteroidota	Bacteroidia	Flavobacteriales	Flavobacteriaceae	Flavobacterium	unclassified
OTU3131	no	no	no	group_FL_vs_PA	21	0	6.69796	0.00273434	Bacteroidota	Bacteroidia	Flavobacteriales	Flavobacteriaceae	Flavobacterium	Bacteria	Bacteroidota	Bacteroidia	Flavobacteriales	Flavobacteriaceae	Flavobacterium	unclassified
OTU261	no	no	no	group_FL_vs_PA	45	3	3.7425	0.00149992	Campilobacterota	Campylobacteria	Campylobacterales	Arcobacteraceae	Arcobacter	Bacteria	Campilobacterota	Campylobacteria	Campylobacterales	Arcobacteraceae	Arcobacter	unclassified
OTU80	yes	no	no	group_FL_vs_PA	103	424	-2.03545	1.33861e-05	Firmicutes	Bacilli	Lactobacillales	Carnobacteriaceae	Trichococcus	Bacteria	Firmicutes	Bacilli	Lactobacillales	Carnobacteriaceae	Trichococcus	unclassified
OTU91	yes	yes	yes	group_FL_vs_PA	18	0	6.44823	0.00501648	Proteobacteria	Gammaproteobacteria	Burkholderiales	Burkholderiaceae	Polynucleobacter	Bacteria	Proteobacteria	Gammaproteobacteria	Burkholderiales	betII	Pnec	PnecB
OTU134	no	no	no	group_FL_vs_PA	113	0	7.64873	2.8792e-05	Proteobacteria	Gammaproteobacteria	Burkholderiales	Comamonadaceae	Comamonadaceae_unclassified	Bacteria	Proteobacteria	Gammaproteobacteria	Burkholderiales	Comamonadaceae	unclassified	unclassified
OTU242	no	no	no	group_FL_vs_PA	0	89	-6.66779	1.51683e-06	Proteobacteria	Gammaproteobacteria	Burkholderiales	Comamonadaceae	Comamonadaceae_unclassified	Bacteria	Proteobacteria	Gammaproteobacteria	Burkholderiales	Comamonadaceae	unclassified	unclassified
OTU1079	no	no	no	group_FL_vs_PA	25	0	6.91243	0.00127152	Proteobacteria	Gammaproteobacteria	Burkholderiales	Comamonadaceae	Comamonadaceae_unclassified	Bacteria	Proteobacteria	Gammaproteobacteria	Burkholderiales	Comamonadaceae	unclassified	unclassified
OTU457	no	no	no	group_FL_vs_PA	41	0	7.65469	9.02652e-05	Proteobacteria	Gammaproteobacteria	Burkholderiales	Comamonadaceae	Limnohabitans	Bacteria	Proteobacteria	Gammaproteobacteria	Burkholderiales	betI	unclassified	unclassified
OTU94	yes	no	no	group_FL_vs_PA	37	204	-2.44558	4.20983e-06	Proteobacteria	Gammaproteobacteria	Burkholderiales	Comamonadaceae	Polaromonas	Bacteria	Proteobacteria	Gammaproteobacteria	Burkholderiales	betI	betI-A	Lhab-A2
OTU271	no	no	no	group_FL_vs_PA	0	59	-6.06894	3.11843e-05	Proteobacteria	Gammaproteobacteria	Burkholderiales	Comamonadaceae	Sphaerotilus	Bacteria	Proteobacteria	Gammaproteobacteria	Burkholderiales	Comamonadaceae	Sphaerotilus	unclassified
OTU403	no	no	no	group_FL_vs_PA	0	32	-6.20551	0.00265373	Proteobacteria	Gammaproteobacteria	Burkholderiales	Rhodocyclaceae	Zoogloea	Bacteria	Proteobacteria	Gammaproteobacteria	Burkholderiales	Rhodocyclaceae	Zoogloea	unclassified
OTU115	yes	no	no	group_FL_vs_PA	0	227	-10.4498	6.44209e-10	Proteobacteria	Gammaproteobacteria	Thiotrichales	Thiotrichaceae	Thiothrix	Bacteria	Proteobacteria	Gammaproteobacteria	Thiotrichales	Thiotrichaceae	Thiothrix	unclassified
OTU148	yes	no	no	group_FL_vs_PA	0	145	-7.36635	1.2379e-08	Proteobacteria	Gammaproteobacteria	Thiotrichales	Thiotrichaceae	Thiothrix	Bacteria	Proteobacteria	Gammaproteobacteria	Thiotrichales	Thiotrichaceae	Thiothrix	unclassified
Group and contrasts – a set of samples to be statistically tested for differential abundance; is_major – whether the OTU total relative abundance exceeds 0.1%; is_shared – whether OTU is differentially abundant between FL and PA across all three months; is_major_shared – both conditions are met; group1_mean/ group2_mean – mean normalized count of OTU for reference (first/ second) contrast (same f…
