# Supplementary material
Source: MDPI journal article supplement (https://www.mdpi.com/1424-2818/15/4/572)
Supplement: s1 [file s1 › Table S5.xlsx]

## Sheet: ALDEx2_picrust2_EC_results
Metabolic functions of FL and PA communitiess based on EC database.
Predicted genes were enriched in the FL communities
EC	description	rab.all	rab.win.FL	rab.win.PA	diff.btw	diff.win	effect	overlap	we.ep	we.eBH	wi.ep	wi.eBH
EC:1.1.1.100	3-oxoacyl-[acyl-carrier-protein] reductase	9.13672	9.70706	8.17648	-1.4851	0.725061	-1.82476	0.053	1.10902e-13	1.73129e-12	1.33807e-11	1.99078e-10
EC:1.1.1.122	D-threo-aldose 1-dehydrogenase	0.793154	1.37638	-0.47504	-1.8397	1.16128	-1.44631	0.0598	5.17231e-10	4.80548e-09	5.98439e-11	6.21616e-10
EC:1.1.1.157	3-hydroxybutyryl-CoA dehydrogenase	6.45481	7.11516	5.43018	-1.73154	0.735558	-2.27825	0.00760005	3.80299e-19	2.02521e-17	4.33424e-16	3.47802e-14
EC:1.1.1.159	7-alpha-hydroxysteroid dehydrogenase	3.14281	4.92906	2.00713	-2.89442	1.02889	-2.59859	0.060188	3.82933e-16	8.58537e-15	1.60323e-11	2.41353e-10
EC:1.1.1.203	Uronate dehydrogenase	2.38617	2.79379	1.45929	-1.32988	0.915485	-1.31571	0.1074	6.55795e-09	5.30974e-08	1.78286e-08	1.21316e-07
EC:1.1.1.205	IMP dehydrogenase	7.7176	8.06868	6.6368	-1.38278	0.936064	-1.30445	0.0994	2.90563e-09	2.53248e-08	5.14765e-09	3.85804e-08
EC:1.1.1.264	L-idonate 5-dehydrogenase (NAD(P)(+))	2.01932	2.49254	0.452613	-1.9946	1.15237	-1.55781	0.063	8.30684e-11	8.99956e-10	7.67386e-11	7.65478e-10
EC:1.1.1.284	S-(hydroxymethyl)glutathione dehydrogenase	5.93982	6.82988	4.94607	-1.842	0.781838	-2.17384	0.0598	4.57242e-14	7.52402e-13	4.36309e-11	5.02486e-10
EC:1.1.1.303	Diacetyl reductase ((R)-acetoin forming)	3.26841	5.15834	1.78788	-3.46701	1.20444	-2.62731	0.0607878	1.20382e-14	2.12089e-13	3.05636e-11	4.02274e-10
EC:1.1.1.31	3-hydroxyisobutyrate dehydrogenase	6.65073	7.41501	6.02125	-1.39297	0.60687	-2.18971	0.0382	9.81652e-17	2.52115e-15	9.59569e-13	1.91148e-11
EC:1.1.1.310	(S)-sulfolactate dehydrogenase	1.52765	3.32287	-0.770905	-4.17993	1.73079	-2.24778	0.0368	4.22998e-17	1.18498e-15	8.78544e-13	1.77147e-11
EC:1.1.1.328	Nicotine blue oxidoreductase	4.03685	6.16351	2.021	-4.08917	1.12101	-3.20776	0.0589882	1.06933e-12	1.49791e-11	4.26261e-11	5.0701e-10
EC:1.1.1.38	Malate dehydrogenase (oxaloacetate-decarboxylating)	4.67627	6.56082	3.85695	-2.76782	0.813683	-3.14466	0.0645871	6.00613e-16	1.29592e-14	4.13772e-11	4.98513e-10
EC:1.1.1.381	3-hydroxy acid dehydrogenase	-1.02655	-0.0842477	-1.74423	-1.56655	1.26506	-1.11482	0.1182	5.96538e-07	2.44165e-06	1.20084e-07	6.34044e-07
EC:1.1.1.4	(R,R)-butanediol dehydrogenase	3.26723	5.15906	1.78981	-3.46993	1.22129	-2.63575	0.0628	1.22478e-14	2.15638e-13	3.06284e-11	4.02672e-10
EC:1.1.1.53	3-alpha(or 20-beta)-hydroxysteroid dehydrogenase	2.8364	4.73187	1.27806	-3.39903	1.0921	-2.79548	0.0641872	4.23374e-12	5.44098e-11	5.06313e-11	5.5809e-10
EC:1.1.1.57	Fructuronate reductase	1.75218	2.38581	0.69304	-1.54254	1.04514	-1.38647	0.069986	1.47892e-10	1.52896e-09	1.80416e-10	1.62583e-09
EC:1.1.1.83	D-malate dehydrogenase (decarboxylating)	3.57906	3.9089	2.5801	-1.36197	0.905948	-1.36134	0.10138	2.86193e-09	2.48711e-08	5.89821e-09	4.39946e-08
EC:1.1.1.90	Aryl-alcohol dehydrogenase	2.71291	4.73512	1.24306	-3.46127	1.15012	-2.73244	0.0661868	7.50924e-12	9.34076e-11	5.86419e-11	6.10029e-10
EC:1.1.1.93	Tartrate dehydrogenase	3.57893	3.91001	2.58357	-1.35821	0.915566	-1.34592	0.101	2.81675e-09	2.44523e-08	5.75334e-09	4.29845e-08
EC:1.1.2.3	L-lactate dehydrogenase (cytochrome)	4.76035	6.77744	3.53638	-3.24426	0.7603	-3.9165	0.00499908	7.6988e-25	2.58785e-22	1.86907e-16	2.15084e-14
EC:1.1.2.4	D-lactate dehydrogenase (cytochrome)	3.71112	4.14282	2.13973	-2.11261	1.01238	-2.01782	0.00940004	8.28221e-16	1.66785e-14	1.99027e-15	9.82903e-14
EC:1.1.3.6	Cholesterol oxidase	2.65853	3.65402	0.993857	-2.85733	1.43405	-1.98219	0.014997	5.4108e-17	1.48335e-15	5.71589e-15	2.32399e-13
EC:1.1.3.8	L-gulonolactone oxidase	2.73656	4.74228	1.28751	-3.44872	1.24306	-2.47459	0.0617876	2.51569e-10	2.56943e-09	5.49082e-11	5.84536e-10
EC:1.1.5.3	Glycerol-3-phosphate dehydrogenase	5.28347	6.70098	4.81522	-1.89912	0.524111	-3.49772	0.0256	2.26663e-21	1.98054e-19	1.29325e-13	3.36812e-12
EC:1.1.99.1	Choline dehydrogenase	5.41152	6.39619	3.60307	-2.6765	0.792781	-3.19094	0.00219975	9.6894e-23	1.19357e-20	2.90141e-17	7.66722e-15
EC:1.13.11.9	2,5-dihydroxypyridine 5,6-dioxygenase	-0.442617	0.894526	-1.45836	-2.22107	1.62908	-1.19955	0.133373	3.6256e-08	2.45659e-07	1.49161e-07	8.37725e-07
EC:1.14.11.17	Taurine dioxygenase	4.92704	5.58172	3.12891	-2.36423	0.652587	-3.46808	1.40363e-05	1.6567e-23	2.59571e-21	8.59423e-18	6.6272e-15
EC:1.14.11.33	DNA oxidative demethylase	1.89818	2.49523	1.31099	-1.12648	0.886132	-1.17191	0.1164	2.78429e-08	2.00557e-07	7.94214e-08	4.67192e-07
EC:1.14.11.47	50S ribosomal protein L16 3-hydroxylase	2.96094	3.78974	2.48882	-1.36675	1.27505	-1.0562	0.1086	1.54623e-08	1.19288e-07	1.64346e-08	1.11666e-07
EC:1.14.13.107	Limonene 1,2-monooxygenase	2.73504	4.74046	1.06834	-3.64294	1.30121	-2.48304	0.0657868	1.89656e-09	1.68061e-08	6.13202e-11	6.264e-10
EC:1.14.13.149	Phenylacetyl-CoA 1,2-epoxidase	3.87493	4.25497	2.81953	-1.43606	1.05795	-1.28233	0.0602	3.56488e-10	3.57796e-09	5.93624e-11	6.24829e-10
EC:1.14.13.82	Vanillate monooxygenase	3.49822	3.76191	2.60246	-1.20138	1.11069	-1.02983	0.119576	1.53419e-06	8.33161e-06	4.97413e-08	3.12617e-07
EC:1.14.15.9	Spheroidene monooxygenase	-0.928375	1.29779	-2.82488	-3.84162	2.12294	-1.7687	0.0286	6.64703e-09	3.91231e-08	3.72155e-13	8.11274e-12
EC:1.14.19.2	Stearoyl-[acyl-carrier-protein] 9-desaturase	6.05414	6.61395	3.97492	-2.77723	1.33208	-2.03689	0.0169966	3.21564e-16	7.36799e-15	1.22755e-14	4.32984e-13
EC:1.17.1.1	CDP-4-dehydro-6-deoxyglucose reductase	3.49943	4.23929	2.6742	-1.55872	0.972794	-1.54646	0.0447911	1.9674e-12	2.62404e-11	2.61267e-12	4.73463e-11
EC:1.17.4.2	Ribonucleoside-triphosphate reductase	3.05776	3.75677	1.92955	-1.74303	1.43926	-1.10741	0.127574	6.5533e-08	4.58501e-07	1.08419e-07	6.40793e-07
EC:1.18.1.2	Ferredoxin--NADP(+) reductase	5.60319	6.48071	4.91267	-1.59137	0.614229	-2.35452	0.0516	7.40367e-16	1.56616e-14	1.70347e-11	2.40796e-10
EC:1.2.1.16	Succinate-semialdehyde dehydrogenase (NAD(P)(+))	6.38178	6.98293	5.42388	-1.67897	0.772378	-2.15199	0.00780005	1.44031e-18	6.32044e-17	6.1062e-16	4.47029e-14
EC:1.2.1.18	Malonate-semialdehyde dehydrogenase (acetylating)	4.76578	6.72875	4.09571	-2.64469	0.59518	-4.16925	0.00859833	2.05392e-23	3.43841e-21	4.85385e-16	3.81981e-14
EC:1.2.1.20	Glutarate-semialdehyde dehydrogenase	6.3755	6.98131	5.41963	-1.66635	0.763075	-2.16322	0.00999804	1.42963e-18	6.30459e-17	6.15519e-16	4.50608e-14
EC:1.2.1.27	Methylmalonate-semialdehyde dehydrogenase (CoA acylating)	4.76123	6.73135	4.0952	-2.63889	0.598712	-4.12889	0.00879829	2.04838e-23	3.40586e-21	4.80916e-16	3.79281e-14
EC:1.2.1.77	3,4-dehydroadipyl-CoA semialdehyde dehydrogenase (NADP(+))	-0.430601	0.848463	-2.22815	-2.85398	2.0701	-1.26642	0.10118	7.99496e-07	3.22699e-06	1.11554e-08	7.7787e-08
EC:1.2.1.79	Succinate-semialdehyde dehydrogenase (NADP(+))	6.37927	6.9816	5.41923	-1.67479	0.774	-2.16756	0.00780005	1.42918e-18	6.29892e-17	6.16e-16	4.49851e-14
EC:1.2.1.8	Betaine-aldehyde dehydrogenase	5.0743	6.68039	4.168	-2.53717	0.774441	-3.03126	0.0337933	4.50548e-19	2.41662e-17	3.09286e-13	7.16004e-12
EC:1.2.1.91	3-oxo-5,6-dehydrosuberyl-CoA semialdehyde dehydrogenase	2.10295	2.61069	1.0947	-1.55822	1.1951	-1.19928	0.0832	2.44345e-09	2.12065e-08	1.06788e-09	8.6098e-09
EC:1.2.7.11	2-oxoacid oxidoreductase (ferredoxin)	5.6553	7.41293	4.82716	-2.58124	0.849124	-2.87334	0.0645871	5.08078e-13	7.35169e-12	5.98654e-11	6.09887e-10
EC:1.2.7.3	2-oxoglutarate synthase	5.81651	7.43011	5.00369	-2.41335	0.817945	-2.76885	0.0671866	2.69009e-13	4.023e-12	6.06034e-11	6.15424e-10
EC:1.2.99.2	Carbon-monoxide dehydrogenase (acceptor)	6.18013	8.12023	5.29139	-2.84999	0.717259	-3.6729	0.0281944	6.41121e-21	5.17176e-19	1.70101e-13	4.28054e-12
EC:1.20.4.3	Mycoredoxin	1.10544	2.06773	-0.330073	-2.29437	1.46447	-1.35008	0.0876	2.41748e-09	2.06998e-08	1.49267e-09	1.19884e-08
EC:1.3.1.10	Enoyl-[acyl-carrier-protein] reductase (NADPH, Si-specific)	6.05535	7.02482	4.95216	-2.11347	0.716715	-2.65911	0.0197961	5.41878e-20	3.62441e-18	2.12909e-14	7.08995e-13
EC:1.3.1.14	Dihydroorotate dehydrogenase (NAD(+))	4.65367	6.6043	3.93292	-2.7696	0.924083	-2.83986	0.0596	5.33129e-15	9.92963e-14	2.83471e-11	3.81821e-10
EC:1.3.1.76	Precorrin-2 dehydrogenase	6.07133	6.83644	4.50922	-2.39748	0.711645	-3.0517	0.0248	6.00119e-20	3.97163e-18	9.91854e-14	2.69144e-12
EC:1.3.1.86	Crotonyl-CoA reductase	4.09623	6.2191	2.90889	-3.26851	1.14818	-2.65837	0.0663867	2.60088e-09	2.2797e-08	5.17318e-11	5.66195e-10
EC:1.3.1.98	UDP-N-acetylmuramate dehydrogenase	6.64233	7.28833	5.86803	-1.46265	0.717665	-1.96969	0.0325935	6.55057e-16	1.40648e-14	2.03335e-13	4.98025e-12
EC:1.3.3.11	Pyrroloquinoline-quinone synthase	2.02527	3.09257	1.02454	-1.95744	1.33191	-1.33749	0.1008	3.12997e-08	2.30702e-07	8.03629e-09	5.86468e-08
EC:1.3.3.4	Protoporphyrinogen oxidase	4.46173	6.27967	3.62664	-2.72275	0.949349	-2.65782	0.0643871	5.74041e-10	5.63305e-09	5.38207e-11	5.76041e-10
EC:1.3.8.12	(2S)-methylsuccinyl-CoA dehydrogenase	3.65622	5.00088	2.69555	-2.33057	1.03314	-2.13657	0.062	3.16616e-11	3.67182e-10	4.67886e-11	5.32005e-10
EC:1.3.8.7	Medium-chain acyl-CoA dehydrogenase	6.46894	7.51209	5.44088	-2.054	0.577888	-3.47398	0.00259964	9.15412e-27	9.27043e-24	2.91173e-17	7.65299e-15
EC:1.3.99.26	All-trans-zeta-carotene desaturase	6.2565	6.76952	4.30333	-2.58855	1.20774	-2.08063	0.0124	1.27438e-16	3.24019e-15	4.24608e-15	1.85466e-13
EC:1.3.99.27	1-hydroxycarotenoid 3,4-desaturase	0.0962564	1.51207	-0.486248	-1.98105	1.3743	-1.33395	0.10018	1.25916e-09	1.12006e-08	1.34511e-08	9.03516e-08
EC:1.3.99.28	Phytoene desaturase (neurosporene-forming)	6.25745	6.76682	4.30119	-2.57581	1.21439	-2.06698	0.0132	1.28697e-16	3.27435e-15	4.35578e-15	1.88228e-13
EC:1.3.99.29	Phytoene desaturase (zeta-carotene-forming)	6.25808	6.76667	4.30547	-2.59825	1.19645	-2.11509	0.0146	1.29876e-16	3.29765e-15	4.36537e-15	1.89017e-13
EC:1.3.99.31	Phytoene desaturase (lycopene-forming)	6.25684	6.76734	4.30612	-2.58631	1.21488	-2.06938	0.0146	1.25187e-16	3.19511e-15	4.19108e-15	1.83817e-13
EC:1.3.99.35	Chlorophyllide a reductase	1.51756	3.10052	0.806744	-2.26374	1.35881	-1.50234	0.0774	1.08627e-11	1.32227e-10	3.47041e-10	3.01145e-09
EC:1.4.1.1	Alanine dehydrogenase	6.71774	7.34621	5.88627	-1.49686	0.834677	-1.7172	0.0576	3.60934e-13	5.29919e-12	1.68893e-11	2.48524e-10
EC:1.4.1.13	Glutamate synthase (NADPH)	7.66851	8.04465	6.61895	-1.43361	0.791555	-1.62447	0.0736	2.63682e-12	3.51848e-11	3.10822e-10	2.7205e-09
EC:1.4.1.14	Glutamate synthase (NADH)	7.6681	8.045	6.61772	-1.42826	0.78649	-1.62269	0.0736	2.68827e-12	3.58034e-11	3.12625e-10	2.73316e-09
EC:1.4.1.21	Aspartate dehydrogenase	1.25573	2.58744	0.00418534	-2.5598	1.88294	-1.25465	0.0939812	1.14015e-08	8.40893e-08	4.32124e-09	3.26699e-08
EC:1.5.3.19	4-methylaminobutanoate oxidase (formaldehyde-forming)	1.49195	3.25443	-0.587041	-4.03796	1.87562	-2.02647	0.0404	5.29484e-16	1.11731e-14	2.58137e-12	4.69747e-11
EC:1.6.1.2	NAD(P)(+) transhydrogenase (Re/Si-specific)	7.03132	7.38879	6.24355	-1.10059	0.80556	-1.12911	0.13	1.21204e-07	8.09603e-07	2.17661e-07	1.2143e-06
EC:1.6.5.2	NAD(P)H dehydrogenase (quinone)	5.75988	6.73597	4.28205	-2.43697	0.597531	-3.63964	0.0542	1.81391e-18	7.75561e-17	1.09035e-11	1.73146e-10
EC:1.6.5.5	NADPH:quinone reductase	6.06982	7.14065	5.25092	-1.88651	0.532479	-3.41673	0.00340012	1.77275e-25	7.93331e-23	8.14733e-17	1.48331e-14
EC:1.7.1.13	PreQ(1) synthase	5.42388	5.91439	4.7801	-1.12183	0.665051	-1.51358	0.0815837	8.0786e-11	8.8355e-10	7.82228e-10	6.51342e-09
EC:1.7.1.15	Nitrite reductase (NADH)	5.31836	5.64409	4.74245	-0.961909	0.727574	-1.27284	0.0706	3.19979e-09	2.74409e-08	1.15148e-10	1.08861e-09
EC:1.8.1.15	Mycothione reductase	-2.23544	-4.39847	0.642372	5.21847	2.20269	2.32606	0.000800359	1.92467e-10	1.34721e-09	2.42357e-17	7.66341e-15
EC:1.8.1.4	Dihydrolipoyl dehydrogenase	8.10647	8.47986	7.16952	-1.28255	0.796912	-1.44909	0.0678	2.10408e-11	2.49031e-10	7.73444e-11	7.75291e-10
EC:1.8.1.9	Thioredoxin-disulfide reductase	7.76635	8.15621	6.98681	-1.0327	0.834905	-1.16026	0.121976	1.04235e-08	8.31082e-08	6.38827e-08	3.9332e-07
EC:1.8.7.1	Assimilatory sulfite reductase (ferredoxin)	6.19416	6.79815	5.0641	-1.71259	0.9115	-1.67482	0.0673865	5.22547e-11	5.89841e-10	7.05325e-11	7.1576e-10
EC:1.97.1.4	[Formate-C-acetyltransferase]-activating enzyme	4.58482	4.90673	3.92916	-1.10173	0.917679	-1.13638	0.0953809	1.28169e-08	1.00588e-07	4.86676e-09	3.64505e-08
EC:2.1.1.104	Caffeoyl-CoA O-methyltransferase	0.760416	1.83029	-0.174226	-2.02677	1.06355	-1.75364	0.0659868	8.42648e-07	4.55915e-06	8.51828e-11	8.23663e-10
EC:2.1.1.107	Uroporphyrinogen-III C-methyltransferase	7.63661	8.01475	6.65266	-1.22187	0.804738	-1.2719	0.1122	7.04734e-09	5.78639e-08	2.33417e-08	1.56133e-07
EC:2.1.1.148	Thymidylate synthase (FAD)	5.70343	6.20765	4.46813	-1.74315	1.18857	-1.21614	0.0796	7.78426e-07	4.51896e-06	5.4757e-10	4.65632e-09
EC:2.1.1.170	16S rRNA (guanine(527)-N(7))-methyltransferase	6.51536	7.07723	5.28899	-1.85015	0.819847	-2.14795	0.0126	5.07054e-18	1.8773e-16	2.03254e-15	1.05055e-13
EC:2.1.1.210	Demethylspheroidene O-methyltransferase	-0.0483844	1.51433	-0.803584	-2.25086	1.42301	-1.4424	0.0815837	6.01332e-11	6.24175e-10	7.99027e-10	6.46789e-09
EC:2.1.1.219	tRNA (adenine(57)-N(1)/adenine(58)-N(1))-methyltransferase	4.46795	6.55959	3.43689	-3.25791	1.04553	-2.8834	0.0623875	3.92772e-13	5.7474e-12	4.05434e-11	4.91507e-10
EC:2.1.1.220	tRNA (adenine(58)-N(1))-methyltransferase	4.46403	6.56092	3.43137	-3.26718	1.04756	-2.93131	0.0618	3.7968e-13	5.5702e-12	4.03798e-11	4.90541e-10
EC:2.1.1.266	23S rRNA (adenine(2030)-N(6))-methyltransferase	3.42709	3.98806	2.64794	-1.54128	1.07161	-1.42276	0.0519896	7.56078e-12	9.33677e-11	1.08932e-11	1.65144e-10
EC:2.1.1.298	Ribosomal protein L3 N(5)-glutamine methyltransferase	3.02124	3.79917	2.54451	-1.32634	1.21356	-1.06549	0.1118	2.18507e-08	1.6493e-07	2.88867e-08	1.88199e-07
EC:2.1.1.61	tRNA (5-methylaminomethyl-2-thiouridylate)-methyltransferase	2.77639	3.14911	1.9853	-1.16493	0.925006	-1.1786	0.1146	8.81907e-08	5.99988e-07	4.5438e-08	2.86419e-07
EC:2.1.1.77	Protein-L-isoaspartate(D-aspartate) O-methyltransferase	5.80953	6.11423	5.26709	-0.924371	0.795076	-1.15157	0.0679864	4.80442e-09	4.02332e-08	2.03789e-10	1.82759e-09
EC:2.1.1.80	Protein-glutamate O-methyltransferase	5.92095	6.13519	5.3475	-0.794759	0.63809	-1.15616	0.0911818	7.03494e-09	5.73444e-08	4.06633e-09	2.99732e-08
EC:2.3.1.117	2,3,4,5-tetrahydropyridine-2,6-dicarboxylate N-succinyltransferase	6.47997	7.05471	5.1237	-2.00543	0.88444	-2.19166	0.0123976	6.16474e-18	2.23026e-16	1.9491e-15	1.01629e-13
EC:2.3.1.128	Ribosomal-protein-alanine N-acetyltransferase	7.16208	7.97589	6.50465	-1.53091	0.692829	-2.09823	0.0342	1.19094e-16	3.03914e-15	4.21206e-13	9.35876e-12
EC:2.3.1.157	Glucosamine-1-phosphate N-acetyltransferase	6.23968	7.07071	5.36664	-1.71024	0.711661	-2.1846	0.059788	6.94168e-14	1.1133e-12	2.85188e-11	3.81917e-10
EC:2.3.1.16	Acetyl-CoA C-acyltransferase	6.44206	7.09769	5.25594	-1.9311	0.785968	-2.39457	0.00500008	8.15756e-20	5.18867e-18	1.94659e-16	2.21808e-14
EC:2.3.1.189	Mycothiol synthase	4.4078	6.49282	3.11172	-3.39489	1.12278	-2.76404	0.062	5.65032e-12	7.19046e-11	4.21388e-11	5.03747e-10
EC:2.3.1.40	Acyl-[acyl-carrier-protein]--phospholipid O-acyltransferase	4.23798	3.25886	6.37793	2.87975	1.58841	1.64628	0.0643871	4.56927e-11	5.18692e-10	5.632e-11	5.89072e-10
EC:2.3.1.9	Acetyl-CoA C-acetyltransferase	7.70915	9.15242	6.90173	-2.26895	0.585963	-3.6912	0.00659874	1.27805e-24	3.72921e-22	1.73775e-16	2.0824e-14
EC:2.3.2.2	Gamma-glutamyltransferase	6.04064	6.48616	5.84724	-0.636119	0.52538	-1.19854	0.0869826	1.17716e-09	1.07574e-08	1.58422e-09	1.22479e-08
EC:2.3.2.3	Lysyltransferase	-0.0795557	-0.787873	0.971596	1.88208	1.50138	1.19856	0.0923815	2.97222e-09	2.36172e-08	6.66692e-09	4.54364e-08
EC:2.3.3.5	2-methylcitrate synthase	2.07786	3.06768	1.36539	-1.52627	1.01176	-1.43944	0.0569886	1.17075e-11	1.33203e-10	1.36313e-11	1.9033e-10
EC:2.4.1.129	Peptidoglycan glycosyltransferase	4.22903	5.80897	3.21456	-2.60787	0.715798	-3.42016	0.06	8.83277e-16	1.83695e-14	4.01124e-11	4.88521e-10
EC:2.4.1.144	Beta-1,4-mannosyl-glycoprotein 4-beta-N-acetylglucosaminyltransferase	-1.4341	1.85184	-3.95226	-5.28034	3.85723	-1.2912	0.0671866	2.83321e-08	1.70062e-07	1.02196e-10	9.77778e-10
EC:2.4.1.187	mannosaminyltransferase	4.70892	3.60416	5.83781	1.95994	1.72633	1.07224	0.1418	1.62773e-07	1.06997e-06	3.44498e-07	1.86471e-06
EC:2.4.1.250	D-inositol-3-phosphate glycosyltransferase	4.41771	6.49533	3.15697	-3.33134	1.1128	-2.75757	0.0611878	9.44804e-12	1.16835e-10	4.18232e-11	5.01303e-10
EC:2.4.1.287	galactofuranosyltransferase	-3.17117	-5.05069	-1.63102	3.53168	2.68734	1.21723	0.067	4.33359e-07	1.99007e-06	3.26362e-10	2.65189e-09
EC:2.4.1.288	decaprenol beta-1,5/1,6-galactofuranosyltransferase	-2.41046	-4.49348	-1.03203	3.64843	2.66416	1.33254	0.0496	1.00876e-07	5.72819e-07	3.67635e-11	3.68417e-10
EC:2.4.1.315	Diglucosyl diacylglycerol synthase (1,6-linking)	3.51889	2.4456	5.39238	3.04208	1.86674	1.52867	0.0687862	3.1782e-10	3.22094e-09	1.30641e-10	1.21614e-09
EC:2.4.1.57	Phosphatidylinositol alpha-mannosyltransferase	4.40504	6.50393	3.32327	-3.25857	1.14172	-2.63261	0.0622	3.56242e-11	4.10988e-10	3.59242e-11	4.52227e-10
EC:2.4.2.21	Nicotinate-nucleotide--dimethylbenzimidazole phosphoribosyltransferase	5.71114	6.64156	4.36659	-2.3062	0.648315	-3.30506	0.00639878	5.03188e-23	7.21932e-21	2.19273e-16	2.36448e-14
EC:2.4.2.4	Thymidine phosphorylase	3.47176	4.09072	2.47458	-1.82924	1.09509	-1.69376	0.00919821	7.56211e-15	1.34764e-13	1.27287e-15	7.19979e-14
EC:2.4.2.9	Uracil phosphoribosyltransferase	7.78954	8.32702	7.19292	-0.997289	0.882516	-1.0794	0.115	1.80473e-08	1.38636e-07	3.11636e-08	2.03693e-07
EC:2.5.1.21	Squalene synthase	3.16236	2.41048	5.35973	2.80434	1.52291	1.61536	0.0689862	1.60204e-07	1.04963e-06	9.96782e-11	9.48418e-10
EC:2.5.1.26	Alkylglycerone-phosphate synthase	-0.300625	-1.27544	0.853345	2.22479	1.40796	1.56954	0.0308	9.00096e-13	1.17696e-11	4.29627e-13	8.85188e-12
EC:2.5.1.30	Heptaprenyl diphosphate synthase	4.53375	6.51922	3.58238	-2.98279	0.894886	-3.08943	0.0614	1.58817e-16	3.9449e-15	3.27122e-11	4.21864e-10
EC:2.5.1.56	N-acetylneuraminate synthase	4.88618	5.24613	3.89209	-1.66739	1.2616	-1.36785	0.0576	1.24563e-10	1.33534e-09	2.43322e-11	3.18548e-10
EC:2.5.1.68	(2Z,6E)-farnesyl diphosphate synthase	2.91857	3.8086	0.678512	-3.14232	1.63371	-1.77874	0.0439912	3.08438e-14	5.16401e-13	2.64599e-12	4.82538e-11
EC:2.6.1.16	Glutamine--fructose-6-phosphate transaminase (isomerizing)	6.70607	7.3546	5.99788	-1.39082	0.705401	-1.95673	0.0342	1.0565e-15	2.16597e-14	6.24005e-13	1.32689e-11
EC:2.6.1.19	4-aminobutyrate--2-oxoglutarate transaminase	4.7814	6.55134	4.18893	-2.43559	0.780362	-2.9905	0.0327935	4.17588e-20	2.88195e-18	2.91977e-13	6.82522e-12
EC:2.6.1.22	(S)-3-amino-2-methylpropionate transaminase	3.14349	3.96179	2.48493	-1.71117	1.25239	-1.369	0.0675865	2.76768e-10	2.83136e-09	7.68644e-11	7.67276e-10
EC:2.6.1.42	Branched-chain-amino-acid transaminase	7.85237	8.20127	7.1301	-1.08191	0.877137	-1.18768	0.109978	1.01659e-08	8.12929e-08	2.65482e-08	1.74331e-07
EC:2.6.1.52	Phosphoserine transaminase	6.49269	7.06838	5.25745	-1.94467	0.863678	-2.1706	0.0119976	1.42348e-17	4.63484e-16	1.80238e-15	9.61125e-14
EC:2.6.1.55	Taurine--2-oxoglutarate transaminase	2.69886	3.536	1.24862	-2.356	1.47474	-1.50633	0.07	7.3725e-11	8.10429e-10	1.45015e-10	1.33928e-09
EC:2.7.1.107	Diacylglycerol kinase (ATP)	6.4501	7.11126	5.562	-1.63014	0.713707	-2.22461	0.018	5.23335e-18	1.93051e-16	1.3362e-14	4.7809e-13
EC:2.7.1.15	Ribokinase	6.13008	6.78425	5.17641	-1.56027	0.792795	-1.77566	0.0728	1.24659e-11	1.52062e-10	1.64964e-10	1.5109e-09
EC:2.7.1.156	Adenosylcobinamide kinase	5.94374	6.8291	4.93244	-1.80268	0.614536	-2.64203	0.0396	1.10247e-17	3.70355e-16	1.16671e-12	2.30324e-11
EC:2.7.1.20	Adenosine kinase	3.5401	4.84665	2.63471	-2.26782	0.900185	-2.44506	0.00960004	2.29836e-19	1.06769e-17	6.43141e-16	4.61332e-14
EC:2.7.1.21	Thymidine kinase	6.15065	6.75672	4.37549	-2.41502	1.10679	-2.14474	0.0194	1.84704e-17	5.87275e-16	2.0296e-14	6.56299e-13
EC:2.7.1.24	Dephospho-CoA kinase	6.57365	7.10616	5.4743	-1.75364	0.834482	-2.03566	0.0158	6.36909e-17	1.754e-15	8.52768e-15	3.33148e-13
EC:2.7.1.30	Glycerol kinase	6.2443	7.21694	5.526	-1.70065	0.605599	-2.60432	0.0593881	3.81585e-15	7.26749e-14	2.71685e-11	3.6976e-10
EC:2.7.1.39	Homoserine kinase	6.69631	7.53775	5.70781	-1.87797	0.692515	-2.60236	0.0264	3.01081e-19	1.71545e-17	6.33162e-14	1.82504e-12
EC:2.7.1.56	1-phosphofructokinase	4.05386	6.1588	2.5876	-3.53504	0.956687	-3.29039	0.0452	4.73126e-19	2.49258e-17	2.82527e-12	5.13229e-11
EC:2.7.1.63	Polyphosphate--glucose phosphotransferase	4.40647	6.38229	2.63398	-3.74414	1.08724	-3.01785	0.0621876	4.16579e-15	7.87689e-14	3.98563e-11	4.86763e-10
EC:2.7.1.69	Protein-N(pi)-phosphohistidine--sugar phosphotransferase	5.83037	6.21727	4.8912	-1.33938	0.494237	-2.55465	0.03	2.37802e-16	5.46973e-15	1.79012e-13	4.44209e-12
EC:2.7.13.3	Histidine kinase	9.30695	9.59087	8.76375	-0.812585	0.628868	-1.11431	0.130574	7.45828e-08	5.16581e-07	1.25174e-07	7.30669e-07
EC:2.7.6.5	GTP diphosphokinase	6.58219	7.11145	5.57008	-1.66254	0.748739	-2.19074	0.00500008	3.67844e-18	1.41311e-16	1.60472e-16	2.00957e-14
EC:2.7.7.12	UDP-glucose--hexose-1-phosphate uridylyltransferase	6.04774	6.59408	4.52168	-2.29062	1.02557	-2.19658	0.0169966	4.264e-18	1.62027e-16	1.21166e-14	4.31682e-13
EC:2.7.7.23	UDP-N-acetylglucosamine diphosphorylase	6.28865	7.08211	5.46204	-1.60308	0.704387	-2.12679	0.0619876	3.36568e-13	4.9597e-12	3.50264e-11	4.40736e-10
EC:2.7.7.27	Glucose-1-phosphate adenylyltransferase	6.38551	6.96761	5.45075	-1.558	0.722014	-2.06828	0.0235953	4.96108e-17	1.3988e-15	3.08004e-14	9.57199e-13
EC:2.7.7.53	ATP adenylyltransferase	5.88334	6.71362	4.82497	-1.89876	1.01284	-1.6864	0.0684	5.97748e-07	3.54994e-06	1.0778e-10	1.0195e-09
EC:2.7.7.59	[Protein-PII] uridylyltransferase	4.7811	6.63011	4.18216	-2.42405	0.579184	-3.90174	0.023	2.98971e-22	3.30795e-20	3.58578e-14	1.10447e-12
EC:2.7.7.62	Adenosylcobinamide-phosphate guanylyltransferase	5.9497	6.8914	4.94368	-1.90056	0.583688	-2.95353	0.04	1.56802e-18	6.83484e-17	1.19884e-12	2.35961e-11
EC:2.7.7.68	2-phospho-L-lactate guanylyltransferase	4.18174	6.36777	3.23974	-3.19465	1.02317	-2.92526	0.0655869	6.28781e-10	6.11924e-09	5.18441e-11	5.65973e-10
EC:2.7.7.72	CCA tRNA nucleotidyltransferase	5.59166	5.97823	5.15496	-0.832452	0.613242	-1.31114	0.0735853	1.90976e-10	1.97969e-09	2.92293e-10	2.5521e-09
EC:2.7.7.82	CMP-N,N'-diacetyllegionaminic acid synthase	-1.99087	-1.08337	-3.55014	-2.39676	1.89098	-1.10527	0.108578	0.000212068	0.000425335	2.89236e-08	1.7414e-07
EC:2.7.8.26	Adenosylcobinamide-GDP ribazoletransferase	5.97176	6.89368	5.00563	-1.82977	0.584525	-2.84052	0.0468	8.61955e-18	2.9941e-16	2.77854e-12	5.08351e-11
EC:2.7.8.28	2-phospho-L-lactate transferase	4.19563	6.37691	3.26524	-3.17174	1.05165	-2.83162	0.064	1.4028e-09	1.28787e-08	5.57987e-11	5.84673e-10
EC:2.7.8.33	N-acetylglucosaminephosphotransferase	4.81961	6.62082	4.18314	-2.4984	0.855438	-2.82265	0.0658	2.23752e-12	3.02889e-11	5.59853e-11	5.8474e-10
EC:2.7.9.2	Pyruvate, water dikinase	5.70344	6.73564	4.89575	-1.83637	0.676007	-2.48464	0.0554	5.64301e-16	1.22705e-14	1.11087e-11	1.76634e-10
EC:2.7.9.3	Selenide, water dikinase	5.20667	5.64423	4.49425	-1.08508	0.701119	-1.39736	0.085	1.51006e-10	1.58994e-09	6.73745e-10	5.63441e-09
EC:2.8.1.1	Thiosulfate sulfurtransferase	5.21292	6.02608	4.53129	-1.51592	0.736685	-2.01157	0.0161968	1.32218e-16	3.29287e-15	6.93733e-15	2.77433e-13
EC:2.8.1.12	Molybdopterin synthase	6.16424	7.0067	5.45064	-1.5233	0.59757	-2.36657	0.0576	4.17262e-14	6.89511e-13	2.76888e-11	3.75664e-10
EC:2.8.1.2	3-mercaptopyruvate sulfurtransferase	5.16595	5.8642	4.47938	-1.41684	0.716003	-1.93896	0.0217957	9.45969e-16	1.9354e-14	3.6717e-14	1.09219e-12
EC:2.8.3.6	3-oxoadipate CoA-transferase	3.88361	4.31532	2.87824	-1.44341	1.06778	-1.22919	0.1132	2.44923e-09	2.1553e-08	3.32999e-08	2.15116e-07
EC:2.9.1.1	L-seryl-tRNA(Sec) selenium transferase	3.47236	4.84394	2.66578	-2.29973	0.890859	-2.45148	0.0643871	1.57036e-10	1.65673e-09	6.78145e-11	6.72947e-10
EC:3.1.1.1	Carboxylesterase	4.28029	6.40561	2.43289	-3.98048	0.953981	-3.57656	0.0584	2.43197e-18	9.91168e-17	2.09359e-11	2.95169e-10
EC:3.1.1.45	Carboxymethylenebutenolidase	6.54175	7.41781	5.75421	-1.6215	0.571993	-2.64485	0.0317937	8.24638e-19	4.00024e-17	1.78277e-13	4.45156e-12
EC:3.1.1.61	Protein-glutamate methylesterase	5.92297	6.12447	5.35151	-0.765823	0.636414	-1.10357	0.1156	2.96121e-08	2.18568e-07	4.26084e-08	2.65011e-07
EC:3.1.1.75	Poly(3-hydroxybutyrate) depolymerase	2.91427	3.22779	2.16612	-1.0524	0.941227	-1.01134	0.1256	6.35522e-07	3.70165e-06	1.13058e-07	6.62253e-07
EC:3.1.11.6	Exodeoxyribonuclease VII	7.73196	7.99767	6.68938	-1.22164	0.842401	-1.15624	0.1324	1.26163e-07	8.41286e-07	1.33478e-07	7.76133e-07
EC:3.1.21.2	Deoxyribonuclease IV	4.24469	6.11416	3.44061	-2.74017	0.923469	-2.84163	0.0595881	3.2157e-16	7.41145e-15	2.42952e-11	3.37179e-10
EC:3.1.26.11	Ribonuclease Z	5.6031	6.43738	5.26789	-1.06622	0.930301	-1.0761	0.108578	3.18324e-08	2.3531e-07	2.37519e-08	1.56427e-07
EC:3.1.26.12	Ribonuclease E	6.15242	7.00263	5.17256	-1.78677	0.774444	-2.07292	0.0594	8.25913e-14	1.31146e-12	1.97917e-11	2.87248e-10
EC:3.1.3.27	Phosphatidylglycerophosphatase	5.01764	5.65985	3.84399	-1.79202	0.723713	-2.11712	0.0219956	4.24974e-16	9.33914e-15	5.26302e-14	1.50674e-12
EC:3.1.3.41	4-nitrophenylphosphatase	2.72595	4.7355	1.23946	-3.46546	1.14427	-2.79585	0.0586	5.75884e-16	1.24033e-14	2.91512e-11	3.89015e-10
EC:3.1.3.5	5'-nucleotidase	6.92947	7.52303	6.25325	-1.28436	0.681153	-1.85188	0.0172	6.73365e-16	1.43386e-14	1.08362e-14	3.98049e-13
EC:3.1.31.1	Micrococcal nuclease	3.36074	5.22813	2.18924	-2.89421	1.15892	-2.27926	0.0657868	1.61951e-08	1.25046e-07	6.02349e-11	6.15495e-10
EC:3.1.4.46	Glycerophosphodiester phosphodiesterase	7.05781	8.1518	5.98236	-2.26489	0.715882	-2.99324	0.00919821	1.72481e-22	2.09275e-20	7.59215e-16	5.14793e-14
EC:3.2.2.21	DNA-3-methyladenine glycosylase II	6.60856	7.27639	6.04727	-1.21591	0.605365	-1.97442	0.0371926	9.13298e-16	1.89504e-14	7.48696e-13	1.55113e-11
EC:3.2.2.27	Uracil-DNA glycosylase	6.35551	6.94424	4.85816	-2.20851	0.86326	-2.50595	0.00459917	5.18533e-20	3.46628e-18	1.60781e-16	2.02134e-14
EC:3.3.2.12	Oxepin-CoA hydrolase	2.09906	2.60994	1.09007	-1.53855	1.20816	-1.20446	0.0809838	2.46841e-09	2.13085e-08	1.14772e-09	9.17769e-09
EC:3.3.2.8	Limonene-1,2-epoxide hydrolase	2.73079	4.72188	1.03771	-3.66544	1.2822	-2.60353	0.064787	7.08e-11	7.77406e-10	6.21213e-11	6.32598e-10
EC:3.4.11.1	Leucyl aminopeptidase	6.68802	7.38359	5.85634	-1.63527	0.721951	-2.06672	0.0481904	8.1518e-15	1.46941e-13	7.37532e-12	1.23906e-10
EC:3.4.11.2	Membrane alanyl aminopeptidase	5.68312	6.266	5.43404	-0.82802	0.749713	-1.06956	0.133373	4.15529e-08	3.00151e-07	2.6084e-07	1.41005e-06
EC:3.4.11.21	Aspartyl aminopeptidase	3.75672	4.92652	2.20811	-2.61995	0.9724	-2.45742	0.0583883	2.15279e-15	4.22354e-14	1.77062e-11	2.62136e-10
EC:3.4.17.11	Glutamate carboxypeptidase	3.89142	5.5942	3.14267	-2.53742	0.81136	-2.89607	0.054	8.62488e-17	2.2925e-15	1.15501e-11	1.81526e-10
EC:3.4.19.13	Glutathione hydrolase	6.04156	6.4854	5.84905	-0.637882	0.528151	-1.17811	0.0844	1.22074e-09	1.11304e-08	1.74261e-09	1.3299e-08
EC:3.4.21.107	Peptidase Do	6.12025	5.68288	6.85567	1.2082	0.940969	1.18226	0.0954	1.20569e-08	9.50085e-08	2.60234e-09	2.03786e-08
EC:3.4.21.53	Endopeptidase La	6.52489	7.24282	5.92455	-1.34471	0.558185	-2.34459	0.0144	7.90726e-19	3.79564e-17	5.07864e-15	2.15986e-13
EC:3.4.21.83	Oligopeptidase B	5.02263	5.95776	4.14996	-1.86357	1.23832	-1.47235	0.048	4.02689e-12	5.22878e-11	4.13117e-12	7.22219e-11
EC:3.4.22.70	Sortase A	4.81529	6.75013	3.82322	-2.92031	0.891283	-3.06287	0.0374	5.26976e-19	2.74175e-17	8.95034e-13	1.82228e-11
EC:3.4.24.84	Ste24 endopeptidase	3.46389	4.00684	2.80767	-1.1898	0.914872	-1.2509	0.0779844	3.89869e-10	3.87042e-09	6.3394e-10	5.30313e-09
EC:3.4.25.1	Proteasome endopeptidase complex	5.19844	7.40609	4.20209	-3.24457	1.02225	-2.9171	0.064987	1.62517e-09	1.48009e-08	5.71254e-11	5.91551e-10
EC:3.5.1.103	deacetylase	2.71889	3.8018	0.441522	-3.44104	1.60344	-1.98785	0.0444	4.25396e-15	7.97567e-14	4.18526e-12	7.31788e-11
EC:3.5.1.105	Chitin disaccharide deacetylase	3.65101	5.02547	2.71044	-2.31306	1.02226	-2.0942	0.0587882	7.56268e-11	8.33424e-10	2.76683e-11	3.74219e-10
EC:3.5.1.115	Mycothiol S-conjugate amidase	4.2204	6.23672	3.01188	-3.1898	1.08349	-2.6899	0.064	1.99032e-09	1.78068e-08	5.60014e-11	5.8546e-10
EC:3.5.1.18	Succinyl-diaminopimelate desuccinylase	5.42901	6.22132	4.32281	-1.86201	0.652318	-2.52106	0.0164	5.26746e-19	2.67339e-17	1.05284e-14	3.94629e-13
EC:3.5.1.32	Hippurate hydrolase	5.86595	6.59109	4.31667	-2.23762	0.58773	-3.65412	1.40363e-05	6.2057e-24	1.23181e-21	8.6458e-18	6.6272e-15
EC:3.5.1.4	Amidase	6.00676	6.79793	5.17669	-1.7297	0.607272	-2.86643	0.0014003	8.69406e-24	1.746e-21	2.25685e-17	7.60396e-15
EC:3.5.1.77	N-carbamoyl-D-amino-acid hydrolase	2.71469	4.72305	1.01812	-3.70362	1.37068	-2.44224	0.0631874	8.49719e-09	6.76552e-08	6.28349e-11	6.3776e-10
EC:3.5.1.87	N-carbamoyl-L-amino-acid hydrolase	5.31204	6.37513	3.71399	-2.63536	0.716476	-3.52752	0.00160026	9.95134e-26	5.03278e-23	3.25378e-17	8.11901e-15
EC:3.5.1.9	Arylformamidase	3.45926	3.75226	2.35962	-1.4223	0.967442	-1.33131	0.1074	1.14342e-08	9.02703e-08	1.29805e-08	9.09253e-08
EC:3.5.2.2	Dihydropyrimidinase	3.89782	5.21777	2.60671	-2.61403	0.694485	-3.50464	0.0040001	1.70835e-25	7.6013e-23	9.959e-17	1.60524e-14
EC:3.5.3.6	Arginine deiminase	4.28344	6.2123	2.78623	-3.44006	0.850759	-3.63244	0.0641872	1.08823e-13	1.70084e-12	5.68496e-11	5.89802e-10
EC:3.5.4.1	Cytosine deaminase	5.08973	5.51507	4.40418	-1.11614	0.902829	-1.13603	0.112577	1.87929e-08	1.43564e-07	2.75406e-08	1.79821e-07
EC:3.5.4.13	dCTP deaminase	6.52296	7.19595	5.6365	-1.46802	0.871343	-1.53416	0.0802	8.1739e-10	7.83033e-09	5.76879e-10	4.89689e-09
EC:3.5.4.4	Adenosine deaminase	6.15008	6.69705	4.17574	-2.5449	0.831126	-2.92371	0.00640006	4.36703e-22	4.51956e-20	2.67745e-16	2.62407e-14
EC:3.5.4.5	Cytidine deaminase	6.21438	6.77095	4.6566	-2.22255	1.05897	-2.06359	0.0186	2.96879e-17	8.89838e-16	1.84915e-14	6.05023e-13
EC:3.5.99.10	2-iminobutanoate/2-iminopropanoate deaminase	6.09004	6.62379	4.96219	-1.84599	1.06437	-1.68481	0.0327935	4.23813e-14	6.97635e-13	4.04233e-13	8.96361e-12
EC:3.6.1.11	Exopolyphosphatase	7.65587	8.02889	6.7103	-1.2139	0.916742	-1.13016	0.1206	7.51271e-08	5.2353e-07	5.41133e-08	3.3746e-07
EC:3.6.1.22	NAD(+) diphosphatase	4.36834	6.51218	3.17379	-3.30731	0.85349	-3.60575	0.0532	1.0835e-18	5.013e-17	1.23603e-11	1.92845e-10
EC:3.6.1.23	dUTP diphosphatase	6.5053	7.10243	5.18477	-1.98567	0.817877	-2.31718	0.0109978	1.01084e-18	4.7272e-17	1.35222e-15	7.83695e-14
EC:3.6.1.27	Undecaprenyl-diphosphate phosphatase	7.94008	8.27003	7.18518	-1.13103	0.795574	-1.29429	0.0909818	7.07213e-10	6.83374e-09	1.98991e-09	1.56229e-08
EC:3.6.1.31	Phosphoribosyl-ATP diphosphatase	6.54473	7.3143	5.68839	-1.66286	0.691552	-2.30277	0.0213957	1.9816e-18	8.35929e-17	3.30361e-14	1.02757e-12
EC:3.6.1.40	Guanosine-5'-triphosphate,3'-diphosphate diphosphatase	7.65552	8.02775	6.71263	-1.22405	0.927338	-1.1398	0.119976	7.62717e-08	5.31152e-07	5.45237e-08	3.40179e-07
EC:3.6.1.41	Bis(5'-nucleosyl)-tetraphosphatase (symmetrical)	3.04373	3.79797	2.59916	-1.3269	1.22761	-1.03803	0.111978	3.77987e-08	2.73992e-07	4.35234e-08	2.73696e-07
EC:3.6.1.7	Acylphosphatase	5.78958	6.76975	5.07688	-1.67261	0.723285	-2.06654	0.0665867	3.33519e-08	2.46398e-07	7.44304e-11	7.29617e-10
EC:3.6.3.16	Arsenite-transporting ATPase	1.88668	1.46663	2.45555	1.01136	0.903384	1.03211	0.123775	2.75252e-07	1.67459e-06	1.29743e-07	7.29466e-07
EC:3.6.3.17	Monosaccharide-transporting ATPase	7.65647	8.1149	6.37145	-1.64406	0.756908	-1.87846	0.0384	3.34976e-15	6.38832e-14	8.70392e-13	1.75355e-11
EC:3.6.3.2	Magnesium-importing ATPase	0.957907	1.7986	0.359257	-1.31086	1.19666	-1.02927	0.14897	6.1319e-07	3.51414e-06	9.71192e-07	4.64326e-06
EC:3.6.3.20	Glycerol-3-phosphate-transporting ATPase	2.89161	3.38198	2.05579	-1.21569	0.868511	-1.26376	0.122376	3.93842e-09	3.31619e-08	5.19482e-08	3.2205e-07
EC:3.6.3.21	Polar-amino-acid-transporting ATPase	6.63828	7.48094	5.02136	-2.43406	0.745818	-3.08797	0.00140002	3.9593e-23	5.75965e-21	2.57999e-17	7.48261e-15
EC:3.6.3.29	Molybdate-transporting ATPase	4.7861	6.66796	4.27097	-2.37575	0.524709	-4.26196	0.0198	2.87708e-22	3.18108e-20	2.05052e-14	6.82363e-13
EC:3.6.3.40	Teichoic-acid-transporting ATPase	2.33044	3.94461	0.0963226	-3.96588	1.81941	-2.10699	0.0213957	5.65741e-17	1.52366e-15	2.40573e-14	7.79466e-13
EC:3.6.3.41	Heme-transporting ATPase	5.05666	5.6027	3.90446	-1.69954	0.870305	-1.75371	0.0704	6.35195e-09	5.25248e-08	2.63021e-10	2.33306e-09
EC:3.6.3.54	Cu(+) exporting ATPase	6.64051	7.53964	5.76959	-1.75603	0.616674	-2.71312	0.0104	1.993e-21	1.75776e-19	1.18932e-15	7.10217e-14
EC:3.6.3.8	Calcium-transporting ATPase	6.51849	7.11661	5.41329	-1.80258	0.930786	-1.81532	0.0403919	9.55432e-15	1.70353e-13	1.13178e-12	2.22529e-11
EC:3.7.1.3	Kynureninase	6.19459	6.78641	4.42669	-2.45408	1.11085	-2.15749	0.0116	2.01141e-17	6.2895e-16	3.43897e-15	1.56979e-13
EC:3.8.1.5	Haloalkane dehalogenase	4.01853	5.01134	2.97961	-2.04205	1.12742	-1.65899	0.0676	3.54519e-05	0.000130903	6.71618e-11	6.68637e-10
EC:4.1.1.37	Uroporphyrinogen decarboxylase	6.60317	7.16607	5.85966	-1.34511	0.701154	-1.81689	0.0388	8.0541e-15	1.44742e-13	6.22978e-13	1.31711e-11
EC:4.1.1.44	4-carboxymuconolactone decarboxylase	4.36876	4.69208	3.74537	-0.917835	0.631717	-1.33764	0.0735853	1.2795e-10	1.34908e-09	2.49988e-10	2.19766e-09
EC:4.1.1.45	Aminocarboxymuconate-semialdehyde decarboxylase	1.83607	2.37109	1.08546	-1.39829	1.25167	-1.0649	0.1054	1.46144e-07	9.49293e-07	1.28814e-08	8.90365e-08
EC:4.1.1.73	Tartrate decarboxylase	3.57677	3.91043	2.58761	-1.35935	0.927	-1.32991	0.0985803	3.01335e-09	2.6018e-08	5.85086e-09	4.36338e-08
EC:4.1.1.9	Malonyl-CoA decarboxylase	2.81054	3.44003	2.171	-1.25805	0.77941	-1.5455	0.0559888	3.57449e-12	4.51855e-11	2.49361e-11	3.10718e-10
EC:4.1.2.14	2-dehydro-3-deoxy-phosphogluconate aldolase	5.97365	6.48656	5.36431	-1.20393	0.719994	-1.61279	0.0617876	3.65004e-12	4.7477e-11	4.55139e-11	5.17628e-10
EC:4.1.3.24	Malyl-CoA lyase	3.20752	4.96394	2.20943	-2.73602	0.860315	-2.88846	0.0639872	5.40158e-14	8.75346e-13	5.07374e-11	5.58524e-10
EC:4.1.3.25	(S)-citramalyl-CoA lyase	3.38195	5.10767	2.53343	-2.6271	0.859959	-2.83588	0.0639872	2.07996e-13	3.1396e-12	4.97993e-11	5.53812e-10
EC:4.1.3.3	N-acetylneuraminate lyase	0.249989	-1.38464	0.919543	2.20746	2.03916	1.07396	0.116	5.11467e-08	3.20574e-07	4.19256e-08	2.60117e-07
EC:4.1.3.34	Citryl-CoA lyase	5.26028	6.56517	4.19707	-2.34742	0.585519	-3.86482	0.00240017	2.03808e-27	3.98216e-24	3.43769e-17	8.43838e-15
EC:4.1.3.4	Hydroxymethylglutaryl-CoA lyase	5.28102	5.99534	5.05703	-0.991331	0.94438	-1.02382	0.128	3.3753e-08	2.47937e-07	2.1308e-07	1.162e-06
EC:4.1.3.42	(4S)-4-hydroxy-2-oxoglutarate aldolase	5.9755	6.48599	5.36354	-1.20325	0.710143	-1.61646	0.0645871	3.49004e-12	4.55563e-11	4.39168e-11	5.04203e-10
EC:4.1.99.16	Geosmin synthase	-5.79013	-7.72253	-3.39002	4.29948	3.92626	1.0008	0.1222	3.11321e-05	7.99481e-05	1.18842e-06	3.97597e-06
EC:4.1.99.18	Cyclic pyranopterin phosphate synthase	7.59339	7.93315	6.76601	-1.13283	0.722302	-1.28994	0.123575	8.68736e-08	5.96899e-07	5.5121e-08	3.43909e-07
EC:4.2.1.1	Carbonate dehydratase	7.00526	7.70126	6.48696	-1.23398	0.784733	-1.54065	0.0309938	2.99998e-13	4.44565e-12	2.43057e-13	5.75541e-12
EC:4.2.1.108	Ectoine synthase	-2.7387	-3.99176	-1.17956	2.81467	2.28955	1.13114	0.071	3.22122e-06	1.07622e-05	3.71865e-09	2.23211e-08
EC:4.2.1.129	Squalene--hopanol cyclase	3.65484	3.12264	5.48455	2.47404	1.28726	1.7476	0.0626	9.08356e-08	6.23604e-07	5.42835e-11	5.82243e-10
EC:4.2.1.131	Carotenoid 1,2-hydratase	0.00152776	1.51247	-0.674583	-2.13446	1.42447	-1.37892	0.0902	1.71135e-10	1.73295e-09	2.67352e-09	2.01167e-08
EC:4.2.1.17	Enoyl-CoA hydratase	7.62865	9.16611	6.74099	-2.47616	0.648548	-3.55747	0.0318	1.03287e-20	7.97556e-19	3.06747e-13	7.13352e-12
EC:4.2.1.42	Galactarate dehydratase	2.32589	2.64701	1.29057	-1.3638	0.985883	-1.22312	0.117377	3.696e-08	2.67935e-07	3.07254e-08	1.99651e-07
EC:4.2.1.75	Uroporphyrinogen-III synthase	7.60571	8.01993	6.82465	-1.09641	0.897617	-1.06424	0.1278	1.79756e-07	1.16617e-06	1.58607e-07	9.12427e-07
EC:4.2.1.79	2-methylcitrate dehydratase	2.01286	2.91647	1.51877	-1.44059	1.27427	-1.0176	0.125975	1.29876e-06	7.07596e-06	1.06502e-07	6.21226e-07
EC:4.2.1.83	4-oxalmesaconate hydratase	2.30695	2.61983	1.32453	-1.3677	0.959747	-1.29225	0.113577	2.78647e-08	2.05949e-07	2.58431e-08	1.69992e-07
EC:4.2.1.9	Dihydroxy-acid dehydratase	7.33426	7.59162	6.61348	-0.913574	0.754207	-1.06251	0.1454	2.49707e-07	1.57405e-06	5.73008e-07	2.91687e-06
EC:4.2.1.91	Arogenate dehydratase	1.48381	1.99368	0.486925	-1.5249	1.22303	-1.17495	0.110378	8.53973e-09	6.69286e-08	3.32697e-08	2.12089e-07
EC:4.2.3.22	Germacradienol synthase	-5.79412	-7.76903	-3.36691	4.34388	3.91367	1.00935	0.115777	2.45783e-05	6.57417e-05	8.99096e-07	3.51804e-06
EC:4.2.3.75	(-)-germacrene D synthase	-5.8116	-7.74728	-3.3798	4.33382	3.89732	1.02933	0.118776	3.83587e-05	8.92523e-05	9.28868e-07	3.56692e-06
EC:4.3.3.6	Pyridoxal 5'-phosphate synthase (glutamine hydrolyzing)	5.51217	7.57082	4.4968	-3.15727	0.986567	-3.00073	0.0607878	5.47958e-15	1.01911e-13	3.05817e-11	4.05379e-10
EC:4.3.3.7	4-hydroxy-tetrahydrodipicolinate synthase	7.6519	7.93638	6.92698	-0.95198	0.703993	-1.2771	0.111578	9.97813e-10	9.32668e-09	1.60892e-08	1.10338e-07
EC:4.4.1.21	S-ribosylhomocysteine lyase	-2.22958	-4.32401	-0.876156	3.79184	2.95783	1.19303	0.0883823	4.83668e-07	2.33977e-06	2.79581e-09	2.07033e-08
EC:4.99.1.1	Ferrochelatase	6.83003	7.39172	6.37112	-0.982207	0.825797	-1.09682	0.1112	6.34305e-08	4.47892e-07	1.49036e-08	1.02753e-07
EC:4.99.1.4	Sirohydrochlorin ferrochelatase	6.07524	6.83667	4.5146	-2.37873	0.715022	-3.01478	0.0266	6.145e-20	4.0533e-18	1.07148e-13	2.87273e-12
EC:5.1.3.13	dTDP-4-dehydrorhamnose 3,5-epimerase	6.68954	7.31269	6.07464	-1.20006	0.646838	-1.74133	0.0506	1.23258e-13	1.90769e-12	5.90286e-12	1.00738e-10
EC:5.1.99.4	Alpha-methylacyl-CoA racemase	4.28462	6.30739	3.49166	-2.92991	0.927563	-2.97701	0.0655869	1.60613e-13	2.4624e-12	5.57281e-11	5.8344e-10
EC:5.3.1.23	S-methyl-5-thioribose-1-phosphate isomerase	5.31247	6.15298	4.59341	-1.49881	0.852266	-1.5506	0.0812	0.000190017	0.000528116	5.241e-10	4.47323e-09
EC:5.3.3.18	2-(1,2-epoxy-1,2-dihydrophenyl)acetyl-CoA isomerase	4.94418	6.58883	4.32901	-2.27312	0.536981	-3.93544	0.0228	7.11365e-22	6.99489e-20	2.47293e-14	7.98394e-13
EC:5.4.2.10	Phosphoglucosamine mutase	6.21464	7.0541	5.3226	-1.74063	0.718882	-2.20895	0.0589882	2.29126e-14	3.91053e-13	1.98859e-11	2.87804e-10
EC:5.4.2.11	Phosphoglycerate mutase (2,3-diphosphoglycerate-dependent)	4.81261	6.66535	4.20326	-2.51299	0.644762	-3.6578	0.0193961	1.20304e-21	1.12097e-19	1.63833e-14	5.65542e-13
EC:5.4.2.12	Phosphoglycerate mutase (2,3-diphosphoglycerate-independent)	8.44234	9.0488	7.44612	-1.52669	0.882258	-1.4952	0.070186	8.14656e-10	7.81931e-09	1.15633e-10	1.09275e-09
EC:5.4.2.8	Phosphomannomutase	6.61348	7.31888	5.7051	-1.78716	0.806671	-2.12068	0.025195	1.89138e-17	5.98884e-16	7.44379e-14	2.10942e-12
EC:5.4.3.8	Glutamate-1-semialdehyde 2,1-aminomutase	7.41434	7.73665	6.66573	-1.04014	0.862672	-1.05759	0.135573	1.65593e-07	1.08031e-06	2.09878e-07	1.16645e-06
EC:5.4.99.2	Methylmalonyl-CoA mutase	7.83391	8.39523	6.42157	-2.18209	0.984163	-2.16378	0.0152	1.70983e-17	5.50131e-16	6.01418e-15	2.46579e-13
EC:5.5.1.4	Inositol-3-phosphate synthase	4.59097	6.592	3.45551	-3.2273	0.958289	-3.08808	0.0624	8.47381e-13	1.20132e-11	4.58235e-11	5.30768e-10
EC:6.2.1.16	Acetoacetate--CoA ligase	5.32956	6.23972	3.19454	-3.03995	0.981729	-2.64769	0.035193	2.23052e-17	6.93243e-16	4.20617e-13	9.36976e-12
EC:6.2.1.3	Long-chain-fatty-acid--CoA ligase	7.44072	8.50976	6.75695	-1.78984	0.582108	-2.98573	0.0207959	4.10594e-21	3.41942e-19	2.71763e-14	8.69027e-13
EC:6.3.1.10	Adenosylcobinamide-phosphate synthase	5.61331	6.66457	4.75238	-1.87454	0.537719	-3.18127	0.0132	3.11105e-22	3.37941e-20	1.89757e-15	9.9566e-14
EC:6.3.1.13	ligase	4.41457	6.49274	3.11521	-3.38564	1.11741	-2.75504	0.0619876	6.18823e-12	7.83318e-11	4.08295e-11	4.94019e-10
EC:6.3.1.2	Glutamate--ammonia ligase	8.04941	8.44062	7.25296	-1.04299	0.867469	-1.06632	0.1296	9.72315e-08	6.61594e-07	1.32875e-07	7.74548e-07
EC:6.3.2.31	Coenzyme F420-0:L-glutamate ligase	4.19021	6.37818	3.26998	-3.17165	1.03759	-2.87549	0.0627874	9.91708e-10	9.33491e-09	5.60621e-11	5.86073e-10
EC:6.3.2.34	Coenzyme F420-1:gamma-L-glutamate ligase	4.20326	6.37745	3.26884	-3.1539	1.03482	-2.80364	0.0669866	9.99773e-10	9.42064e-09	5.60447e-11	5.86367e-10
EC:6.3.2.8	UDP-N-acetylmuramate--L-alanine ligase	6.59568	7.16064	5.84203	-1.36967	0.683394	-1.91854	0.0311938	1.15311e-15	2.34842e-14	1.87458e-13	4.62787e-12
EC:6.3.4.21	Nicotinate phosphoribosyltransferase	4.89389	6.48514	4.32751	-2.1601	0.540053	-3.76561	0.00819841	1.39998e-23	2.55679e-21	3.81653e-16	3.22996e-14
EC:6.3.4.3	Formate--tetrahydrofolate ligase	3.51439	5.07344	2.79789	-2.30302	0.76943	-2.79679	0.0363927	2.37016e-18	9.64656e-17	8.86851e-13	1.79514e-11
EC:6.3.5.10	Adenosylcobyric acid synthase (glutamine-hydrolyzing)	5.57724	6.66655	4.59463	-2.04253	0.658741	-2.79616	0.0417917	5.12641e-18	1.88449e-16	1.87004e-12	3.53556e-11
EC:6.3.5.11	Cobyrinate a,c-diamide synthase (glutamine-hydrolyzing)	5.37439	6.18729	4.49232	-1.66194	0.656444	-2.2481	0.05	6.52962e-16	1.39528e-14	1.2343e-11	1.87078e-10
EC:6.3.5.4	Asparagine synthase (glutamine-hydrolyzing)	6.92835	7.39404	6.20208	-1.21502	0.821584	-1.42668	0.0536	2.15086e-11	2.5428e-10	1.02034e-11	1.59646e-10
EC:6.3.5.9	Hydrogenobyrinic acid a,c-diamide synthase (glutamine-hydrolyzing)	5.37401	6.18699	4.49223	-1.65224	0.659985	-2.26654	0.0513897	6.70023e-16	1.42631e-14	1.21493e-11	1.85094e-10
EC:6.4.1.3	Propionyl-CoA carboxylase	7.39001	7.88853	5.94629	-2.07312	0.942837	-2.14695	0.0123976	5.28484e-18	1.95701e-16	1.98377e-15	1.05023e-13
Predicted genes were enriched in the PA communities
EC	description	rab.all	rab.win.FL	rab.win.PA	diff.btw	diff.win	effect	overlap	we.ep	we.eBH	wi.ep	wi.eBH
EC:1.1.1.132	GDP-mannose 6-dehydrogenase	-3.54124	-5.43972	-0.746795	4.83956	3.38115	1.35811	0.0618	1.46572e-08	9.00748e-08	2.96512e-10	2.37012e-09
EC:1.1.1.27	L-lactate dehydrogenase	0.700754	-0.746603	1.62116	2.2523	1.74909	1.21023	0.099	8.49651e-09	6.63059e-08	4.14594e-09	3.09727e-08
EC:1.1.1.302	2,5-diamino-6-(ribosylamino)-4(3H)-pyrimidinone 5'-phosphate reductase	3.6911	2.7414	5.32902	2.43374	1.98596	1.02426	0.0965807	1.53244e-05	6.38715e-05	5.08375e-09	3.83369e-08
EC:1.1.1.337	L-2-hydroxycarboxylate dehydrogenase (NAD(+))	-4.9239	-7.07251	-1.01475	6.01483	4.21737	1.37748	0.0658	2.8169e-07	9.39454e-07	9.37293e-10	6.80007e-09
EC:1.1.1.47	Glucose 1-dehydrogenase (NAD(P)(+))	0.256919	-0.388799	1.31843	1.67055	1.32191	1.2215	0.0976	1.37375e-08	9.53891e-08	1.53682e-08	1.00162e-07
EC:1.11.1.19	Dye decolorizing peroxidase	-2.91574	-5.1372	-1.6036	3.62242	3.27023	1.01229	0.1196	2.97055e-06	1.09453e-05	9.69913e-08	5.34073e-07
EC:1.13.11.33	Arachidonate 15-lipoxygenase	-5.65579	-7.5546	-2.63087	4.97473	4.04819	1.13221	0.1092	2.51621e-05	5.48505e-05	2.61659e-07	1.09991e-06
EC:1.14.11.18	Phytanoyl-CoA dioxygenase	-1.97429	-2.93899	-0.566007	2.65648	2.33873	1.04445	0.0967806	5.36213e-06	1.78322e-05	1.58681e-08	9.82557e-08
EC:1.14.13.165	Nitric-oxide synthase (NAD(P)H)	-4.05979	-5.73336	-2.30734	3.62185	3.26559	1.0269	0.09978	8.2382e-05	0.00013966	9.44459e-08	4.76786e-07
EC:1.14.13.70	Sterol 14-alpha-demethylase	-2.87874	-5.01734	0.16211	5.15102	2.44537	2.06191	0.0105979	2.92549e-10	2.2385e-09	4.03563e-15	1.59185e-13
EC:1.14.19.9	Tryptophan 7-halogenase	4.58424	3.1288	6.92279	4.0235	2.52679	1.60784	0.054789	2.83817e-12	3.77688e-11	8.28812e-12	1.36132e-10
EC:1.2.1.19	Aminobutyraldehyde dehydrogenase	-1.77469	-3.47192	0.280507	3.90111	2.14345	1.79765	0.00939816	1.15305e-07	4.29753e-07	1.94322e-15	9.1811e-14
EC:1.3.1.28	2,3-dihydro-2,3-dihydroxybenzoate dehydrogenase	-3.76607	-5.47521	-2.31225	3.18814	2.91952	1.05031	0.0772	1.21599e-05	2.99266e-05	4.7966e-09	2.96426e-08
EC:1.3.1.31	2-enoate reductase	-3.80552	-5.94229	-2.2395	3.77842	3.17462	1.12322	0.0793841	6.08198e-06	1.58091e-05	2.07294e-09	1.47057e-08
EC:1.3.1.34	2,4-dienoyl-CoA reductase (NADPH)	1.57584	0.276743	2.20601	1.78596	1.5724	1.01104	0.1656	1.03964e-06	5.81069e-06	1.43766e-06	6.74905e-06
EC:1.5.1.7	Saccharopine dehydrogenase (NAD(+), L-lysine-forming)	3.04346	1.89909	5.37254	3.63503	1.71097	2.05313	0.0286	1.02999e-16	2.66275e-15	1.24355e-13	3.25365e-12
EC:1.5.3.1	Sarcosine oxidase	4.53269	3.35768	5.60924	2.2151	0.979287	2.26133	0.00600007	7.60829e-17	2.01881e-15	2.30841e-16	2.40582e-14
EC:1.5.5.2	Proline dehydrogenase	4.74491	4.29287	5.64321	1.47067	1.1812	1.19932	0.0808	2.26163e-09	2.00134e-08	3.81388e-10	3.30363e-09
EC:1.8.1.2	Assimilatory sulfite reductase (NADPH)	5.87951	5.57358	6.62637	1.12506	0.947191	1.06621	0.1102	6.01848e-07	3.56475e-06	1.43947e-08	9.97333e-08
EC:1.8.98.1	CoB--CoM heterodisulfide reductase	-3.65874	-5.44565	-1.73699	3.95346	3.34282	1.09261	0.103779	1.03414e-06	4.60509e-06	1.78675e-08	1.13465e-07
EC:2.1.1.184	23S rRNA (adenine(2085)-N(6))-dimethyltransferase	-4.3067	-6.4913	-2.49977	3.85299	3.27505	1.08185	0.0911818	1.36196e-05	3.43893e-05	1.89272e-08	1.08166e-07
EC:2.1.1.189	23S rRNA (uracil(747)-C(5))-methyltransferase	-4.13707	-6.34579	-2.31233	4.16962	3.91454	1.00125	0.110978	8.50286e-06	2.42562e-05	1.59025e-07	7.93678e-07
EC:2.1.1.217	tRNA (adenine(22)-N(1))-methyltransferase	-2.43568	-4.10644	-1.07069	3.3197	2.77743	1.1085	0.0936	3.89525e-06	1.2662e-05	5.05165e-09	3.56486e-08
EC:2.1.1.35	tRNA (uracil(54)-C(5))-methyltransferase	3.12774	1.89078	5.33986	3.6759	2.26555	1.56005	0.0556	1.07754e-11	1.32128e-10	1.45816e-11	2.21018e-10
EC:2.1.1.41	Sterol 24-C-methyltransferase	-3.9294	-6.62716	-0.204402	6.35676	3.397	1.78285	0.036	1.91872e-10	1.54591e-09	2.17364e-12	3.63482e-11
EC:2.1.1.95	Tocopherol O-methyltransferase	-3.02842	-5.45043	0.422568	5.30745	3.82869	1.31171	0.0755849	2.78631e-08	1.70773e-07	5.72576e-10	4.59912e-09
EC:2.1.3.1	Methylmalonyl-CoA carboxytransferase	-3.02157	-6.08542	-1.47687	4.76311	4.2652	1.06272	0.0785843	2.86469e-06	9.09547e-06	2.67895e-09	1.87819e-08
EC:2.3.1.178	Diaminobutyrate acetyltransferase	-2.84313	-4.07964	-1.45795	2.7107	2.3555	1.07365	0.0865827	6.48844e-06	2.18161e-05	8.4772e-09	5.43902e-08
EC:2.3.1.193	tRNA(Met) cytidine acetyltransferase	-3.91663	-5.99605	-1.80928	4.4349	4.10817	1.01448	0.114777	2.61993e-06	9.22147e-06	1.34532e-07	7.13383e-07
EC:2.6.1.46	Diaminobutyrate--pyruvate transaminase	-4.92748	-7.08917	-1.02318	5.98916	4.18676	1.36532	0.0624	1.45347e-08	8.82506e-08	9.13409e-10	6.56778e-09
EC:2.6.1.66	Valine--pyruvate transaminase	4.18717	3.38771	5.45796	2.12028	1.06681	1.95843	0.00739858	2.46785e-14	4.17878e-13	3.79642e-16	3.24056e-14
EC:2.6.1.83	LL-diaminopimelate aminotransferase	4.86013	3.86816	5.8694	1.86521	1.60247	1.03414	0.1254	2.07588e-05	8.32379e-05	8.66911e-08	5.2369e-07
EC:2.7.1.29	Glycerone kinase	-2.29062	-3.74969	-0.842212	2.99217	1.90514	1.51568	0.0283943	2.72691e-08	1.57635e-07	2.09707e-12	2.98385e-11
EC:2.7.1.43	Glucuronokinase	-4.50771	-6.79353	-1.02082	5.93207	3.73544	1.53305	0.0411918	7.58511e-09	4.5915e-08	1.19957e-11	1.33842e-10
EC:2.7.1.5	Rhamnulokinase	0.948824	0.104094	1.50027	1.31075	1.21366	1.04255	0.123375	3.14134e-08	2.24525e-07	6.40106e-08	3.79604e-07
EC:2.7.14.1	Protein arginine kinase	3.56427	2.45283	5.42026	2.92071	1.69196	1.59109	0.0698	3.41583e-09	2.93939e-08	1.01394e-10	9.63687e-10
EC:2.7.2.2	Carbamate kinase	-0.0824196	-0.829421	0.659538	1.472	1.34056	1.01992	0.130774	3.0632e-06	1.19424e-05	3.93488e-07	1.9456e-06
EC:2.7.2.7	Butyrate kinase	-0.664495	-2.01245	0.207749	2.3809	2.06743	1.06338	0.0629874	1.55369e-05	4.48243e-05	1.33461e-10	1.20573e-09
EC:2.7.4.2	Phosphomevalonate kinase	-3.4269	-5.93126	-2.18055	4.13447	3.57099	1.09944	0.085183	4.41011e-07	2.35979e-06	7.74068e-09	4.97833e-08
EC:2.7.7.58	(2,3-dihydroxybenzoyl)adenylate synthase	-3.17583	-5.27132	-1.98014	3.30029	2.94142	1.01323	0.0875825	0.000112339	0.000182911	1.09201e-08	6.96188e-08
EC:2.7.7.63	Lipoate--protein ligase	3.84944	2.92571	5.5592	2.50463	1.26888	1.84848	0.0327935	7.90358e-14	1.25418e-12	3.97978e-13	8.8028e-12
EC:3.1.1.17	Gluconolactonase	4.52087	3.98486	5.63649	1.63234	0.822105	1.85733	0.0337933	3.56233e-12	4.64497e-11	2.43524e-13	5.77054e-12
EC:3.1.1.41	Cephalosporin-C deacetylase	-2.59214	-4.77999	-1.19211	3.88348	3.12192	1.14791	0.069986	7.28851e-07	3.30346e-06	9.28271e-10	6.83538e-09
EC:3.1.2.4	3-hydroxyisobutyryl-CoA hydrolase	-3.03143	-4.39917	-1.01915	3.90711	3.07493	1.22598	0.0556	5.92911e-08	2.50235e-07	9.9004e-11	8.94934e-10
EC:3.1.26.8	Ribonuclease M5	-2.94509	-4.82854	-1.39306	3.58788	3.19139	1.05507	0.1004	3.44051e-06	1.13703e-05	1.59594e-08	1.0263e-07
EC:3.1.3.1	Alkaline phosphatase	6.22063	5.76702	6.72126	1.1	0.978989	1.03085	0.113977	6.68453e-07	3.91758e-06	4.3197e-08	2.73549e-07
EC:3.1.6.13	Iduronate-2-sulfatase	2.94856	1.48125	5.34866	4.19994	2.55798	1.60011	0.0638	3.7923e-10	3.77866e-09	6.54039e-11	6.57595e-10
EC:3.1.6.14	N-acetylglucosamine-6-sulfatase	-2.49707	-4.81381	0.0783633	5.07042	3.46524	1.37145	0.0498	2.0092e-08	1.16311e-07	1.89864e-11	2.28409e-10
EC:3.1.6.6	Choline-sulfatase	2.98596	1.76396	5.36541	3.80466	1.9319	1.89484	0.0378	9.21678e-15	1.65037e-13	8.24474e-13	1.69814e-11
EC:3.10.1.1	N-sulfoglucosamine sulfohydrolase	-4.87727	-7.11392	-1.02846	6.02078	4.04713	1.42049	0.0617876	6.40401e-07	1.76497e-06	5.01336e-10	3.82217e-09
EC:3.2.1.123	Endoglycosylceramidase	-2.91823	-5.79261	0.846127	6.53906	3.34897	1.92896	0.0218	5.60618e-11	5.14752e-10	3.61292e-14	1.04028e-12
EC:3.2.1.18	Exo-alpha-sialidase	3.97803	2.61871	6.35207	3.77254	1.98322	1.79779	0.0645871	1.55178e-10	1.63978e-09	5.99126e-11	6.15035e-10
EC:3.2.1.4	Cellulase	5.7267	5.25015	7.01813	2.15309	1.73301	1.27669	0.0619876	1.40225e-09	1.29038e-08	4.6988e-11	5.29567e-10
EC:3.2.1.86	6-phospho-beta-glucosidase	-0.692684	-2.1319	0.970849	3.28009	2.12176	1.41661	0.0703859	4.3122e-07	1.503e-06	3.0262e-10	2.6286e-09
EC:3.4.21.107	Peptidase Do	6.12025	5.68288	6.85567	1.2082	0.940969	1.18226	0.0954	1.20569e-08	9.50085e-08	2.60234e-09	2.03786e-08
EC:3.4.21.62	Subtilisin	-4.53954	-6.73982	-2.82667	3.89473	3.36293	1.04996	0.0992	7.34715e-06	2.42875e-05	4.9594e-08	2.71105e-07
EC:3.4.21.96	Lactocepin	-4.5902	-6.95735	-2.51782	4.21282	3.65084	1.0513	0.122775	2.61118e-05	5.55154e-05	2.29624e-07	1.08879e-06
EC:3.5.1.5	Urease	6.5605	5.69558	7.51088	1.47427	1.31512	1.09936	0.119	2.57655e-08	1.93401e-07	3.23319e-08	2.10823e-07
EC:3.5.1.54	Allophanate hydrolase	3.9151	2.91736	5.46986	2.34368	1.43428	1.59194	0.0371926	2.73992e-12	3.64694e-11	1.49432e-12	2.87473e-11
EC:4.1.1.96	Carboxynorspermidine decarboxylase	3.03099	1.92571	5.35712	3.61002	1.74864	2.02134	0.0264	9.18029e-17	2.40668e-15	9.27649e-14	2.52894e-12
EC:4.99.1.3	Sirohydrochlorin cobaltochelatase	4.89222	4.19105	5.85795	1.54765	1.25643	1.16703	0.09978	1.01694e-08	8.12382e-08	6.94593e-09	5.09556e-08
EC:5.1.3.6	UDP-glucuronate 4-epimerase	5.11617	4.59484	5.911	1.30515	1.19927	1.02611	0.1238	2.26825e-07	1.45022e-06	5.77649e-08	3.58835e-07
EC:5.1.3.8	N-acylglucosamine 2-epimerase	-2.10221	-2.99645	-0.744631	2.59015	2.13403	1.12813	0.1166	5.53676e-08	3.6145e-07	1.22693e-07	6.3316e-07
EC:5.3.1.25	L-fucose isomerase	2.91777	1.44881	5.3268	4.11984	2.79433	1.46973	0.055189	3.00853e-11	3.49665e-10	1.10428e-11	1.73734e-10
EC:5.3.3.1	Steroid Delta-isomerase	-1.31801	-3.70351	0.297779	4.14221	2.05205	1.94993	0.0118	4.98009e-09	2.9927e-08	3.39469e-15	1.4299e-13
EC:5.4.2.7	Phosphopentomutase	3.08769	2.14548	5.41578	3.12195	1.49031	1.99912	0.0214	9.1223e-15	1.63263e-13	3.81718e-14	1.16678e-12
EC:5.4.3.2	Lysine 2,3-aminomutase	3.6745	2.68665	5.45324	2.63124	1.38885	1.78702	0.064787	2.82194e-11	3.29907e-10	5.58809e-11	5.91143e-10
EC:5.4.99.17	Squalene--hopene cyclase	3.65573	3.12227	5.48119	2.48624	1.32696	1.68421	0.0652	8.94177e-08	6.14371e-07	5.37152e-11	5.78953e-10
EC:5.4.99.19	16S rRNA pseudouridine(516) synthase	4.86259	4.09294	5.85705	1.67611	1.24267	1.30787	0.0666	1.89625e-10	1.98028e-09	1.39057e-10	1.28756e-09
EC:6.1.1.13	D-alanine--poly(phosphoribitol) ligase	-2.76979	-5.16598	-1.37881	3.97857	3.35654	1.08545	0.0948	9.106e-07	4.18896e-06	5.75175e-09	4.057e-08
EC:6.2.1.20	Long-chain-fatty-acid--[acyl-carrier-protein] ligase	4.24772	3.29756	6.38962	2.91576	1.57184	1.70887	0.0653869	4.07117e-11	4.65442e-10	5.53693e-11	5.82568e-10
EC:6.3.4.6	Urea carboxylase	3.22957	1.7345	5.35869	3.78277	2.2104	1.62184	0.0565887	4.87893e-12	6.25297e-11	1.51855e-11	2.26025e-10
EC:6.4.1.1	Pyruvate carboxylase	4.08433	3.23702	5.54135	2.30171	1.23283	1.76676	0.045	7.66602e-14	1.21764e-12	2.62671e-12	4.81721e-11

## Sheet: ALDEx2_picrust2_KO_results
Metabolic functions of FL and PA communities based on KEGG KO gene database.
Predicted genes were enriched in the FL communities
KO	description	rab.all	rab.win.FL	rab.win.PA	diff.btw	diff.win	effect	overlap	we.ep	we.eBH	wi.ep	wi.eBH
K00004	BDH, butB; (R,R)-butanediol dehydrogenase / meso-butanediol dehydrogenase / diacetyl reductase [EC:1.1.1.4 1.1.1.- 1.1.1.303]	4.84341	6.62855	2.99729	-3.85912	1.34499	-2.64982	0.0574	2.01285e-14	5.15625e-13	2.7744e-11	4.29093e-10
K00007	dalD; D-arabinitol 4-dehydrogenase [EC:1.1.1.11]	2.09529	2.93861	0.499338	-2.37292	2.00226	-1.06484	0.119976	1.30674e-05	3.24114e-05	5.26867e-08	3.02241e-07
K00014	aroE; shikimate dehydrogenase [EC:1.1.1.25]	8.64042	9.07532	7.69273	-1.20794	1.02694	-1.02646	0.159	2.75351e-07	1.60358e-06	1.18945e-06	5.14205e-06
K00019	E1.1.1.30, bdh; 3-hydroxybutyrate dehydrogenase [EC:1.1.1.30]	5.00459	5.36281	4.16375	-1.12579	0.904432	-1.04807	0.14917	1.98712e-06	8.96548e-06	5.1083e-07	2.40307e-06
K00020	mmsB, HIBADH; 3-hydroxyisobutyrate dehydrogenase [EC:1.1.1.31]	8.08337	8.9624	7.20269	-1.8011	0.702772	-2.30779	0.0397921	7.46013e-17	3.234e-15	1.94721e-12	4.55289e-11
K00023	phbB; acetoacetyl-CoA reductase [EC:1.1.1.36]	5.08938	5.56951	4.48947	-0.982869	0.863082	-1.01029	0.139372	2.56423e-06	1.10875e-05	2.99416e-07	1.48644e-06
K00024	mdh; malate dehydrogenase [EC:1.1.1.37]	8.49268	8.80668	7.43321	-1.30187	1.10745	-1.00488	0.158568	6.95051e-07	3.65735e-06	1.42662e-06	6.02227e-06
K00027	ME2, sfcA, maeA; malate dehydrogenase (oxaloacetate-decarboxylating) [EC:1.1.1.38]	6.14988	8.11732	5.05597	-3.17461	0.978067	-3.03172	0.0606	1.71489e-15	5.68088e-14	4.05536e-11	5.43524e-10
K00029	E1.1.1.40, maeB; malate dehydrogenase (oxaloacetate-decarboxylating)(NADP+) [EC:1.1.1.40]	6.84609	7.34527	6.15181	-1.26342	0.981294	-1.27147	0.064	3.42715e-10	3.59877e-09	8.61526e-11	9.43073e-10
K00038	E1.1.1.53; 3alpha(or 20beta)-hydroxysteroid dehydrogenase [EC:1.1.1.53]	4.41549	6.25017	2.52719	-3.76628	1.23954	-2.7327	0.0616	3.71336e-12	5.67375e-11	4.36017e-11	5.71557e-10
K00040	uxuB; fructuronate reductase [EC:1.1.1.57]	3.18289	3.91787	1.95496	-1.87602	1.05509	-1.65012	0.0465907	3.83222e-13	7.1285e-12	2.59202e-12	5.66761e-11
K00055	E1.1.1.90; aryl-alcohol dehydrogenase [EC:1.1.1.90]	4.28857	6.26661	2.46566	-3.845	1.26304	-2.71393	0.0625875	5.60845e-12	8.22852e-11	4.85227e-11	6.07659e-10
K00059	fabG; 3-oxoacyl-[acyl-carrier protein] reductase [EC:1.1.1.100]	10.5122	11.2535	9.33306	-1.84457	0.920004	-1.79997	0.058	2.01131e-13	4.18397e-12	2.25174e-11	3.62833e-10
K00064	E1.1.1.122; D-threo-aldose 1-dehydrogenase [EC:1.1.1.122]	2.06774	2.97513	0.689228	-2.21261	1.24136	-1.62294	0.056	4.18588e-11	4.49875e-10	2.54357e-11	3.79651e-10
K00074	paaH, hbd, fadB, mmgB; 3-hydroxybutyryl-CoA dehydrogenase [EC:1.1.1.157]	7.78696	8.66724	6.57926	-2.1329	0.905967	-2.2569	0.0183963	1.02932e-18	6.92608e-17	9.45503e-15	6.24257e-13
K00075	murB; UDP-N-acetylmuramate dehydrogenase [EC:1.3.1.98]	8.05633	8.88682	6.9679	-1.81682	0.914765	-1.89111	0.0414	6.23322e-15	1.79749e-13	1.20305e-12	3.08877e-11
K00076	hdhA; 7-alpha-hydroxysteroid dehydrogenase [EC:1.1.1.159]	4.60315	6.4024	3.14122	-3.26114	1.18112	-2.54449	0.0586	9.82675e-16	3.40505e-14	1.77722e-11	3.07066e-10
K00088	IMPDH, guaB; IMP dehydrogenase [EC:1.1.1.205]	9.1401	9.69064	7.79701	-1.74155	1.10157	-1.39677	0.0833833	6.92905e-10	6.85795e-09	6.52994e-10	5.65889e-09
K00098	idnD; L-idonate 5-dehydrogenase [EC:1.1.1.264]	3.45434	4.01933	1.68123	-2.30906	1.0951	-1.93038	0.00860005	2.85896e-13	5.52077e-12	1.08908e-15	1.14904e-13
K00100	bdhAB; butanol dehydrogenase [EC:1.1.1.-]	6.61786	8.47334	5.61702	-2.93593	0.823766	-3.4065	0.00440009	5.85651e-24	1.86468e-21	1.44366e-16	2.80791e-14
K00101	lldD; L-lactate dehydrogenase (cytochrome) [EC:1.1.2.3]	6.35096	8.35794	4.74651	-3.62506	0.846403	-4.00403	0.00860005	2.68513e-23	6.4127e-21	5.92796e-16	7.76523e-14
K00102	LDHD, dld; D-lactate dehydrogenase (cytochrome) [EC:1.1.2.4]	4.97593	5.63632	3.31956	-2.46968	1.09168	-2.25252	0.000400951	9.25794e-19	5.96657e-17	2.37545e-17	9.71201e-15
K00103	GULO; L-gulonolactone oxidase [EC:1.1.3.8]	4.29788	6.2594	2.51435	-3.80467	1.3461	-2.5044	0.0644	1.53785e-10	1.71564e-09	4.58182e-11	5.84221e-10
K00108	betA, CHDH; choline dehydrogenase [EC:1.1.99.1]	6.38703	7.93877	4.86074	-3.00261	0.831586	-3.30194	0.00320013	2.58526e-25	1.99551e-22	5.23904e-17	1.49227e-14
K00111	glpA, glpD; glycerol-3-phosphate dehydrogenase [EC:1.1.5.3]	6.52701	8.25246	5.92216	-2.34127	0.633981	-3.49165	0.0359928	1.87164e-20	1.74518e-18	7.45979e-13	2.09242e-11
K00121	frmA, ADH5, adhC; S-(hydroxymethyl)glutathione dehydrogenase / alcohol dehydrogenase [EC:1.1.1.284 1.1.1.1]	7.34956	8.3713	6.13112	-2.21632	0.934181	-2.17621	0.0644	7.45549e-14	1.69918e-12	5.57231e-11	6.72095e-10
K00123	fdoG, fdhF, fdwA; formate dehydrogenase major subunit [EC:1.17.1.9]	5.32818	5.87211	4.7019	-1.15147	0.841975	-1.33628	0.0732	2.71438e-10	2.87453e-09	3.45408e-10	3.16226e-09
K00124	fdoH, fdsB; formate dehydrogenase iron-sulfur subunit	4.30311	4.7026	3.57792	-1.12153	0.800798	-1.32428	0.0968	4.98133e-09	4.04699e-08	3.2905e-09	2.45359e-08
K00126	fdsD; formate dehydrogenase subunit delta [EC:1.17.1.9]	2.83181	3.84437	2.05107	-1.64203	0.955998	-1.60378	0.064987	5.00397e-12	7.17359e-11	7.71794e-11	8.61427e-10
K00127	fdoI, fdsG; formate dehydrogenase subunit gamma	4.20858	4.62173	3.38584	-1.24757	0.873958	-1.32189	0.0969806	8.10703e-09	6.35822e-08	3.60776e-09	2.663e-08
K00130	betB, gbsA; betaine-aldehyde dehydrogenase [EC:1.2.1.8]	6.45333	8.26962	5.38964	-2.91796	0.978835	-2.818	0.0411918	5.10844e-18	3.07696e-16	1.50602e-12	3.70627e-11
K00135	gabD; succinate-semialdehyde dehydrogenase / glutarate-semialdehyde dehydrogenase [EC:1.2.1.16 1.2.1.79 1.2.1.20]	7.80788	8.62643	6.64481	-2.05319	0.981637	-2.05589	0.017	1.3001e-17	7.05695e-16	7.84176e-15	5.44067e-13
K00140	mmsA, iolA, ALDH6A1; malonate-semialdehyde dehydrogenase (acetylating) / methylmalonate-semialdehyde dehydrogenase [EC:1.2.1.18 1.2.1.27]	6.32102	8.28246	5.24867	-3.00499	0.728709	-3.891	0.0184	1.81007e-21	2.1481e-19	1.08731e-14	7.04703e-13
K00163	aceE; pyruvate dehydrogenase E1 component [EC:1.2.4.1]	6.49586	8.41515	5.57438	-2.90247	0.666119	-4.10013	0.00840005	1.71906e-24	7.37116e-22	2.9932e-16	4.72617e-14
K00174	korA, oorA, oforA; 2-oxoglutarate/2-oxoacid ferredoxin oxidoreductase subunit alpha [EC:1.2.7.3 1.2.7.11]	6.08537	7.95344	5.1318	-2.86911	1.00043	-2.78869	0.065187	5.06738e-13	9.59961e-12	5.53784e-11	6.46898e-10
K00175	korB, oorB, oforB; 2-oxoglutarate/2-oxoacid ferredoxin oxidoreductase subunit beta [EC:1.2.7.3 1.2.7.11]	6.08132	7.95251	5.13354	-2.90555	1.0012	-2.80626	0.0644	5.1727e-13	9.77648e-12	5.53784e-11	6.46898e-10
K00208	fabI; enoyl-[acyl-carrier protein] reductase I [EC:1.3.1.9 1.3.1.10]	7.50601	8.56274	6.22758	-2.49825	0.869011	-2.63475	0.0311938	6.80445e-19	4.72287e-17	2.6386e-13	8.99585e-12
K00231	PPOX, hemY; protoporphyrinogen/coproporphyrinogen III oxidase [EC:1.3.3.4 1.3.3.15]	5.91637	7.82568	4.84465	-3.0818	1.14598	-2.54131	0.065187	3.09833e-10	3.2833e-09	5.00226e-11	6.19501e-10
K00242	sdhD, frdD; succinate dehydrogenase / fumarate reductase, membrane anchor subunit	5.14406	5.54784	4.56712	-1.1287	0.995526	-1.08769	0.1048	4.37223e-08	3.01813e-07	7.0999e-09	4.91067e-08
K00244	frdA; fumarate reductase flavoprotein subunit [EC:1.3.5.4]	2.66242	3.75684	1.7234	-2.07732	1.12627	-1.98755	0.00920004	4.9101e-12	5.41677e-11	1.10221e-15	1.16022e-13
K00249	ACADM, acd; acyl-CoA dehydrogenase [EC:1.3.8.7]	7.43808	9.06537	6.61997	-2.42357	0.664518	-3.49444	0.00339944	1.40344e-24	6.4254e-22	1.05004e-16	2.26494e-14
K00253	IVD, ivd; isovaleryl-CoA dehydrogenase [EC:1.3.8.4]	4.27226	4.70878	3.46704	-1.23162	0.791745	-1.45436	0.0763847	3.09018e-10	3.14021e-09	4.16685e-10	3.73737e-09
K00257	mbtN, fadE14; acyl-ACP dehydrogenase [EC:1.3.99.-]	8.35396	9.74863	7.07238	-2.71881	0.703869	-3.59425	0.00599887	2.63181e-24	1.00929e-21	1.72933e-16	3.16794e-14
K00259	ald; alanine dehydrogenase [EC:1.4.1.1]	8.03638	8.86424	7.00967	-1.88533	1.0398	-1.65184	0.0654	1.23275e-12	2.13371e-11	4.11078e-11	5.49289e-10
K00265	gltB; glutamate synthase (NADPH/NADH) large chain [EC:1.4.1.13 1.4.1.14]	8.18634	8.49058	7.00303	-1.41378	1.05137	-1.06121	0.154369	3.8451e-06	1.5774e-05	7.46541e-07	3.41257e-06
K00266	gltD; glutamate synthase (NADPH/NADH) small chain [EC:1.4.1.13 1.4.1.14]	7.792	8.64782	6.25555	-2.53242	0.894362	-2.70617	0.010198	6.65878e-21	6.9169e-19	8.78795e-16	1.02942e-13
K00324	pntA; NAD(P) transhydrogenase subunit alpha [EC:1.6.1.2]	7.93843	8.37246	6.80366	-1.43528	0.943163	-1.28608	0.115577	1.31109e-08	1.00607e-07	2.3074e-08	1.4506e-07
K00325	pntB; NAD(P) transhydrogenase subunit beta [EC:1.6.1.2]	6.95037	7.42349	5.89707	-1.39818	0.839475	-1.40738	0.1054	4.32488e-10	4.44739e-09	1.02288e-08	6.90926e-08
K00330	nuoA; NADH-quinone oxidoreductase subunit A [EC:1.6.5.3]	8.71662	9.03261	7.50648	-1.42991	1.08142	-1.15537	0.1358	4.93349e-08	3.40094e-07	1.96553e-07	1.01673e-06
K00331	nuoB; NADH-quinone oxidoreductase subunit B [EC:1.6.5.3]	8.70813	9.03064	7.50317	-1.41527	1.07048	-1.16335	0.139772	5.07694e-08	3.49097e-07	2.07217e-07	1.06682e-06
K00332	nuoC; NADH-quinone oxidoreductase subunit C [EC:1.6.5.3]	8.69456	9.02735	7.4732	-1.45648	1.10261	-1.15878	0.137173	5.87684e-08	3.98596e-07	2.45915e-07	1.24686e-06
K00333	nuoD; NADH-quinone oxidoreductase subunit D [EC:1.6.5.3]	8.69578	9.02703	7.47356	-1.45323	1.13014	-1.09678	0.1372	5.716e-08	3.8884e-07	2.38688e-07	1.21284e-06
K00335	nuoF; NADH-quinone oxidoreductase subunit F [EC:1.6.5.3]	8.70082	9.00341	7.49098	-1.46794	1.10848	-1.15914	0.131974	3.683e-08	2.6062e-07	1.64463e-07	8.64161e-07
K00337	nuoH; NADH-quinone oxidoreductase subunit H [EC:1.6.5.3]	8.71407	9.03728	7.50456	-1.42687	1.08435	-1.14974	0.134173	4.78135e-08	3.30652e-07	1.95641e-07	1.0126e-06
K00338	nuoI; NADH-quinone oxidoreductase subunit I [EC:1.6.5.3]	8.71759	9.03479	7.47854	-1.46614	1.11719	-1.13571	0.134173	3.9929e-08	2.80565e-07	1.81161e-07	9.43725e-07
K00339	nuoJ; NADH-quinone oxidoreductase subunit J [EC:1.6.5.3]	8.62423	9.03134	7.50255	-1.36488	1.12545	-1.09732	0.1432	1.08669e-07	6.95819e-07	4.2358e-07	2.04712e-06
K00341	nuoL; NADH-quinone oxidoreductase subunit L [EC:1.6.5.3]	8.67536	9.03468	7.51264	-1.3996	1.11506	-1.12338	0.141	7.36974e-08	4.895e-07	2.9699e-07	1.4817e-06
K00342	nuoM; NADH-quinone oxidoreductase subunit M [EC:1.6.5.3]	8.77177	8.97455	7.58332	-1.3996	0.944829	-1.23679	0.124175	3.69868e-08	2.61499e-07	1.10893e-07	6.02035e-07
K00343	nuoN; NADH-quinone oxidoreductase subunit N [EC:1.6.5.3]	8.49874	8.82328	7.45063	-1.22955	1.07477	-1.01526	0.1592	6.47261e-07	3.43482e-06	1.55326e-06	6.47285e-06
K00344	qor, CRYZ; NADPH2:quinone reductase [EC:1.6.5.5]	7.45512	8.63774	6.41266	-2.27748	0.624753	-3.43884	0.0104	1.47083e-23	3.96141e-21	1.12774e-15	1.25117e-13
K00355	NQO1; NAD(P)H dehydrogenase (quinone) [EC:1.6.5.2]	2.16556	3.54047	1.10409	-2.23884	1.6784	-1.24101	0.087	5.24247e-09	3.82118e-08	1.00405e-09	8.28714e-09
K00356	E1.6.99.3; NADH dehydrogenase [EC:1.6.99.3]	5.03887	6.05702	4.06434	-1.80831	1.39125	-1.21602	0.11	3.02645e-09	2.61319e-08	8.86122e-09	6.07452e-08
K00362	nirB; nitrite reductase (NADH) large subunit [EC:1.7.1.15]	5.86325	6.29778	4.75528	-1.59316	0.833543	-1.84202	0.0343931	4.39261e-13	7.99843e-12	3.07377e-13	1.01408e-11
K00363	nirD; nitrite reductase (NADH) small subunit [EC:1.7.1.15]	5.36504	6.04972	5.06448	-1.10114	0.968129	-1.07391	0.0993801	2.95569e-08	2.1071e-07	7.62935e-09	5.23724e-08
K00368	nirK; nitrite reductase (NO-forming) [EC:1.7.2.1]	4.67369	5.24696	3.62233	-1.51189	1.32036	-1.06549	0.107	1.92952e-08	1.43e-07	1.52772e-08	9.89793e-08
K00376	nosZ; nitrous-oxide reductase [EC:1.7.2.4]	2.00932	2.67981	1.21544	-1.47354	1.33482	-1.01522	0.1066	1.04357e-06	4.58233e-06	2.48538e-08	1.4858e-07
K00382	DLD, lpd, pdhD; dihydrolipoamide dehydrogenase [EC:1.8.1.4]	9.58744	10.0561	8.33256	-1.62705	0.97322	-1.50873	0.0705859	1.21158e-11	1.67984e-10	1.39859e-10	1.42856e-09
K00384	trxB, TRR; thioredoxin reductase (NADPH) [EC:1.8.1.9]	9.17038	9.73254	8.14714	-1.37773	1.04364	-1.26724	0.0975805	1.57061e-09	1.44048e-08	6.10577e-09	4.32458e-08
K00392	sir; sulfite reductase (ferredoxin) [EC:1.8.7.1]	7.59872	8.32763	6.22627	-2.11002	1.11928	-1.6535	0.0714	3.1683e-11	4.07499e-10	1.25137e-10	1.29877e-09
K00405	ccoO; cytochrome c oxidase cbb3-type subunit II	4.61528	5.26769	3.88709	-1.57515	1.08653	-1.39783	0.05	1.74887e-11	2.32065e-10	8.14451e-12	1.51532e-10
K00407	ccoQ; cytochrome c oxidase cbb3-type subunit IV	4.13985	4.47714	3.36857	-1.15957	0.901543	-1.22691	0.1036	1.41008e-08	1.05907e-07	1.1029e-08	7.31185e-08
K00411	UQCRFS1, RIP1, petA; ubiquinol-cytochrome c reductase iron-sulfur subunit [EC:1.10.2.2]	5.07364	5.50186	4.47792	-1.17578	0.980339	-1.15352	0.0982	2.86984e-08	2.05475e-07	6.58376e-09	4.6015e-08
K00412	CYTB, petB; ubiquinol-cytochrome c reductase cytochrome b subunit	5.12904	5.61996	4.72852	-1.03396	1.0837	-1.02111	0.0863827	7.51619e-08	4.94498e-07	1.9204e-09	1.48399e-08
K00413	CYC1, CYT1, petC; ubiquinol-cytochrome c reductase cytochrome c1 subunit	5.02692	5.47455	4.3865	-1.22306	1.01662	-1.11962	0.0983803	2.26948e-08	1.6571e-07	3.95394e-09	2.89771e-08
K00425	cydA; cytochrome bd ubiquinol oxidase subunit I [EC:1.10.3.14]	6.47339	7.09977	5.71241	-1.29422	0.858835	-1.39491	0.084	9.69804e-11	1.13703e-09	8.14354e-10	6.92622e-09
K00426	cydB; cytochrome bd ubiquinol oxidase subunit II [EC:1.10.3.14]	6.43716	7.09359	5.73994	-1.25661	0.883737	-1.32218	0.087	1.99925e-10	2.20096e-09	9.32685e-10	7.83359e-09
K00432	gpx; glutathione peroxidase [EC:1.11.1.9]	7.88313	8.70897	6.8817	-1.7966	0.884271	-1.92889	0.0327935	4.62236e-16	1.7203e-14	2.36425e-13	8.16445e-12
K00455	hpaD, hpcB; 3,4-dihydroxyphenylacetate 2,3-dioxygenase [EC:1.13.11.15]	1.31154	2.53048	0.184539	-2.15676	1.75329	-1.12714	0.121376	5.21724e-08	3.34426e-07	6.20752e-08	3.46908e-07
K00459	ncd2, npd; nitronate monooxygenase [EC:1.13.12.16]	6.11727	6.69972	5.57731	-1.21203	0.977528	-1.20665	0.0781844	6.6397e-10	6.56258e-09	6.60182e-10	5.65062e-09
K00480	E1.14.13.1; salicylate hydroxylase [EC:1.14.13.1]	3.72932	4.84565	2.70968	-1.95393	1.6762	-1.14156	0.103779	9.04119e-09	7.08432e-08	1.32887e-08	8.63702e-08
K00499	CMO; choline monooxygenase [EC:1.14.15.7]	2.58323	3.08934	1.68545	-1.39967	1.11482	-1.1287	0.1162	1.3945e-07	8.28313e-07	3.45598e-08	2.0367e-07
K00517	CYP81F; indol-3-yl-methylglucosinolate hydroxylase [EC:1.14.-.-]	7.28048	8.32509	5.97863	-2.37613	1.04235	-2.04717	0.0663867	3.03594e-13	6.07348e-12	7.14598e-11	8.08529e-10
K00518	sodN; nickel superoxide dismutase [EC:1.15.1.1]	5.86115	7.98455	3.27235	-4.66114	1.40527	-2.88471	0.0616	2.26527e-14	5.74414e-13	3.3095e-11	4.8135e-10
K00523	ascD, ddhD, rfbI; CDP-4-dehydro-6-deoxyglucose reductase, E3 [EC:1.17.1.1]	4.86666	5.78401	3.81172	-1.89707	0.902889	-2.08862	0.00860005	4.57234e-17	1.96376e-15	5.45081e-16	7.00674e-14
K00525	E1.17.4.1A, nrdA, nrdE; ribonucleoside-diphosphate reductase alpha chain [EC:1.17.4.1]	8.59996	8.85645	7.59068	-1.22016	1.09798	-1.02656	0.164367	4.41971e-07	2.44754e-06	2.73446e-06	1.04005e-05
K00527	rtpR; ribonucleoside-triphosphate reductase (thioredoxin) [EC:1.17.4.2]	4.37434	5.2669	3.08952	-2.06134	1.51628	-1.25698	0.0985803	1.73536e-09	1.56678e-08	4.77015e-09	3.44122e-08
K00528	fpr; ferredoxin/flavodoxin---NADP+ reductase [EC:1.18.1.2 1.19.1.1]	5.95529	7.80147	5.32513	-2.61376	0.629271	-3.92644	0.0121976	2.66598e-22	4.49323e-20	3.94319e-15	3.12212e-13
K00548	metH, MTR; 5-methyltetrahydrofolate--homocysteine methyltransferase [EC:2.1.1.13]	8.64103	9.2728	7.91299	-1.15109	1.0329	-1.05927	0.136373	8.68845e-08	5.67851e-07	1.78619e-07	9.32348e-07
K00567	ogt, MGMT; methylated-DNA-[protein]-cysteine S-methyltransferase [EC:2.1.1.63]	8.44277	8.77118	7.44645	-1.21258	1.10194	-1.00084	0.163967	6.3584e-07	3.38218e-06	2.40179e-06	9.37154e-06
K00568	ubiG; 2-polyprenyl-6-hydroxyphenyl methylase / 3-demethylubiquinone-9 3-methyltransferase [EC:2.1.1.222 2.1.1.64]	5.62141	6.08838	5.00737	-1.10955	0.781604	-1.31437	0.0913817	8.36751e-10	8.03981e-09	1.5125e-09	1.20711e-08
K00573	E2.1.1.77, pcm; protein-L-isoaspartate(D-aspartate) O-methyltransferase [EC:2.1.1.77]	7.20518	7.61208	6.38322	-1.32426	0.899559	-1.49066	0.0422	1.23047e-11	1.69821e-10	2.50221e-12	5.6239e-11
K00574	cfa; cyclopropane-fatty-acyl-phospholipid synthase [EC:2.1.1.79]	6.18625	6.56488	5.85335	-0.854108	0.790116	-1.08549	0.0886	6.36661e-09	5.1433e-08	1.56257e-09	1.22664e-08
K00575	cheR; chemotaxis protein methyltransferase CheR [EC:2.1.1.80]	6.39031	6.68925	5.59802	-1.094	0.806251	-1.2224	0.0903819	4.19339e-09	3.5137e-08	1.08656e-09	8.96318e-09
K00588	E2.1.1.104; caffeoyl-CoA O-methyltransferase [EC:2.1.1.104]	2.02079	3.35374	1.00968	-2.4182	1.18634	-1.89411	0.0617876	1.73727e-07	9.91174e-07	7.41753e-11	8.24126e-10
K00606	panB; 3-methyl-2-oxobutanoate hydroxymethyltransferase [EC:2.1.2.11]	8.463	8.82911	7.42167	-1.3021	1.05047	-1.09044	0.15037	1.87879e-07	1.13866e-06	6.98048e-07	3.21036e-06
K00615	E2.2.1.1, tktA, tktB; transketolase [EC:2.2.1.1]	8.80762	9.48924	8.22155	-1.09194	0.97752	-1.0267	0.140372	6.91893e-08	4.61785e-07	1.67441e-07	8.7923e-07
K00619	argA; amino-acid N-acetyltransferase [EC:2.3.1.1]	5.38736	7.35128	3.80025	-3.76989	1.18554	-2.93027	0.0625875	6.13762e-15	1.77069e-13	5.26501e-11	6.31453e-10
K00626	E2.3.1.9, atoB; acetyl-CoA C-acetyltransferase [EC:2.3.1.9]	9.28507	10.6755	8.09531	-2.67635	0.746864	-3.35285	0.0167967	3.66701e-22	5.90815e-20	5.26118e-15	3.9805e-13
K00632	fadA, fadI; acetyl-CoA acyltransferase [EC:2.3.1.16]	7.78478	8.67686	6.46363	-2.30614	0.966265	-2.33237	0.0144	3.331e-19	2.45579e-17	3.1754e-15	2.69405e-13
K00648	fabH; 3-oxoacyl-[acyl-carrier-protein] synthase III [EC:2.3.1.180]	9.03947	9.88381	8.40038	-1.30569	1.14048	-1.03654	0.1098	3.95408e-08	2.78227e-07	1.99628e-08	1.2722e-07
K00662	aacC; aminoglycoside 3-N-acetyltransferase [EC:2.3.1.81]	1.45716	2.12993	0.340489	-2.07865	1.95625	-1.04227	0.1096	7.06823e-08	4.5613e-07	2.16835e-08	1.31576e-07
K00666	K00666; fatty-acyl-CoA synthase [EC:6.2.1.-]	8.07322	10.0037	7.04613	-2.93053	0.714416	-3.76377	0.0295941	3.55642e-21	3.93467e-19	8.55296e-14	3.66891e-12
K00674	dapD; 2,3,4,5-tetrahydropyridine-2,6-dicarboxylate N-succinyltransferase [EC:2.3.1.117]	7.81812	8.63543	6.39205	-2.34856	1.05321	-2.1258	0.0226	1.58016e-17	8.3947e-16	2.5957e-14	1.42423e-12
K00681	ggt; gamma-glutamyltranspeptidase / glutathione hydrolase [EC:2.3.2.2 3.4.19.13]	7.46264	8.00749	6.97324	-0.975133	0.676242	-1.40188	0.0439912	8.68463e-12	1.23173e-10	6.27126e-12	1.20094e-10
K00685	ATE1; arginyl-tRNA---protein transferase [EC:2.3.2.8]	4.90619	5.43073	4.06391	-1.29417	1.10736	-1.14758	0.0981804	2.57311e-09	2.24126e-08	3.5324e-09	2.60836e-08
K00737	MGAT3; beta-1,4-mannosyl-glycoprotein beta-1,4-N-acetylglucosaminyltransferase [EC:2.4.1.144]	0.0862872	3.36949	-2.81518	-5.64202	3.87653	-1.3875	0.0591882	1.26204e-08	6.76311e-08	4.57238e-11	5.62248e-10
K00758	deoA, TYMP; thymidine phosphorylase [EC:2.4.2.4]	4.78487	5.60529	3.73733	-2.14448	1.21564	-1.81214	0.00700006	4.43869e-16	1.63871e-14	4.79094e-16	6.46615e-14
K00763	pncB, NAPRT1; nicotinate phosphoribosyltransferase [EC:6.3.4.21]	6.36233	8.02486	5.48979	-2.54069	0.683324	-3.46605	0.021	1.93239e-21	2.26986e-19	2.97984e-14	1.5841e-12
K00768	E2.4.2.21, cobU, cobT; nicotinate-nucleotide--dimethylbenzimidazole phosphoribosyltransferase [EC:2.4.2.21]	7.11032	8.17359	5.52984	-2.68807	0.757137	-3.28786	0.0153969	1.44053e-21	1.76755e-19	6.54532e-15	4.66415e-13
K00784	rnz; ribonuclease Z [EC:3.1.26.11]	6.97716	8.00415	6.42728	-1.46658	1.14469	-1.15079	0.0944	4.73655e-09	3.94889e-08	2.72065e-09	2.07005e-08
K00795	ispA; farnesyl diphosphate synthase [EC:2.5.1.1 2.5.1.10]	5.07633	5.52843	4.48134	-1.21753	0.960149	-1.18575	0.091	8.6779e-09	6.81981e-08	1.90563e-09	1.48956e-08
K00805	hepST; heptaprenyl diphosphate synthase [EC:2.5.1.30]	6.06173	8.06837	4.81567	-3.36492	1.04561	-2.94101	0.0638	5.20062e-16	1.9172e-14	3.61902e-11	5.08734e-10
K00817	hisC; histidinol-phosphate aminotransferase [EC:2.6.1.9]	8.63485	8.97345	7.95442	-0.988215	0.864445	-1.0523	0.1482	2.45704e-07	1.44712e-06	6.84814e-07	3.14928e-06
K00820	glmS, GFPT; glucosamine---fructose-6-phosphate aminotransferase (isomerizing) [EC:2.6.1.16]	8.11079	8.97299	7.09752	-1.73706	0.911641	-1.90812	0.0469906	9.19012e-15	2.54152e-13	2.29432e-12	5.26847e-11
K00822	E2.6.1.18; beta-alanine--pyruvate transaminase [EC:2.6.1.18]	4.04186	4.3844	3.23055	-1.16926	0.858348	-1.23855	0.0992	1.40004e-08	1.02966e-07	6.85437e-09	4.75826e-08
K00826	E2.6.1.42, ilvE; branched-chain amino acid aminotransferase [EC:2.6.1.42]	9.26527	9.83082	8.2852	-1.42105	1.09456	-1.24966	0.0955809	1.82826e-09	1.65379e-08	3.74449e-09	2.76402e-08
K00831	serC, PSAT1; phosphoserine aminotransferase [EC:2.6.1.52]	7.81863	8.66905	6.54801	-2.30362	1.05901	-2.09763	0.0234	2.50024e-17	1.2501e-15	4.48363e-14	2.19909e-12
K00832	tyrB; aromatic-amino-acid transaminase [EC:2.6.1.57]	4.21099	4.54146	3.2362	-1.3027	0.865449	-1.37247	0.0798	1.29015e-09	1.16883e-08	7.00817e-10	5.97878e-09
K00852	rbsK, RBKS; ribokinase [EC:2.7.1.15]	7.61939	8.41431	6.3991	-1.92152	0.969152	-1.81526	0.0703859	9.30938e-12	1.32023e-10	1.28778e-10	1.33512e-09
K00856	E2.7.1.20, ADK; adenosine kinase [EC:2.7.1.20]	4.73113	6.426	3.84158	-2.63161	0.909161	-2.82374	0.012	1.92165e-21	2.20243e-19	3.58555e-15	2.93403e-13
K00857	tdk, TK; thymidine kinase [EC:2.7.1.21]	7.47969	8.39023	5.66443	-2.75964	1.26241	-2.09444	0.0313937	3.58954e-17	1.70227e-15	1.62486e-13	6.1339e-12
K00859	coaE; dephospho-CoA kinase [EC:2.7.1.24]	7.90341	8.73316	6.73293	-2.11555	1.03577	-1.98511	0.0284	1.74533e-16	7.04507e-15	9.53949e-14	3.97966e-12
K00864	glpK, GK; glycerol kinase [EC:2.7.1.30]	7.60492	8.75822	6.69636	-2.0717	0.760924	-2.54611	0.0608	1.13124e-14	3.0667e-13	2.7283e-11	4.25288e-10
K00867	coaA; type I pantothenate kinase [EC:2.7.1.33]	5.6181	7.69899	3.55328	-4.06374	1.05167	-3.35643	0.0617876	1.01644e-15	3.52046e-14	4.07439e-11	5.45228e-10
K00872	thrB1; homoserine kinase [EC:2.7.1.39]	7.80422	8.68552	6.5622	-2.05534	1.13453	-1.69138	0.0604	3.65494e-13	7.17e-12	2.401e-11	3.75129e-10
K00882	fruK; 1-phosphofructokinase [EC:2.7.1.56]	5.62715	7.71215	3.69844	-3.94185	1.04363	-3.3053	0.0536	1.41274e-18	9.31961e-17	1.00698e-11	1.87787e-10
K00886	ppgK; polyphosphate glucokinase [EC:2.7.1.63]	5.97822	7.97518	3.79473	-4.10072	1.24893	-2.95178	0.0619876	8.05502e-15	2.2553e-13	4.05299e-11	5.43353e-10
K00951	relA; GTP pyrophosphokinase [EC:2.7.6.5]	7.87381	8.71393	6.70367	-2.08788	0.9479	-2.14402	0.0132	8.89107e-18	5.02546e-16	2.38798e-15	2.15348e-13
K00955	cysNC; bifunctional enzyme CysN/CysC [EC:2.7.7.4 2.7.1.25]	5.4311	6.71837	4.71421	-2.25133	1.05064	-2.00934	0.0656	1.81056e-08	1.3513e-07	5.5452e-11	6.47572e-10
K00965	galT, GALT; UDPglucose--hexose-1-phosphate uridylyltransferase [EC:2.7.7.12]	7.3698	8.28914	5.74767	-2.64849	1.19596	-2.14098	0.0308	2.98797e-17	1.45637e-15	1.91129e-13	6.89451e-12
K00974	cca; tRNA nucleotidyltransferase (CCA-adding enzyme) [EC:2.7.7.72 3.1.3.- 3.1.4.-]	6.78812	7.38922	6.30727	-1.04727	0.867573	-1.15147	0.0974	3.59674e-09	3.05615e-08	5.30482e-09	3.7875e-08
K00975	glgC; glucose-1-phosphate adenylyltransferase [EC:2.7.7.27]	7.84646	8.43168	6.60444	-1.91474	0.914644	-1.97978	0.0361928	7.79383e-16	2.76924e-14	5.2583e-13	1.56461e-11
K00982	glnE; [glutamine synthetase] adenylyltransferase / [glutamine synthetase]-adenylyl-L-tyrosine phosphorylase [EC:2.7.7.42 2.7.7.89]	5.06498	5.65109	4.59875	-1.13569	0.788485	-1.39944	0.0473905	1.13462e-11	1.55077e-10	5.47721e-12	1.04798e-10
K00990	glnD; [protein-PII] uridylyltransferase [EC:2.7.7.59]	6.33538	8.2007	5.35961	-2.81618	0.675568	-3.86676	0.0363927	8.46279e-21	8.56113e-19	4.88577e-13	1.47752e-11
K00992	murU; N-acetyl-alpha-D-muramate 1-phosphate uridylyltransferase [EC:2.7.7.99]	5.07456	5.54056	4.48264	-1.20292	0.953334	-1.19109	0.0872	7.70496e-09	6.12354e-08	1.73097e-09	1.36347e-08
K01007	pps, ppsA; pyruvate, water dikinase [EC:2.7.9.2]	7.12398	8.27899	6.16445	-2.18431	0.788475	-2.54415	0.0571886	1.2744e-15	4.33916e-14	1.63987e-11	2.87366e-10
K01008	selD, SEPHS; selenide, water dikinase [EC:2.7.9.3]	6.62115	7.25638	5.70377	-1.46964	0.822974	-1.61738	0.08	1.35699e-11	1.85754e-10	6.21761e-10	5.42097e-09
K01011	TST, MPST, sseA; thiosulfate/3-mercaptopyruvate sulfurtransferase [EC:2.8.1.1 2.8.1.2]	6.49953	7.36131	5.60529	-1.7397	0.797679	-2.13227	0.0245951	4.1101e-17	1.90102e-15	4.56341e-14	2.22275e-12
K01031	pcaI; 3-oxoadipate CoA-transferase, alpha subunit [EC:2.8.3.6]	4.34089	4.80534	3.05988	-1.75475	1.00493	-1.65285	0.0322	4.99834e-13	9.23731e-12	2.77506e-13	9.08059e-12
K01032	pcaJ; 3-oxoadipate CoA-transferase, beta subunit [EC:2.8.3.6]	4.3458	4.81663	3.05587	-1.75779	1.01392	-1.6258	0.0293941	4.67672e-13	8.64252e-12	2.69003e-13	8.80352e-12
K01042	selA; L-seryl-tRNA(Ser) seleniumtransferase [EC:2.9.1.1]	4.64292	6.39341	3.88057	-2.65695	1.03301	-2.43942	0.0626	7.42284e-11	8.88843e-10	5.58014e-11	6.50739e-10
K01055	pcaD; 3-oxoadipate enol-lactonase [EC:3.1.1.24]	3.99535	4.52785	3.38972	-1.18791	0.846346	-1.32927	0.0826	6.04659e-10	5.92777e-09	8.57475e-10	7.22428e-09
K01061	E3.1.1.45; carboxymethylenebutenolidase [EC:3.1.1.45]	7.94596	9.02279	6.8723	-2.00089	0.76889	-2.42071	0.0407919	4.34054e-17	2.00355e-15	1.7144e-12	4.12424e-11
K01066	aes; acetyl esterase [EC:3.1.1.-]	6.2814	8.14404	5.29536	-2.88897	0.840442	-3.21341	0.0318	4.22988e-20	3.68029e-18	2.69741e-13	9.13194e-12
K01079	serB, PSPH; phosphoserine phosphatase [EC:3.1.3.3]	6.34962	6.93991	5.07975	-1.98012	1.02185	-1.92693	0.032	1.83723e-15	6.03747e-14	2.34985e-13	8.17731e-12
K01082	cysQ, MET22, BPNT1; 3'(2'), 5'-bisphosphate nucleotidase [EC:3.1.3.7]	7.25445	7.58387	6.28485	-1.4308	0.947569	-1.20822	0.1036	7.91489e-05	0.000216231	4.95628e-09	3.5682e-08
K01092	E3.1.3.25, IMPA, suhB; myo-inositol-1(or 4)-monophosphatase [EC:3.1.3.25]	9.19431	9.46031	7.93725	-1.49728	1.01804	-1.15446	0.116777	1.81978e-06	8.40379e-06	2.92258e-08	1.79197e-07
K01095	pgpA; phosphatidylglycerophosphatase A [EC:3.1.3.27]	5.30663	5.74814	4.58656	-1.23391	0.918157	-1.26061	0.0875825	4.01724e-09	3.37459e-08	1.62236e-09	1.29456e-08
K01101	E3.1.3.41; 4-nitrophenyl phosphatase [EC:3.1.3.41]	4.28837	6.25192	2.41177	-3.8197	1.22692	-2.84914	0.058	8.28567e-16	2.9038e-14	2.70079e-11	4.22464e-10
K01126	E3.1.4.46, glpQ, ugpQ; glycerophosphoryl diester phosphodiesterase [EC:3.1.4.46]	8.62278	9.70858	7.26142	-2.65499	0.883075	-2.80338	0.024	1.15488e-20	1.13445e-18	2.63283e-14	1.4499e-12
K01141	sbcB, exoI; exodeoxyribonuclease I [EC:3.1.11.1]	3.84942	4.74576	3.10932	-2.02062	1.77776	-1.08764	0.103979	1.849e-08	1.36227e-07	5.0437e-09	3.60729e-08
K01142	E3.1.11.2, xthA; exodeoxyribonuclease III [EC:3.1.11.2]	8.60264	8.92328	7.77289	-1.09377	0.904063	-1.00913	0.1634	8.94407e-07	4.5479e-06	2.10178e-06	8.40417e-06
K01151	nfo; deoxyribonuclease IV [EC:3.1.21.2]	5.79926	7.62084	4.7275	-3.13568	1.0936	-2.71925	0.0583883	8.8638e-16	3.11109e-14	2.79441e-11	4.30217e-10
K01174	nuc; micrococcal nuclease [EC:3.1.31.1]	4.78871	6.77202	3.38947	-3.25136	1.30444	-2.28424	0.0631874	6.62847e-09	5.34457e-08	5.16828e-11	6.27364e-10
K01185	E3.2.1.17; lysozyme [EC:3.2.1.17]	1.31641	1.86993	0.190057	-1.61333	1.17509	-1.28385	0.0907818	7.7658e-08	3.57714e-07	7.48124e-09	4.80503e-08
K01192	E3.2.1.25, MANBA, manB; beta-mannosidase [EC:3.2.1.25]	4.00522	4.93598	3.42221	-1.37076	1.39431	-1.00316	0.1408	1.04748e-07	6.67629e-07	3.02019e-07	1.4956e-06
K01223	E3.2.1.86B, bglA; 6-phospho-beta-glucosidase [EC:3.2.1.86]	-0.234229	-2.4292	1.02472	3.61751	3.31355	1.01764	0.103979	3.96941e-06	1.2337e-05	1.49332e-08	9.38125e-08
K01241	amn; AMP nucleosidase [EC:3.2.2.4]	4.85973	5.23415	4.27562	-1.15359	0.900182	-1.21888	0.0783843	2.34323e-09	2.0503e-08	4.21702e-10	3.76218e-09
K01247	alkA; DNA-3-methyladenine glycosylase II [EC:3.2.2.21]	6.13218	6.60687	5.24776	-1.31002	1.05151	-1.2022	0.0869826	5.4859e-10	5.51978e-09	1.0442e-09	8.61919e-09
K01251	E3.3.1.1, ahcY; adenosylhomocysteinase [EC:3.3.1.1]	8.63543	9.01275	7.68912	-1.26913	0.977906	-1.01534	0.144771	7.86597e-07	4.07361e-06	5.6531e-07	2.6556e-06
K01255	CARP, pepA; leucyl aminopeptidase [EC:3.4.11.1]	8.12016	9.02506	6.93701	-2.01533	0.918547	-2.01575	0.0554	4.09643e-14	9.83518e-13	1.4091e-11	2.52968e-10
K01256	pepN; aminopeptidase N [EC:3.4.11.2]	7.00236	7.85312	6.56207	-1.18273	0.945714	-1.18631	0.0898	1.72811e-09	1.56723e-08	1.87637e-09	1.46616e-08
K01259	pip; proline iminopeptidase [EC:3.4.11.5]	5.94418	6.62868	5.44582	-1.30768	1.1125	-1.15785	0.0674	2.44808e-09	2.15121e-08	1.19475e-10	1.24182e-09
K01267	DNPEP; aspartyl aminopeptidase [EC:3.4.11.21]	5.19928	6.40529	3.40682	-3.02034	1.14156	-2.39398	0.059	4.0914e-15	1.23388e-13	1.82003e-11	3.12746e-10
K01278	DPP4, CD26; dipeptidyl-peptidase 4 [EC:3.4.14.5]	6.51443	7.74352	5.94624	-1.8098	1.67076	-1.06876	0.1064	1.53371e-08	1.16243e-07	1.45603e-08	9.51524e-08
K01295	cpg; glutamate carboxypeptidase [EC:3.4.17.11]	5.14948	7.29768	4.32382	-2.92788	0.933233	-2.96357	0.0574	3.61694e-16	1.37454e-14	2.42143e-11	3.87264e-10
K01305	iadA; beta-aspartyl-dipeptidase (metallo-type) [EC:3.4.19.-]	-2.2907	-4.98969	-0.568655	4.15701	3.49911	1.11247	0.116177	1.54272e-05	3.77357e-05	8.31439e-08	4.17179e-07
K01338	lon; ATP-dependent Lon protease [EC:3.4.21.53]	7.92487	8.7817	7.07368	-1.70431	0.74811	-2.18739	0.0276	1.90357e-17	9.85064e-16	1.19123e-13	4.80174e-12
K01354	ptrB; oligopeptidase B [EC:3.4.21.83]	6.31203	7.58212	5.34129	-2.19957	1.3833	-1.51194	0.038	9.35126e-13	1.66408e-11	1.25517e-12	3.17254e-11
K01421	yhgE; putative membrane protein	0.467342	-1.67608	1.39832	3.34686	2.47853	1.24926	0.0808	5.41288e-07	1.70401e-06	7.9283e-10	6.55693e-09
K01426	E3.5.1.4, amiE; amidase [EC:3.5.1.4]	7.26316	8.31401	6.29758	-2.09286	0.767834	-2.71377	0.00759853	5.42374e-22	8.00501e-20	3.84764e-16	5.67409e-14
K01432	AFMID; arylformamidase [EC:3.5.1.9]	3.9312	4.30927	2.46066	-1.83776	1.05386	-1.59622	0.0794	2.51312e-11	3.2191e-10	3.88585e-10	3.54335e-09
K01439	dapE; succinyl-diaminopimelate desuccinylase [EC:3.5.1.18]	6.88693	7.77698	5.53276	-2.23404	0.741251	-2.64256	0.0246	4.21023e-19	3.03164e-17	5.93085e-14	2.72645e-12
K01451	hipO; hippurate hydrolase [EC:3.5.1.32]	6.96758	8.14319	5.55973	-2.59137	0.700177	-3.51733	0.0014003	6.20932e-27	1.99016e-23	1.8151e-17	8.81944e-15
K01457	atzF; allophanate hydrolase [EC:3.5.1.54]	5.32933	4.46783	6.45757	2.00034	1.46758	1.30212	0.0883823	1.3967e-09	1.29105e-08	9.1856e-10	7.71564e-09
K01459	E3.5.1.77; N-carbamoyl-D-amino-acid hydrolase [EC:3.5.1.77]	4.29641	6.23605	2.20642	-4.07429	1.49034	-2.43714	0.0629874	4.10436e-09	3.38776e-08	5.0934e-11	6.20941e-10
K01464	DPYS, dht, hydA; dihydropyrimidinase [EC:3.5.2.2]	4.84117	6.78413	3.79131	-2.98445	0.714079	-3.8425	0.00619883	1.80128e-25	1.65272e-22	2.65373e-16	4.31905e-14
K01478	arcA; arginine deiminase [EC:3.5.3.6]	5.85429	7.7582	3.96938	-3.78797	0.996958	-3.38618	0.0635873	1.37427e-13	2.95653e-12	5.53784e-11	6.46898e-10
K01480	speB; agmatinase [EC:3.5.3.11]	6.57085	7.48885	6.11495	-1.26117	0.972954	-1.11019	0.1166	1.27641e-07	8.03324e-07	3.39213e-08	2.05149e-07
K01483	allA; ureidoglycolate lyase [EC:4.3.2.3]	3.09728	3.68749	2.46948	-1.3126	1.01663	-1.23509	0.0973805	1.27304e-09	1.13975e-08	7.45602e-09	5.01782e-08
K01485	codA; cytosine deaminase [EC:3.5.4.1]	6.47988	7.07884	5.57113	-1.46744	1.04226	-1.31603	0.0909818	7.725e-10	7.54218e-09	2.34418e-09	1.80747e-08
K01488	add, ADA; adenosine deaminase [EC:3.5.4.4]	7.49513	8.33278	5.36893	-2.93016	0.960958	-2.84891	0.00879829	5.51274e-21	5.83478e-19	1.33642e-15	1.35589e-13
K01489	cdd, CDA; cytidine deaminase [EC:3.5.4.5]	7.54021	8.40305	5.8662	-2.56244	1.2128	-2.05231	0.031	5.849e-17	2.6042e-15	1.89404e-13	6.91429e-12
K01494	dcd; dCTP deaminase [EC:3.5.4.13]	8.03914	8.70341	6.93213	-1.85962	0.968904	-1.69958	0.0796	1.738e-10	1.94586e-09	2.79111e-10	2.65215e-09
K01495	GCH1, folE; GTP cyclohydrolase IA [EC:3.5.4.16]	8.14582	9.02878	7.14131	-1.8697	0.988592	-1.81131	0.0347931	4.5101e-15	1.35427e-13	5.0322e-13	1.50852e-11
K01507	ppa; inorganic pyrophosphatase [EC:3.6.1.1]	8.17357	8.84935	7.19729	-1.66735	0.890222	-1.71028	0.0634	1.20788e-12	2.09364e-11	4.9003e-11	6.09707e-10
K01512	acyP; acylphosphatase [EC:3.6.1.7]	7.2724	8.28149	6.28231	-2.04235	0.85341	-2.18035	0.0668	6.61392e-09	5.37662e-08	6.45942e-11	7.32384e-10
K01520	dut, DUT; dUTP pyrophosphatase [EC:3.6.1.23]	7.84477	8.67512	6.4067	-2.3377	0.988348	-2.27368	0.0194	4.02948e-18	2.48525e-16	1.50589e-14	9.24821e-13
K01523	hisE; phosphoribosyl-ATP pyrophosphohydrolase [EC:3.6.1.31]	5.40706	6.73657	4.41835	-2.32165	0.876642	-2.57774	0.00120035	1.42143e-21	1.6787e-19	2.67109e-17	1.04116e-14
K01524	ppx-gppA; exopolyphosphatase / guanosine-5'-triphosphate,3'-diphosphate pyrophosphatase [EC:3.6.1.11 3.6.1.40]	9.10614	9.62313	7.87142	-1.58586	1.09829	-1.2414	0.0982	1.07636e-08	8.40583e-08	5.98187e-09	4.22983e-08
K01525	apaH; bis(5'-nucleosyl)-tetraphosphatase (symmetrical) [EC:3.6.1.41]	4.5624	5.26668	3.74379	-1.64581	1.12599	-1.43646	0.0378	3.46052e-12	5.21686e-11	9.94071e-13	2.50693e-11
K01531	mgtA, mgtB; Mg2+-importing ATPase [EC:3.6.3.2]	2.33218	3.32923	1.61015	-1.61587	1.14701	-1.34005	0.0869826	9.36279e-10	8.67329e-09	1.80274e-09	1.3738e-08
K01535	PMA1, PMA2; H+-transporting ATPase [EC:3.6.3.6]	-1.57562	-0.380352	-2.74621	-2.51338	2.15186	-1.04169	0.108978	1.54898e-05	4.18769e-05	1.66943e-07	6.74229e-07
K01537	E3.6.3.8; Ca2+-transporting ATPase [EC:3.6.3.8]	7.87081	8.63237	6.53005	-2.19477	1.10327	-1.79777	0.0496	3.26402e-14	8.02627e-13	5.08159e-12	1.04137e-10
K01556	KYNU, kynU; kynureninase [EC:3.7.1.3]	7.52019	8.4251	5.61561	-2.83946	1.25583	-2.17368	0.0184	1.03826e-17	5.75966e-16	1.32546e-14	8.33431e-13
K01560	E3.8.1.2; 2-haloacid dehalogenase [EC:3.8.1.2]	5.27268	5.84836	4.70675	-1.23185	0.924951	-1.28328	0.0622	1.81129e-10	1.99972e-09	9.49465e-11	1.02062e-09
K01563	dhaA; haloalkane dehalogenase [EC:3.8.1.5]	5.36461	6.51726	4.15592	-2.39044	1.30242	-1.70447	0.067	9.39471e-06	3.28946e-05	5.54152e-11	6.47235e-10
K01578	MLYCD; malonyl-CoA decarboxylase [EC:4.1.1.9]	4.33416	4.96065	3.34696	-1.55864	0.753061	-1.99334	0.0132	1.40026e-16	5.50176e-15	3.75174e-15	2.86181e-13
K01584	adiA; arginine decarboxylase [EC:4.1.1.19]	4.13238	4.5112	2.80477	-1.67058	0.920441	-1.65633	0.0566	2.86449e-11	3.57898e-10	2.69561e-11	3.78791e-10
K01599	hemE, UROD; uroporphyrinogen decarboxylase [EC:4.1.1.37]	8.04799	8.74019	6.95881	-1.70462	0.893379	-1.79103	0.045191	4.10534e-14	9.85036e-13	3.57035e-12	7.61413e-11
K01607	pcaC; 4-carboxymuconolactone decarboxylase [EC:4.1.1.44]	5.75432	6.21103	4.89826	-1.32949	0.561022	-2.22059	0.000600571	1.19585e-17	6.05298e-16	1.19976e-17	7.57362e-15
K01608	gcl; tartronate-semialdehyde synthase [EC:4.1.1.47]	2.37008	3.13176	1.444	-1.51017	1.36655	-1.0277	0.134573	4.31964e-07	2.30011e-06	2.23047e-07	1.12265e-06
K01623	ALDO; fructose-bisphosphate aldolase, class I [EC:4.1.2.13]	5.13811	6.22938	3.41292	-2.89805	1.46041	-1.82732	0.0759848	3.59175e-12	5.54095e-11	3.76822e-10	3.46464e-09
K01625	eda; 2-dehydro-3-deoxyphosphogluconate aldolase / (4S)-4-hydroxy-2-oxoglutarate aldolase [EC:4.1.2.14 4.1.3.42]	7.37842	8.06338	6.52669	-1.57855	0.906158	-1.63261	0.0681864	4.88772e-12	7.34259e-11	8.31627e-11	9.14436e-10
K01638	aceB, glcB; malate synthase [EC:2.3.3.9]	5.08164	5.4819	4.62918	-1.02616	0.858513	-1.21108	0.0375925	1.48002e-09	1.33808e-08	2.09917e-12	4.52648e-11
K01640	E4.1.3.4, HMGCL, hmgL; hydroxymethylglutaryl-CoA lyase [EC:4.1.3.4]	6.63881	7.53469	6.20169	-1.31557	0.988252	-1.30135	0.0707858	1.40399e-10	1.59719e-09	1.39078e-10	1.41693e-09
K01644	citE; citrate lyase subunit beta / citryl-CoA lyase [EC:4.1.3.34]	6.27603	8.09544	5.40114	-2.72104	0.666438	-3.8447	0.00500008	3.55977e-25	2.48373e-22	2.08479e-16	3.61289e-14
K01652	E2.2.1.6L, ilvB, ilvG, ilvI; acetolactate synthase I/II/III large subunit [EC:2.2.1.6]	8.92659	9.23691	7.87511	-1.35046	0.886382	-1.25791	0.113177	1.26891e-08	9.76325e-08	1.61154e-08	1.04092e-07
K01654	E2.5.1.56, neuB; N-acetylneuraminate synthase [EC:2.5.1.56]	6.15585	6.57023	5.04953	-1.92843	1.41966	-1.35903	0.0518	5.52696e-11	6.79844e-10	6.74226e-12	1.31914e-10
K01659	prpC; 2-methylcitrate synthase [EC:2.3.3.5]	3.34869	4.59102	2.55906	-1.89154	0.951564	-1.86678	0.0268	8.58827e-15	2.24786e-13	1.21153e-13	4.67501e-12
K01664	pabA; para-aminobenzoate synthetase component II [EC:2.6.1.85]	7.05837	8.2817	5.77317	-2.55489	1.21613	-1.84996	0.064987	1.425e-08	1.08683e-07	7.30097e-11	8.15001e-10
K01673	cynT, can; carbonic anhydrase [EC:4.2.1.1]	8.41911	9.31379	7.60758	-1.6222	1.01963	-1.5172	0.0422	5.60488e-13	1.05167e-11	2.43016e-12	5.49798e-11
K01676	E4.2.1.2A, fumA, fumB; fumarate hydratase, class I [EC:4.2.1.2]	8.08388	8.44683	6.84335	-1.54001	1.17822	-1.0411	0.171566	3.76653e-07	2.12236e-06	2.61741e-06	1.00894e-05
K01681	ACO, acnA; aconitate hydratase [EC:4.2.1.3]	8.49549	8.85425	7.42584	-1.26634	1.06524	-1.04621	0.154369	3.18131e-07	1.82446e-06	1.04072e-06	4.56913e-06
K01687	ilvD; dihydroxy-acid dehydratase [EC:4.2.1.9]	8.79087	9.21668	7.78956	-1.27678	0.964425	-1.19335	0.130774	1.29491e-08	9.94232e-08	1.36484e-07	7.2903e-07
K01692	paaF, echA; enoyl-CoA hydratase [EC:4.2.1.17]	8.33556	10.3293	7.21387	-3.13204	0.872806	-3.2827	0.0532	7.86136e-18	4.50896e-16	8.82854e-12	1.69004e-10
K01694	TRP; tryptophan synthase [EC:4.2.1.20]	-0.978797	3.09651	-3.89148	-6.10339	5.12946	-1.06354	0.1238	5.08914e-06	1.42005e-05	7.85483e-08	4.26605e-07
K01702	LEU1; 3-isopropylmalate dehydratase [EC:4.2.1.33]	-0.376239	3.12162	-2.83138	-5.04754	4.20875	-1.13275	0.113777	2.21697e-07	8.68148e-07	4.22312e-08	2.38043e-07
K01703	leuC, IPMI-L; 3-isopropylmalate/(R)-2-methylmalate dehydratase large subunit [EC:4.2.1.33 4.2.1.35]	8.67603	9.0085	7.57353	-1.33546	1.0426	-1.09118	0.15137	1.59546e-07	9.83253e-07	6.59081e-07	3.04549e-06
K01704	leuD, IPMI-S; 3-isopropylmalate/(R)-2-methylmalate dehydratase small subunit [EC:4.2.1.33 4.2.1.35]	8.64105	9.00424	7.55409	-1.33461	1.06747	-1.05054	0.157369	3.39849e-07	1.93636e-06	1.00124e-06	4.41656e-06
K01707	kdgD; 5-dehydro-4-deoxyglucarate dehydratase [EC:4.2.1.41]	3.10469	3.58879	2.32441	-1.34192	1.19893	-1.03955	0.140172	1.60184e-07	9.64993e-07	2.74249e-07	1.34929e-06
K01708	garD; galactarate dehydratase [EC:4.2.1.42]	3.78064	4.19363	2.42071	-1.74836	0.931346	-1.70684	0.0766	9.55744e-12	1.3209e-10	2.68741e-10	2.54616e-09
K01713	pheC; cyclohexadienyl dehydratase [EC:4.2.1.51 4.2.1.91]	2.86058	3.45316	1.61258	-1.82987	1.18677	-1.46881	0.0529894	6.38602e-12	9.0194e-11	1.77375e-11	2.61233e-10
K01714	dapA; 4-hydroxy-tetrahydrodipicolinate synthase [EC:4.3.3.7]	9.07088	9.55236	8.10013	-1.29692	0.909505	-1.34897	0.0904	1.43595e-10	1.63213e-09	2.81356e-09	2.13553e-08
K01716	fabA; 3-hydroxyacyl-[acyl-carrier protein] dehydratase / trans-2-decenoyl-[acyl-carrier protein] isomerase [EC:4.2.1.59 5.3.3.14]	3.45001	4.45116	2.88963	-2.02121	1.69308	-1.10989	0.112977	8.56056e-09	6.7307e-08	2.73458e-08	1.66681e-07
K01719	hemD, UROS; uroporphyrinogen-III synthase [EC:4.2.1.75]	8.17951	9.04039	7.0811	-1.82305	0.979478	-1.69114	0.0341932	3.60241e-14	8.76168e-13	5.172e-13	1.55212e-11
K01720	prpD; 2-methylcitrate dehydratase [EC:4.2.1.79]	3.32096	4.51923	2.78068	-1.74822	1.19306	-1.28341	0.0839832	5.35061e-08	3.6121e-07	7.48782e-10	6.34794e-09
K01740	metY; O-acetylhomoserine (thiol)-lyase [EC:2.5.1.49]	8.19039	8.82908	7.30866	-1.18546	1.09908	-1.02452	0.147371	2.66874e-07	1.55944e-06	6.07645e-07	2.84108e-06
K01760	metC; cystathionine beta-lyase [EC:4.4.1.8]	5.91551	7.06934	5.51484	-1.46406	1.27319	-1.10418	0.108	8.84166e-09	7.00633e-08	1.0123e-08	6.81629e-08
K01772	hemH, FECH; protoporphyrin/coproporphyrin ferrochelatase [EC:4.99.1.1 4.99.1.9]	8.29462	8.92176	7.56347	-1.36866	0.995845	-1.24565	0.0989802	6.62936e-09	5.38803e-08	4.2387e-09	3.08751e-08
K01779	racD; aspartate racemase [EC:5.1.1.13]	4.14377	4.4917	3.26251	-1.30275	0.861436	-1.45578	0.0492	4.61707e-11	5.34384e-10	7.00817e-12	1.31084e-10
K01790	rfbC, rmlC; dTDP-4-dehydrorhamnose 3,5-epimerase [EC:5.1.3.13]	8.20448	8.83535	7.2586	-1.56951	0.840393	-1.71504	0.0583883	2.52686e-13	5.1349e-12	1.90721e-11	3.22403e-10
K01796	E5.1.99.4, AMACR, mcr; alpha-methylacyl-CoA racemase [EC:5.1.99.4]	5.82354	7.86018	4.63359	-3.32253	1.07075	-2.90779	0.065	1.97045e-13	4.1024e-12	5.53784e-11	6.46898e-10
K01801	nagL; maleylpyruvate isomerase [EC:5.2.1.4]	3.97736	4.37904	2.95866	-1.42863	0.826061	-1.59731	0.0812	5.2897e-11	6.34469e-10	6.58944e-10	5.71571e-09
K01802	E5.2.1.8; peptidylprolyl isomerase [EC:5.2.1.8]	8.98692	9.40026	7.82996	-1.50324	1.1691	-1.05613	0.1248	8.39065e-07	4.31181e-06	8.4251e-08	4.69203e-07
K01834	PGAM, gpmA; 2,3-bisphosphoglycerate-dependent phosphoglycerate mutase [EC:5.4.2.11]	6.37798	8.22239	5.35756	-2.8816	0.823562	-3.28446	0.0323935	4.50295e-20	3.89873e-18	2.61025e-13	8.92404e-12
K01840	manB; phosphomannomutase [EC:5.4.2.8]	7.73173	8.5805	6.548	-2.09048	1.15104	-1.83645	0.036	2.1932e-15	7.10686e-14	5.84775e-13	1.7148e-11
K01845	hemL; glutamate-1-semialdehyde 2,1-aminomutase [EC:5.4.3.8]	8.86345	9.3569	7.84956	-1.42205	1.04801	-1.19854	0.1278	1.44427e-08	1.09973e-07	4.39316e-08	2.59312e-07
K01848	E5.4.99.2A, mcmA1; methylmalonyl-CoA mutase, N-terminal domain [EC:5.4.99.2]	5.74285	7.54362	4.77963	-2.96112	1.16094	-2.40833	0.0654	3.10862e-09	2.67601e-08	5.53784e-11	6.46898e-10
K01849	E5.4.99.2B, mcmA2; methylmalonyl-CoA mutase, C-terminal domain [EC:5.4.99.2]	5.75813	7.52442	4.6832	-3.04254	1.17924	-2.39857	0.0612	1.9809e-09	1.77399e-08	5.53784e-11	6.46898e-10
K01857	pcaB; 3-carboxy-cis,cis-muconate cycloisomerase [EC:5.5.1.2]	3.51785	3.92546	2.65105	-1.37312	1.15368	-1.14873	0.113577	6.20892e-09	4.96861e-08	3.28646e-08	1.96763e-07
K01858	INO1, ISYNA1; myo-inositol-1-phosphate synthase [EC:5.5.1.4]	6.1661	8.13145	4.65205	-3.60411	1.12923	-2.92347	0.0632	8.58487e-13	1.54099e-11	4.30088e-11	5.65898e-10
K01895	ACSS, acs; acetyl-CoA synthetase [EC:6.2.1.1]	8.75969	9.18168	7.85267	-1.24006	1.08039	-1.03178	0.1506	3.29092e-07	1.88121e-06	7.12503e-07	3.26539e-06
K01897	ACSL, fadD; long-chain acyl-CoA synthetase [EC:6.2.1.3]	8.89184	10.0077	7.94348	-2.16306	0.761005	-2.69311	0.0369926	5.53357e-19	3.9171e-17	6.16304e-13	1.79198e-11
K01903	sucC; succinyl-CoA synthetase beta subunit [EC:6.2.1.5]	8.47093	8.81293	7.43179	-1.26337	1.08182	-1.00055	0.165967	7.8269e-07	4.05379e-06	1.81283e-06	7.38868e-06
K01907	AACS, acsA; acetoacetyl-CoA synthetase [EC:6.2.1.16]	6.69406	7.7989	4.26334	-3.42226	1.08041	-2.57817	0.04	3.71075e-17	1.74969e-15	1.1963e-12	3.0731e-11
K01908	prpE; propionyl-CoA synthetase [EC:6.2.1.17]	5.13235	5.50538	4.57267	-1.48388	1.28507	-1.14494	0.0694	1.47105e-09	1.35033e-08	1.68098e-10	1.65916e-09
K01915	glnA, GLUL; glutamine synthetase [EC:6.3.1.2]	9.49905	10.0678	8.47621	-1.39692	1.04524	-1.20734	0.109578	1.047e-08	8.19144e-08	2.26098e-08	1.41999e-07
K01919	gshA; glutamate--cysteine ligase [EC:6.3.2.2]	5.47048	5.90172	4.89593	-1.05972	0.943083	-1.05157	0.128	1.57426e-07	9.61107e-07	1.39701e-07	7.42048e-07
K01924	murC; UDP-N-acetylmuramate--alanine ligase [EC:6.3.2.8]	8.05552	8.71467	6.95102	-1.72449	0.885242	-1.86762	0.0423915	1.06137e-14	2.89363e-13	1.73883e-12	4.15181e-11
K01926	rex; redox-sensing transcriptional repressor	5.94585	7.82374	5.13661	-2.85342	1.05421	-2.6579	0.0613877	8.16967e-14	1.8454e-12	5.53784e-11	6.46898e-10
K01938	fhs; formate--tetrahydrofolate ligase [EC:6.3.4.3]	4.91873	6.64127	3.99829	-2.65299	0.852235	-2.92724	0.0482	8.44677e-18	4.77222e-16	4.42534e-12	9.23184e-11
K01953	asnB, ASNS; asparagine synthase (glutamine-hydrolysing) [EC:6.3.5.4]	8.25128	9.0005	7.32399	-1.58205	1.00477	-1.46143	0.059788	9.22399e-12	1.3103e-10	2.41176e-11	3.778e-10
K01966	PCCB, pccB; propionyl-CoA carboxylase beta chain [EC:6.4.1.3 2.1.3.15]	7.61186	8.48442	6.19531	-2.36293	1.15587	-1.99278	0.0242	1.7672e-16	7.13004e-15	4.95823e-14	2.35943e-12
K01968	E6.4.1.4A; 3-methylcrotonyl-CoA carboxylase alpha subunit [EC:6.4.1.4]	4.34434	4.72487	3.69331	-1.05123	0.797487	-1.22333	0.0971806	9.22334e-09	7.08333e-08	5.47318e-09	3.86531e-08
K01969	E6.4.1.4B; 3-methylcrotonyl-CoA carboxylase beta subunit [EC:6.4.1.4]	4.59208	4.93828	3.97853	-0.962392	0.654728	-1.37157	0.0584	2.36295e-09	1.99964e-08	5.01351e-11	5.98668e-10
K01975	thpR; RNA 2',3'-cyclic 3'-phosphodiesterase [EC:3.1.4.58]	6.19588	8.20424	5.31745	-2.83776	0.730508	-3.6598	0.0488	5.25538e-19	3.72688e-17	5.65349e-12	1.1431e-10
K01990	ABC-2.A; ABC-2 type transport system ATP-binding protein	10.8125	11.2541	9.9326	-1.30179	1.02163	-1.10831	0.1338	1.29809e-07	8.17466e-07	1.50719e-07	8.0021e-07
K01993	ABC-2.TX; HlyD family secretion protein	5.48819	5.9661	4.92796	-1.1734	1.08075	-1.05803	0.0888	1.9887e-08	1.46955e-07	2.17915e-09	1.68383e-08
K01995	livG; branched-chain amino acid transport system ATP-binding protein	8.25007	9.12474	7.1868	-2.06834	0.696917	-2.92465	1.40363e-05	3.86781e-24	1.32623e-21	8.59423e-18	7.11184e-15
K01996	livF; branched-chain amino acid transport system ATP-binding protein	8.26419	9.18944	7.23006	-2.05889	0.678057	-3.01637	1.40363e-05	6.67e-25	3.75387e-22	8.59423e-18	7.11184e-15
K01997	livH; branched-chain amino acid transport system permease protein	8.25873	9.08547	7.10021	-2.1259	0.70547	-2.98508	1.40363e-05	5.2735e-24	1.68478e-21	8.59423e-18	7.11184e-15
K01998	livM; branched-chain amino acid transport system permease protein	8.27195	9.16808	7.23252	-2.04374	0.680528	-2.98438	1.40363e-05	1.48315e-24	6.55716e-22	8.59423e-18	7.11184e-15
K01999	livK; branched-chain amino acid transport system substrate-binding protein	8.28192	9.03635	7.2174	-1.9311	0.667858	-2.91375	1.40363e-05	2.17166e-22	3.64264e-20	8.59423e-18	7.11184e-15
K02004	ABC.CD.P; putative ABC transport system permease protein	10.1244	10.6498	9.38603	-1.19135	0.900023	-1.2332	0.0971806	2.13191e-09	1.90033e-08	3.47303e-09	2.59004e-08
K02006	cbiO; cobalt/nickel transport system ATP-binding protein	5.27549	7.31132	3.64371	-3.79817	1.14567	-3.1402	0.0579884	4.34184e-17	1.99969e-15	1.9326e-11	3.25239e-10
K02007	cbiM; cobalt/nickel transport system permease protein	5.59405	7.52198	4.03165	-3.737	1.25667	-2.83559	0.0593881	1.47001e-16	6.01118e-15	2.26257e-11	3.62126e-10
K02008	cbiQ; cobalt/nickel transport system permease protein	4.19898	5.09336	3.26252	-2.17515	1.45366	-1.49192	0.0544	9.87997e-12	1.38735e-10	1.0401e-11	1.92338e-10
K02009	cbiN; cobalt/nickel transport protein	3.58068	4.84048	2.04739	-3.04006	1.56729	-1.86687	0.0484	1.07396e-14	2.90703e-13	3.87816e-12	8.17236e-11
K02012	afuA, fbpA; iron(III) transport system substrate-binding protein	7.03665	7.6345	6.26454	-1.36942	0.498196	-2.65116	0.026	1.72248e-19	1.30106e-17	6.26856e-14	2.85449e-12
K02015	ABC.FEV.P; iron complex transport system permease protein	7.71322	8.51579	6.76279	-1.86198	0.79809	-2.30558	0.0135973	6.06054e-19	4.24244e-17	2.20951e-15	2.01043e-13
K02016	ABC.FEV.S; iron complex transport system substrate-binding protein	8.27632	9.26028	6.99855	-2.37878	0.749883	-3.02977	0.0114	4.25022e-22	6.61541e-20	1.59674e-15	1.61751e-13
K02017	modC; molybdate transport system ATP-binding protein [EC:3.6.3.29]	6.22081	8.22627	5.38478	-2.77064	0.653192	-3.93199	0.0329934	6.00081e-21	6.27851e-19	3.84601e-13	1.21701e-11
K02020	modA; molybdate transport system substrate-binding protein	8.02008	8.32288	7.04266	-1.14046	0.87761	-1.01331	0.1678	4.10667e-06	1.66105e-05	3.80926e-06	1.36466e-05
K02025	ABC.MS.P; multiple sugar transport system permease protein	6.61333	7.25649	6.17754	-0.910858	0.812708	-1.05199	0.122575	1.94461e-07	1.16908e-06	5.49761e-08	3.17826e-07
K02026	ABC.MS.P1; multiple sugar transport system permease protein	6.60521	7.19685	6.16109	-0.899715	0.792352	-1.0615	0.119176	1.89243e-07	1.13919e-06	4.83724e-08	2.82825e-07
K02027	ABC.MS.S; multiple sugar transport system substrate-binding protein	6.68338	7.34503	6.25719	-0.910406	0.809028	-1.03524	0.126575	2.25955e-07	1.33669e-06	8.73968e-08	4.84249e-07
K02028	ABC.PA.A; polar amino acid transport system ATP-binding protein [EC:3.6.3.21]	7.63495	8.99592	6.13028	-2.77933	0.874058	-2.98025	0.00319949	1.53716e-23	4.05401e-21	9.87306e-17	2.19553e-14
K02029	ABC.PA.P; polar amino acid transport system permease protein	7.8893	8.47556	6.36789	-2.09476	0.760572	-2.5965	1.40363e-05	2.34236e-20	2.11961e-18	8.59423e-18	7.11184e-15
K02030	ABC.PA.S; polar amino acid transport system substrate-binding protein	8.34179	9.28623	7.46462	-1.81117	0.716018	-2.40826	0.0142	1.04126e-19	8.32523e-18	4.65003e-15	3.56559e-13
K02031	ABC.PE.A; peptide/nickel transport system ATP-binding protein	8.70639	9.23313	7.31883	-1.79059	0.902539	-1.64082	0.0875825	1.0107e-11	1.42291e-10	1.22639e-09	1.00334e-08
K02032	ABC.PE.A1; peptide/nickel transport system ATP-binding protein	9.16393	9.60887	7.91295	-1.60303	0.871706	-1.56625	0.0706	4.72479e-12	7.12018e-11	1.01981e-10	1.08625e-09
K02033	ABC.PE.P; peptide/nickel transport system permease protein	8.69193	9.98239	7.54678	-2.40853	0.640884	-3.46818	0.0127975	7.25032e-22	1.01917e-19	2.78132e-15	2.42641e-13
K02034	ABC.PE.P1; peptide/nickel transport system permease protein	8.71257	9.9884	7.56998	-2.39165	0.640867	-3.44579	0.0134	8.31678e-22	1.13346e-19	2.61799e-15	2.32497e-13
K02035	ABC.PE.S; peptide/nickel transport system substrate-binding protein	8.7686	9.93776	7.60462	-2.3375	0.596044	-3.6041	0.010198	5.84016e-23	1.21632e-20	8.65835e-16	1.02643e-13
K02039	phoU; phosphate transport system protein	8.2575	8.64958	7.08611	-1.37142	1.17761	-1.01881	0.1628	6.52312e-07	3.45981e-06	2.14772e-06	8.55902e-06
K02045	cysA; sulfate transport system ATP-binding protein [EC:3.6.3.25]	4.2167	4.56387	3.45224	-0.983237	0.863263	-1.04514	0.1246	1.312e-07	7.95389e-07	1.0086e-07	5.42544e-07
K02046	cysU; sulfate transport system permease protein	4.22362	4.56844	3.52355	-0.901846	0.834851	-1.00245	0.1284	2.01497e-07	1.17586e-06	1.93605e-07	9.81732e-07
K02047	cysW; sulfate transport system permease protein	4.22361	4.56991	3.52945	-0.90904	0.829876	-1.00341	0.1332	1.96692e-07	1.14856e-06	1.99413e-07	1.00883e-06
K02049	ABC.SN.A; NitT/TauT family transport system ATP-binding protein	8.81153	9.25403	7.64245	-1.48096	0.814878	-1.51388	0.0876	3.77008e-11	4.77328e-10	1.3111e-09	1.0697e-08
K02050	ABC.SN.P; NitT/TauT family transport system permease protein	8.63051	8.91564	7.61281	-1.19143	0.776515	-1.26919	0.124775	8.22064e-09	6.54968e-08	5.84625e-08	3.36395e-07
K02051	ABC.SN.S; NitT/TauT family transport system substrate-binding protein	8.31957	8.5787	7.4157	-1.07972	0.665671	-1.3412	0.1158	1.15523e-08	8.93207e-08	4.25398e-08	2.52553e-07
K02052	ABC.SP.A; putative spermidine/putrescine transport system ATP-binding protein	6.4364	7.35876	4.92586	-2.39045	0.847946	-2.78067	0.000800359	7.20322e-23	1.42303e-20	1.67416e-17	8.55831e-15
K02053	ABC.SP.P; putative spermidine/putrescine transport system permease protein	5.80022	6.46337	4.48195	-2.00123	0.839489	-2.31161	0.00179987	3.32197e-18	1.90881e-16	2.57139e-17	1.00108e-14
K02054	ABC.SP.P1; putative spermidine/putrescine transport system permease protein	5.66092	6.08223	4.32796	-1.87155	1.03026	-1.80346	0.0153969	1.07999e-14	2.85805e-13	5.00812e-15	3.73392e-13
K02055	ABC.SP.S; putative spermidine/putrescine transport system substrate-binding protein	5.85578	6.38295	4.73785	-1.69833	0.823721	-2.06281	0.00340012	3.70846e-17	1.67915e-15	8.67502e-17	1.97817e-14
K02056	ABC.SS.A; simple sugar transport system ATP-binding protein [EC:3.6.3.17]	7.03217	8.22494	5.73967	-2.52858	0.811086	-3.08235	0.00180023	1.0102e-24	4.99481e-22	3.40675e-17	1.21563e-14
K02057	ABC.SS.P; simple sugar transport system permease protein	7.96246	9.08214	6.1328	-2.89528	0.937693	-2.99124	0.00220019	5.13753e-23	1.08511e-20	3.38269e-17	1.2098e-14
K02062	thiQ; thiamine transport system ATP-binding protein	2.48248	3.3067	1.51043	-1.97396	1.21225	-1.59261	0.0335933	3.06319e-12	4.22008e-11	3.98412e-13	1.22387e-11
K02063	thiP; thiamine transport system permease protein	3.27914	3.82345	2.75693	-1.02673	0.904143	-1.09995	0.10058	1.31065e-08	9.70799e-08	9.92063e-09	6.37741e-08
K02064	thiB, tbpA; thiamine transport system substrate-binding protein	3.2827	3.82316	2.76184	-1.02801	0.897052	-1.10945	0.0989802	1.27242e-08	9.4144e-08	1.0205e-08	6.5395e-08
K02078	acpP; acyl carrier protein	9.15343	9.76515	8.27037	-1.3488	1.05268	-1.24547	0.0994	1.21756e-09	1.14412e-08	6.16221e-09	4.37173e-08
K02193	ccmA; heme exporter protein A [EC:3.6.3.41]	6.48261	7.13165	5.06674	-2.0744	0.930525	-1.95763	0.0676	1.01122e-09	9.65044e-09	8.41101e-11	9.19076e-10
K02194	ccmB; heme exporter protein B	6.67623	7.2126	5.45888	-1.87206	0.827386	-2.05329	0.0678	2.66828e-09	2.33106e-08	7.31128e-11	8.1405e-10
K02195	ccmC; heme exporter protein C	6.67345	7.34542	5.48612	-1.93288	0.831426	-2.09827	0.0669866	1.70927e-09	1.55366e-08	7.21327e-11	8.04703e-10
K02197	ccmE; cytochrome c-type biogenesis protein CcmE	6.68128	7.34238	5.45442	-1.95796	0.840779	-2.11871	0.0656	1.22889e-09	1.15214e-08	7.21411e-11	8.04864e-10
K02198	ccmF; cytochrome c-type biogenesis protein CcmF	6.68917	7.36276	5.48925	-1.94026	0.843032	-2.09872	0.0673865	1.188e-09	1.11746e-08	7.14836e-11	7.9853e-10
K02199	ccmG, dsbE; cytochrome c biogenesis protein CcmG, thiol:disulfide interchange protein DsbE	6.74073	7.85464	5.39959	-2.48816	1.09187	-2.09039	0.065	2.73542e-10	2.93811e-09	5.75667e-11	6.6694e-10
K02200	ccmH; cytochrome c-type biogenesis protein CcmH	6.69495	7.56551	5.33142	-2.17074	0.797166	-2.43754	0.0669866	1.14106e-11	1.58933e-10	6.2602e-11	7.13842e-10
K02203	thrH; phosphoserine / homoserine phosphotransferase [EC:3.1.3.3 2.7.1.39]	4.33384	6.29749	2.78435	-3.68086	1.18098	-2.85881	0.0592	1.05037e-15	3.60145e-14	2.49672e-11	3.9637e-10
K02204	thrB2; homoserine kinase type II [EC:2.7.1.39]	4.71363	5.27425	3.44499	-1.7854	0.86313	-1.98622	0.0168	3.44539e-15	9.29039e-14	1.18607e-14	7.31789e-13
K02217	ftnA, ftn; ferritin [EC:1.16.3.2]	5.81341	6.89148	5.19695	-1.4702	1.32054	-1.06014	0.1248	2.33498e-08	1.70968e-07	6.1535e-08	3.52602e-07
K02221	yggT; YggT family protein	7.88357	8.42055	6.80025	-1.67596	0.951304	-1.51692	0.083	8.40507e-10	8.166e-09	8.42236e-10	7.17389e-09
K02224	cobB-cbiA; cobyrinic acid a,c-diamide synthase [EC:6.3.5.9 6.3.5.11]	6.85695	7.71241	5.73327	-2.03226	0.741356	-2.51918	0.0567886	3.68753e-16	1.39757e-14	1.85718e-11	3.04776e-10
K02226	cobC, phpB; alpha-ribazole phosphatase [EC:3.1.3.73]	5.45847	5.90552	4.55767	-1.56452	1.31241	-1.21885	0.0711858	2.26199e-09	1.99434e-08	1.39746e-10	1.43267e-09
K02227	cbiB, cobD; adenosylcobinamide-phosphate synthase [EC:6.3.1.10]	6.98956	8.23673	5.94602	-2.27233	0.649649	-3.14073	0.0237953	8.82842e-21	8.86467e-19	3.29228e-14	1.71655e-12
K02231	cobP, cobU; adenosylcobinamide kinase / adenosylcobinamide-phosphate guanylyltransferase [EC:2.7.1.156 2.7.7.62]	7.41013	8.33719	6.16818	-2.1804	0.772729	-2.54326	0.0466	1.53793e-16	6.27441e-15	4.87163e-12	1.00417e-10
K02232	cobQ, cbiP; adenosylcobyric acid synthase [EC:6.3.5.10]	6.9696	8.20989	5.78573	-2.41169	0.763699	-2.83018	0.04979	2.21618e-17	1.12457e-15	4.70859e-12	9.75918e-11
K02233	E2.7.8.26, cobS, cobV; adenosylcobinamide-GDP ribazoletransferase [EC:2.7.8.26]	7.43896	8.42649	6.24544	-2.21574	0.734077	-2.74318	0.0517896	1.27052e-16	5.26477e-15	8.89601e-12	1.69757e-10
K02237	comEA; competence protein ComEA	6.19537	8.1869	5.40519	-2.71511	0.68465	-3.77272	0.0306	1.66897e-21	2.00029e-19	1.72016e-13	6.40755e-12
K02238	comEC; competence protein ComEC	7.95874	8.75861	6.88425	-1.90135	0.885988	-2.03344	0.037	4.75331e-16	1.76528e-14	6.10683e-13	1.78473e-11
K02276	coxC, ctaE; cytochrome c oxidase subunit III [EC:1.9.3.1]	8.65617	9.47351	7.70032	-1.75227	1.04181	-1.53819	0.0615877	2.80816e-12	4.45849e-11	3.31239e-11	4.71672e-10
K02277	coxD, ctaF; cytochrome c oxidase subunit IV [EC:1.9.3.1]	5.08298	6.51897	4.1887	-2.46561	1.14172	-2.00472	0.0636	4.58379e-06	1.8011e-05	5.53784e-11	6.46898e-10
K02283	cpaF, tadA; pilus assembly protein CpaF	6.79027	8.08762	5.69337	-2.51536	0.898967	-2.67702	0.0619876	4.32307e-13	8.33406e-12	4.07027e-11	5.44849e-10
K02298	cyoB; cytochrome o ubiquinol oxidase subunit I [EC:1.10.3.10]	4.68094	6.34881	3.18152	-3.18606	0.912838	-3.25769	0.00499908	2.71161e-24	1.00272e-21	1.01189e-16	2.25732e-14
K02299	cyoC; cytochrome o ubiquinol oxidase subunit III	4.90181	6.49444	3.6911	-2.84469	0.881867	-2.97978	0.0111978	1.83841e-22	3.25686e-20	7.78448e-16	9.39064e-14
K02302	cysG; uroporphyrin-III C-methyltransferase / precorrin-2 dehydrogenase / sirohydrochlorin ferrochelatase [EC:2.1.1.107 1.3.1.76 4.99.1.4]	4.79403	5.69465	4.07576	-1.60818	0.670766	-2.17243	0.0665867	2.67393e-10	2.85468e-09	8.67905e-11	9.45242e-10
K02303	cobA; uroporphyrin-III C-methyltransferase [EC:2.1.1.107]	7.06007	8.13394	6.36766	-1.63814	1.08368	-1.39917	0.0754	2.74745e-11	3.56646e-10	2.21584e-10	2.15224e-09
K02304	MET8; precorrin-2 dehydrogenase / sirohydrochlorin ferrochelatase [EC:1.3.1.76 4.99.1.4]	6.48989	7.42737	5.17728	-2.26432	1.31962	-1.7094	0.0433913	4.16108e-14	9.96972e-13	2.90032e-12	6.4158e-11
K02335	polA; DNA polymerase I [EC:2.7.7.7]	8.9767	9.45766	7.79966	-1.52022	1.11562	-1.17199	0.120776	2.29766e-08	1.68764e-07	2.86034e-08	1.75657e-07
K02342	dnaQ; DNA polymerase III subunit epsilon [EC:2.7.7.7]	9.24887	10.0299	8.55656	-1.38271	1.09605	-1.1853	0.0964	1.45563e-09	1.34471e-08	2.79232e-09	2.12822e-08
K02351	K02351; putative membrane protein	2.20009	3.08417	0.767597	-2.13158	1.70637	-1.08894	0.122	7.01267e-07	3.56294e-06	6.64921e-08	3.74909e-07
K02358	tuf, TUFM; elongation factor Tu	8.68156	9.07717	7.87458	-1.08441	0.909037	-1.0926	0.140972	1.03105e-07	6.62729e-07	3.6051e-07	1.76579e-06
K02371	fabK; enoyl-[acyl-carrier protein] reductase II [EC:1.3.1.9]	6.41473	7.41938	5.60557	-1.76234	1.49993	-1.15114	0.09	2.37881e-09	2.10062e-08	1.94429e-09	1.52711e-08
K02372	fabZ; 3-hydroxyacyl-[acyl-carrier-protein] dehydratase [EC:4.2.1.59]	7.50114	8.13444	6.94853	-1.16195	0.967056	-1.12901	0.106779	7.52506e-09	6.04474e-08	1.36141e-08	8.88747e-08
K02379	fdhD; FdhD protein	5.48269	6.03507	4.99091	-1.01047	0.687072	-1.48725	0.0419916	9.8925e-13	1.71529e-11	1.401e-12	3.36301e-11
K02386	flgA; flagella basal body P-ring formation protein FlgA	4.44937	5.20695	4.00867	-1.26803	1.17301	-1.05512	0.1264	2.6799e-08	1.91424e-07	8.04378e-08	4.46673e-07
K02387	flgB; flagellar basal-body rod protein FlgB	5.05407	5.66299	4.6328	-1.0579	0.809433	-1.24879	0.089782	2.71112e-10	2.87078e-09	1.3405e-09	1.06973e-08
K02388	flgC; flagellar basal-body rod protein FlgC	5.12904	5.69387	4.76966	-1.03229	0.789739	-1.23276	0.085	4.94782e-10	4.94792e-09	1.65536e-09	1.29015e-08
K02389	flgD; flagellar basal-body rod modification protein FlgD	4.98109	5.5592	4.61829	-1.01383	0.879661	-1.06077	0.1238	3.28488e-08	2.30226e-07	8.61162e-08	4.73084e-07
K02390	flgE; flagellar hook protein FlgE	5.00626	5.62317	4.69515	-0.975271	0.850834	-1.07734	0.129574	5.03829e-08	3.39189e-07	1.48887e-07	7.76702e-07
K02391	flgF; flagellar basal-body rod protein FlgF	4.72154	5.26312	4.27823	-1.16424	0.992573	-1.13309	0.10058	2.55242e-09	2.21314e-08	4.29424e-09	3.08576e-08
K02393	flgH; flagellar L-ring protein precursor FlgH	5.02365	5.64976	4.53477	-1.15797	0.914131	-1.21657	0.0968	9.3968e-10	8.87083e-09	3.36836e-09	2.48833e-08
K02394	flgI; flagellar P-ring protein precursor FlgI	4.88444	5.51375	4.45337	-1.1069	0.894828	-1.1957	0.0971806	1.62222e-09	1.45739e-08	4.88831e-09	3.47491e-08
K02395	flgJ; flagellar protein FlgJ	5.38472	5.86934	4.17819	-1.75958	0.967583	-1.80429	0.0308	7.51436e-13	1.31786e-11	2.17989e-13	7.69737e-12
K02396	flgK; flagellar hook-associated protein 1 FlgK	4.75067	5.53139	4.26782	-1.22524	0.895907	-1.3416	0.0816	9.41634e-11	1.08748e-09	9.0168e-10	7.45834e-09
K02397	flgL; flagellar hook-associated protein 3 FlgL	4.74888	5.38995	4.16268	-1.39429	0.93706	-1.47629	0.0312	8.45445e-13	1.4584e-11	2.64776e-13	8.29853e-12
K02398	flgM; negative regulator of flagellin synthesis FlgM	4.10472	5.15417	3.69854	-1.44877	1.16163	-1.20087	0.09998	1.60841e-09	1.45007e-08	7.44796e-09	5.09321e-08
K02399	flgN; flagella synthesis protein FlgN	2.67128	3.44562	1.59728	-1.78221	1.19492	-1.27075	0.1262	2.01233e-07	1.18155e-06	1.15043e-07	6.22556e-07
K02400	flhA; flagellar biosynthesis protein FlhA	5.1044	5.70879	4.73655	-1.05559	0.792471	-1.26112	0.0829834	2.97439e-10	3.11072e-09	1.11482e-09	8.99548e-09
K02401	flhB; flagellar biosynthetic protein FlhB	5.08783	5.69151	4.70279	-1.00667	0.818184	-1.18109	0.09998	1.76246e-09	1.57295e-08	6.58446e-09	4.55296e-08
K02402	flhC; flagellar transcriptional activator FlhC	3.20763	3.69104	2.51757	-1.22678	1.15167	-1.02246	0.133573	2.43104e-07	1.4015e-06	2.44745e-07	1.21869e-06
K02403	flhD; flagellar transcriptional activator FlhD	3.20767	3.69076	2.51787	-1.21435	1.14502	-1.01109	0.135373	2.5868e-07	1.46832e-06	2.50783e-07	1.24137e-06
K02404	flhF; flagellar biosynthesis protein FlhF	4.38983	5.13712	3.87533	-1.26164	1.13084	-1.07908	0.120576	1.77638e-08	1.31378e-07	3.92627e-08	2.32317e-07
K02405	fliA; RNA polymerase sigma factor for flagellar operon FliA	5.66399	6.10893	5.08313	-0.923845	0.689253	-1.31221	0.0755849	1.03482e-10	1.18947e-09	3.83801e-10	3.45442e-09
K02406	fliC; flagellin	5.69089	6.123	5.12182	-1.07641	0.793939	-1.30865	0.0703859	8.36421e-11	9.84992e-10	1.39146e-10	1.41013e-09
K02407	fliD; flagellar hook-associated protein 2	4.77416	5.39151	4.22681	-1.26146	0.826893	-1.49145	0.0437913	1.53744e-12	2.53812e-11	1.52035e-12	3.60175e-11
K02408	fliE; flagellar hook-basal body complex protein FliE	5.02923	5.67293	4.65768	-1.06155	0.786964	-1.313	0.0777844	1.91433e-10	2.07525e-09	1.05973e-09	8.53987e-09
K02409	fliF; flagellar M-ring protein FliF	5.04908	5.66347	4.64832	-1.06907	0.809044	-1.28722	0.0855829	2.63963e-10	2.78192e-09	1.29184e-09	1.02887e-08
K02410	fliG; flagellar motor switch protein FliG	4.98569	5.65057	4.60705	-1.12184	0.843272	-1.31656	0.0776	8.64174e-11	1.00882e-09	3.81968e-10	3.40347e-09
K02411	fliH; flagellar assembly protein FliH	4.75172	5.38645	4.35672	-1.01784	0.937661	-1.07559	0.124775	2.69609e-08	1.9217e-07	7.98299e-08	4.4298e-07
K02412	fliI; flagellum-specific ATP synthase [EC:3.6.3.14]	5.08471	5.70587	4.72616	-1.07086	0.806927	-1.28291	0.0793841	1.81489e-10	1.98131e-09	6.97469e-10	5.88096e-09
K02413	fliJ; flagellar FliJ protein	4.0764	5.0999	3.6264	-1.44673	1.18389	-1.17624	0.10158	2.50425e-09	2.17088e-08	9.26064e-09	6.22658e-08
K02414	fliK; flagellar hook-length control protein FliK	3.12296	3.77443	2.42517	-1.23086	0.868632	-1.31085	0.0823835	5.47774e-10	5.31642e-09	1.38095e-09	1.09988e-08
K02415	fliL; flagellar FliL protein	4.77211	5.57491	4.22845	-1.51146	1.16604	-1.24443	0.0807838	3.82659e-10	3.95515e-09	3.98743e-10	3.59259e-09
K02416	fliM; flagellar motor switch protein FliM	4.90576	5.67182	4.46109	-1.28832	0.844046	-1.49552	0.0392	8.12214e-13	1.42349e-11	2.05688e-12	4.46415e-11
K02417	fliNY, fliN; flagellar motor switch protein FliN/FliY	5.10235	5.49459	4.66653	-0.965695	0.84061	-1.13057	0.1022	3.89198e-09	3.25383e-08	1.01734e-08	6.75518e-08
K02418	fliOZ, fliO; flagellar protein FliO/FliZ	4.51145	5.21792	3.85208	-1.53013	0.991329	-1.50528	0.0342	1.04968e-12	1.78703e-11	7.56249e-13	1.97179e-11
K02419	fliP; flagellar biosynthetic protein FliP	5.08504	5.69454	4.72531	-1.05415	0.806513	-1.25543	0.0856	2.75656e-10	2.89898e-09	1.16644e-09	9.34715e-09
K02420	fliQ; flagellar biosynthetic protein FliQ	5.11937	5.71261	4.75629	-1.0413	0.806762	-1.24759	0.0869826	3.80576e-10	3.90102e-09	1.4503e-09	1.14575e-08
K02421	fliR; flagellar biosynthetic protein FliR	5.1112	5.70847	4.71755	-1.0757	0.819433	-1.26377	0.08	2.48714e-10	2.64195e-09	8.96998e-10	7.39583e-09
K02422	fliS; flagellar protein FliS	4.73738	5.41133	4.11059	-1.44544	0.807688	-1.73446	0.0159968	9.32743e-15	2.50503e-13	1.25035e-14	7.40919e-13
K02423	fliT; flagellar protein FliT	3.48213	3.88864	2.57044	-1.33596	0.993848	-1.25301	0.1054	4.6264e-09	3.77367e-08	1.05355e-08	7.01723e-08
K02427	rlmE, rrmJ, ftsJ; 23S rRNA (uridine2552-2'-O)-methyltransferase [EC:2.1.1.166]	5.10229	5.57123	4.61186	-1.11701	0.999187	-1.09848	0.0956	2.68679e-08	1.93399e-07	2.98131e-09	2.22417e-08
K02433	gatA, QRSL1; aspartyl-tRNA(Asn)/glutamyl-tRNA(Gln) amidotransferase subunit A [EC:6.3.5.6 6.3.5.7]	9.11118	9.53671	7.72423	-1.61357	0.929523	-1.4241	0.0903819	4.26347e-10	4.40047e-09	2.27777e-09	1.76053e-08
K02444	glpR; DeoR family transcriptional regulator, glycerol-3-phosphate regulon repressor	4.15835	4.38754	3.3035	-1.10044	0.919164	-1.07546	0.1258	1.61794e-07	9.76141e-07	1.50209e-07	7.76123e-07
K02483	K02483; two-component system, OmpR family, response regulator	7.66057	9.35522	6.66169	-2.69798	0.747688	-3.49506	0.00199981	1.00518e-25	1.20118e-22	5.79767e-17	1.59038e-14
K02484	K02484; two-component system, OmpR family, sensor kinase [EC:2.7.13.3]	6.21366	8.22468	5.18988	-3.04152	0.82541	-3.50674	0.019996	3.441e-22	5.58477e-20	1.03942e-14	6.80383e-13
K02494	lolB; outer membrane lipoprotein LolB	4.36807	5.22559	3.43702	-1.8235	1.17697	-1.55731	0.0408	8.49915e-13	1.46446e-11	1.06346e-12	2.70844e-11
K02496	hemX; uroporphyrin-III C-methyltransferase [EC:2.1.1.107]	4.33499	5.15343	3.32185	-1.85287	1.14848	-1.57911	0.0318	1.61882e-13	3.31319e-12	2.67452e-13	8.77026e-12
K02498	hemY; HemY protein	4.51612	5.23702	3.87826	-1.45259	1.12038	-1.27176	0.0698	1.3082e-10	1.47513e-09	1.78651e-10	1.75335e-09
K02517	lpxL, htrB; Kdo2-lipid IVA lauroyltransferase [EC:2.3.1.241]	8.43615	8.86222	7.50241	-1.19465	1.05324	-1.05807	0.1518	1.98542e-07	1.19619e-06	8.74539e-07	3.92254e-06
K02556	motA; chemotaxis protein MotA	5.38752	6.28243	4.99494	-1.20407	0.98223	-1.16999	0.1018	3.06963e-09	2.63323e-08	7.96413e-09	5.41105e-08
K02557	motB; chemotaxis protein MotB	7.32493	7.77067	6.65477	-1.40719	1.2332	-1.11141	0.0832	6.37035e-09	5.19099e-08	1.11579e-09	9.2001e-09
K02575	NRT, narK, nrtP, nasA; MFS transporter, NNP family, nitrate/nitrite transporter	6.45489	6.93079	5.90835	-0.941357	0.695242	-1.23295	0.101	4.40569e-09	3.67552e-08	6.19995e-09	4.37701e-08
K02609	paaA; ring-1,2-phenylacetyl-CoA epoxidase subunit PaaA [EC:1.14.13.149]	4.20042	4.83431	3.04057	-1.80346	1.05137	-1.58247	0.0578	3.3382e-12	5.14816e-11	2.27967e-11	3.48115e-10
K02610	paaB; ring-1,2-phenylacetyl-CoA epoxidase subunit PaaB	4.11239	4.82718	3.01505	-1.83527	1.05343	-1.62935	0.0531894	1.26517e-12	2.14406e-11	1.12546e-11	1.99867e-10
K02611	paaC; ring-1,2-phenylacetyl-CoA epoxidase subunit PaaC [EC:1.14.13.149]	4.18509	4.83342	3.02092	-1.82023	1.04217	-1.60835	0.0545891	2.81634e-12	4.41571e-11	2.05058e-11	3.22197e-10
K02612	paaD; ring-1,2-phenylacetyl-CoA epoxidase subunit PaaD	4.11595	4.82495	3.01392	-1.83286	1.05748	-1.64274	0.0523895	1.31968e-12	2.22693e-11	1.19602e-11	2.092e-10
K02614	paaI; acyl-CoA thioesterase [EC:3.1.2.-]	4.01158	4.67212	2.9897	-1.76077	1.02559	-1.6577	0.0343931	2.00666e-13	4.0217e-12	6.51437e-13	1.85738e-11
K02617	paaY; phenylacetic acid degradation protein	2.62077	3.35386	1.26319	-2.05393	1.8251	-1.05396	0.125	1.04655e-07	6.3683e-07	5.68493e-08	3.24645e-07
K02618	paaZ; oxepin-CoA hydrolase / 3-oxo-5,6-dehydrosuberyl-CoA semialdehyde dehydrogenase [EC:3.3.2.12 1.2.1.91]	3.42038	4.1898	2.23564	-1.95189	1.21341	-1.48847	0.0662	3.52564e-11	4.4064e-10	1.11381e-10	1.16778e-09
K02619	pabC; 4-amino-4-deoxychorismate lyase [EC:4.1.3.38]	4.55354	5.28155	4.08906	-1.15628	0.915166	-1.14232	0.131574	3.68389e-07	2.05536e-06	1.34713e-07	7.14189e-07
K02667	pilR, pehR; two-component system, NtrC family, response regulator PilR	5.7305	5.25465	6.5494	1.39756	1.26866	1.02183	0.110978	8.54549e-08	5.5863e-07	1.69175e-08	1.0872e-07
K02686	priB; primosomal replication protein N	4.11159	4.50901	2.78328	-1.71501	0.915081	-1.73239	0.0506	9.06861e-12	1.25579e-10	1.00114e-11	1.75135e-10
K02806	PTS-Ntr-EIIA, ptsN; PTS system, nitrogen regulatory IIA component [EC:2.7.1.-]	5.29524	5.63737	4.86773	-0.874018	0.768384	-1.08823	0.107578	1.27065e-08	9.65598e-08	1.70462e-08	1.07861e-07
K02821	PTS-Ula-EIIA, ulaC, sgaA; PTS system, ascorbate-specific IIA component [EC:2.7.1.194]	4.16522	4.52255	3.10471	-1.43322	0.770705	-1.67151	0.0818	8.89087e-11	1.00824e-09	6.26403e-10	5.41617e-09
K02823	pyrDII; dihydroorotate dehydrogenase electron transfer subunit	4.67433	6.16633	3.83975	-2.2943	1.06172	-1.99728	0.0537892	7.78759e-14	1.75678e-12	1.25364e-11	2.28107e-10
K02841	waaC, rfaC; heptosyltransferase I [EC:2.4.-.-]	4.81183	5.33629	4.30551	-1.14146	0.84242	-1.31139	0.0584	8.27714e-11	9.67968e-10	2.5061e-11	3.53735e-10
K02843	waaF, rfaF; heptosyltransferase II [EC:2.4.-.-]	6.33727	6.92788	5.6111	-1.52985	1.15556	-1.26233	0.0579884	2.5771e-10	2.77532e-09	2.73166e-11	4.00444e-10
K02844	waaG, rfaG; UDP-glucose:(heptosyl)LPS alpha-1,3-glucosyltransferase [EC:2.4.1.-]	2.46605	3.39236	1.08541	-2.19635	1.42222	-1.32919	0.103779	9.39375e-06	2.5255e-05	7.45184e-09	5.17833e-08
K02847	waaL, rfaL; O-antigen ligase [EC:2.4.1.-]	2.26062	3.01582	1.45839	-1.60576	1.10257	-1.40909	0.0628	8.07236e-11	8.63593e-10	5.8873e-11	6.6414e-10
K02851	wecA, tagO, rfe; UDP-GlcNAc:undecaprenyl-phosphate/decaprenyl-phosphate GlcNAc-1-phosphate transferase [EC:2.7.8.33 2.7.8.35]	6.31976	8.16779	5.44959	-2.89784	1.01852	-2.72457	0.0643871	2.1257e-12	3.47384e-11	5.53784e-11	6.46898e-10
K02860	rimM; 16S rRNA processing protein RimM	8.036	8.7504	6.91554	-1.83062	0.924227	-1.86457	0.0408	5.22874e-15	1.54013e-13	1.16802e-12	3.00764e-11
K02862	ctaG; putative membrane protein	4.65564	6.38936	2.92381	-3.44722	1.48273	-2.05843	0.0627874	2.7913e-07	1.5866e-06	5.47475e-11	6.43768e-10
K02907	RP-L30, MRPL30, rpmD; large subunit ribosomal protein L30	7.82973	8.66043	6.50656	-2.30486	0.975683	-2.24553	0.021	5.14547e-18	3.0949e-16	2.66581e-14	1.46222e-12
K02919	RP-L36, MRPL36, rpmJ; large subunit ribosomal protein L36	7.66034	8.14807	6.54017	-1.62484	0.811423	-1.76771	0.064	8.92149e-13	1.59346e-11	4.39275e-11	5.6829e-10
K03071	secB; preprotein translocase subunit SecB	5.07637	5.53685	4.50751	-1.18708	0.947518	-1.19096	0.0928	1.27878e-08	9.76823e-08	2.62967e-09	1.99632e-08
K03072	secD; preprotein translocase subunit SecD	7.58683	8.55934	6.44307	-2.20109	0.856508	-2.29999	0.0584	3.28854e-14	8.07782e-13	2.90861e-11	4.43341e-10
K03074	secF; preprotein translocase subunit SecF	7.58415	8.55869	6.43161	-2.21401	0.862851	-2.34352	0.060188	2.94282e-14	7.31055e-13	2.81415e-11	4.33745e-10
K03090	sigB; RNA polymerase sigma-B factor	7.46026	8.1171	6.14573	-1.88578	1.42452	-1.13553	0.0986	9.1699e-05	0.00024714	3.4323e-09	2.57156e-08
K03111	ssb; single-strand DNA-binding protein	9.08345	9.70721	8.17043	-1.38354	1.10458	-1.19523	0.107379	3.1661e-09	2.72766e-08	1.18497e-08	7.91312e-08
K03117	tatB; sec-independent protein translocase protein TatB	7.12169	8.33666	5.47199	-2.9246	0.82465	-3.12028	0.0348	2.73669e-19	2.04908e-17	4.93307e-13	1.49264e-11
K03119	tauD; taurine dioxygenase [EC:1.14.11.17]	5.95913	7.11537	4.31437	-2.70291	0.757824	-3.41602	0.00140002	7.24647e-27	2.13404e-23	1.69135e-17	8.60283e-15
K03168	topA; DNA topoisomerase I [EC:5.99.1.2]	8.06342	8.82516	7.05	-1.71312	0.946798	-1.66944	0.0529894	1.33856e-12	2.29711e-11	1.06563e-11	1.97785e-10
K03181	ubiC; chorismate--pyruvate lyase [EC:4.1.3.40]	3.28343	4.87847	2.63875	-2.03028	1.62925	-1.16152	0.1188	3.4179e-08	2.40706e-07	4.86005e-08	2.80379e-07
K03208	wcaI; colanic acid biosynthesis glycosyl transferase WcaI	5.2013	6.426	3.96055	-2.72213	1.44584	-1.74164	0.0617876	5.40525e-07	2.90452e-06	4.93344e-11	6.10085e-10
K03269	lpxH; UDP-2,3-diacylglucosamine hydrolase [EC:3.6.1.54]	6.18983	6.97492	5.58114	-1.51466	1.32311	-1.10267	0.0831834	1.68473e-08	1.26585e-07	5.22972e-10	4.61637e-09
K03274	gmhD, rfaD; ADP-L-glycero-D-manno-heptose 6-epimerase [EC:5.1.3.20]	5.11709	5.5563	4.53503	-0.9619	0.820817	-1.09962	0.105779	4.32259e-08	2.98492e-07	8.00441e-09	5.45516e-08
K03284	corA; magnesium transporter	8.04366	8.94473	7.19238	-1.66128	0.942479	-1.69928	0.0435913	4.13338e-14	9.90645e-13	1.62507e-12	3.95147e-11
K03297	emrE, qac, mmr, smr; small multidrug resistance pump	4.39206	5.7583	3.42193	-2.42853	1.05765	-2.19403	0.0157969	3.35674e-18	2.07506e-16	6.48712e-15	4.66908e-13
K03306	TC.PIT; inorganic phosphate transporter, PiT family	7.20905	8.04126	6.03391	-2.11259	0.990892	-2.08992	0.0274	1.48055e-16	6.03643e-15	7.77002e-14	3.38487e-12
K03313	nhaA; Na+:H+ antiporter, NhaA family	7.01423	8.03968	5.70446	-2.4057	1.37463	-1.7106	0.0364	2.66045e-14	6.67041e-13	7.3366e-13	2.04744e-11
K03320	amt, AMT, MEP; ammonium transporter, Amt family	8.92843	9.35051	7.85686	-1.3891	1.01737	-1.21137	0.123975	1.04577e-08	8.18286e-08	6.55814e-08	3.72938e-07
K03333	choD; cholesterol oxidase [EC:1.1.3.6]	3.78961	5.17388	2.22775	-3.20355	1.59437	-2.00174	0.0172	3.43788e-17	1.61929e-15	8.13556e-15	5.55057e-13
K03387	ahpF; alkyl hydroperoxide reductase subunit F [EC:1.6.4.-]	4.29041	4.69948	3.28682	-1.43751	0.739888	-1.75694	0.0614	7.81507e-12	1.05197e-10	4.6262e-11	5.83983e-10
K03392	ACMSD; aminocarboxymuconate-semialdehyde decarboxylase [EC:4.1.1.45]	3.39489	3.8953	2.26071	-1.76114	1.22408	-1.38467	0.065187	4.88831e-10	4.77697e-09	8.73216e-11	9.53382e-10
K03402	argR, ahrC; transcriptional regulator of arginine metabolism	6.01172	8.06256	4.63191	-3.55152	1.15029	-2.77291	0.0593881	6.22753e-16	2.25916e-14	2.11866e-11	3.54251e-10
K03405	chlI, bchI; magnesium chelatase subunit I [EC:6.6.1.1]	6.92234	7.99106	6.44232	-1.39169	1.22648	-1.05735	0.109778	2.26296e-08	1.66228e-07	1.67611e-08	1.08159e-07
K03406	mcp; methyl-accepting chemotaxis protein	7.32249	8.10265	6.93009	-1.3069	1.23117	-1.0138	0.137173	7.73374e-08	5.10879e-07	2.39055e-07	1.21379e-06
K03412	cheB; two-component system, chemotaxis family, protein-glutamate methylesterase/glutaminase [EC:3.1.1.61 3.5.1.44]	6.49599	6.70374	5.66216	-0.991662	0.795565	-1.10868	0.1154	5.50505e-08	3.73996e-07	3.29239e-08	1.96764e-07
K03413	cheY; two-component system, chemotaxis family, chemotaxis protein CheY	6.34251	6.82822	5.87845	-1.30176	1.19404	-1.05007	0.109778	3.42699e-08	2.43385e-07	1.32418e-08	8.68954e-08
K03417	prpB; methylisocitrate lyase [EC:4.1.3.30]	3.77499	4.89803	3.27235	-1.51663	1.02802	-1.30489	0.0894	1.55343e-08	1.16679e-07	2.28962e-09	1.75847e-08
K03426	E3.6.1.22, NUDT12, nudC; NAD+ diphosphatase [EC:3.6.1.22]	5.94285	8.0565	4.35929	-3.70608	0.937273	-3.6207	0.0583883	6.4452e-18	3.77517e-16	2.24509e-11	3.69421e-10
K03431	glmM; phosphoglucosamine mutase [EC:5.4.2.10]	7.66322	8.59899	6.52783	-2.12324	0.855298	-2.27064	0.0584	3.5652e-14	8.68679e-13	2.91802e-11	4.44876e-10
K03432	psmA, prcA; proteasome alpha subunit [EC:3.4.25.1]	5.77557	7.93595	4.43007	-3.59378	1.21433	-2.7555	0.0629874	9.14685e-10	8.76968e-09	5.53784e-11	6.46898e-10
K03433	psmB, prcB; proteasome beta subunit [EC:3.4.25.1]	5.77517	7.93725	4.42979	-3.58151	1.20982	-2.73627	0.065	9.01504e-10	8.6627e-09	5.53784e-11	6.46898e-10
K03437	spoU; RNA methyltransferase, TrmH family	7.93307	9.05802	7.01293	-1.85312	1.11189	-1.60835	0.0382	1.47532e-13	3.16146e-12	1.21072e-12	3.08804e-11
K03442	mscS; small conductance mechanosensitive channel	7.99433	8.93122	7.06852	-1.77483	1.21037	-1.37056	0.0688	4.20844e-11	5.29288e-10	1.04653e-10	1.11071e-09
K03465	thyX, thy1; thymidylate synthase (FAD) [EC:2.1.1.148]	7.1438	7.84963	5.61858	-2.13542	1.39097	-1.28154	0.0762	1.45921e-07	9.07419e-07	3.14656e-10	2.94797e-09
K03469	rnhA, RNASEH1; ribonuclease HI [EC:3.1.26.4]	7.97039	8.74452	6.96921	-1.71057	0.854835	-1.94732	0.0393921	3.30583e-15	1.02719e-13	1.01233e-12	2.69162e-11
K03478	chbG; chitin disaccharide deacetylase [EC:3.5.1.105]	5.04911	6.507	3.89659	-2.65991	1.20779	-2.05278	0.0625875	4.47913e-11	5.58721e-10	2.931e-11	4.45914e-10
K03496	parA, soj; chromosome partitioning protein	8.95136	9.18167	7.99275	-1.18438	0.809375	-1.31417	0.105	1.01444e-09	9.67248e-09	9.98188e-09	6.73083e-08
K03497	parB, spo0J; chromosome partitioning protein, ParB family	8.5337	8.85539	7.6142	-1.15184	0.990853	-1.07023	0.154969	1.65099e-07	1.01319e-06	9.43818e-07	4.18722e-06
K03499	trkA, ktrA; trk system potassium uptake protein	8.13737	9.29546	6.8131	-2.48223	0.938786	-2.42858	0.0668	7.34629e-13	1.34246e-11	5.53625e-11	6.46835e-10
K03500	rsmB, sun; 16S rRNA (cytosine967-C5)-methyltransferase [EC:2.1.1.176]	8.36961	8.80206	7.48233	-1.16944	1.03806	-1.03141	0.154169	2.6763e-07	1.56345e-06	8.92768e-07	3.99813e-06
K03501	gidB, rsmG; 16S rRNA (guanine527-N7)-methyltransferase [EC:2.1.1.170]	7.84867	8.6938	6.53768	-2.23674	1.0146	-2.12305	0.0233953	1.86515e-17	9.73042e-16	3.53386e-14	1.82378e-12
K03518	coxS; aerobic carbon-monoxide dehydrogenase small subunit [EC:1.2.5.3]	6.55344	8.56889	4.80829	-3.67449	0.865212	-3.8011	0.0418	8.95043e-20	7.26279e-18	1.47282e-12	3.63347e-11
K03519	coxM, cutM; aerobic carbon-monoxide dehydrogenase medium subunit [EC:1.2.5.3]	5.54696	7.39289	4.30007	-3.09063	0.864308	-3.25525	0.0332	8.32863e-20	6.7822e-18	5.19904e-13	1.54737e-11
K03520	coxL, cutL; aerobic carbon-monoxide dehydrogenase large subunit [EC:1.2.5.3]	6.12116	7.95843	4.71407	-3.24133	0.920191	-3.22849	0.0259948	1.78021e-20	1.6686e-18	1.21164e-13	4.83238e-12
K03521	fixA, etfB; electron transfer flavoprotein beta subunit	7.76408	8.62375	6.57068	-2.12055	1.03269	-1.97426	0.028	1.77324e-16	7.15168e-15	1.7449e-13	6.40687e-12
K03522	fixB, etfA; electron transfer flavoprotein alpha subunit	8.03472	8.85463	6.64312	-2.31202	1.04098	-2.13469	0.0257949	3.03054e-17	1.47629e-15	7.1966e-14	3.1881e-12
K03523	bioY; biotin transport system substrate-specific component	7.45527	8.42761	5.99863	-2.36707	1.23751	-1.7098	0.0665867	2.8821e-10	3.08478e-09	7.83388e-11	8.66597e-10
K03531	ftsZ; cell division protein FtsZ	8.0461	8.80979	6.93116	-1.7853	0.857583	-1.97783	0.0377925	1.53046e-15	5.12399e-14	1.04904e-12	2.76961e-11
K03546	sbcC, rad50; DNA repair protein SbcC/Rad50	5.74136	6.52057	4.6649	-1.82932	0.774428	-2.16154	0.0355929	7.74521e-17	3.33673e-15	5.7452e-13	1.6855e-11
K03554	rdgC; recombination associated protein RdgC	4.23707	5.09993	3.51903	-1.62615	1.1929	-1.3282	0.0576	3.62677e-11	4.54676e-10	4.31343e-11	5.4105e-10
K03557	fis; Fis family transcriptional regulator, factor for inversion stimulation protein	4.59599	5.29891	3.75455	-1.63081	1.04735	-1.53113	0.0363927	8.55571e-13	1.48163e-11	7.88779e-13	2.02648e-11
K03558	cvpA; membrane protein required for colicin V production	6.56644	7.06945	5.84214	-1.34079	1.16222	-1.10703	0.1088	7.83023e-09	6.26894e-08	1.24981e-08	8.2908e-08
K03565	recX; regulatory protein	7.45191	8.31823	6.00158	-2.40975	1.01121	-2.25595	0.0162	1.62353e-18	1.05968e-16	6.24942e-15	4.49821e-13
K03566	gcvA; LysR family transcriptional regulator, glycine cleavage system transcriptional activator	5.18114	5.56184	4.29268	-1.18898	0.890193	-1.24498	0.0978	1.35073e-09	1.24226e-08	5.87906e-09	4.13475e-08
K03568	tldD; TldD protein	7.22677	8.39239	6.25016	-2.17736	0.74981	-2.64545	0.0592	5.6384e-15	1.6476e-13	3.25374e-11	4.76737e-10
K03569	mreB; rod shape-determining protein MreB and related proteins	8.72926	9.34423	7.74704	-1.32428	1.15379	-1.02167	0.1518	2.88108e-07	1.67203e-06	5.58369e-07	2.63189e-06
K03571	mreD; rod shape-determining protein MreD	4.66159	5.40562	3.97723	-1.43092	0.986976	-1.38566	0.0644	2.31151e-11	2.99688e-10	5.33033e-11	6.43771e-10
K03584	recO; DNA repair protein RecO (recombination protein O)	8.06954	8.77305	6.98889	-1.77455	0.925002	-1.81384	0.0405919	2.18299e-14	5.59019e-13	1.86331e-12	4.4001e-11
K03586	ftsL; cell division protein FtsL	4.52311	5.25311	3.67158	-1.67437	1.1321	-1.46534	0.0368	2.84172e-12	4.40177e-11	9.46731e-13	2.44763e-11
K03589	ftsQ; cell division protein FtsQ	7.90829	8.55515	6.77764	-1.77365	0.902249	-1.86891	0.0413917	5.38194e-15	1.58e-13	1.21339e-12	3.09978e-11
K03592	pmbA; PmbA protein	7.05811	7.6305	5.93336	-1.66207	0.774183	-1.94122	0.0779844	1.31755e-12	2.25489e-11	3.20077e-10	2.99209e-09
K03593	mrp, NUBPL; ATP-binding protein involved in chromosome partitioning	8.77634	9.26048	7.81085	-1.32224	1.1096	-1.02389	0.146571	7.72759e-07	4.01129e-06	4.54184e-07	2.18017e-06
K03594	bfr; bacterioferritin [EC:1.16.3.1]	5.69888	6.41733	5.33764	-1.08496	0.81073	-1.2315	0.1038	3.12893e-09	2.67511e-08	9.35762e-09	6.32249e-08
K03595	era, ERAL1; GTPase	8.02304	8.74789	6.90492	-1.85055	0.940712	-1.8634	0.0384	5.08961e-15	1.50605e-13	1.14589e-12	2.96065e-11
K03598	rseB; sigma-E factor negative regulatory protein RseB	3.86902	5.02203	3.35189	-1.6193	1.412	-1.15805	0.10078	2.7722e-09	2.38878e-08	5.99294e-09	4.18855e-08
K03599	sspA, mglA; stringent starvation protein A	4.52589	5.25358	3.67655	-1.6842	1.12753	-1.4669	0.0379924	3.15687e-12	4.79947e-11	1.02195e-12	2.57305e-11
K03600	sspB; stringent starvation protein B	4.53349	5.25485	3.70169	-1.64265	1.13645	-1.45031	0.0385923	3.93454e-12	5.89455e-11	1.3016e-12	3.16673e-11
K03602	xseB; exodeoxyribonuclease VII small subunit [EC:3.1.11.6]	7.74003	8.56807	6.63253	-2.04577	0.805169	-2.26196	0.0633873	6.74184e-14	1.54982e-12	3.89141e-11	5.32332e-10
K03611	dsbB; disulfide bond formation protein DsbB	5.32103	7.0235	4.40102	-2.52754	0.603782	-3.97333	0.00499908	3.21531e-26	5.49584e-23	1.29928e-16	2.59199e-14
K03616	rnfB; electron transport complex protein RnfB	4.55562	5.26611	3.72016	-1.66916	1.11851	-1.48574	0.04	3.11097e-12	4.74822e-11	1.07482e-12	2.70791e-11
K03624	greA; transcription elongation factor GreA	7.83254	8.65446	6.59002	-2.15966	0.974021	-2.13326	0.0229954	2.30878e-17	1.16837e-15	3.56328e-14	1.82891e-12
K03625	nusB; N utilization substance protein B	8.08655	8.93891	7.05453	-1.74395	0.943631	-1.78605	0.045	3.18555e-14	7.85132e-13	2.52381e-12	5.68285e-11
K03634	lolA; outer membrane lipoprotein carrier protein	4.67531	5.34462	3.94082	-1.52285	1.02222	-1.44416	0.040192	4.29201e-12	6.40408e-11	9.21541e-13	2.39072e-11
K03635	MOCS2B, moaE; molybdopterin synthase catalytic subunit [EC:2.8.1.12]	7.63017	8.58665	6.62312	-1.895	0.782871	-2.23397	0.0616	1.21428e-13	2.65091e-12	2.82968e-11	4.35946e-10
K03636	moaD, cysO; sulfur-carrier protein	7.20778	7.73416	6.26403	-1.49044	0.761177	-1.77468	0.0741852	1.94245e-12	3.19361e-11	1.64296e-10	1.64903e-09
K03637	moaC, CNX3; cyclic pyranopterin monophosphate synthase [EC:4.6.1.17]	7.39003	8.42273	6.49547	-1.95809	0.706834	-2.56925	0.0622	8.66123e-14	1.94916e-12	4.26805e-11	5.61827e-10
K03643	lptE, rlpB; LPS-assembly lipoprotein	4.66088	5.36347	3.91924	-1.52308	1.04884	-1.41363	0.0484	7.09009e-12	1.01216e-10	6.4093e-12	1.22861e-10
K03646	tolA; colicin import membrane protein	6.00298	6.34508	5.05296	-1.52932	1.13393	-1.36117	0.0482	2.92411e-10	3.1005e-09	4.80602e-12	9.78726e-11
K03648	UNG, UDG; uracil-DNA glycosylase [EC:3.2.2.27]	7.69049	8.53814	6.0011	-2.58039	1.00384	-2.45063	0.00839837	9.09246e-20	7.3629e-18	7.9672e-16	9.47853e-14
K03656	rep; ATP-dependent DNA helicase Rep [EC:3.6.4.12]	4.40347	5.22387	3.66027	-1.6072	1.19323	-1.33833	0.0555889	3.06828e-11	3.88706e-10	1.8978e-11	2.91178e-10
K03657	uvrD, pcrA; DNA helicase II / ATP-dependent DNA helicase PcrA [EC:3.6.4.12]	9.62136	10.0862	8.46566	-1.45521	1.11065	-1.10789	0.1386	1.5577e-07	9.62935e-07	1.82442e-07	9.50855e-07
K03672	trxC; thioredoxin 2 [EC:1.8.1.8]	4.27245	5.24529	3.76018	-1.47683	1.19311	-1.21233	0.0775845	4.63247e-10	4.69177e-09	5.72325e-10	4.96101e-09
K03673	dsbA; thiol:disulfide interchange protein DsbA	4.55568	5.26106	3.78328	-1.63486	1.09212	-1.46612	0.0396	4.58113e-12	6.75556e-11	8.63792e-13	2.25641e-11
K03686	dnaJ; molecular chaperone DnaJ	9.20525	9.71297	8.09366	-1.5134	1.10177	-1.17343	0.108178	4.85534e-08	3.3541e-07	2.28162e-08	1.42895e-07
K03688	ubiB, aarF; ubiquinone biosynthesis protein	6.0914	7.33714	5.39048	-1.94112	0.64507	-2.83748	0.030194	3.1223e-20	2.77043e-18	1.77212e-13	6.57053e-12
K03690	ubiJ; ubiquinone biosynthesis protein UbiJ	4.52132	5.25342	3.67083	-1.6878	1.13255	-1.48684	0.0379924	3.0014e-12	4.57941e-11	9.50914e-13	2.43569e-11
K03694	clpA; ATP-dependent Clp protease ATP-binding subunit ClpA	4.75822	5.39172	4.07735	-1.35469	1.05438	-1.25097	0.0756	1.40718e-10	1.57575e-09	2.4708e-10	2.33626e-09
K03704	cspA; cold shock protein (beta-ribbon, CspA family)	8.50692	9.55823	7.29038	-2.40967	0.773977	-2.89221	0.0542	4.19435e-17	1.94596e-15	1.12018e-11	2.08076e-10
K03705	hrcA; heat-inducible transcriptional repressor	7.52894	8.44329	6.36131	-2.10581	0.842124	-2.21762	0.0614	1.96701e-14	5.07941e-13	2.27277e-11	3.71604e-10
K03709	troR; DtxR family transcriptional regulator, Mn-dependent transcriptional regulator	7.50456	8.36168	6.17509	-2.36982	1.09562	-2.0288	0.0415917	4.64714e-16	1.73006e-14	1.14407e-12	2.94899e-11
K03710	K03710; GntR family transcriptional regulator	6.98258	8.90607	5.85955	-3.08455	0.733256	-3.9152	0.0108	5.70414e-23	1.19231e-20	2.30114e-15	2.10605e-13
K03711	fur, zur, furB; Fur family transcriptional regulator, ferric uptake regulator	9.14422	9.63564	8.39841	-1.22913	1.03949	-1.03793	0.1388	4.12838e-07	2.30376e-06	2.58278e-07	1.30309e-06
K03727	helY; ATP-dependent RNA helicase HelY [EC:3.6.4.-]	5.993	8.04723	4.4871	-3.67656	1.27585	-2.63058	0.0639872	3.97986e-13	7.73519e-12	3.56922e-11	5.0624e-10
K03737	por, nifJ; pyruvate-ferredoxin/flavodoxin oxidoreductase [EC:1.2.7.1 1.2.7.-]	4.70093	5.60506	4.00176	-1.56931	1.22351	-1.15548	0.1192	4.03342e-08	2.81102e-07	3.14589e-08	1.91159e-07
K03743	pncC; nicotinamide-nucleotide amidase [EC:3.5.1.42]	5.95644	7.84522	4.88274	-3.03061	0.710337	-3.96387	0.00559895	5.88492e-25	3.45999e-22	1.64906e-16	3.06397e-14
K03745	slyX; SlyX protein	4.51312	5.23805	3.86344	-1.34897	1.12807	-1.17842	0.0886	1.11918e-09	1.04547e-08	1.35035e-09	1.082e-08
K03746	hns; DNA-binding protein H-NS	4.41192	4.75898	3.61947	-1.19869	1.04323	-1.07809	0.102979	1.37052e-07	8.44675e-07	1.04868e-08	7.01178e-08
K03747	smg; Smg protein	3.8348	4.958	3.34063	-1.58381	1.30735	-1.17122	0.103579	2.29818e-09	2.00264e-08	7.22338e-09	4.95285e-08
K03748	sanA; SanA protein	5.43073	4.18393	6.3986	2.5925	2.03276	1.1649	0.0891822	7.78992e-09	6.23191e-08	1.66286e-09	1.31902e-08
K03749	dedD; DedD protein	4.45634	5.19106	3.57487	-1.73294	1.13135	-1.49886	0.04	2.21205e-12	3.47639e-11	1.36952e-12	3.35043e-11
K03750	moeA; molybdopterin molybdotransferase [EC:2.10.1.1]	8.53549	8.90734	7.51927	-1.22844	0.980926	-1.02389	0.158368	1.88451e-06	8.6482e-06	2.92564e-06	1.10295e-05
K03752	mobA; molybdenum cofactor guanylyltransferase [EC:2.7.7.77]	6.84774	7.2161	6.36607	-0.879646	0.739232	-1.09232	0.1232	1.67077e-07	1.02061e-06	5.46343e-08	3.16781e-07
K03768	PPIB, ppiB; peptidyl-prolyl cis-trans isomerase B (cyclophilin B) [EC:5.2.1.8]	8.79462	9.05105	7.73201	-1.26931	0.98805	-1.00607	0.1498	1.39682e-05	4.62182e-05	6.17212e-07	2.87393e-06
K03769	ppiC; peptidyl-prolyl cis-trans isomerase C [EC:5.2.1.8]	5.36658	6.14544	4.91819	-1.24291	1.15308	-1.04202	0.120376	2.15017e-08	1.57946e-07	6.61292e-08	3.74666e-07
K03772	fkpA; FKBP-type peptidyl-prolyl cis-trans isomerase FkpA [EC:5.2.1.8]	5.34574	5.94468	4.72578	-1.12947	1.10835	-1.01167	0.106	8.62898e-08	5.60569e-07	1.66308e-08	1.06679e-07
K03774	slpA; FKBP-type peptidyl-prolyl cis-trans isomerase SlpA [EC:5.2.1.8]	4.05974	4.47013	3.28168	-1.30146	0.87478	-1.46551	0.0658	3.19014e-10	3.29071e-09	1.12684e-10	1.18175e-09
K03776	aer; aerotaxis receptor	4.63131	5.06348	3.55628	-1.58015	1.02955	-1.45229	0.0735853	4.43924e-10	4.51993e-09	3.41718e-10	3.15712e-09
K03781	katE, CAT, catB, srpA; catalase [EC:1.11.1.6]	5.76795	6.13426	5.29142	-0.957976	0.916009	-1.05471	0.098	4.96365e-08	3.37908e-07	3.76836e-09	2.76719e-08
K03786	aroQ, qutE; 3-dehydroquinate dehydratase II [EC:4.2.1.10]	8.03818	8.93943	6.96808	-1.87732	0.918409	-1.99996	0.0313937	3.09968e-16	1.19485e-14	2.14434e-13	7.64387e-12
K03787	surE; 5'-nucleotidase [EC:3.1.3.5]	7.55908	8.21522	6.85622	-1.3351	0.861321	-1.45118	0.0618	8.9512e-12	1.27232e-10	3.16089e-11	4.56056e-10
K03789	rimI; [ribosomal protein S18]-alanine N-acetyltransferase [EC:2.3.1.266]	7.86174	8.4649	6.87616	-1.68185	0.861835	-1.71144	0.0855829	1.3695e-10	1.56614e-09	9.08117e-10	7.67495e-09
K03790	rimJ; [ribosomal protein S5]-alanine N-acetyltransferase [EC:2.3.1.267]	7.54918	8.44711	6.18214	-2.36647	1.20265	-1.90022	0.0242	2.66532e-16	1.04024e-14	2.72783e-14	1.49102e-12
K03799	htpX; heat shock protein HtpX [EC:3.4.24.-]	6.7947	8.79469	5.81967	-3.05534	0.726389	-3.86607	0.0456	1.37905e-19	1.07914e-17	2.92104e-12	6.45677e-11
K03806	ampD; N-acetyl-anhydromuramoyl-L-alanine amidase [EC:3.5.1.28]	4.57085	5.25621	3.58736	-1.80789	1.1465	-1.57729	0.0269946	6.98677e-13	1.23896e-11	1.1691e-13	4.58527e-12
K03833	selB, EEFSEC; selenocysteine-specific elongation factor	4.50042	6.29795	3.43462	-3.00025	1.04057	-2.68727	0.0628	1.71384e-12	2.84551e-11	5.54704e-11	6.4778e-10
K03863	vanB; vanillate monooxygenase ferredoxin subunit	3.93698	4.29522	2.73409	-1.68087	0.878743	-1.72861	0.0787842	2.18158e-11	2.83166e-10	3.49448e-10	3.21493e-09
K03889	qcrC; ubiquinol-cytochrome c reductase cytochrome c subunit	5.90683	7.985	3.57958	-4.41598	1.30452	-2.93479	0.0629874	4.67257e-15	1.39255e-13	2.9824e-11	4.51355e-10
K03890	qcrA; ubiquinol-cytochrome c reductase iron-sulfur subunit	5.90651	7.98526	3.57156	-4.42842	1.32536	-2.92443	0.0613877	5.12593e-15	1.51023e-13	2.97832e-11	4.50991e-10
K03891	qcrB; ubiquinol-cytochrome c reductase cytochrome b subunit	5.90655	7.98473	3.57254	-4.42706	1.31129	-2.96937	0.0602	4.62702e-15	1.3813e-13	2.96507e-11	4.49631e-10
K03892	arsR; ArsR family transcriptional regulator, arsenate/arsenite/antimonite-responsive transcriptional repressor	8.89347	9.24094	7.74871	-1.47985	0.971731	-1.22841	0.111978	3.35515e-07	1.91479e-06	1.41845e-08	9.32346e-08
K03919	alkB; DNA oxidative demethylase [EC:1.14.11.33]	3.44495	4.00526	2.54118	-1.44446	0.777099	-1.76521	0.0377925	2.96731e-13	4.99151e-12	1.43403e-12	3.39908e-11
K03921	FAB2, SSI2, desA1; acyl-[acyl-carrier-protein] desaturase [EC:1.14.19.2 1.14.19.11 1.14.19.26]	7.38077	8.2751	5.2238	-3.15752	1.52795	-2.02519	0.0237953	2.15356e-16	8.54222e-15	4.35932e-14	2.14884e-12
K03925	mraZ; MraZ protein	7.7946	8.58714	6.50981	-2.17398	1.00526	-2.08438	0.0247951	6.60533e-17	2.90142e-15	6.5829e-14	2.92764e-12
K03928	yvaK; carboxylesterase [EC:3.1.1.1]	5.85436	7.98827	3.61887	-4.37719	1.08455	-3.46092	0.0608	1.108e-17	6.09528e-16	2.95921e-11	4.44415e-10
K03932	lpqC; polyhydroxybutyrate depolymerase	3.62585	4.15252	2.88116	-1.38888	0.872965	-1.4384	0.0795841	0.000157779	0.000400354	5.13828e-10	4.46486e-09
K03941	NDUFS8; NADH dehydrogenase (ubiquinone) Fe-S protein 8 [EC:1.6.5.3 1.6.99.3]	-0.879182	3.13452	-3.03301	-5.39907	4.76083	-1.00876	0.140372	2.96503e-05	7.22708e-05	3.43007e-07	1.61176e-06
K03976	ybaK, ebsC; Cys-tRNA(Pro)/Cys-tRNA(Cys) deacylase [EC:3.1.1.-]	5.63549	7.70058	3.9551	-3.79043	0.983217	-3.40657	0.0486	7.51043e-19	5.16603e-17	5.52096e-12	1.11716e-10
K03978	engB; GTP-binding protein	7.59567	8.35789	6.09315	-2.27706	1.03081	-2.09706	0.0196	9.50081e-17	4.02829e-15	1.50631e-14	9.1782e-13
K03981	dsbC; thiol:disulfide interchange protein DsbC [EC:5.3.4.1]	4.5322	5.35064	3.75507	-1.67779	1.17699	-1.38544	0.0481904	2.65932e-11	3.38395e-10	3.78702e-12	7.92599e-11
K04034	bchE; anaerobic magnesium-protoporphyrin IX monomethyl ester cyclase [EC:1.21.98.3]	-0.499142	0.448287	-1.51775	-2.06637	1.48421	-1.22186	0.095	7.45994e-05	0.000161932	1.3773e-08	7.74367e-08
K04036	bchJ; divinyl protochlorophyllide a 8-vinyl-reductase [EC:1.-.-.-]	-0.774907	0.405571	-1.79083	-2.4011	1.61207	-1.29943	0.0717856	1.18244e-05	3.11879e-05	4.49167e-10	3.75062e-09
K04042	glmU; bifunctional UDP-N-acetylglucosamine pyrophosphorylase / Glucosamine-1-phosphate N-acetyltransferase [EC:2.7.7.23 2.3.1.157]	7.69704	8.60302	6.55771	-2.07053	0.847535	-2.2397	0.0604	9.20858e-14	2.0606e-12	3.72602e-11	5.18898e-10
K04047	dps; starvation-inducible DNA-binding protein	7.85665	8.86131	7.02033	-1.68813	1.17866	-1.31527	0.074985	7.16595e-11	8.65703e-10	1.30717e-10	1.3508e-09
K04061	flhB2; flagellar biosynthesis protein	3.65486	4.92823	2.87897	-2.01261	1.33	-1.38678	0.0908	7.06314e-10	6.88475e-09	1.55111e-09	1.23937e-08
K04062	osmB; osmotically inducible lipoprotein OsmB	3.43549	3.82359	2.34273	-1.6042	1.09598	-1.3269	0.0994	7.12529e-10	6.8373e-09	6.94226e-09	4.8146e-08
K04074	divIVA; cell division initiation protein	5.63697	7.70856	3.9444	-3.79952	1.06077	-3.30413	0.0648	1.09946e-15	3.77998e-14	5.36466e-11	6.37415e-10
K04078	groES, HSPE1; chaperonin GroES	8.99853	9.38696	7.96685	-1.45429	1.08188	-1.17282	0.116377	7.04855e-08	4.70182e-07	3.71098e-08	2.2269e-07
K04085	tusA, sirA; tRNA 2-thiouridine synthesizing protein A [EC:2.8.1.-]	3.93565	5.10763	3.51682	-1.56463	1.43483	-1.01289	0.1554	1.92295e-07	1.15399e-06	9.02351e-07	3.93679e-06
K04090	E1.2.7.8; indolepyruvate ferredoxin oxidoreductase [EC:1.2.7.8]	4.4698	4.86982	3.6416	-1.23815	0.704392	-1.6838	0.05019	4.13901e-12	6.03347e-11	9.97209e-12	1.76927e-10
K04477	ycdX; putative hydrolase	5.56671	7.69322	3.23944	-4.37361	1.12368	-3.45245	0.0576	4.66868e-18	2.81956e-16	1.83662e-11	3.13146e-10
K04485	radA, sms; DNA repair protein RadA/Sms	8.02933	8.74264	6.90968	-1.83581	0.930766	-1.86567	0.040192	4.97779e-15	1.47742e-13	1.19149e-12	3.05192e-11
K04488	iscU, nifU; nitrogen fixation protein NifU and related proteins	7.39111	8.54409	6.10254	-2.5408	0.920228	-2.59389	0.0441912	4.05655e-17	1.89114e-15	3.14124e-12	6.88842e-11
K04517	tyrA2; prephenate dehydrogenase [EC:1.3.1.12]	8.35004	8.71602	7.17236	-1.36237	1.11951	-1.07732	0.15177	1.10616e-07	7.06892e-07	9.80441e-07	4.33706e-06
K04518	pheA2; prephenate dehydratase [EC:4.2.1.51]	7.88139	8.74376	6.48379	-2.17559	1.12024	-1.81246	0.0466	1.56978e-13	3.34325e-12	4.77246e-12	9.86787e-11
K04653	hypC; hydrogenase expression/formation protein HypC	4.39367	5.48943	4.09585	-1.35085	1.10826	-1.00807	0.180164	1.3039e-06	6.20778e-06	6.40525e-06	2.08771e-05
K04654	hypD; hydrogenase expression/formation protein HypD	4.17154	5.39906	3.72057	-1.64722	1.23478	-1.08231	0.166367	9.03141e-07	4.53526e-06	2.71595e-06	1.02735e-05
K04655	hypE; hydrogenase expression/formation protein HypE	4.23235	5.41422	3.85929	-1.47239	1.15493	-1.00122	0.182	3.13066e-06	1.30628e-05	9.6081e-06	2.95654e-05
K04656	hypF; hydrogenase maturation protein HypF	4.17768	5.41213	3.74743	-1.62039	1.19027	-1.06644	0.169566	7.23274e-07	3.73594e-06	3.99061e-06	1.40661e-05
K04749	rsbV; anti-sigma B factor antagonist	6.14629	8.1326	5.41872	-2.65826	0.886389	-2.88311	0.065187	6.53967e-11	7.95247e-10	5.53784e-11	6.46898e-10
K04751	glnB; nitrogen regulatory protein P-II 1	8.71674	9.10381	7.47443	-1.59072	1.11991	-1.16163	0.117377	3.12028e-07	1.79547e-06	2.66621e-08	1.65406e-07
K04752	glnK; nitrogen regulatory protein P-II 2	7.25658	7.72755	6.21107	-1.42745	0.944476	-1.27681	0.107778	2.02227e-08	1.49846e-07	8.61214e-09	5.92293e-08
K04754	mlaA, vacJ; phospholipid-binding lipoprotein MlaA	5.03737	5.49341	4.41816	-1.2058	0.969157	-1.19091	0.0908	1.23604e-08	9.47539e-08	1.88887e-09	1.48403e-08
K04757	rsbW; serine/threonine-protein kinase RsbW [EC:2.7.11.1]	7.20289	8.19833	6.18352	-2.10503	0.909026	-2.02302	0.0659868	3.35887e-07	1.91653e-06	6.97027e-11	7.81651e-10
K04758	feoA; ferrous iron transport protein A	6.3762	7.23257	5.96285	-1.27361	1.10351	-1.10669	0.1094	6.37009e-09	5.18056e-08	1.91485e-08	1.21354e-07
K04760	greB; transcription elongation factor GreB	4.51984	5.24599	3.75497	-1.57611	1.10885	-1.38076	0.0469906	1.22977e-11	1.67088e-10	6.34627e-12	1.19737e-10
K04761	oxyR; LysR family transcriptional regulator, hydrogen peroxide-inducible genes activator	6.4735	7.13351	5.85703	-1.34624	1.08687	-1.18668	0.0708	1.34411e-09	1.24909e-08	2.7296e-10	2.57612e-09
K04762	hslR; ribosome-associated heat shock protein Hsp15	6.15243	6.87038	5.75934	-1.20733	1.0827	-1.0952	0.10158	1.07416e-08	8.35777e-08	9.25548e-09	6.191e-08
K04772	degQ, hhoA; serine protease DegQ [EC:3.4.21.-]	3.05142	3.70023	2.37649	-1.31289	1.0242	-1.13928	0.1094	1.1695e-06	5.58695e-06	2.44095e-08	1.50811e-07
K05337	fer; ferredoxin	8.82213	9.53423	7.55435	-1.71867	1.25272	-1.14553	0.1094	1.80608e-06	8.35347e-06	1.49422e-08	9.75546e-08
K05501	slmA, ttk; TetR/AcrR family transcriptional regulator	4.08026	4.51655	2.78494	-1.72645	0.869682	-1.85554	0.0488	2.046e-12	3.21916e-11	4.64081e-12	9.336e-11
K05522	nei; endonuclease VIII [EC:3.2.2.- 4.2.99.18]	6.10181	7.71785	4.03165	-3.58684	1.22893	-2.64845	0.0587882	5.44244e-14	1.2731e-12	3.44225e-11	4.97284e-10
K05524	fdxA; ferredoxin	5.32623	5.77974	4.94725	-0.9952	0.905349	-1.02033	0.111578	1.07681e-07	6.8211e-07	2.70883e-08	1.64876e-07
K05527	bolA; BolA family transcriptional regulator, general stress-responsive regulator	5.07589	5.53251	4.53779	-1.16438	0.955836	-1.13749	0.095181	1.67557e-08	1.25352e-07	2.81997e-09	2.13021e-08
K05539	dusA; tRNA-dihydrouridine synthase A [EC:1.-.-.-]	6.0944	6.59815	5.38576	-1.14416	0.8801	-1.16536	0.1178	2.94213e-08	2.10327e-07	4.7658e-08	2.7797e-07
K05541	dusC; tRNA-dihydrouridine synthase C [EC:1.-.-.-]	5.10016	4.4439	6.43381	2.17168	1.41341	1.48664	0.0396	2.06163e-11	2.7324e-10	1.47742e-12	3.62267e-11
K05559	phaA; multicomponent K+:H+ antiporter subunit A	3.01332	3.52483	2.34323	-1.18179	1.01718	-1.09849	0.1048	9.12446e-09	7.00811e-08	9.48272e-09	6.22977e-08
K05560	phaC; multicomponent K+:H+ antiporter subunit C	3.01189	3.52109	2.34175	-1.17697	1.03175	-1.0931	0.1034	1.05967e-08	7.95931e-08	1.01664e-08	6.618e-08
K05561	phaD; multicomponent K+:H+ antiporter subunit D	3.01149	3.52321	2.33711	-1.20301	1.03532	-1.12616	0.1032	9.86983e-09	7.47749e-08	9.20279e-09	6.03243e-08
K05562	phaE; multicomponent K+:H+ antiporter subunit E	3.0144	3.52207	2.3422	-1.17957	1.0233	-1.09845	0.10058	1.04711e-08	7.9047e-08	9.63403e-09	6.32556e-08
K05563	phaF; multicomponent K+:H+ antiporter subunit F	3.02016	3.5219	2.34698	-1.17212	1.03456	-1.08447	0.102779	1.05204e-08	7.92346e-08	1.05521e-08	6.82486e-08
K05564	phaG; multicomponent K+:H+ antiporter subunit G	3.00048	3.51946	2.34022	-1.17443	1.02171	-1.10777	0.10158	8.06476e-09	6.24748e-08	7.60556e-09	5.0979e-08
K05565	mnhA, mrpA; multicomponent Na+:H+ antiporter subunit A	1.85216	1.19849	2.89601	1.83985	1.36292	1.29049	0.0738	1.30686e-09	1.17341e-08	2.96238e-10	2.68862e-09
K05589	ftsB; cell division protein FtsB	4.58356	5.26141	3.82525	-1.5688	1.06716	-1.43678	0.0428	4.22877e-12	6.33614e-11	2.14118e-12	4.71896e-11
K05591	dbpA; ATP-independent RNA helicase DbpA [EC:3.6.4.13]	4.2088	5.13186	3.3483	-1.78	1.15741	-1.5131	0.0464	1.2587e-12	2.0947e-11	3.53241e-12	7.30503e-11
K05595	marC; multiple antibiotic resistance protein	7.22429	8.22653	6.515	-1.83132	1.28969	-1.39102	0.0605879	1.644e-11	2.22508e-10	4.526e-11	5.78968e-10
K05602	hisN; histidinol-phosphatase [EC:3.1.3.15]	5.90884	7.98593	3.59412	-4.38559	1.24988	-3.12273	0.0595881	5.15223e-15	1.51683e-13	3.64777e-11	5.13339e-10
K05605	HIBCH; 3-hydroxyisobutyryl-CoA hydrolase [EC:3.1.2.4]	-1.58333	-2.91596	0.193191	3.5224	3.16288	1.07766	0.0814	6.18639e-08	3.48494e-07	2.5968e-09	1.77678e-08
K05710	hcaC; 3-phenylpropionate/trans-cinnamate dioxygenase ferredoxin component	6.18833	8.21566	4.88121	-3.32202	1.05042	-2.95824	0.0638	4.37498e-12	6.64268e-11	5.53784e-11	6.46898e-10
K05777	ABC.VB1X.S; putative thiamine transport system substrate-binding protein	1.73002	2.60074	0.650781	-1.88142	1.71462	-1.06125	0.0991802	1.62377e-07	8.9725e-07	8.62939e-09	5.71199e-08
K05778	ABC.VB1X.P; putative thiamine transport system permease protein	1.73361	2.59937	0.65597	-1.86412	1.70003	-1.04247	0.0985803	1.50344e-07	8.5951e-07	7.67854e-09	5.17376e-08
K05779	ABC.VB1X.A; putative thiamine transport system ATP-binding protein	1.73037	2.60307	0.64048	-1.88133	1.70185	-1.04396	0.0986	1.40499e-07	8.11681e-07	8.16606e-09	5.4524e-08
K05780	phnL; alpha-D-ribose 1-methylphosphonate 5-triphosphate synthase subunit PhnL [EC:2.7.8.37]	2.51439	3.15152	1.87158	-1.20338	1.06868	-1.04268	0.1216	1.36108e-07	7.93376e-07	9.04754e-08	4.84675e-07
K05781	phnK; putative phosphonate transport system ATP-binding protein	2.51898	3.15804	1.8833	-1.20927	1.05578	-1.04236	0.1266	1.3451e-07	7.98927e-07	1.03637e-07	5.5115e-07
K05785	rfaH; transcriptional antiterminator RfaH	4.96584	4.00311	6.41543	2.69556	1.95104	1.28896	0.071	3.45486e-09	2.94854e-08	1.78638e-10	1.78328e-09
K05794	terC; tellurite resistance protein TerC	7.72601	8.5693	5.85395	-2.75601	1.27974	-2.10809	0.0274	4.6341e-17	2.12143e-15	8.94279e-14	3.76121e-12
K05803	nlpI; lipoprotein NlpI	-2.97713	-5.28734	0.342496	5.53388	3.91641	1.36489	0.0576	7.35808e-09	4.50689e-08	5.43786e-10	3.71341e-09
K05807	bamD; outer membrane protein assembly factor BamD	6.67144	7.10342	5.95455	-1.26526	1.13667	-1.0757	0.115577	1.65377e-08	1.24479e-07	1.99988e-08	1.26665e-07
K05813	ugpB; sn-glycerol 3-phosphate transport system substrate-binding protein	4.79773	5.27034	3.89237	-1.42632	0.56919	-2.39773	0.00160026	3.73678e-19	2.56832e-17	2.67109e-17	1.01394e-14
K05814	ugpA; sn-glycerol 3-phosphate transport system permease protein	4.79678	5.29251	3.87862	-1.47576	0.591193	-2.4256	0.000800519	4.45106e-19	2.99711e-17	2.41842e-17	9.74671e-15
K05815	ugpE; sn-glycerol 3-phosphate transport system permease protein	4.79003	5.26581	3.86497	-1.45068	0.595532	-2.34916	0.00160026	7.50625e-19	4.9277e-17	3.17299e-17	1.09608e-14
K05816	ugpC; sn-glycerol 3-phosphate transport system ATP-binding protein [EC:3.6.3.20]	4.41897	4.88282	3.30822	-1.50983	0.778466	-1.79094	0.0338	3.64494e-14	8.44941e-13	4.18822e-13	1.24247e-11
K05825	LYSN; 2-aminoadipate transaminase [EC:2.6.1.-]	4.09898	4.48575	3.27451	-1.20712	0.784196	-1.45785	0.0863827	3.95067e-10	3.9072e-09	1.22047e-09	9.86121e-09
K05834	rhtB; homoserine/homoserine lactone efflux protein	3.40806	4.42664	2.11795	-2.11471	1.10688	-1.86497	0.0203959	1.55004e-15	4.8713e-14	1.65551e-14	9.53579e-13
K05838	ybbN; putative thioredoxin	6.21321	8.24479	5.15898	-3.08714	0.802384	-3.64315	0.0282	1.03417e-21	1.34689e-19	6.3889e-14	2.89494e-12
K05973	phaZ; poly(3-hydroxybutyrate) depolymerase [EC:3.1.1.75]	4.39459	4.77806	3.39511	-1.41571	0.867534	-1.53174	0.0762	8.32409e-11	9.61819e-10	3.40313e-10	3.14051e-09
K05984	cho; excinuclease Cho [EC:3.1.25.-]	-0.192923	2.40103	-2.26567	-4.28911	2.62395	-1.58508	0.0403919	4.29643e-08	1.78512e-07	2.9398e-12	5.95388e-11
K06001	trpB; tryptophan synthase beta chain [EC:4.2.1.20]	3.16186	3.68908	2.6874	-1.02562	0.908861	-1.07052	0.116377	8.54414e-08	5.35438e-07	5.67531e-08	3.17442e-07
K06013	STE24; STE24 endopeptidase [EC:3.4.24.84]	4.86317	5.58851	4.0255	-1.52521	0.857095	-1.76074	0.0185963	6.99258e-15	1.92838e-13	1.31675e-14	7.9171e-13
K06015	E3.5.1.81; N-acyl-D-amino-acid deacylase [EC:3.5.1.81]	3.72395	4.15893	3.16851	-1.05165	0.728549	-1.43414	0.0333933	2.08264e-11	2.5065e-10	1.11172e-12	2.58438e-11
K06016	pydC; beta-ureidopropionase / N-carbamoyl-L-amino-acid hydrolase [EC:3.5.1.6 3.5.1.87]	6.2667	7.92841	4.92853	-2.99998	0.761687	-3.70991	0.00220019	1.02143e-26	2.56512e-23	5.15998e-17	1.48207e-14
K06020	E3.6.3.25; sulfate-transporting ATPase [EC:3.6.3.25]	3.89432	4.25041	2.78406	-1.51295	0.958643	-1.4634	0.0854	3.51844e-10	3.5849e-09	1.90162e-09	1.48334e-08
K06049	bchO; magnesium chelatase accessory protein	1.3863	3.0927	0.377128	-2.64484	1.47243	-1.6801	0.0652	2.8648e-12	4.16665e-11	7.68779e-11	8.57779e-10
K06077	slyB; outer membrane lipoprotein SlyB	2.6843	3.44161	1.92768	-1.44667	0.995779	-1.22974	0.121776	6.0187e-07	3.12038e-06	6.3843e-08	3.64203e-07
K06134	COQ7; ubiquinone biosynthesis monooxygenase Coq7 [EC:1.14.13.-]	5.04187	5.54796	4.2381	-1.36508	0.979441	-1.27542	0.0914	2.5956e-09	2.26131e-08	1.19725e-09	9.82547e-09
K06137	pqqC; pyrroloquinoline-quinone synthase [EC:1.3.3.11]	3.28034	4.68262	2.25725	-2.30399	1.20988	-1.74406	0.0782	1.86413e-09	1.6679e-08	2.31316e-10	2.23953e-09
K06145	gntR; LacI family transcriptional regulator, gluconate utilization system Gnt-I transcriptional repressor	4.17792	4.47032	3.30336	-1.2469	1.0536	-1.13957	0.1056	3.01607e-08	2.1263e-07	1.67056e-08	1.06569e-07
K06147	ABCB-BAC; ATP-binding cassette, subfamily B, bacterial	10.3784	10.9546	9.27739	-1.61318	0.958938	-1.4721	0.0886	3.50053e-10	3.68139e-09	7.6147e-10	6.5501e-09
K06148	ABCC-BAC; ATP-binding cassette, subfamily C, bacterial	5.67556	7.91577	4.43422	-3.37579	0.773678	-3.9976	0.0618	2.87028e-18	1.81507e-16	2.66187e-11	4.12826e-10
K06162	phnM; alpha-D-ribose 1-methylphosphonate 5-triphosphate diphosphatase [EC:3.6.1.63]	2.65881	3.255	2.04832	-1.13598	1.05166	-1.02394	0.1304	1.9802e-07	1.12341e-06	1.5225e-07	7.7513e-07
K06163	phnJ; alpha-D-ribose 1-methylphosphonate 5-phosphate C-P lyase [EC:4.7.1.1]	2.51799	3.1548	1.88386	-1.18617	1.06061	-1.04654	0.1248	1.34885e-07	8.03379e-07	1.04124e-07	5.52068e-07
K06164	phnI; alpha-D-ribose 1-methylphosphonate 5-triphosphate synthase subunit PhnI [EC:2.7.8.37]	2.51364	3.14955	1.87509	-1.21332	1.06065	-1.05681	0.125175	1.40134e-07	8.16983e-07	1.03774e-07	5.49421e-07
K06165	phnH; alpha-D-ribose 1-methylphosphonate 5-triphosphate synthase subunit PhnH [EC:2.7.8.37]	2.51202	3.14881	1.88116	-1.20432	1.0642	-1.02845	0.121776	1.35488e-07	7.99902e-07	1.01381e-07	5.38879e-07
K06166	phnG; alpha-D-ribose 1-methylphosphonate 5-triphosphate synthase subunit PhnG [EC:2.7.8.37]	2.51596	3.15054	1.88042	-1.18923	1.07227	-1.03263	0.123	1.43946e-07	8.42673e-07	1.07814e-07	5.69333e-07
K06179	rluC; 23S rRNA pseudouridine955/2504/2580 synthase [EC:5.4.99.24]	5.50309	5.92056	4.95957	-1.06318	0.917702	-1.07772	0.111178	3.99872e-08	2.78475e-07	1.96648e-08	1.24335e-07
K06186	bamE, smpA; outer membrane protein assembly factor BamE	4.51986	5.25215	3.67595	-1.66142	1.11982	-1.47735	0.0405919	2.88312e-12	4.46794e-11	1.11657e-12	2.77294e-11
K06189	corC; magnesium and cobalt transporter	4.55487	5.30907	3.78807	-1.59791	1.13728	-1.40119	0.0456	1.41166e-11	1.89912e-10	4.02688e-12	8.1004e-11
K06190	ispZ; intracellular septation protein	5.09712	5.58158	4.46171	-1.26152	0.926132	-1.25037	0.0883823	3.48734e-09	2.95769e-08	1.23032e-09	1.00434e-08
K06194	nlpD; lipoprotein NlpD	4.47845	5.25637	3.67636	-1.68669	1.09955	-1.51051	0.0303939	1.21898e-12	2.04239e-11	3.32879e-13	1.02853e-11
K06196	ccdA; cytochrome c-type biogenesis protein	7.13806	8.41772	5.94592	-2.55389	1.07592	-2.11556	0.064	4.34927e-10	4.48403e-09	5.65062e-11	6.66617e-10
K06199	crcB, FEX; fluoride exporter	7.97111	8.80067	7.05313	-1.8018	0.794306	-2.05705	0.0745851	4.08572e-13	7.92429e-12	1.90346e-10	1.89257e-09
K06202	cyaY; CyaY protein	4.04523	4.40163	2.99209	-1.43412	0.859303	-1.57661	0.0807838	8.82635e-11	1.02022e-09	6.17668e-10	5.29096e-09
K06203	cysZ; CysZ protein	3.7857	5.36288	3.19165	-2.064	1.40584	-1.3859	0.0827834	3.21288e-08	2.27618e-07	9.20898e-10	7.67984e-09
K06215	pdxS, pdx1; pyridoxal 5'-phosphate synthase pdxS subunit [EC:4.3.3.6]	6.06425	8.09648	4.70762	-3.51997	1.14724	-2.87153	0.0588	9.51663e-15	2.62308e-13	2.96201e-11	4.49324e-10
K06378	spoIIAA; stage II sporulation protein AA (anti-sigma F factor antagonist)	1.75956	2.20022	0.646382	-1.58719	1.27297	-1.14053	0.107	5.62175e-07	2.26819e-06	1.66773e-08	1.04562e-07
K06446	DCAA; acyl-CoA dehydrogenase [EC:1.3.99.-]	2.43231	3.23193	0.912455	-2.19808	1.9883	-1.00793	0.1214	3.29284e-05	7.50348e-05	4.32849e-08	2.5384e-07
K06603	flaG; flagellar protein FlaG	3.55665	4.89189	2.745	-2.13984	1.34087	-1.45671	0.0811838	3.12122e-10	3.27955e-09	6.71032e-10	5.81006e-09
K06864	larE; pyridinium-3,5-biscarboxylic acid mononucleotide sulfurtransferase	6.49057	7.05988	5.46099	-1.52874	1.09887	-1.14612	0.1014	1.31343e-05	4.3895e-05	7.64197e-09	5.31363e-08
K06879	queF; 7-cyano-7-deazaguanine reductase [EC:1.7.1.13]	4.16768	4.51876	3.03391	-1.49518	0.826458	-1.70923	0.054789	7.43013e-12	1.03936e-10	2.54372e-11	3.58126e-10
K06891	clpS; ATP-dependent Clp protease adaptor protein ClpS	8.24458	8.8812	7.25809	-1.67925	0.94519	-1.60444	0.0622	3.63826e-12	5.62879e-11	5.51714e-11	6.60014e-10
K06893	K06893; uncharacterized protein	4.37466	5.33938	3.84574	-1.58343	1.49183	-1.02642	0.1334	1.08794e-07	6.91703e-07	1.04766e-07	5.70639e-07
K06898	larB; pyridinium-3,5-biscarboxylic acid mononucleotide synthase [EC:2.5.1.143]	6.66954	7.16383	5.62095	-1.49184	1.10839	-1.09692	0.104579	6.844e-05	0.000189521	8.77399e-09	6.01404e-08
K06901	pbuG; putative MFS transporter, AGZA family, xanthine/uracil permease	7.1868	7.94194	6.03208	-1.90497	0.99976	-1.69692	0.0767846	5.49232e-10	5.54276e-09	3.12548e-10	2.93192e-09
K06902	UMF1; MFS transporter, UMF1 family	6.13042	6.94604	5.57403	-1.38052	1.18214	-1.1339	0.089	2.80014e-09	2.43479e-08	1.63174e-09	1.29957e-08
K06910	K06910; uncharacterized protein	5.99999	8.11718	4.79792	-3.29926	0.647878	-4.689	0.0177965	3.01362e-23	7.00998e-21	6.28854e-15	4.56584e-13
K06911	K06911; uncharacterized protein	9.15393	9.81712	8.25944	-1.44086	1.01115	-1.33583	0.0931814	1.09236e-10	1.27337e-09	2.22778e-09	1.73136e-08
K06915	K06915; uncharacterized protein	6.18663	6.70945	5.60604	-1.34123	1.20108	-1.1383	0.0835833	3.22678e-09	2.77042e-08	7.05438e-10	6.04971e-09
K06916	zapE; cell division protein ZapE	5.13543	5.51825	4.58828	-1.07284	0.926691	-1.07591	0.108578	8.64376e-08	5.59645e-07	1.24785e-08	8.2159e-08
K06923	K06923; uncharacterized protein	4.55449	4.93366	3.81964	-1.08621	0.727428	-1.38757	0.0892	6.46237e-10	6.3083e-09	1.3285e-09	1.05011e-08
K06929	K06929; uncharacterized protein	6.22251	7.1326	5.6496	-1.65508	1.4495	-1.09839	0.1084	4.98756e-09	4.14366e-08	8.46072e-09	5.81764e-08
K06938	K06938; uncharacterized protein	4.78408	5.20806	3.81331	-1.37826	0.923809	-1.3756	0.0872	1.79124e-09	1.6059e-08	1.17508e-09	9.66563e-09
K06944	K06944; uncharacterized protein	-0.377478	1.74049	-1.65864	-3.8434	3.52735	-1.01952	0.1244	7.35485e-07	3.33956e-06	1.19655e-07	6.13e-07
K06955	K06955; uncharacterized protein	6.43577	7.08674	5.21937	-1.76766	1.03754	-1.54704	0.0733853	6.89571e-12	1.00021e-10	1.55814e-10	1.57505e-09
K06958	rapZ; RNase adapter protein RapZ	6.30717	8.3228	5.40099	-2.93038	0.694439	-3.97236	0.0226	8.62735e-22	1.16573e-19	4.82692e-14	2.32918e-12
K06988	fno; 8-hydroxy-5-deazaflavin:NADPH oxidoreductase [EC:1.5.1.40]	6.05585	7.95618	4.80009	-3.28003	0.975884	-3.12877	0.064987	3.37703e-13	6.67727e-12	5.53307e-11	6.46665e-10
K06989	nadX, ASPDH; aspartate dehydrogenase [EC:1.4.1.21]	2.58017	4.02803	1.2573	-2.9067	1.83081	-1.49446	0.075	5.03897e-10	4.87026e-09	2.43884e-10	2.3351e-09
K06991	K06991; uncharacterized protein	4.14386	4.59082	3.11385	-1.4392	0.693201	-1.92717	0.0373925	1.73242e-14	4.23318e-13	5.66334e-13	1.62175e-11
K06994	K06994; putative drug exporter of the RND superfamily	7.20443	9.06635	5.8581	-3.3361	1.17571	-2.58052	0.0612	2.04505e-12	3.3602e-11	3.46478e-11	5.00247e-10
K07000	K07000; uncharacterized protein	4.33332	4.61688	3.60717	-1.18094	0.94687	-1.25196	0.0768	2.3402e-09	2.02907e-08	7.24083e-10	6.14994e-09
K07001	K07001; NTE family protein	8.19971	8.94468	7.2596	-1.71955	0.951298	-1.73159	0.0225955	8.16021e-15	2.28202e-13	4.11249e-14	2.04103e-12
K07003	K07003; uncharacterized protein	6.60422	7.05797	5.8513	-1.45888	1.28742	-1.10039	0.081	7.20496e-09	5.80811e-08	5.21183e-10	4.62236e-09
K07005	K07005; uncharacterized protein	3.82394	4.60421	3.32502	-1.26729	1.08876	-1.06491	0.131574	2.2539e-07	1.32392e-06	1.44712e-07	7.61564e-07
K07006	K07006; uncharacterized protein	7.10041	8.22206	5.87289	-2.35944	0.880771	-2.42081	0.0588	2.50385e-15	8.008e-14	2.22366e-11	3.63594e-10
K07011	K07011; uncharacterized protein	6.41883	7.13638	5.88872	-1.31004	1.23313	-1.01027	0.1168	7.80061e-08	5.14978e-07	5.02977e-08	2.92762e-07
K07018	K07018; uncharacterized protein	5.69609	6.23873	4.29766	-1.93807	1.04935	-1.74956	0.060188	1.18558e-13	2.57087e-12	2.91834e-11	4.31457e-10
K07020	K07020; uncharacterized protein	5.73572	7.78437	4.41434	-3.52616	1.23984	-2.65218	0.064787	2.86554e-10	3.05465e-09	5.50764e-11	6.4526e-10
K07023	K07023; putative hydrolases of HD superfamily	4.11439	5.22	2.67535	-2.47331	1.6638	-1.3734	0.0858	1.38995e-10	1.57367e-09	6.4978e-10	5.63872e-09
K07024	SPP; sucrose-6-phosphatase [EC:3.1.3.24]	8.49712	8.90479	7.29386	-1.47802	1.13098	-1.16607	0.136973	8.22355e-09	6.56693e-08	2.36429e-07	1.20591e-06
K07027	K07027; glycosyltransferase 2 family protein	7.49616	8.45652	6.78335	-1.74475	0.858327	-1.85372	0.0589882	2.72941e-11	3.55127e-10	3.0117e-11	4.52883e-10
K07029	dagK; diacylglycerol kinase (ATP) [EC:2.7.1.107]	5.87851	7.96865	3.56208	-4.38803	1.32574	-2.95177	0.0619876	8.6531e-16	3.04554e-14	2.95487e-11	4.48628e-10
K07030	K07030; uncharacterized protein	5.73289	7.80123	4.21935	-3.5445	1.04649	-3.10539	0.0626	3.29504e-16	1.26275e-14	3.62857e-11	5.1016e-10
K07040	K07040; uncharacterized protein	7.3249	8.51812	6.30165	-2.2282	0.810485	-2.55448	0.0587882	1.98264e-15	6.48643e-14	1.83923e-11	3.15064e-10
K07043	K07043; uncharacterized protein	6.41649	7.9362	5.23422	-2.72638	0.798309	-3.30074	0.00300014	2.49439e-25	1.89583e-22	5.99018e-17	1.62303e-14
K07045	K07045; uncharacterized protein	5.12106	5.65973	4.66051	-0.991663	0.853327	-1.10856	0.0981804	7.99946e-09	6.34064e-08	4.64572e-09	3.32224e-08
K07047	nfdA; N-substituted formamide deformylase [EC:3.5.1.91]	7.22841	8.16774	6.06418	-2.32547	0.964207	-2.35203	0.0187963	4.38166e-19	3.15751e-17	1.37677e-14	8.58539e-13
K07052	K07052; uncharacterized protein	8.07663	8.8899	7.46108	-1.41606	1.04336	-1.22585	0.094781	1.40734e-09	1.3033e-08	2.58131e-09	1.97504e-08
K07053	E3.1.3.97; 3',5'-nucleoside bisphosphate phosphatase [EC:3.1.3.97]	7.11269	8.19031	6.27308	-1.99701	0.721617	-2.57852	0.0559888	7.1253e-16	2.54998e-14	1.53155e-11	2.71479e-10
K07058	K07058; membrane protein	8.18955	9.02901	7.39769	-1.51727	0.901511	-1.62442	0.0359928	1.32766e-13	2.87049e-12	5.09001e-13	1.51831e-11
K07062	fitB; toxin FitB [EC:3.1.-.-]	7.72265	8.29043	6.54581	-1.69445	0.89916	-1.66948	0.0961808	1.15167e-09	1.08751e-08	1.91044e-09	1.5069e-08
K07067	disA; diadenylate cyclase [EC:2.7.7.85]	5.74888	7.79427	4.44761	-3.44215	1.19705	-2.60741	0.0663867	5.08143e-11	6.28332e-10	5.06644e-11	6.22221e-10
K07068	K07068; uncharacterized protein	5.90216	7.37512	4.87244	-2.52861	0.939269	-2.53954	0.0639872	3.83175e-13	7.46148e-12	3.1728e-11	4.69106e-10
K07074	K07074; uncharacterized protein	0.691158	-0.547737	1.90962	2.48618	2.39926	1.01698	0.1202	1.23272e-07	7.10906e-07	5.16825e-08	2.91623e-07
K07082	K07082; UPF0755 protein	7.82254	8.65121	6.52266	-2.21893	1.0086	-2.12047	0.0221956	2.9233e-17	1.42956e-15	3.83601e-14	1.93595e-12
K07090	K07090; uncharacterized protein	9.81959	10.407	9.07783	-1.06934	0.97427	-1.02001	0.1452	1.73397e-07	1.05923e-06	4.20508e-07	2.03793e-06
K07093	K07093; uncharacterized protein	5.17063	5.6405	4.70805	-0.919745	0.762012	-1.15517	0.0987802	4.05289e-08	2.80807e-07	5.65032e-09	3.96165e-08
K07098	K07098; uncharacterized protein	6.52373	7.08297	5.96562	-1.26846	1.08869	-1.14372	0.0889822	2.70897e-09	2.36126e-08	1.38586e-09	1.11725e-08
K07101	K07101; uncharacterized protein	5.84532	8.05434	4.32442	-3.68044	0.690794	-4.82614	0.00660006	2.37562e-25	1.9478e-22	4.20241e-16	6.07525e-14
K07107	ybgC; acyl-CoA thioester hydrolase [EC:3.1.2.-]	8.90655	9.53914	8.23562	-1.12204	0.952747	-1.09017	0.1278	2.96391e-08	2.13268e-07	8.6656e-08	4.81712e-07
K07115	rlmJ; 23S rRNA (adenine2030-N6)-methyltransferase [EC:2.1.1.266]	4.92188	5.50297	3.81378	-1.84301	0.977771	-1.92386	0.00620007	1.2553e-16	4.96674e-15	4.21582e-16	5.6826e-14
K07119	K07119; uncharacterized protein	6.17214	7.96365	5.06975	-2.89072	0.771468	-3.44699	0.020196	1.11513e-21	1.4325e-19	1.88968e-14	1.10489e-12
K07122	mlaB; phospholipid transport system transporter-binding protein	3.90413	4.86609	3.41516	-1.63486	1.54518	-1.01145	0.122376	5.15804e-08	3.50371e-07	6.92838e-08	3.88161e-07
K07132	MuB; ATP-dependent target DNA activator [EC:3.6.1.3]	0.316009	1.43088	-1.674	-3.05438	1.80488	-1.59011	0.0398	1.54821e-07	5.30523e-07	3.11393e-12	5.80748e-11
K07136	K07136; uncharacterized protein	1.48717	3.48601	0.850316	-2.55134	1.91943	-1.2229	0.109	1.1768e-08	8.9069e-08	2.54807e-08	1.53306e-07
K07140	K07140; uncharacterized protein	7.08613	8.12241	5.20153	-2.91629	0.689597	-3.73696	0.0163967	1.15612e-21	1.47325e-19	6.65336e-15	4.78122e-13
K07141	mocA; molybdenum cofactor cytidylyltransferase [EC:2.7.7.76]	5.01493	5.26717	4.44411	-0.898444	0.74647	-1.12096	0.0808	3.31387e-08	2.32492e-07	1.14386e-09	9.20761e-09
K07146	K07146; UPF0176 protein	7.01019	7.80928	6.53542	-1.14701	1.00849	-1.10156	0.1104	9.54047e-09	7.50484e-08	2.20734e-08	1.387e-07
K07147	msrP; methionine sulfoxide reductase catalytic subunit [EC:1.8.-.-]	4.48892	5.22164	3.67727	-1.64254	1.10053	-1.42368	0.0426	6.24759e-12	8.82381e-11	2.22774e-12	4.97985e-11
K07149	K07149; uncharacterized protein	3.34194	5.12611	0.567398	-4.74609	1.98385	-2.20985	0.0321936	4.62066e-15	8.13414e-14	2.19113e-13	7.67106e-12
K07150	K07150; uncharacterized protein	3.5165	5.17229	1.819	-3.54332	1.5779	-2.17766	0.0188	1.52997e-18	9.97959e-17	1.02878e-14	6.71464e-13
K07156	copC, pcoC; copper resistance protein C	4.7457	5.55161	2.33808	-3.22401	1.47473	-2.00448	0.0454	4.03554e-15	1.21698e-13	3.21552e-12	6.96037e-11
K07157	K07157; uncharacterized protein	5.56233	5.92735	5.06021	-0.875852	0.787101	-1.04896	0.1112	2.2734e-07	1.339e-06	2.90467e-08	1.77348e-07
K07160	K07160; UPF0271 protein	4.38851	5.16336	3.70745	-1.37059	0.772441	-1.60675	0.0691862	1.28587e-11	1.75032e-10	1.24256e-10	1.28896e-09
K07161	K07161; uncharacterized protein	5.59889	7.4127	4.64902	-2.92598	0.976637	-2.79687	0.0602	1.43881e-15	4.83629e-14	3.69458e-11	5.14651e-10
K07177	K07177; Lon-like protease	5.99446	8.04676	4.49599	-3.64193	1.17348	-2.81427	0.0619876	2.30083e-14	5.84474e-13	4.05654e-11	5.43614e-10
K07183	nasT; two-component system, response regulator / RNA-binding antiterminator	6.20957	8.11445	4.97529	-3.14272	0.863691	-3.41078	0.0167967	4.60515e-22	7.0498e-20	6.00974e-15	4.38746e-13
K07213	ATOX1, ATX1, copZ, golB; copper chaperone	4.49171	4.88308	3.79384	-1.04024	0.675264	-1.41512	0.0736	5.30966e-11	6.20994e-10	1.85107e-10	1.80248e-09
K07219	K07219; putative molybdopterin biosynthesis protein	1.2184	2.52609	0.580573	-1.83392	1.56551	-1.13886	0.116377	4.91495e-08	2.86922e-07	4.01396e-08	2.31104e-07
K07220	K07220; uncharacterized protein	7.05308	7.86893	5.55075	-2.47764	1.09541	-2.20532	0.0191962	5.14711e-17	2.31918e-15	1.35336e-14	8.35621e-13
K07232	CHAC, chaC; glutathione-specific gamma-glutamylcyclotransferase [EC:4.3.2.7]	3.83861	4.24087	2.75891	-1.40928	0.819052	-1.58571	0.0533893	4.29028e-11	5.1722e-10	2.09587e-11	3.16962e-10
K07233	pcoB, copB; copper resistance protein B	2.86771	3.58757	2.24339	-1.35003	1.17641	-1.05343	0.130774	7.92962e-07	3.96982e-06	1.49948e-07	7.7864e-07
K07238	TC.ZIP, zupT, ZRT3, ZIP2; zinc transporter, ZIP family	5.22445	6.06336	4.21438	-1.90852	0.862951	-2.19563	0.00639878	2.14371e-18	1.36452e-16	1.84467e-16	3.28769e-14
K07241	nixA; high-affinity nickel-transport protein	2.26872	3.62071	0.821904	-2.77128	1.21489	-2.04473	0.059788	7.51574e-13	1.26087e-11	3.13733e-11	4.57096e-10
K07243	FTR, FTH1, efeU; high-affinity iron transporter	4.87267	6.22841	3.73752	-2.56403	1.23585	-1.96737	0.0631874	1.75307e-12	2.91054e-11	5.15325e-11	6.27592e-10
K07245	pcoD; copper resistance protein D	4.70026	5.55943	2.60839	-2.93295	1.52158	-1.80888	0.0594	1.5936e-13	3.37087e-12	2.96139e-11	4.32061e-10
K07246	ttuC, dmlA; tartrate dehydrogenase/decarboxylase / D-malate dehydrogenase [EC:1.1.1.93 4.1.1.73 1.1.1.83]	5.06057	5.46605	3.70928	-1.72945	0.869132	-1.85068	0.049	3.89619e-13	7.3622e-12	8.52368e-12	1.55968e-10
K07250	gabT; 4-aminobutyrate aminotransferase / (S)-3-amino-2-methylpropionate transaminase [EC:2.6.1.19 2.6.1.22]	4.55212	5.50289	3.68713	-2.12127	1.42414	-1.45443	0.0655869	8.28237e-11	9.83213e-10	5.33862e-11	6.51375e-10
K07259	dacB; serine-type D-Ala-D-Ala carboxypeptidase/endopeptidase (penicillin-binding protein 4) [EC:3.4.16.4 3.4.21.-]	7.24411	8.3288	6.29377	-1.99842	0.788283	-2.3834	0.0641872	4.0749e-14	9.79515e-13	5.7921e-11	6.82871e-10
K07262	pbpG; serine-type D-Ala-D-Ala endopeptidase (penicillin-binding protein 7) [EC:3.4.21.-]	4.50827	5.08494	3.06098	-1.98132	0.989909	-1.88646	0.0105979	1.52079e-14	3.81607e-13	1.98369e-15	1.79204e-13
K07278	tamA; translocation and assembly module TamA	4.61395	5.35362	3.99486	-1.39011	1.03727	-1.29571	0.0686	7.46991e-11	8.81032e-10	1.68578e-10	1.65725e-09
K07282	capA, pgsA; gamma-polyglutamate biosynthesis protein CapA	3.80337	4.53945	3.22152	-1.34669	1.0657	-1.17768	0.10238	6.20984e-09	4.98211e-08	6.69491e-09	4.60298e-08
K07284	srtA; sortase A [EC:3.4.22.70]	6.2723	8.32162	4.95078	-3.36068	1.0758	-2.85551	0.0582	1.37876e-15	4.65948e-14	3.12016e-11	4.64905e-10
K07287	bamC; outer membrane protein assembly factor BamC	4.45023	5.16059	3.50283	-1.80664	1.15609	-1.52508	0.0314	1.97966e-12	3.15579e-11	4.12715e-13	1.25818e-11
K07289	asmA; AsmA protein	5.5902	6.08418	4.73702	-1.6711	1.38308	-1.20612	0.0585883	2.51539e-09	2.20597e-08	5.19625e-11	6.36694e-10
K07290	yhjG; AsmA family protein	3.64385	4.10002	2.52546	-1.52938	0.874924	-1.56427	0.0732	1.14147e-11	1.53079e-10	2.05772e-10	1.99312e-09
K07304	msrA; peptide-methionine (S)-S-oxide reductase [EC:1.8.4.11]	8.58125	9.42076	7.50007	-1.73777	0.948581	-1.68383	0.0569886	1.62693e-13	3.45434e-12	2.49661e-11	3.96984e-10
K07320	prmB; ribosomal protein L3 glutamine methyltransferase [EC:2.1.1.298]	4.53693	5.25652	3.70378	-1.66448	1.09365	-1.49392	0.0344	1.37841e-12	2.28782e-11	6.76134e-13	1.84736e-11
K07323	mlaC; phospholipid transport system substrate-binding protein	5.28472	6.12711	4.63562	-1.41249	1.27884	-1.15394	0.0754	3.40146e-09	2.90524e-08	2.29248e-10	2.19546e-09
K07335	bmpA, bmpB, tmpC; basic membrane protein A and related proteins	6.06141	8.02371	4.48083	-3.51876	0.951871	-3.50957	0.00839837	1.88258e-23	4.8191e-21	6.4804e-16	8.28688e-14
K07397	yhfA; putative redox protein	7.3526	8.43075	6.73873	-1.49533	1.05924	-1.33294	0.0619876	4.36342e-11	5.46836e-10	4.78784e-11	6.0026e-10
K07399	resB, ccs1; cytochrome c biogenesis protein	5.99879	6.86992	5.28759	-1.22921	1.09887	-1.07815	0.135173	5.17365e-08	3.53894e-07	1.33137e-07	7.08668e-07
K07402	xdhC; xanthine dehydrogenase accessory factor	6.48327	8.10401	5.65555	-2.57321	0.822766	-3.0574	0.0039993	7.54749e-24	2.24126e-21	5.92143e-17	1.61178e-14
K07403	nfeD; membrane-bound serine protease (ClpP class)	5.81889	6.75538	5.05945	-1.82643	1.07262	-1.57505	0.0639872	5.47066e-07	2.9504e-06	5.93262e-11	6.83721e-10
K07442	TRM61, GCD14; tRNA (adenine57-N1/adenine58-N1)-methyltransferase catalytic subunit [EC:2.1.1.219 2.1.1.220]	6.04495	8.08724	4.67419	-3.63734	1.19765	-2.81528	0.0606	4.451e-13	8.54263e-12	4.05791e-11	5.43741e-10
K07448	mrr; restriction system protein	4.3839	5.0484	3.77536	-1.28317	0.945541	-1.27468	0.0769846	4.82962e-09	3.98288e-08	2.52634e-10	2.39281e-09
K07465	K07465; putative RecB family exonuclease	5.9812	8.04561	4.34339	-3.78863	1.31464	-2.67194	0.0637872	5.02488e-12	7.52152e-11	4.05654e-11	5.43614e-10
K07473	dinJ; DNA-damage-inducible protein J	0.500533	1.30508	-0.856124	-2.05385	1.73409	-1.05722	0.120376	2.74035e-05	6.96053e-05	6.28034e-08	3.39683e-07
K07497	K07497; putative transposase	6.42412	7.07424	5.78652	-1.26711	1.1408	-1.09924	0.113377	6.76009e-09	5.4719e-08	1.57981e-08	1.02206e-07
K07503	nucS; endonuclease [EC:3.1.-.-]	5.72356	7.76662	3.63812	-4.00054	1.30367	-2.68489	0.0627874	2.75036e-13	5.53884e-12	3.5669e-11	5.05095e-10
K07552	bcr, tcaB; MFS transporter, DHA1 family, multidrug resistance protein	7.49897	8.19962	6.04548	-2.17413	0.981567	-2.14442	0.0179964	1.18472e-17	6.45409e-16	1.15976e-14	7.43838e-13
K07588	argK; LAO/AO transport system kinase [EC:2.7.-.-]	7.53998	8.42283	6.22997	-2.27875	1.06326	-2.07974	0.0248	2.38155e-17	1.19879e-15	5.48169e-14	2.5515e-12
K07649	tctE; two-component system, OmpR family, sensor histidine kinase TctE [EC:2.7.13.3]	5.34268	5.7199	4.52131	-1.37721	1.19983	-1.17493	0.0931814	3.16153e-08	2.25443e-07	2.38827e-09	1.83995e-08
K07654	mtrB; two-component system, OmpR family, sensor histidine kinase MtrB [EC:2.7.13.3]	4.2862	5.34109	1.84014	-3.54369	1.7598	-1.85961	0.0473905	1.33798e-14	3.55316e-13	4.01853e-12	8.45496e-11
K07667	kdpE; two-component system, OmpR family, KDP operon response regulator KdpE	5.427	6.19585	5.16956	-0.992822	0.835921	-1.14662	0.0885823	7.94741e-09	6.30372e-08	2.78128e-09	2.03443e-08
K07670	mtrA; two-component system, OmpR family, response regulator MtrA	4.30371	5.39149	1.94081	-3.4375	1.6828	-1.89734	0.0477905	1.81482e-14	4.68212e-13	9.16603e-12	1.72079e-10
K07688	fimZ; two-component system, NarL family, response regulator, fimbrial Z protein, FimZ	-1.08644	0.56897	-3.42106	-3.96739	2.64004	-1.46706	0.0248	1.86788e-07	7.18989e-07	9.59613e-13	1.56208e-11
K07708	glnL, ntrB; two-component system, NtrC family, nitrogen regulation sensor histidine kinase GlnL [EC:2.7.13.3]	4.63367	5.341	3.88651	-1.52069	1.07941	-1.37652	0.0506	2.70342e-11	3.45096e-10	1.4407e-11	2.40514e-10
K07726	K07726; putative transcriptional regulator	3.15402	3.89535	1.86767	-1.91183	1.01674	-1.72745	0.0421916	1.59277e-13	3.1592e-12	1.91633e-12	4.40835e-11
K07733	alpA; prophage regulatory protein	2.98482	3.76557	2.44407	-1.30956	1.00087	-1.28813	0.0693861	1.39869e-10	1.52669e-09	2.10037e-10	1.9709e-09
K07736	carD; CarD family transcriptional regulator	7.05972	8.11813	5.15442	-3.04946	1.22659	-2.22749	0.062	1.51335e-13	3.23567e-12	3.84437e-11	5.27019e-10
K07768	senX3; two-component system, OmpR family, sensor histidine kinase SenX3 [EC:2.7.13.3]	6.0075	8.04685	4.48858	-3.67532	1.27486	-2.6303	0.0611878	3.74257e-13	7.3195e-12	3.54696e-11	5.04867e-10
K07774	tctD; two-component system, OmpR family, response regulator TctD	4.19454	4.53852	3.06772	-1.56307	1.12565	-1.26366	0.0973805	3.91719e-09	3.29489e-08	4.78765e-09	3.44698e-08
K07787	cusA, silA; Cu(I)/Ag(I) efflux system membrane protein CusA/SilA	5.91406	6.84632	4.98064	-1.82958	1.2981	-1.36873	0.056	9.56797e-11	1.12586e-09	1.60172e-11	2.7898e-10
K07788	mdtB; multidrug efflux pump	3.31463	3.9257	2.34551	-1.50204	0.946468	-1.4769	0.063	1.01332e-11	1.35947e-10	6.59026e-11	7.49096e-10
K07789	mdtC; multidrug efflux pump	3.32286	3.95686	2.38621	-1.48065	0.920235	-1.47596	0.0622	1.04011e-11	1.38852e-10	7.31347e-11	8.11621e-10
K07793	tctA; putative tricarboxylic transport membrane protein	4.94705	5.25683	3.82657	-1.42621	0.838078	-1.53615	0.072	5.2892e-10	5.24737e-09	2.44208e-10	2.33158e-09
K07794	tctB; putative tricarboxylic transport membrane protein	4.32474	4.64883	3.16425	-1.52818	0.850126	-1.6734	0.040192	6.93986e-12	9.5021e-11	1.38412e-12	3.35288e-11
K07795	tctC; putative tricarboxylic transport membrane protein	4.75422	5.13035	3.57203	-1.6237	0.885234	-1.70846	0.0435913	8.77265e-12	1.2015e-10	1.94948e-12	4.49314e-11
K07798	cusB, silB; membrane fusion protein, Cu(I)/Ag(I) efflux system	6.0105	7.0808	5.17521	-1.83967	1.44196	-1.19714	0.0662	1.85474e-09	1.6724e-08	1.2187e-10	1.26768e-09
K07799	mdtA; membrane fusion protein, multidrug efflux system	3.68934	4.05299	3.27136	-0.783958	0.694527	-1.08169	0.108178	1.94959e-08	1.37354e-07	1.47648e-08	9.16296e-08
K08086	fimV; pilus assembly protein FimV	4.50522	5.17966	3.62667	-1.71329	1.11403	-1.50345	0.036	1.79747e-12	2.89888e-11	4.59319e-13	1.35509e-11
K08169	yebQ; MFS transporter, DHA2 family, multidrug resistance protein	3.04034	3.59504	2.09854	-1.50902	1.04284	-1.35642	0.0716	6.78139e-11	7.80836e-10	2.7886e-10	2.54611e-09
K08234	yaeR; glyoxylase I family protein	5.42524	6.00151	4.82724	-1.46784	1.57028	-1.02927	0.106979	6.40039e-08	4.2995e-07	7.67532e-09	5.3235e-08
K08256	pimA; phosphatidyl-myo-inositol alpha-mannosyltransferase [EC:2.4.1.345]	5.97749	8.05414	4.54927	-3.6347	1.35386	-2.51751	0.0638	2.6688e-11	3.47092e-10	3.64569e-11	5.10084e-10
K08300	rne; ribonuclease E [EC:3.1.26.12]	7.58272	8.5365	6.39895	-2.19291	0.919477	-2.15193	0.0614	1.01363e-13	2.25146e-12	2.88343e-11	4.41566e-10
K08304	mltA; membrane-bound lytic murein transglycosylase A [EC:4.2.2.-]	4.57396	4.96729	3.84496	-1.06321	0.622744	-1.56109	0.068	2.2806e-11	2.91925e-10	8.13298e-11	8.92918e-10
K08305	mltB; membrane-bound lytic murein transglycosylase B [EC:4.2.2.-]	4.95724	5.49089	4.01194	-1.78049	1.04906	-1.6805	0.0167967	3.39828e-14	7.89532e-13	1.27655e-14	7.74455e-13
K08307	mltD, dniR; membrane-bound lytic murein transglycosylase D [EC:4.2.2.-]	6.30494	7.00687	5.66663	-1.43704	1.33283	-1.01189	0.101	7.24811e-08	4.81294e-07	5.50346e-09	3.91087e-08
K08310	nudB, ntpA; dihydroneopterin triphosphate diphosphatase [EC:3.6.1.67]	3.60352	3.98928	2.71829	-1.42129	1.24024	-1.11473	0.1118	9.45986e-08	6.03461e-07	1.8804e-08	1.19628e-07
K08323	rspA, manD; mannonate dehydratase [EC:4.2.1.8]	3.52695	4.12526	1.90705	-2.18865	0.971861	-2.06541	0.00659874	3.12712e-14	7.32424e-13	6.84015e-16	7.77063e-14
K08363	merT; mercuric ion transport protein	0.046658	0.797472	-1.32261	-2.19627	1.77335	-1.13299	0.0994	6.18918e-06	1.63531e-05	1.33992e-08	8.17269e-08
K08372	pepD; putative serine protease PepD [EC:3.4.21.-]	6.06852	8.07218	4.63894	-3.50888	1.19896	-2.67098	0.0616	3.92535e-13	7.64382e-12	3.54492e-11	5.05844e-10
K08681	pdxT, pdx2; 5'-phosphate synthase pdxT subunit [EC:4.3.3.6]	6.05655	8.09689	4.70113	-3.54409	1.15729	-2.85905	0.0576	1.24007e-14	3.33559e-13	2.96099e-11	4.4924e-10
K08691	mcl; malyl-CoA/(S)-citramalyl-CoA lyase [EC:4.1.3.24 4.1.3.25]	4.63527	6.44779	3.3713	-3.11898	1.0281	-2.81021	0.0625875	7.44433e-14	1.68748e-12	4.49047e-11	5.81613e-10
K08776	NPEPPS; puromycin-sensitive aminopeptidase [EC:3.4.11.-]	4.6011	6.3955	3.00346	-3.40493	1.42716	-2.18412	0.0648	4.81426e-07	2.55686e-06	5.4745e-11	6.43648e-10
K08884	K08884; serine/threonine protein kinase, bacterial [EC:2.7.11.1]	8.40417	9.37345	7.48597	-1.90908	0.956542	-1.84499	0.0658	1.06381e-10	1.24522e-09	5.98324e-11	6.91837e-10
K08900	BCS1; mitochondrial chaperone BCS1	-1.97641	-0.569159	-3.46641	-2.88256	2.5982	-1.01549	0.103179	1.12865e-05	3.21117e-05	3.80156e-08	2.03751e-07
K08926	pufA; light-harvesting complex 1 alpha chain	1.43351	3.11541	0.331153	-2.68634	1.44348	-1.76053	0.0617876	7.64933e-13	1.28302e-11	5.65695e-11	6.70979e-10
K08927	pufB; light-harvesting complex 1 beta chain	1.68352	3.77427	0.48193	-3.16291	1.65985	-1.80961	0.0588	4.16376e-14	9.3578e-13	1.64866e-11	2.72225e-10
K08928	pufL; photosynthetic reaction center L subunit	1.38335	3.08827	0.377134	-2.62577	1.47777	-1.66714	0.0639872	2.68814e-12	3.95904e-11	8.17733e-11	8.9186e-10
K08929	pufM; photosynthetic reaction center M subunit	1.44176	3.11808	0.471905	-2.53275	1.39104	-1.68076	0.0662	3.09592e-12	4.52907e-11	1.02435e-10	1.07798e-09
K08930	pucA; light-harvesting protein B-800-850 alpha chain	0.426025	2.68289	-1.38461	-3.73472	2.30557	-1.5136	0.0546	6.76913e-08	2.42057e-07	3.57584e-11	4.54187e-10
K08939	pucB; light-harvesting protein B-800-850 beta chain	0.257741	2.55176	-1.63852	-3.85247	2.39039	-1.53254	0.057	6.51476e-08	2.57855e-07	2.27648e-11	3.14725e-10
K08963	mtnA; methylthioribose-1-phosphate isomerase [EC:5.3.1.23]	6.87572	7.66738	5.77437	-1.87998	0.893694	-1.82127	0.0786	2.75965e-05	8.35845e-05	2.89408e-10	2.73018e-09
K08972	K08972; putative membrane protein	7.39643	8.30872	6.35847	-1.81507	1.03379	-1.66709	0.0439912	5.03636e-14	1.18493e-12	2.26677e-12	5.20194e-11
K08977	cruF; bisanhydrobacterioruberin hydratase [EC:4.2.1.161]	4.97957	6.24605	3.8213	-2.48057	1.63203	-1.48187	0.0504	1.90178e-12	3.13805e-11	1.04574e-11	1.9429e-10
K08978	TC.BAT1; bacterial/archaeal transporter family protein	2.23982	3.04082	1.6245	-1.3453	1.23083	-1.01962	0.133	1.69729e-07	9.72496e-07	1.26364e-07	6.62006e-07
K09005	K09005; uncharacterized protein	6.78137	7.40939	5.68436	-1.70846	0.828409	-1.84149	0.075185	9.39443e-13	1.66498e-11	2.13855e-10	2.09195e-09
K09009	K09009; uncharacterized protein	5.96679	8.05221	4.30204	-3.84038	1.28466	-2.75348	0.0587882	6.17205e-14	1.42772e-12	3.51943e-11	5.02135e-10
K09022	ridA, tdcF, RIDA; 2-iminobutanoate/2-iminopropanoate deaminase [EC:3.5.99.10]	7.43007	8.22689	6.26331	-2.18687	1.24421	-1.71248	0.0437913	2.72076e-14	6.80699e-13	1.97207e-12	4.64049e-11
K09117	K09117; uncharacterized protein	8.25877	8.71375	7.29402	-1.23527	1.08758	-1.06213	0.1578	3.08738e-07	1.77641e-06	1.3133e-06	5.62745e-06
K09118	K09118; uncharacterized protein	7.11649	8.34304	5.78921	-2.53727	1.25223	-1.78238	0.064	3.04007e-08	2.18494e-07	6.95785e-11	7.81336e-10
K09121	larC; pyridinium-3,5-bisthiocarboxylic acid mononucleotide nickel chelatase [EC:4.99.1.12]	6.57421	7.11661	5.51667	-1.57483	1.16194	-1.12587	0.10178	3.14377e-05	9.3934e-05	8.1586e-09	5.63898e-08
K09134	flA; adenosyl-fluoride synthase [EC:2.5.1.63]	6.48806	7.57779	5.79061	-1.93034	1.44166	-1.2574	0.0614	5.98962e-10	5.99732e-09	3.7724e-11	5.13752e-10
K09136	ycaO; ribosomal protein S12 methylthiotransferase accessory factor	2.81023	3.56706	2.22593	-1.29823	1.06666	-1.10824	0.1278	8.95393e-08	5.43842e-07	8.50227e-08	4.67268e-07
K09144	K09144; uncharacterized protein	-1.18928	0.569668	-4.00687	-4.49991	2.68701	-1.60625	0.0216	5.58815e-08	2.41954e-07	2.29793e-13	5.55903e-12
K09158	K09158; uncharacterized protein	6.00607	6.77732	5.3164	-1.57745	1.34316	-1.14008	0.0776	4.86412e-09	4.04325e-08	2.61734e-10	2.48099e-09
K09159	cptB; antitoxin CptB	5.06476	5.5094	4.5013	-1.16959	0.924543	-1.17403	0.0933813	2.05629e-08	1.51157e-07	3.93587e-09	2.88425e-08
K09386	K09386; uncharacterized protein	4.7048	6.58091	3.6097	-2.99436	0.768412	-3.54849	0.012	3.86589e-23	8.55722e-21	1.95845e-15	1.85063e-13
K09457	queF; 7-cyano-7-deazaguanine reductase [EC:1.7.1.13]	6.70214	7.29207	5.59839	-1.56484	0.934818	-1.34366	0.0958	3.40647e-05	0.000100931	2.77932e-09	2.11542e-08
K09691	ABC-2.LPSE.A; lipopolysaccharide transport system ATP-binding protein	6.85895	7.50846	6.37491	-1.19296	0.897287	-1.26918	0.0841832	4.83241e-10	4.91831e-09	6.85981e-10	5.93493e-09
K09692	tagG; teichoic acid transport system permease protein	3.55613	5.071	1.06812	-4.19954	1.92909	-2.04783	0.0208	8.46438e-17	3.55638e-15	2.42247e-14	1.33747e-12
K09693	tagH; teichoic acid transport system ATP-binding protein [EC:3.6.3.40]	3.90021	5.43595	1.21929	-4.37481	1.96775	-2.11823	0.0223955	3.42894e-17	1.58974e-15	1.8207e-14	1.07247e-12
K09701	K09701; uncharacterized protein	4.81041	5.25843	4.03688	-1.13328	0.920658	-1.19622	0.0627874	1.14509e-09	1.06602e-08	7.99556e-11	8.72938e-10
K09748	rimP; ribosome maturation factor RimP	8.01272	8.7469	6.89943	-1.87062	0.936705	-1.90446	0.0398	5.73824e-15	1.67305e-13	1.21669e-12	3.10893e-11
K09760	rmuC; DNA recombination protein RmuC	7.82683	8.64943	6.45629	-2.29304	1.10468	-2.03539	0.0256	1.08326e-16	4.55135e-15	5.39585e-14	2.53015e-12
K09762	K09762; uncharacterized protein	5.37001	7.3682	3.15749	-4.24388	1.24166	-2.99588	0.0287943	7.20007e-20	5.9412e-18	9.29901e-14	3.91383e-12
K09765	queH; epoxyqueuosine reductase [EC:1.17.99.6]	3.35878	3.92393	2.70993	-1.27224	1.04505	-1.18118	0.0928	3.08193e-09	2.58643e-08	4.53401e-09	3.17091e-08
K09767	yajQ; cyclic-di-GMP-binding protein	7.29454	8.54182	6.16859	-2.38789	0.873031	-2.53861	0.0571886	2.34818e-15	7.56463e-14	1.9907e-11	3.36588e-10
K09771	TC.SMR3; small multidrug resistance family-3 protein	3.6114	4.31119	3.12	-1.22815	1.16086	-1.06066	0.0975805	1.54179e-08	1.14696e-07	5.18996e-09	3.55969e-08
K09772	sepF; cell division inhibitor SepF	7.19867	8.19828	5.89843	-2.2675	1.28172	-1.55627	0.0765847	9.4036e-09	7.4247e-08	2.86781e-10	2.71534e-09
K09773	ppsR; [pyruvate, water dikinase]-phosphate phosphotransferase / [pyruvate, water dikinase] kinase [EC:2.7.4.28 2.7.11.33]	5.01902	5.52189	4.13801	-1.44772	0.851454	-1.71353	0.0321936	2.06468e-14	5.09889e-13	2.26927e-13	7.82592e-12
K09801	K09801; uncharacterized protein	4.55004	5.25889	3.71047	-1.68093	1.13234	-1.46177	0.0388	3.33605e-12	5.05667e-11	7.28636e-13	1.97475e-11
K09803	K09803; uncharacterized protein	3.30537	4.47538	2.30591	-1.91068	1.30345	-1.40984	0.0782	3.1979e-11	4.00602e-10	4.27894e-10	3.83676e-09
K09806	K09806; uncharacterized protein	3.55975	4.93968	3.2116	-1.69772	1.47093	-1.08579	0.138572	6.00637e-08	4.02348e-07	3.71635e-07	1.77865e-06
K09807	K09807; uncharacterized protein	5.85135	6.74839	5.25885	-1.75829	1.6514	-1.03364	0.118976	2.02115e-08	1.49867e-07	3.6066e-08	2.16647e-07
K09811	ftsX; cell division transport system permease protein	7.70206	8.59546	6.20044	-2.50176	1.02963	-2.31901	0.0266	6.3966e-18	3.75896e-16	7.50173e-14	3.29424e-12
K09812	ftsE; cell division transport system ATP-binding protein	7.70204	8.59468	6.21971	-2.48519	1.03762	-2.28522	0.0282	7.25103e-18	4.19758e-16	8.3881e-14	3.59824e-12
K09815	znuA; zinc transport system substrate-binding protein	6.43063	7.40978	4.5077	-2.86692	0.973433	-2.47836	0.0583883	4.19448e-15	1.26854e-13	2.33484e-11	3.74917e-10
K09816	znuB; zinc transport system permease protein	6.44248	7.45784	4.51851	-2.89178	1.00451	-2.48442	0.0662	1.83674e-14	4.76329e-13	7.4219e-11	8.28212e-10
K09817	znuC; zinc transport system ATP-binding protein [EC:3.6.3.-]	6.80002	8.01995	4.91655	-3.06091	1.00355	-2.6735	0.067	2.95922e-14	7.33725e-13	5.9424e-11	6.8399e-10
K09823	zur; Fur family transcriptional regulator, zinc uptake regulator	3.84526	5.17344	3.18425	-2.094	1.11106	-1.74293	0.0694	1.54532e-11	2.08141e-10	1.34561e-10	1.37505e-09
K09844	crtC; carotenoid 1,2-hydratase [EC:4.2.1.131]	1.39829	3.08673	0.521715	-2.49391	1.45222	-1.60686	0.0688	8.39918e-12	1.14887e-10	1.3388e-10	1.35016e-09
K09845	crtD; 1-hydroxycarotenoid 3,4-desaturase [EC:1.3.99.27]	1.45517	3.08583	0.703649	-2.32676	1.41042	-1.51356	0.073	5.72984e-11	6.5961e-10	3.73511e-10	3.30393e-09
K09846	crtF; demethylspheroidene O-methyltransferase [EC:2.1.1.210]	1.38295	3.09551	0.371168	-2.63968	1.49158	-1.64947	0.0657868	2.77414e-12	4.01984e-11	7.5807e-11	8.45168e-10
K09847	crtA; spheroidene monooxygenase [EC:1.14.15.9]	0.607835	2.91563	-1.65489	-4.25019	2.1938	-1.84044	0.0303939	2.07518e-10	1.5936e-09	3.00198e-13	9.49458e-12
K09858	K09858; SEC-C motif domain protein	6.01519	6.79006	5.46979	-1.4452	1.2079	-1.17956	0.0775845	9.90127e-10	9.45896e-09	2.19246e-10	2.12614e-09
K09861	K09861; uncharacterized protein	7.46055	8.33783	5.84687	-2.6274	0.924101	-2.67296	0.00799845	7.1741e-21	7.36503e-19	8.7161e-16	9.98392e-14
K09883	cobT; cobaltochelatase CobT [EC:6.6.1.2]	2.35203	4.35708	1.9915	-2.27767	1.9875	-1.03665	0.174765	1.6717e-07	1.00897e-06	8.28774e-06	2.53477e-05
K09888	zapA; cell division protein ZapA	6.53257	7.09483	5.76375	-1.49252	1.12863	-1.29352	0.0598	1.83273e-10	2.03507e-09	4.99842e-11	6.19296e-10
K09889	yjgA; ribosome-associated protein	4.51947	5.25051	3.64895	-1.69654	1.13408	-1.4846	0.0337933	2.44066e-12	3.80341e-11	7.11876e-13	1.93441e-11
K09921	K09921; uncharacterized protein	4.51588	5.19603	3.71421	-1.63411	1.15823	-1.35471	0.0512	4.63527e-11	5.6477e-10	7.30298e-12	1.36762e-10
K09926	K09926; uncharacterized protein	3.89818	4.25808	2.85632	-1.42658	0.953355	-1.36805	0.094	9.95325e-10	9.28355e-09	3.00696e-09	2.24768e-08
K09936	TC.BAT2; bacterial/archaeal transporter family-2 protein	4.37807	5.48147	2.81003	-2.64993	1.41542	-1.79923	0.0337933	8.59757e-15	2.35948e-13	2.81018e-13	9.38634e-12
K09957	K09957; uncharacterized protein	4.32191	6.25468	2.48651	-3.8278	1.36191	-2.503	0.0656	9.47103e-11	1.09756e-09	5.53541e-11	6.46992e-10
K09983	K09983; uncharacterized protein	4.65045	5.18573	3.9442	-1.34999	0.967857	-1.33498	0.0609878	7.22917e-10	7.06217e-09	5.57728e-11	6.68965e-10
K09989	K09989; uncharacterized protein	4.17663	4.54037	3.39783	-1.18901	0.830675	-1.31906	0.0853829	2.45062e-09	2.09313e-08	1.37363e-09	1.10058e-08
K10001	gltI, aatJ; glutamate/aspartate transport system substrate-binding protein	5.24128	5.5397	4.07976	-1.60265	1.05657	-1.41594	0.079784	1.19012e-10	1.36097e-09	5.55438e-10	4.88518e-09
K10002	gltK, aatM; glutamate/aspartate transport system permease protein	4.4724	5.15019	3.20358	-1.98028	0.882999	-2.1774	0.0039993	6.91507e-17	2.89405e-15	1.52255e-16	2.79789e-14
K10003	gltJ, aatQ; glutamate/aspartate transport system permease protein	4.47122	5.14983	3.2069	-1.96863	0.872931	-2.19806	0.00519904	6.92198e-17	2.87243e-15	1.6702e-16	3.00334e-14
K10004	gltL, aatP; glutamate/aspartate transport system ATP-binding protein [EC:3.6.3.-]	4.2372	4.78051	2.93076	-1.86201	0.921337	-1.89752	0.019996	1.52207e-14	3.82118e-13	2.37538e-14	1.26446e-12
K10022	aotJ; arginine/ornithine transport system substrate-binding protein	2.06668	2.95117	0.910148	-2.01986	1.70659	-1.05309	0.1266	2.93687e-07	1.56959e-06	1.06047e-07	5.66976e-07
K10023	aotM; arginine/ornithine transport system permease protein	2.01513	2.93384	0.56222	-2.31529	1.81477	-1.16905	0.111578	6.07581e-08	3.81429e-07	2.83089e-08	1.71087e-07
K10024	aotQ; arginine/ornithine transport system permease protein	2.00258	2.93306	0.554883	-2.30527	1.83541	-1.16703	0.1142	5.84099e-08	3.66964e-07	2.81366e-08	1.70553e-07
K10025	aotP; arginine/ornithine transport system ATP-binding protein [EC:3.6.3.-]	1.99846	2.93442	0.559689	-2.32472	1.81301	-1.14435	0.111578	4.59894e-08	3.02161e-07	2.61577e-08	1.58975e-07
K10027	crtI; phytoene desaturase [EC:1.3.99.26 1.3.99.28 1.3.99.29 1.3.99.31]	7.59028	8.40124	5.58693	-2.96186	1.38037	-2.04302	0.024995	9.26707e-17	3.94745e-15	9.06868e-14	3.80375e-12
K10112	msmX, msmK, malK, sugC, ggtA, msiK; multiple sugar transport system ATP-binding protein	7.30983	8.4534	6.34905	-2.04275	0.768198	-2.43079	0.0361928	4.86589e-17	2.20942e-15	1.75472e-12	4.19082e-11
K10117	msmE; raffinose/stachyose/melibiose transport system substrate-binding protein	5.29786	7.33026	3.44585	-3.99001	1.25634	-2.8977	0.00899825	8.01863e-22	1.06781e-19	6.96339e-16	8.7124e-14
K10118	msmF; raffinose/stachyose/melibiose transport system permease protein	5.61141	7.56112	3.56917	-4.12087	1.29501	-2.93056	0.011	1.31716e-21	1.63696e-19	1.69066e-15	1.69197e-13
K10119	msmG; raffinose/stachyose/melibiose transport system permease protein	5.29798	7.32925	3.39176	-4.02919	1.25613	-2.92393	0.01	7.79373e-22	1.04807e-19	7.10365e-16	8.85843e-14
K10220	ligJ; 4-oxalmesaconate hydratase [EC:4.2.1.83]	3.74588	4.16402	2.33824	-1.86464	0.943372	-1.81691	0.0732	7.33932e-12	1.02995e-10	2.93735e-10	2.76065e-09
K10232	aglE, ggtB; alpha-glucoside transport system substrate-binding protein	2.43782	3.27074	1.22663	-2.1138	1.29515	-1.58332	0.0326	6.19326e-10	4.57269e-09	6.88526e-13	1.8602e-11
K10233	aglF, ggtC; alpha-glucoside transport system permease protein	2.43433	3.26678	1.20025	-2.10994	1.2974	-1.57657	0.0364	1.43164e-09	9.58122e-09	6.42673e-13	1.74752e-11
K10234	aglG, ggtD; alpha-glucoside transport system permease protein	2.43284	3.27083	1.20155	-2.10924	1.2952	-1.55229	0.0338	4.35794e-09	2.37545e-08	6.0475e-13	1.67373e-11
K10439	rbsB; ribose transport system substrate-binding protein	5.85072	6.28679	5.44588	-1.09207	0.838704	-1.2679	0.0487903	6.95266e-11	8.32812e-10	9.83121e-12	1.71563e-10
K10440	rbsC; ribose transport system permease protein	6.54392	8.14288	5.67639	-2.51337	0.801632	-2.9869	0.00639878	3.07172e-23	7.12156e-21	1.6965e-16	3.11842e-14
K10441	rbsA; ribose transport system ATP-binding protein [EC:3.6.3.17]	6.33359	8.02717	5.17897	-2.83471	0.879695	-3.0776	0.005399	8.40914e-24	2.50028e-21	1.50605e-16	2.88624e-14
K10533	E3.3.2.8; limonene-1,2-epoxide hydrolase [EC:3.3.2.8]	4.2943	6.24572	2.27054	-4.01578	1.37791	-2.55471	0.066	5.04141e-11	6.1404e-10	5.00855e-11	6.14088e-10
K10543	xylF; D-xylose transport system substrate-binding protein	5.99109	7.99909	3.80912	-4.13321	1.0093	-3.68456	0.0128	1.76107e-22	3.21234e-20	2.21112e-15	2.04754e-13
K10544	xylH; D-xylose transport system permease protein	5.99774	7.99865	3.78431	-4.15901	0.99235	-3.72848	0.0138	1.81819e-22	3.30999e-20	2.73661e-15	2.39691e-13
K10545	xylG; D-xylose transport system ATP-binding protein [EC:3.6.3.17]	5.99729	7.9999	3.81719	-4.13739	1.01176	-3.70797	0.015	2.58562e-22	4.42347e-20	2.73455e-15	2.39732e-13
K10674	ectD; ectoine hydroxylase [EC:1.14.11.55]	1.86042	2.92283	1.18653	-1.79296	1.44174	-1.14355	0.120376	2.90362e-08	2.0041e-07	7.64503e-08	4.16614e-07
K10680	nemA; N-ethylmaleimide reductase [EC:1.-.-.-]	5.75449	6.51012	5.29946	-1.28755	0.985969	-1.24529	0.0713857	1.68936e-10	1.88612e-09	1.76311e-10	1.73168e-09
K10763	hda; DnaA-homolog protein	4.52648	5.25677	3.67601	-1.68906	1.1387	-1.46775	0.0387923	3.08893e-12	4.73125e-11	1.06194e-12	2.67271e-11
K10764	metZ; O-succinylhomoserine sulfhydrylase [EC:2.5.1.-]	6.08939	6.76069	5.09889	-1.90003	1.35636	-1.4225	0.0478	1.15751e-11	1.60894e-10	8.09195e-12	1.54023e-10
K10778	ada; AraC family transcriptional regulator, regulatory protein of adaptative response / methylated-DNA-[protein]-cysteine methyltransferase [EC:2.1.1.63]	4.28197	4.70934	3.64461	-1.13602	0.794343	-1.38819	0.0596	5.54632e-11	6.56401e-10	3.54507e-11	4.70857e-10
K10804	tesA; acyl-CoA thioesterase I [EC:3.1.2.- 3.1.1.5]	5.26701	5.51297	4.48063	-1.16141	1.09561	-1.03323	0.145771	2.62484e-08	1.89413e-07	3.4873e-07	1.6891e-06
K10805	tesB; acyl-CoA thioesterase II [EC:3.1.2.-]	6.2267	8.31228	4.93556	-3.41217	1.04303	-2.98988	0.0639872	3.3577e-12	5.22883e-11	5.4663e-11	6.43218e-10
K10806	yciA; acyl-CoA thioesterase YciA [EC:3.1.2.-]	4.18456	4.58676	3.34477	-1.2504	0.748394	-1.53191	0.086	1.97849e-10	2.09085e-09	8.97785e-10	7.49049e-09
K10843	ERCC3, XPB; DNA excision repair protein ERCC-3 [EC:3.6.4.12]	4.30538	5.29044	1.92733	-3.41852	1.66683	-1.91919	0.047	9.76945e-15	2.67385e-13	4.03981e-12	8.49133e-11
K10857	exoX; exodeoxyribonuclease X [EC:3.1.11.-]	0.619804	1.34278	-0.589224	-1.95007	1.49732	-1.18865	0.0894	8.79741e-06	2.2397e-05	3.51295e-09	2.44318e-08
K10941	fleQ, flrA; sigma-54 dependent transcriptional regulator, flagellar regulatory protein	2.79854	4.04203	1.71775	-2.29629	1.97363	-1.07688	0.124175	5.97965e-08	4.00515e-07	5.74017e-08	3.27229e-07
K11068	hlyIII; hemolysin III	6.29359	8.24941	5.24638	-2.95876	0.712456	-3.88286	0.0276	3.54734e-21	3.91679e-19	6.75004e-14	3.03396e-12
K11073	potF; putrescine transport system substrate-binding protein	3.90781	4.28576	2.87028	-1.36498	0.815127	-1.51995	0.0788	2.01933e-10	2.10782e-09	6.93119e-10	5.90992e-09
K11074	potI; putrescine transport system permease protein	3.8385	4.24736	2.7803	-1.44473	0.805225	-1.64407	0.0715857	2.65901e-11	3.27743e-10	2.31859e-10	2.21458e-09
K11075	potH; putrescine transport system permease protein	3.83672	4.24359	2.72081	-1.51383	0.835989	-1.66993	0.0724	2.15695e-11	2.69526e-10	2.09952e-10	2.02586e-09
K11076	potG; putrescine transport system ATP-binding protein	6.02774	6.5806	4.05954	-2.62553	0.985134	-2.21598	0.0336	2.48352e-15	7.88919e-14	4.51776e-13	1.37191e-11
K11103	dctA; aerobic C4-dicarboxylate transport protein	4.82071	5.06655	4.23642	-0.872698	0.806024	-1.02828	0.129574	1.07589e-07	6.7728e-07	1.20383e-07	6.40894e-07
K11159	K11159; carotenoid cleavage dioxygenase	5.88288	7.48247	4.3721	-3.10203	1.12969	-2.48422	0.0502	3.86886e-17	1.81337e-15	3.71953e-12	7.95763e-11
K11209	yghU, yfcG; GSH-dependent disulfide-bond oxidoreductase [EC:1.8.4.-]	5.60592	6.01719	4.66726	-1.3718	0.815944	-1.56781	0.0664	4.13766e-11	5.13213e-10	7.94821e-11	8.8398e-10
K11211	kdkA; 3-deoxy-D-manno-octulosonic acid kinase [EC:2.7.1.166]	1.53773	2.83499	0.436093	-2.35967	1.91219	-1.14098	0.1164	5.25077e-07	2.70415e-06	2.93813e-08	1.77652e-07
K11212	cofD; LPPG:FO 2-phospho-L-lactate transferase [EC:2.7.8.28]	5.77165	7.88984	4.42399	-3.56193	1.21855	-2.73499	0.0652	7.37044e-10	7.2047e-09	5.37249e-11	6.38254e-10
K11250	leuE; leucine efflux protein	1.32535	3.42592	0.0271569	-2.74701	2.32036	-1.14241	0.118	1.24457e-08	9.32591e-08	4.49049e-08	2.59856e-07
K11263	bccA, pccA; acetyl-CoA/propionyl-CoA carboxylase, biotin carboxylase, biotin carboxyl carrier protein [EC:6.4.1.2 6.4.1.3 6.3.4.14]	6.17301	8.06666	4.73246	-3.44362	1.12753	-2.79863	0.062	5.65974e-15	1.65189e-13	2.97118e-11	4.50268e-10
K11333	bchX; 3,8-divinyl chlorophyllide a/chlorophyllide a reductase subunit X [EC:1.3.7.14 1.3.7.15]	1.38532	3.09373	0.379984	-2.64326	1.4598	-1.65314	0.0682	3.32965e-12	4.79959e-11	8.8229e-11	9.54565e-10
K11334	bchY; 3,8-divinyl chlorophyllide a/chlorophyllide a reductase subunit Y [EC:1.3.7.14 1.3.7.15]	1.38362	3.0918	0.376774	-2.62853	1.45526	-1.66211	0.0652	4.24241e-12	5.61562e-11	7.95395e-11	8.80487e-10
K11335	bchZ; 3,8-divinyl chlorophyllide a/chlorophyllide a reductase subunit Z [EC:1.3.7.14 1.3.7.15]	1.44879	3.11774	0.472407	-2.53736	1.37598	-1.69982	0.0637872	2.71903e-12	4.11689e-11	9.95385e-11	1.06041e-09
K11336	bchF; 3-vinyl bacteriochlorophyllide hydratase [EC:4.2.1.165]	1.37958	3.08834	0.375847	-2.6568	1.48202	-1.6576	0.0666	3.68646e-12	5.09815e-11	8.43147e-11	9.24954e-10
K11337	bchC; bacteriochlorophyllide a dehydrogenase [EC:1.1.1.396]	1.38462	3.0896	0.380662	-2.63862	1.46915	-1.67959	0.0658	3.06791e-12	4.38617e-11	8.53749e-11	9.32297e-10
K11381	bkdA; 2-oxoisovalerate dehydrogenase E1 component [EC:1.2.4.4]	6.36648	7.72244	5.46897	-2.20992	1.48786	-1.41214	0.045191	1.2956e-11	1.7869e-10	3.23915e-12	7.02993e-11
K11472	glcE; glycolate oxidase FAD binding subunit	6.6838	7.23816	5.59406	-1.60037	0.876231	-1.65599	0.0792	7.23754e-12	1.04612e-10	3.92511e-10	3.57519e-09
K11473	glcF; glycolate oxidase iron-sulfur subunit	7.05428	7.61921	5.94502	-1.64503	0.731485	-2.06127	0.0721856	4.992e-13	9.43779e-12	1.64015e-10	1.65185e-09
K11689	dctQ; C4-dicarboxylate transporter, DctQ subunit	3.09821	4.31159	2.21283	-2.04648	1.08823	-1.69238	0.0691862	7.3367e-13	1.30022e-11	1.10874e-10	1.16534e-09
K11690	dctM; C4-dicarboxylate transporter, DctM subunit	3.32994	4.44088	2.62552	-1.75809	0.998383	-1.61898	0.0611878	1.68656e-12	2.73956e-11	2.53603e-11	3.74981e-10
K11748	kefG; glutathione-regulated potassium-efflux system ancillary protein KefG	-2.23736	-3.84457	0.612925	5.22021	3.88918	1.25996	0.06	1.27646e-08	7.6441e-08	3.58176e-10	2.89212e-09
K11755	hisIE; phosphoribosyl-ATP pyrophosphohydrolase / phosphoribosyl-AMP cyclohydrolase [EC:3.6.1.31 3.5.4.19]	6.95453	7.99912	6.42962	-1.42645	1.20888	-1.06541	0.111578	5.17971e-08	3.55172e-07	2.5174e-08	1.563e-07
K11779	fbiC; FO synthase [EC:2.5.1.77]	5.73152	7.82471	4.34544	-3.57838	1.26974	-2.59805	0.062	6.16557e-10	6.12954e-09	4.76992e-11	6.08191e-10
K11781	cofH; FO synthase subunit 2 [EC:2.5.1.77]	1.13356	2.38634	0.0919504	-3.04649	2.68501	-1.05252	0.0948	8.56634e-06	2.73223e-05	5.59524e-09	3.90729e-08
K11783	mqnB; futalosine hydrolase [EC:3.2.2.26]	2.04996	3.37583	1.30519	-1.94795	1.61865	-1.02414	0.1244	4.40297e-06	1.70015e-05	1.088e-07	5.8885e-07
K11811	arsH; arsenical resistance protein ArsH	3.45925	3.86305	2.67374	-1.28962	1.15096	-1.08213	0.1306	4.12754e-08	2.82318e-07	1.49112e-07	7.81454e-07
K11890	impM; type VI secretion system protein ImpM	2.43142	3.14681	1.36851	-1.67271	1.51657	-1.0179	0.160968	4.7186e-07	2.50748e-06	1.81747e-06	7.02277e-06
K11931	pgaB; poly-beta-1,6-N-acetyl-D-glucosamine N-deacetylase [EC:3.5.1.-]	0.988006	1.92282	-0.607911	-2.54702	1.37089	-1.75612	0.0311938	9.24238e-07	2.81038e-06	5.19517e-13	1.33596e-11
K11936	pgaC, icaA; poly-beta-1,6-N-acetyl-D-glucosamine synthase [EC:2.4.1.-]	1.64379	2.56516	-0.0970786	-2.66133	1.49087	-1.69017	0.0433913	8.4859e-07	2.48323e-06	3.30037e-12	6.62825e-11
K11939	rhtA; inner membrane transporter RhtA	5.79736	7.74217	3.68326	-4.01428	1.09094	-3.25341	0.0323935	5.11226e-20	4.3633e-18	2.49874e-13	8.61138e-12
K12064	traV; conjugal transfer pilus assembly protein TraV	-0.34718	0.439666	-1.03909	-1.5082	1.33895	-1.04454	0.124	4.81541e-05	0.000103768	1.94821e-07	8.64347e-07
K12234	cofE, fbiB; coenzyme F420-0:L-glutamate ligase / coenzyme F420-1:gamma-L-glutamate ligase [EC:6.3.2.31 6.3.2.34]	5.77882	7.89121	4.42244	-3.55756	1.18633	-2.80222	0.0633873	5.25298e-10	5.30322e-09	5.38362e-11	6.39019e-10
K12262	cybB; cytochrome b561	5.60442	6.13093	4.93155	-1.23192	0.773819	-1.46313	0.0718	7.72697e-11	9.08542e-10	3.43797e-10	3.1633e-09
K12266	norR; anaerobic nitric oxide reductase transcription regulator	1.93596	2.87104	1.05184	-1.97461	1.77436	-1.15296	0.0927814	2.38883e-08	1.35358e-07	3.34354e-09	2.43351e-08
K12339	cysM; cysteine synthase B [EC:2.5.1.47]	7.3971	8.37255	5.73009	-2.75562	0.894917	-2.83394	0.0136	1.65428e-20	1.56086e-18	3.72419e-15	3.02884e-13
K12410	npdA; NAD-dependent deacetylase [EC:3.5.1.-]	7.49498	8.32968	6.28369	-2.2319	1.0984	-1.93577	0.0331934	5.19068e-16	1.91269e-14	3.50347e-13	1.12682e-11
K12503	E2.5.1.68; short-chain Z-isoprenyl diphosphate synthase [EC:2.5.1.68]	4.28837	5.34369	1.85181	-3.52692	1.75757	-1.84558	0.0463907	2.18456e-14	5.54415e-13	4.93621e-12	1.00703e-10
K12510	tadB; tight adherence protein B	6.64472	7.9818	5.48063	-2.63279	0.927891	-2.75305	0.061	1.60961e-13	3.42152e-12	4.11751e-11	5.49227e-10
K12511	tadC; tight adherence protein C	6.05704	7.95767	5.08191	-2.88773	0.916354	-2.92781	0.0598	2.16625e-13	4.47406e-12	4.67565e-11	5.97965e-10
K12541	lapB; ATP-binding cassette, subfamily C, bacterial LapB	2.52299	3.09268	1.61949	-1.38784	1.204	-1.10073	0.117377	5.27763e-08	3.4796e-07	3.34419e-08	1.97833e-07
K12542	lapC; membrane fusion protein, adhesin transport system	2.5216	3.0929	1.63658	-1.41076	1.20218	-1.11112	0.1128	5.22949e-08	3.45704e-07	3.2775e-08	1.94995e-07
K12574	rnj; ribonuclease J [EC:3.1.-.-]	7.50931	8.42255	6.16388	-2.24327	1.1018	-1.81744	0.0675865	1.98511e-10	2.19704e-09	1.04837e-10	1.11235e-09
K12583	mgtA; phosphatidylinositol alpha 1,6-mannosyltransferase [EC:2.4.1.-]	2.49412	3.05982	0.524461	-2.34798	1.78961	-1.09282	0.1324	3.39138e-07	1.64782e-06	1.92624e-07	9.82295e-07
K12942	abgT; aminobenzoyl-glutamate transport protein	-0.205673	-1.69855	0.907585	2.62682	1.92153	1.24713	0.069786	4.25709e-05	9.35679e-05	2.65838e-10	2.31198e-09
K12957	yjgB; uncharacterized zinc-type alcohol dehydrogenase-like protein [EC:1.-.-.-]	4.67845	3.49671	6.40053	3.23957	2.00353	1.45143	0.0764	4.73892e-08	3.25342e-07	2.92161e-10	2.76e-09
K12960	mtaD; 5-methylthioadenosine/S-adenosylhomocysteine deaminase [EC:3.5.4.31 3.5.4.28]	3.87571	4.65239	3.1502	-1.49096	1.20147	-1.10206	0.1182	7.89431e-06	2.82981e-05	3.89643e-08	2.31446e-07
K12972	ghrA; glyoxylate/hydroxypyruvatereductase [EC:1.1.1.79 1.1.1.81]	4.21062	4.5675	3.22605	-1.40906	0.965655	-1.35342	0.0869826	1.09008e-09	1.00784e-08	1.49798e-09	1.19972e-08
K12976	pagL; lipid A 3-O-deacylase [EC:3.1.-.-]	1.75848	2.83175	0.358955	-2.39365	1.9051	-1.2213	0.0869826	6.50549e-06	1.46928e-05	1.50646e-09	1.19114e-08
K12979	lpxO; beta-hydroxylase [EC:1.14.11.-]	2.68786	3.3735	1.18903	-2.10859	1.62371	-1.21953	0.10118	6.99266e-09	5.30652e-08	6.21964e-09	4.31412e-08
K12993	wbpX; alpha-1,2-rhamnosyltransferase [EC:2.4.1.-]	-1.034	0.22071	-3.14787	-3.28078	2.70849	-1.09794	0.1006	2.1912e-06	7.26993e-06	1.77338e-08	1.03194e-07
K13256	psiE; protein PsiE	0.716474	3.77112	-0.44249	-3.66674	2.44362	-1.31729	0.106779	1.70369e-09	1.50561e-08	1.80023e-08	1.11899e-07
K13288	orn, REX2, REXO2; oligoribonuclease [EC:3.1.-.-]	6.24046	8.29591	5.09551	-3.17078	0.730882	-4.03747	0.0261948	1.75238e-21	2.08768e-19	9.44944e-14	3.96642e-12
K13527	mpa; proteasome-associated ATPase	5.75754	7.81151	4.27566	-3.55013	1.20508	-2.69872	0.0623875	1.39281e-10	1.58436e-09	5.53466e-11	6.46728e-10
K13570	pup; prokaryotic ubiquitin-like protein Pup	5.74255	7.80457	4.24459	-3.55724	1.22278	-2.65946	0.0658	1.26187e-10	1.44821e-09	5.50287e-11	6.45023e-10
K13571	pafA; proteasome accessory factor A [EC:6.3.1.19]	6.75169	8.81219	5.26974	-3.55882	1.19071	-2.76536	0.0635873	1.36805e-10	1.56396e-09	5.53784e-11	6.46898e-10
K13572	pafB; proteasome accessory factor B	5.90009	7.98517	3.6519	-4.34765	1.24315	-3.05909	0.0619876	5.7799e-15	1.68057e-13	4.008e-11	5.40041e-10
K13573	pafC; proteasome accessory factor C	5.79858	7.84245	4.5002	-3.4995	1.20379	-2.65802	0.0625875	1.49151e-11	2.03129e-10	4.40753e-11	5.76001e-10
K13633	ftrA; AraC family transcriptional regulator, transcriptional activator FtrA	-1.87851	-3.46364	-0.537191	2.92146	2.56492	1.08479	0.0729854	2.41191e-06	7.96821e-06	2.63426e-09	1.69535e-08
K13634	cysB; LysR family transcriptional regulator, cys regulon transcriptional activator	4.16935	4.52697	3.32588	-1.26829	0.964015	-1.32867	0.085	2.74447e-09	2.35438e-08	1.06122e-09	8.68419e-09
K13640	hspR; MerR family transcriptional regulator, heat shock protein HspR	6.03819	8.05423	4.72594	-3.41628	1.26037	-2.56125	0.0611878	6.61005e-13	1.21795e-11	4.04944e-11	5.43065e-10
K13643	iscR; Rrf2 family transcriptional regulator, iron-sulfur cluster assembly transcription factor	5.80505	6.13892	5.18162	-1.09742	0.846686	-1.28154	0.0658	1.15505e-09	1.08123e-08	9.46874e-11	1.0213e-09
K13668	pimB; phosphatidyl-myo-inositol dimannoside synthase [EC:2.4.1.346]	6.05642	8.09722	4.38793	-3.87304	1.37509	-2.53139	0.0608	2.15594e-11	2.85366e-10	2.95487e-11	4.48628e-10
K13694	mepS, spr; murein DD-endopeptidase / murein LD-carboxypeptidase [EC:3.4.-.- 3.4.17.13]	1.47631	2.63717	0.119347	-2.30337	1.82243	-1.16113	0.102979	5.35349e-08	2.99178e-07	7.96519e-09	5.31423e-08
K13774	atuB; citronellol/citronellal dehydrogenase	4.29793	6.29884	2.79687	-3.65223	1.16232	-2.85078	0.0616	3.192e-15	9.82649e-14	3.21687e-11	4.7426e-10
K13775	atuG; citronellol/citronellal dehydrogenase	3.66199	5.20733	2.01711	-3.42028	1.58948	-2.06598	0.0574	3.71578e-14	8.93202e-13	2.46638e-11	3.85926e-10
K13787	idsA; geranylgeranyl diphosphate synthase, type I [EC:2.5.1.1 2.5.1.10 2.5.1.29]	6.06201	8.08638	4.60103	-3.68409	1.22864	-2.78089	0.0615877	3.72407e-13	7.28465e-12	3.80445e-11	5.24884e-10
K13794	tcuR; LysR family transcriptional regulator, regulatory protein for tcuABC	3.33069	3.90898	2.02761	-1.91331	0.965282	-1.90239	0.0312	4.51421e-14	9.90808e-13	2.27922e-13	7.88922e-12
K13795	citB, tcuB; citrate/tricarballylate utilization protein	3.38161	3.96446	2.07189	-1.85285	0.854524	-2.10097	0.0281944	6.06116e-15	1.49877e-13	1.17725e-13	4.59724e-12
K13796	cobZ, tcuA; tricarballylate dehydrogenase	3.37382	3.9664	2.16688	-1.80362	0.838202	-2.05924	0.0313937	5.66744e-15	1.46537e-13	1.3491e-13	5.16653e-12
K13892	gsiA; glutathione transport system ATP-binding protein	2.73586	3.35534	1.63142	-1.74969	1.21332	-1.37274	0.0617876	5.46795e-11	6.44028e-10	1.23333e-10	1.24849e-09
K13940	sulD; dihydroneopterin aldolase / 2-amino-4-hydroxy-6-hydroxymethyldihydropteridine diphosphokinase [EC:4.1.2.25 2.7.6.3]	4.0642	5.62066	2.31731	-3.40994	1.4874	-2.1975	0.0244	1.5191e-17	7.9423e-16	7.77457e-14	3.35077e-12
K13953	adhP; alcohol dehydrogenase, propanol-preferring [EC:1.1.1.1]	4.3705	5.11439	4.01891	-1.14799	0.829254	-1.32108	0.055189	1.48444e-10	1.65026e-09	1.90846e-11	2.63786e-10
K13991	puhA; photosynthetic reaction center H subunit	1.38805	3.09236	0.380329	-2.64239	1.47303	-1.65885	0.0655869	2.3742e-12	3.57374e-11	7.63477e-11	8.51002e-10
K13992	pufC; photosynthetic reaction center cytochrome c subunit	1.32157	3.00799	0.0792981	-2.75884	1.47209	-1.76364	0.0574	2.02078e-13	3.88459e-12	3.06139e-11	4.15852e-10
K13993	HSP20; HSP20 family protein	7.91312	8.92844	7.03384	-1.9236	0.702419	-2.55946	0.0572	2.29519e-15	7.4095e-14	1.53893e-11	2.73186e-10
K14058	ttcA; tRNA 2-thiocytidine biosynthesis protein TtcA	4.66153	5.33026	3.97092	-1.47922	1.09228	-1.29876	0.0643871	9.80764e-11	1.13344e-09	7.51955e-11	8.39146e-10
K14161	imuB; protein ImuB	5.61912	6.89813	4.9149	-2.02717	0.709293	-2.71523	0.0165967	1.68159e-20	1.57757e-18	7.93176e-15	5.44408e-13
K14162	dnaE2; error-prone DNA polymerase [EC:2.7.7.7]	7.12293	8.29364	5.5294	-2.74611	1.00256	-2.6355	0.0158	1.73806e-20	1.63253e-18	7.8919e-15	5.47619e-13
K14166	ycnJ; copper transport protein	4.66404	6.5633	3.02397	-3.42991	1.33187	-2.31112	0.0628	2.54052e-09	2.20927e-08	5.21151e-11	6.30367e-10
K14205	mprF, fmtC; phosphatidylglycerol lysyltransferase [EC:2.3.2.3]	1.33604	0.801412	2.15649	1.47901	1.41194	1.0017	0.1262	1.53074e-07	7.67366e-07	2.55235e-07	1.14862e-06
K14261	alaC; alanine-synthesizing transaminase [EC:2.6.1.-]	4.85706	5.49966	4.18658	-1.21294	0.92803	-1.24087	0.0891822	6.03324e-10	5.95255e-09	1.68879e-09	1.32701e-08
K14267	dapC; N-succinyldiaminopimelate aminotransferase [EC:2.6.1.17]	5.93292	8.03668	4.56838	-3.4015	0.677244	-4.64698	0.0124	4.37858e-24	1.48291e-21	1.89747e-15	1.81238e-13
K14393	actP; cation/acetate symporter	5.75686	6.2753	5.13442	-1.38523	0.870334	-1.61293	0.0224	2.76525e-13	5.41871e-12	5.35058e-14	2.47321e-12
K14447	ecm; ethylmalonyl-CoA mutase [EC:5.4.99.63]	5.67075	7.78882	4.36511	-3.46532	1.1223	-2.88935	0.063	6.37859e-13	1.17849e-11	4.65942e-11	5.92488e-10
K14448	mcd; (2S)-methylsuccinyl-CoA dehydrogenase [EC:1.3.8.12]	5.04797	6.49055	3.87373	-2.6533	1.19082	-2.18002	0.0655869	2.27219e-11	2.98658e-10	4.2482e-11	5.60477e-10
K14578	nahAb, nagAb, ndoA, nbzAb, dntAb; naphthalene 1,2-dioxygenase ferredoxin component	1.00012	2.45889	-1.01795	-3.24626	2.03418	-1.50314	0.0587882	1.98146e-06	4.79779e-06	3.16426e-11	4.1561e-10
K14633	gra6, RED2; ketoreductase RED2 [EC:1.1.1.-]	4.27113	6.23567	2.13035	-4.18555	1.59324	-2.30075	0.0644	9.54145e-09	7.289e-08	4.34177e-11	5.69057e-10
K14733	limB; limonene 1,2-monooxygenase [EC:1.14.13.107]	4.29246	6.25904	2.29928	-4.0435	1.42313	-2.48192	0.0644	1.02752e-09	9.55723e-09	5.16547e-11	6.24638e-10
K14742	tsaB; tRNA threonylcarbamoyladenosine biosynthesis protein TsaB	7.11264	7.85199	6.02487	-1.76625	1.02774	-1.67077	0.0305939	6.4799e-14	1.49052e-12	2.30803e-13	8.1007e-12
K14941	cofC; 2-phospho-L-lactate guanylyltransferase [EC:2.7.7.68]	5.74901	7.88171	4.40891	-3.58808	1.19432	-2.76881	0.0646	3.45445e-10	3.61739e-09	4.95912e-11	6.17439e-10
K14998	SURF1, SHY1; surfeit locus 1 family protein	5.40071	5.92916	4.04338	-1.83392	1.3448	-1.29766	0.093	3.87931e-10	4.02387e-09	2.13918e-09	1.66568e-08
K15034	yaeJ; ribosome-associated protein	7.81303	8.53806	6.67452	-1.8908	0.895053	-1.97677	0.0407919	1.06947e-15	3.69632e-14	1.11034e-12	2.87563e-11
K15331	TRMT2B, TRM2; tRNA (uracil-5-)-methyltransferase [EC:2.1.1.35]	4.42873	3.2505	6.35682	3.53852	3.01105	1.19938	0.0759848	6.61692e-08	4.39886e-07	2.27743e-10	2.21204e-09
K15372	toa; taurine---2-oxoglutarate transaminase [EC:2.6.1.55]	4.07923	5.06431	2.4534	-2.72947	1.60517	-1.599	0.0684	3.79424e-11	4.77373e-10	9.74438e-11	1.04485e-09
K15383	K15383; MtN3 and saliva related transmembrane protein	3.63976	5.01047	2.95515	-2.00226	1.37258	-1.39766	0.0608	1.87923e-11	2.48357e-10	2.4057e-11	3.55865e-10
K15461	mnmC; tRNA 5-methylaminomethyl-2-thiouridine biosynthesis bifunctional protein [EC:2.1.1.61 1.5.-.-]	4.27996	4.68878	3.16605	-1.51652	0.81097	-1.7313	0.060188	1.59781e-11	2.10684e-10	3.68021e-11	4.86899e-10
K15511	boxA; benzoyl-CoA 2,3-epoxidase subunit A [EC:1.14.13.208]	1.11422	2.45825	-0.3331	-2.59235	2.07378	-1.17972	0.0992	6.13253e-06	1.39134e-05	7.52004e-09	5.08547e-08
K15514	boxD; 3,4-dehydroadipyl-CoA semialdehyde dehydrogenase [EC:1.2.1.77]	0.97282	2.45989	-1.04512	-3.21962	2.10267	-1.40596	0.0761848	6.03872e-07	1.61933e-06	2.98965e-10	2.73553e-09
K15520	mshD; mycothiol synthase [EC:2.3.1.189]	5.98273	8.04868	4.37205	-3.76617	1.28366	-2.62153	0.0627874	5.19979e-12	7.76053e-11	4.14343e-11	5.51406e-10
K15521	mshA; D-inositol-3-phosphate glycosyltransferase [EC:2.4.1.250]	5.99433	8.05054	4.41117	-3.68353	1.26504	-2.61788	0.0627874	8.40525e-12	1.20109e-10	4.10752e-11	5.48345e-10
K15525	mshB; N-acetyl-1-D-myo-inositol-2-amino-2-deoxy-alpha-D-glucopyranoside deacetylase [EC:3.5.1.103]	4.14599	5.3386	1.62295	-3.80355	1.71214	-2.04666	0.0503899	4.67887e-15	1.38437e-13	7.67885e-12	1.47853e-10
K15526	mshC; L-cysteine:1D-myo-inositol 2-amino-2-deoxy-alpha-D-glucopyranoside ligase [EC:6.3.1.13]	5.9843	8.05001	4.36944	-3.75831	1.30037	-2.59647	0.0641872	5.5144e-12	8.18015e-11	4.08418e-11	5.46134e-10
K15576	nrtA, nasF, cynA; nitrate/nitrite transport system substrate-binding protein	4.80862	5.68901	4.38274	-1.30729	1.2219	-1.03321	0.113177	5.50409e-08	3.73595e-07	3.94745e-08	2.32656e-07
K15577	nrtB, nasE, cynB; nitrate/nitrite transport system permease protein	4.73248	5.68475	4.3265	-1.37095	1.23628	-1.05685	0.105979	2.41299e-08	1.75713e-07	1.58967e-08	1.01244e-07
K15578	nrtC, nasD; nitrate/nitrite transport system ATP-binding protein [EC:3.6.3.-]	5.44873	6.01362	4.66952	-1.56874	0.963558	-1.63205	0.030194	2.05907e-12	3.31713e-11	2.67341e-13	9.0842e-12
K15634	gpmB; probable phosphoglycerate mutase [EC:5.4.2.12]	9.14667	10.41	7.62948	-2.71011	0.972457	-2.53963	0.0635873	1.42911e-13	3.079e-12	4.92793e-11	6.11292e-10
K15669	hddC; D-glycero-alpha-D-manno-heptose 1-phosphate guanylyltransferase [EC:2.7.7.71]	1.31808	2.48301	-0.0904164	-2.43879	2.16043	-1.03313	0.135	4.27618e-07	2.19682e-06	3.54006e-07	1.68352e-06
K15724	erpA; iron-sulfur cluster insertion protein	6.49402	7.15689	4.98778	-2.12887	0.789566	-2.37129	0.0315937	6.73166e-17	2.94272e-15	2.46774e-13	8.52174e-12
K15738	uup; ABC transport system ATP-binding/permease protein	7.99608	8.75625	6.9482	-1.8245	0.962503	-1.79173	0.0413917	1.5344e-14	4.04942e-13	1.8649e-12	4.40444e-11
K15762	tmoC, tbuB, touC; toluene monooxygenase system ferredoxin subunit	-0.868244	0.398434	-2.97096	-3.36067	2.98396	-1.02448	0.1134	3.78552e-06	1.22633e-05	3.92179e-08	2.19807e-07
K15778	pmm-pgm; phosphomannomutase / phosphoglucomutase [EC:5.4.2.8 5.4.2.2]	4.44722	5.75886	3.52693	-2.3589	1.60393	-1.46557	0.0752	2.9715e-09	2.56898e-08	2.68841e-10	2.563e-09
K15792	murEF; murE/murF fusion protein [EC:6.3.2.13 6.3.2.10]	2.97723	4.69398	0.744203	-4.02874	2.41444	-1.5641	0.0483903	1.1684e-11	1.39745e-10	4.80811e-12	9.86876e-11
K15866	paaG; 2-(1,2-epoxy-1,2-dihydrophenyl)acetyl-CoA isomerase [EC:5.3.3.18]	6.34996	8.12904	5.50684	-2.65288	0.652416	-3.82744	0.039	5.81109e-20	4.89824e-18	8.93146e-13	2.40969e-11
K16013	cydD; ATP-binding cassette, subfamily C, bacterial CydD	2.7847	3.11062	1.15813	-1.82541	1.55571	-1.01325	0.1676	4.90521e-07	2.56198e-06	3.17611e-06	1.13123e-05
K16014	cydCD; ATP-binding cassette, subfamily C, bacterial CydCD	2.3659	3.47485	0.733924	-2.58032	1.56049	-1.37763	0.1114	9.53584e-10	8.94973e-09	1.58611e-08	1.0229e-07
K16020	rifG, asm47; 5-deoxy-5-amino-3-dehydroquinate synthase	4.90988	6.43034	3.72505	-2.87563	1.4007	-1.83573	0.0644	1.07052e-05	3.63786e-05	5.3437e-11	6.35778e-10
K16066	ydfG; 3-hydroxy acid dehydrogenase / malonic semialdehyde reductase [EC:1.1.1.381 1.1.1.-]	0.34903	1.48702	-0.566588	-1.92541	1.24104	-1.40409	0.092	2.16863e-09	1.61865e-08	3.55136e-09	2.48107e-08
K16090	fiu; catecholate siderophore receptor	4.47102	4.82634	3.68595	-1.09387	0.876456	-1.15737	0.1106	4.60938e-09	3.78498e-08	1.38081e-08	8.88064e-08
K16092	btuB; vitamin B12 transporter	5.71616	6.11282	4.71659	-1.56706	0.953104	-1.68893	0.026	8.53216e-13	1.50557e-11	6.53223e-14	2.93672e-12
K16148	glgM; alpha-maltose-1-phosphate synthase [EC:2.4.1.342]	2.73042	3.63311	1.13603	-2.26913	1.56981	-1.34006	0.089982	5.27561e-10	5.22817e-09	1.62238e-09	1.28606e-08
K16165	nagK; fumarylpyruvate hydrolase [EC:3.7.1.20]	4.66	5.05981	3.69793	-1.41339	1.03748	-1.25972	0.0948	9.00881e-09	7.05216e-08	3.02081e-09	2.27367e-08
K16171	faaH; fumarylacetoacetate (FAA) hydrolase [EC:3.7.1.2]	3.85182	4.23781	2.99754	-1.28881	1.17387	-1.06352	0.1156	8.9545e-08	5.76566e-07	2.90481e-08	1.75936e-07
K16264	czcD, zitB; cobalt-zinc-cadmium efflux system protein	6.23746	6.89692	5.57319	-1.36735	0.782974	-1.49886	0.0978	3.56822e-09	3.03926e-08	3.26244e-09	2.45652e-08
K16329	psuG; pseudouridylate synthase [EC:4.2.1.70]	2.88355	3.82682	2.1645	-1.64631	0.908933	-1.70995	0.033	2.75507e-11	2.48161e-10	4.56258e-13	1.33042e-11
K16347	ecnA; entericidin A	-1.49334	-0.403086	-2.76452	-2.34581	1.93	-1.11955	0.0913817	2.61679e-05	6.08516e-05	1.33897e-08	7.79456e-08
K16692	etk-wzc; tyrosine-protein kinase Etk/Wzc [EC:2.7.10.-]	2.09512	3.0514	0.630232	-2.30121	2.05201	-1.01514	0.1308	1.23634e-05	3.07326e-05	8.84206e-08	4.83165e-07
K16785	ecfT; energy-coupling factor transport system permease protein	6.99402	7.74738	5.80645	-2.09331	1.09682	-1.72791	0.0789842	4.62093e-11	5.76911e-10	3.54539e-10	3.28003e-09
K16787	ecfA2; energy-coupling factor transport system ATP-binding protein [EC:3.6.3.-]	6.99194	7.74576	5.82004	-2.06537	1.08195	-1.71582	0.0776	2.4589e-11	3.2237e-10	3.72012e-10	3.42316e-09
K16843	slcC; (S)-sulfolactate dehydrogenase [EC:1.1.1.310]	3.08404	4.82083	0.423394	-4.56183	1.83901	-2.31408	0.0387923	4.76732e-17	2.14273e-15	1.1107e-12	2.82965e-11
K16845	suyA; (2R)-sulfolactate sulfo-lyase subunit alpha [EC:4.4.1.24]	1.69879	2.86607	0.0593885	-2.73181	2.4821	-1.01438	0.1148	1.47933e-06	6.58237e-06	3.01697e-08	1.82751e-07
K16927	cbrT; energy-coupling factor transport system substrate-specific component	4.31931	5.37619	2.62729	-2.89436	1.60101	-1.72978	0.0619876	2.77739e-12	4.37233e-11	4.29718e-11	5.6315e-10
K17218	sqr; sulfide:quinone oxidoreductase [EC:1.8.5.4]	6.44303	6.98865	5.66447	-1.19966	0.873291	-1.25582	0.091	2.25527e-09	1.99404e-08	2.39723e-09	1.84273e-08
K17227	soxZ; sulfur-oxidizing protein SoxZ	3.4885	4.21829	2.78352	-1.79449	1.7482	-1.0025	0.122376	5.03621e-08	3.41014e-07	6.57124e-08	3.71411e-07
K17247	msrQ; methionine sulfoxide reductase heme-binding subunit	4.52757	5.24472	3.71479	-1.67774	1.0984	-1.49184	0.0367927	2.34006e-12	3.66884e-11	8.76471e-13	2.31398e-11
K17315	gtsA, glcE; glucose/mannose transport system substrate-binding protein	4.39789	5.16166	2.63503	-2.73889	1.69494	-1.61239	0.0259948	2.17147e-13	4.41132e-12	7.31814e-14	3.16551e-12
K17316	gtsB, glcF; glucose/mannose transport system permease protein	4.33756	5.13757	2.51393	-2.89503	1.71321	-1.72943	0.0127975	1.99092e-14	5.02163e-13	2.71141e-15	2.31298e-13
K17317	gtsC, glcG; glucose/mannose transport system permease protein	4.33802	5.13763	2.50717	-2.91531	1.68454	-1.75486	0.0148	1.98068e-14	4.99106e-13	2.79588e-15	2.35836e-13
K17686	copA, ATP7; Cu+-exporting ATPase [EC:3.6.3.54]	8.02565	9.07804	6.94495	-2.14577	0.774193	-2.56389	0.0237953	1.33944e-19	1.05014e-17	2.82634e-14	1.52933e-12
K17828	pyrDI; dihydroorotate dehydrogenase (NAD+) catalytic subunit [EC:1.3.1.14]	6.12181	8.12365	5.22083	-3.14596	1.11385	-2.74638	0.06	1.00332e-14	2.7531e-13	3.80708e-11	5.25158e-10
K17829	ccrA; crotonyl-CoA reductase [EC:1.3.1.86]	5.67529	7.77409	4.19182	-3.65547	1.34756	-2.52111	0.0634	1.37771e-09	1.27097e-08	4.91142e-11	6.15081e-10
K17837	bla2, blm, ccrA, blaB; metallo-beta-lactamase class B [EC:3.5.2.6]	3.03077	3.97759	2.11498	-1.83289	1.48852	-1.1585	0.0982	8.94621e-09	6.87119e-08	5.72026e-09	4.019e-08
K17938	sbmA, bacA; peptide/bleomycin uptake transporter	1.74271	3.9827	0.151074	-3.60067	1.91669	-1.78577	0.0347931	1.02661e-14	2.51484e-13	5.52675e-13	1.54082e-11
K18028	nicX; 2,5-dihydroxypyridine 5,6-dioxygenase [EC:1.13.11.9]	0.933277	2.49967	-0.299382	-2.56371	1.6783	-1.38834	0.0792	3.42453e-10	3.17645e-09	9.91673e-10	7.81523e-09
K18139	oprM, emhC, ttgC, cusC, adeK, smeF, mtrE, cmeC, gesC; outer membrane protein, multidrug efflux system	5.14172	6.00705	4.21722	-1.5695	1.12671	-1.29414	0.0925815	4.13847e-10	4.2595e-09	1.49771e-09	1.19797e-08
K18168	SDHAF2, SDH5; succinate dehydrogenase assembly factor 2	-0.980811	3.09962	-3.87364	-6.14712	5.05548	-1.0907	0.123575	1.21399e-05	2.93129e-05	7.11214e-08	3.91295e-07
K18221	tetX; tetracycline 11a-monooxygenase, tetracycline resistance protein [EC:1.14.13.231]	-0.383401	1.20449	-2.44298	-3.6286	2.47417	-1.35241	0.0558	5.84828e-07	1.87138e-06	3.6655e-11	4.41263e-10
K18292	E4.1.3.25; (S)-citramalyl-CoA lyase [EC:4.1.3.25]	1.52081	2.81129	0.0567431	-2.7543	2.54896	-1.00312	0.118376	7.99352e-06	2.63209e-05	4.65945e-08	2.71347e-07
K18335	K18335; 2-keto-3-deoxy-L-fuconate dehydrogenase [EC:1.1.1.-]	3.91554	4.30402	2.54799	-1.71354	0.837179	-1.83718	0.075	5.61483e-12	8.02101e-11	1.90742e-10	1.87795e-09
K18431	legF, ptmB; CMP-N,N'-diacetyllegionaminic acid synthase [EC:2.7.7.82]	-0.557804	0.376329	-2.40757	-2.76881	1.97073	-1.23879	0.092	7.12653e-05	0.000147214	4.91227e-09	3.28804e-08
K18455	mca; mycothiol S-conjugate amidase [EC:3.5.1.115]	5.74161	7.78295	4.26376	-3.57282	1.22814	-2.65011	0.0619876	1.04343e-09	9.88919e-09	5.45358e-11	6.42454e-10
K18472	accD6; acetyl-CoA/propionyl-CoA carboxylase carboxyl transferase subunit [EC:6.4.1.2 6.4.1.3 2.1.3.15]	3.54959	5.21487	1.21003	-4.16569	1.72972	-2.22598	0.0463907	3.22577e-16	1.21961e-14	3.56612e-12	7.60463e-11
K18480	linN; cholesterol transport system auxiliary component	3.73432	4.34705	3.00864	-1.24092	0.88577	-1.30496	0.105779	2.31547e-09	1.97412e-08	1.3987e-08	9.02215e-08
K18661	matB; malonyl-CoA/methylmalonyl-CoA synthetase [EC:6.2.1.-]	4.04736	4.44278	3.41192	-1.07599	0.701214	-1.49467	0.0632	3.90428e-11	4.76812e-10	8.39399e-11	9.1255e-10
K18697	pgpC; phosphatidylglycerophosphatase C [EC:3.1.3.27]	4.5425	6.24511	2.85712	-3.37416	1.40391	-2.15993	0.0633873	1.94535e-09	1.73185e-08	4.99748e-11	6.1509e-10
K18778	zapD; cell division protein ZapD	4.46153	5.1782	3.46595	-1.8034	1.15177	-1.53791	0.0343931	8.6472e-13	1.48652e-11	4.79126e-13	1.41503e-11
K18798	AFG1, LACE1; peroxisome-assembly ATPase [EC:3.6.4.7]	-0.972456	3.1029	-3.92344	-6.13773	5.02581	-1.07221	0.1236	1.42505e-05	3.19337e-05	8.28033e-08	4.41565e-07
K18843	hicB; antitoxin HicB	-0.740263	0.582749	-2.33888	-2.97166	1.71476	-1.69657	0.0123976	7.10746e-07	1.95036e-06	4.10279e-14	1.41153e-12
K18893	vcaM; ATP-binding cassette, subfamily B, multidrug efflux pump	3.73097	4.14544	2.97091	-1.16029	0.927419	-1.18431	0.0992	9.17865e-09	6.95548e-08	5.76306e-09	3.96381e-08
K18900	bpeT; LysR family transcriptional regulator, regulator for bpeEF and oprC	2.08541	2.96896	0.932946	-1.94542	1.69326	-1.00603	0.1498	5.60869e-06	2.07946e-05	8.90621e-07	3.89843e-06
K18903	oprC, opcM; outer membrane protein, multidrug efflux system	4.13161	4.40708	3.53433	-0.955031	0.957775	-1.02196	0.112577	8.28753e-08	5.31231e-07	3.5088e-08	2.03003e-07
K18917	mrx1; mycoredoxin [EC:1.20.4.3]	2.40547	3.62953	0.80508	-2.70546	1.5694	-1.49842	0.0825835	2.14463e-10	2.25362e-09	7.06409e-10	6.04708e-09
K18955	whiB1_2_3_4; WhiB family transcriptional regulator, redox-sensing transcriptional regulator	8.15084	10.2266	6.65119	-3.69743	1.27397	-2.65183	0.0608	5.48668e-12	8.17082e-11	4.05654e-11	5.43614e-10
K18958	whiB7; WhiB family transcriptional regulator, redox-sensing transcriptional regulator	5.94572	8.0346	3.68638	-4.28661	1.34061	-2.81405	0.060188	1.57516e-13	3.34354e-12	3.3922e-11	4.91475e-10
K18981	udh; uronate dehydrogenase [EC:1.1.1.203]	3.87714	4.31736	2.63239	-1.67343	0.840825	-1.84921	0.0465907	1.45015e-12	2.3055e-11	4.71063e-12	9.34927e-11
K19033	PSRP4, RPS31; 30S ribosomal protein S31	2.34731	3.32541	1.1459	-2.29911	1.90673	-1.11653	0.1022	1.9359e-07	1.10815e-06	9.08574e-09	6.13314e-08
K19157	yafQ; mRNA interferase YafQ [EC:3.1.-.-]	-0.143851	1.09386	-1.65316	-2.6572	1.7499	-1.43816	0.0364	8.23451e-07	2.65041e-06	3.15884e-12	5.4518e-11
K19163	ccdB; toxin CcdB	0.747999	2.63517	-0.869154	-3.28661	1.78324	-1.7226	0.0495901	2.38472e-12	3.20889e-11	9.37804e-12	1.62354e-10
K19190	nboR; nicotine blue oxidoreductase [EC:1.1.1.328]	5.61741	7.71305	3.19886	-4.42472	1.27438	-3.06819	0.0648	1.00424e-12	1.76356e-11	4.38215e-11	5.72634e-10
K19191	mabO; 4-methylaminobutanoate oxidase (formaldehyde-forming) [EC:1.5.3.19]	3.05752	4.73547	0.595825	-4.46145	1.9935	-2.11831	0.0457909	4.413e-16	1.58555e-14	2.73799e-12	6.05076e-11
K19221	cobA, btuR; cob(I)alamin adenosyltransferase [EC:2.5.1.17]	7.80036	8.36858	6.57632	-1.80487	0.91672	-1.69606	0.0814	7.68118e-11	9.22706e-10	5.47252e-10	4.85885e-09
K19302	bcrC; undecaprenyl-diphosphatase [EC:3.6.1.27]	7.81572	8.67354	6.62307	-2.20751	0.946859	-2.29243	0.028	4.83434e-18	2.93183e-16	8.23872e-14	3.57096e-12
K19338	nac; LysR family transcriptional regulator, nitrogen assimilation regulatory protein	4.39656	4.8529	3.14409	-1.74823	1.03073	-1.56309	0.0741852	1.09539e-11	1.51311e-10	2.27163e-10	2.19465e-09
K19340	nosF; Cu-processing system ATP-binding protein	1.9255	2.61747	1.12393	-1.54973	1.36268	-1.03488	0.111778	1.05287e-06	4.21819e-06	2.68447e-08	1.6139e-07
K19341	nosY; Cu-processing system permease protein	1.95236	2.66765	1.04905	-1.62059	1.37254	-1.07294	0.1086	3.41082e-07	1.70423e-06	1.68503e-08	1.0583e-07
K19342	nosL; copper chaperone NosL	2.08825	2.75863	0.903479	-1.84555	1.36668	-1.23472	0.0909818	3.77762e-08	2.3018e-07	1.57964e-09	1.23351e-08
K19416	yccA; modulator of FtsH protease	4.48701	5.1984	3.67463	-1.66111	1.09191	-1.47151	0.0341932	2.20027e-12	3.46163e-11	5.76916e-13	1.59492e-11
K19710	E2.7.7.53; ATP adenylyltransferase [EC:2.7.7.53]	6.34124	8.14335	5.13228	-3.19195	1.2178	-2.42861	0.0623875	3.74156e-11	4.7462e-10	4.13479e-11	5.50681e-10
K19731	cciR; LuxR family transcriptional regulator, quorum-sensing system regulator CciR	-1.4676	-0.393997	-2.72848	-2.38302	2.16334	-1.01012	0.0898	2.60926e-05	6.6473e-05	1.79232e-08	9.86196e-08
K19745	acuI; acrylyl-CoA reductase (NADPH) [EC:1.3.1.-]	3.77585	4.74836	2.9111	-1.73695	1.61792	-1.04645	0.1364	8.54311e-08	5.52138e-07	2.44854e-07	1.23499e-06
Predicted genes were enriched in the PA communities
KO	description	rab.all	rab.win.FL	rab.win.PA	diff.btw	diff.win	effect	overlap	we.ep	we.eBH	wi.ep	wi.eBH
K00016	LDH, ldh; L-lactate dehydrogenase [EC:1.1.1.27]	2.07249	0.881777	2.78327	1.85517	1.6176	1.07428	0.119	5.46962e-08	3.55963e-07	5.34666e-08	3.02121e-07
K00066	algD; GDP-mannose 6-dehydrogenase [EC:1.1.1.132]	-2.30434	-3.90906	0.544801	4.49501	3.38482	1.25284	0.0762	6.51169e-08	2.96853e-07	2.59502e-09	1.69275e-08
K00137	prr; aminobutyraldehyde dehydrogenase [EC:1.2.1.19]	-0.510004	-1.88709	1.41145	3.52766	2.16288	1.63635	0.0213957	4.75266e-08	2.24914e-07	4.18619e-14	1.74519e-12
K00166	BCKDHA, bkdA1; 2-oxoisovalerate dehydrogenase E1 component alpha subunit [EC:1.2.4.4]	4.62621	3.40214	6.40895	3.39188	2.06997	1.59025	0.0518	2.30329e-12	3.71963e-11	8.09665e-12	1.56262e-10
K00167	BCKDHB, bkdA2; 2-oxoisovalerate dehydrogenase E1 component beta subunit [EC:1.2.4.4]	4.64964	3.70417	6.43696	3.16066	1.86571	1.61252	0.0542	5.96703e-12	8.7731e-11	1.78993e-11	3.05201e-10
K00290	LYS1; saccharopine dehydrogenase (NAD+, L-lysine forming) [EC:1.5.1.7]	4.64328	3.43035	6.40516	3.30456	1.81938	1.72774	0.0423915	6.08843e-14	1.40862e-12	1.89428e-12	4.48274e-11
K00360	nasB; assimilatory nitrate reductase electron transfer subunit [EC:1.7.99.-]	-2.14542	-4.07982	-0.723473	3.44681	3.07733	1.03623	0.0956	1.6654e-05	3.89077e-05	1.48168e-08	8.70177e-08
K00479	gbcA; glycine betaine catabolism A	-0.269182	-1.62379	1.0178	2.54275	1.98848	1.15511	0.1038	1.13512e-06	3.65304e-06	2.57068e-08	1.46487e-07
K00559	E2.1.1.41, SMT1, ERG6; sterol 24-C-methyltransferase [EC:2.1.1.41]	-2.4279	-5.07578	0.943267	6.0081	3.46066	1.62281	0.045	1.5682e-09	1.01155e-08	5.98797e-12	1.04351e-10
K00625	E2.3.1.8, pta; phosphate acetyltransferase [EC:2.3.1.8]	5.45829	4.68618	6.55057	1.77691	1.32796	1.23775	0.0915817	9.04224e-09	7.14751e-08	1.98597e-09	1.55537e-08
K00801	FDFT1; farnesyl-diphosphate farnesyltransferase [EC:2.5.1.21]	4.68969	4.09986	6.40507	2.45416	1.62611	1.30112	0.0821836	6.46289e-06	2.40461e-05	5.97056e-10	5.23981e-09
K00803	AGPS, agpS; alkyldihydroxyacetonephosphate synthase [EC:2.5.1.26]	1.12681	0.221252	1.94936	1.88003	1.41182	1.28198	0.0626	2.97121e-10	2.93098e-09	1.26921e-10	1.20515e-09
K00835	avtA; valine--pyruvate aminotransferase [EC:2.6.1.66]	4.60102	3.26067	6.36522	3.63066	3.00881	1.21774	0.0807838	8.78887e-09	6.94135e-08	3.56635e-10	3.29462e-09
K00863	DAK, TKFC; triose/dihydroxyacetone kinase / FAD-AMP lyase (cyclizing) [EC:2.7.1.28 2.7.1.29 4.6.1.15]	-1.01363	-2.18407	0.323394	2.60427	1.80185	1.42739	0.0332	3.08584e-07	1.05662e-06	9.14214e-12	1.14787e-10
K01053	E3.1.1.17, gnl, RGN; gluconolactonase [EC:3.1.1.17]	6.09404	5.47099	6.68907	1.27767	0.925975	1.27958	0.0856	1.22435e-08	9.42926e-08	5.95907e-10	5.21807e-09
K01060	cah; cephalosporin-C deacetylase [EC:3.1.1.41]	-1.30567	-3.17815	-0.0454959	3.39564	3.03085	1.0445	0.0811838	1.55581e-05	3.40878e-05	3.25486e-09	2.15215e-08
K01077	E3.1.3.1, phoA, phoB; alkaline phosphatase [EC:3.1.3.1]	5.55332	4.78334	6.59976	2.07613	1.39219	1.40846	0.0655869	3.64918e-09	3.10246e-08	9.25603e-11	1.00072e-09
K01133	betC; choline-sulfatase [EC:3.1.6.6]	4.55332	3.49771	6.38607	3.48027	2.11557	1.5667	0.0534	2.77627e-12	4.39704e-11	7.75318e-12	1.49504e-10
K01136	IDS; iduronate 2-sulfatase [EC:3.1.6.13]	4.47789	3.22528	6.374	3.7799	2.78096	1.38065	0.0714	1.45613e-08	1.10148e-07	1.53838e-10	1.56584e-09
K01137	GNS; N-acetylglucosamine-6-sulfatase [EC:3.1.6.14]	-1.09354	-3.25481	1.29706	4.79074	3.44329	1.297	0.065	2.77253e-08	1.53077e-07	1.06307e-10	1.09165e-09
K01138	K01138; uncharacterized sulfatase [EC:3.1.6.-]	4.65974	3.68586	6.52949	2.99569	1.5858	1.76949	0.0656	9.99871e-11	1.1705e-09	5.77204e-11	6.74086e-10
K01186	NEU1; sialidase-1 [EC:3.2.1.18]	5.55256	4.36452	7.38158	3.41676	2.13503	1.46663	0.0672	1.02291e-08	7.99351e-08	1.23515e-10	1.29113e-09
K01222	E3.2.1.86A, celF; 6-phospho-beta-glucosidase [EC:3.2.1.86]	-0.138623	-1.35173	0.884705	2.45463	1.93478	1.23378	0.0731854	8.09186e-07	2.43088e-06	5.97556e-10	4.88163e-09
K01565	SGSH; N-sulfoglucosamine sulfohydrolase [EC:3.10.1.1]	-3.5406	-5.61441	0.250753	5.75999	4.15052	1.30762	0.0767846	1.38332e-07	5.13975e-07	4.56855e-09	2.7423e-08
K01598	PPCDC, coaC; phosphopantothenoylcysteine decarboxylase [EC:4.1.1.36]	4.47254	3.23752	6.36382	3.50557	2.20083	1.44833	0.074	4.18039e-09	3.49797e-08	2.24403e-10	2.18437e-09
K01663	HIS7; glutamine amidotransferase / cyclase [EC:2.4.2.- 4.1.3.-]	-3.54227	-5.61525	0.262365	5.73599	4.2469	1.28626	0.0781844	3.11162e-08	1.68354e-07	6.03968e-09	3.6259e-08
K01677	E4.2.1.2AA, fumA; fumarate hydratase subunit alpha [EC:4.2.1.2]	-1.71247	-3.31175	-0.00644298	3.23858	2.79733	1.04341	0.1192	3.46653e-05	8.13308e-05	1.12746e-07	5.46293e-07
K01678	E4.2.1.2AB, fumB; fumarate hydratase subunit beta [EC:4.2.1.2]	-1.95192	-3.71648	-0.198808	3.39141	3.00611	1.02084	0.127375	7.54311e-05	0.000152482	3.10406e-07	1.30886e-06
K01818	fucI; L-fucose/D-arabinose isomerase [EC:5.3.1.25 5.3.1.3]	4.3952	3.19701	6.35661	3.78178	3.06525	1.25977	0.0686	1.42888e-09	1.31735e-08	1.1003e-10	1.1596e-09
K01822	E5.3.3.1; steroid Delta-isomerase [EC:5.3.3.1]	-0.0971356	-2.24794	1.37641	3.77026	1.97586	1.87145	0.00779849	6.52291e-09	3.37346e-08	2.02042e-15	1.59141e-13
K01839	deoB; phosphopentomutase [EC:5.4.2.7]	4.60736	3.64394	6.45309	2.75986	1.55112	1.67634	0.0521896	2.68962e-12	4.27705e-11	6.57811e-12	1.29866e-10
K01843	kamA; lysine 2,3-aminomutase [EC:5.4.3.2]	5.19783	4.31487	6.51861	2.23186	1.53726	1.36578	0.0775845	9.23083e-09	7.28024e-08	3.87403e-10	3.54932e-09
K01922	PPCS, COAB; phosphopantothenate---cysteine ligase (ATP) [EC:6.3.2.51]	4.44695	3.20998	6.35719	3.54407	2.26627	1.41684	0.075185	5.4104e-09	4.43735e-08	2.43518e-10	2.34761e-09
K01941	E6.3.4.6; urea carboxylase [EC:6.3.4.6]	4.71934	3.41303	6.39447	3.38045	2.39444	1.35687	0.0693861	5.37041e-10	5.4124e-09	1.4042e-10	1.4411e-09
K01958	PC, pyc; pyruvate carboxylase [EC:6.4.1.1]	4.70914	3.66143	6.45186	2.9913	1.46442	1.9797	0.019996	6.39339e-16	2.30223e-14	2.38425e-14	1.31217e-12
K02068	ABC.X2.A; putative ABC transport system ATP-binding protein	0.6361	-1.81055	1.96364	3.79955	2.17646	1.64954	0.0281944	4.81655e-08	2.07171e-07	1.72955e-13	5.95401e-12
K02171	blaI; BlaI family transcriptional regulator, penicillinase repressor	-2.24796	-4.90173	0.347165	5.50729	3.54907	1.43518	0.0613877	1.30003e-08	7.51084e-08	1.30496e-10	1.25045e-09
K02347	polX, dpx; DNA polymerase (family X)	5.77085	4.97701	6.59627	1.77271	1.38216	1.16366	0.08	1.81526e-07	1.10191e-06	5.09189e-10	4.53374e-09
K02380	fdhE; FdhE protein	-0.838353	-2.17652	0.398946	2.58579	1.8672	1.26397	0.062	8.16973e-05	0.000176958	9.8998e-11	9.71089e-10
K02445	glpT; MFS transporter, OPA family, glycerol-3-phosphate transporter	4.40205	3.2138	6.36818	3.80419	3.11087	1.26827	0.0659868	1.61371e-09	1.47037e-08	1.43894e-10	1.46529e-09
K02453	gspD; general secretion pathway protein D	6.50466	6.06744	7.57124	1.46623	1.0896	1.22051	0.0842	2.58992e-08	1.88268e-07	9.1689e-10	7.72198e-09
K02455	gspF; general secretion pathway protein F	6.15352	5.7231	6.80673	1.17896	0.94157	1.11497	0.0988	1.03301e-07	6.62836e-07	6.29848e-09	4.4473e-08
K02478	K02478; two-component system, LytTR family, sensor kinase [EC:2.7.13.3]	-0.0774987	-1.03778	0.852232	2.01927	1.63259	1.19234	0.0531894	1.45006e-08	8.21148e-08	3.05098e-10	2.45365e-09
K02482	K02482; two-component system, NtrC family, sensor kinase [EC:2.7.13.3]	0.390475	-0.668147	1.09273	1.86772	1.14744	1.59411	0.03	3.677e-09	1.71336e-08	1.07599e-12	2.09623e-11
K02757	PTS-Bgl-EIIC, bglF, bglP; PTS system, beta-glucoside-specific IIC component	-0.38569	-2.18972	1.00693	3.39973	3.07338	1.01229	0.104579	2.10379e-05	5.21144e-05	1.58139e-08	9.68811e-08
K02773	PTS-Gat-EIIA, gatA, sgcA; PTS system, galactitol-specific IIA component [EC:2.7.1.200]	-1.51222	-3.88201	-0.253039	3.95026	3.49083	1.05071	0.0922	3.67981e-06	1.08289e-05	7.58325e-09	4.77142e-08
K02774	PTS-Gat-EIIB, gatB, sgcB; PTS system, galactitol-specific IIB component [EC:2.7.1.200]	-1.53653	-3.97392	-0.251607	4.0801	3.64495	1.05035	0.089782	2.77695e-06	8.24233e-06	7.00768e-09	4.42498e-08
K02775	PTS-Gat-EIIC, gatC, sgcC; PTS system, galactitol-specific IIC component	-1.89549	-4.16363	-0.597747	3.83013	3.40822	1.06472	0.0877824	2.37409e-06	7.38927e-06	5.9976e-09	3.82778e-08
K02777	PTS-Glc-EIIA, crr; PTS system, sugar-specific IIA component [EC:2.7.1.-]	-1.5839	-3.48137	0.0180412	3.61608	3.19786	1.0514	0.107978	1.91112e-06	6.7601e-06	5.1994e-08	2.68951e-07
K02783	PTS-Gut-EIIC, srlA; PTS system, glucitol/sorbitol-specific IIC component	-1.58884	-3.84492	-0.208265	3.76815	3.19189	1.10443	0.064	3.24785e-06	9.15861e-06	2.53622e-10	2.18324e-09
K02824	pyrP, uraA; uracil permease	0.0495073	-1.35984	1.07259	2.57246	1.87616	1.30147	0.0776	9.11129e-09	6.21965e-08	9.67056e-10	6.90048e-09
K03219	yscC, sctC, ssaC; type III secretion protein C	-1.30315	-2.44784	0.674699	3.22819	2.76032	1.06	0.117576	0.00013287	0.000253642	9.79158e-08	4.94657e-07
K03222	yscJ, sctJ, hrcJ, ssaJ; type III secretion protein J	-1.26093	-2.39197	1.23767	3.50465	2.81005	1.14904	0.103179	7.42668e-07	2.55967e-06	3.22936e-08	1.72538e-07
K03223	yscL, sctL; type III secretion protein L	-1.46754	-2.42715	1.09501	3.34463	2.73266	1.11023	0.1296	1.27489e-06	4.3432e-06	5.32141e-07	1.9937e-06
K03224	yscN, sctN, hrcN, ssaN; ATP synthase in type III secretion protein N [EC:3.6.3.14]	-1.17251	-2.22201	1.19881	3.28753	2.62693	1.10958	0.113777	1.64423e-06	4.78842e-06	8.43376e-08	4.30916e-07
K03226	yscR, sctR, hrcR, ssaR; type III secretion protein R	-1.09443	-2.47754	1.20281	3.61518	2.70181	1.23865	0.0887822	1.14004e-07	4.50666e-07	3.22599e-09	2.21003e-08
K03227	yscS, sctS, hrcS, ssaS; type III secretion protein S	-1.11986	-2.55309	1.17819	3.6288	2.74474	1.20422	0.0918	4.40168e-07	1.60689e-06	6.74228e-09	4.31893e-08
K03228	yscT, sctT, hrcT, ssaT; type III secretion protein T	-1.10785	-2.53058	1.18518	3.61633	2.7075	1.22174	0.0859828	3.46467e-07	1.18025e-06	4.3311e-09	2.81395e-08
K03229	yscU, sctU, hrcU, ssaU; type III secretion protein U	-1.09992	-2.51763	1.19986	3.59999	2.7077	1.21749	0.0831834	2.51253e-07	9.79356e-07	3.38664e-09	2.26634e-08
K03230	yscV, sctV, hrcV, ssaV, invA; type III secretion protein V	-1.22927	-2.47517	1.21782	3.63953	2.83256	1.18271	0.0975805	6.21524e-07	1.96502e-06	1.22064e-08	7.36611e-08
K03299	TC.GNTP; gluconate:H+ symporter, GntP family	2.27442	1.87204	3.30972	1.366	1.07796	1.16975	0.105379	1.57834e-08	1.11176e-07	4.9697e-08	2.5996e-07
K03317	TC.CNT; concentrative nucleoside transporter, CNT family	5.3567	4.06534	6.47325	2.4118	1.62013	1.38787	0.0646	2.24711e-10	2.45346e-09	7.25999e-11	8.11488e-10
K03429	ugtP; processive 1,2-diacylglycerol beta-glucosyltransferase [EC:2.4.1.315]	5.0914	4.1373	6.41564	2.62285	1.98572	1.21799	0.0832	4.47259e-08	3.09999e-07	1.05915e-09	8.81781e-09
K03453	TC.BASS; bile acid:Na+ symporter, BASS family	5.72195	5.01657	6.61361	1.75359	1.12259	1.4617	0.0609878	2.67269e-10	2.87175e-09	3.7662e-11	5.14965e-10
K03471	rnhC; ribonuclease HIII [EC:3.1.26.4]	5.09304	4.15242	6.42647	2.55695	1.90098	1.26464	0.0721856	6.11517e-10	6.09885e-09	2.06014e-10	2.02022e-09
K03475	PTS-Ula-EIIC, ulaA, sgaT; PTS system, ascorbate-specific IIC component	-1.75863	-3.96269	-0.125865	4.02547	3.48987	1.07265	0.0907818	8.93814e-07	3.41095e-06	7.43352e-09	4.71315e-08
K03649	mug; double-stranded uracil-DNA glycosylase [EC:3.2.2.28]	-0.361025	-1.45351	0.715535	2.17824	1.56567	1.31819	0.0665867	3.61041e-07	1.0144e-06	4.68092e-10	3.44358e-09
K03669	mdoH; membrane glycosyltransferase [EC:2.4.1.-]	5.2293	4.60475	6.48736	2.04687	1.33194	1.43635	0.0583883	1.0778e-10	1.25453e-09	2.84976e-11	4.2342e-10
K03670	mdoG; periplasmic glucans biosynthesis protein	5.26932	4.68466	6.51486	1.89442	1.26625	1.41026	0.0591882	3.26814e-10	3.4484e-09	4.59289e-11	5.83439e-10
K03698	cbf, cbf1; 3'-5' exoribonuclease [EC:3.1.-.-]	4.66963	3.87189	6.45561	2.73692	1.4637	1.75313	0.0646	8.12155e-12	1.16216e-10	4.66059e-11	5.91267e-10
K03800	lplA, lplJ; lipoate---protein ligase [EC:6.3.1.20]	5.41802	4.49189	6.59135	2.10076	1.45472	1.3786	0.0707858	1.22178e-10	1.40794e-09	1.49991e-10	1.52162e-09
K03819	wcaB; putative colanic acid biosynthesis acetyltransferase WcaB [EC:2.3.1.-]	-2.31778	-4.70876	0.936228	5.68706	3.15051	1.70207	0.0385923	1.18976e-09	7.81737e-09	3.36409e-12	6.12381e-11
K03886	MQCRA, qcrA, bfcA, petC; menaquinol-cytochrome c reductase iron-sulfur subunit [EC:1.10.2.-]	-1.32989	-2.85053	0.589114	3.66559	2.90299	1.20338	0.059788	1.48592e-07	6.43709e-07	4.11089e-10	3.24954e-09
K04068	nrdG; anaerobic ribonucleoside-triphosphate reductase activating protein [EC:1.97.1.4]	-0.0567215	-1.90396	1.31979	3.35165	2.2089	1.42161	0.07	2.70145e-07	1.07278e-06	2.09491e-10	1.97386e-09
K04072	adhE; acetaldehyde dehydrogenase / alcohol dehydrogenase [EC:1.2.1.10 1.1.1.1]	-0.563319	-2.27784	0.607507	2.95394	2.65676	1.06369	0.0967806	3.35709e-06	1.05368e-05	6.56507e-09	4.25436e-08
K04486	E3.1.3.15B; histidinol-phosphatase (PHP family) [EC:3.1.3.15]	5.30056	4.29981	6.45159	2.19946	1.61341	1.23622	0.103	6.56954e-08	4.40069e-07	6.62198e-09	4.66979e-08
K05020	opuD, betL; glycine betaine transporter	-1.70083	-3.20702	0.673003	4.26108	3.36205	1.17139	0.0802	1.04205e-06	2.90465e-06	1.82719e-09	1.25898e-08
K05881	dhaM; phosphoenolpyruvate---glycerone phosphotransferase subunit DhaM [EC:2.7.1.121]	-2.35049	-4.1577	-0.793663	3.53611	3.1781	1.06806	0.070186	3.94951e-05	7.64607e-05	5.92146e-09	3.14128e-08
K05884	comC; L-2-hydroxycarboxylate dehydrogenase (NAD+) [EC:1.1.1.337]	-3.53527	-5.53554	0.24638	5.66067	4.24658	1.26711	0.0834	4.30784e-08	2.2067e-07	1.58641e-08	6.95285e-08
K05917	CYP51; sterol 14-demethylase [EC:1.14.13.70]	-1.49891	-3.56887	1.27058	4.86992	2.51588	1.84776	0.0186	2.28657e-09	1.26311e-08	5.04482e-14	1.99996e-12
K05928	E2.1.1.95; tocopherol O-methyltransferase [EC:2.1.1.95]	-1.64033	-3.97848	1.68959	5.0119	3.93645	1.18334	0.0919816	7.22029e-08	3.541e-07	3.4818e-09	2.44459e-08
K05939	aas; acyl-[acyl-carrier-protein]-phospholipid O-acyltransferase / long-chain-fatty-acid--[acyl-carrier-protein] ligase [EC:2.3.1.40 6.2.1.20]	5.77408	4.89387	7.42813	2.5546	1.70197	1.3465	0.0768	1.25499e-08	9.66367e-08	2.87973e-10	2.72209e-09
K05991	E3.2.1.123; endoglycosylceramidase [EC:3.2.1.123]	-1.53827	-4.23365	1.97743	6.18095	3.33753	1.77512	0.0272	3.96462e-10	2.98146e-09	1.57211e-13	5.46866e-12
K06045	shc; squalene-hopene/tetraprenyl-beta-curcumene cyclase [EC:5.4.99.17 4.2.1.129]	5.21072	4.64011	6.56964	2.06381	1.4443	1.30095	0.0765847	7.49529e-06	2.73098e-05	2.37556e-10	2.29679e-09
K06200	cstA; carbon starvation protein	5.0063	4.44875	6.63987	2.19845	1.19897	1.65341	0.0706	1.3569e-10	1.54964e-09	8.8016e-11	9.57364e-10
K06218	relE, stbE; mRNA interferase RelE/StbE	4.65785	3.83052	6.46383	2.59122	1.6685	1.39805	0.082	8.43986e-08	5.51829e-07	7.23977e-10	6.24105e-09
K06609	iolT; MFS transporter, SP family, major inositol transporter	-2.68186	-5.07917	-0.991334	4.21234	3.31554	1.21929	0.0587882	6.17675e-07	2.14833e-06	3.62144e-10	2.8001e-09
K06720	ectC; L-ectoine synthase [EC:4.2.1.108]	-1.3713	-2.46382	0.0488752	2.47458	2.22656	1.04331	0.0876	1.30028e-05	3.4824e-05	3.23607e-08	1.57893e-07
K06936	K06936; uncharacterized protein	-3.2071	-5.22704	-1.04597	4.15136	2.93406	1.33031	0.055	7.70298e-06	1.63525e-05	1.97634e-10	1.62839e-09
K06967	trmK; tRNA (adenine22-N1)-methyltransferase [EC:2.1.1.217]	-1.05033	-2.54073	0.0595414	2.93413	2.6503	1.02864	0.1032	4.6282e-06	1.46976e-05	2.02743e-08	1.17581e-07
K07051	K07051; uncharacterized protein	4.82336	3.59263	6.39368	2.88862	1.77237	1.50719	0.0646	2.93269e-11	3.7835e-10	4.49073e-11	5.77698e-10
K07173	luxS; S-ribosylhomocysteine lyase [EC:4.4.1.21]	-0.867996	-2.75991	0.27275	3.41613	2.93568	1.08975	0.0945811	1.05265e-06	4.12102e-06	9.45368e-09	6.02525e-08
K07228	K07228; TrkA domain protein	-2.19979	-4.09658	-0.459893	3.59211	2.50629	1.37474	0.0371926	3.47553e-07	1.20276e-06	1.91883e-11	1.9771e-10
K07244	K07244; mgtE-like transporter	-2.41861	-5.06548	0.957116	6.01651	3.35042	1.75075	0.023	3.91673e-10	2.90504e-09	1.09692e-13	3.70707e-12
K07276	K07276; uncharacterized protein	4.64077	3.35889	6.41109	3.3156	2.14594	1.41742	0.0714	2.88716e-10	3.07775e-09	2.01159e-10	1.98295e-09
K07445	K07445; putative DNA methylase	4.44716	3.2128	6.36227	3.84602	3.06449	1.33863	0.0636	1.3328e-09	1.23512e-08	7.41013e-11	8.3088e-10
K07457	K07457; endonuclease III related protein	-0.989175	-1.85947	0.328779	2.69711	2.36492	1.02632	0.1064	3.37667e-06	9.81594e-06	4.728e-08	2.47711e-07
K07640	cpxA; two-component system, OmpR family, sensor histidine kinase CpxA [EC:2.7.13.3]	4.44078	3.26073	6.36031	3.56319	2.60893	1.26481	0.0803839	3.40694e-08	2.40204e-07	4.24867e-10	3.85712e-09
K07641	creC; two-component system, OmpR family, sensor histidine kinase CreC [EC:2.7.13.3]	4.84356	3.9084	6.38907	2.85018	2.02408	1.42488	0.0462	2.4747e-12	3.96923e-11	2.96167e-12	6.5324e-11
K07663	creB; two-component system, OmpR family, catabolic regulation response regulator CreB	4.84118	3.90708	6.38567	2.8499	2.02231	1.41998	0.045191	2.45202e-12	3.93582e-11	2.94687e-12	6.50655e-11
K07979	ytrA; GntR family transcriptional regulator	2.4946	1.49542	2.97399	1.40206	1.2015	1.0773	0.1222	4.3842e-08	2.92842e-07	1.01434e-07	5.3829e-07
K08194	dgoT; MFS transporter, ACS family, D-galactonate transporter	-1.18143	-2.61934	0.665855	3.53197	2.51743	1.35515	0.047	4.32978e-07	1.29206e-06	1.21983e-11	1.59303e-10
K08302	gatY-kbaY; tagatose 1,6-diphosphate aldolase GatY/KbaY [EC:4.1.2.40]	-2.93688	-5.29587	-1.34199	3.9614	3.58243	1.04162	0.111778	1.01765e-05	2.75688e-05	1.27098e-07	5.7489e-07
K08677	K08677; kumamolisin	-3.23653	-5.47925	-1.23265	4.11799	3.46989	1.09547	0.088	1.40989e-05	2.94453e-05	2.07881e-08	1.12238e-07
K09146	K09146; uncharacterized protein	-2.63494	-4.17191	-1.1724	3.11613	2.88557	1.0092	0.0936	6.5842e-05	0.000122762	4.10522e-08	1.95782e-07
K09153	K09153; uncharacterized protein	-0.263633	-2.91894	1.65756	4.62213	2.43708	1.83244	0.0114	1.44921e-09	9.97892e-09	2.22936e-15	1.91655e-13
K09779	K09779; uncharacterized protein	-0.673435	-2.61181	0.449541	3.07286	2.56019	1.1304	0.090182	2.96812e-06	9.56785e-06	4.47774e-09	3.02244e-08
K09820	ABC.MN.A; manganese/iron transport system ATP-binding protein	4.60701	3.53436	6.39392	3.22963	2.25759	1.29056	0.0755849	1.02813e-07	6.57713e-07	3.33077e-10	3.10018e-09
K09825	perR; Fur family transcriptional regulator, peroxide stress response regulator	5.19722	4.33285	6.54893	2.25272	1.49083	1.39509	0.0804	7.91441e-10	7.70888e-09	4.0926e-10	3.72253e-09
K09879	crtU; isorenieratene synthase	-2.89226	-5.00483	-0.540561	4.40041	3.32392	1.22488	0.0652	1.25016e-06	3.60219e-06	1.96966e-09	1.25387e-08
K09913	ppnP; purine/pyrimidine-nucleoside phosphorylase [EC:2.4.2.1 2.4.2.2]	5.28617	4.73774	6.46829	1.76702	1.18209	1.42131	0.0435913	4.47174e-10	4.58547e-09	2.85866e-12	6.28484e-11
K09967	K09967; uncharacterized protein	5.69854	4.55896	7.41135	3.25353	2.07139	1.48136	0.0682	8.66048e-11	1.0293e-09	1.14194e-10	1.20264e-09
K09974	K09974; uncharacterized protein	5.69835	4.8506	6.50019	2.08906	2.91864	1.00173	0.0672	1.14333e-07	7.27733e-07	9.66195e-11	1.03733e-09
K10010	ABC.CYST.A; cystine transport system ATP-binding protein [EC:3.6.3.-]	-0.566402	-2.04874	0.296222	2.53149	2.26291	1.06867	0.0873825	2.61744e-06	7.81531e-06	9.7624e-09	5.73648e-08
K10531	pvdA, SIDA; L-ornithine N5-monooxygenase [EC:1.14.13.195 1.14.13.196]	-1.02319	-2.04474	0.0675979	2.12238	1.82885	1.07556	0.0882	3.27874e-05	7.13185e-05	1.61435e-08	8.47506e-08
K10560	rhaP; rhamnose transport system permease protein	4.41106	3.20326	6.35574	3.77595	3.29692	1.29023	0.054789	2.20532e-10	2.40958e-09	1.246e-11	2.24579e-10
K10561	rhaQ; rhamnose transport system permease protein	5.39996	4.21902	7.35446	3.7825	3.40154	1.25466	0.0604	8.58003e-10	8.31056e-09	3.74215e-11	5.06994e-10
K10562	rhaT; rhamnose transport system ATP-binding protein [EC:3.6.3.17]	4.51196	3.30909	6.3621	3.51631	2.44491	1.3861	0.0687862	1.41668e-10	1.60859e-09	7.18778e-11	8.12763e-10
K10797	enr; 2-enoate reductase [EC:1.3.1.31]	-2.40068	-4.37578	-1.1196	3.41097	3.07201	1.05074	0.085183	2.16564e-05	4.64228e-05	1.12824e-08	6.37961e-08
K10800	SMUG1; single-strand selective monofunctional uracil DNA glycosylase [EC:3.2.2.-]	4.42448	3.19778	6.35869	3.80435	3.10881	1.30511	0.0583883	3.99505e-10	4.13823e-09	2.5435e-11	3.92529e-10
K10907	K10907; aminotransferase [EC:2.6.1.-]	5.73589	4.87133	7.43739	2.61272	1.74905	1.39217	0.0767846	9.63726e-10	9.23829e-09	2.40352e-10	2.31987e-09
K11089	TROVE2, SSA2; 60 kDa SS-A/Ro ribonucleoprotein	-1.17038	-3.11264	1.65282	4.46372	3.00953	1.41331	0.0506	5.14745e-08	2.144e-07	1.47475e-11	2.12701e-10
K11358	yhdR; aspartate aminotransferase [EC:2.6.1.1]	-1.91132	-4.07458	-0.809476	3.39895	2.76531	1.10984	0.0956	3.49898e-06	1.15632e-05	1.35117e-08	8.11808e-08
K11530	lsrG; (4S)-4-hydroxy-5-phosphonooxypentane-2,3-dione isomerase [EC:5.3.1.32]	-2.94152	-4.70704	0.32643	5.11649	3.78611	1.27927	0.0738	1.2949e-08	7.53724e-08	1.95706e-09	1.31709e-08
K11604	sitA; manganese/iron transport system substrate-binding protein	4.45052	3.30611	6.35999	3.61102	2.59235	1.33637	0.0722	9.96001e-10	9.48274e-09	1.41495e-10	1.45526e-09
K11605	sitC; manganese/iron transport system permease protein	4.44778	3.31014	6.36094	3.62283	2.56822	1.35269	0.069986	9.9936e-10	9.5145e-09	1.42999e-10	1.46872e-09
K11606	sitD; manganese/iron transport system permease protein	4.44847	3.29992	6.35827	3.64984	2.56857	1.38964	0.0689862	1.00391e-09	9.55078e-09	1.43258e-10	1.47021e-09
K11607	sitB; manganese/iron transport system ATP-binding protein	4.44916	3.30278	6.36241	3.66797	2.60879	1.37467	0.0712	9.53671e-10	9.11325e-09	1.44748e-10	1.48425e-09
K11731	atuD; citronellyl-CoA dehydrogenase [EC:1.3.99.-]	1.35345	0.00915591	1.81032	1.83981	1.39605	1.26683	0.097	1.89253e-09	1.61083e-08	9.51975e-09	6.0485e-08
K13671	K13671; alpha-1,2-mannosyltransferase [EC:2.4.1.-]	-0.578352	-2.01731	0.784941	2.89417	2.07866	1.35115	0.0521896	3.95073e-07	1.12655e-06	2.9488e-11	3.40164e-10
K13730	inlA; internalin A	-0.511844	-2.60742	2.14307	4.33642	3.4042	1.22736	0.0688	6.55289e-08	3.29401e-07	2.49681e-10	2.28208e-09
K13747	nspC; carboxynorspermidine decarboxylase [EC:4.1.1.96]	4.61925	3.41924	6.39188	3.31044	1.8313	1.70445	0.0396	5.19013e-14	1.2165e-12	1.80263e-12	4.30498e-11
K13893	yejA; microcin C transport system substrate-binding protein	5.29528	4.74149	6.53904	1.8698	1.18213	1.52265	0.0507898	2.44737e-10	2.65051e-09	5.7632e-12	1.15156e-10
K13894	yejB; microcin C transport system permease protein	5.28341	4.70789	6.51339	1.85327	1.17077	1.51377	0.0543891	2.05627e-10	2.26334e-09	6.95973e-12	1.35966e-10
K13895	yejE; microcin C transport system permease protein	5.2814	4.71034	6.51161	1.85702	1.18711	1.5023	0.0509898	2.04981e-10	2.2585e-09	6.77519e-12	1.32791e-10
K13950	pabAB; para-aminobenzoate synthetase [EC:2.6.1.85]	-0.289812	-2.48514	0.730241	3.25885	2.59111	1.18284	0.0866	1.3875e-06	4.29008e-06	2.42932e-09	1.76031e-08
K14266	prnA, rebH, ktzQ; tryptophan 7-halogenase [EC:1.14.19.9]	6.0785	4.87524	7.95235	3.59161	2.79333	1.34001	0.0657868	3.14869e-10	3.33674e-09	7.17346e-11	8.05199e-10
K14337	mptA; alpha-1,6-mannosyltransferase [EC:2.4.1.-]	-1.4174	-3.38041	0.293537	3.89278	2.45318	1.52806	0.0224	6.41987e-08	2.98423e-07	2.64796e-13	7.18233e-12
K14339	mptB; alpha-1,6-mannosyltransferase [EC:2.4.1.-]	-2.08936	-3.94398	-0.755955	3.32777	2.67834	1.1681	0.0665867	1.15628e-06	3.91514e-06	7.95307e-10	5.79537e-09
K14414	rtcR; transcriptional regulatory protein RtcR	0.479418	-1.73945	1.74689	3.05662	2.79447	1.01957	0.127774	1.03727e-06	4.02353e-06	1.14917e-07	6.02371e-07
K14445	SLC13A2_3_5; solute carrier family 13 (sodium-dependent dicarboxylate transporter), member 2/3/5	5.08096	4.52148	6.42591	2.05207	1.78465	1.04442	0.0966	3.26323e-06	1.36721e-05	4.93505e-09	3.57506e-08
K14645	K14645; serine protease [EC:3.4.21.-]	0.994823	0.406071	2.16663	1.68323	1.4506	1.03365	0.1346	5.00395e-05	0.000110086	4.9767e-07	2.10996e-06
K14743	mycP; membrane-anchored mycosin MYCP [EC:3.4.21.-]	-1.55798	-3.46226	-0.484622	3.0852	2.74034	1.04662	0.088	3.74339e-06	1.09394e-05	8.86738e-09	5.38273e-08
K14949	pknG; serine/threonine-protein kinase PknG [EC:2.7.11.1]	-2.25263	-4.03246	-0.794582	3.43045	2.95583	1.10401	0.0766	1.46321e-05	3.28984e-05	2.60653e-09	1.61653e-08
K15468	pksS; cytochrome P450 PksS	-3.48835	-5.71269	-1.77307	3.95812	3.24704	1.10194	0.0871826	4.81146e-06	1.39025e-05	2.46827e-08	1.2749e-07
K15581	oppB; oligopeptide transport system permease protein	5.17057	4.27466	6.51132	2.49077	1.5177	1.55009	0.0568	2.38017e-12	3.83575e-11	8.44408e-12	1.61633e-10
K15986	ppaC; manganese-dependent inorganic pyrophosphatase [EC:3.6.1.1]	5.02822	4.05149	6.42846	2.59358	1.68937	1.48721	0.0592	1.57516e-11	2.13296e-10	2.53928e-11	3.92876e-10
K16087	TC.FEV.OM3, tbpA, hemR, lbpA, hpuB, bhuR, hugA, hmbR; hemoglobin/transferrin/lactoferrin receptor protein	5.96325	4.91033	6.60749	1.64237	1.28537	1.23275	0.0965807	2.50532e-09	2.19579e-08	2.3823e-09	1.83011e-08
K16167	bpsA, srsA, pks11, pks10; alkylresorcinol/alkylpyrone synthase	4.4327	3.20317	6.36507	3.75776	3.09611	1.30527	0.0636	4.52834e-10	4.63096e-09	3.1889e-11	4.57979e-10
K16190	GLCAK; glucuronokinase [EC:2.7.1.43]	-3.09416	-5.25771	0.30083	5.65148	3.80215	1.42555	0.0502	4.22702e-07	1.12247e-06	7.64943e-11	7.15317e-10
K16515	galB; 4-oxalomesaconate hydratase [EC:4.2.1.83]	-2.8266	-4.28493	-1.6658	2.76269	2.4866	1.02864	0.0896	1.58342e-05	4.10559e-05	4.48352e-08	2.16489e-07
K16649	glft1; rhamnopyranosyl-N-acetylglucosaminyl-diphospho-decaprenol beta-1,3/1,4-galactofuranosyltransferase [EC:2.4.1.287]	-1.80993	-3.45614	-0.444382	3.12585	2.64779	1.08797	0.080184	3.30723e-06	8.96318e-06	3.78201e-09	2.36405e-08
K16650	glft2; galactofuranosylgalactofuranosylrhamnosyl-N-acetylglucosaminyl-diphospho-decaprenol beta-1,5/1,6-galactofuranosyltransferase [EC:2.4.1.288]	-1.08162	-2.94642	0.123288	3.33341	2.58173	1.21278	0.059788	1.30278e-06	3.84784e-06	2.10844e-10	1.75514e-09
K16922	yydH; putative peptide zinc metalloprotease protein	2.065	1.02374	2.9165	1.68442	1.50283	1.12962	0.1164	6.80185e-09	5.31358e-08	4.21521e-08	2.43937e-07
K17331	dasC; N,N'-diacetylchitobiose transport system permease protein	-2.40985	-4.01325	-0.826589	3.17735	2.96908	1.006	0.105179	3.96682e-06	1.18591e-05	7.02729e-08	3.44462e-07
K17883	mtr; mycothione reductase [EC:1.8.1.15]	-0.872425	-2.87138	1.79391	4.8818	2.21176	2.19729	0.00239969	5.44817e-10	3.57296e-09	8.1078e-17	1.68285e-14
K18009	budC; meso-butanediol dehydrogenase / (S,S)-butanediol dehydrogenase / diacetyl reductase [EC:1.1.1.- 1.1.1.76 1.1.1.304]	-1.00558	-2.77922	1.12225	4.03631	2.38206	1.64776	0.0194	1.4767e-08	8.34092e-08	3.49617e-14	1.6111e-12
K18230	tylC, oleB, carA, srmB; macrolide transport system ATP-binding/permease protein	-2.84835	-5.01388	-0.722639	4.4872	3.11456	1.38283	0.0385923	9.75657e-08	3.38268e-07	9.78184e-12	1.24688e-10
K18299	mexF; multidrug efflux pump	4.60303	3.78257	6.383	2.79252	1.79086	1.4614	0.0742	1.59052e-06	7.39656e-06	2.09539e-10	2.05731e-09
K18300	oprN; outer membrane protein, multidrug efflux system	-2.2646	-3.64596	0.513845	4.39088	3.31899	1.25749	0.0781844	9.06286e-08	3.81495e-07	2.85189e-09	1.94392e-08
K18475	fliB; lysine-N-methylase [EC:2.1.1.-]	-0.84085	-2.80559	0.886231	3.67341	3.02513	1.13278	0.0821836	8.10087e-07	3.08684e-06	2.21301e-09	1.60388e-08
K18672	dacA; diadenylate cyclase [EC:2.7.7.85]	5.14763	4.19347	6.47596	2.44997	1.78002	1.32668	0.0732	2.88588e-10	3.07936e-09	1.64574e-10	1.65361e-09
K18850	ycfD; 50S ribosomal protein L16 3-hydroxylase [EC:1.14.11.47]	4.51643	5.24879	3.63171	-1.73476	1.1332	-1.51016	0.035	1.48556e-12	2.4389e-11	4.74976e-13	1.39335e-11
K18901	bpeE; membrane fusion protein, multidrug efflux system	5.29545	4.34266	6.43351	2.08071	1.54315	1.28265	0.094	2.22289e-09	1.97044e-08	1.9389e-09	1.52159e-08
K18902	bpeF; multidrug efflux pump	5.29319	4.3362	6.43849	2.08414	1.55257	1.26977	0.0907818	2.55069e-09	2.23427e-08	2.1831e-09	1.69453e-08
K19136	csx17; CRISPR-associated protein Csx17	-3.44701	-5.57317	0.402428	5.80499	4.20065	1.29979	0.0711858	3.44374e-08	1.67073e-07	3.0105e-09	1.86415e-08
K19246	loxA; arachidonate 15-lipoxygenase [EC:1.13.11.33]	-4.25233	-6.02148	-1.5234	4.63536	4.04932	1.04414	0.116977	4.45104e-05	9.5814e-05	7.56033e-07	2.47042e-06
K19405	mcsB; protein arginine kinase [EC:2.7.14.1]	5.13252	4.14282	6.47794	2.54464	1.78122	1.2425	0.0836	3.28243e-07	1.87165e-06	6.03329e-10	5.30063e-09
K19411	mcsA; protein arginine kinase activator	5.15736	4.1599	6.47618	2.41083	1.73719	1.25678	0.0824	6.93099e-07	3.62872e-06	6.64505e-10	5.7836e-09
K19586	oqxA; membrane fusion protein, multidrug efflux system	4.50739	3.28024	6.37525	3.19243	1.97825	1.41515	0.0758	3.15922e-07	1.79608e-06	2.16351e-10	2.11483e-09
K19689	ampS, pepS, ampT; aminopeptidase [EC:3.4.11.-]	4.65431	3.43626	6.45235	3.05486	1.7386	1.70344	0.0404	1.63057e-13	3.44918e-12	1.82959e-12	4.36039e-11

## Sheet: ALDEx2_picrust2_Pathway_results
Metabolic functions of FL and PA communities based on MetaCyc pathway database.
Pathways were enriched in the FL communities
Pathway	description	rab.all	rab.win.FL	rab.win.PA	diff.btw	diff.win	effect	overlap	we.ep	we.eBH	wi.ep	wi.eBH
ANAEROFRUCAT-PWY	homolactic fermentation	4.026	4.70334	3.41638	-1.30939	0.476372	-2.59571	0.0212	1.01641e-18	1.41149e-16	8.02907e-14	2.55464e-12
BRANCHED-CHAIN-AA-SYN-PWY	superpathway of branched amino acid biosynthesis	5.0292	5.26384	4.50105	-0.757068	0.647604	-1.02812	0.15	1.47485e-06	7.45443e-06	8.98312e-07	4.14243e-06
COBALSYN-PWY	adenosylcobalamin salvage from cobinamide I	3.05764	4.18561	2.30177	-1.88621	0.492829	-3.60529	0.00340012	7.53368e-26	3.16415e-23	7.57496e-17	1.57209e-14
DAPLYSINESYN-PWY	L-lysine biosynthesis I	4.21968	4.65507	3.70283	-0.951761	0.504569	-1.80749	0.0375925	2.02876e-14	4.9673e-13	1.63999e-12	3.229e-11
DENOVOPURINE2-PWY	superpathway of purine nucleotides de novo biosynthesis II	3.2924	3.81579	2.58471	-1.18337	0.908219	-1.17679	0.1094	5.69511e-09	5.18925e-08	1.22314e-08	8.94623e-08
FAO-PWY	fatty acid &beta;-oxidation I	3.95558	4.22133	3.29425	-1.08901	0.604053	-1.76021	0.00820005	2.2402e-13	4.53866e-12	2.32715e-15	1.44947e-13
FASYN-ELONG-PWY	fatty acid elongation -- saturated	4.51246	4.8712	3.88618	-1.02864	0.557734	-1.81991	0.0257949	4.52633e-15	1.44803e-13	1.4042e-13	3.91031e-12
GLUCONEO-PWY	gluconeogenesis I	4.25251	4.72906	3.77914	-0.995949	0.482269	-2.04891	0.0106	3.62461e-17	3.23103e-15	2.61622e-15	2.06214e-13
GLYCOGENSYNTH-PWY	glycogen biosynthesis I (from ADP-D-Glucose)	4.02755	4.27431	3.51631	-0.730302	0.529628	-1.20888	0.117576	3.61806e-08	2.70149e-07	4.81408e-08	2.9295e-07
GLYCOLYSIS	glycolysis I (from glucose 6-phosphate)	4.55863	4.81328	4.03094	-0.802849	0.64237	-1.17638	0.124975	2.0502e-08	1.64805e-07	9.07029e-08	5.24621e-07
GLYCOLYSIS-TCA-GLYOX-BYPASS	superpathway of glycolysis, pyruvate dehydrogenase, TCA, and glyoxylate bypass	3.23434	3.41833	2.98942	-0.511006	0.489731	-1.00986	0.11	1.81092e-07	1.0885e-06	1.02736e-07	5.22282e-07
HEME-BIOSYNTHESIS-II	heme biosynthesis I (aerobic)	3.77387	4.10077	3.28446	-0.862514	0.44886	-1.90186	0.0277945	1.87051e-14	4.63085e-13	9.70271e-14	3.03157e-12
HEMESYN2-PWY	heme biosynthesis II (anaerobic)	4.22118	4.70465	3.8055	-0.926472	0.488655	-1.83174	0.0322	1.647e-14	4.17836e-13	3.51154e-13	8.67809e-12
ILEUSYN-PWY	L-isoleucine biosynthesis I (from threonine)	5.0614	5.31199	4.54343	-0.761636	0.587406	-1.14755	0.125	1.17201e-07	7.56363e-07	8.21468e-08	4.81492e-07
KETOGLUCONMET-PWY	ketogluconate metabolism	-0.8628	-0.335726	-1.54928	-1.18875	1.05811	-1.02815	0.132374	4.7807e-07	2.64769e-06	1.62493e-07	8.62548e-07
OANTIGEN-PWY	O-antigen building blocks biosynthesis (E. coli)	4.19495	4.62018	3.57188	-1.03763	0.571474	-1.64714	0.0653869	9.43191e-13	1.76312e-11	7.56435e-11	8.77973e-10
P105-PWY	TCA cycle IV (2-oxoglutarate decarboxylase)	3.66044	3.89688	3.25485	-0.623356	0.417535	-1.42059	0.0434	4.30932e-10	4.72979e-09	2.13351e-11	2.56243e-10
P125-PWY	superpathway of (R,R)-butanediol biosynthesis	0.728068	2.85715	-0.323816	-3.2241	0.978263	-3.03965	0.0616	5.58345e-16	2.69675e-14	2.88545e-11	4.25277e-10
P4-PWY	superpathway of L-lysine, L-threonine and L-methionine biosynthesis I	3.76081	4.07056	3.31034	-0.791475	0.494547	-1.53618	0.069986	1.08444e-09	1.15012e-08	1.28069e-10	1.3877e-09
PEPTIDOGLYCANSYN-PWY	peptidoglycan biosynthesis I (meso-diaminopimelate containing)	4.44092	4.655	3.96231	-0.665187	0.578856	-1.07611	0.1264	8.96152e-08	5.98013e-07	1.61453e-07	8.59549e-07
PWY-5101	L-isoleucine biosynthesis II	5.14951	5.40153	4.62988	-0.753051	0.59074	-1.14249	0.134973	2.40364e-07	1.42512e-06	1.46539e-07	7.99778e-07
PWY-5104	L-isoleucine biosynthesis IV	2.95571	3.2733	2.55681	-0.763154	0.653333	-1.1205	0.1042	1.32541e-08	1.09739e-07	1.27687e-08	8.95775e-08
PWY-5484	glycolysis II (from fructose 6-phosphate)	4.44137	4.74784	3.74275	-1.0239	0.619247	-1.53138	0.0712	9.88104e-12	1.55323e-10	3.92387e-10	3.77696e-09
PWY-5509	adenosylcobalamin biosynthesis from cobyrinate a,c-diamide I	2.44047	2.87772	1.70562	-1.26131	0.89107	-1.35597	0.0521896	1.77385e-10	2.2296e-09	1.43831e-11	2.26552e-10
PWY-5695	urate biosynthesis/inosine 5'-phosphate degradation	4.27304	4.59736	3.76425	-0.860294	0.549478	-1.52462	0.0405919	1.87096e-12	3.30436e-11	4.32092e-12	7.7029e-11
PWY-5918	superpathay of heme biosynthesis from glutamate	4.2306	4.49664	3.77767	-0.722433	0.503648	-1.33915	0.0652	4.03373e-10	4.65103e-09	1.51037e-10	1.57066e-09
PWY-5920	superpathway of heme biosynthesis from glycine	3.46279	4.00581	2.63459	-1.38272	0.757944	-1.66781	0.0673865	2.67763e-08	2.1198e-07	8.53753e-11	9.96862e-10
PWY-6269	adenosylcobalamin salvage from cobinamide II	2.43931	2.87147	1.70627	-1.25493	0.897058	-1.33584	0.0559888	4.24274e-10	4.86428e-09	3.90804e-11	5.03276e-10
PWY-6317	galactose degradation I (Leloir pathway)	3.96842	4.3651	3.23441	-1.2226	0.680214	-1.80185	0.0293941	7.84633e-15	2.27245e-13	2.26547e-13	5.95204e-12
PWY-6353	purine nucleotides degradation II (aerobic)	2.87665	3.33923	2.63283	-0.706509	0.451301	-1.51753	0.0518	3.8911e-12	6.19105e-11	4.1192e-11	4.78439e-10
PWY-6383	mono-trans, poly-cis decaprenyl phosphate biosynthesis	0.884189	1.84525	-0.766099	-2.61658	1.37006	-1.77588	0.0357929	1.27373e-14	3.367e-13	6.92128e-13	1.57551e-11
PWY-6385	peptidoglycan biosynthesis III (mycobacteria)	4.38983	4.63407	3.88992	-0.73669	0.540143	-1.29472	0.0798	7.18573e-10	7.82925e-09	1.51769e-09	1.28656e-08
PWY-6386	UDP-N-acetylmuramoyl-pentapeptide biosynthesis II (lysine-containing)	4.3334	4.63332	3.83757	-0.813531	0.5236	-1.48568	0.0563887	1.30626e-11	1.99138e-10	3.00079e-11	3.92292e-10
PWY-6387	UDP-N-acetylmuramoyl-pentapeptide biosynthesis I (meso-diaminopimelate containing)	4.42046	4.64728	3.92653	-0.705622	0.560243	-1.19968	0.0987802	7.295e-09	6.43893e-08	1.68911e-08	1.15482e-07
PWY-6545	pyrimidine deoxyribonucleotides de novo biosynthesis III	3.9903	4.43655	3.26867	-1.17487	0.774808	-1.32729	0.0667866	1.10345e-07	7.35308e-07	1.40753e-10	1.51568e-09
PWY-6581	spirilloxanthin and 2,2'-diketo-spirilloxanthin biosynthesis	-3.13001	-1.28997	-4.58623	-3.10863	1.85821	-1.61053	0.0336	2.28816e-07	7.44678e-07	1.2643e-12	2.50477e-11
PWY-6628	superpathway of L-phenylalanine biosynthesis	2.92469	3.17608	2.48597	-0.692635	0.621546	-1.04794	0.109	1.42626e-07	9.02266e-07	3.06461e-08	1.92058e-07
PWY-6630	superpathway of L-tyrosine biosynthesis	2.91207	3.16789	2.47368	-0.692599	0.615336	-1.04582	0.1072	1.05893e-07	6.95659e-07	1.91656e-08	1.27654e-07
PWY-6969	TCA cycle V (2-oxoglutarate:ferredoxin oxidoreductase)	4.73841	5.01059	4.2386	-0.764033	0.601098	-1.17346	0.116177	2.18846e-08	1.7379e-07	4.10345e-08	2.60124e-07
PWY-7094	fatty acid salvage	3.98047	4.26446	3.21324	-1.14271	0.54866	-2.06663	0.00140002	1.6911e-15	5.83139e-14	1.58529e-16	2.33056e-14
PWY-7187	pyrimidine deoxyribonucleotides de novo biosynthesis II	2.85581	3.32914	2.20505	-1.09047	0.848914	-1.1829	0.108378	4.16937e-09	3.91523e-08	1.22223e-08	8.90202e-08
PWY-7199	pyrimidine deoxyribonucleosides salvage	3.54457	3.87079	2.3146	-1.65325	0.781247	-2.04294	0.0107979	2.8507e-16	1.55497e-14	3.40375e-15	2.26175e-13
PWY-7200	superpathway of pyrimidine deoxyribonucleoside salvage	3.88301	4.26054	3.03264	-1.30711	0.621401	-2.05414	0.0153969	1.34349e-16	8.91464e-15	2.15846e-14	9.00489e-13
PWY0-1415	superpathway of heme biosynthesis from uroporphyrinogen-III	3.13491	3.83754	2.35125	-1.51347	0.714661	-1.92782	0.06	8.00952e-12	1.28577e-10	2.47141e-11	3.76422e-10
PWY0-1586	peptidoglycan maturation (meso-diaminopimelate containing)	3.85115	4.0847	3.44761	-0.660623	0.44316	-1.4487	0.0568	1.19958e-10	1.52151e-09	9.69972e-11	1.00492e-09
PWY0-781	aspartate superpathway	3.62837	3.92449	3.21168	-0.765988	0.511469	-1.45824	0.0687862	9.77227e-10	1.04623e-08	2.32546e-10	2.3233e-09
PWY1G-0	mycothiol biosynthesis	1.82372	3.93727	0.807272	-3.10255	0.962776	-3.02298	0.0631874	8.78233e-13	1.64901e-11	4.05396e-11	5.50098e-10
PYRIDNUCSAL-PWY	NAD salvage pathway I	3.13835	4.39016	2.42225	-1.94197	0.599132	-3.02327	0.0187963	2.33731e-21	4.90836e-19	1.15913e-14	6.3399e-13
REDCITCYC	TCA cycle VIII (helicobacter)	3.78117	4.34076	3.53725	-0.796289	0.672186	-1.15813	0.094781	2.5678e-09	2.49429e-08	5.11497e-09	3.85024e-08
SALVADEHYPOX-PWY	adenosine nucleotides degradation II	2.59689	2.9522	2.22809	-0.67677	0.616249	-1.0368	0.125175	1.29594e-07	8.18731e-07	2.45002e-07	1.23047e-06
UDPNAGSYN-PWY	UDP-N-acetyl-D-glucosamine biosynthesis I	3.83408	4.59342	3.28761	-1.29024	0.541032	-2.13168	0.0536	3.20802e-15	1.11185e-13	1.62147e-11	2.54604e-10
VALSYN-PWY	L-valine biosynthesis	5.06021	5.31109	4.5426	-0.757218	0.583535	-1.17576	0.120576	1.1899e-07	7.65352e-07	8.18892e-08	4.79691e-07
Pathways were enriched in the PA communities
Pathway	description	rab.all	rab.win.FL	rab.win.PA	diff.btw	diff.win	effect	overlap	we.ep	we.eBH	wi.ep	wi.eBH
FUCCAT-PWY	fucose degradation	-1.79568	-2.79674	-1.00961	1.75532	1.35919	1.26095	0.0954	4.78897e-10	5.20155e-09	3.69685e-09	2.91897e-08
GLCMANNANAUT-PWY	superpathway of N-acetylglucosamine, N-acetylmannosamine and N-acetylneuraminate degradation	-1.02912	-2.84968	-0.237609	2.36593	1.94353	1.17942	0.1024	3.93776e-09	3.59127e-08	1.01581e-08	7.33979e-08
METH-ACETATE-PWY	methanogenesis from acetate	-7.3818	-9.94511	-4.39408	5.39807	4.77139	1.0027	0.1444	9.36857e-05	0.000185421	3.96153e-06	1.18329e-05
P101-PWY	ectoine biosynthesis	-4.29765	-5.4365	-2.59726	2.86248	2.35099	1.1704	0.0782	1.73997e-06	6.10384e-06	1.39132e-09	1.08887e-08
P122-PWY	heterolactic fermentation	-0.74066	-1.70963	0.415763	2.189	1.63303	1.2761	0.0731854	3.91626e-09	3.51619e-08	3.39114e-10	3.29876e-09
P441-PWY	superpathway of N-acetylneuraminate degradation	-1.18096	-2.14073	-0.016041	2.17381	1.43992	1.45406	0.0743851	4.58415e-10	5.09995e-09	2.34737e-10	2.37719e-09
P461-PWY	hexitol fermentation to lactate, formate, ethanol and acetate	-4.69726	-6.2442	-3.14208	3.32897	3.04583	1.00976	0.117976	4.03314e-06	1.44718e-05	1.1663e-07	6.14604e-07
PWY-5910	superpathway of geranylgeranyldiphosphate biosynthesis I (via mevalonate)	-3.54234	-6.82457	-2.45743	4.81974	3.6673	1.25506	0.0673865	1.69651e-07	9.30554e-07	1.0116e-10	1.1309e-09
PWY-6891	thiazole biosynthesis II (Bacillus)	-5.21406	-7.20588	-3.45679	3.94526	3.52445	1.01131	0.117177	2.39645e-06	9.33524e-06	4.65301e-08	2.75888e-07
PWY-6895	superpathway of thiamin diphosphate biosynthesis II	-2.92927	-4.94205	-1.17194	4.05625	3.56995	1.05911	0.104579	9.35815e-07	4.0003e-06	7.97493e-09	6.06344e-08
PWY-6901	superpathway of glucose and xylose degradation	1.76241	0.355074	2.51555	1.9758	1.33879	1.3758	0.0645871	1.88535e-10	2.31843e-09	1.10173e-10	1.21095e-09
PWY-7003	glycerol degradation to butanol	-3.01798	-4.02308	-1.88113	2.17101	1.85983	1.01709	0.1176	0.00108787	0.00165563	5.23724e-08	3.05512e-07
PWY-922	mevalonate pathway I	-4.06378	-7.34271	-2.95416	4.70459	3.55287	1.2362	0.0705859	1.27027e-07	7.35597e-07	1.68984e-10	1.76478e-09
PWY0-1061	superpathway of L-alanine biosynthesis	3.13426	2.12966	3.90577	1.72051	0.824118	2.00579	0.0196	2.76989e-15	8.77465e-14	1.77232e-14	7.81725e-13
PWY0-1296	purine ribonucleosides degradation	1.94537	1.24725	3.38994	2.02073	1.08407	1.79088	0.0257949	6.16038e-14	1.36826e-12	7.2069e-14	2.38504e-12
PWY0-1297	superpathway of purine deoxyribonucleosides degradation	1.86237	1.04843	2.57013	1.57848	0.76094	2.03014	0.0297941	9.05666e-16	3.39974e-14	1.31481e-13	3.76635e-12
RHAMCAT-PWY	L-rhamnose degradation I	-0.950986	-1.71797	-0.419969	1.17689	1.02351	1.08701	0.1186	5.12631e-08	3.54414e-07	7.20901e-08	4.06133e-07
VALDEG-PWY	L-valine degradation I	-4.01927	-5.3892	-1.8488	4.12073	2.71354	1.47114	0.0293941	1.21578e-07	4.66932e-07	4.60349e-13	1.01344e-11
